# Supplementary material for: Contraceptive use and needs among adolescent women aged 15–19: Regional and global estimates and projections from 1990 to 2030 from a Bayesian hierarchical modelling study
Source: PubMed Central journal article supplement (PMC7932081; doi:10.1371/journal.pone.0247479), 2021-03-04

Contraceptive Use and Needs among Adolescent Women Aged 15-19:  
Regional and Global Estimates and Projections from 1990 to 2030  
from a Bayesian Hierarchical Modelling Study

---

**S2 APPENDIX**  
(Supplementary Figures)

Vladimíra Kantorová<sup>\*1</sup>, Mark C. Wheldon<sup>1</sup>, Aisha N. Z. Dasgupta<sup>1</sup>, Philipp Ueffing<sup>1</sup>, and Helena Cruz Castanheira<sup>2</sup>

<sup>1</sup>United Nations, Department of Economic and Social Affairs, Population Division, New York, NY, United States of America<sup>†</sup>

<sup>2</sup>United Nations, Economic Commission for Latin America and the Caribbean, Santiago de Chile, Chile<sup>†</sup>

11th December 2020

---

\*Corresponding author. Vladimíra Kantorová, Population Division, Department of Economic and Social Affairs, United Nations, [kantorova@un.org](mailto:kantorova@un.org)

<sup>†</sup>The views and opinions expressed in this paper are those of the authors and do not necessarily represent those of the United Nations. This paper has not been formally edited and cleared by the United Nations.

## Contents

|          |                                                   |          |
|----------|---------------------------------------------------|----------|
| <b>1</b> | <b>Country-Specific Estimates and Projections</b> | <b>1</b> |
| 1.1      | Unmarried Adolescent Women . . . . .              | 1        |
| 1.2      | Married Adolescent Women . . . . .                | 88       |
| 1.3      | All Adolescent Women . . . . .                    | 219      |

## 1 Country-Specific Estimates and Projections of Family-Planning Indicators

These figures contain a systematic and comprehensive set of annual, model-based estimates and projections, and underlying survey-based observations, for a collection of family planning indicators, including contraceptive prevalence, the unmet need for family planning, and the demand for family planning satisfied by use of contraception (any method or modern methods alone). They pertain to the population of adolescent women aged 15–19 years.

The results pertain to adolescent women aged 15–19 years who are unmarried and not in a union ('unmarried'), married or in a union ('married'), and all adolescent women aged 15–19. They cover the period from 1970 to 2030. Estimates based on medians, as well as 80 per cent uncertainty intervals (represented by lines) and 95 per cent uncertainty intervals (represented by shaded areas), are provided for 185 countries or areas. The results are based on data available as of February 2019.

*Note:* The designations employed and the material presented in this publication do not imply the expression of any opinion whatsoever on the part of the Secretariat of the United Nations concerning the legal status of any country, territory or area or of its authorities, or concerning the delimitation of its frontiers or boundaries. The term "country" as used in this publication also refers, as appropriate, to territories or areas. Countries or areas listed individually are only those with 90,000 inhabitants or more in 2017 and ; the rest are included in the aggregates but are not listed separately.

### 1.1 Unmarried Adolescent Women

Albania (Southern Europe, SA Group 1) --- Unmarried / Not In-Union

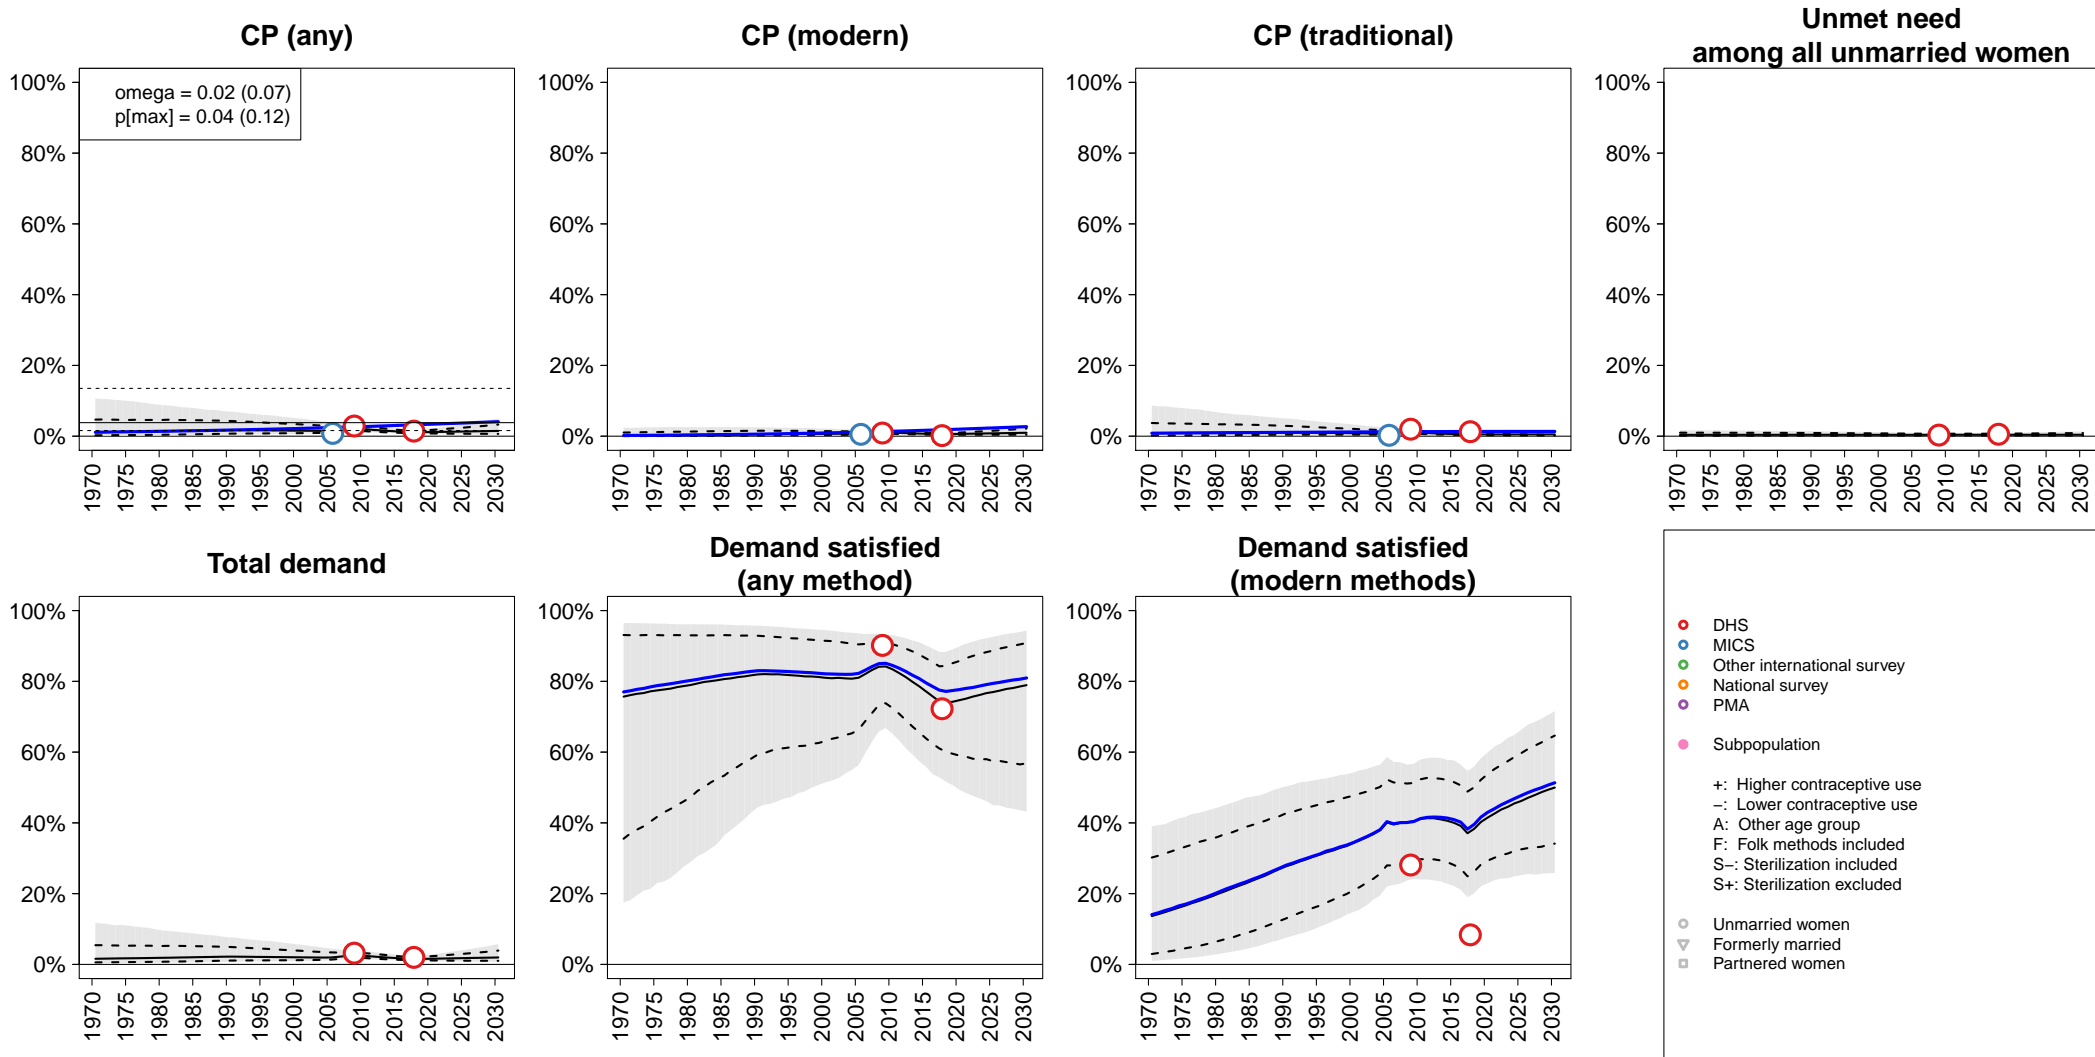



Angola (Middle Africa, SA Group 1) --- Unmarried / Not In-Union

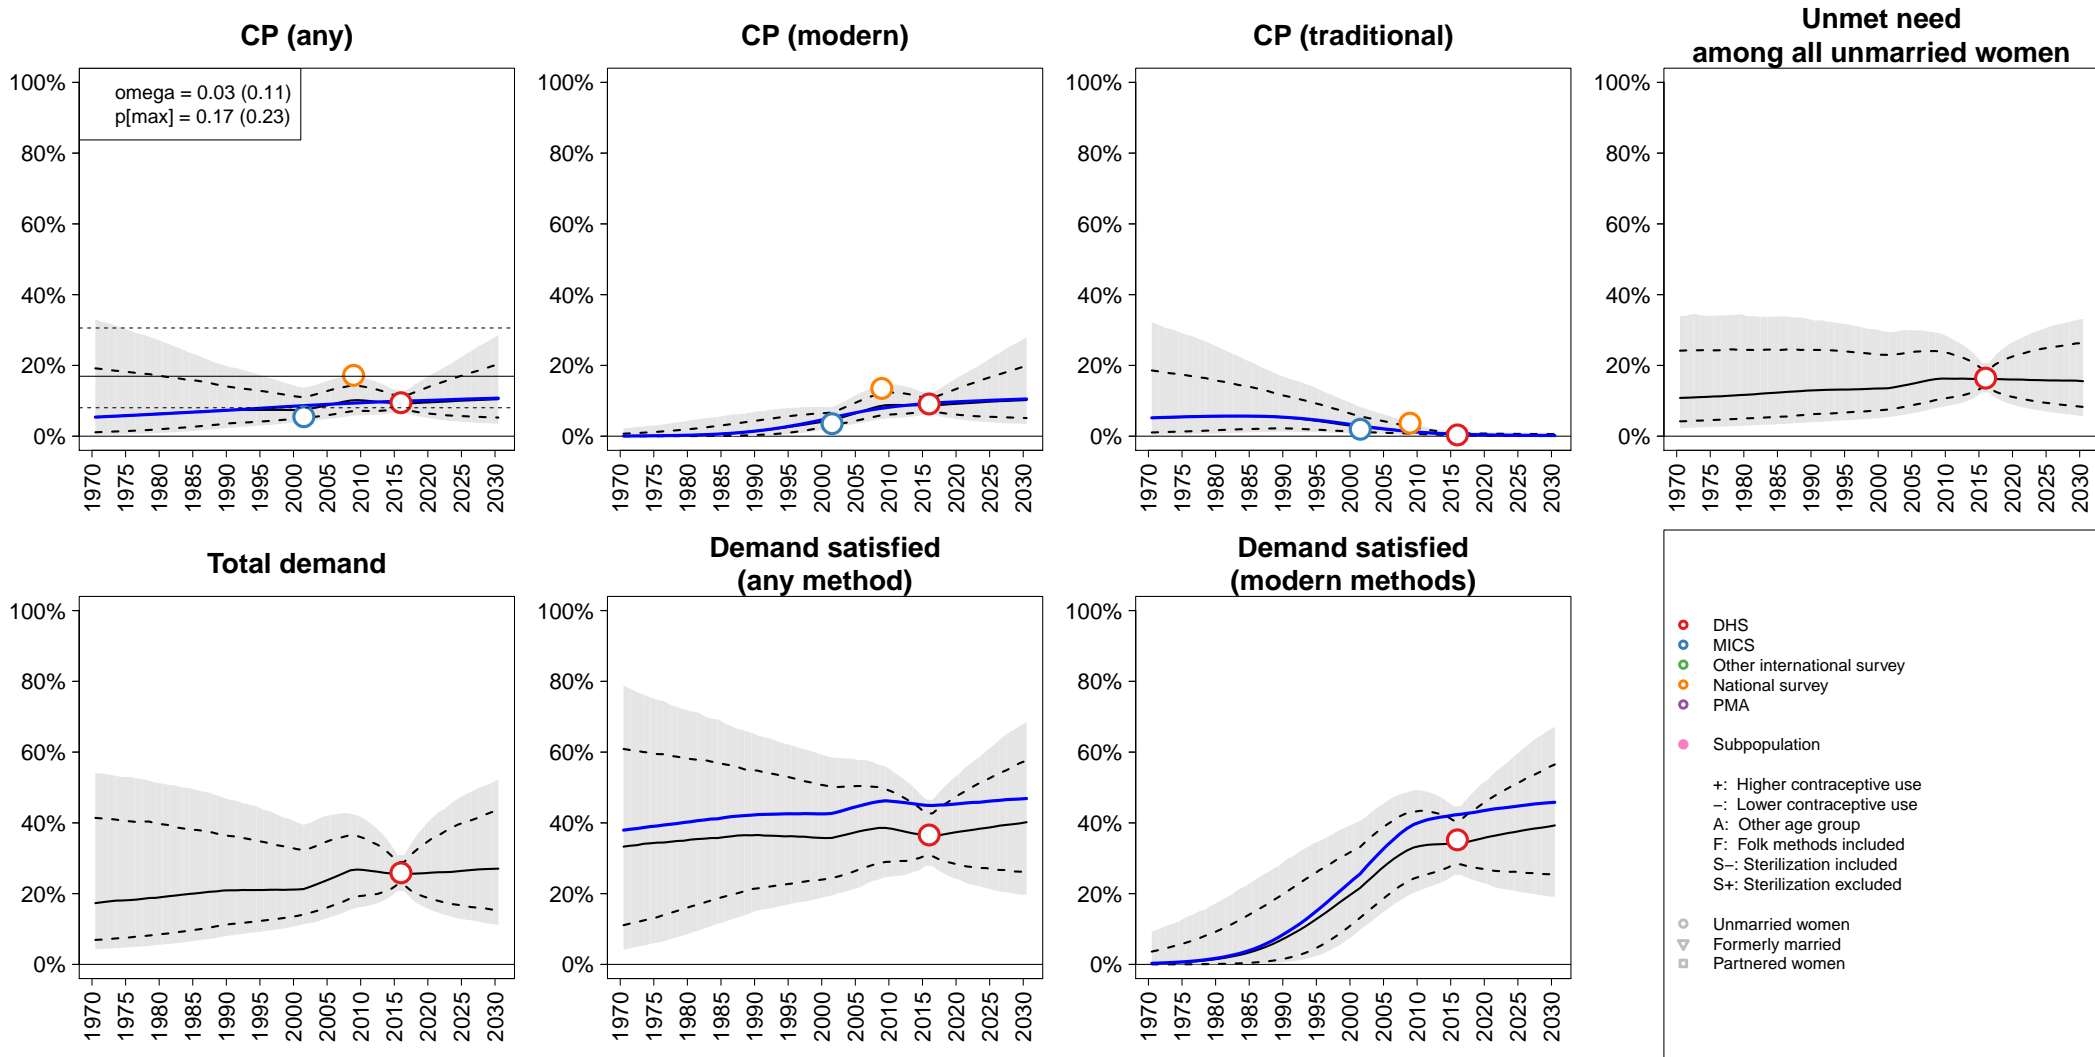

Armenia (Western Asia, SA Group 0) --- Unmarried / Not In-Union

CP (any)

CP (modern)

CP (traditional)

Unmet need among all unmarried women

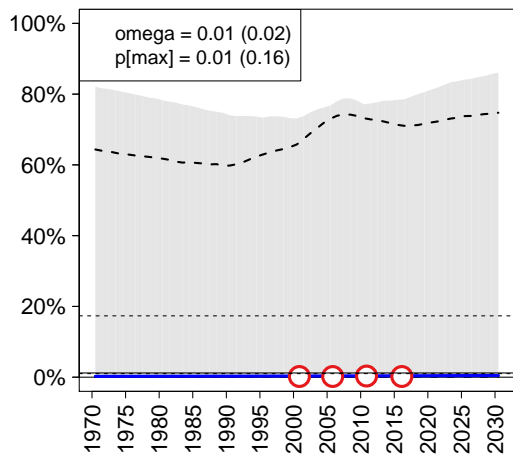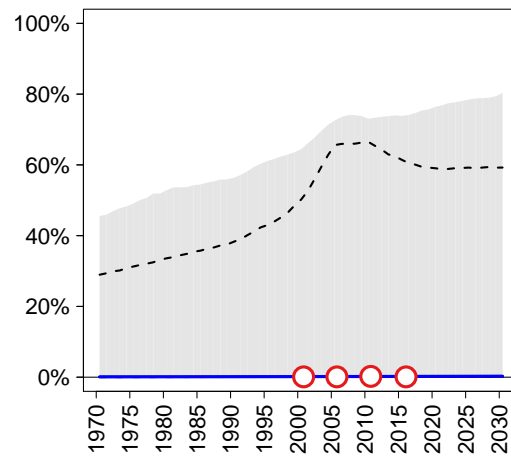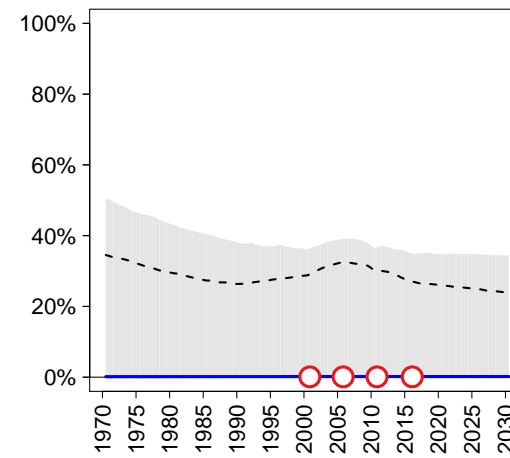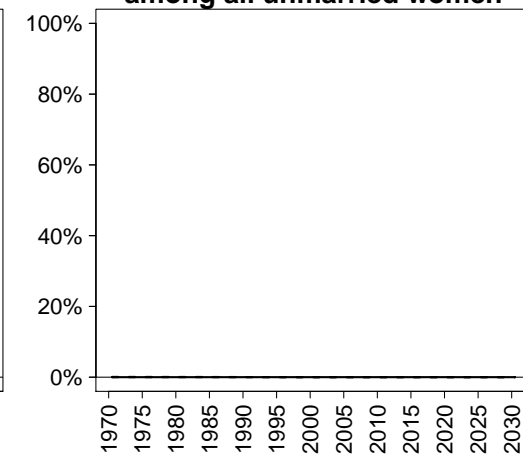

Total demand

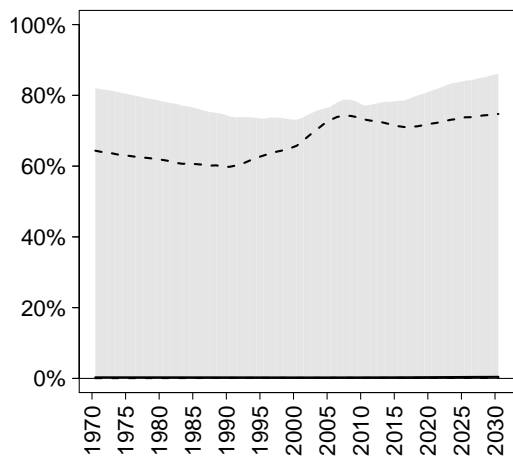

- DHS
- MICS
- Other international survey
- National survey
- PMA
- Subpopulation
- +: Higher contraceptive use
- : Lower contraceptive use
- A: Other age group
- F: Folk methods included
- S-: Sterilization included
- S+: Sterilization excluded
- Unmarried women
- ▽ Formerly married
- ▣ Partnered women

Barbados (Caribbean, SA Group 1) --- Unmarried / Not In-Union

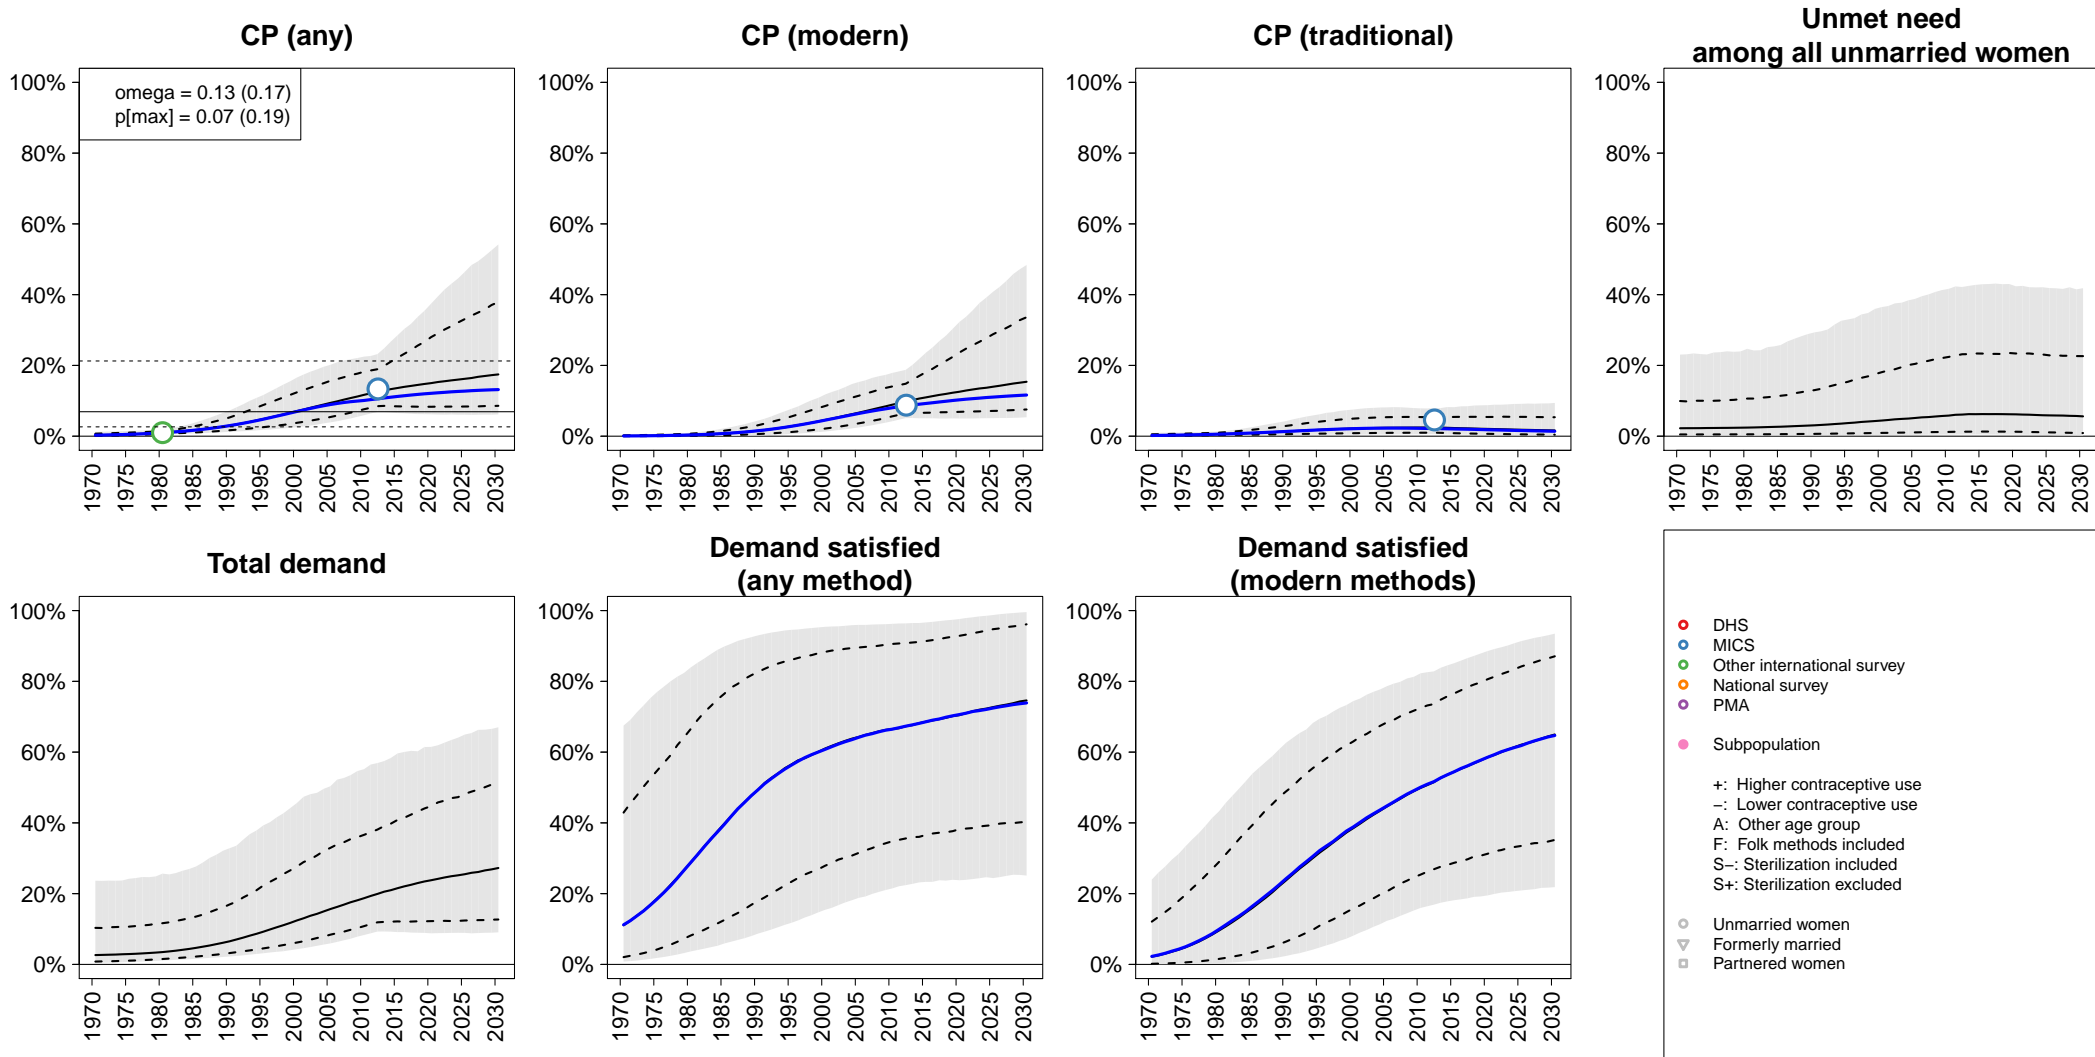

Belarus (Eastern Europe, SA Group 1) --- Unmarried / Not In-Union

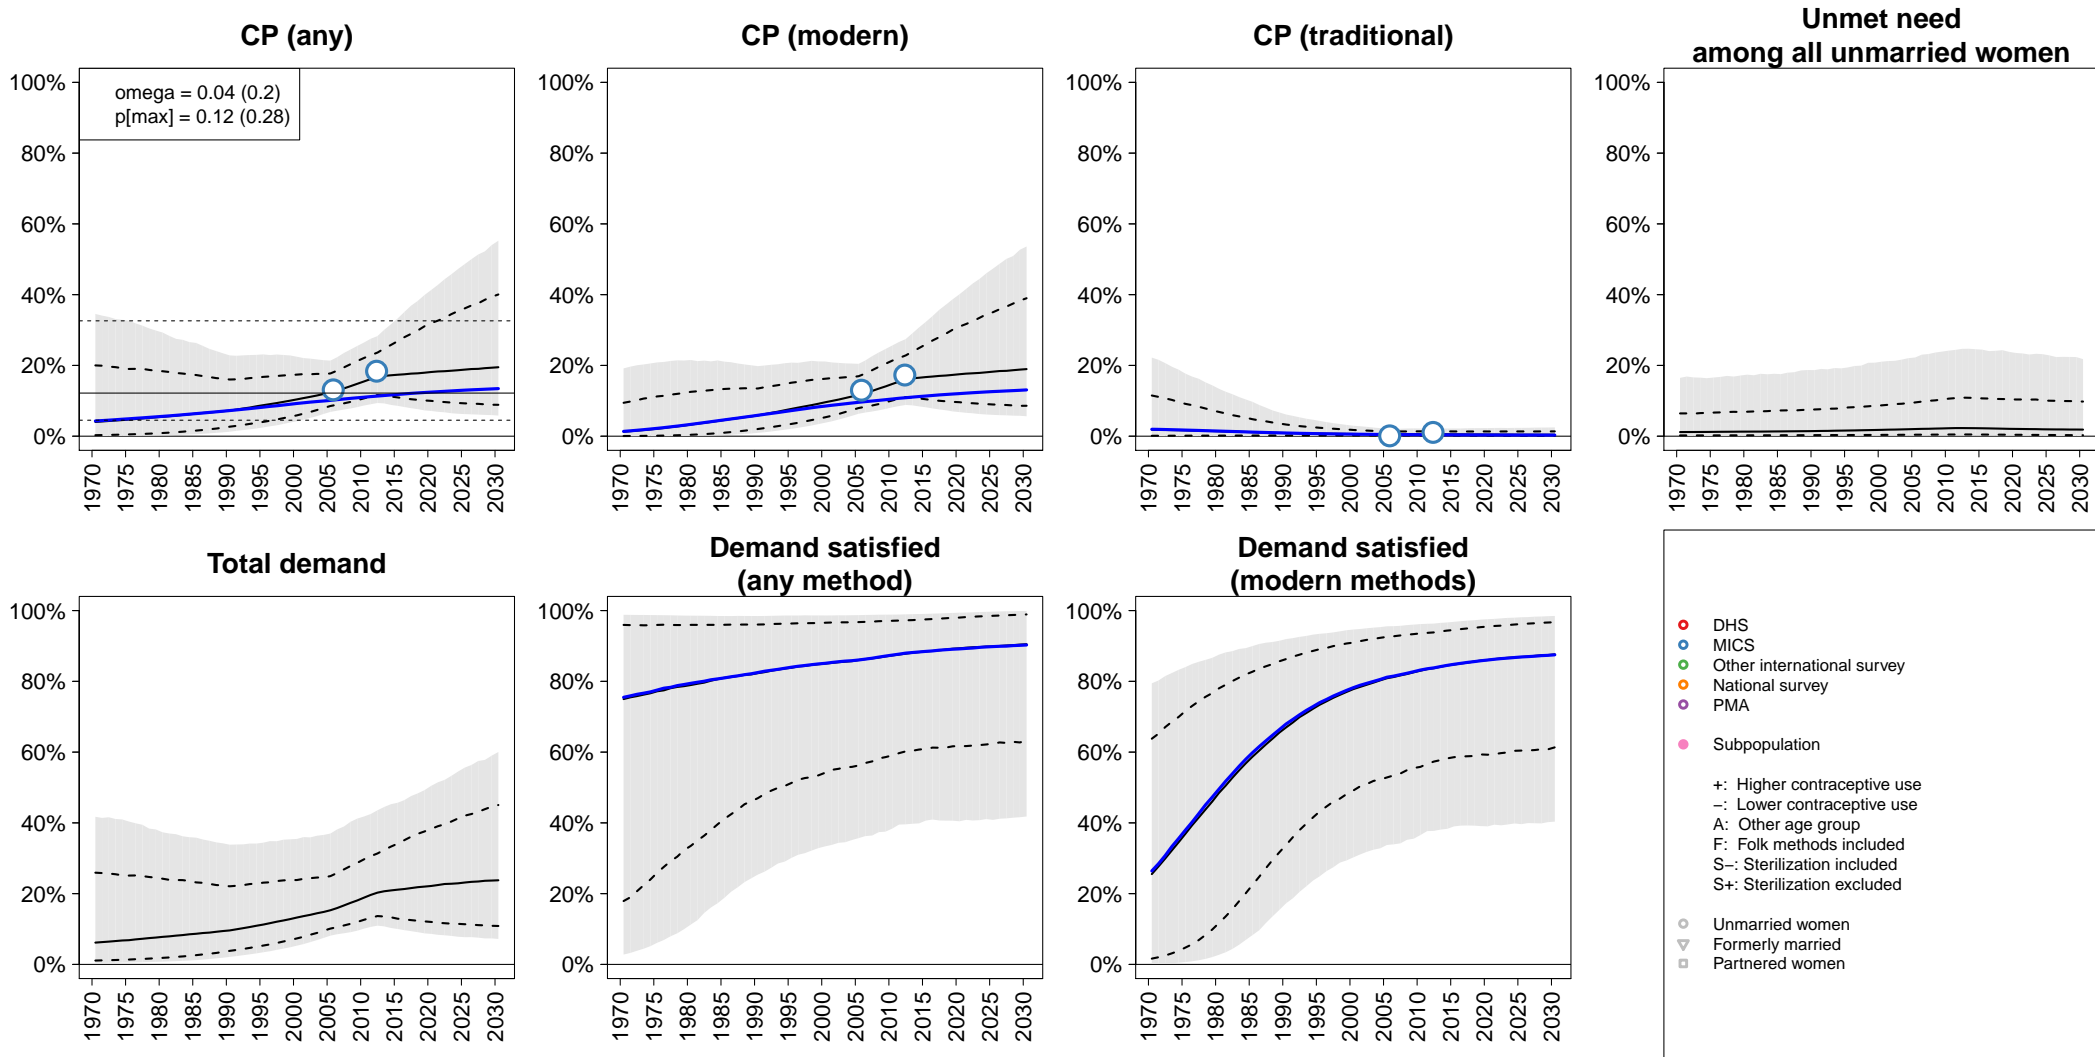

Benin (Western Africa, SA Group 1) --- Unmarried / Not In-Union

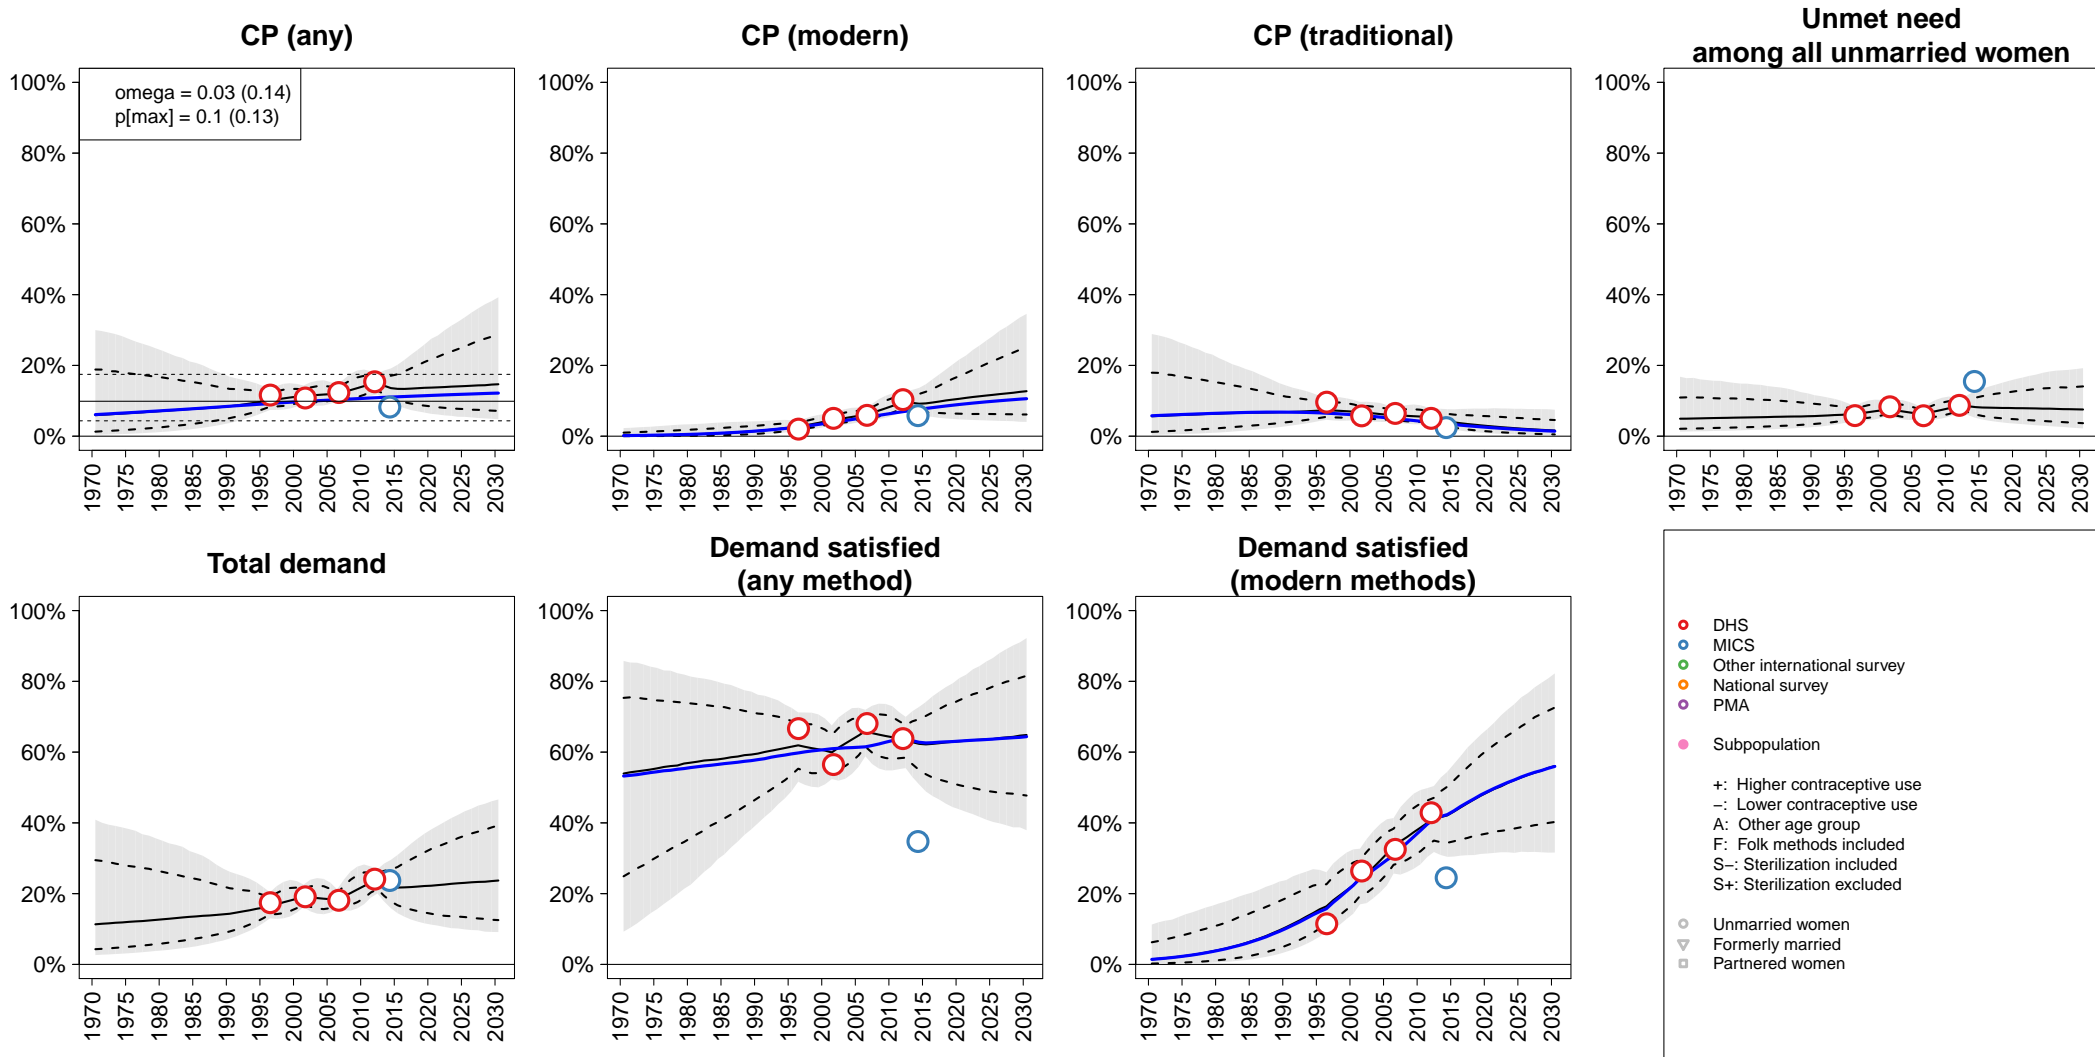

Bolivia, Plurinational State of (South America, SA Group 1) --- Unmarried / Not In-Union

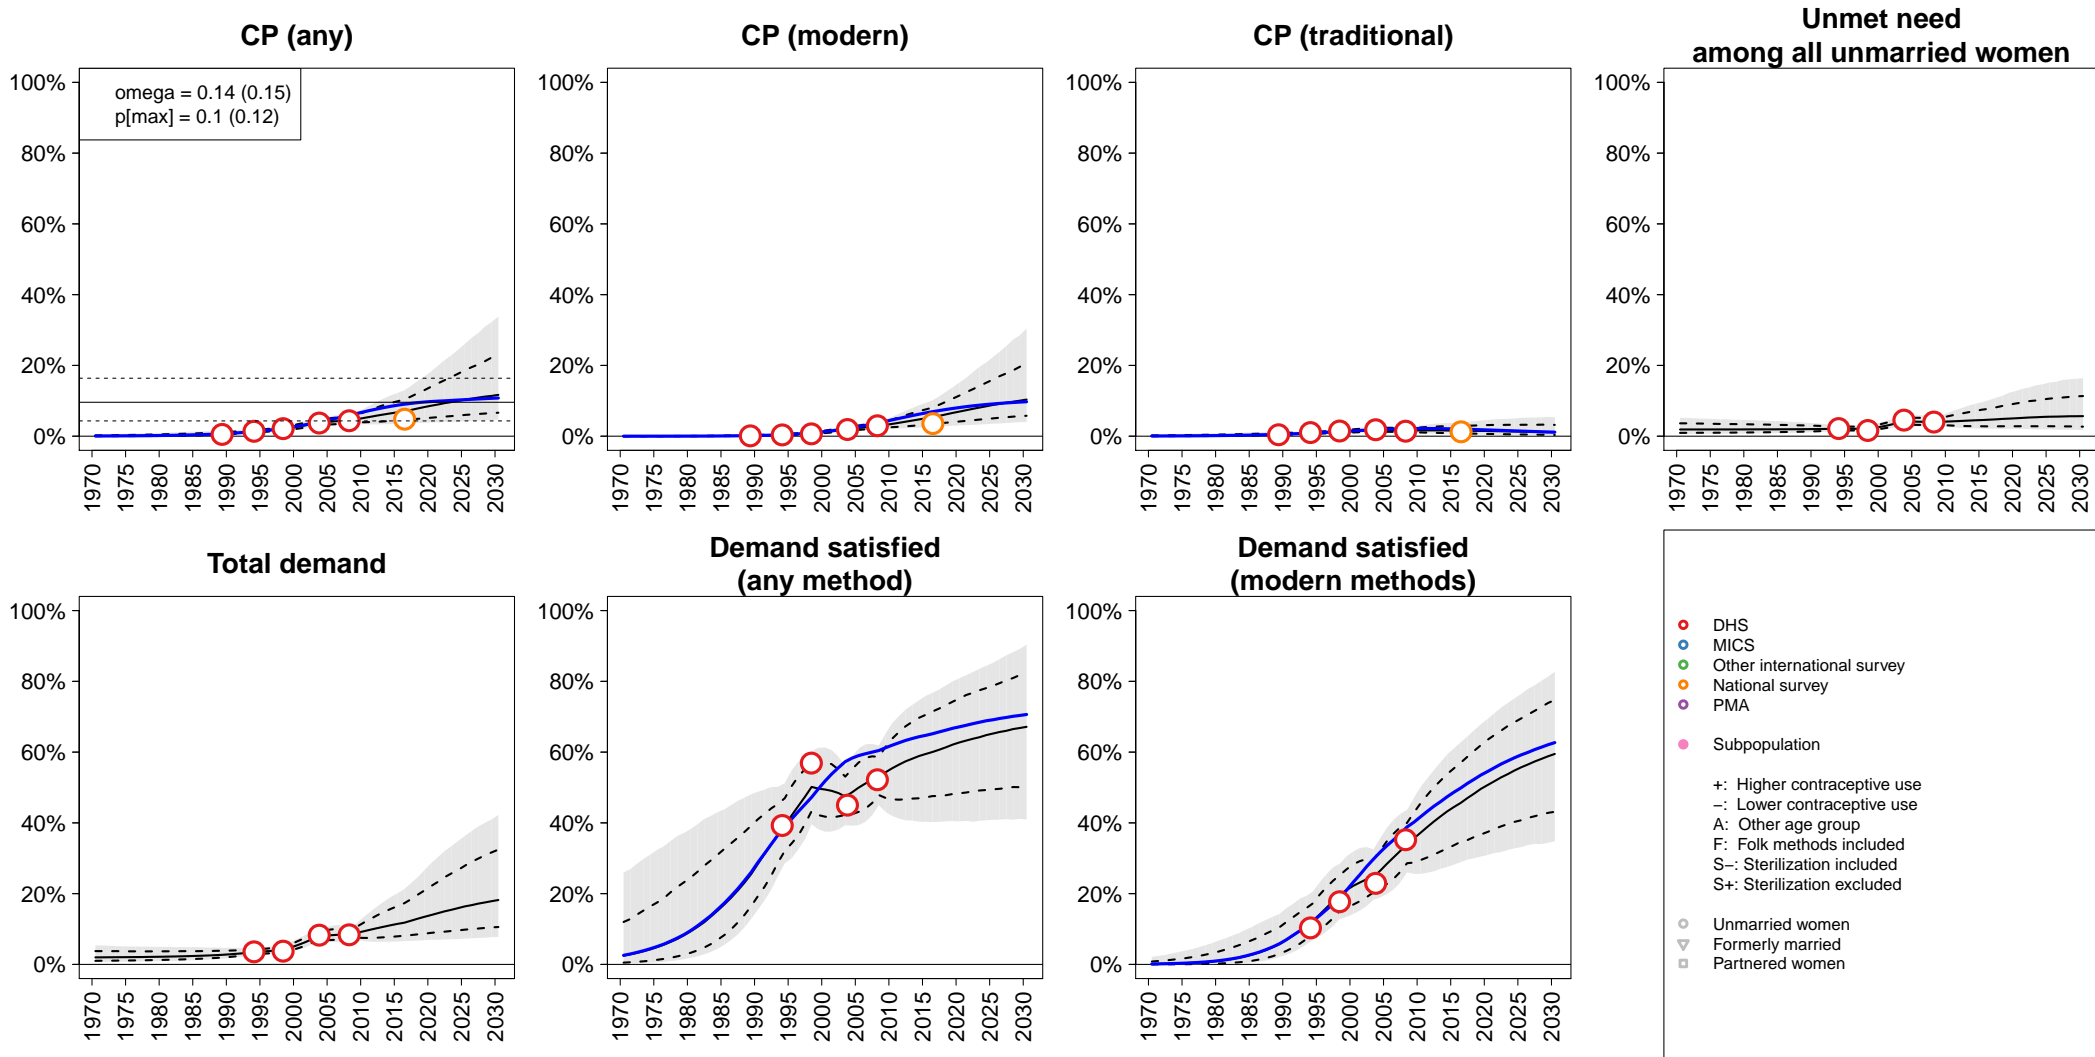

Bosnia and Herzegovina (Southern Europe, SA Group 1) --- Unmarried / Not In-Union

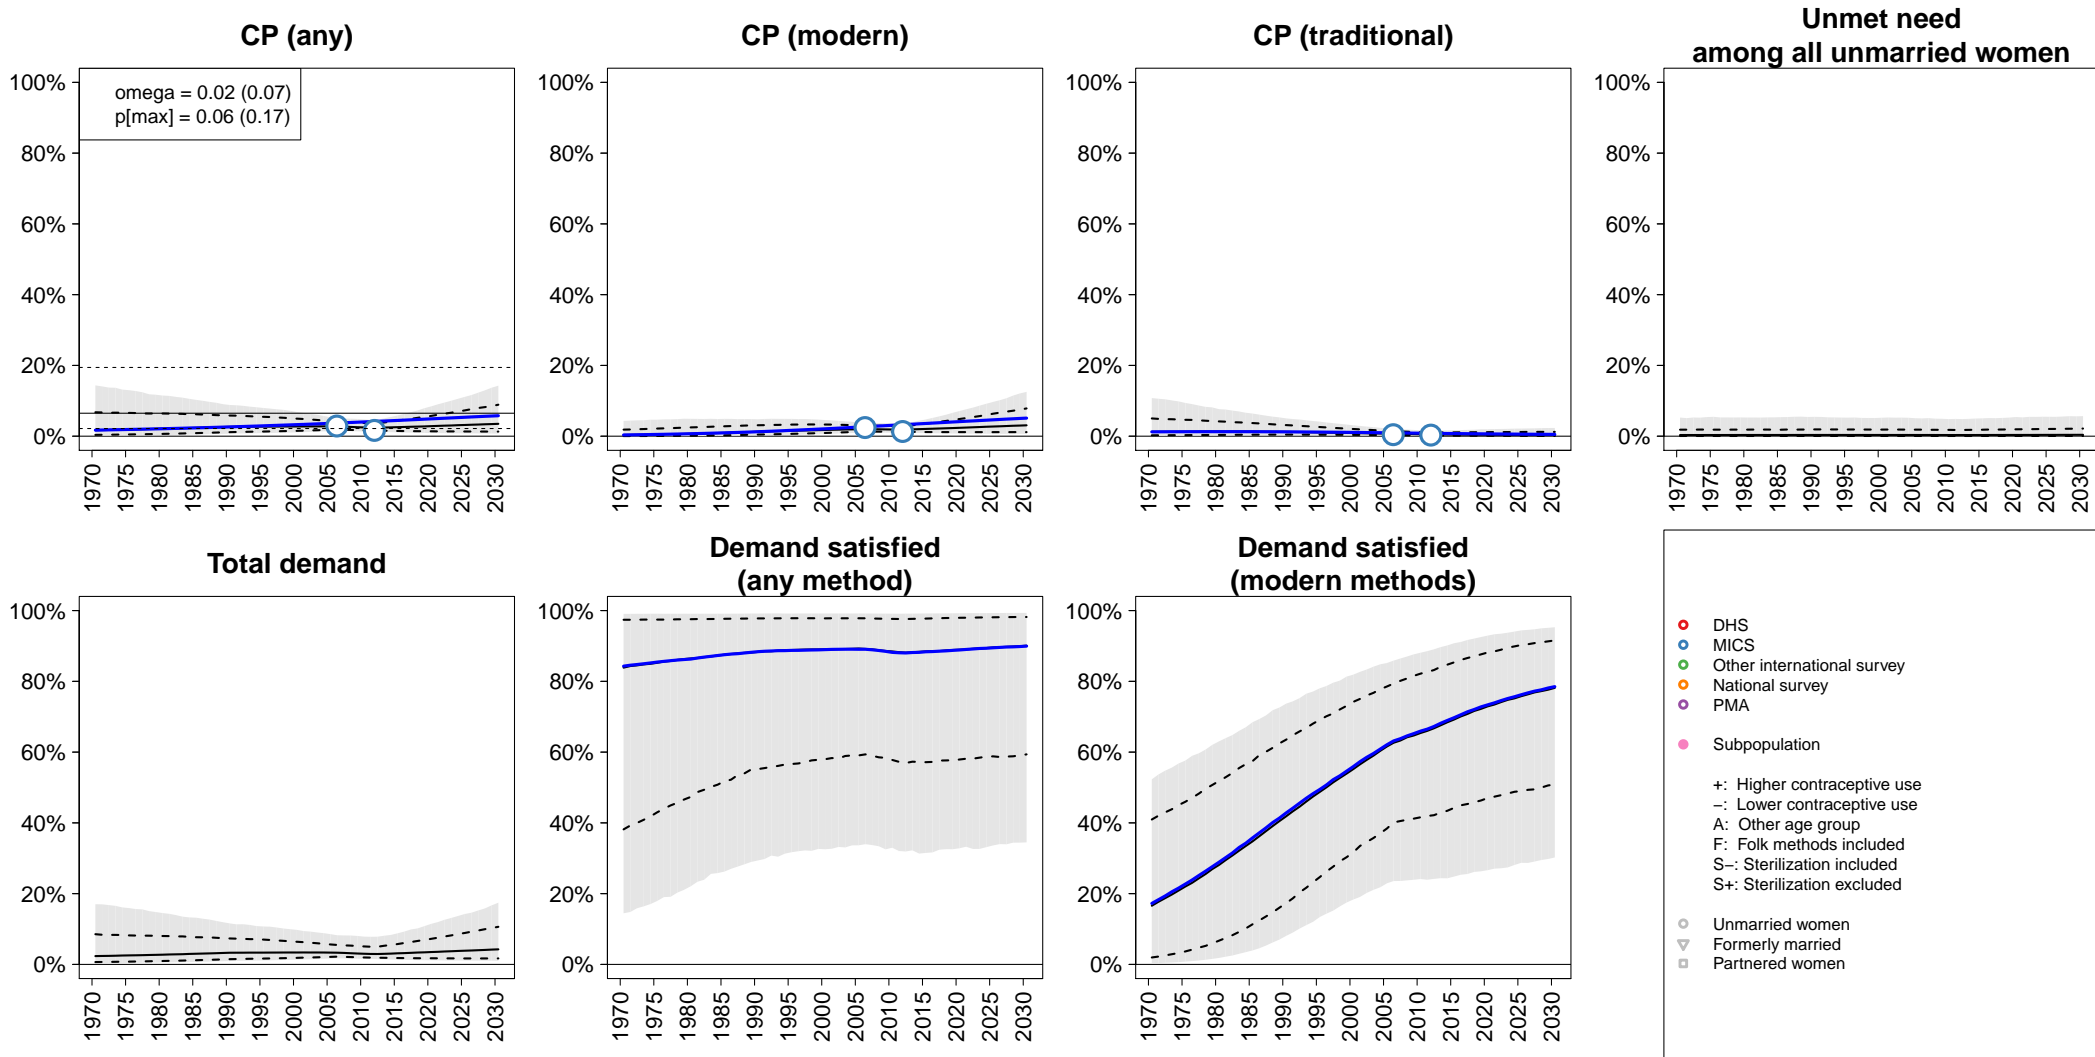

Brazil (South America, SA Group 1) --- Unmarried / Not In-Union

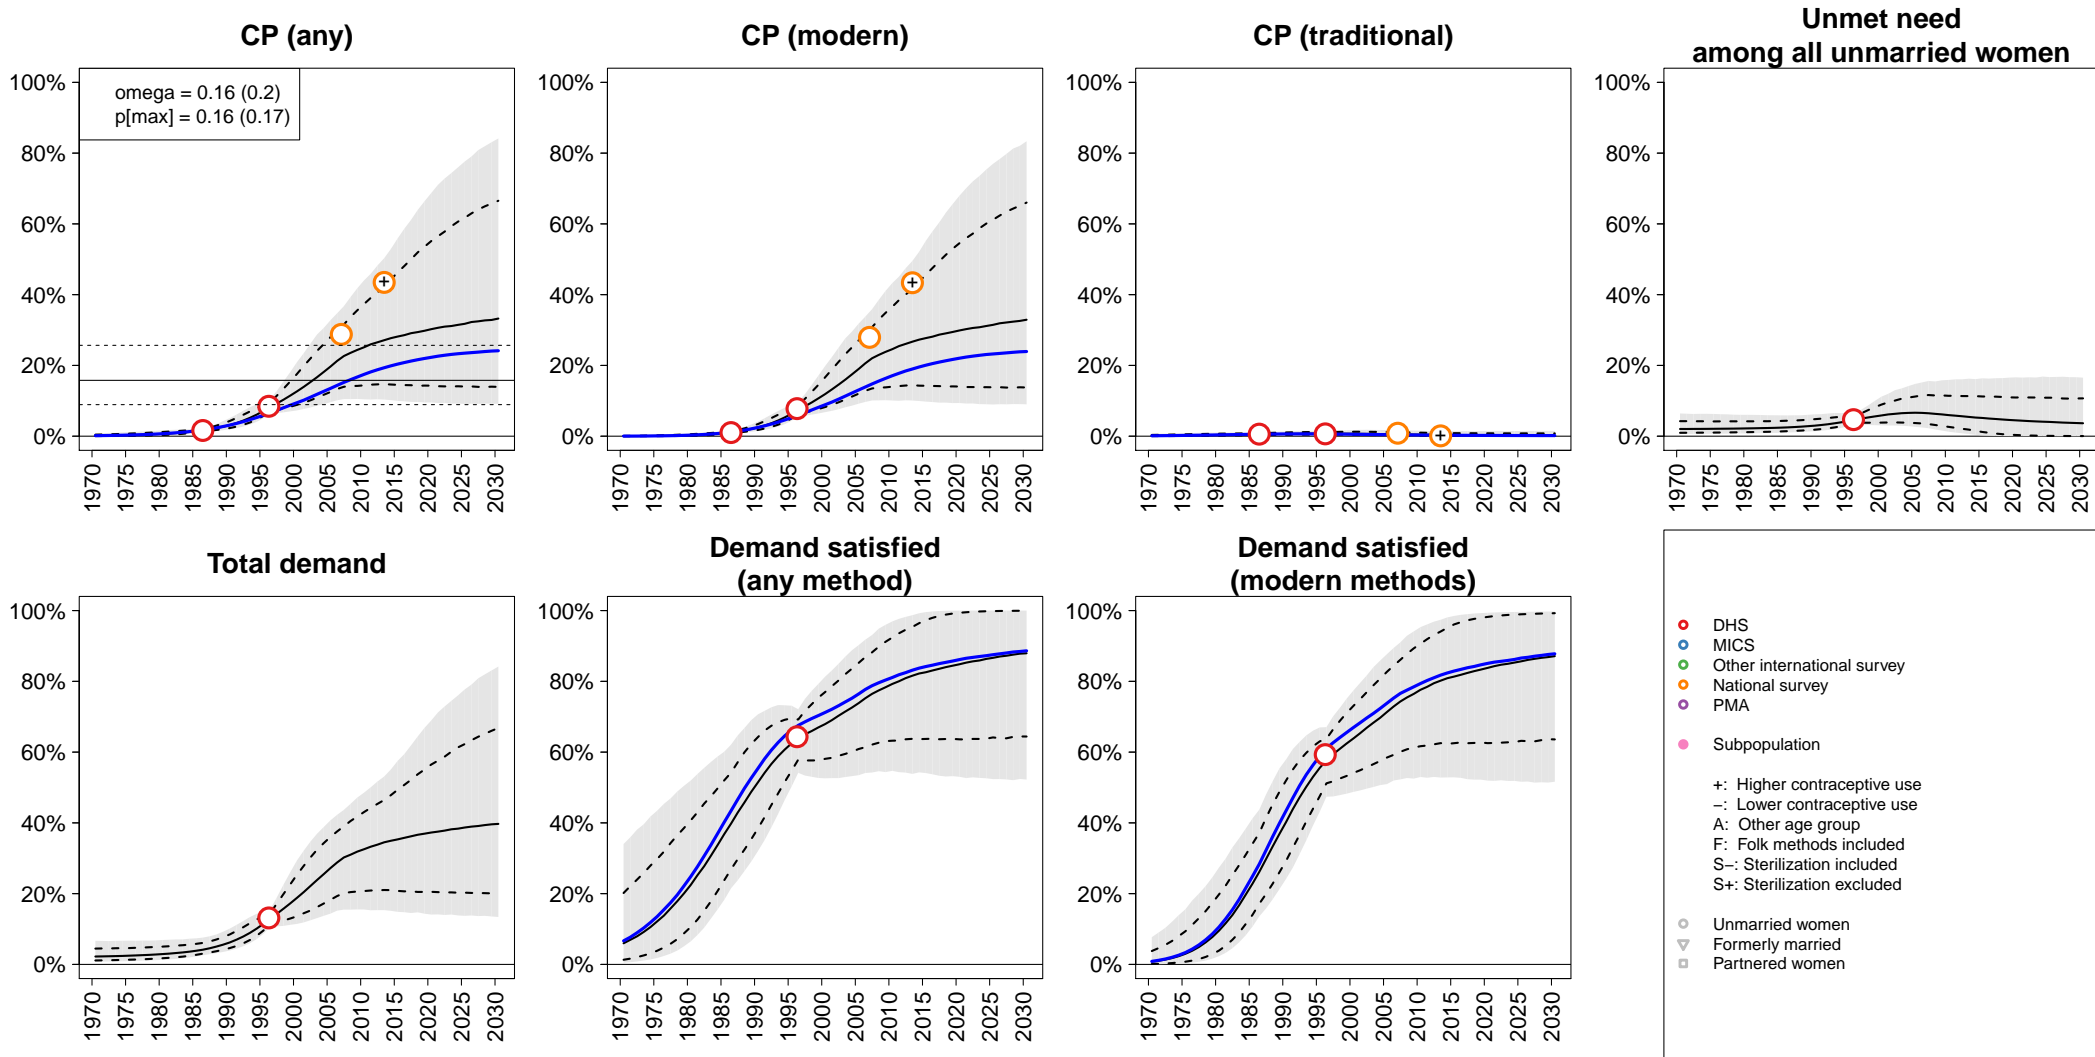



Burkina Faso (Western Africa, SA Group 1) --- Unmarried / Not In-Union

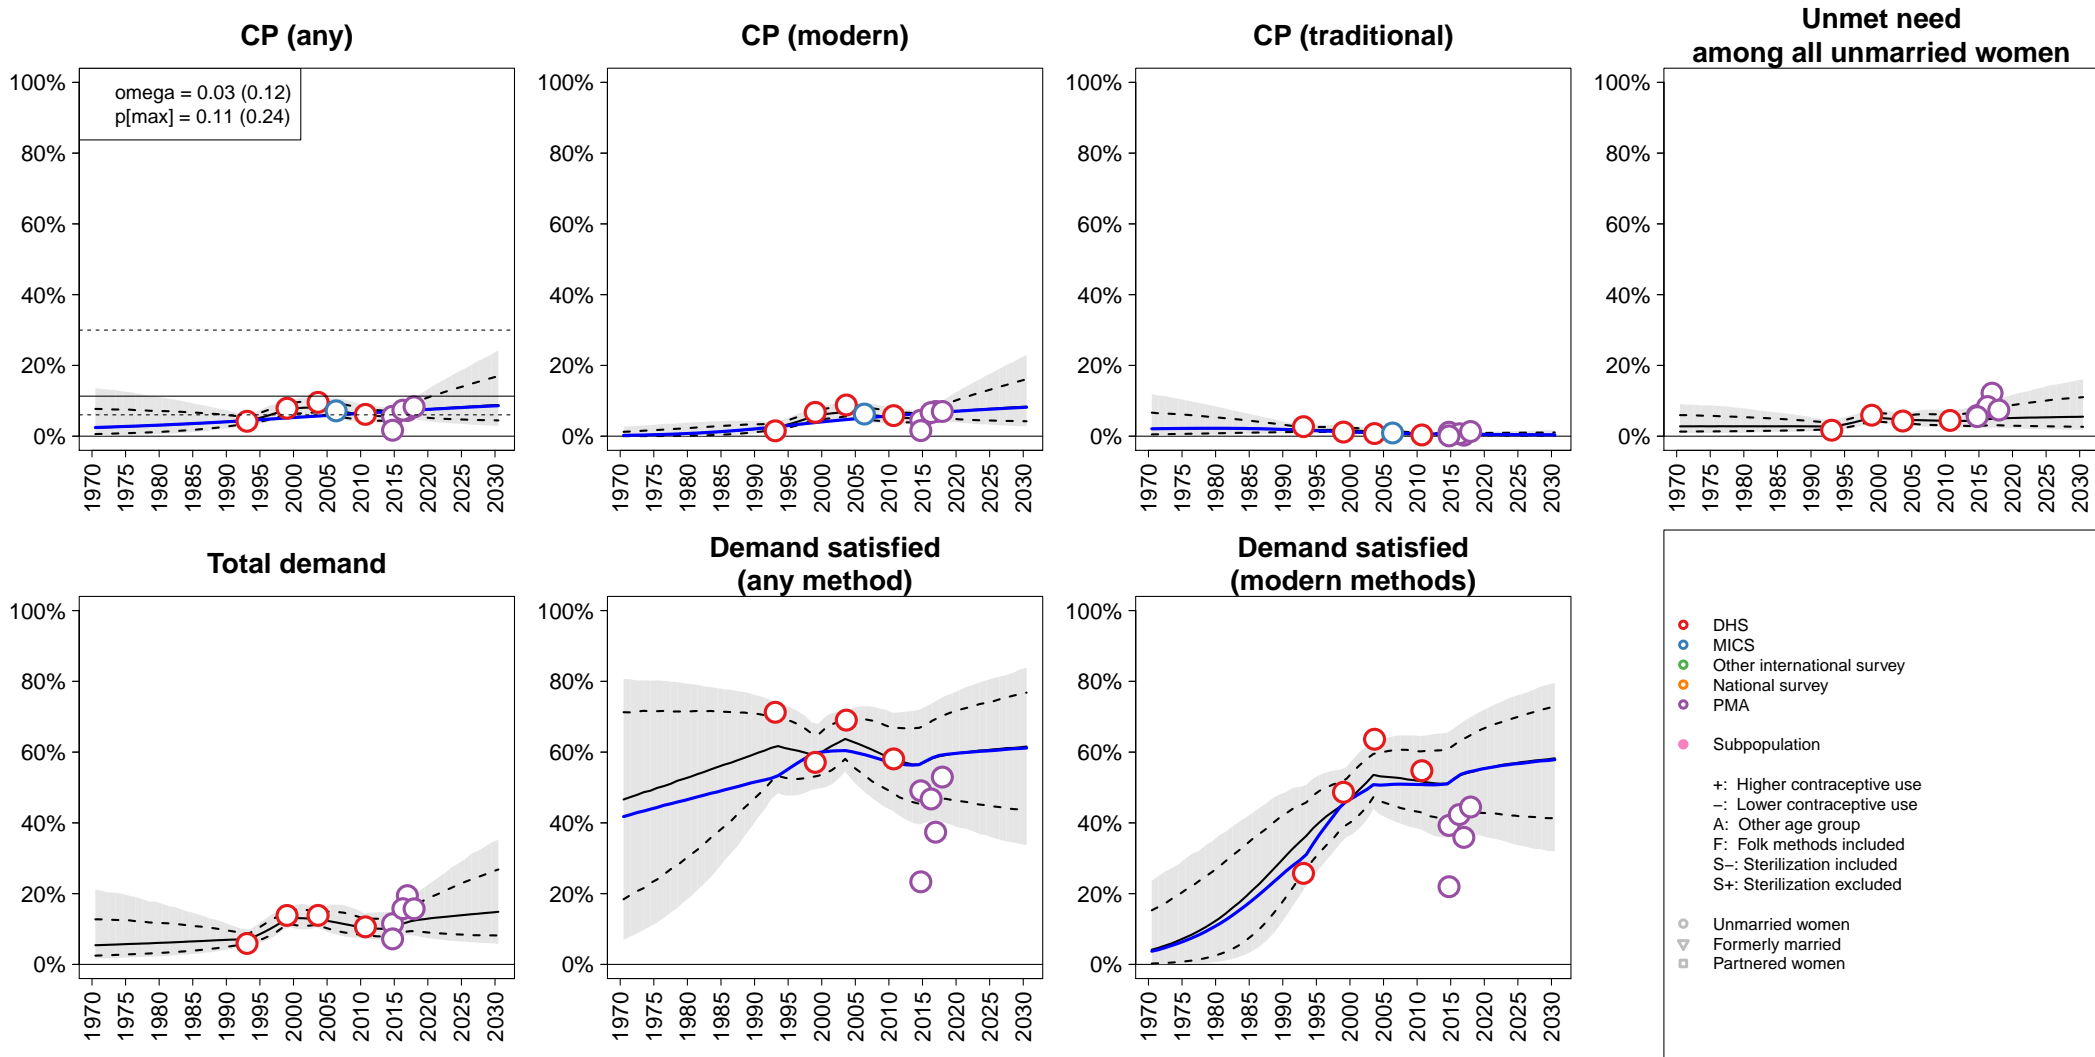

Burundi (Eastern Africa, SA Group 1) --- Unmarried / Not In-Union

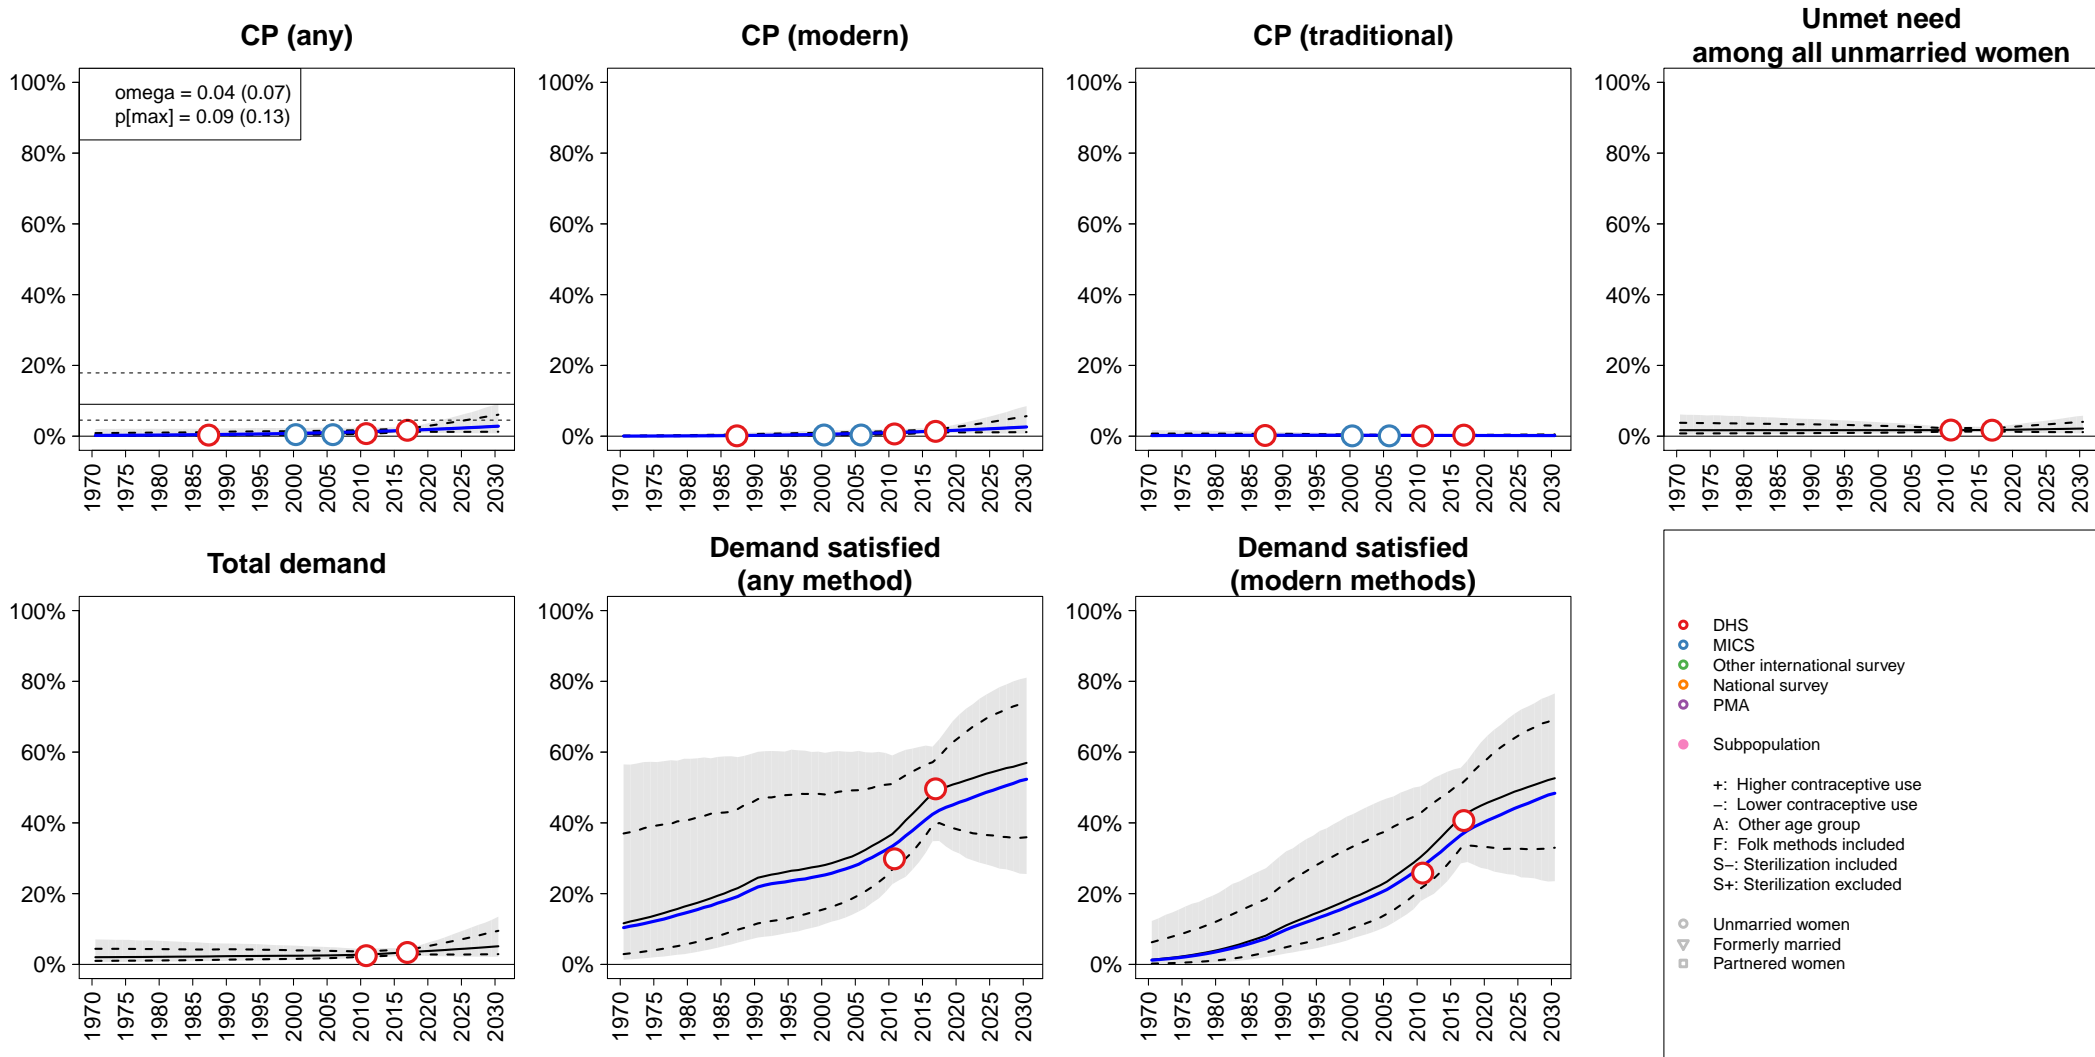

Cabo Verde (Western Africa, SA Group 1) --- Unmarried / Not In-Union

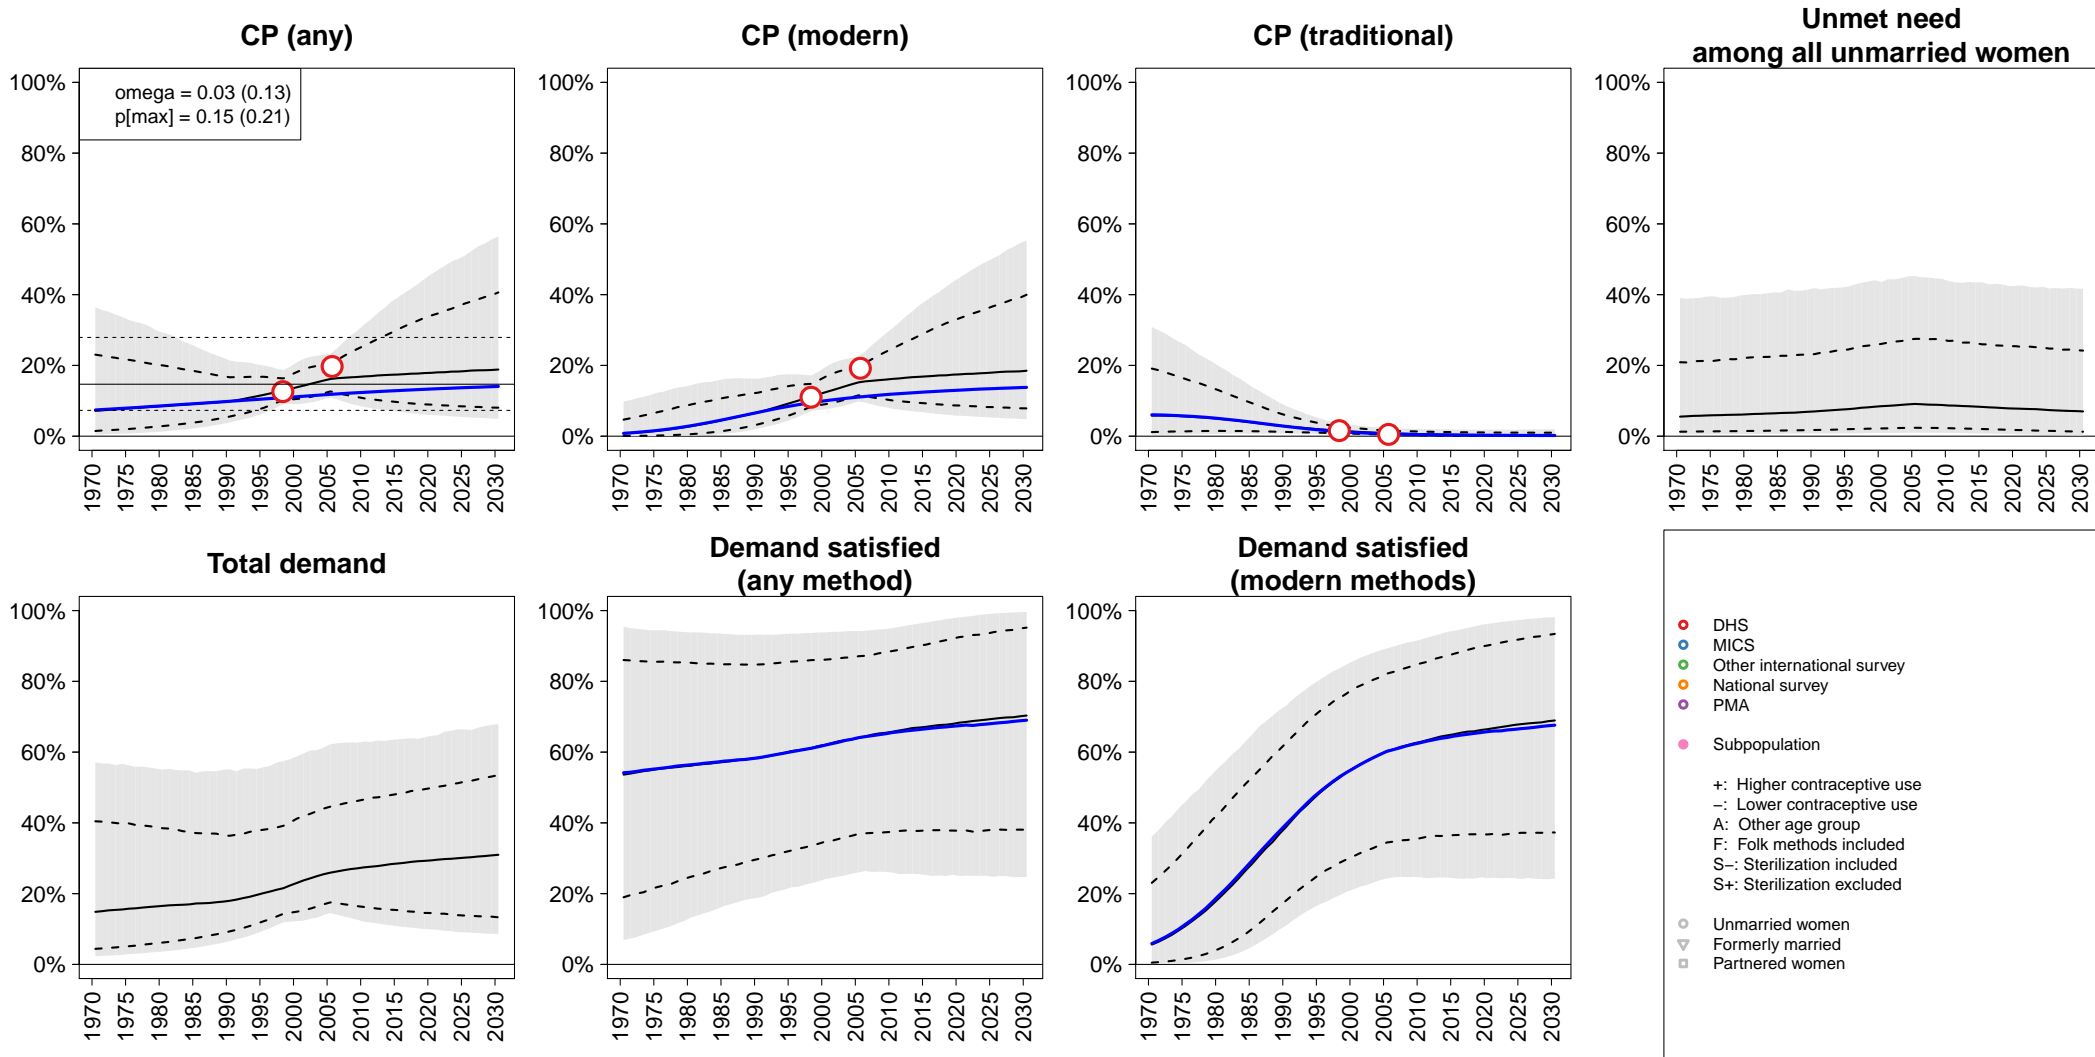

Cambodia (South-eastern Asia, SA Group 0) --- Unmarried / Not In-Union

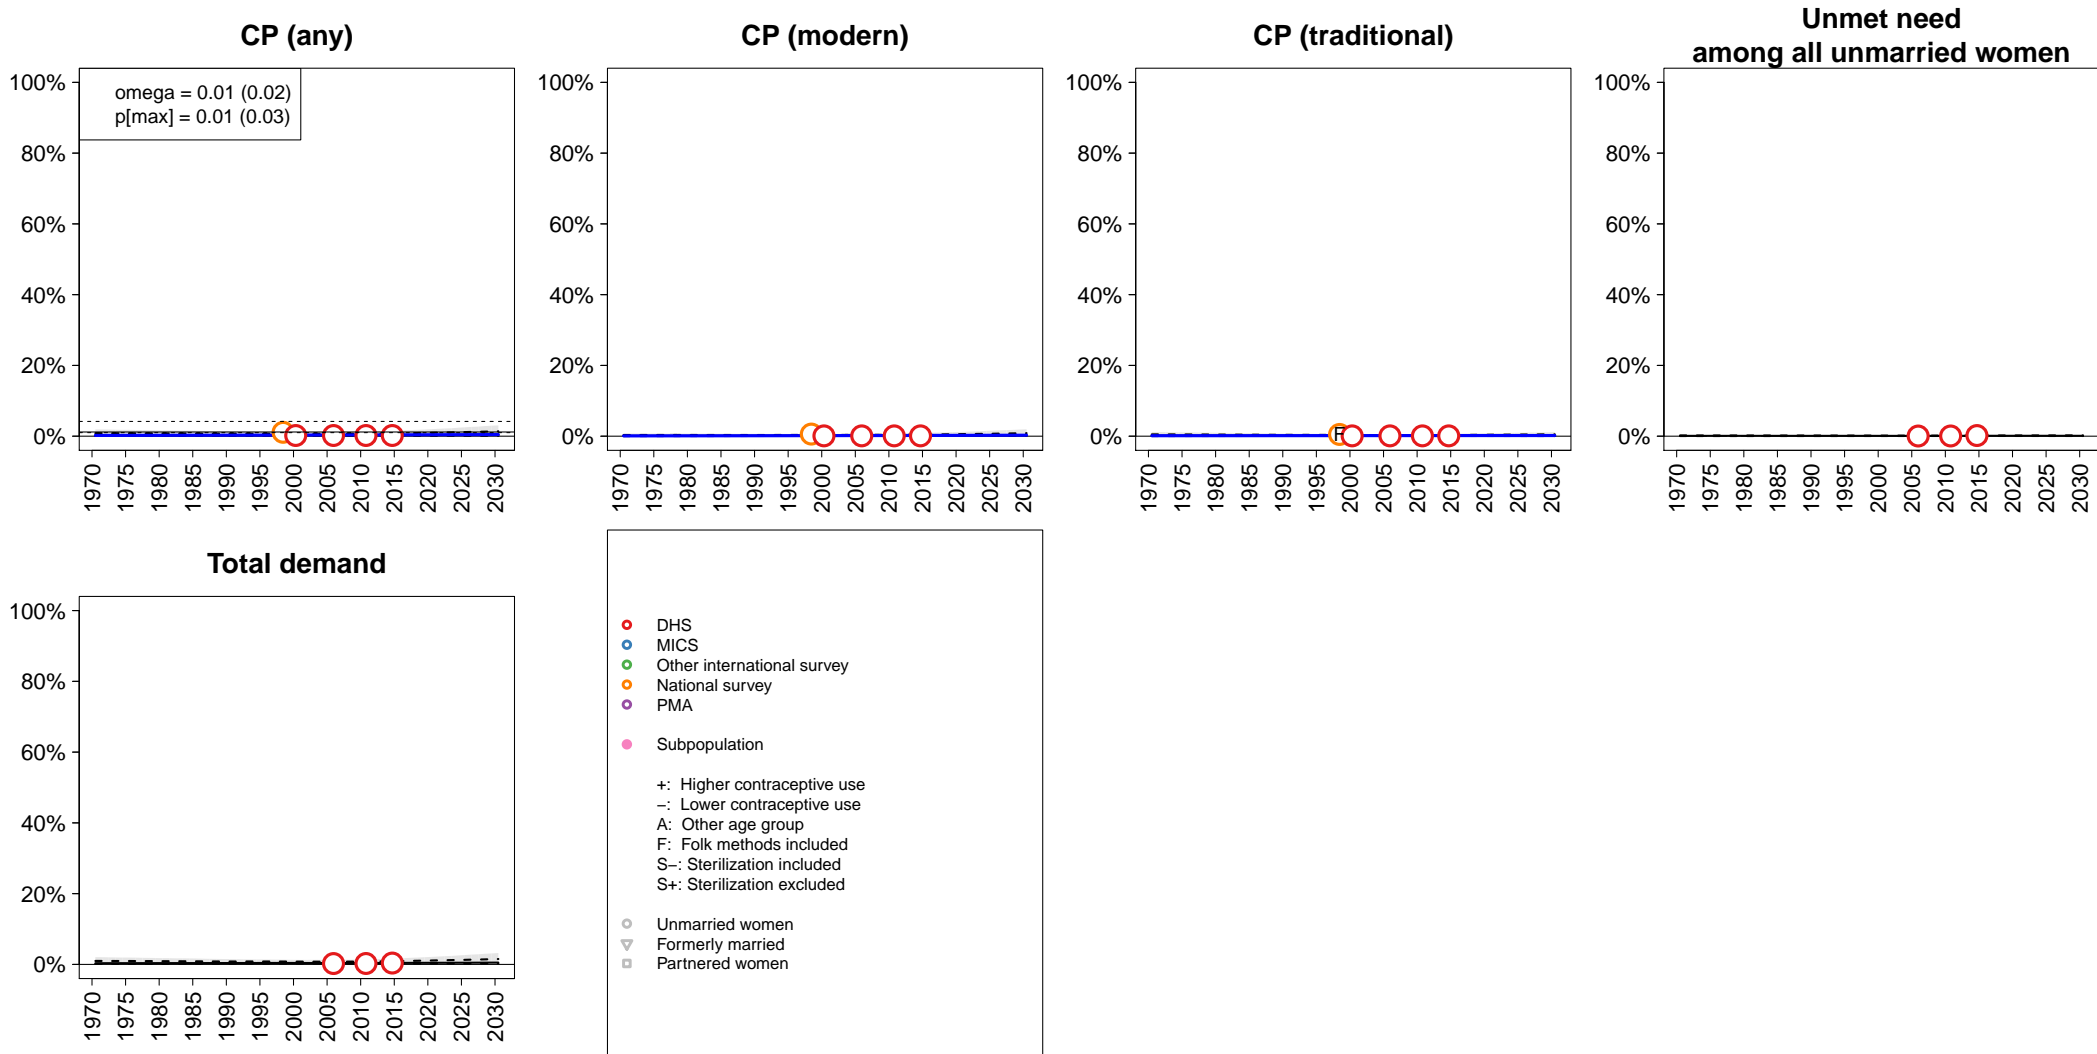

Cameroon (Middle Africa, SA Group 1) --- Unmarried / Not In-Union

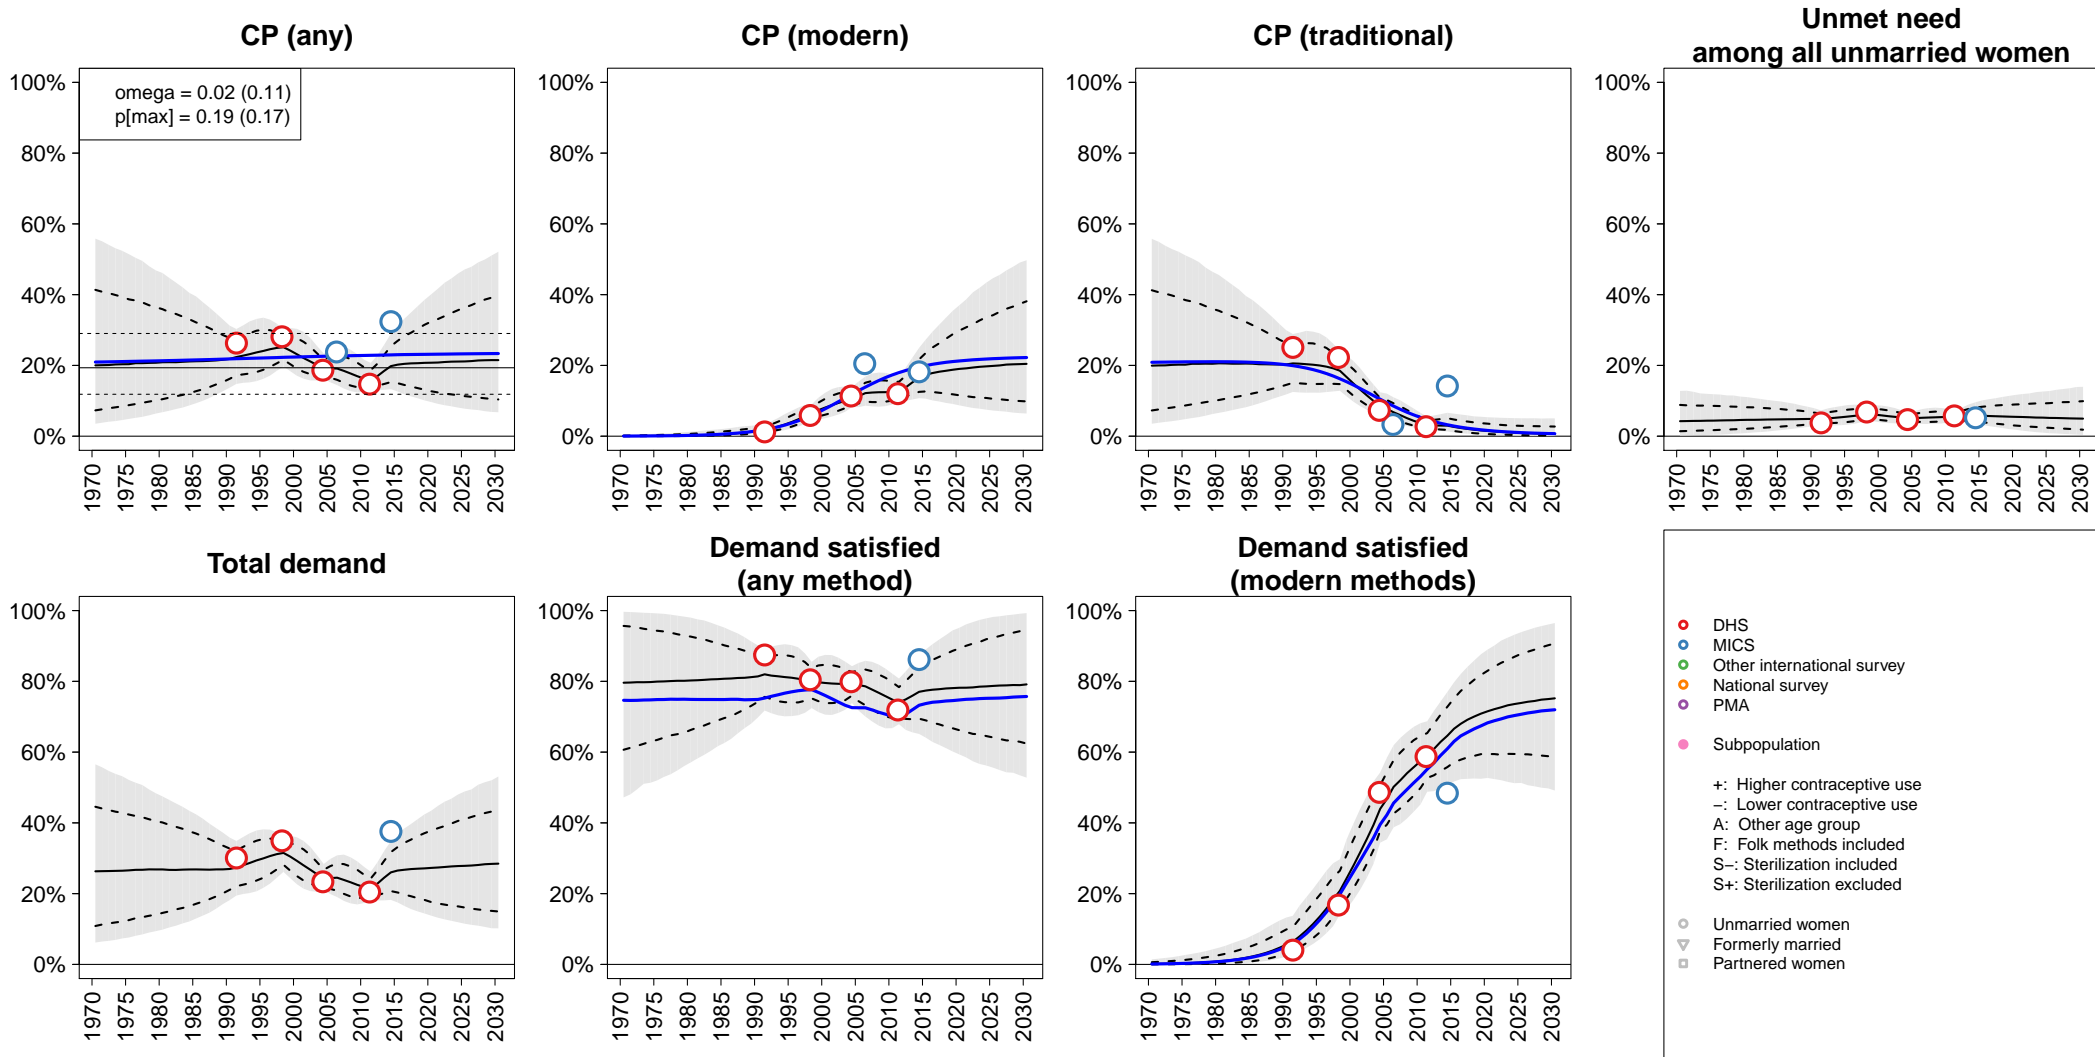

Central African Republic (Middle Africa, SA Group 1) --- Unmarried / Not In-Union

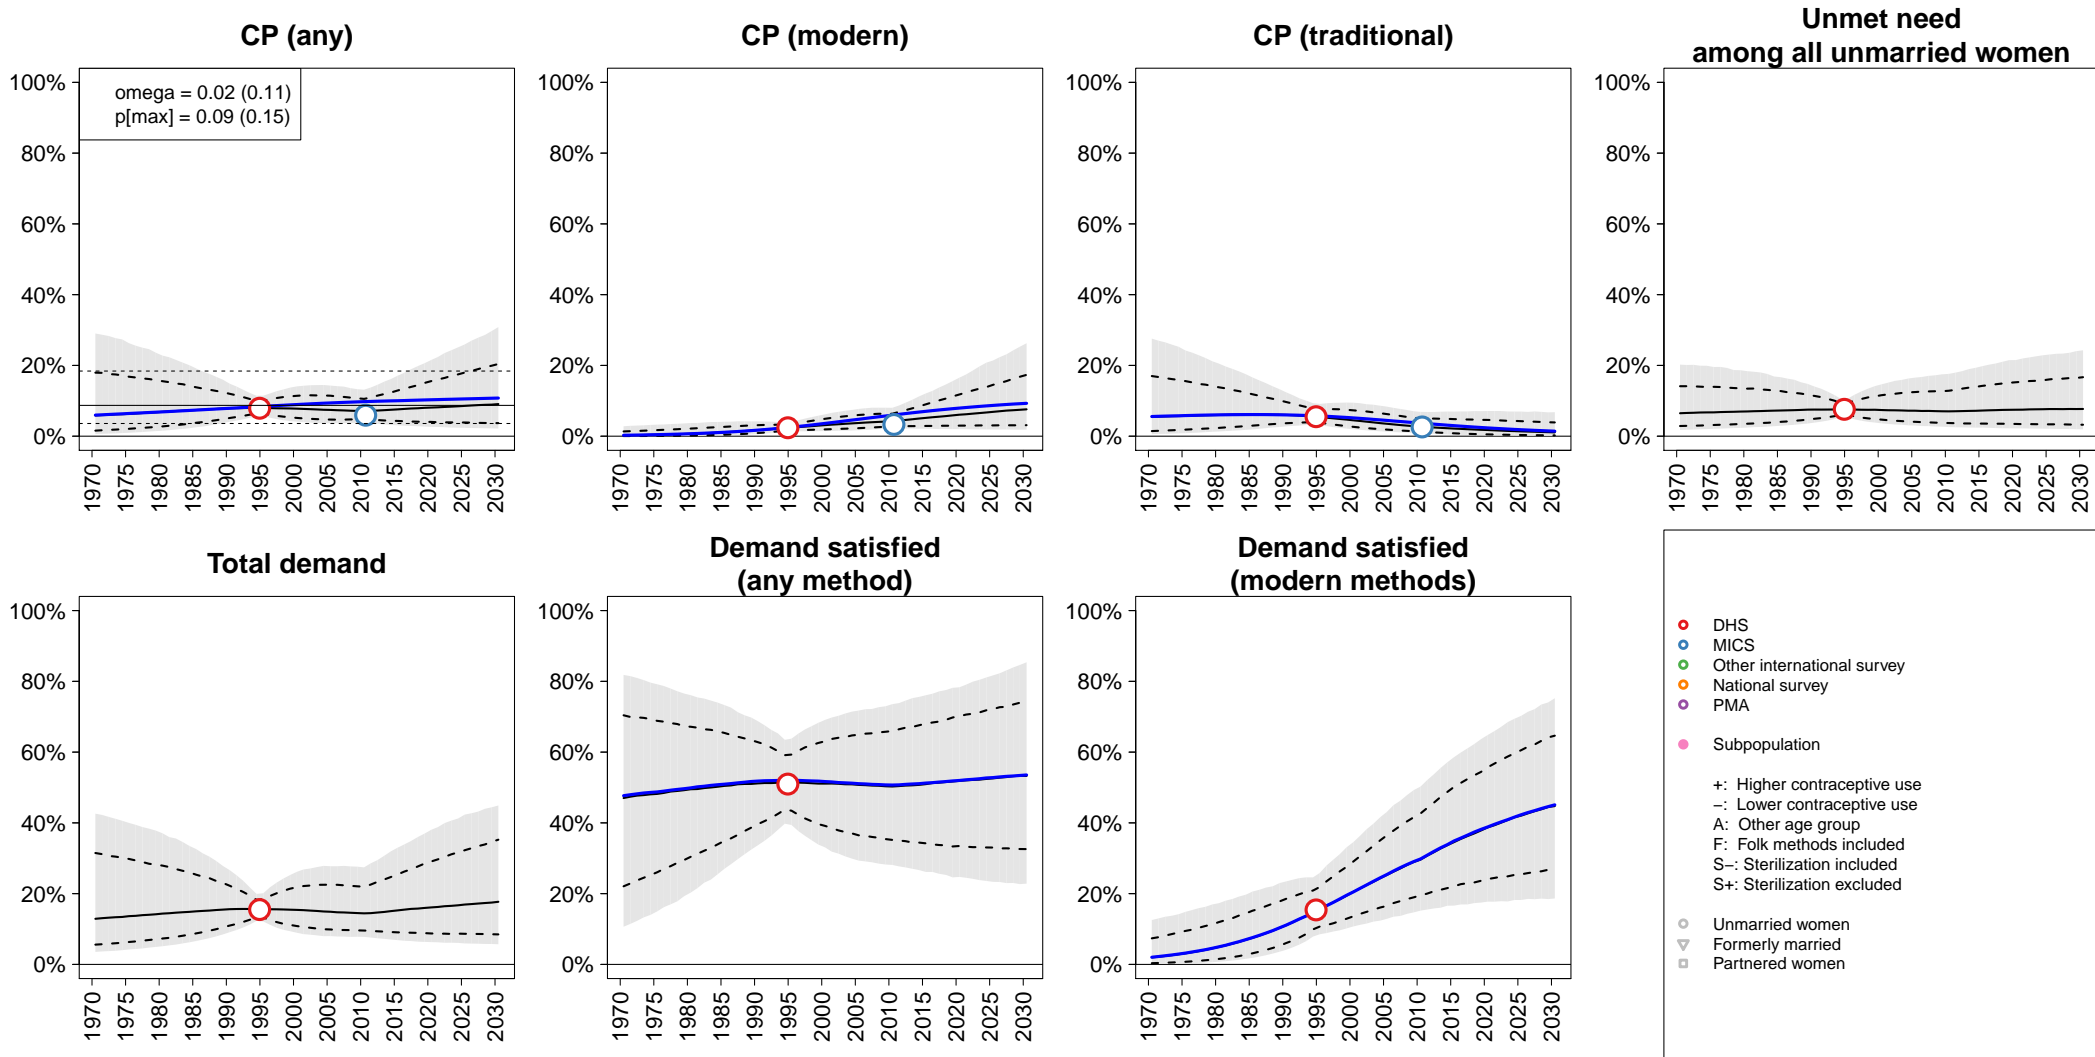

Chad (Middle Africa, SA Group 1) --- Unmarried / Not In-Union

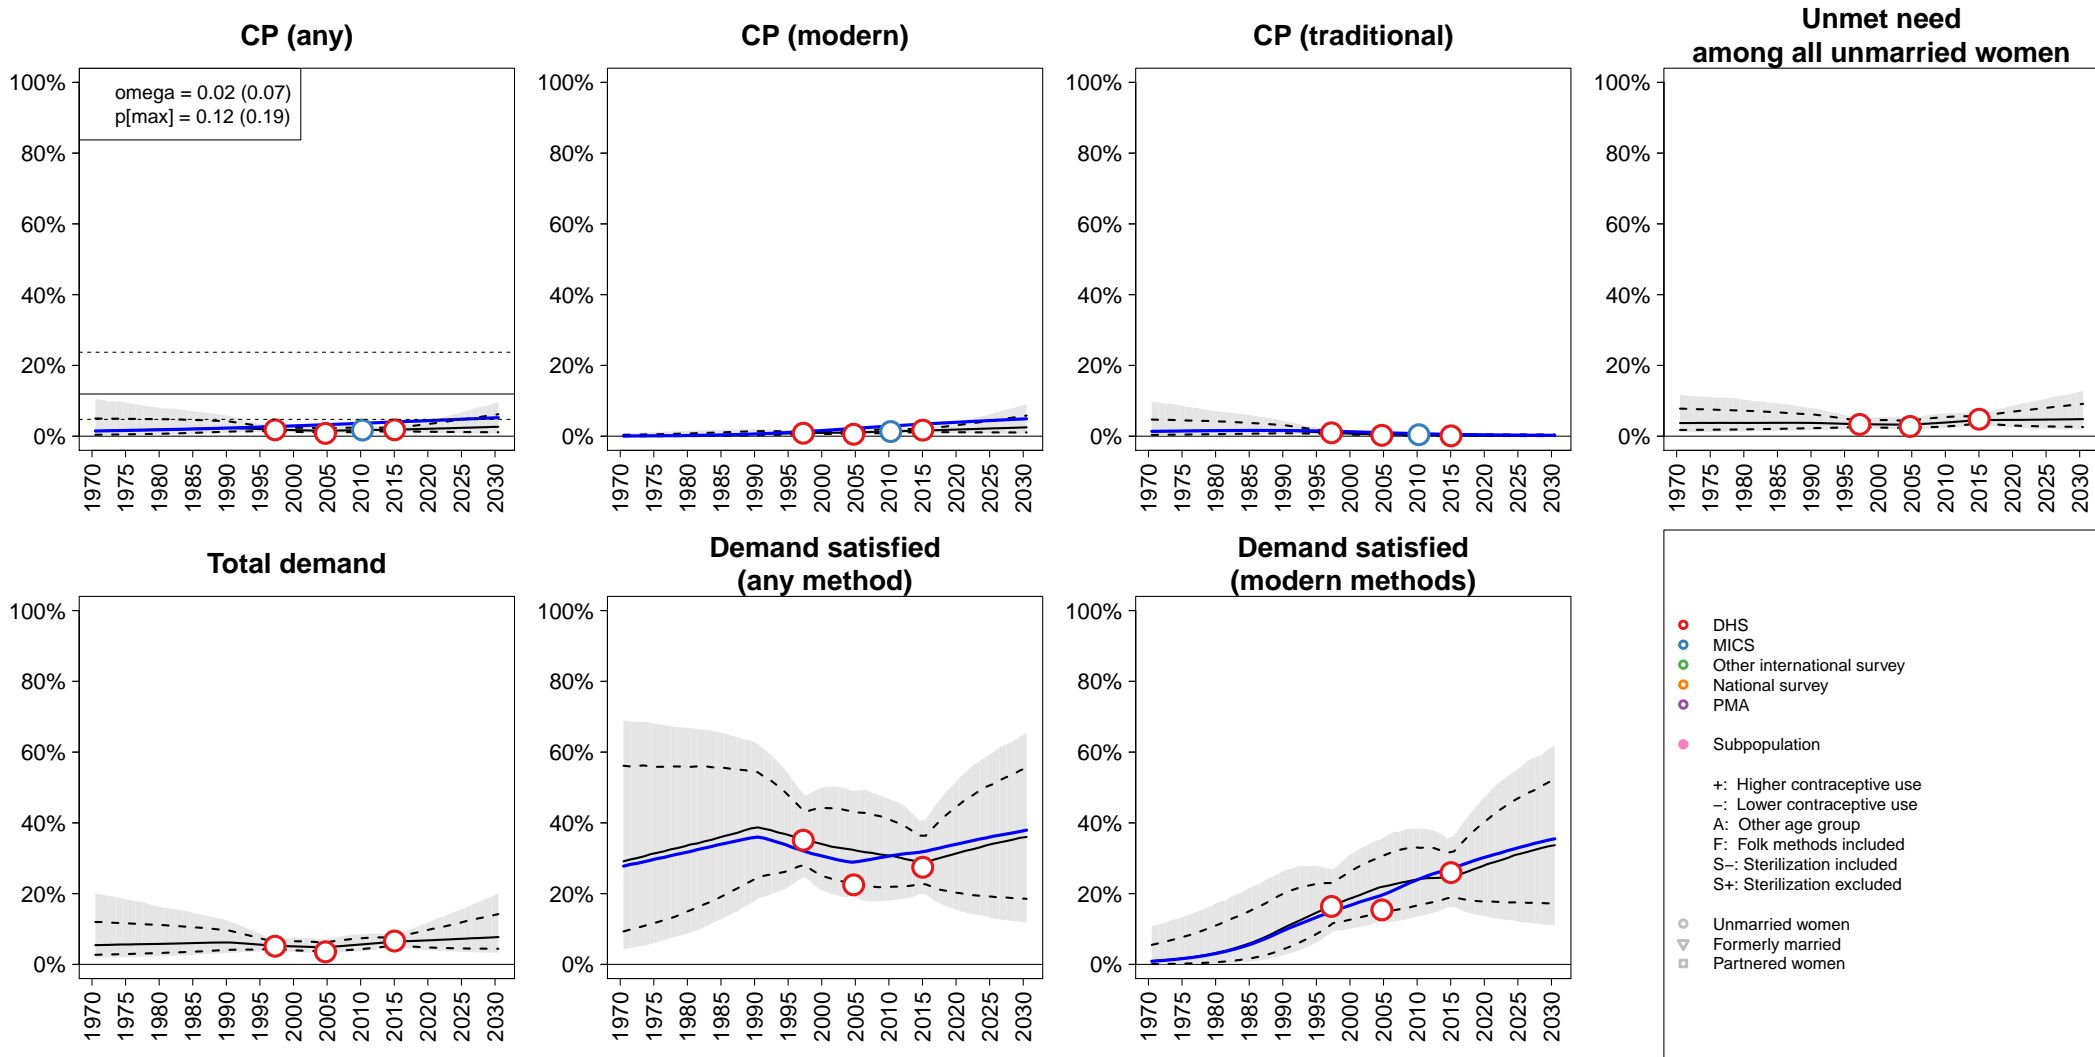

Colombia (South America, SA Group 1) --- Unmarried / Not In-Union

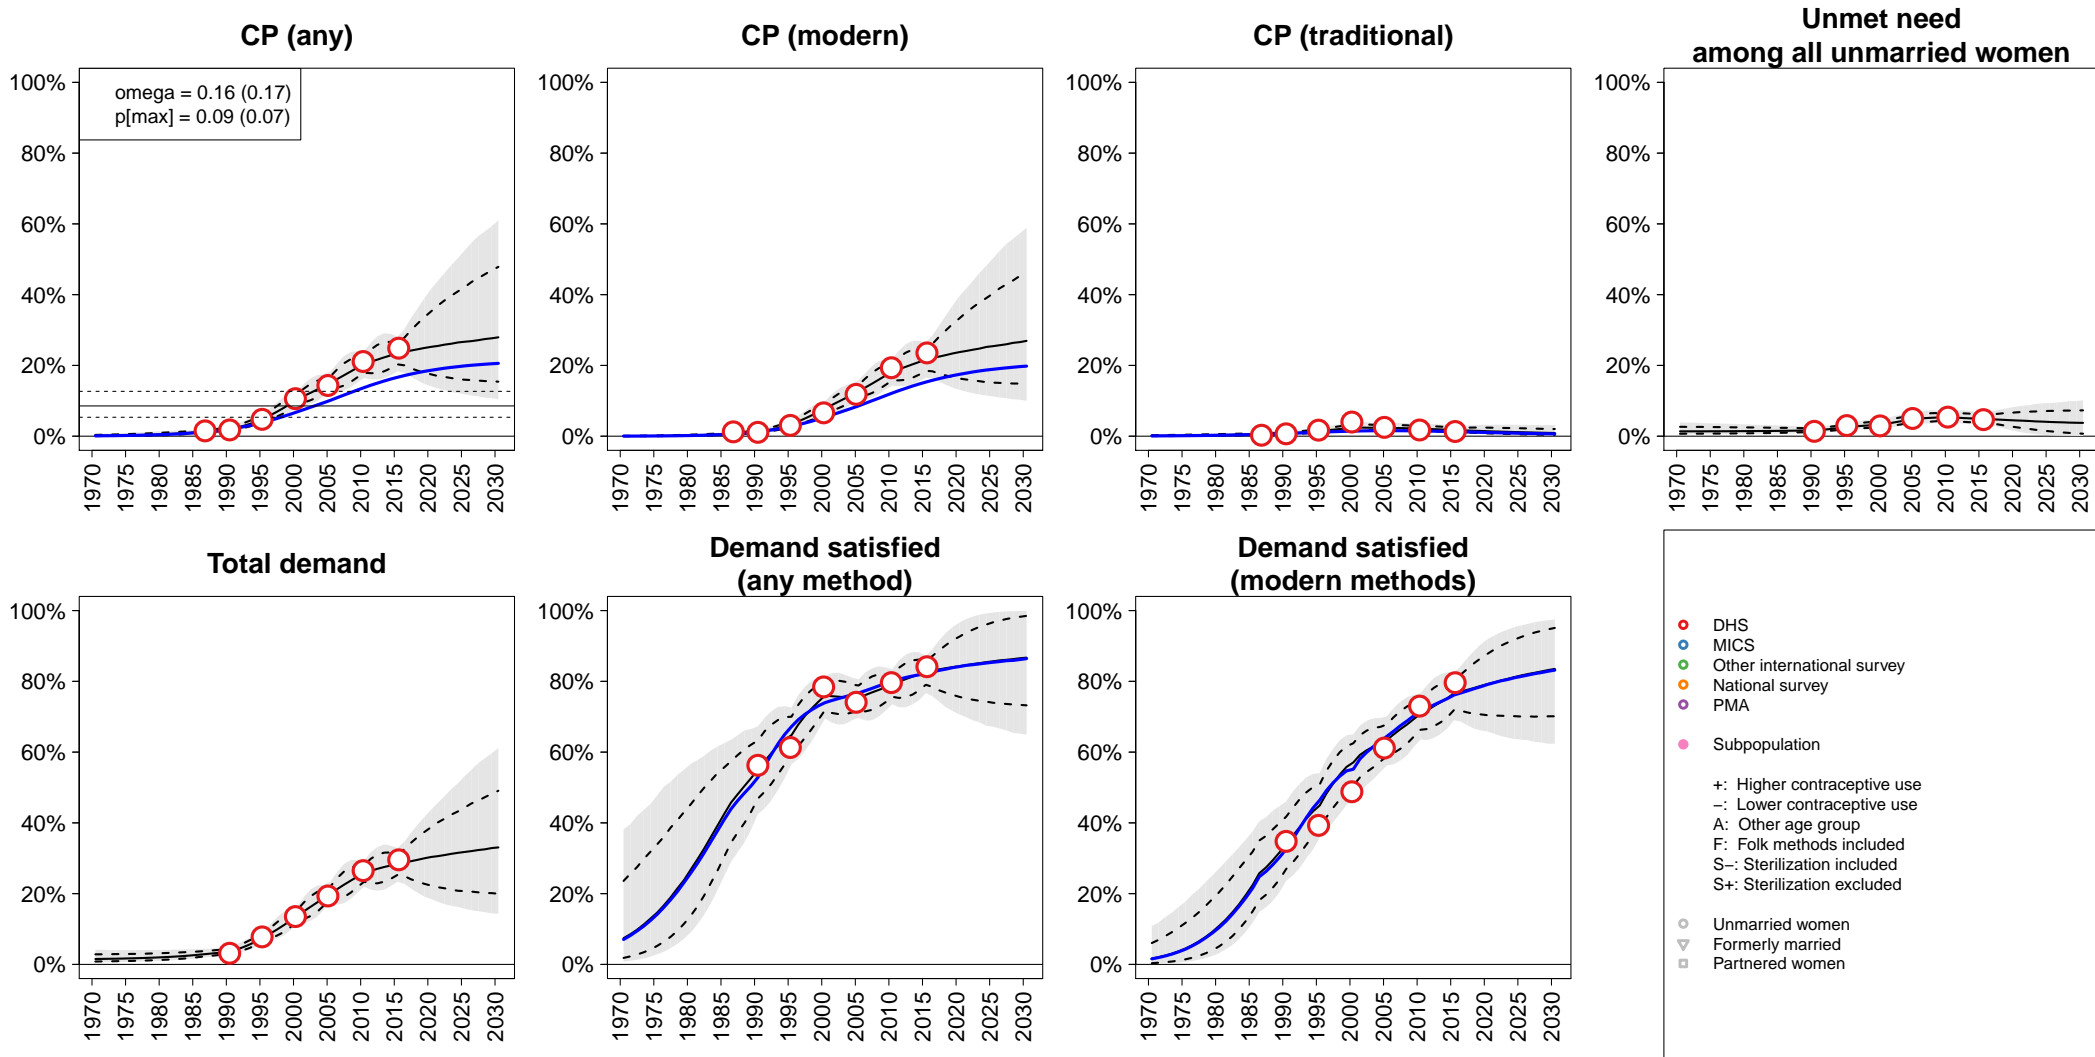



Comoros (Eastern Africa, SA Group 1) --- Unmarried / Not In-Union

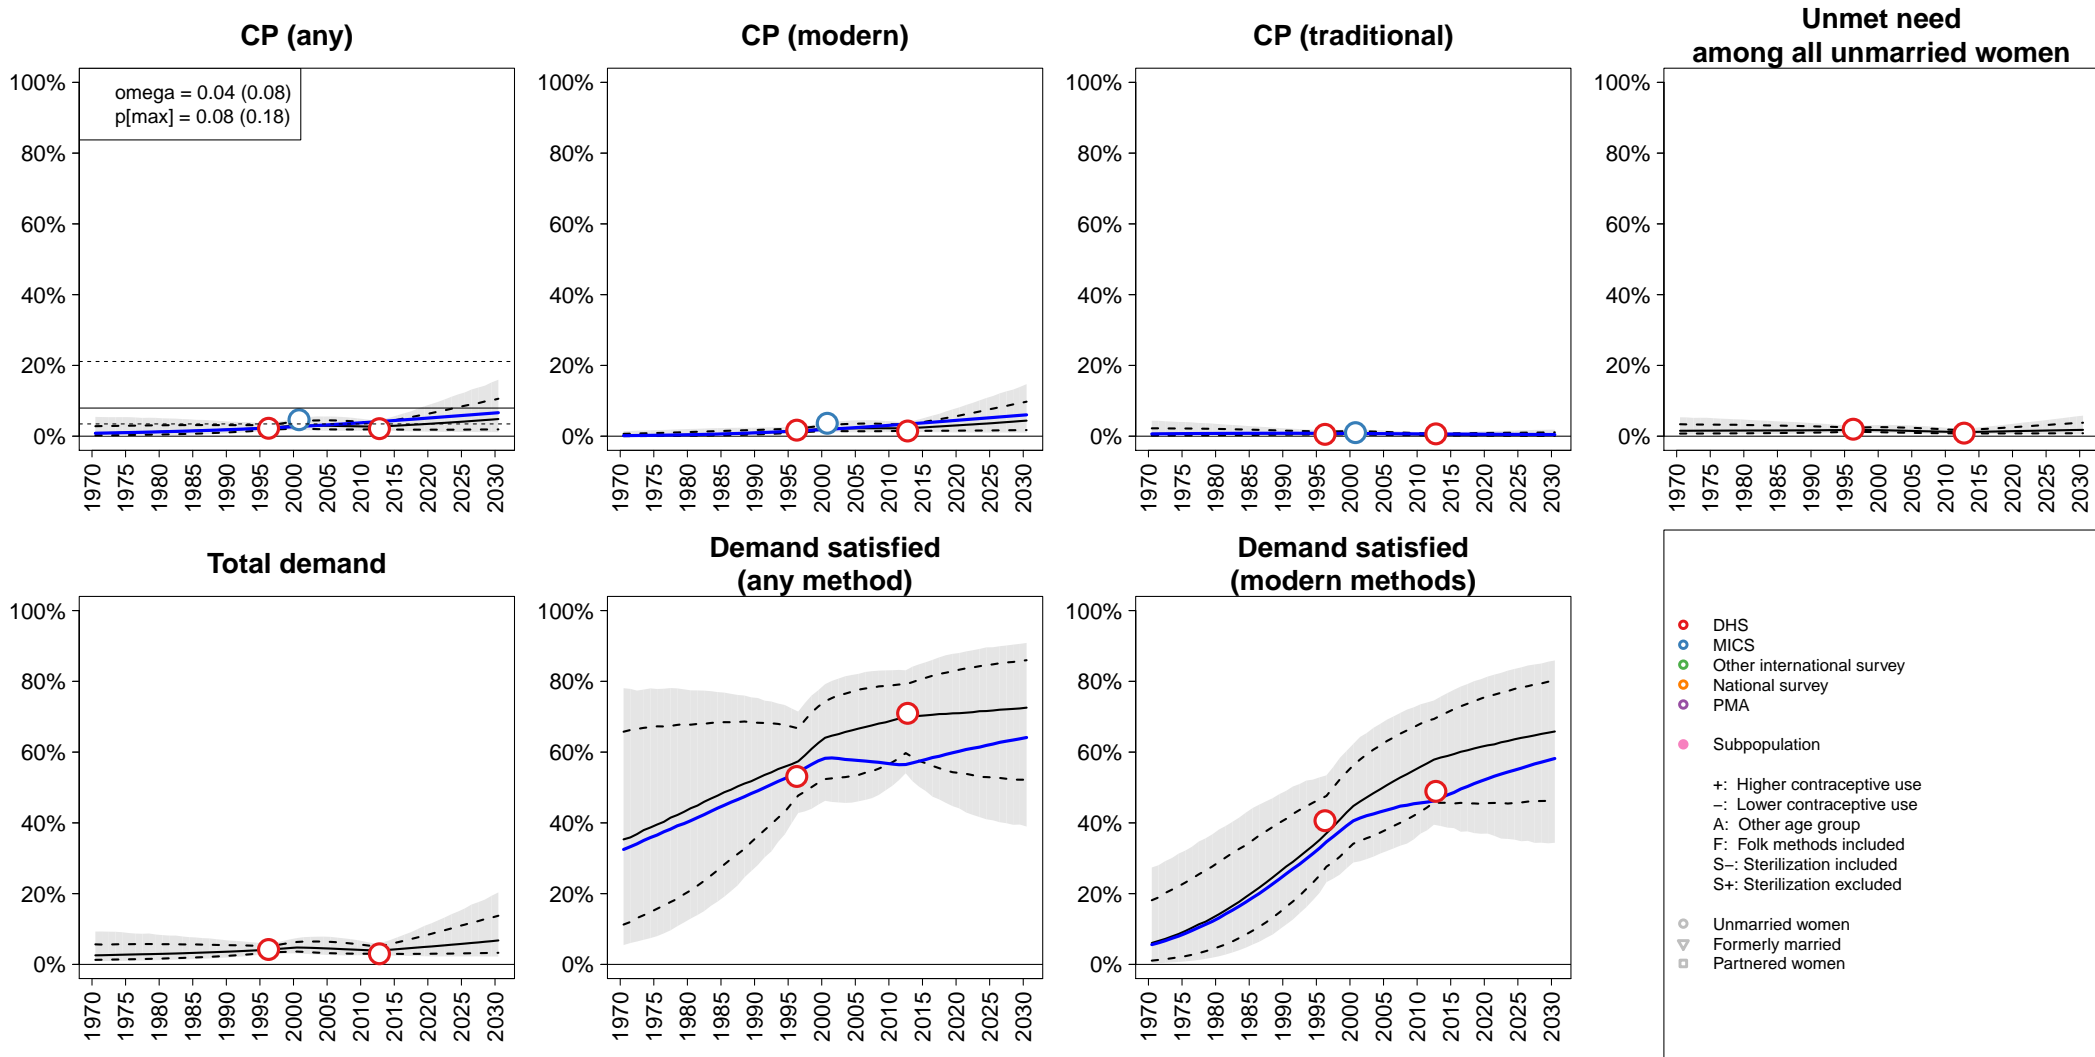

Congo (Middle Africa, SA Group 1) --- Unmarried / Not In-Union

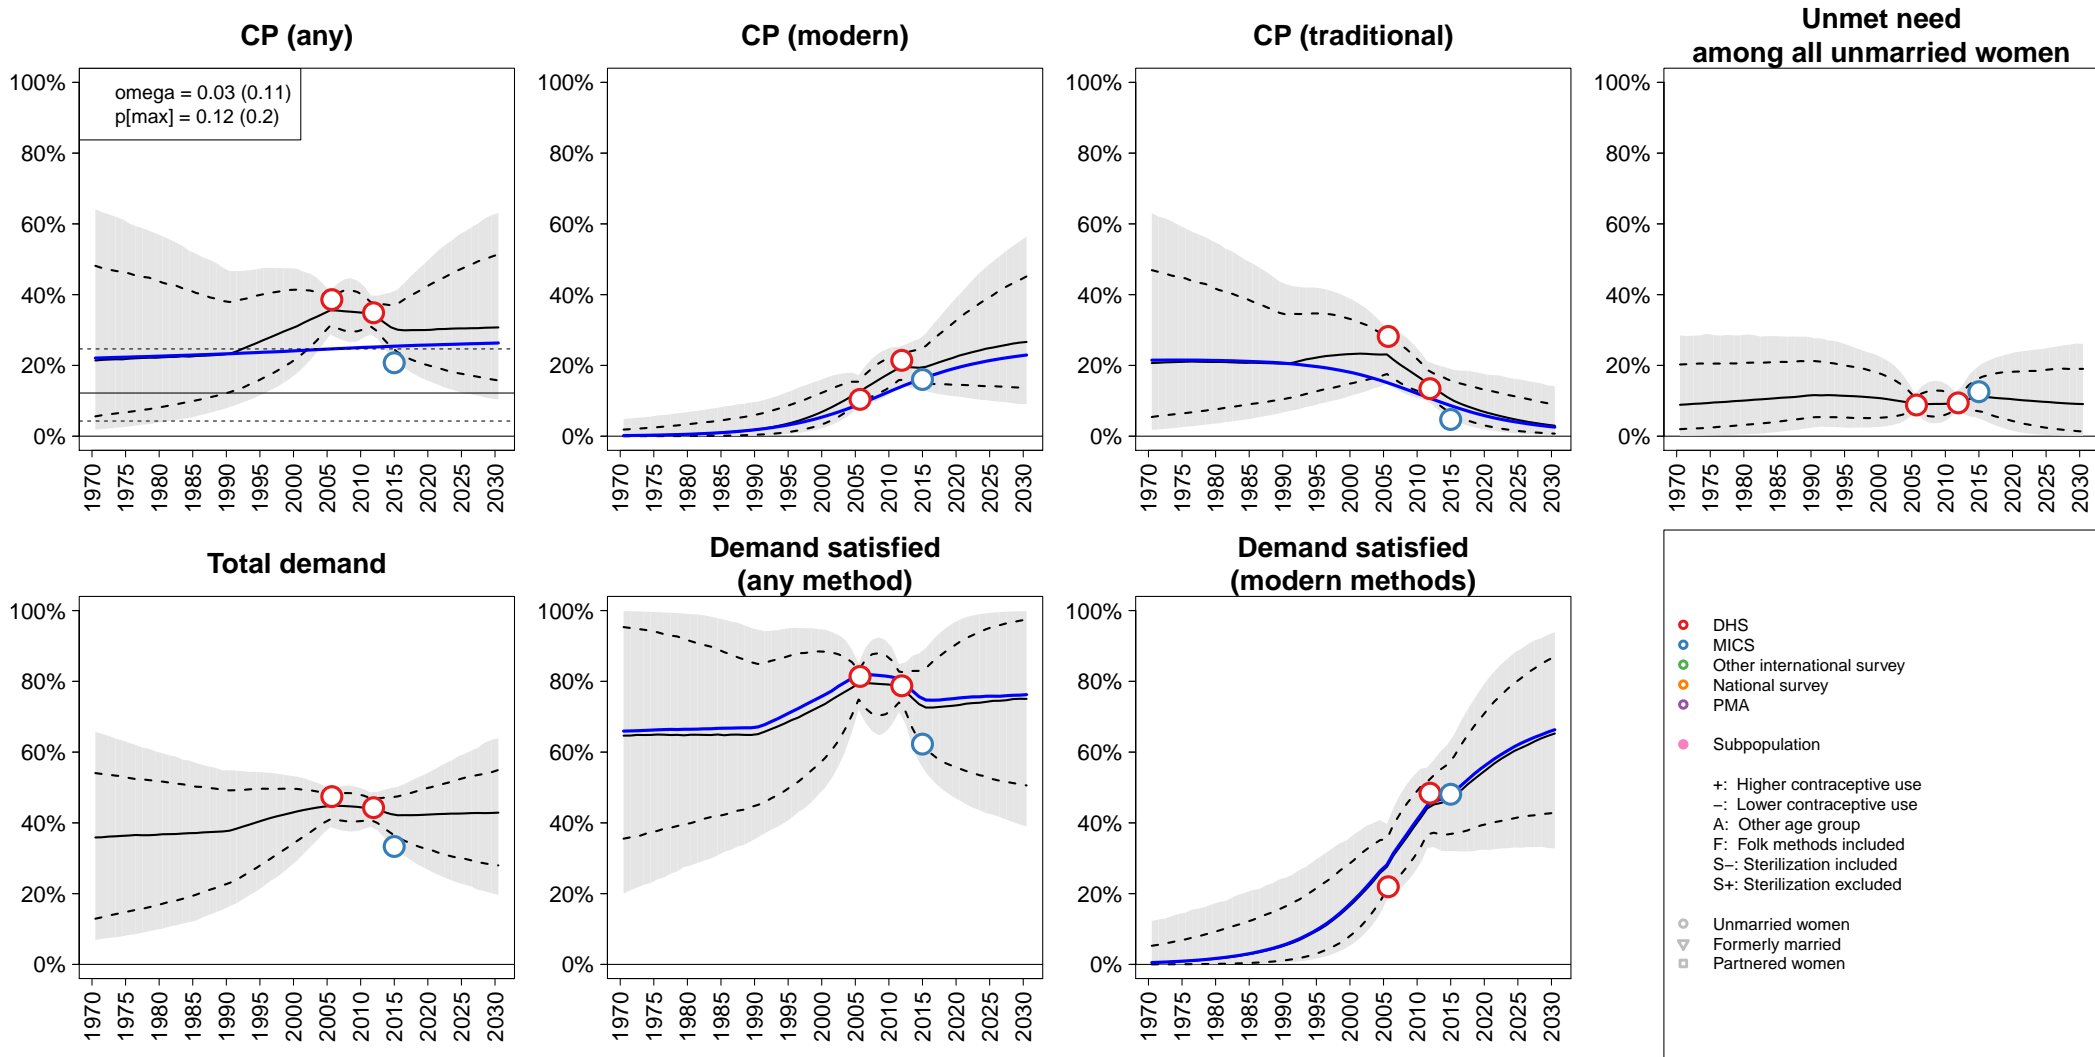

Costa Rica (Central America, SA Group 1) --- Unmarried / Not In-Union

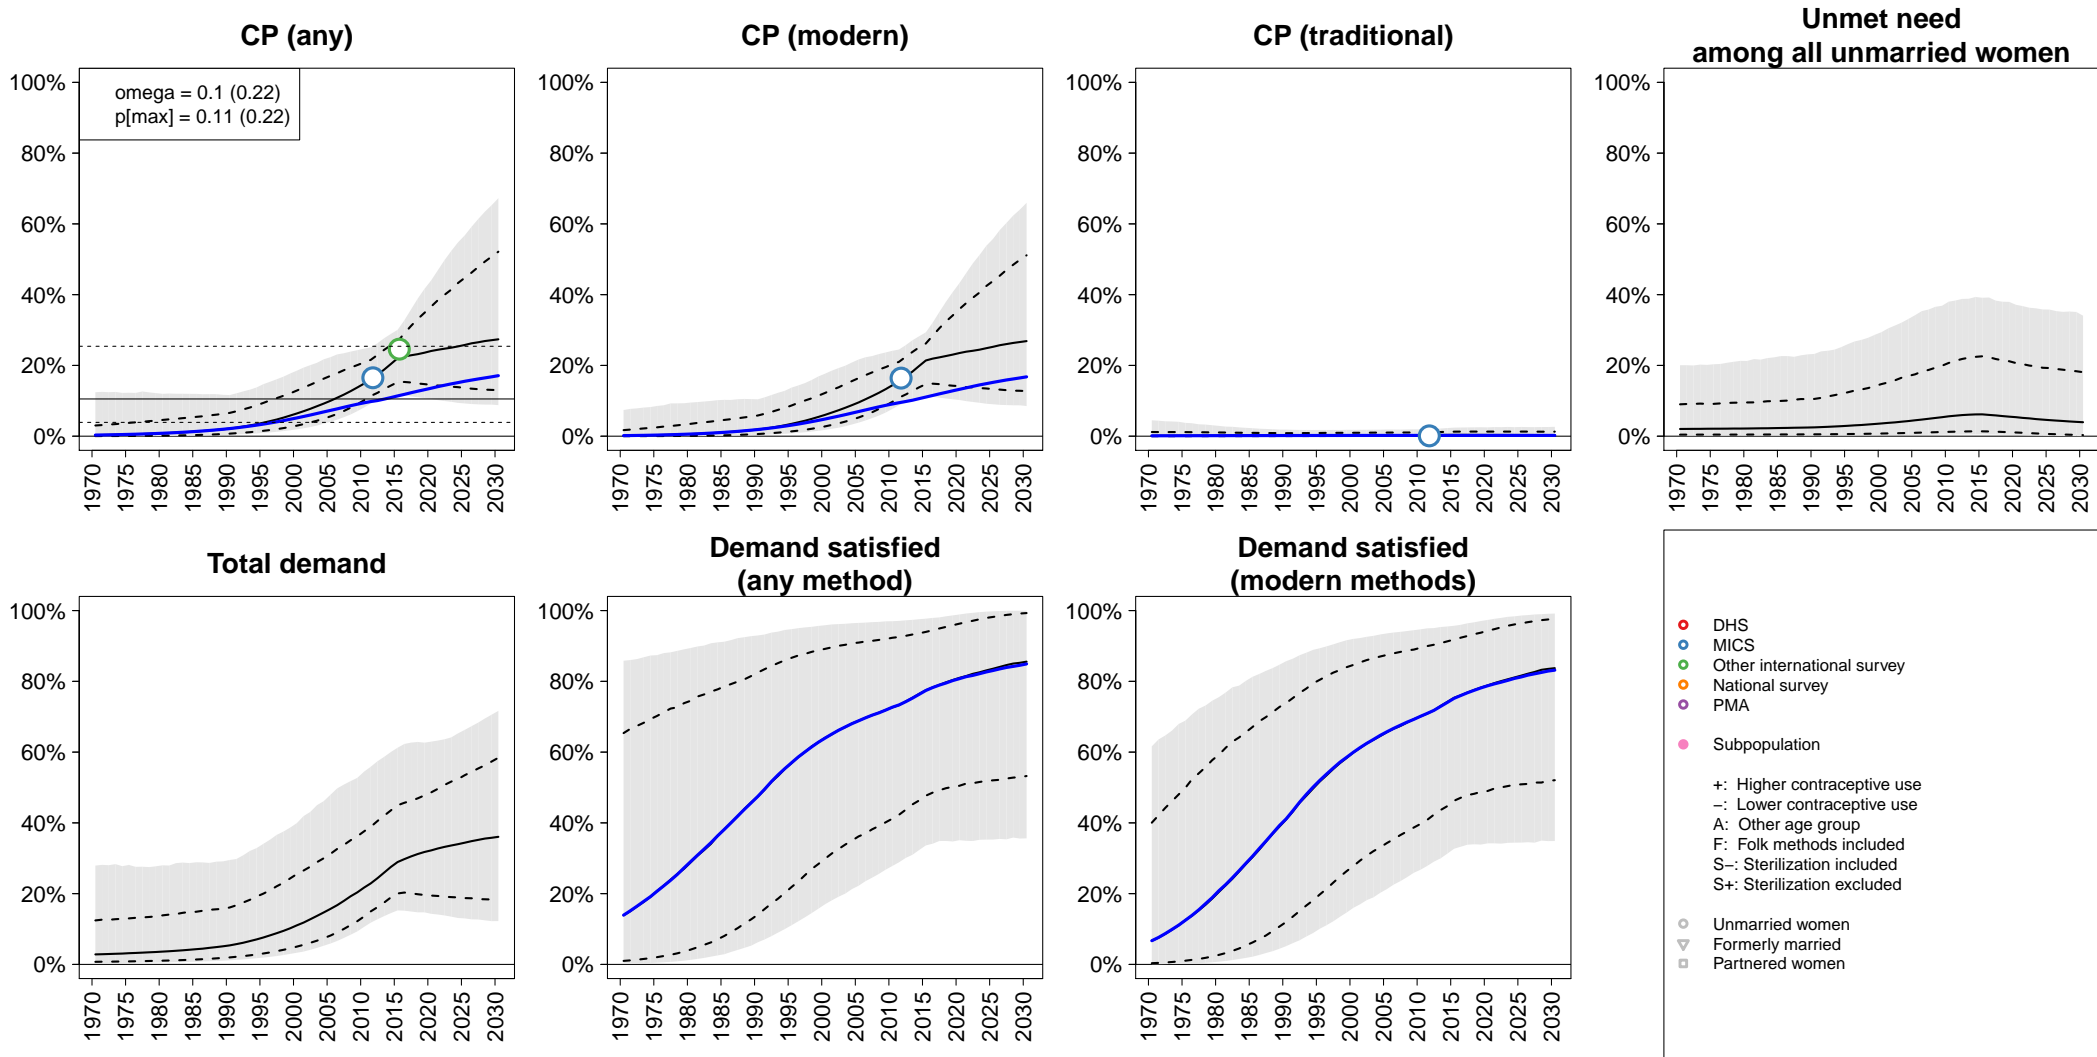

Côte d'Ivoire (Western Africa, SA Group 1) --- Unmarried / Not In-Union

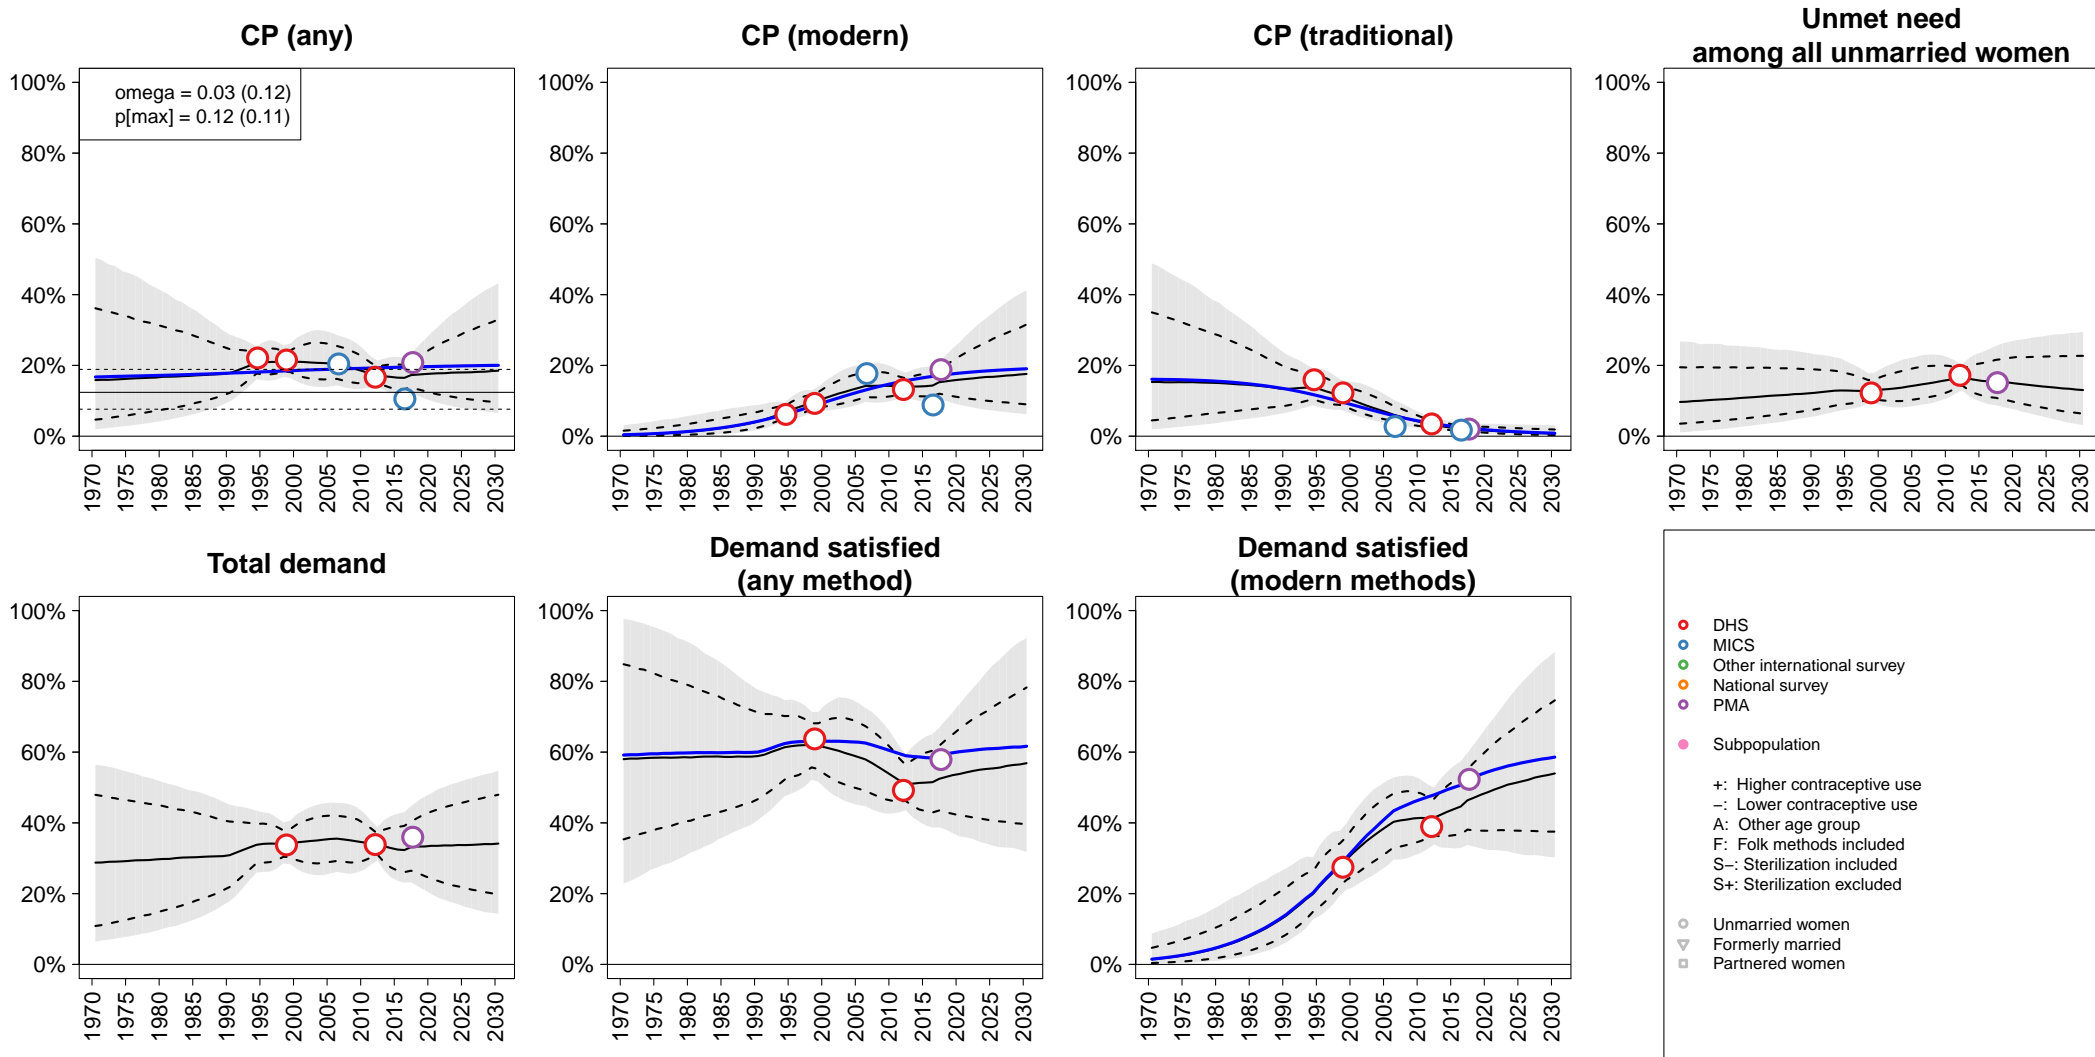

Cuba (Caribbean, SA Group 1) --- Unmarried / Not In-Union

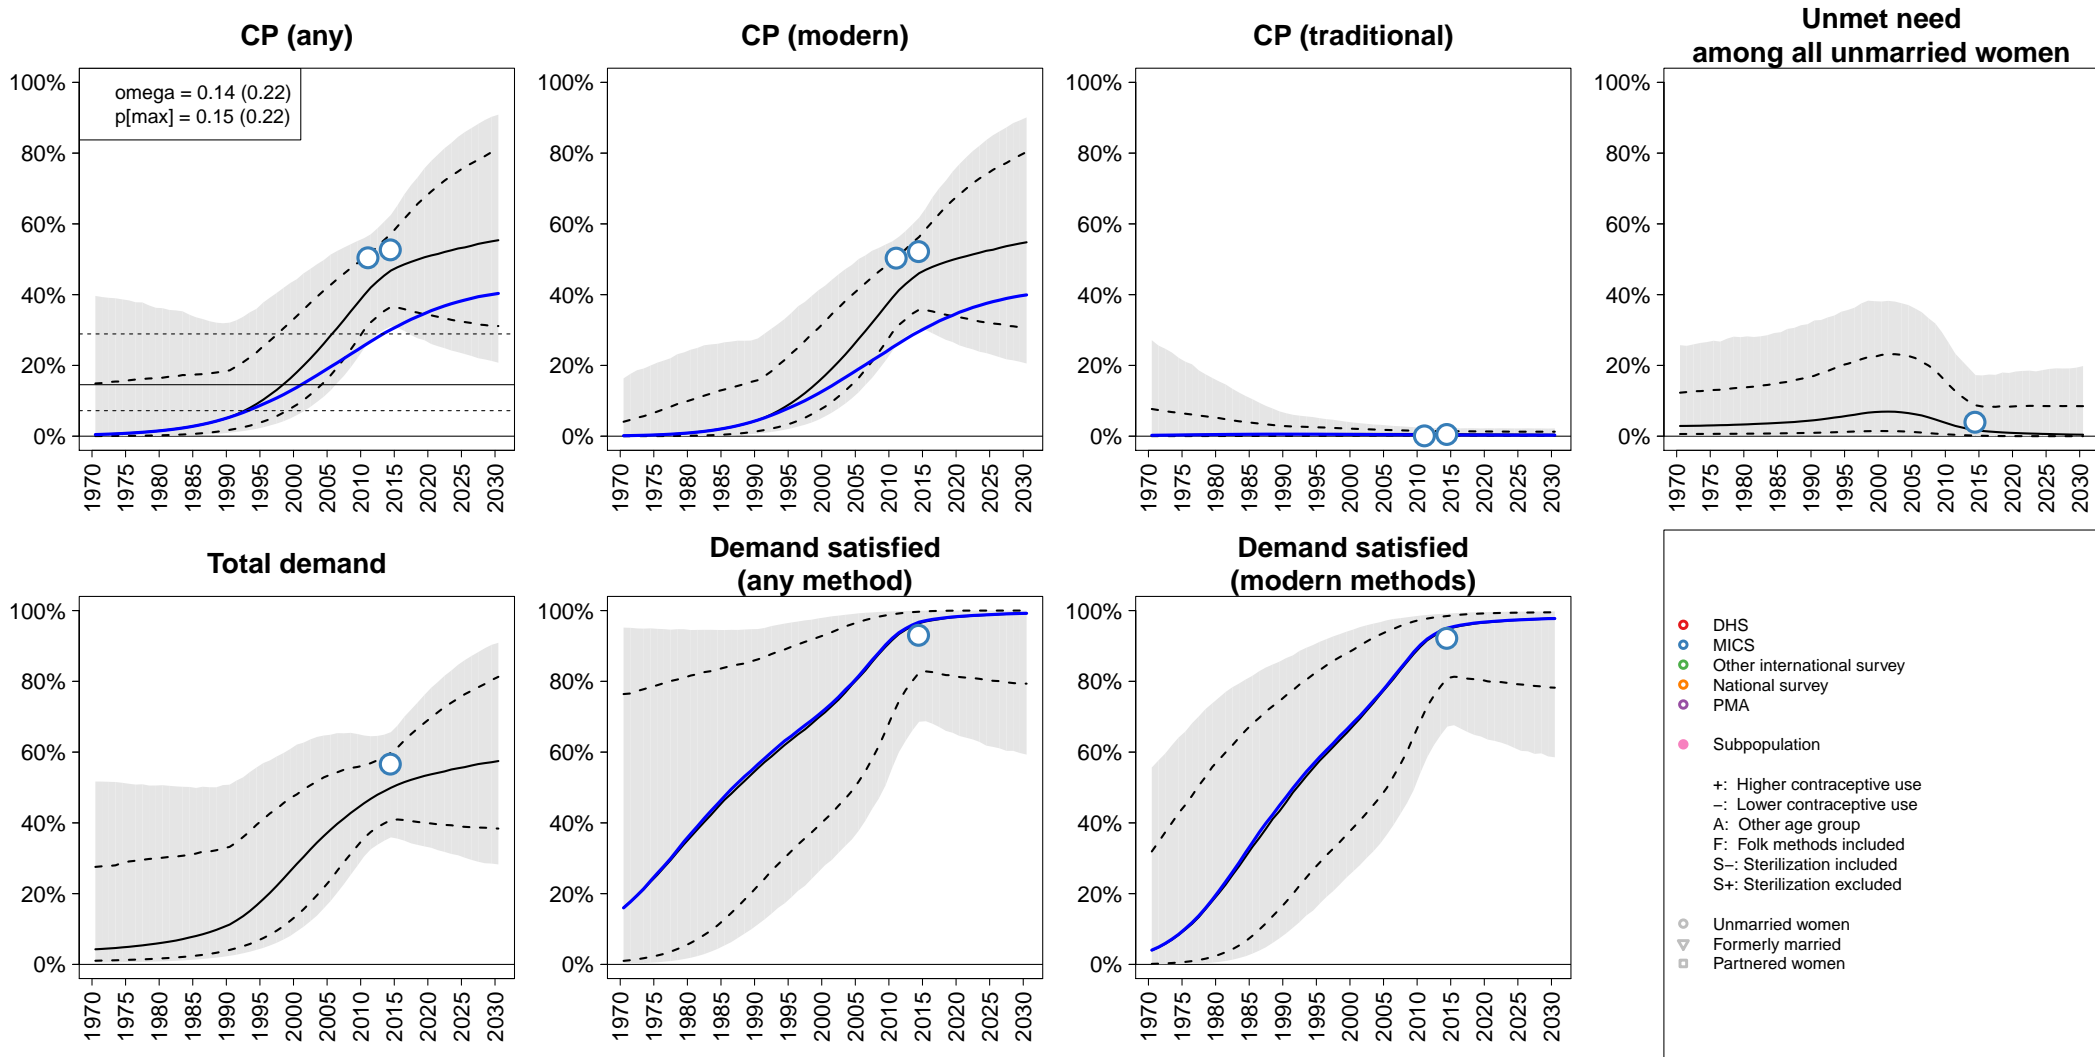

Democratic Rep. of the Congo (Middle Africa, SA Group 1) --- Unmarried / Not In-Union

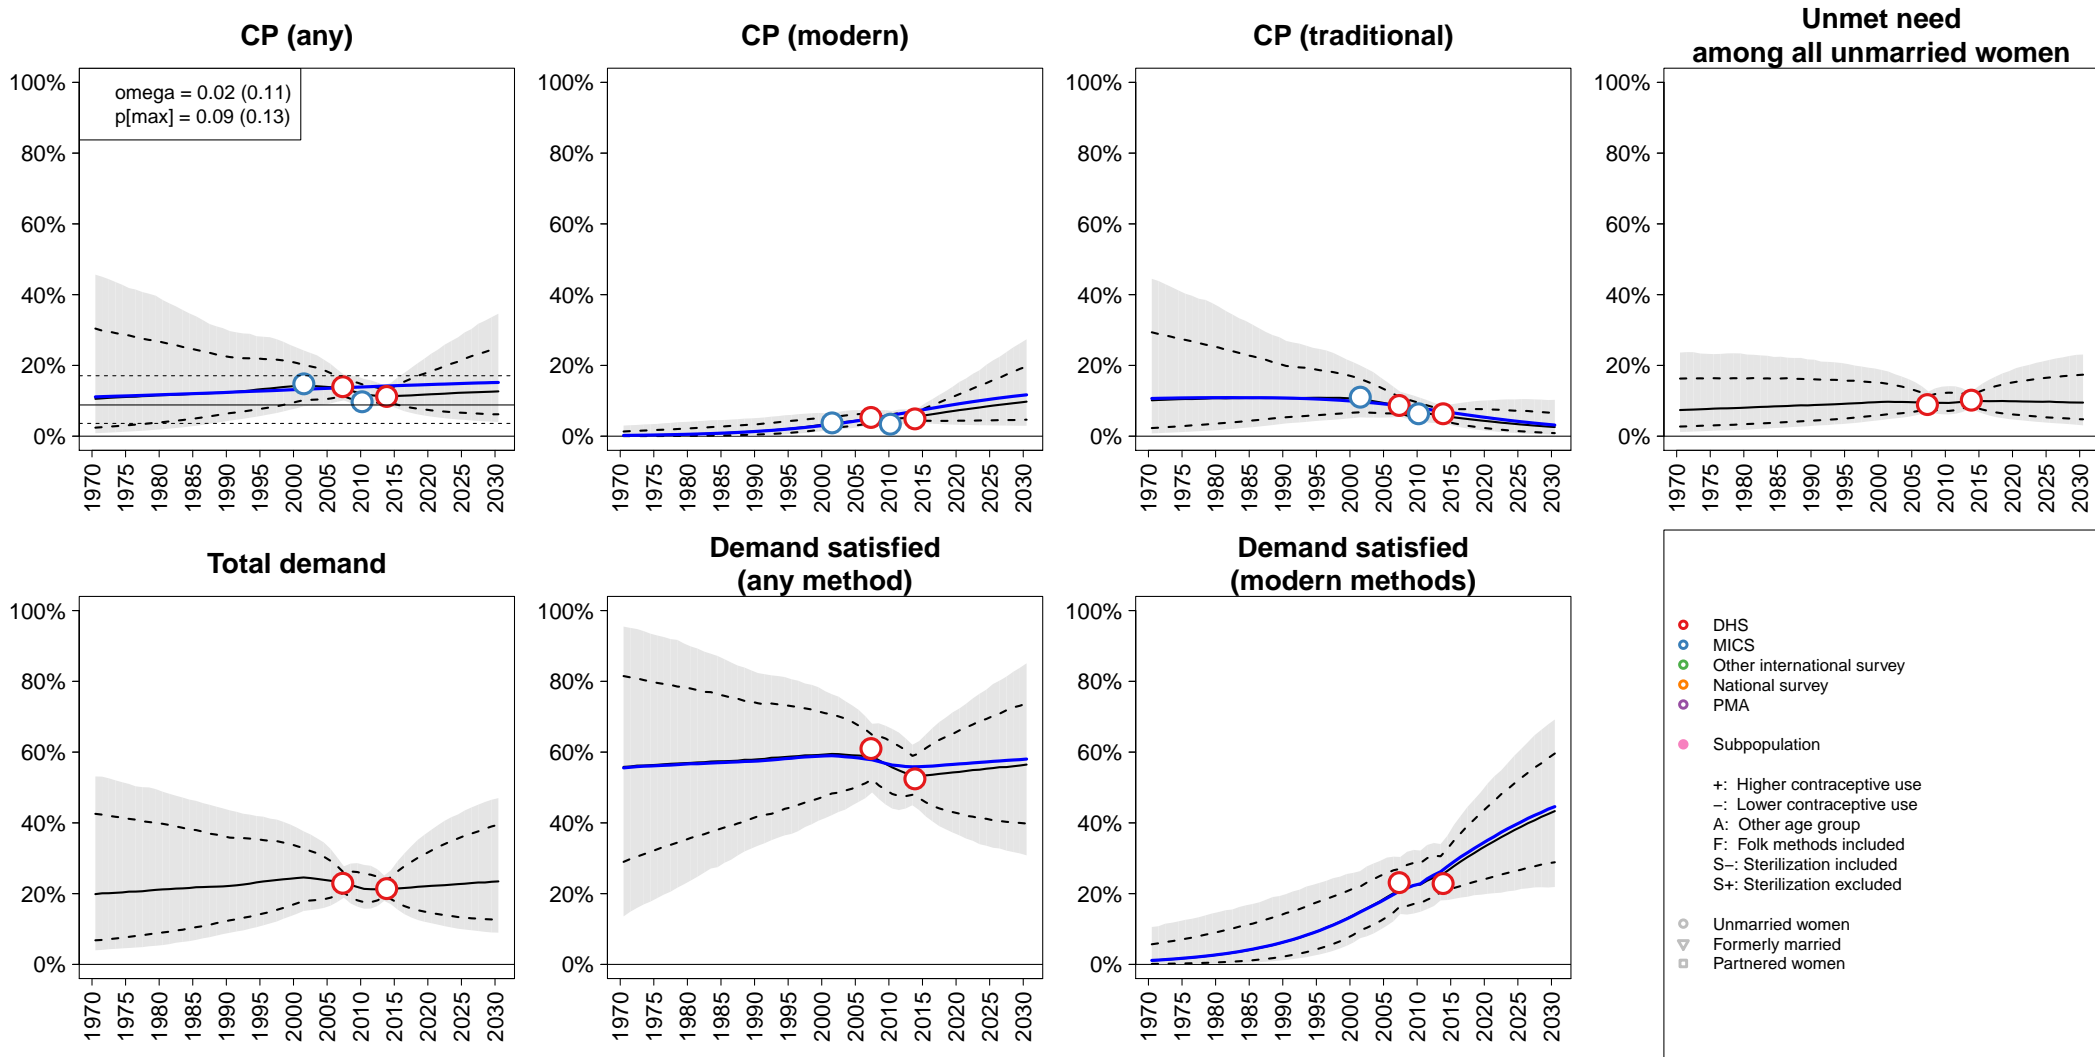

Democratic Republic of Timor-Leste (South-eastern Asia, SA Group 0) --- Unmarried / Not In-Union

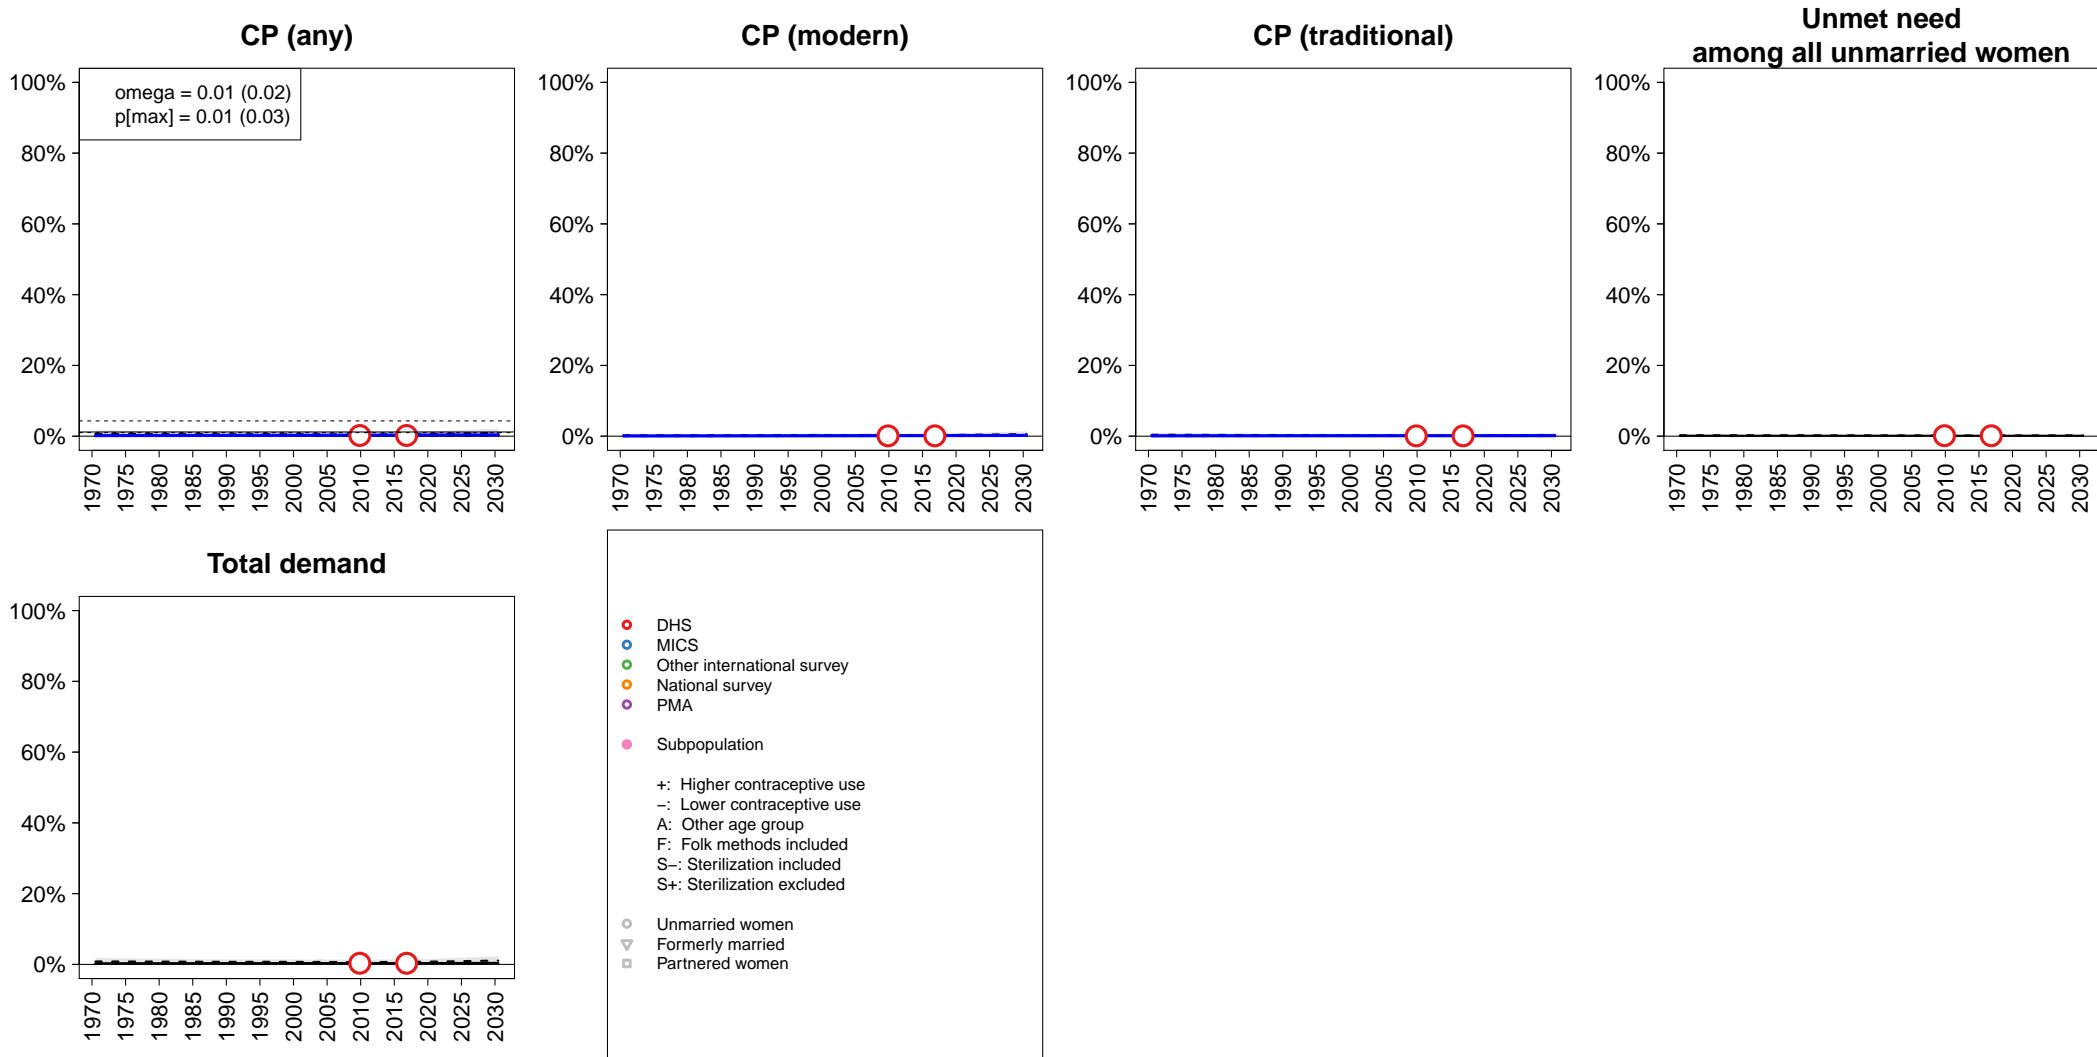

Dominican Republic (Caribbean, SA Group 1) --- Unmarried / Not In-Union

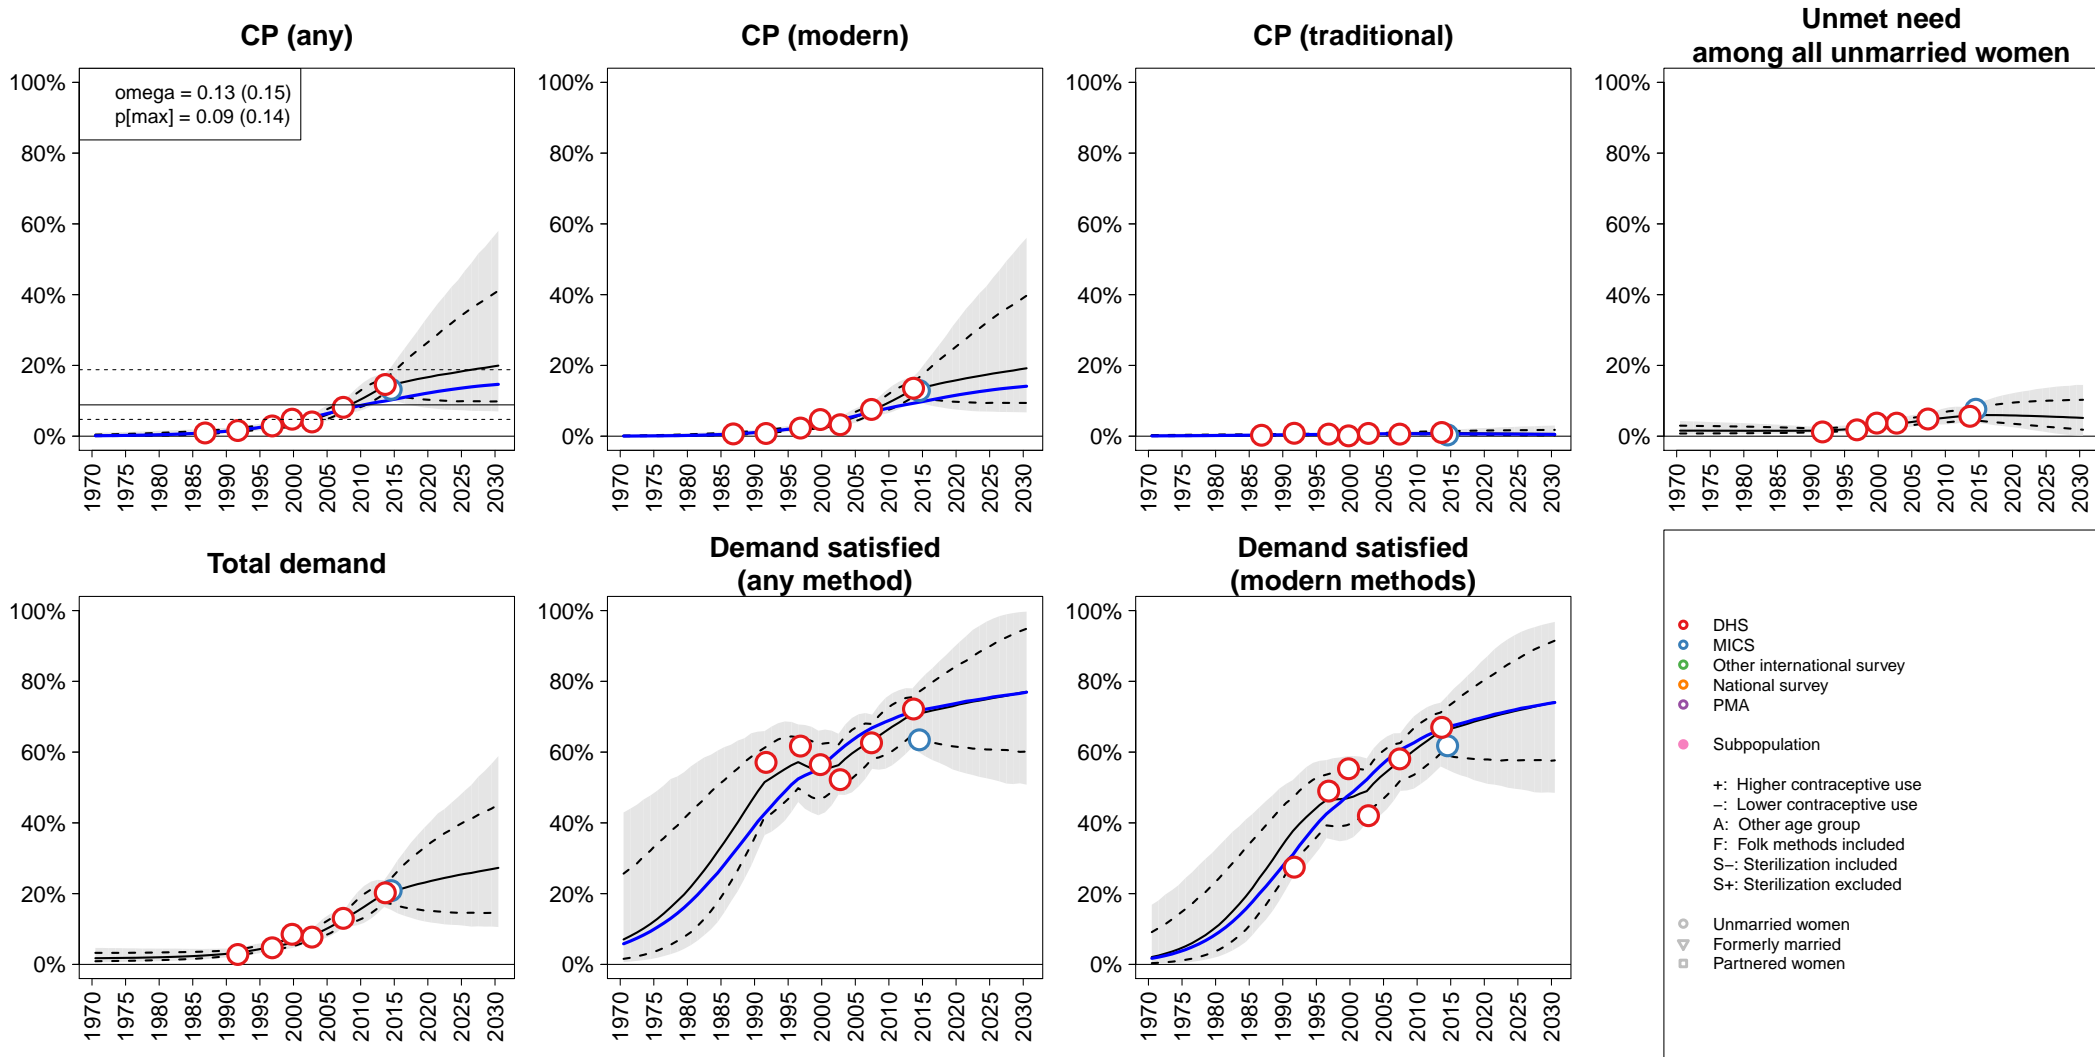



Ecuador (South America, SA Group 1) --- Unmarried / Not In-Union

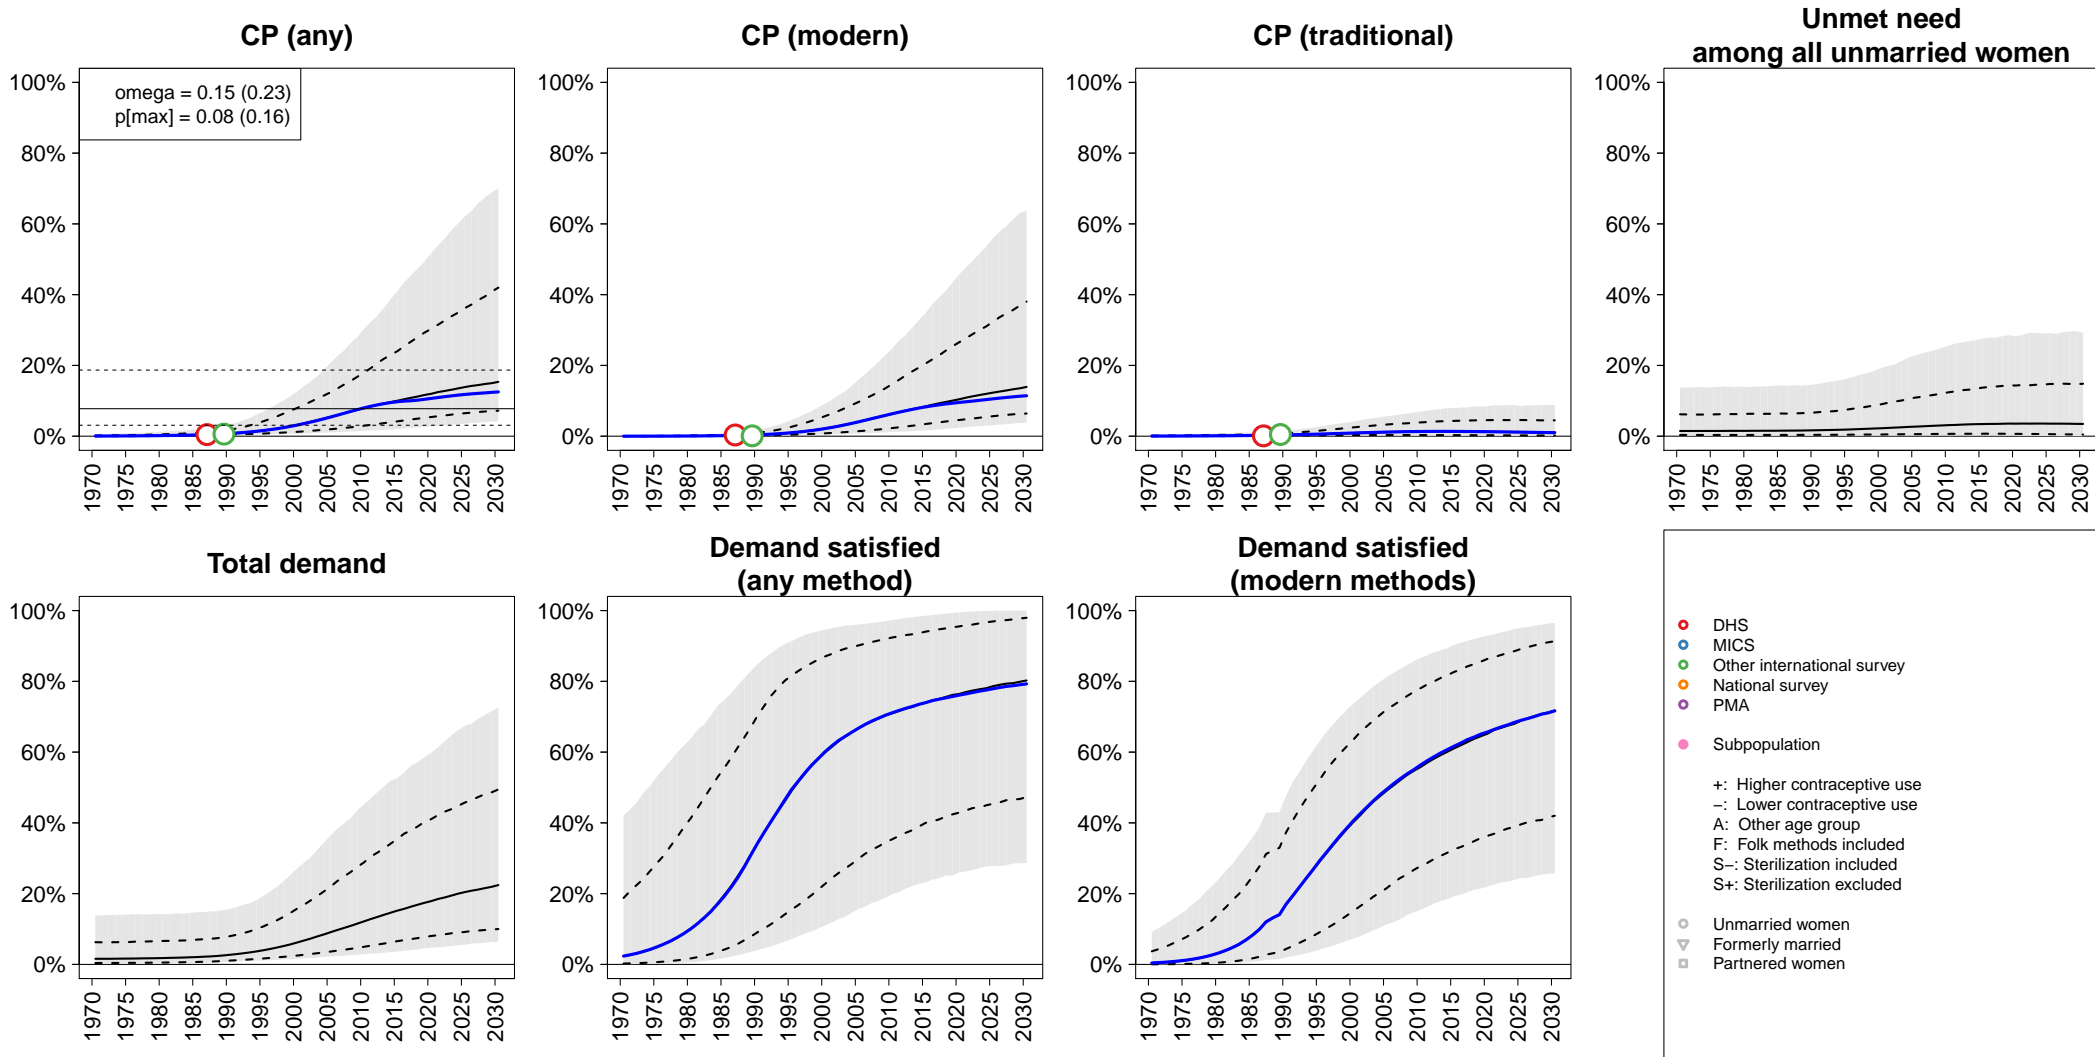

El Salvador (Central America, SA Group 1) --- Unmarried / Not In-Union

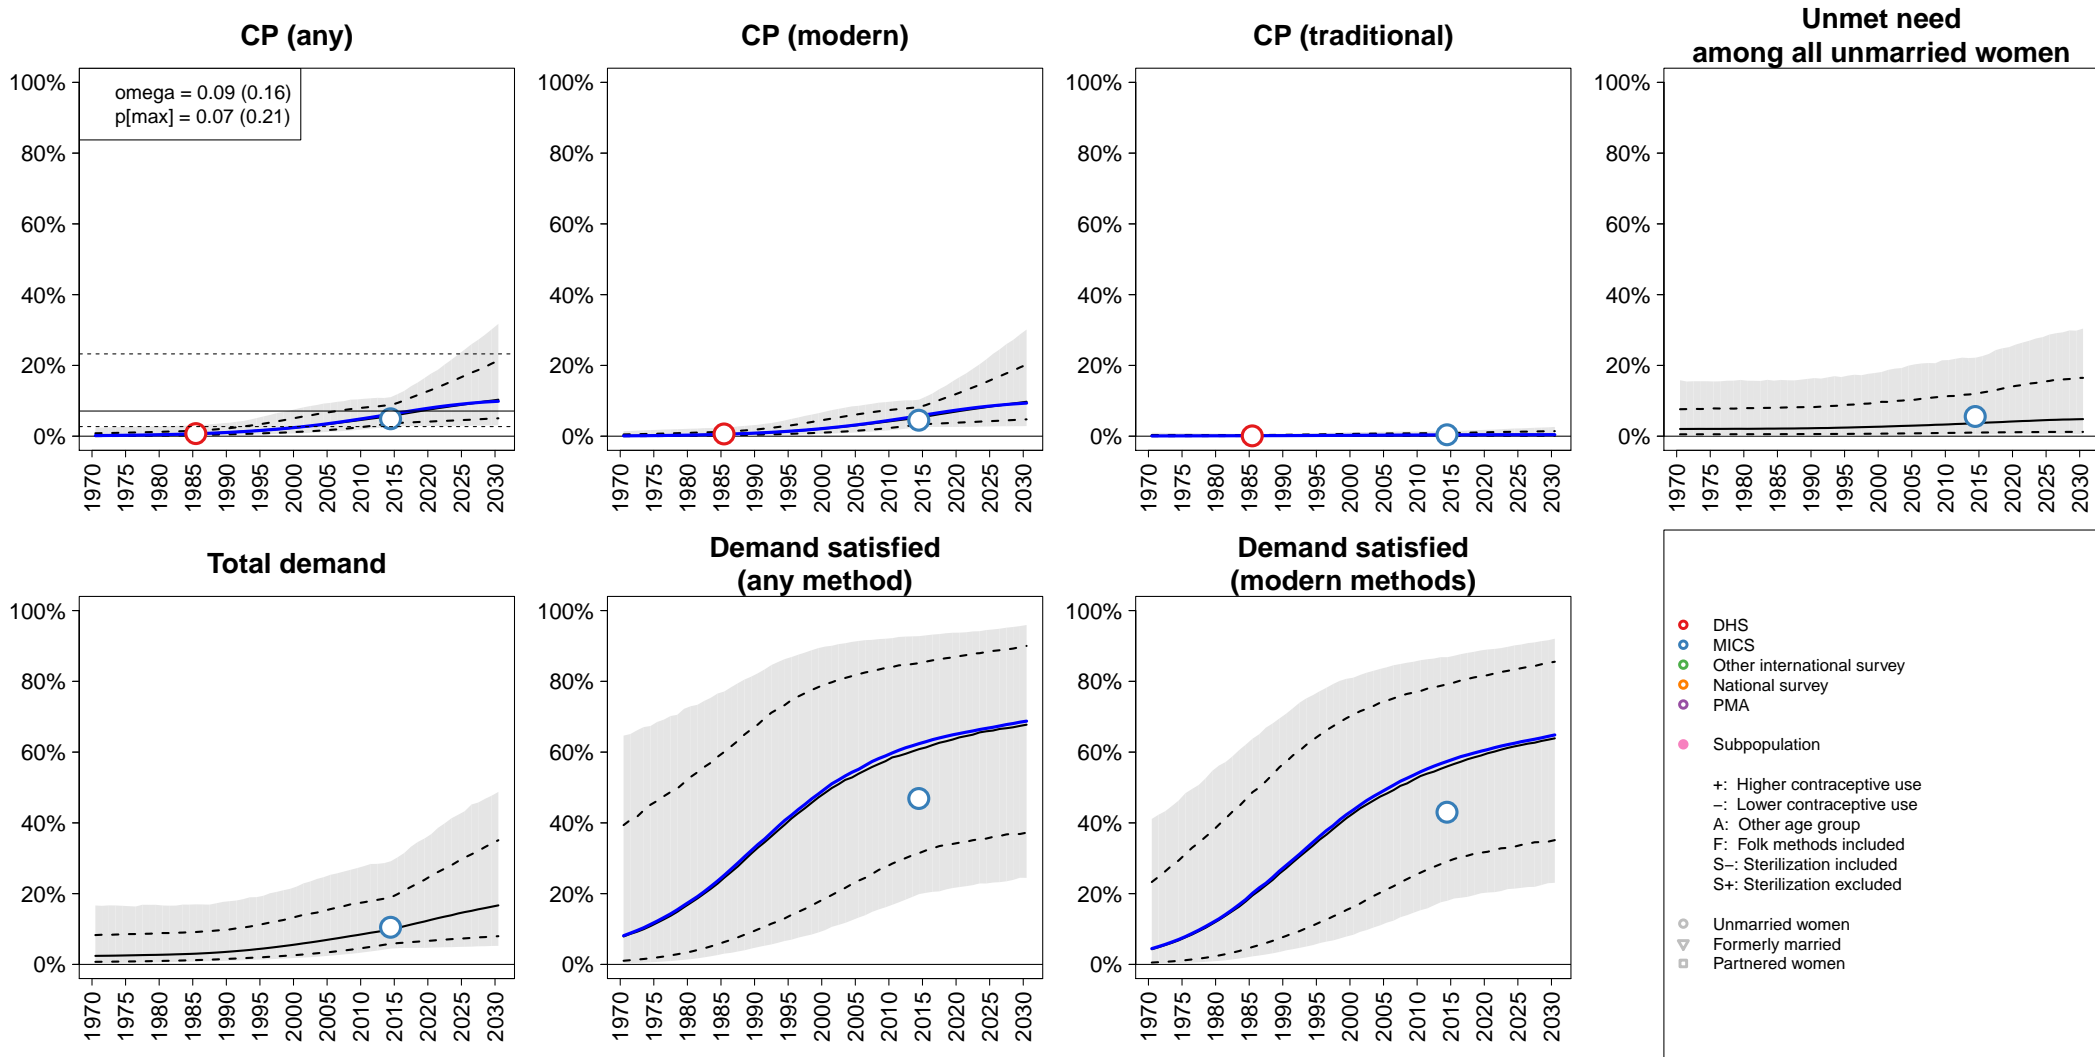

Eritrea (Eastern Africa, SA Group 1) --- Unmarried / Not In-Union

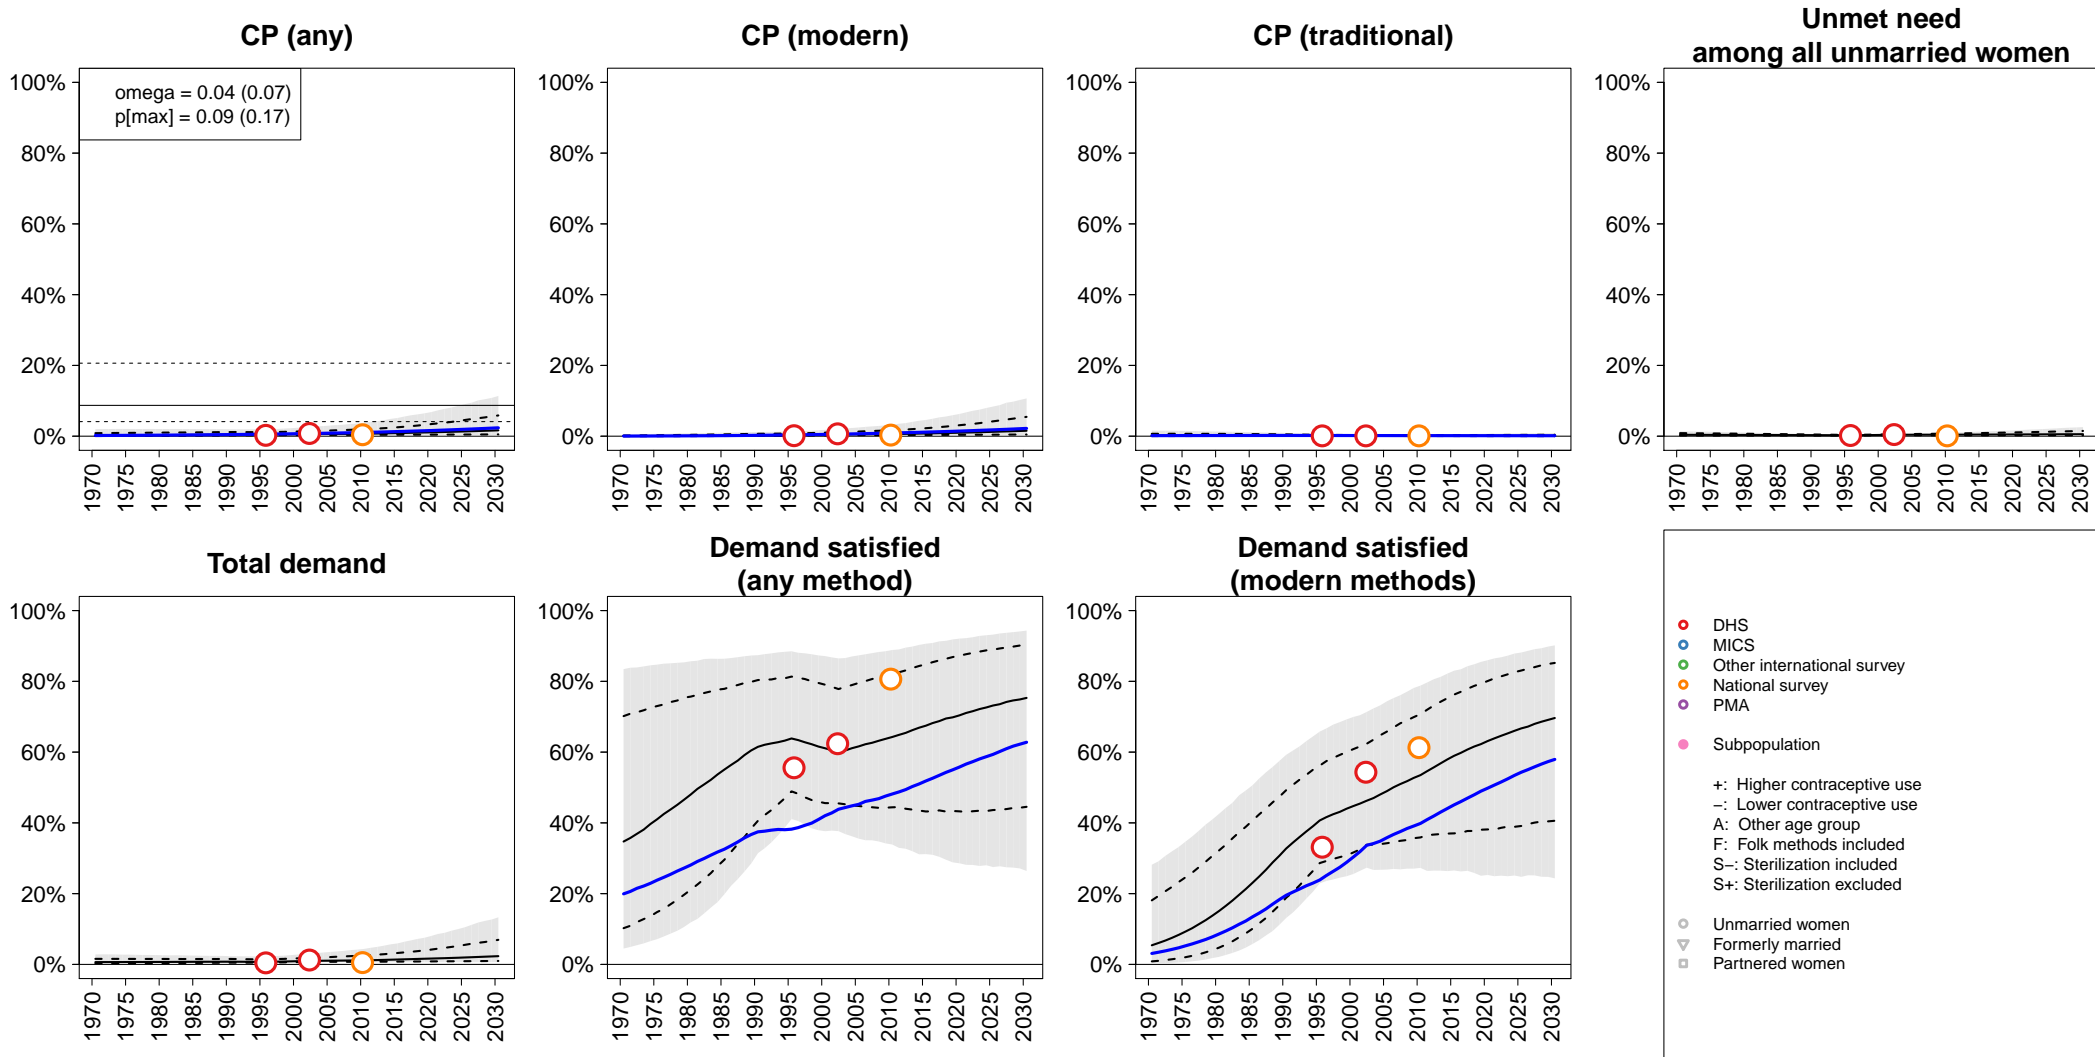

Eswatini (Southern Africa, SA Group 1) --- Unmarried / Not In-Union

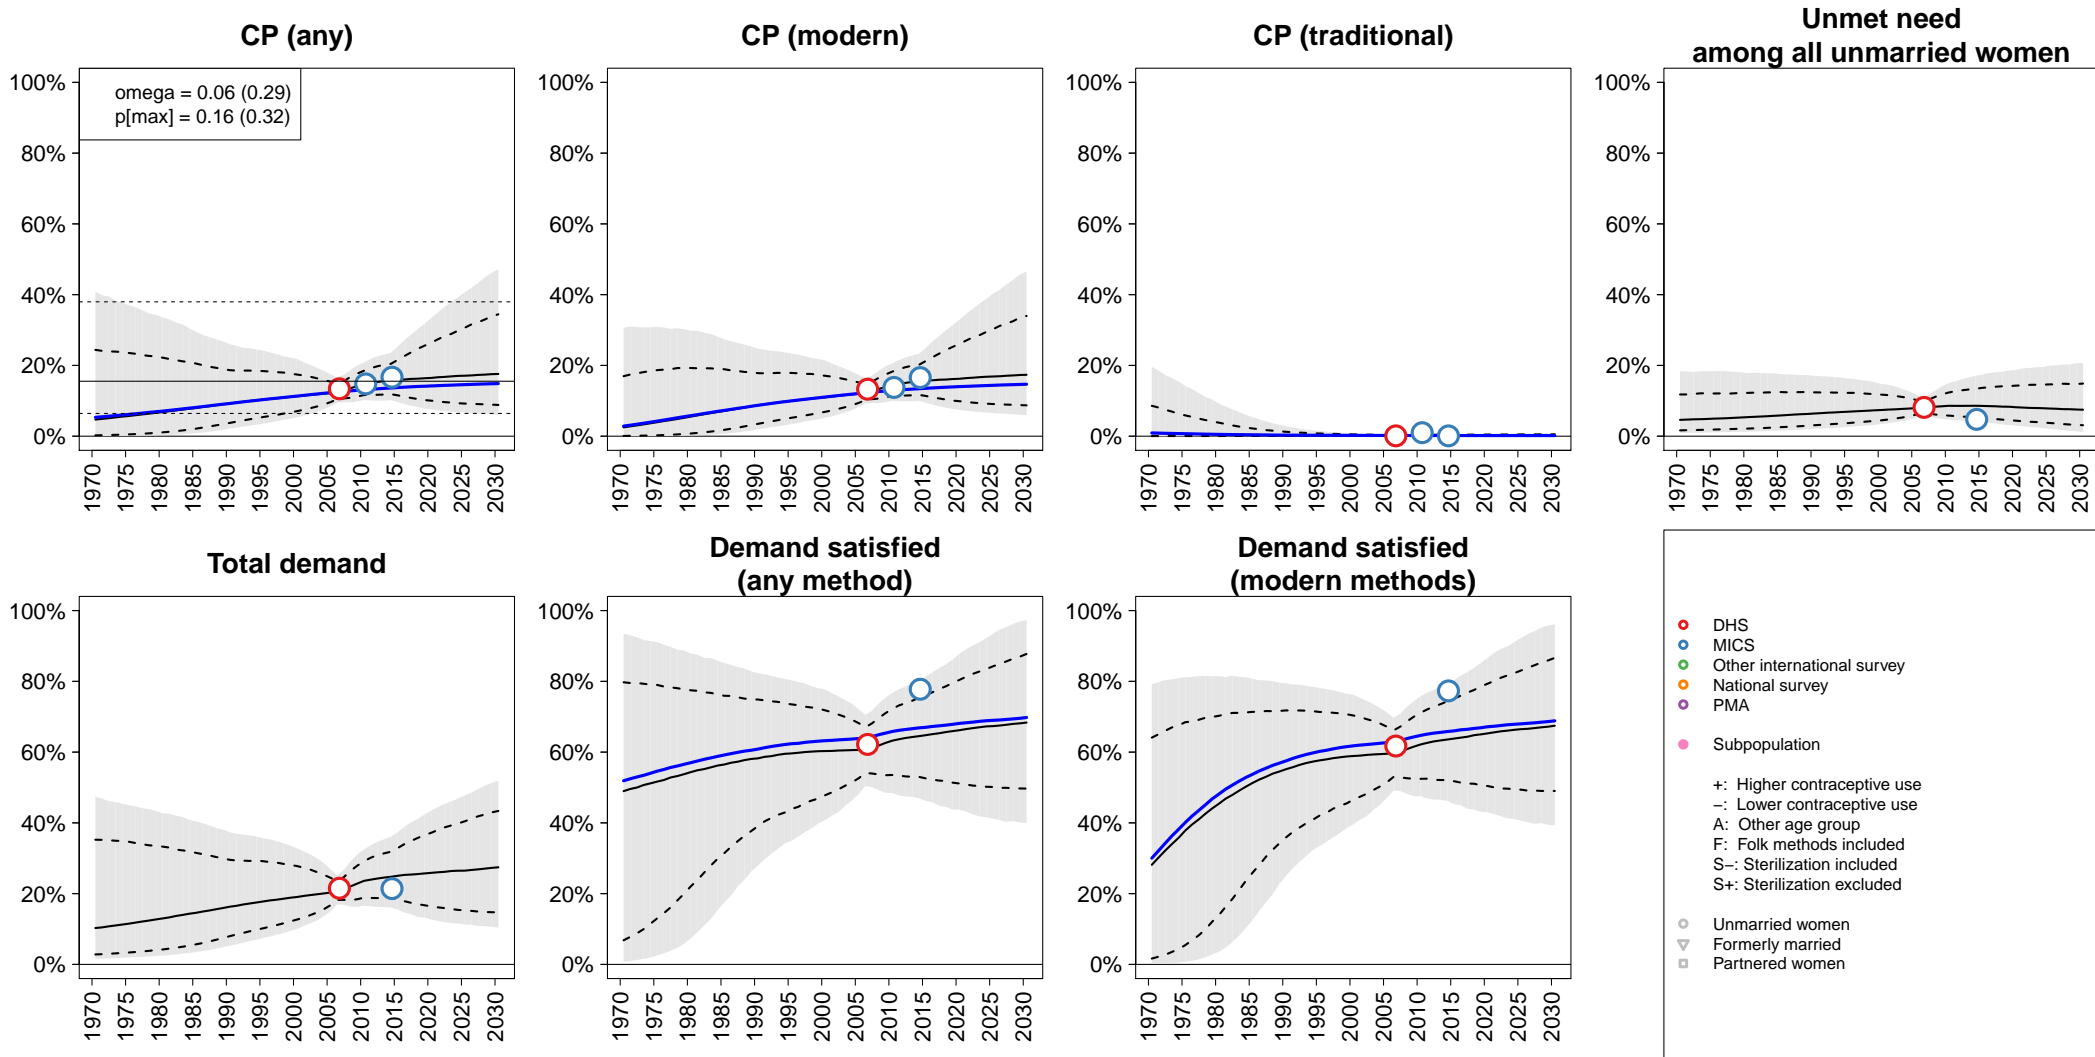

Ethiopia (Eastern Africa, SA Group 1) --- Unmarried / Not In-Union

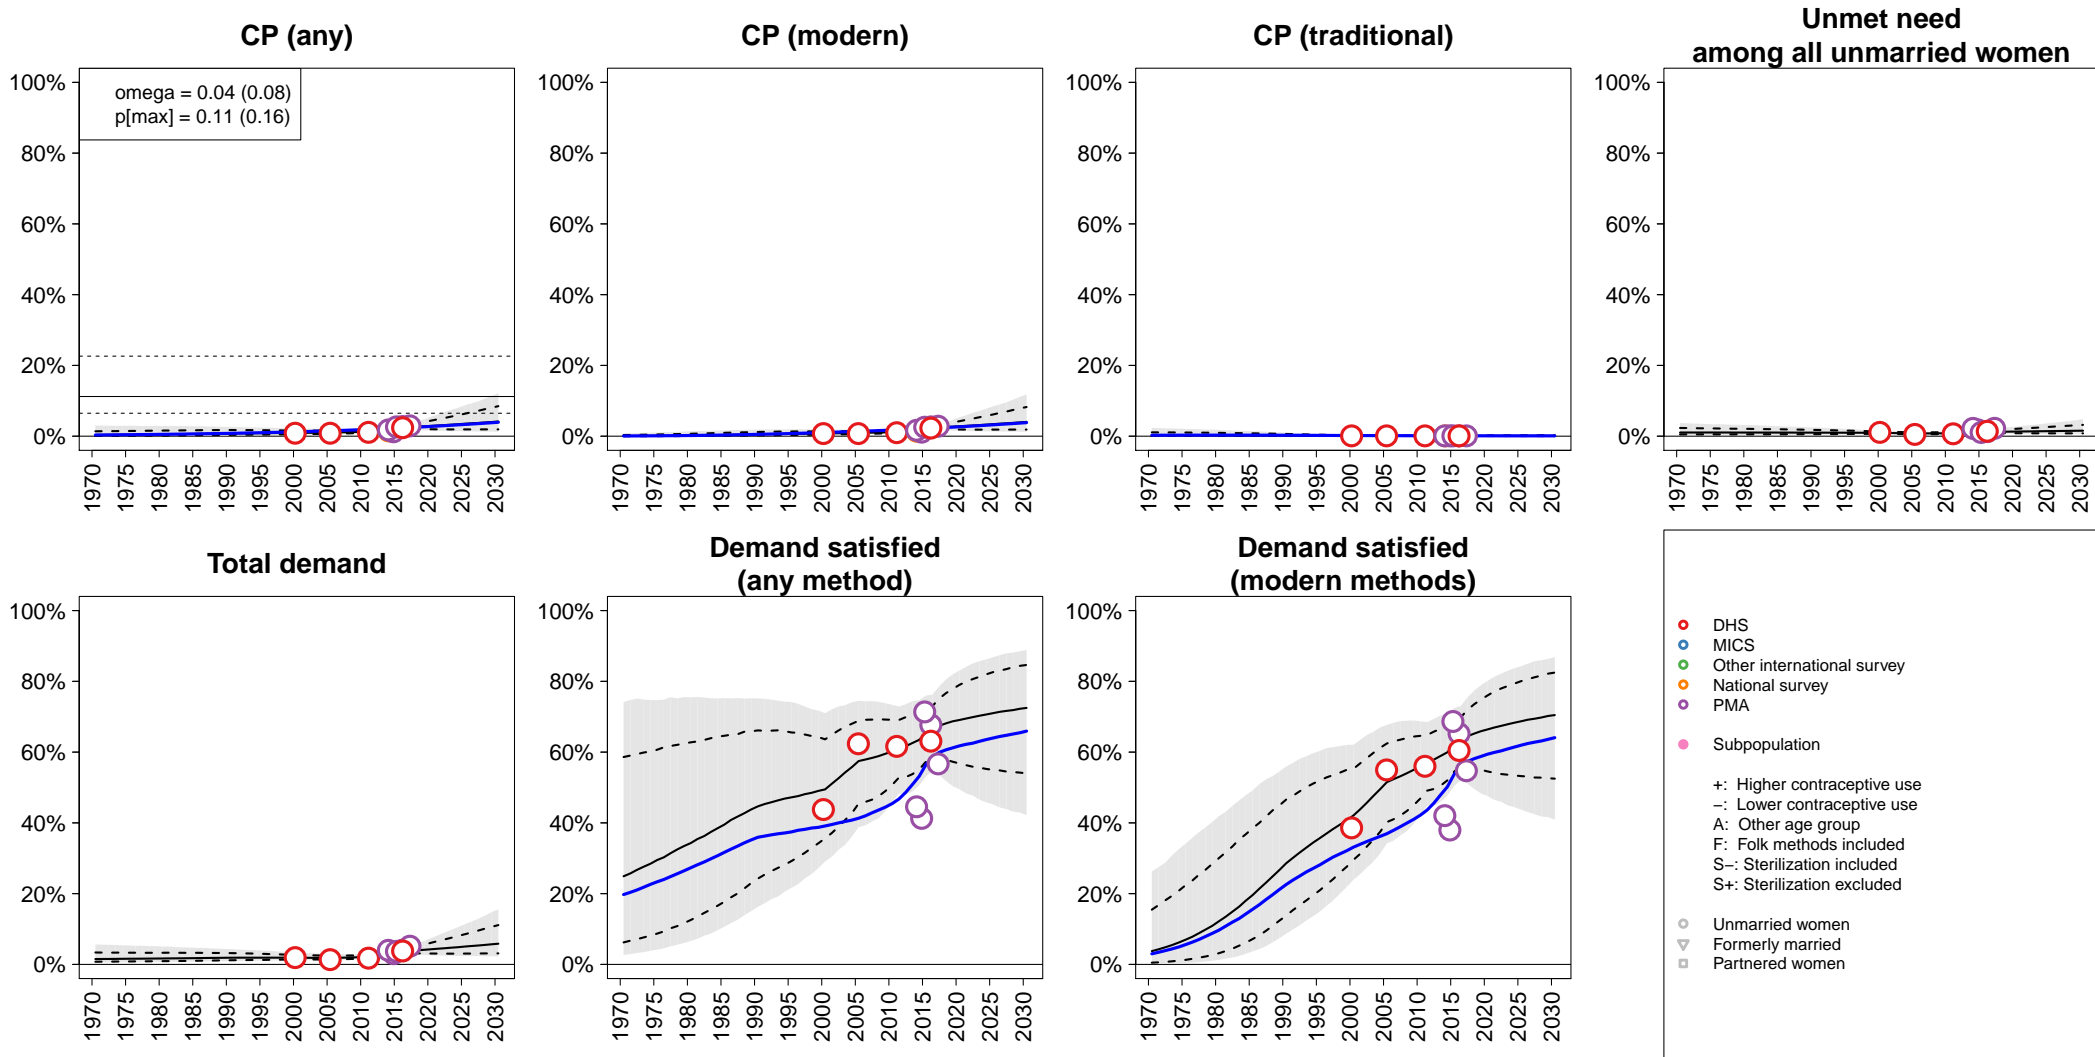

Gabon (Middle Africa, SA Group 1) --- Unmarried / Not In-Union

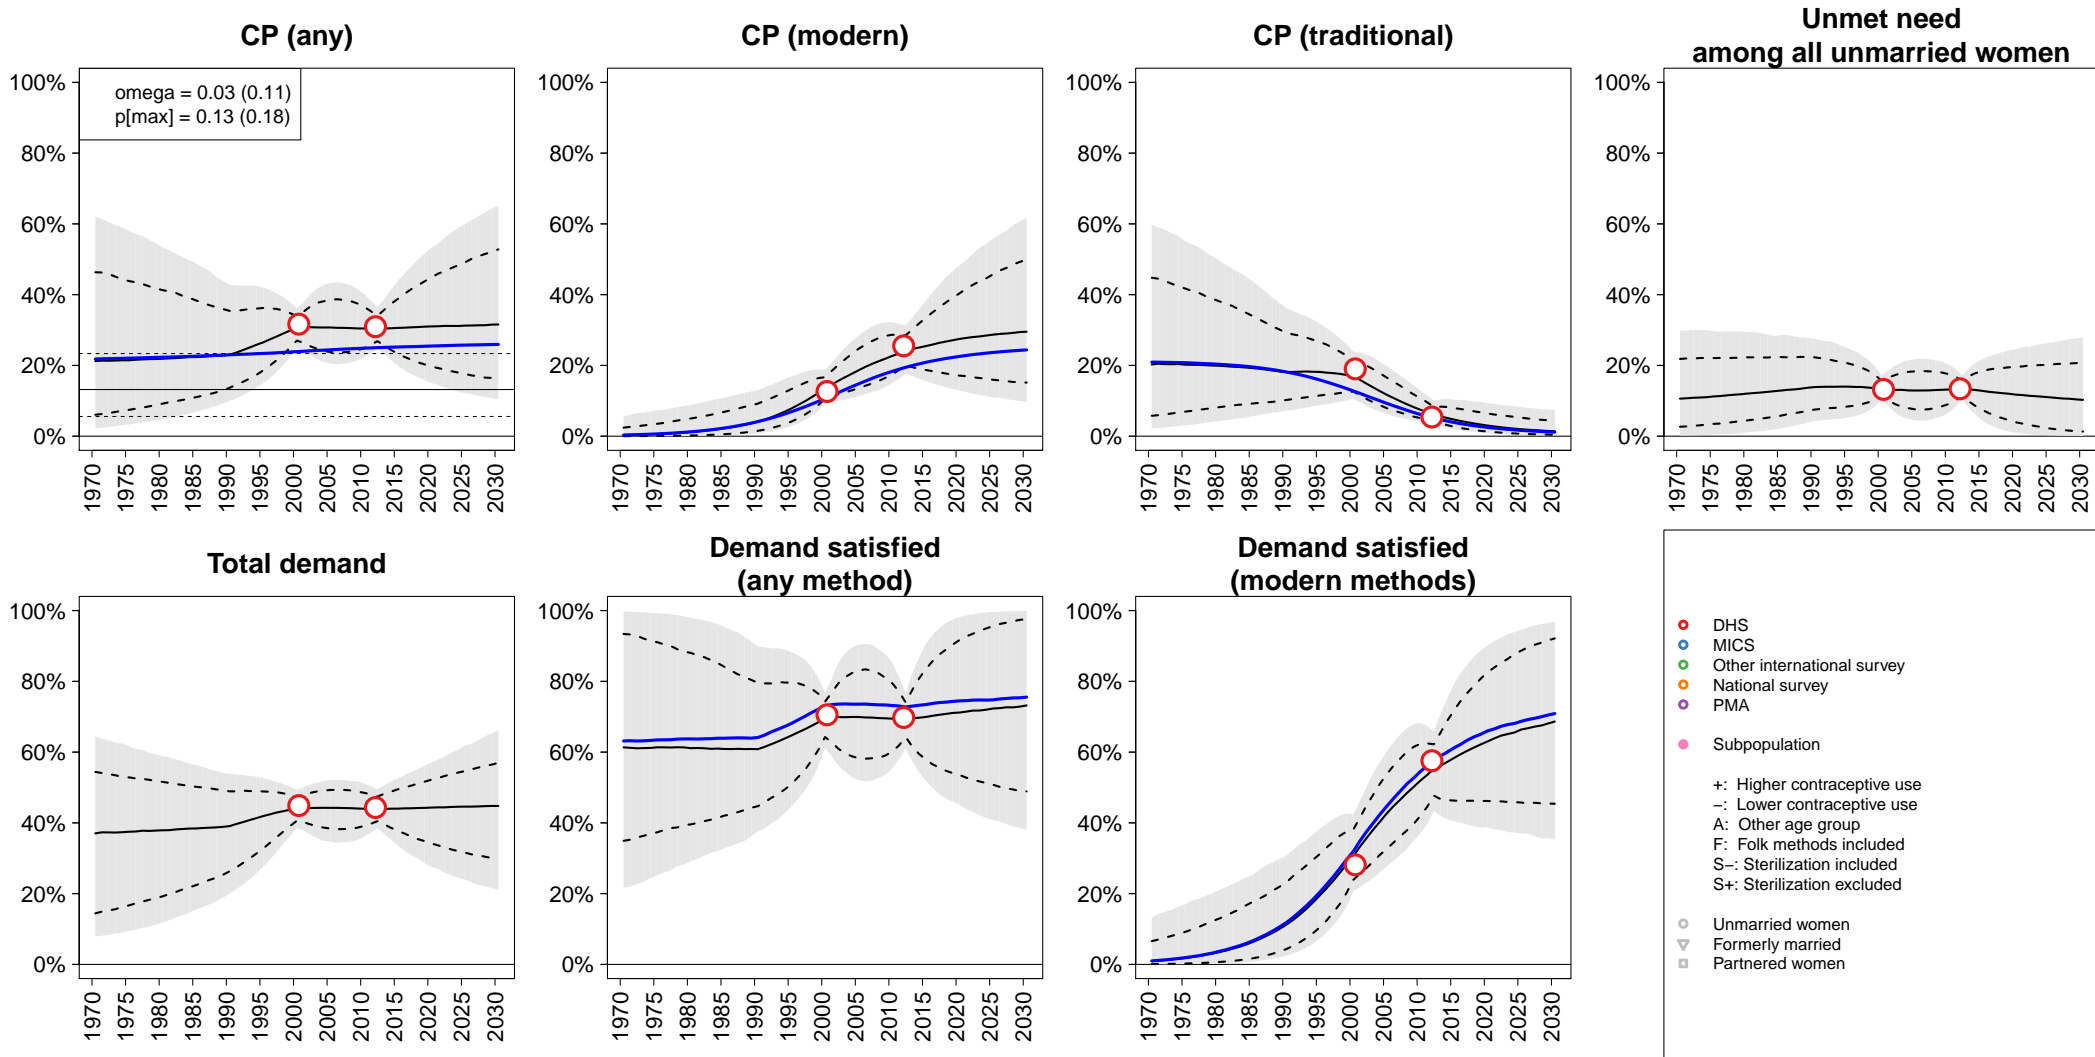

Gambia (Western Africa, SA Group 1) --- Unmarried / Not In-Union

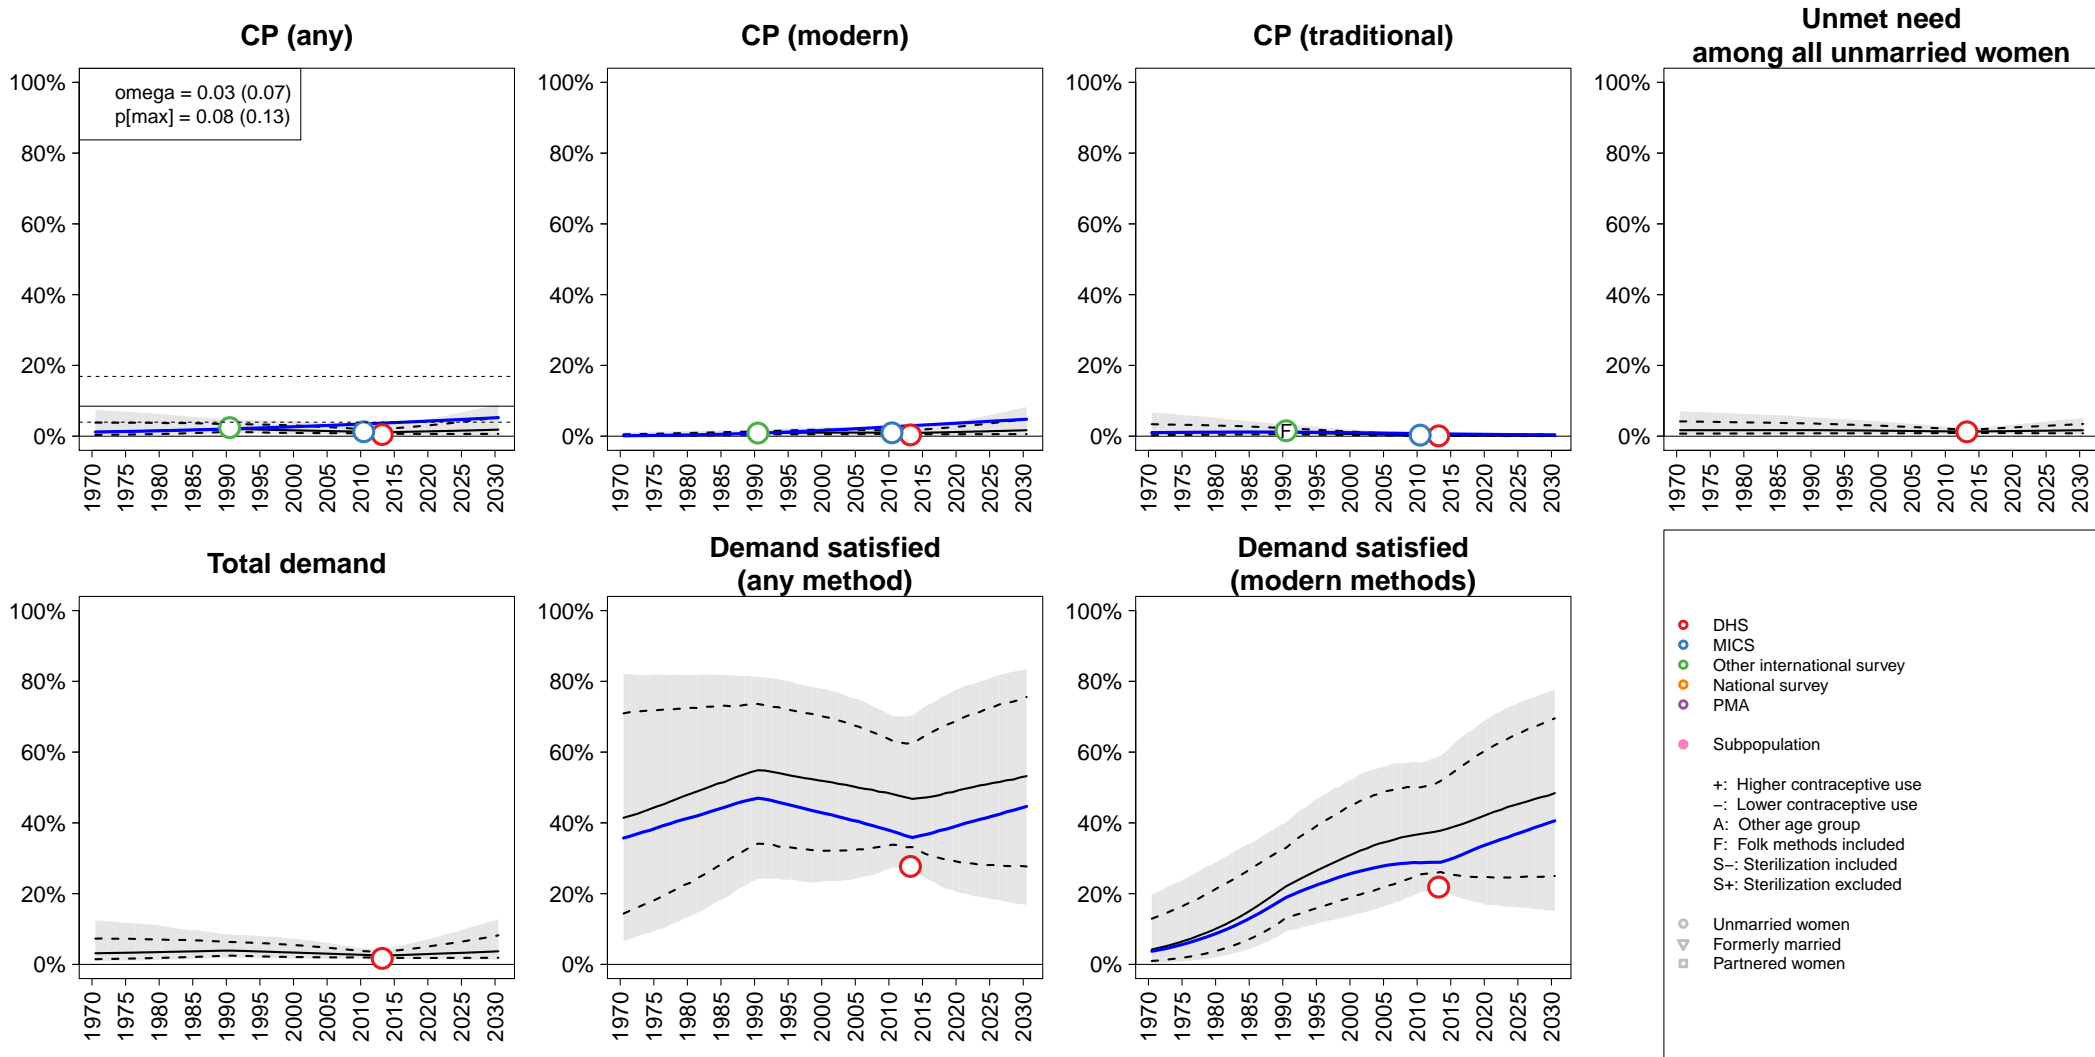

Ghana (Western Africa, SA Group 1) --- Unmarried / Not In-Union

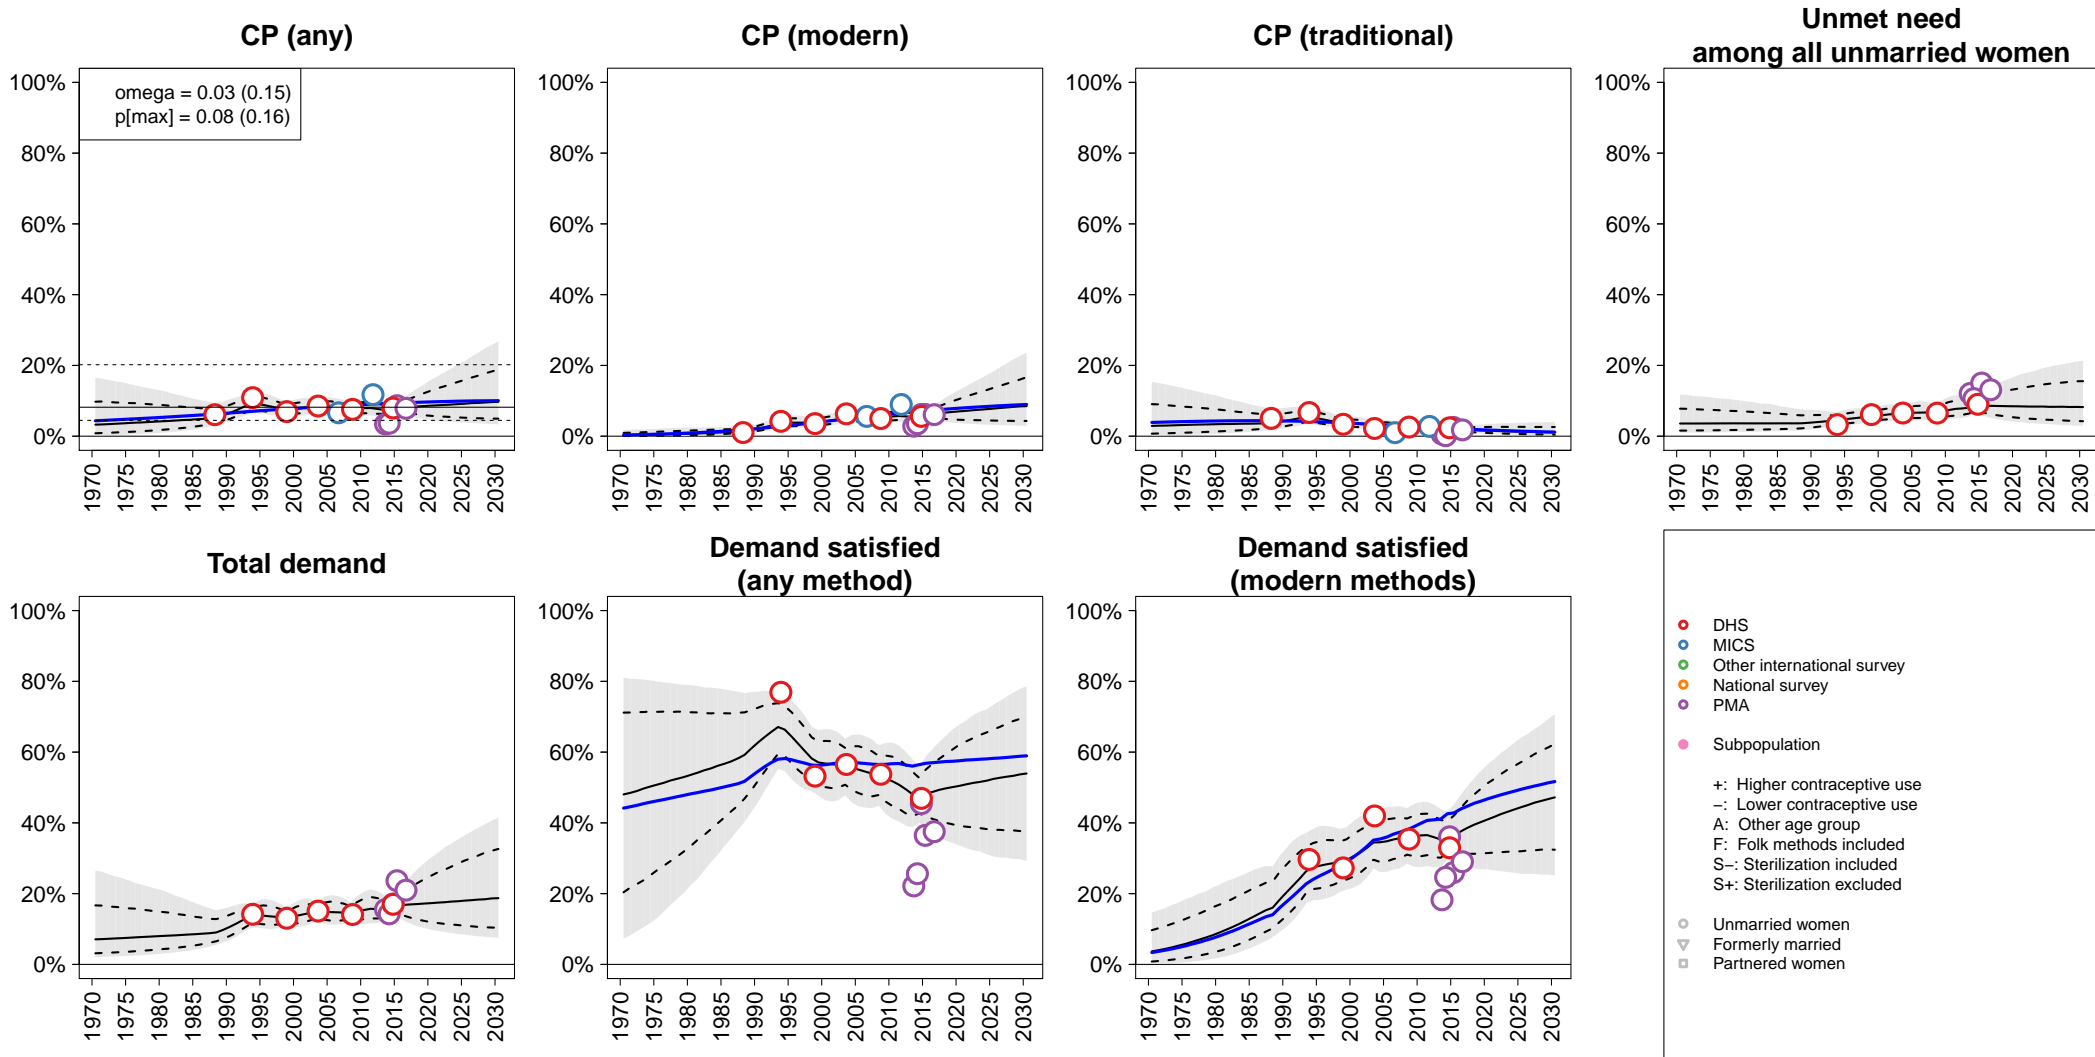



Guatemala (Central America, SA Group 1) --- Unmarried / Not In-Union

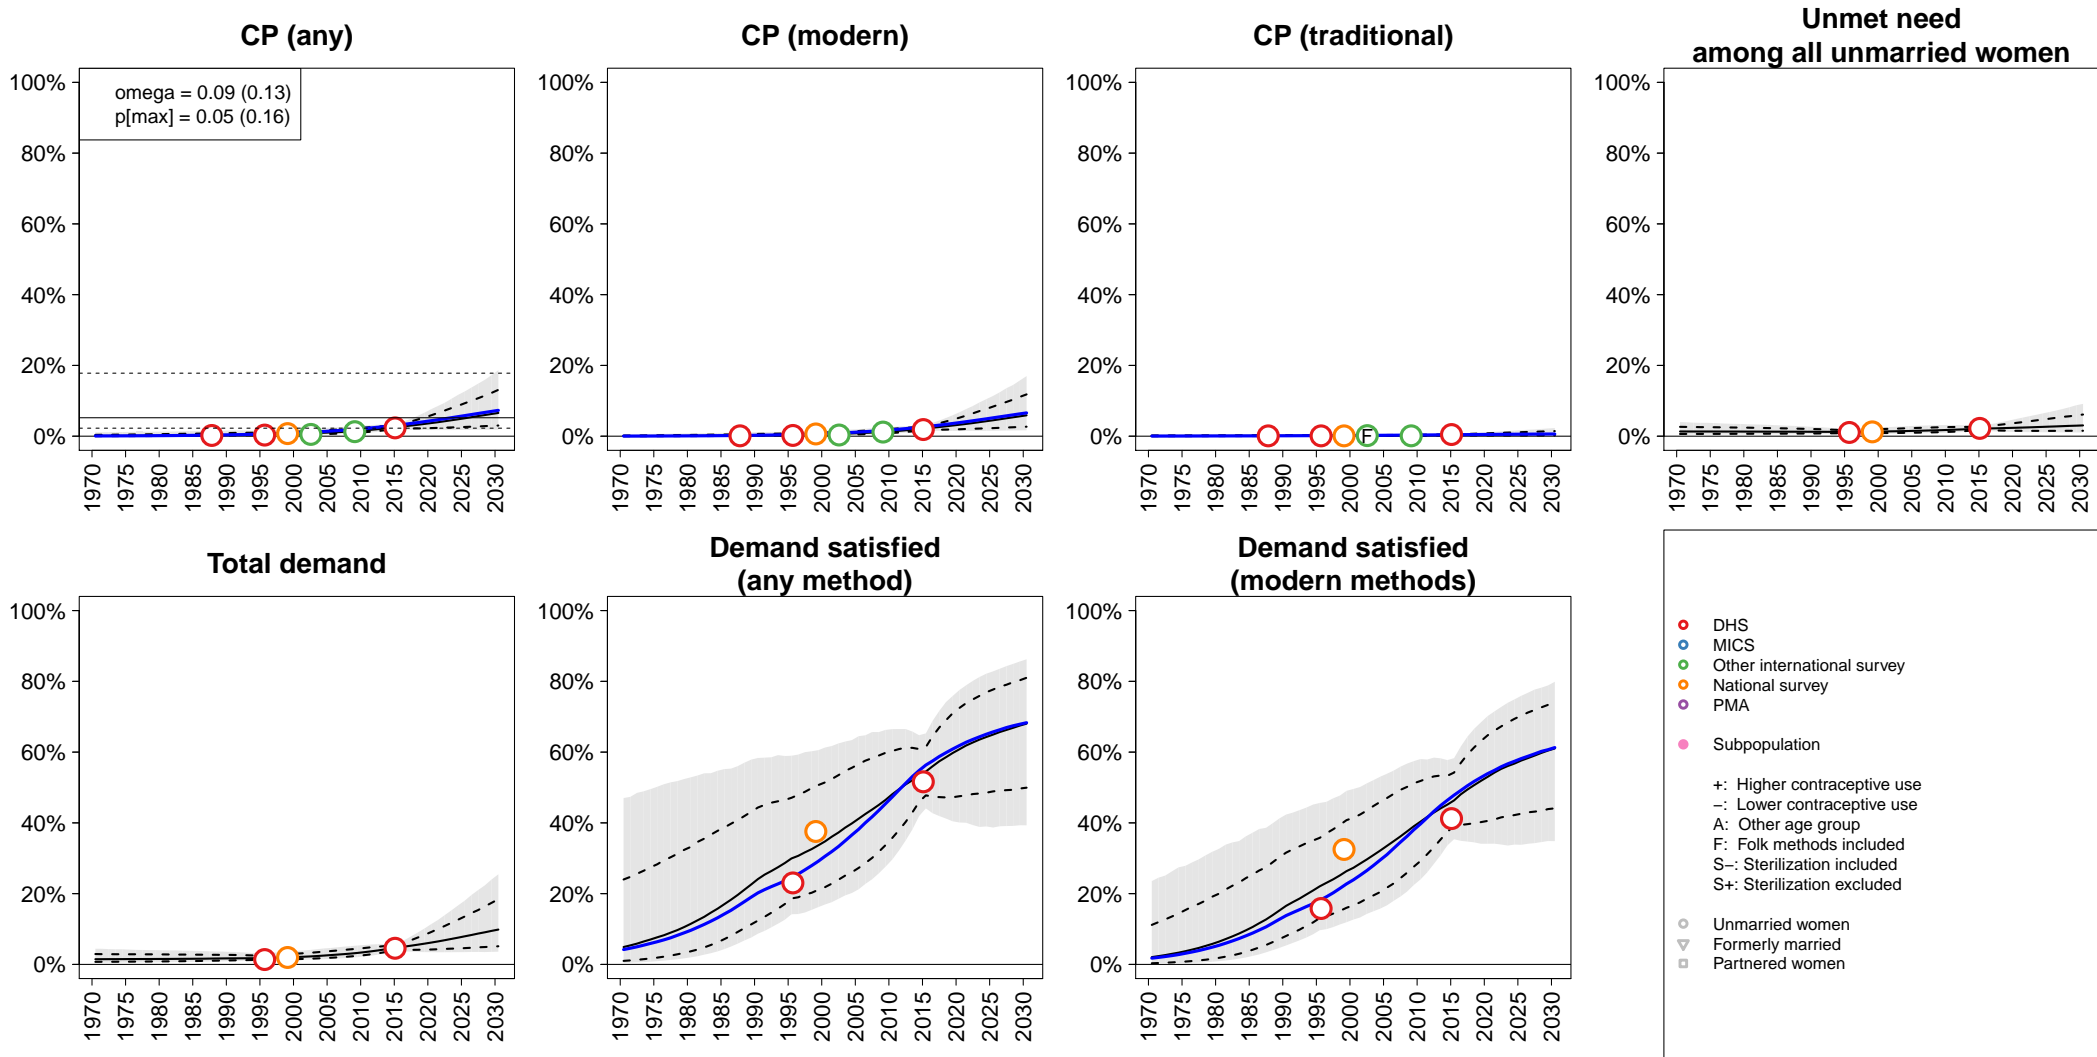

Guinea-Bissau (Western Africa, SA Group 1) --- Unmarried / Not In-Union

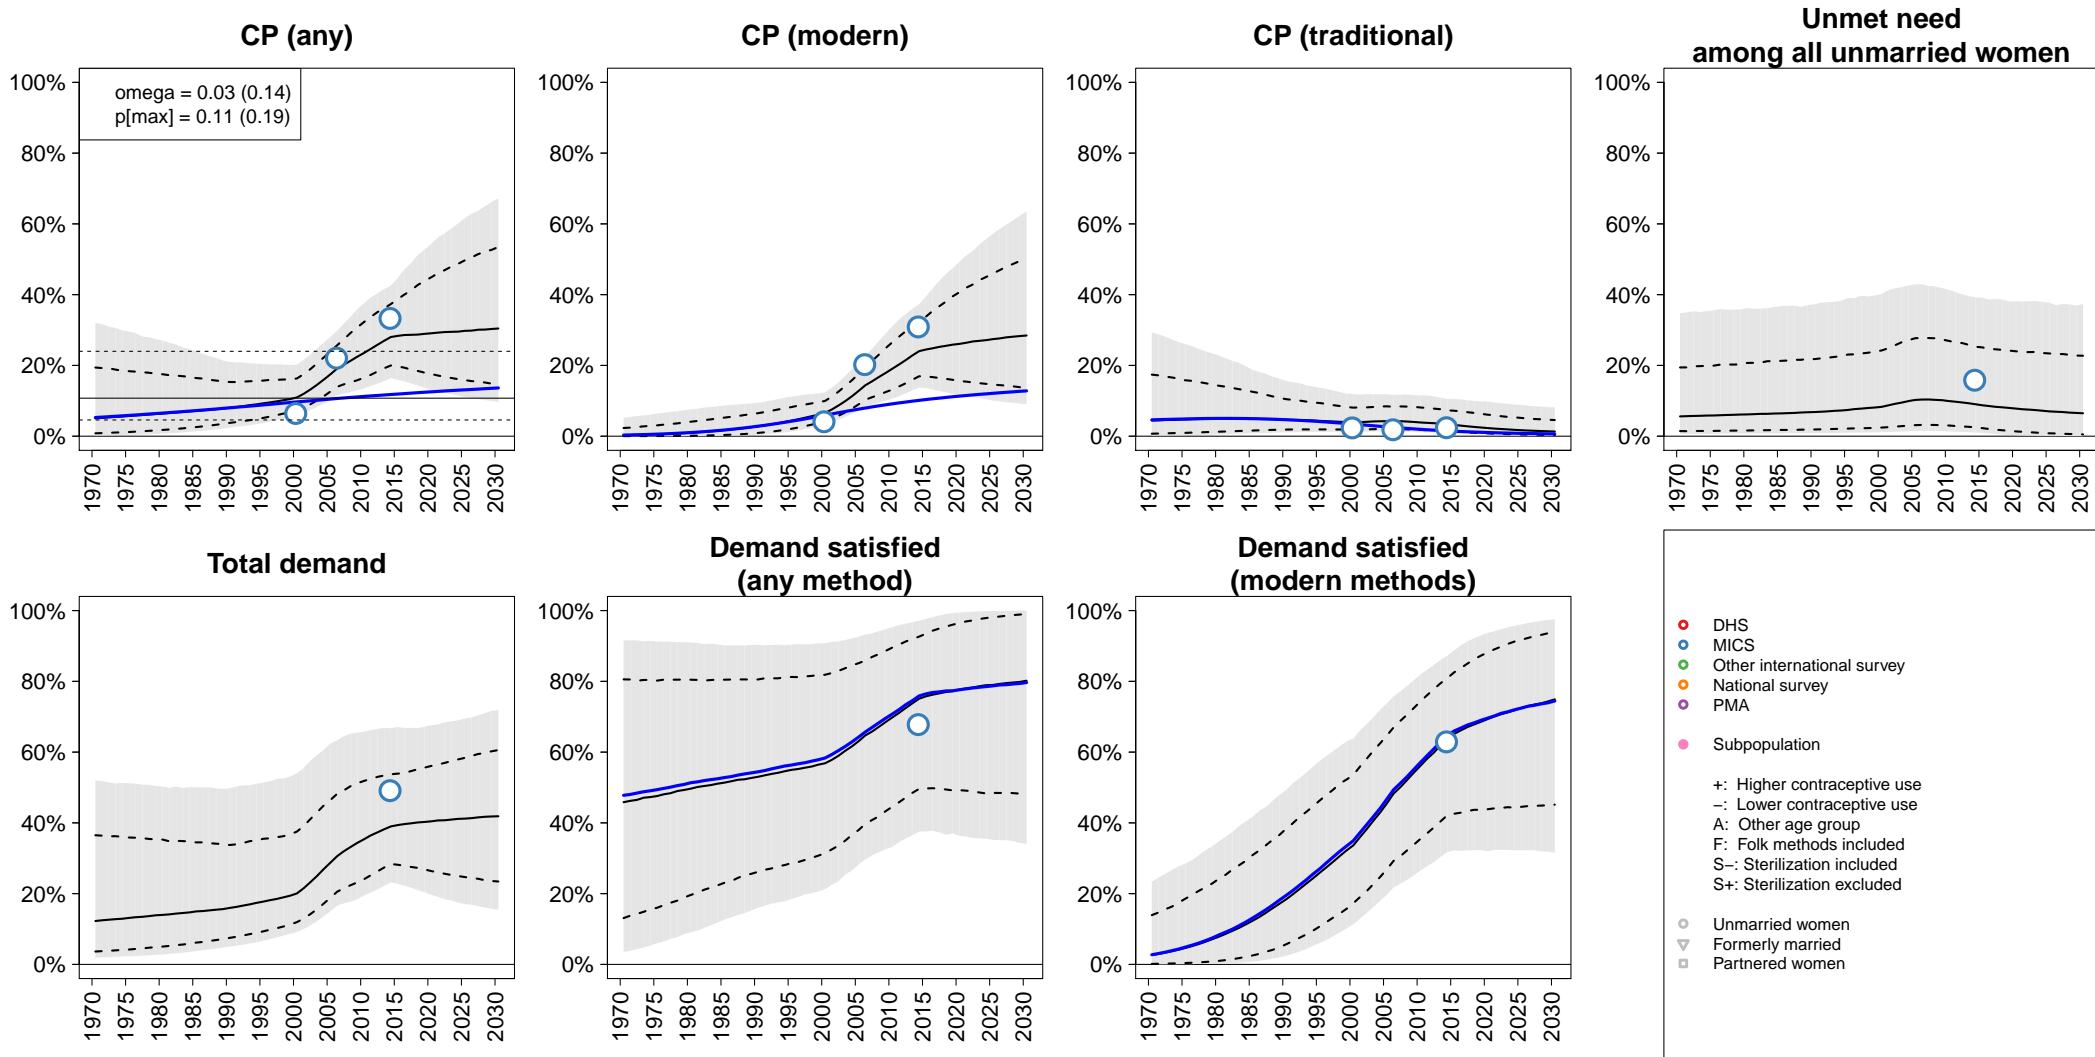

Guinea (Western Africa, SA Group 1) --- Unmarried / Not In-Union

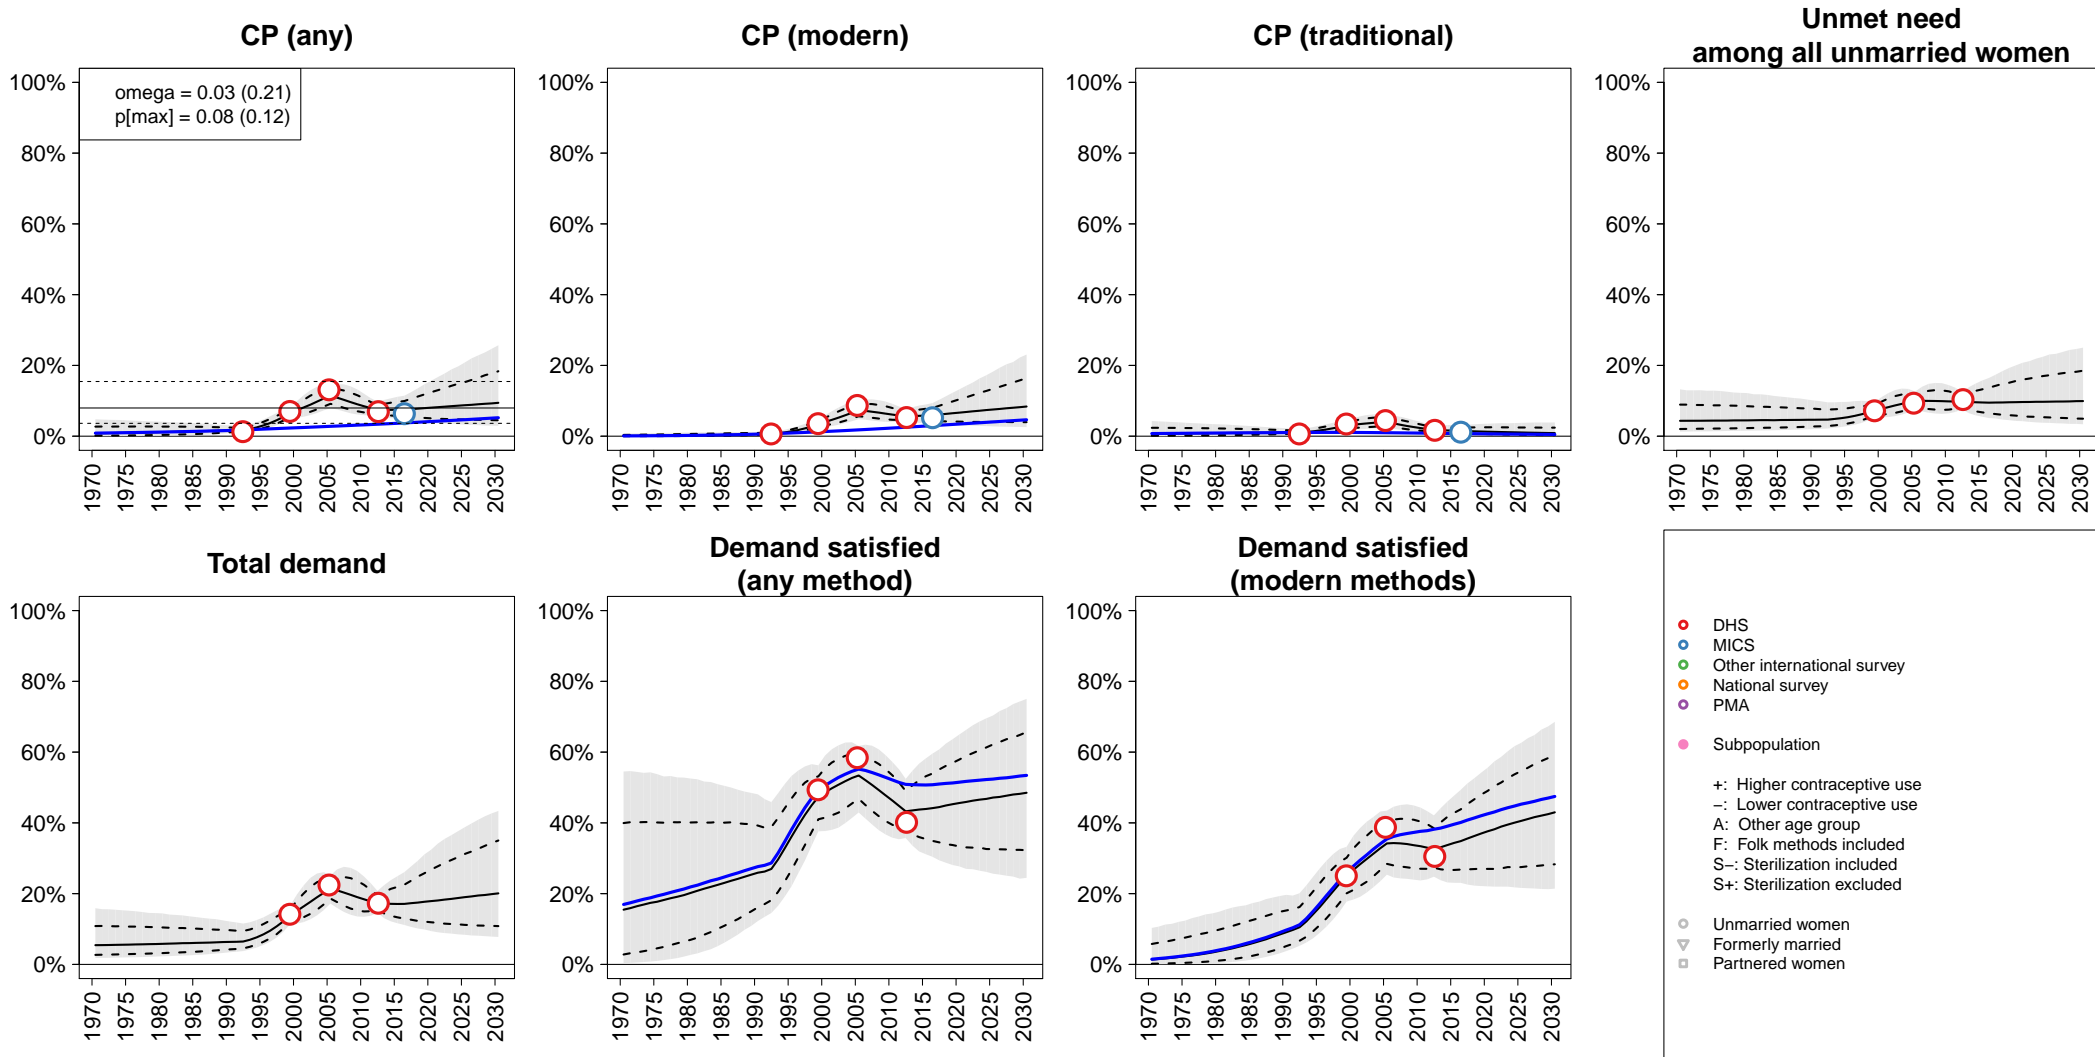

Guyana (South America, SA Group 1) --- Unmarried / Not In-Union

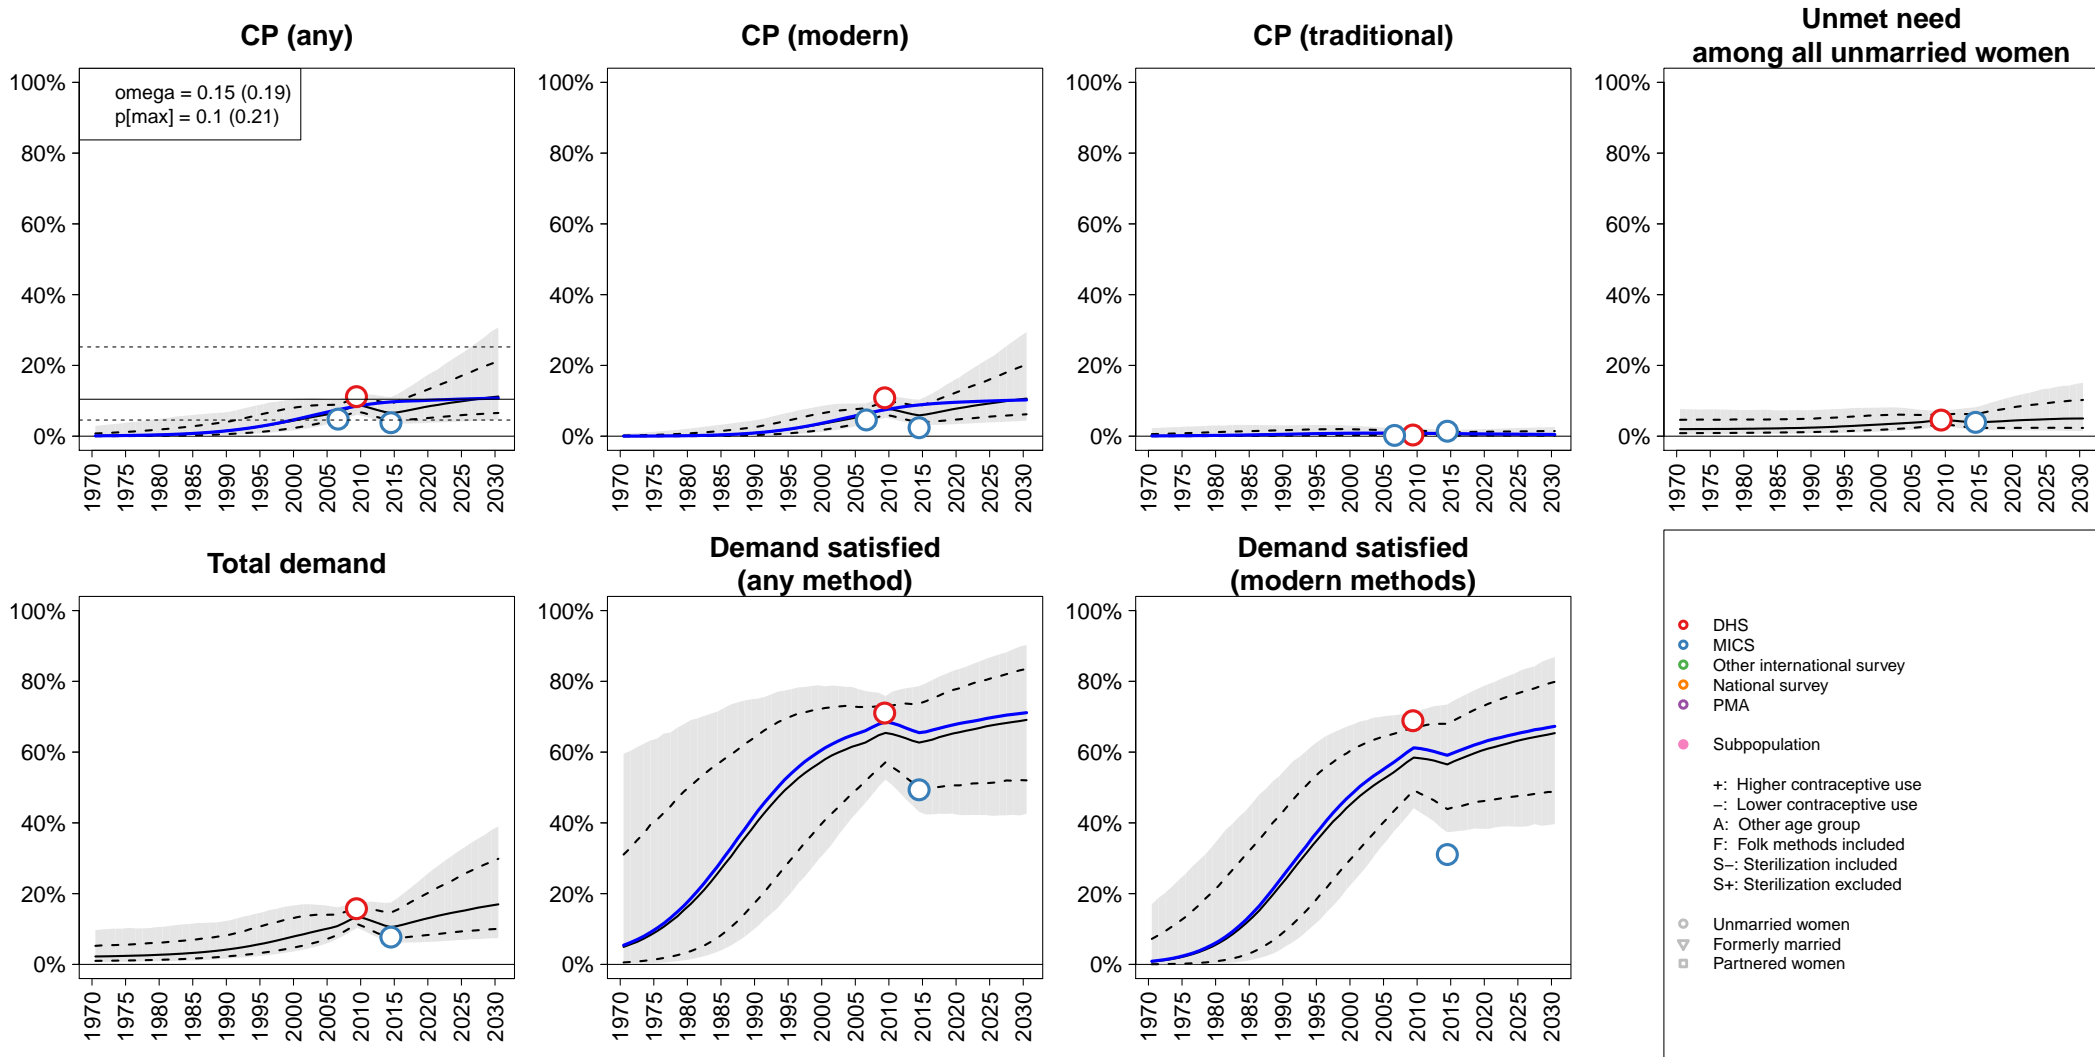

Haiti (Caribbean, SA Group 1) --- Unmarried / Not In-Union

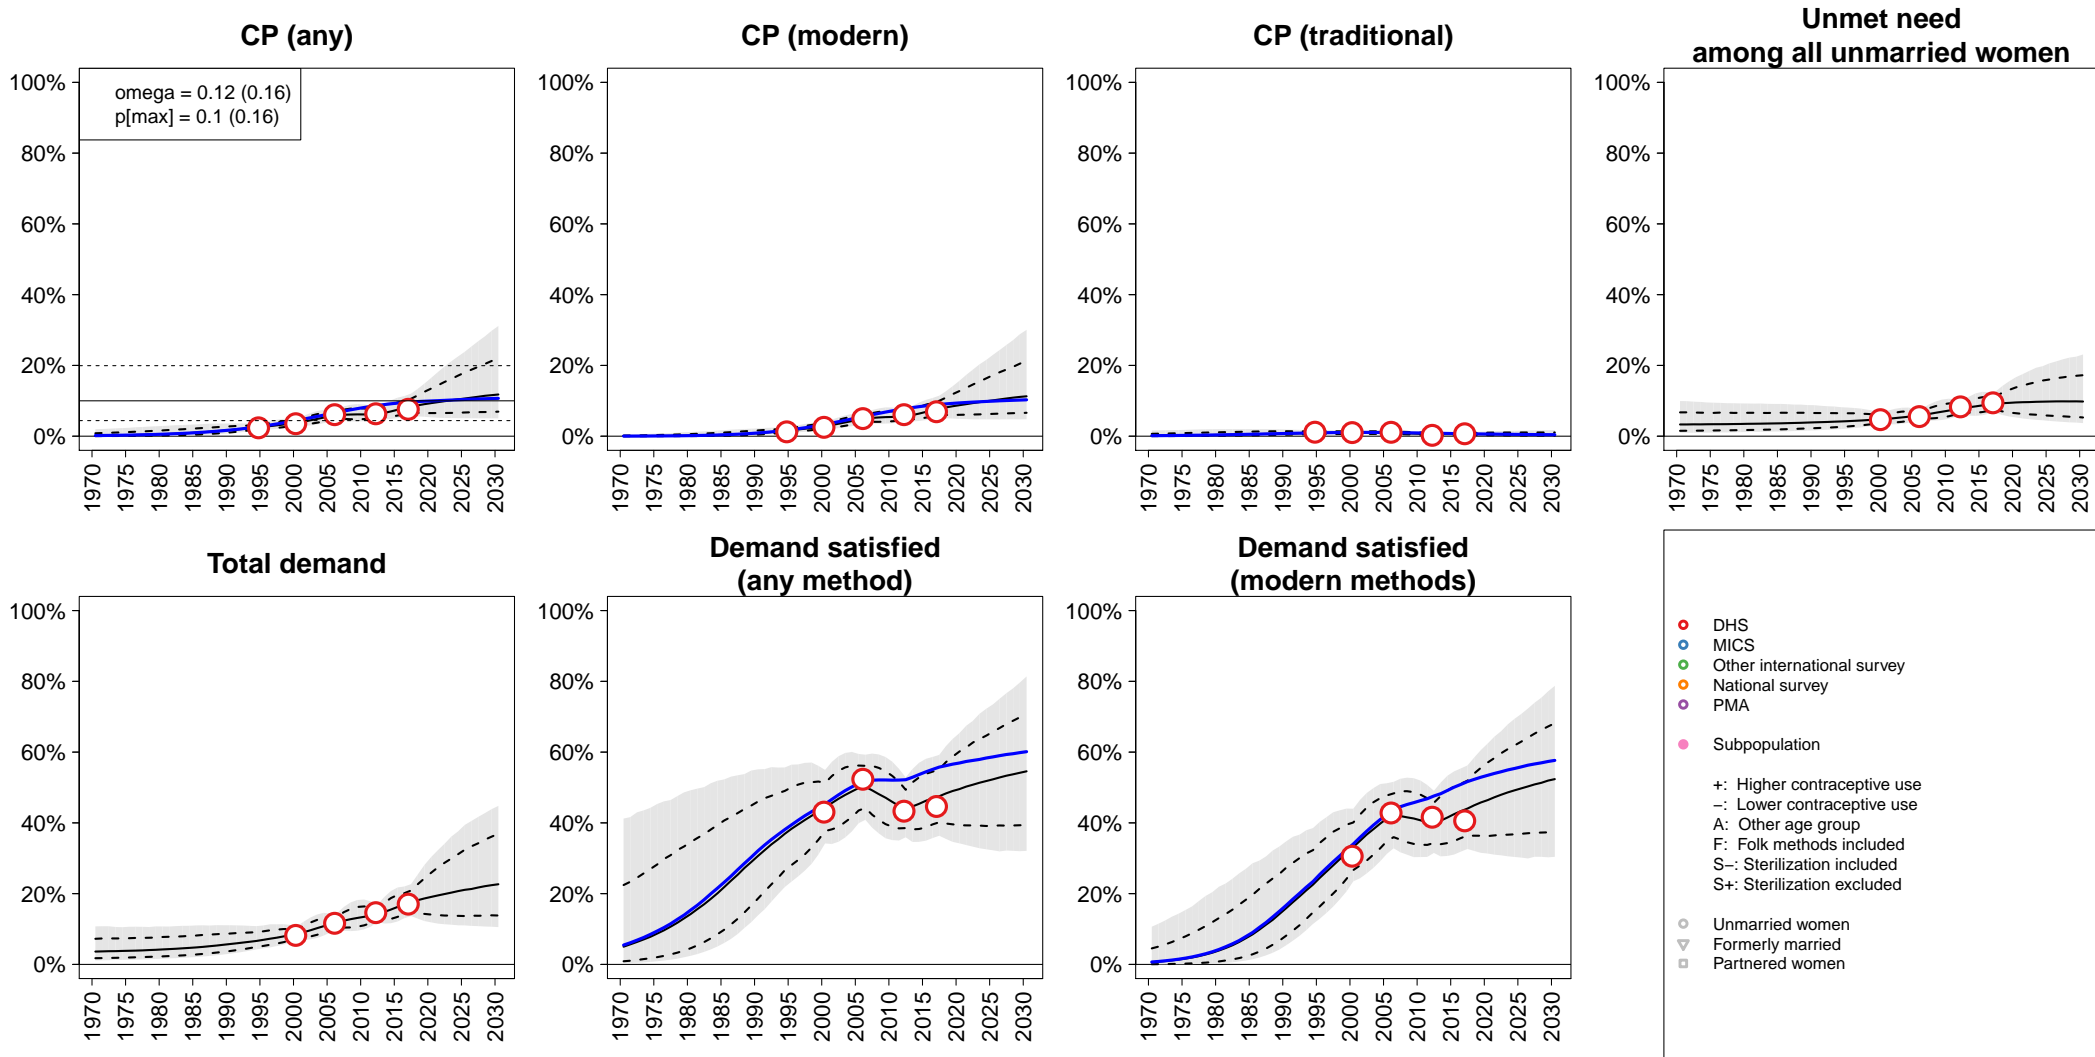

Honduras (Central America, SA Group 1) --- Unmarried / Not In-Union

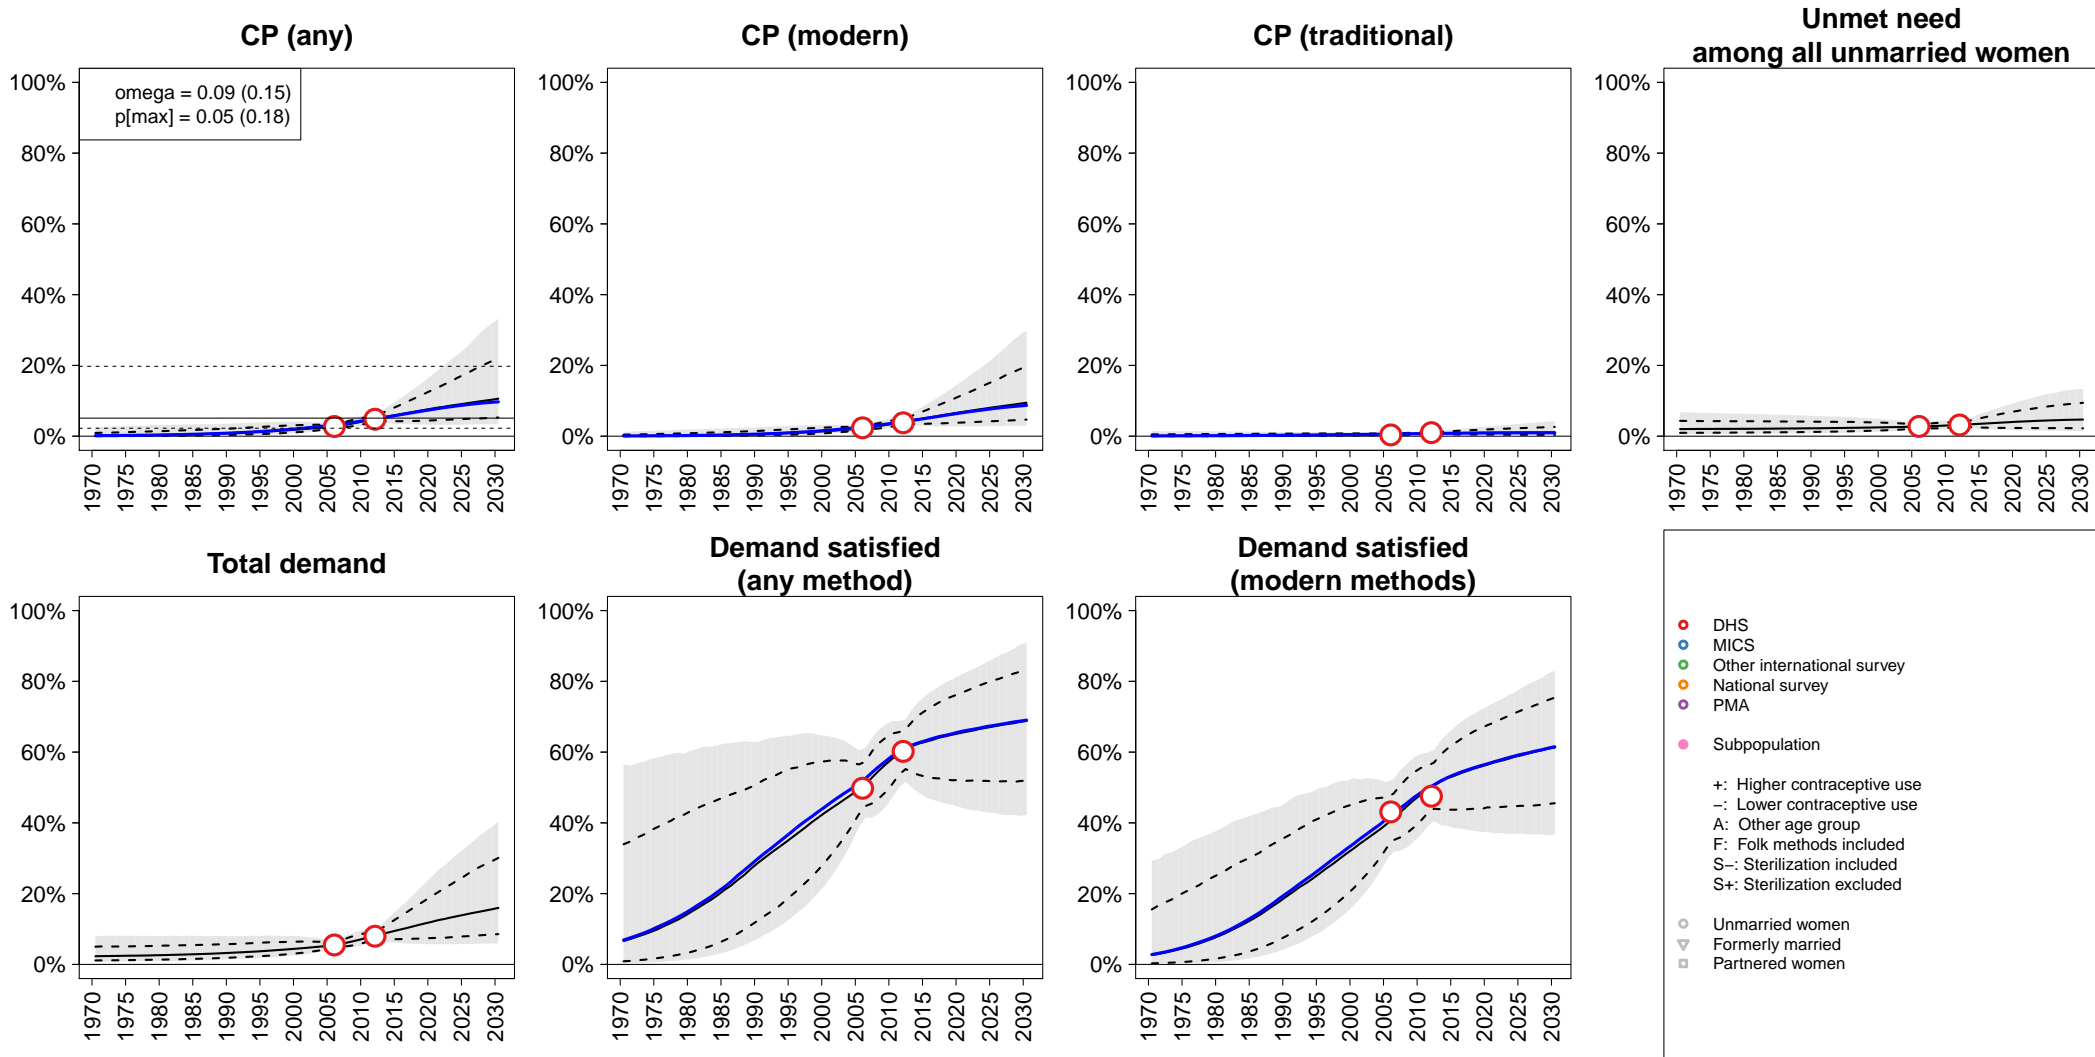

India (Southern Asia, SA Group 0) --- Unmarried / Not In-Union

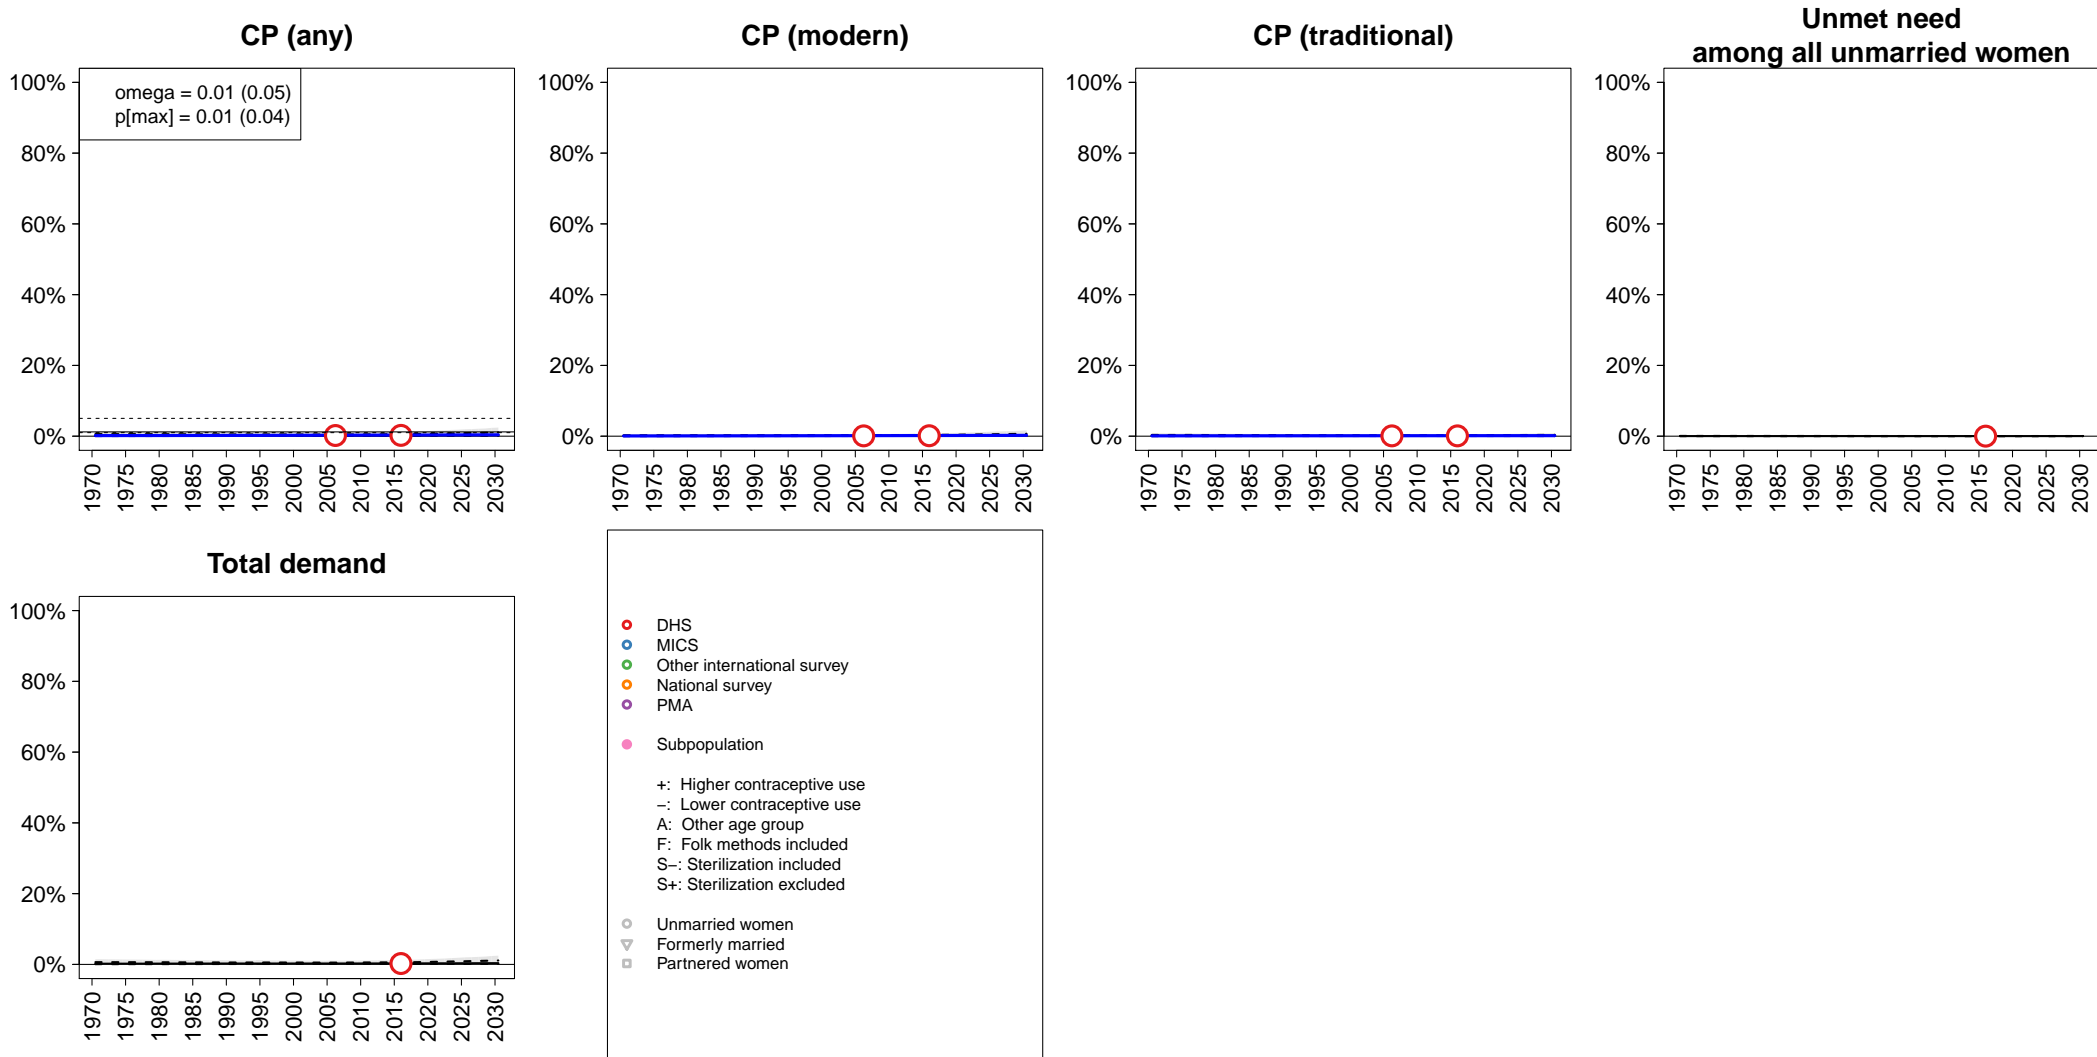

Indonesia (South-eastern Asia, SA Group 0) --- Unmarried / Not In-Union

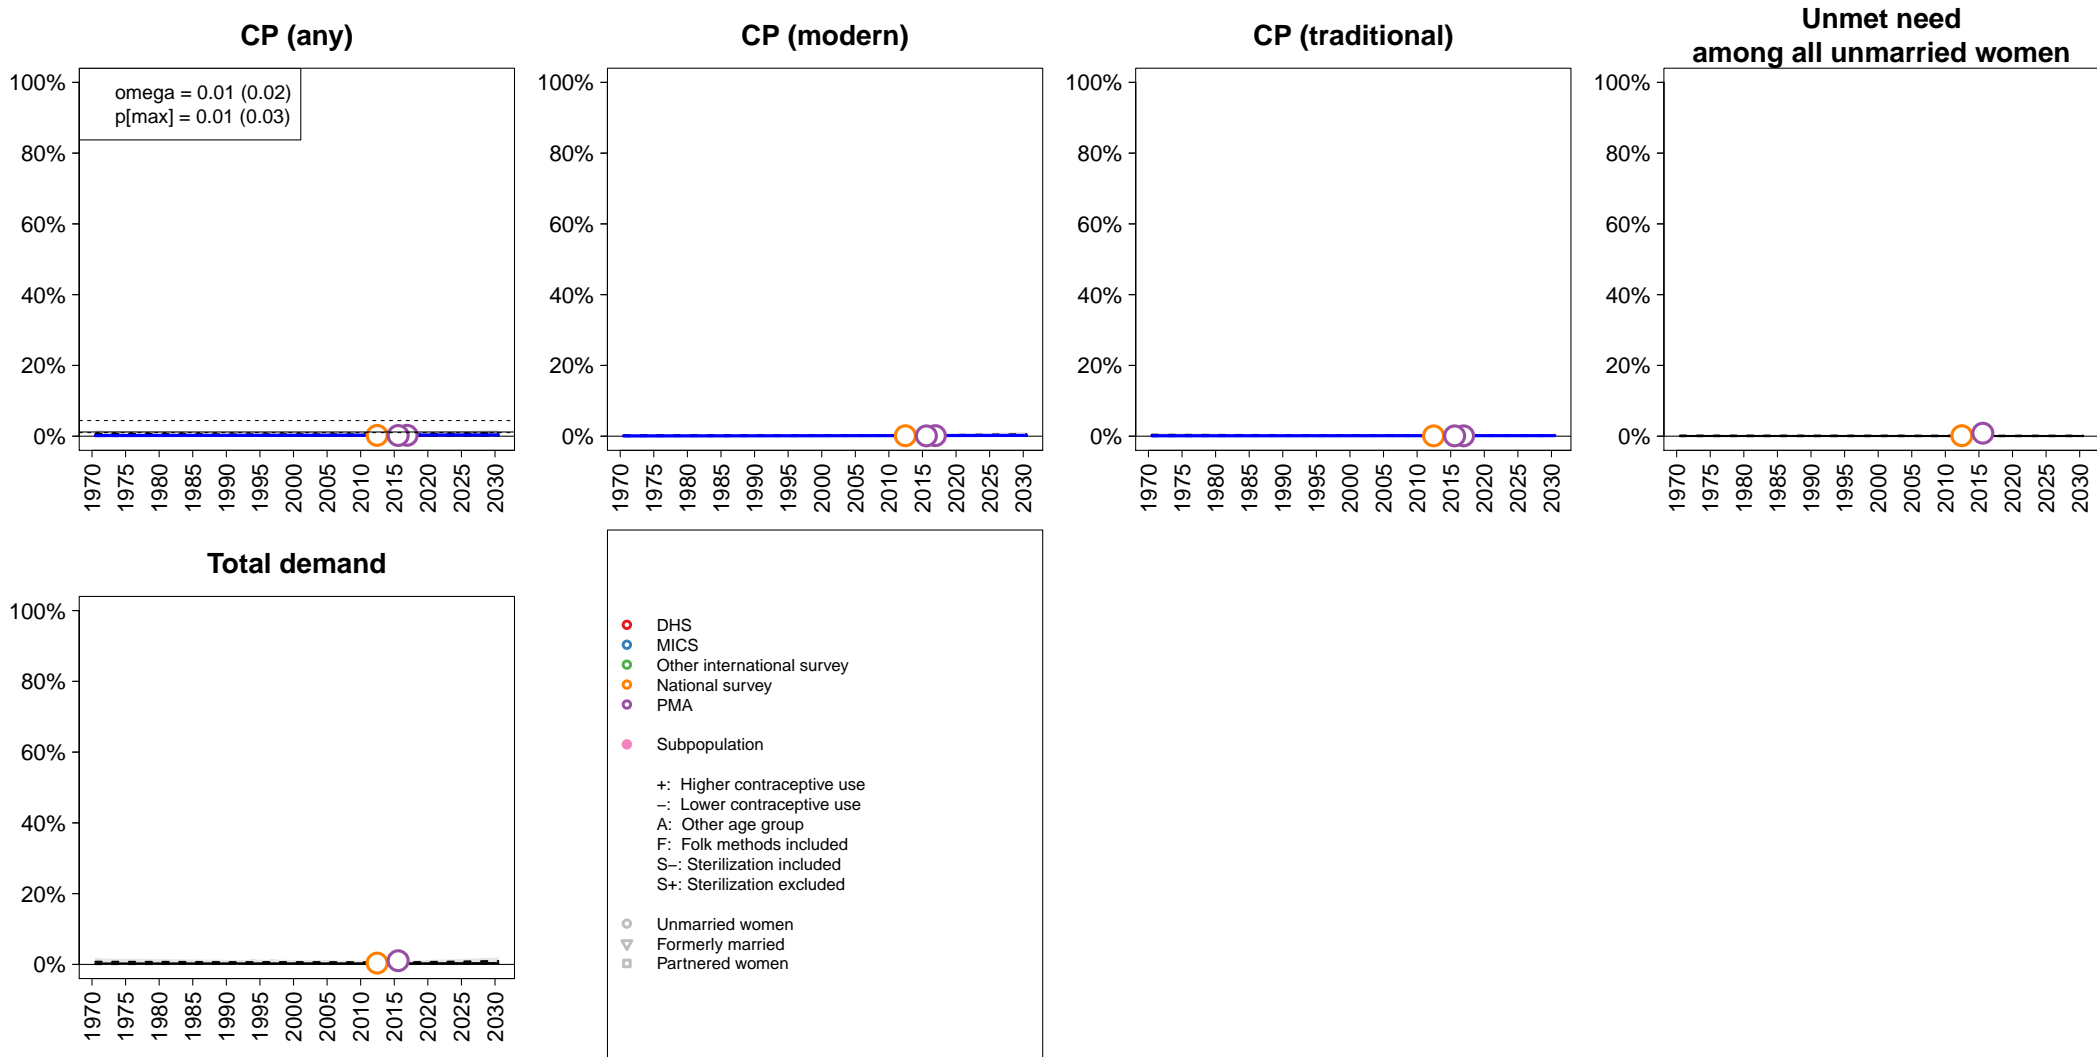



Jamaica (Caribbean, SA Group 1) --- Unmarried / Not In-Union

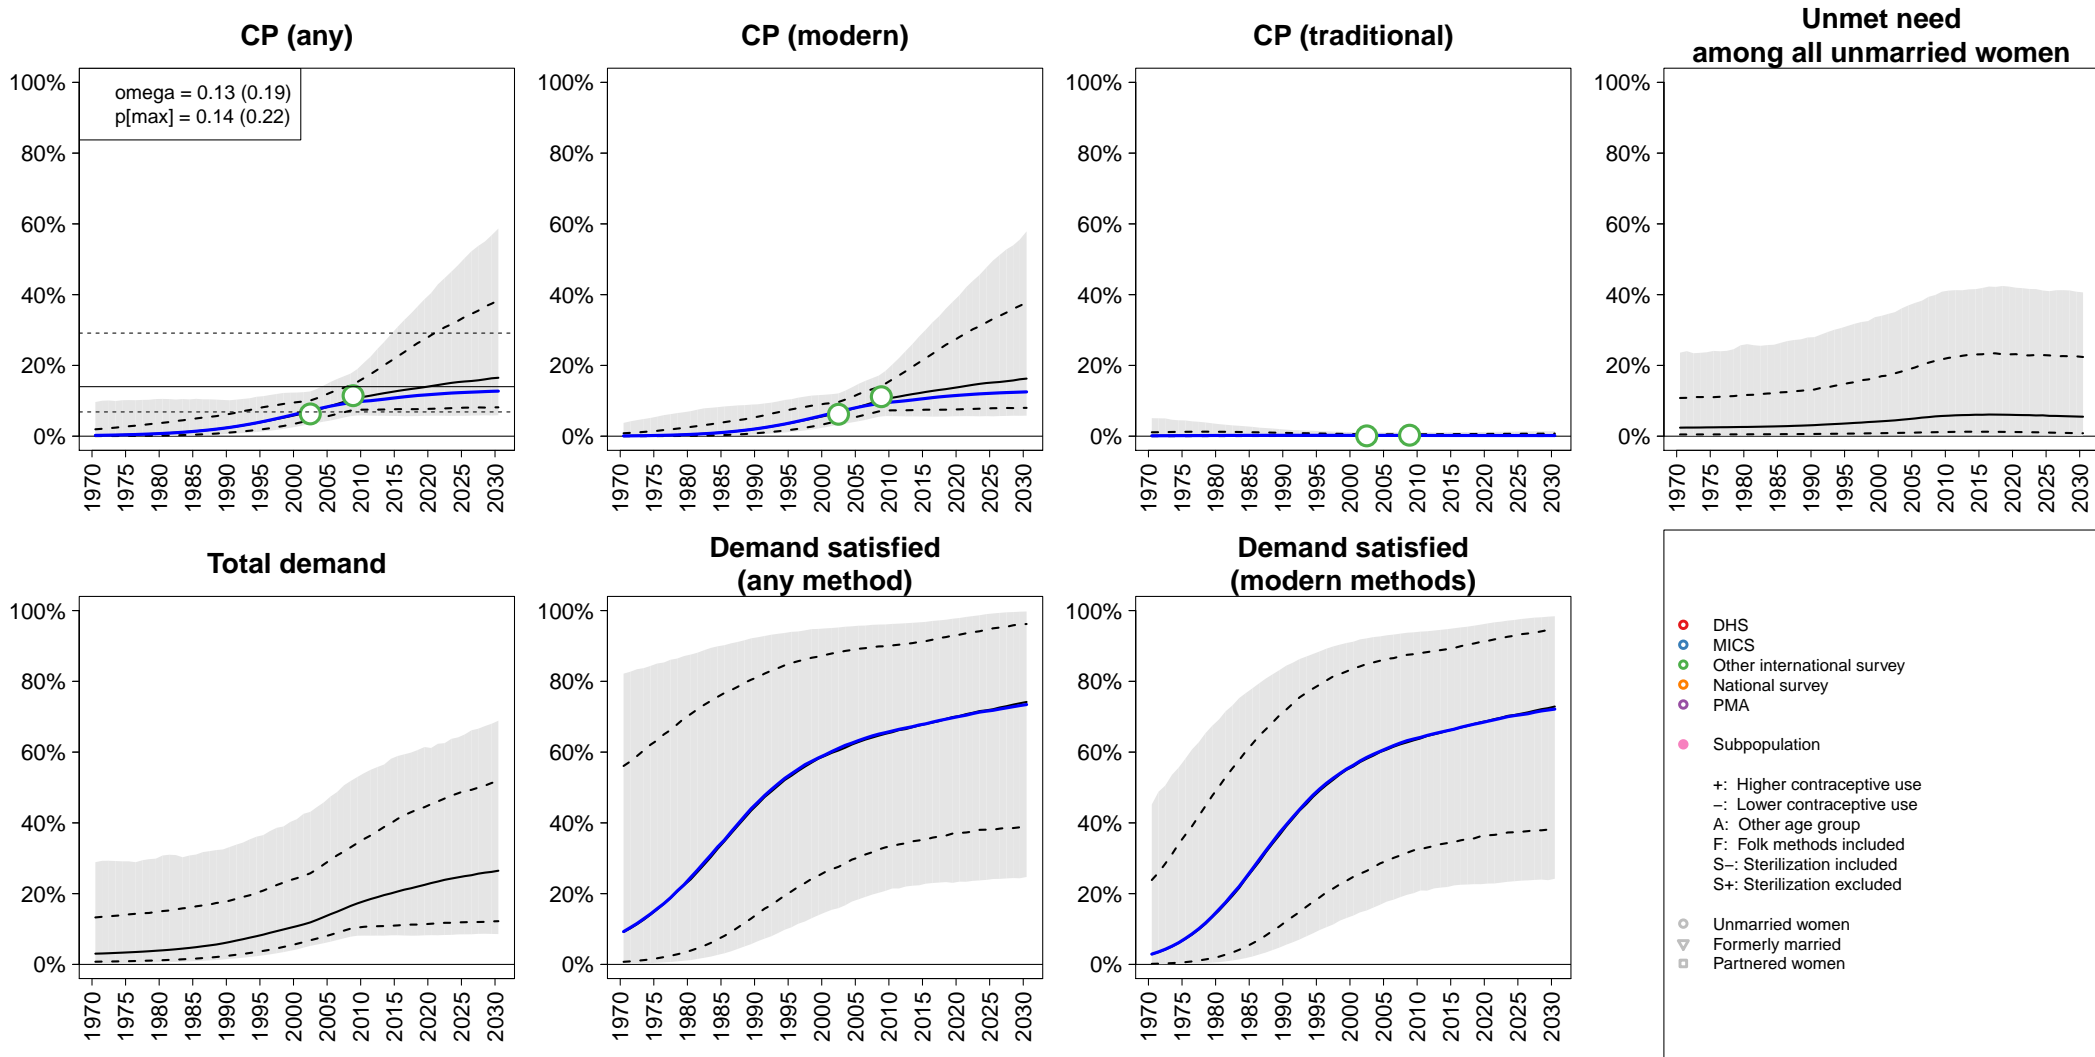

Kazakhstan (Central Asia, SA Group 1) --- Unmarried / Not In-Union

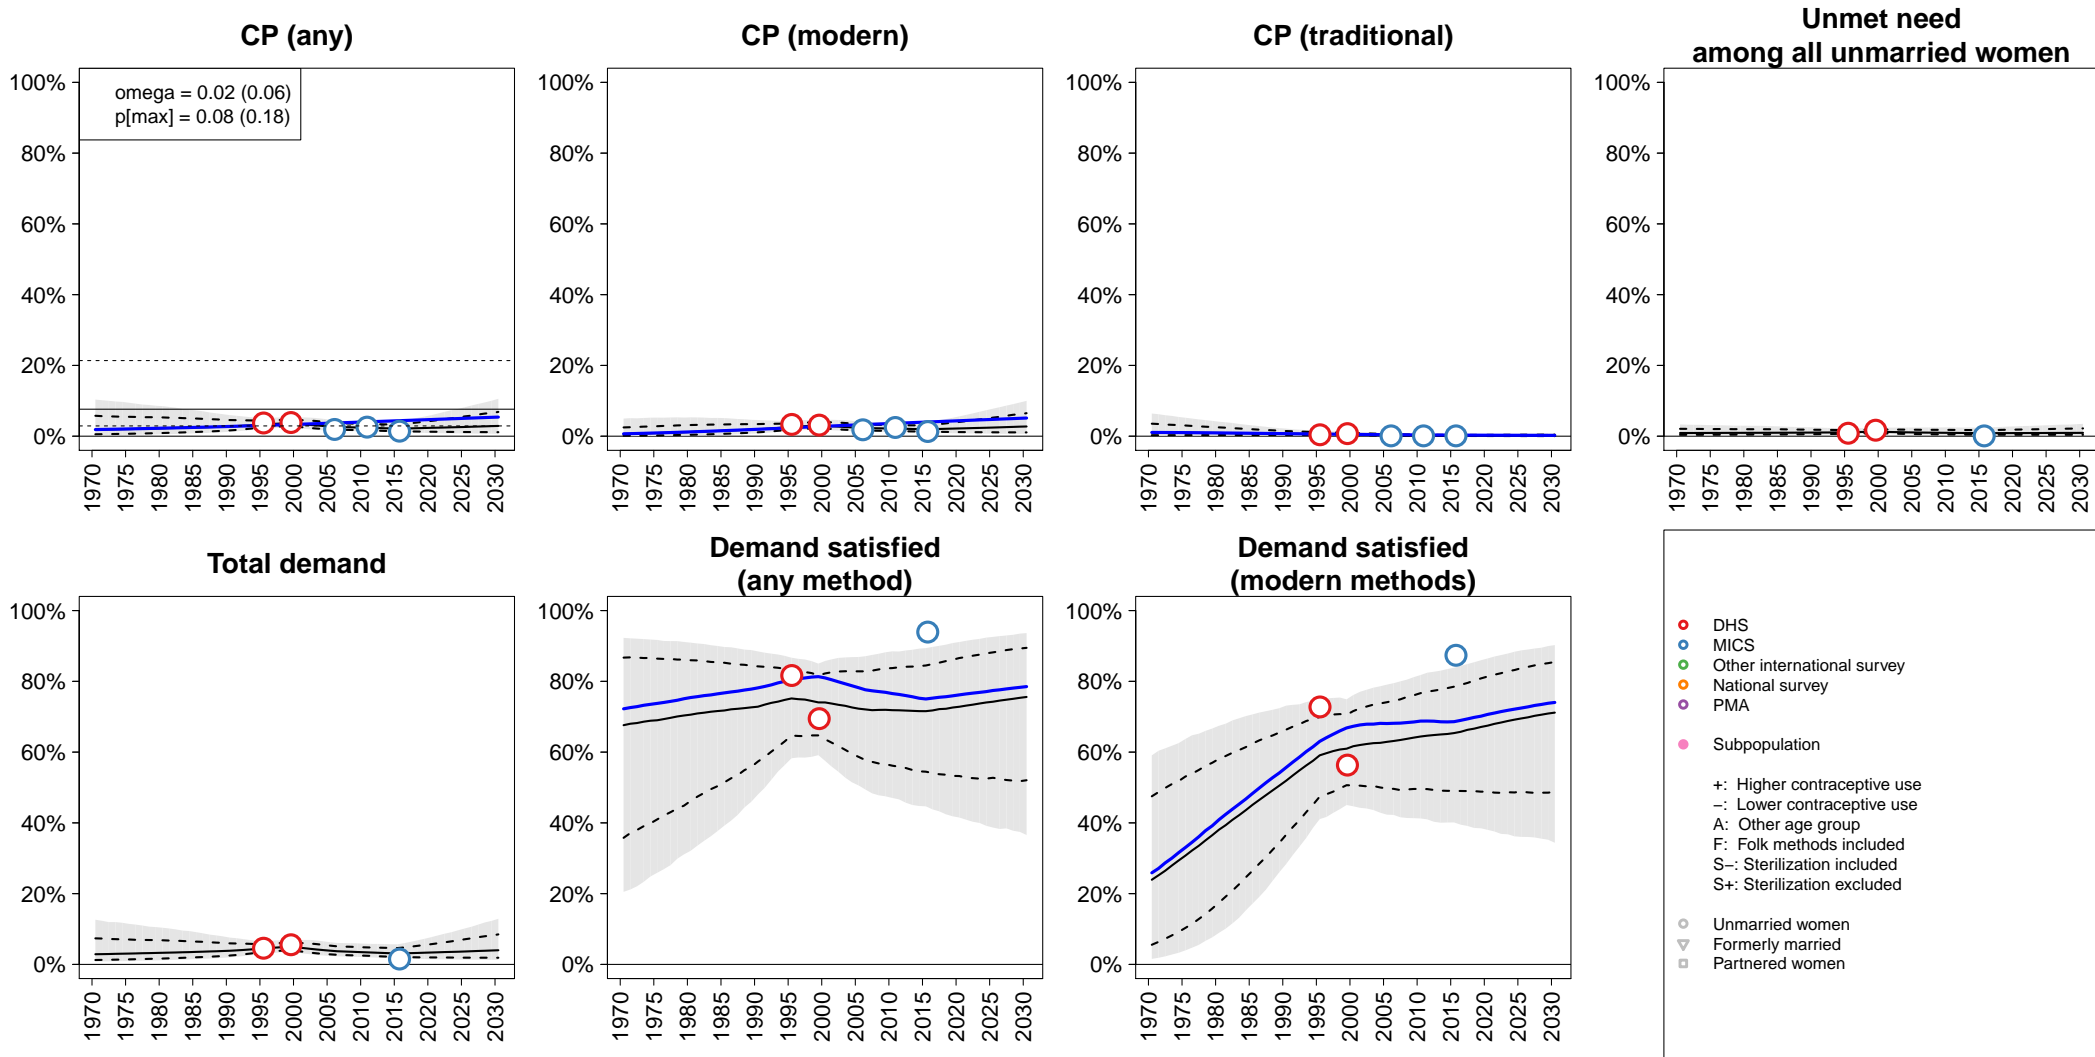

Kenya (Eastern Africa, SA Group 1) --- Unmarried / Not In-Union

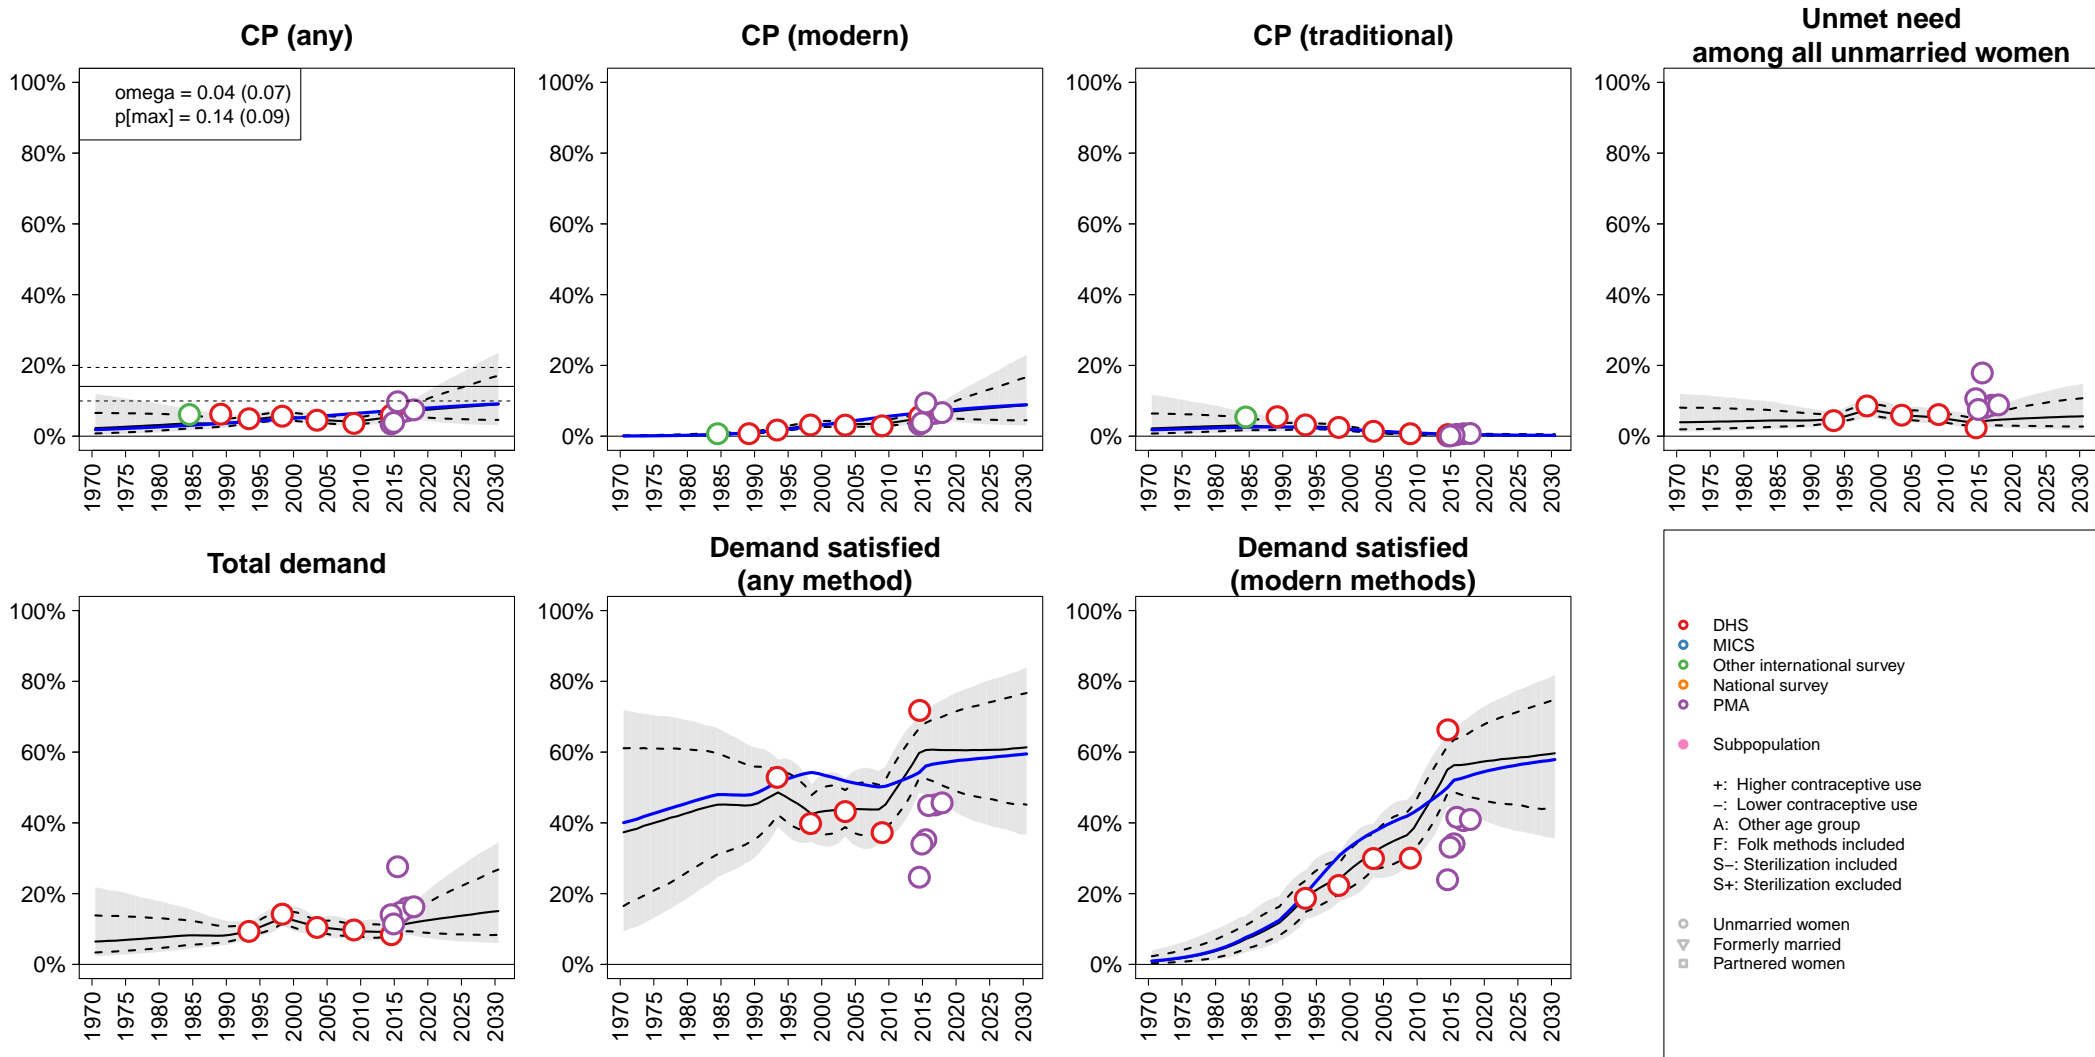

Kyrgyzstan (Central Asia, SA Group 1) --- Unmarried / Not In-Union

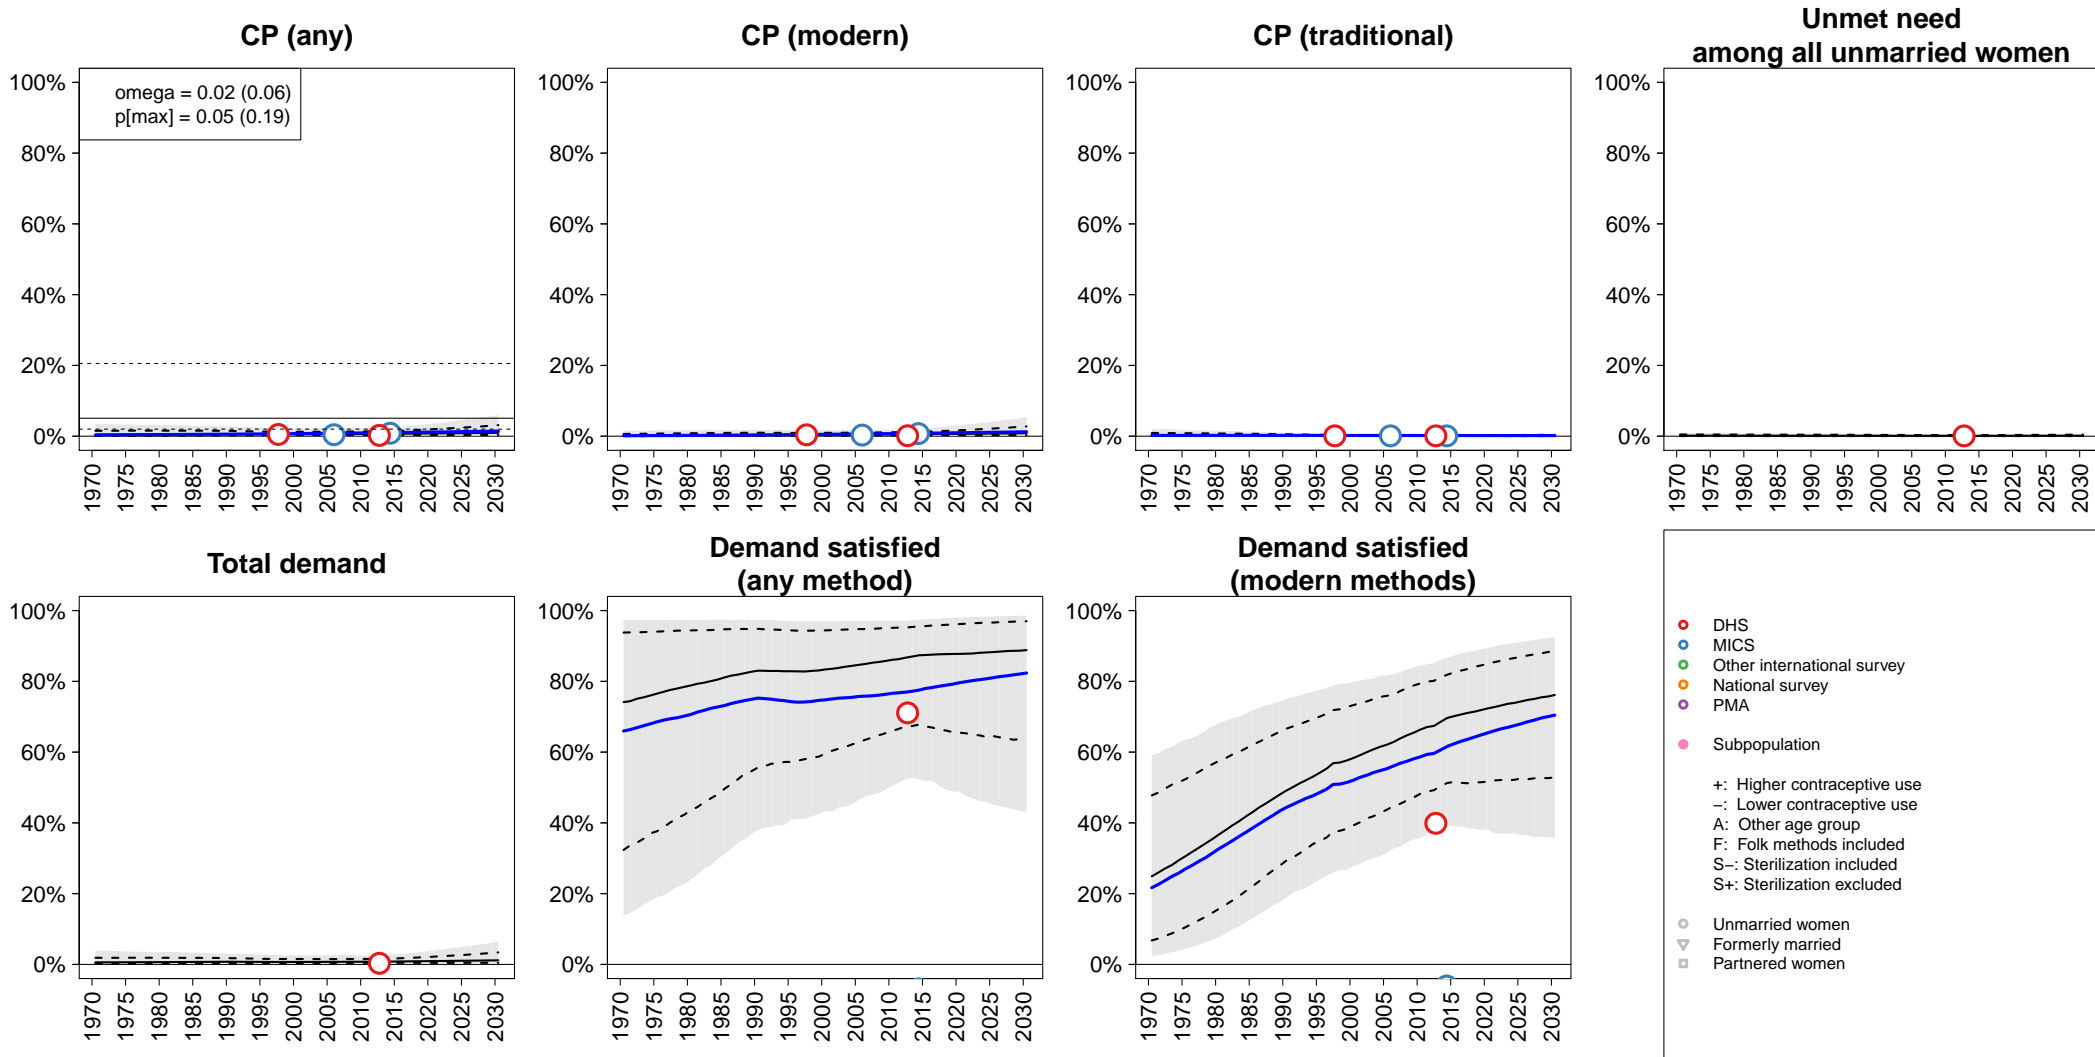

Lesotho (Southern Africa, SA Group 1) --- Unmarried / Not In-Union

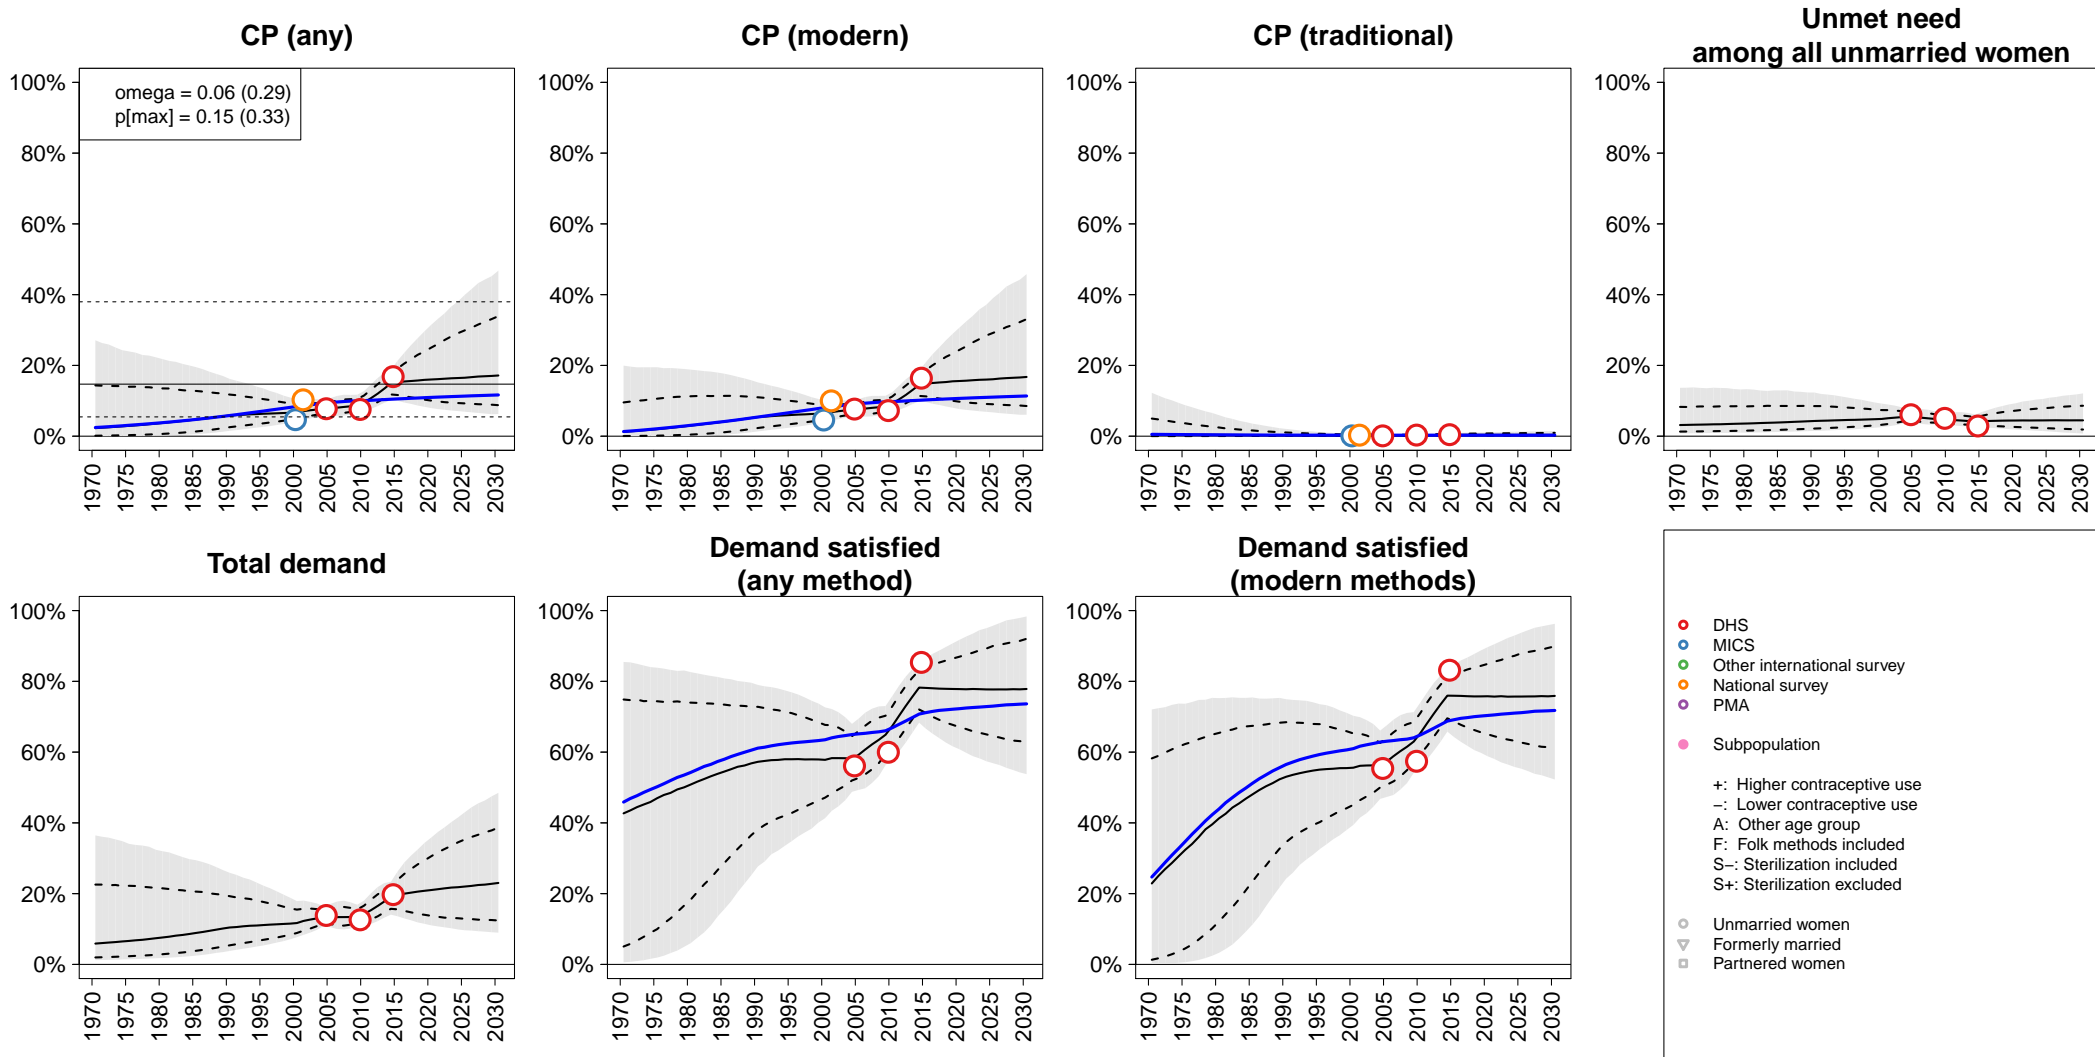

Liberia (Western Africa, SA Group 1) --- Unmarried / Not In-Union

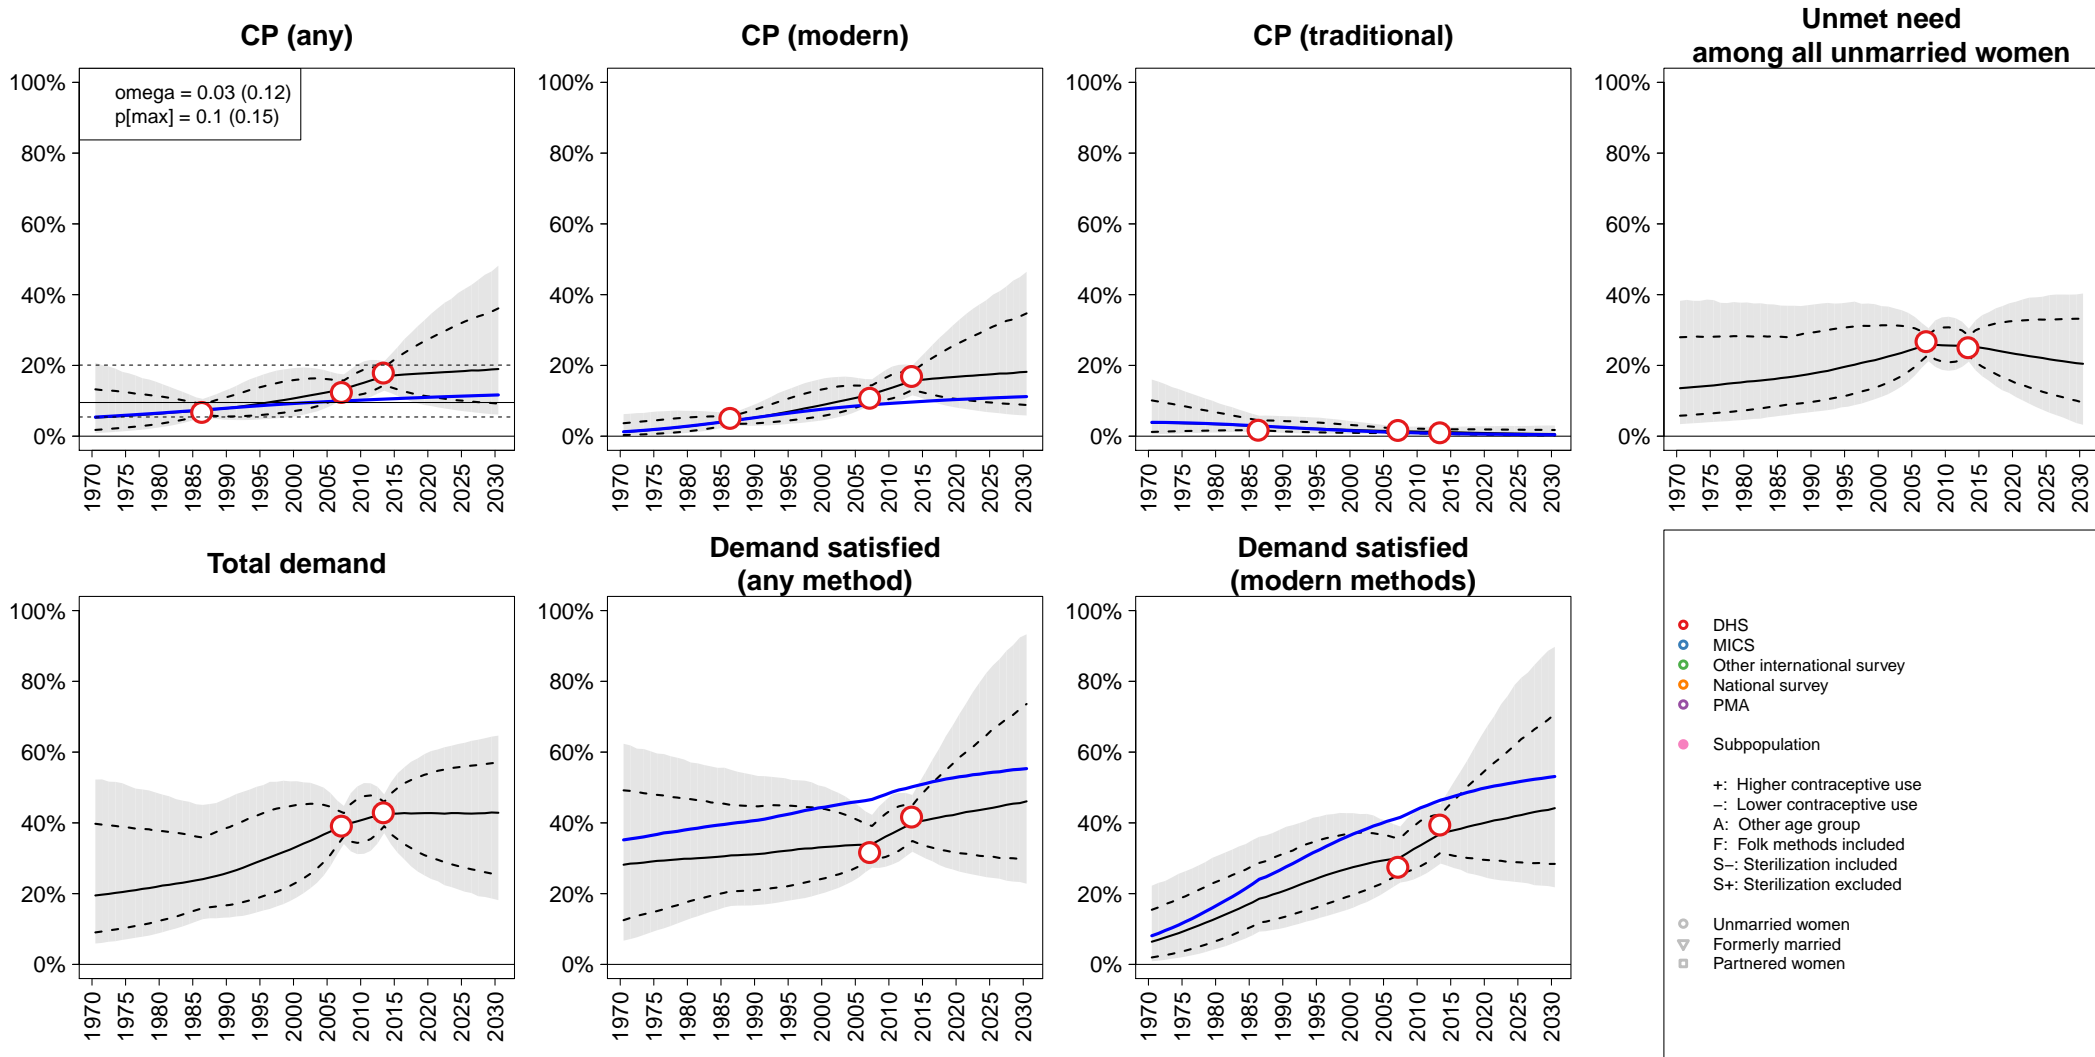

Madagascar (Eastern Africa, SA Group 1) --- Unmarried / Not In-Union

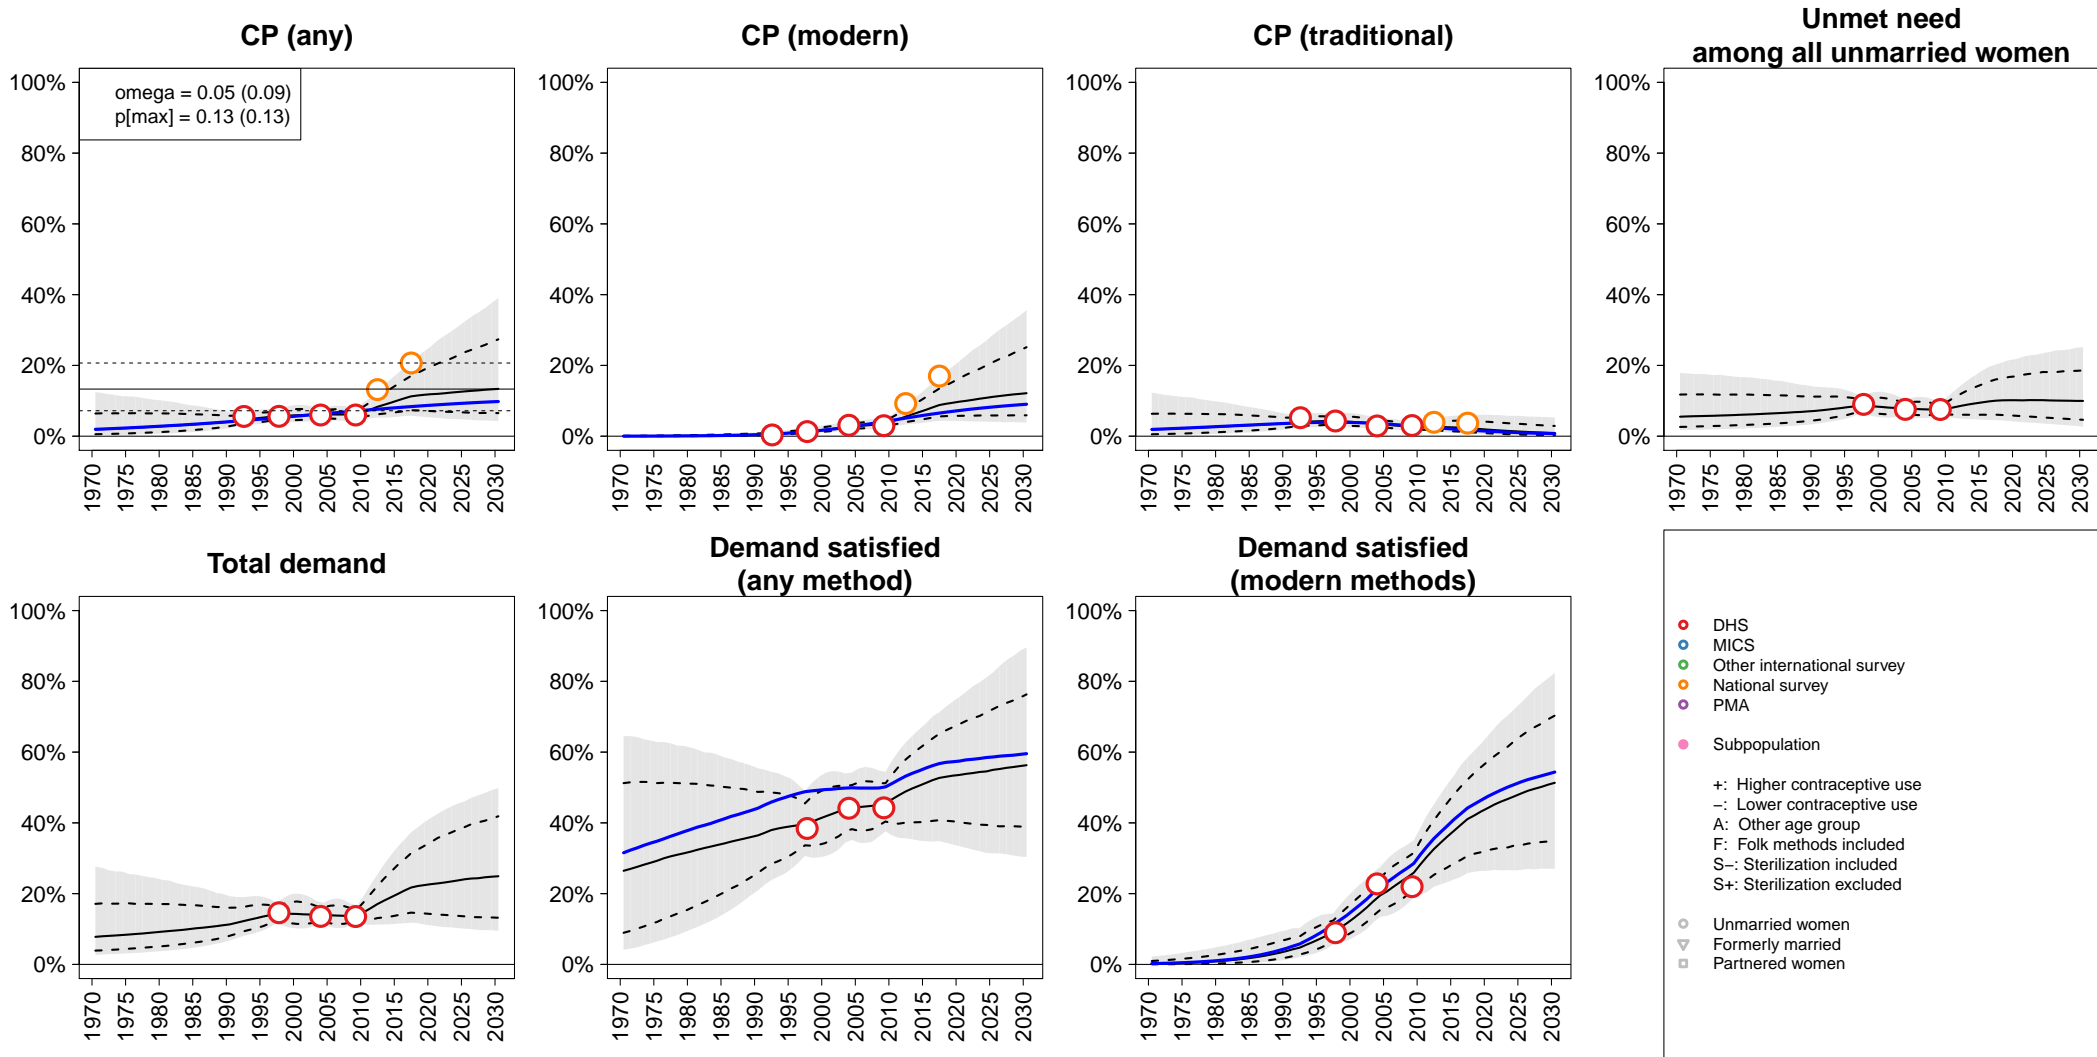

Malawi (Eastern Africa, SA Group 1) --- Unmarried / Not In-Union

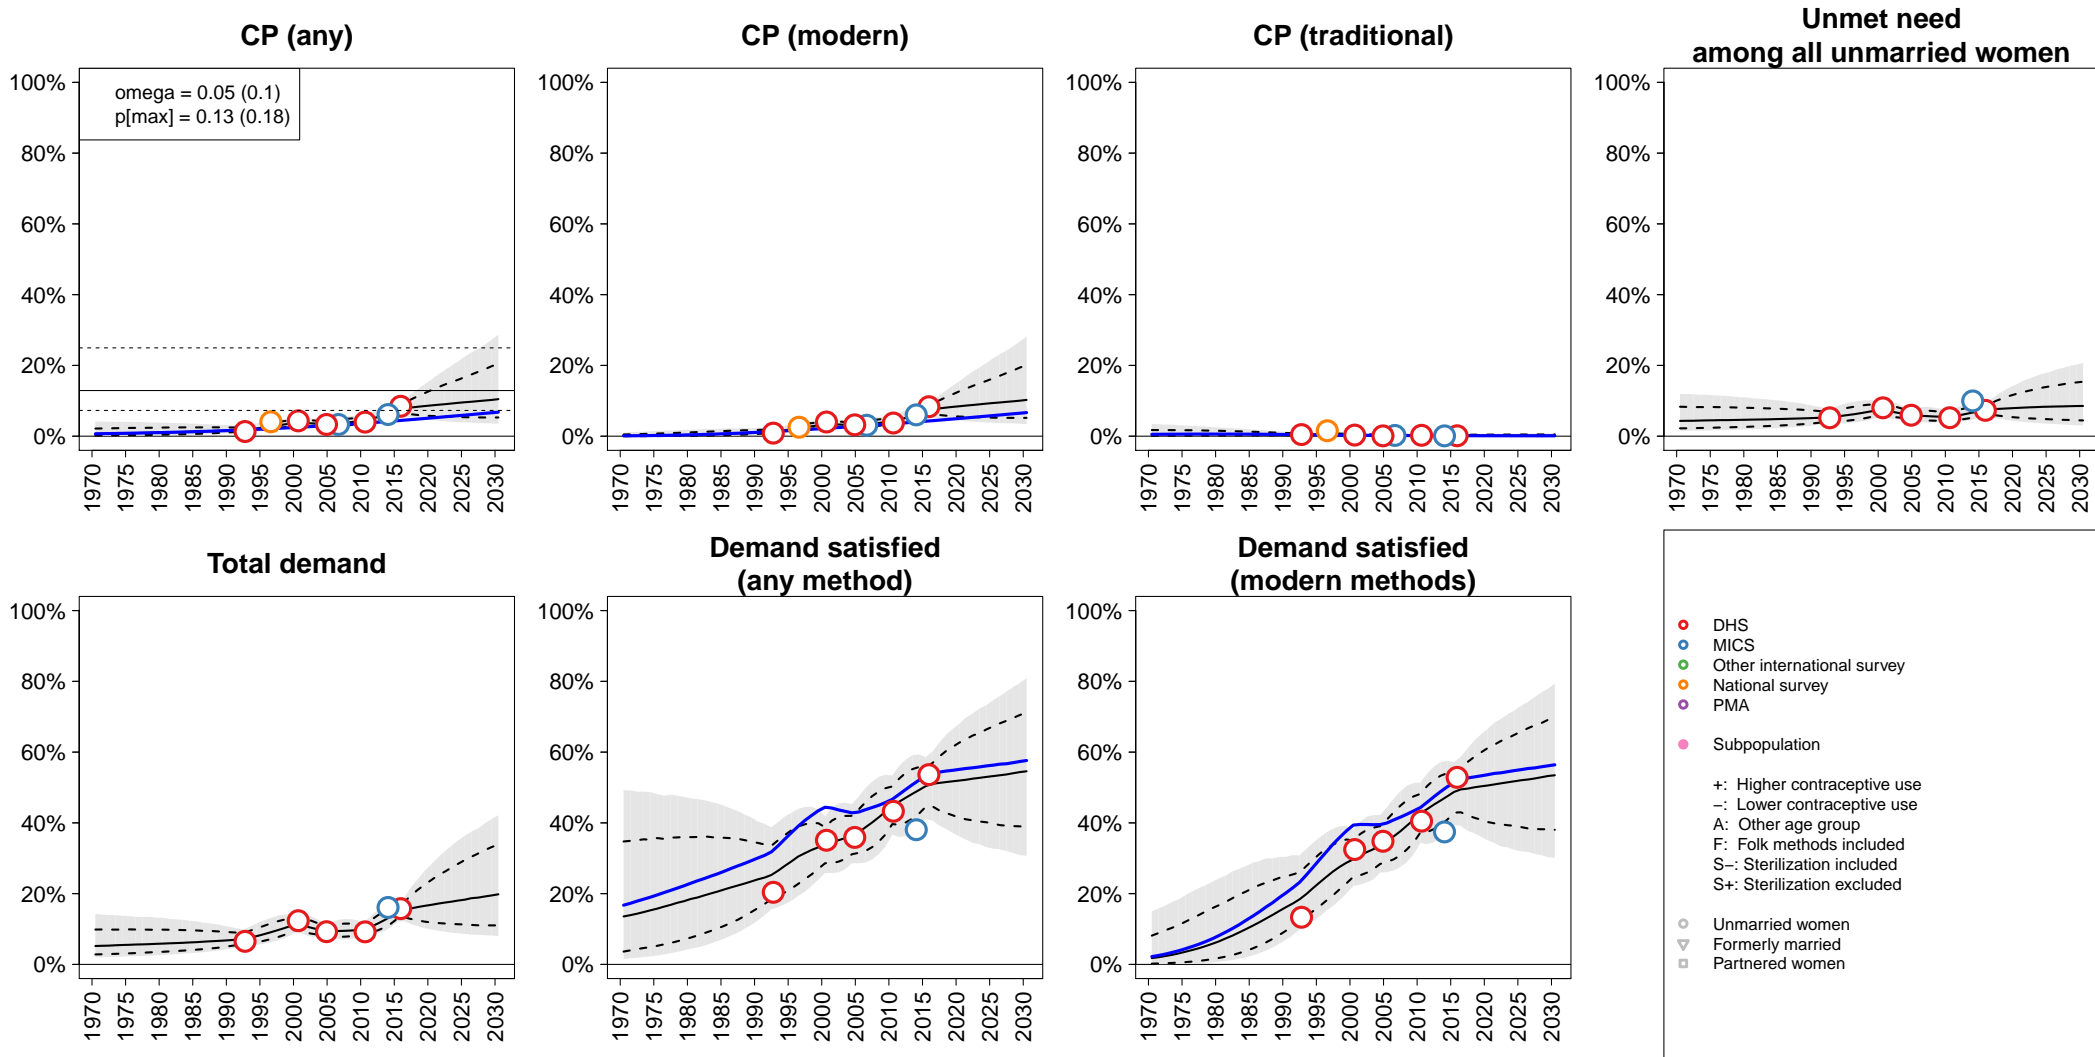



Mali (Western Africa, SA Group 1) --- Unmarried / Not In-Union

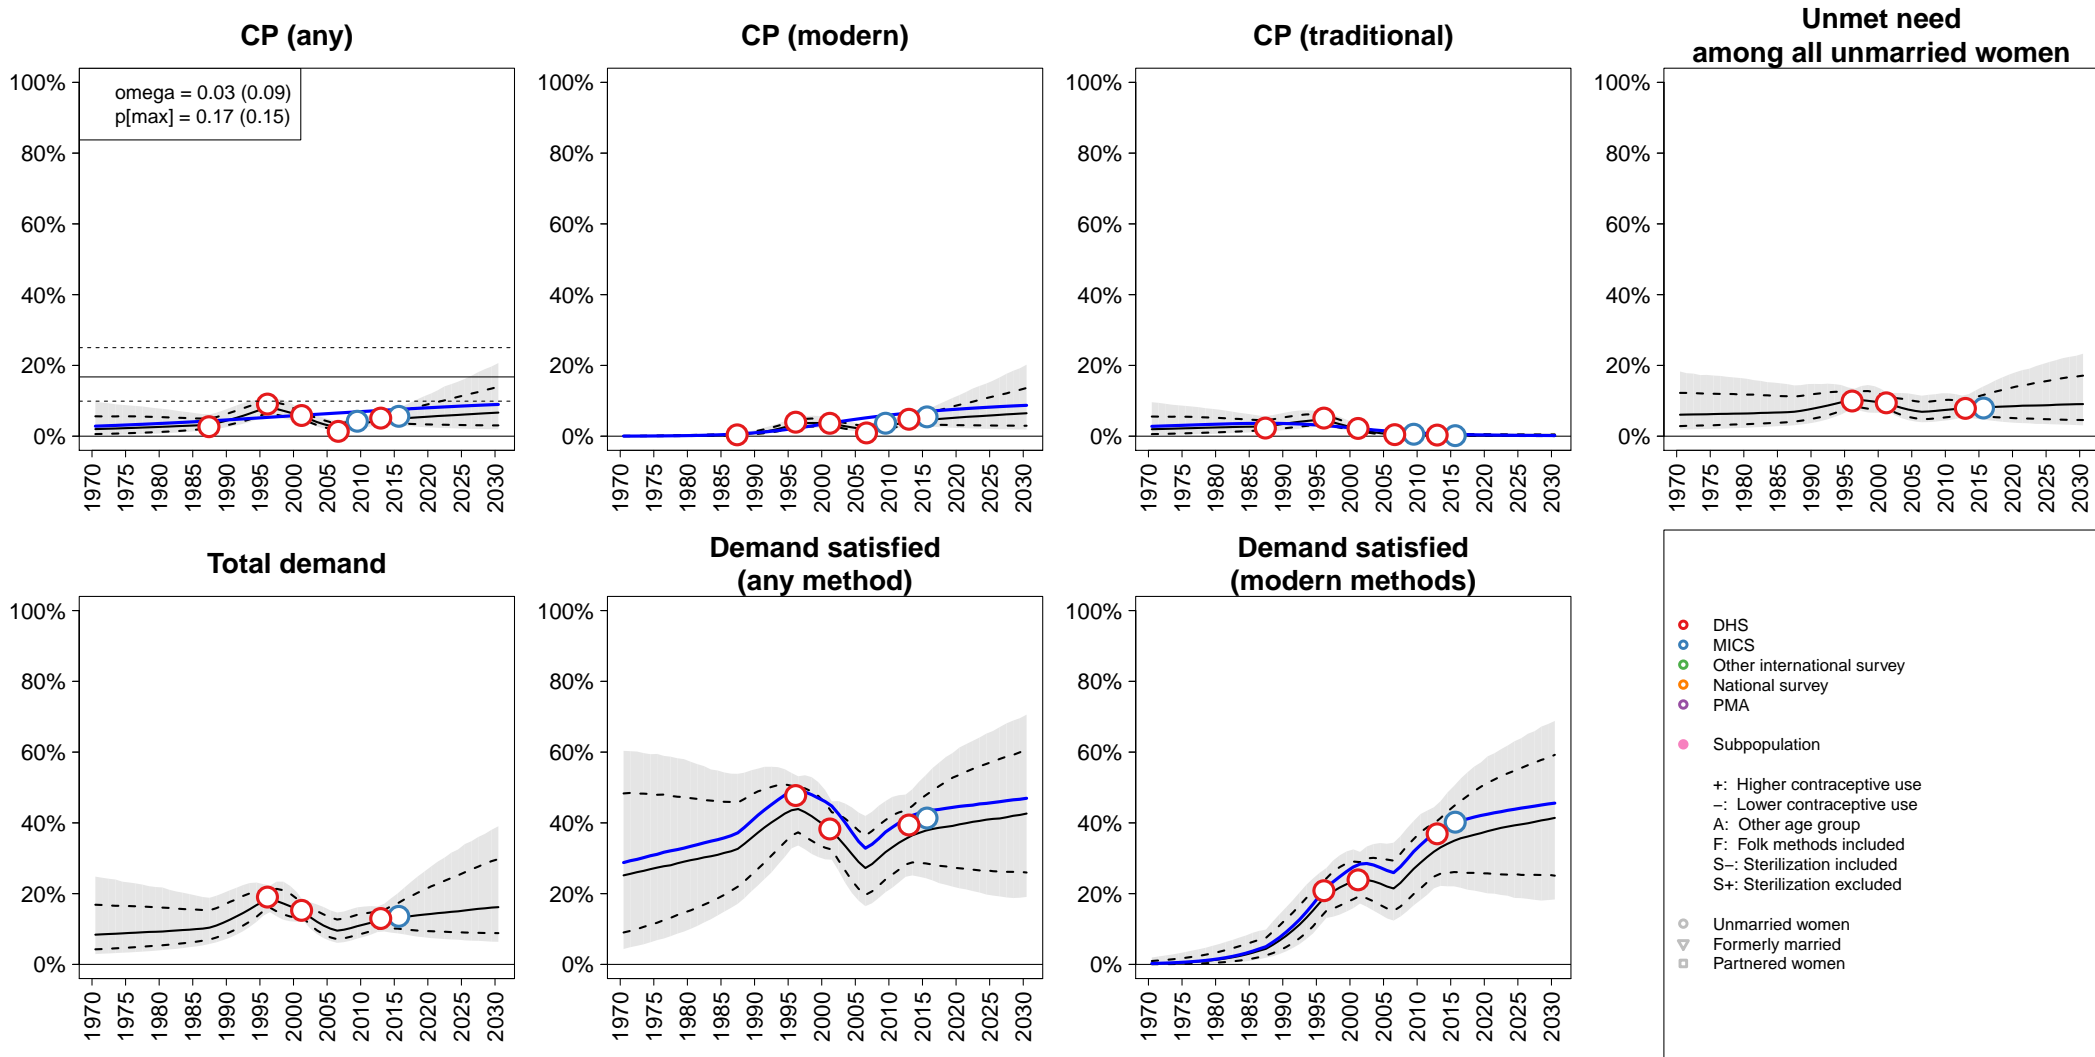

Mexico (Central America, SA Group 1) --- Unmarried / Not In-Union

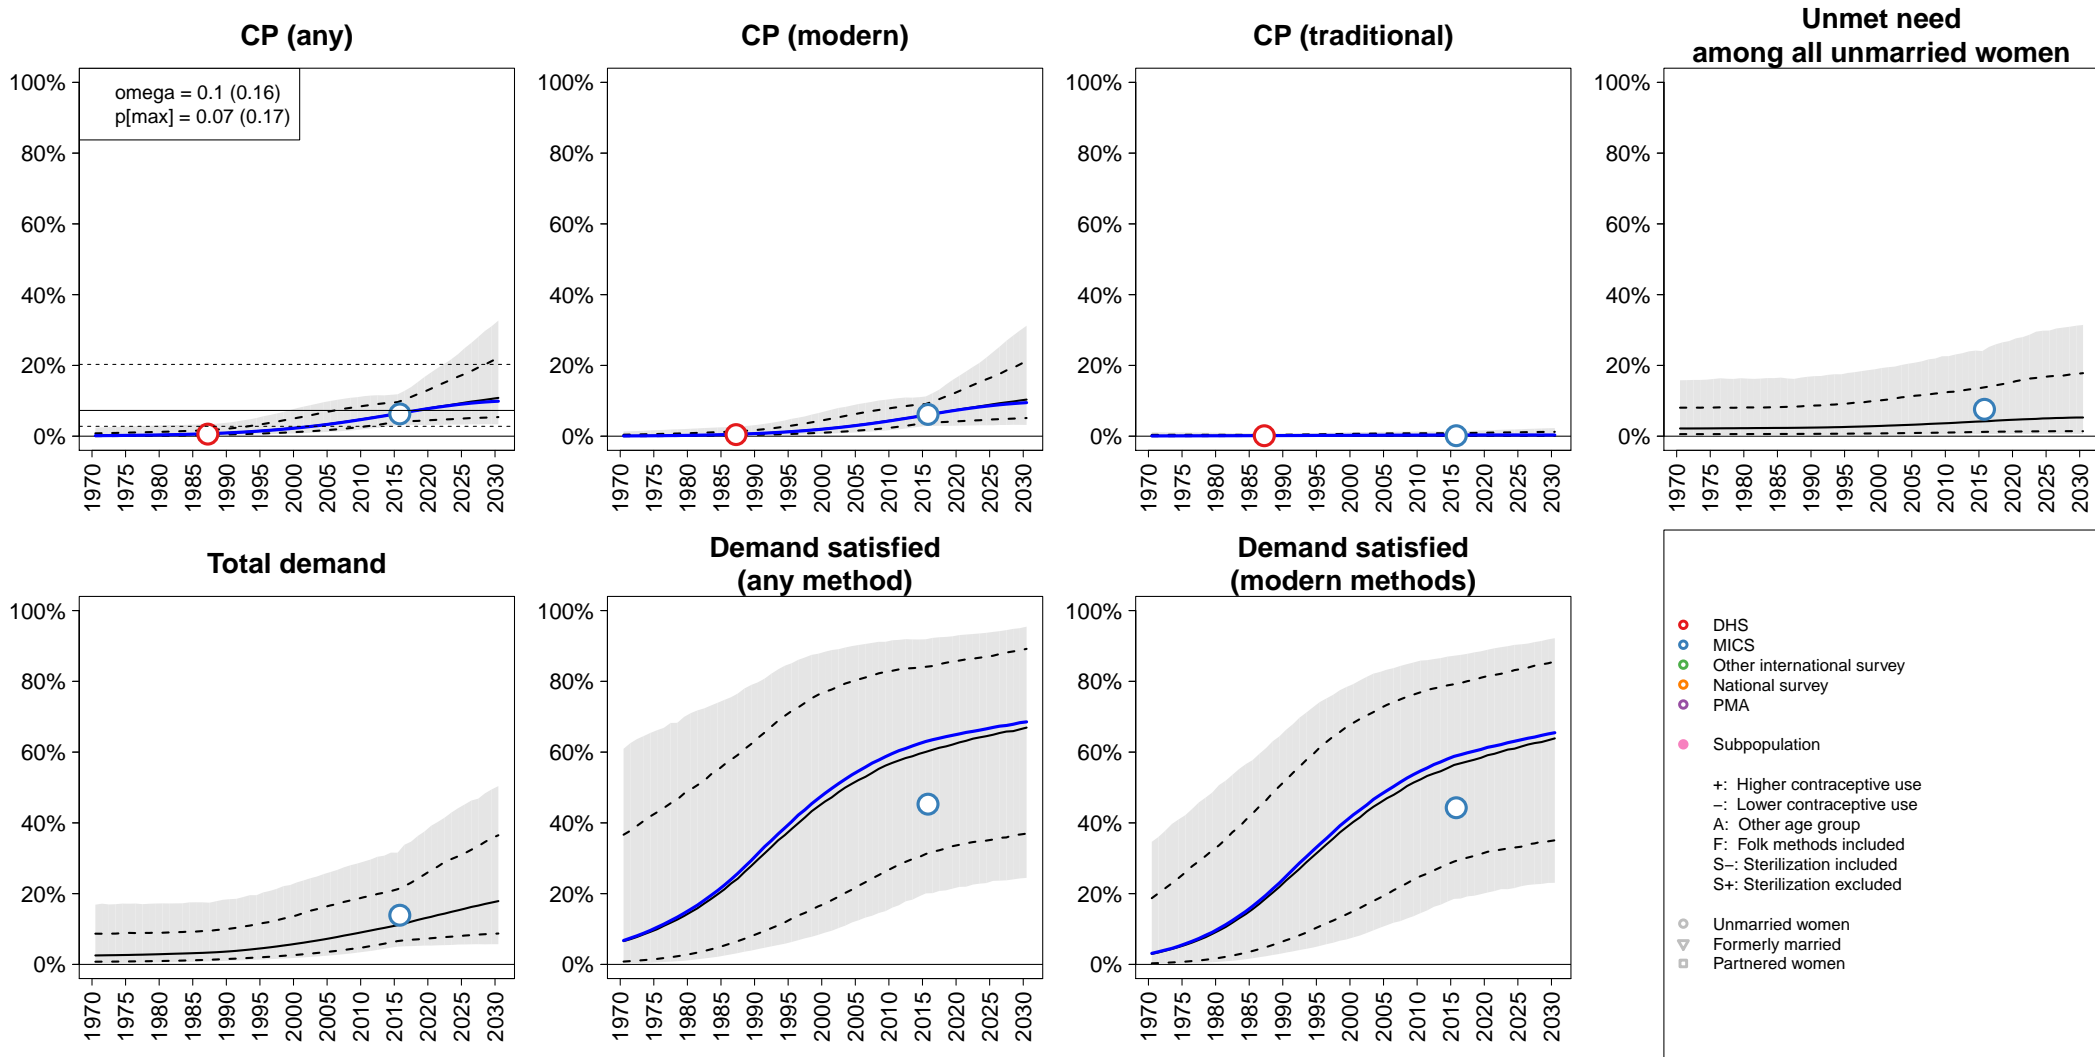

Mongolia (Eastern Asia, SA Group 1) --- Unmarried / Not In-Union

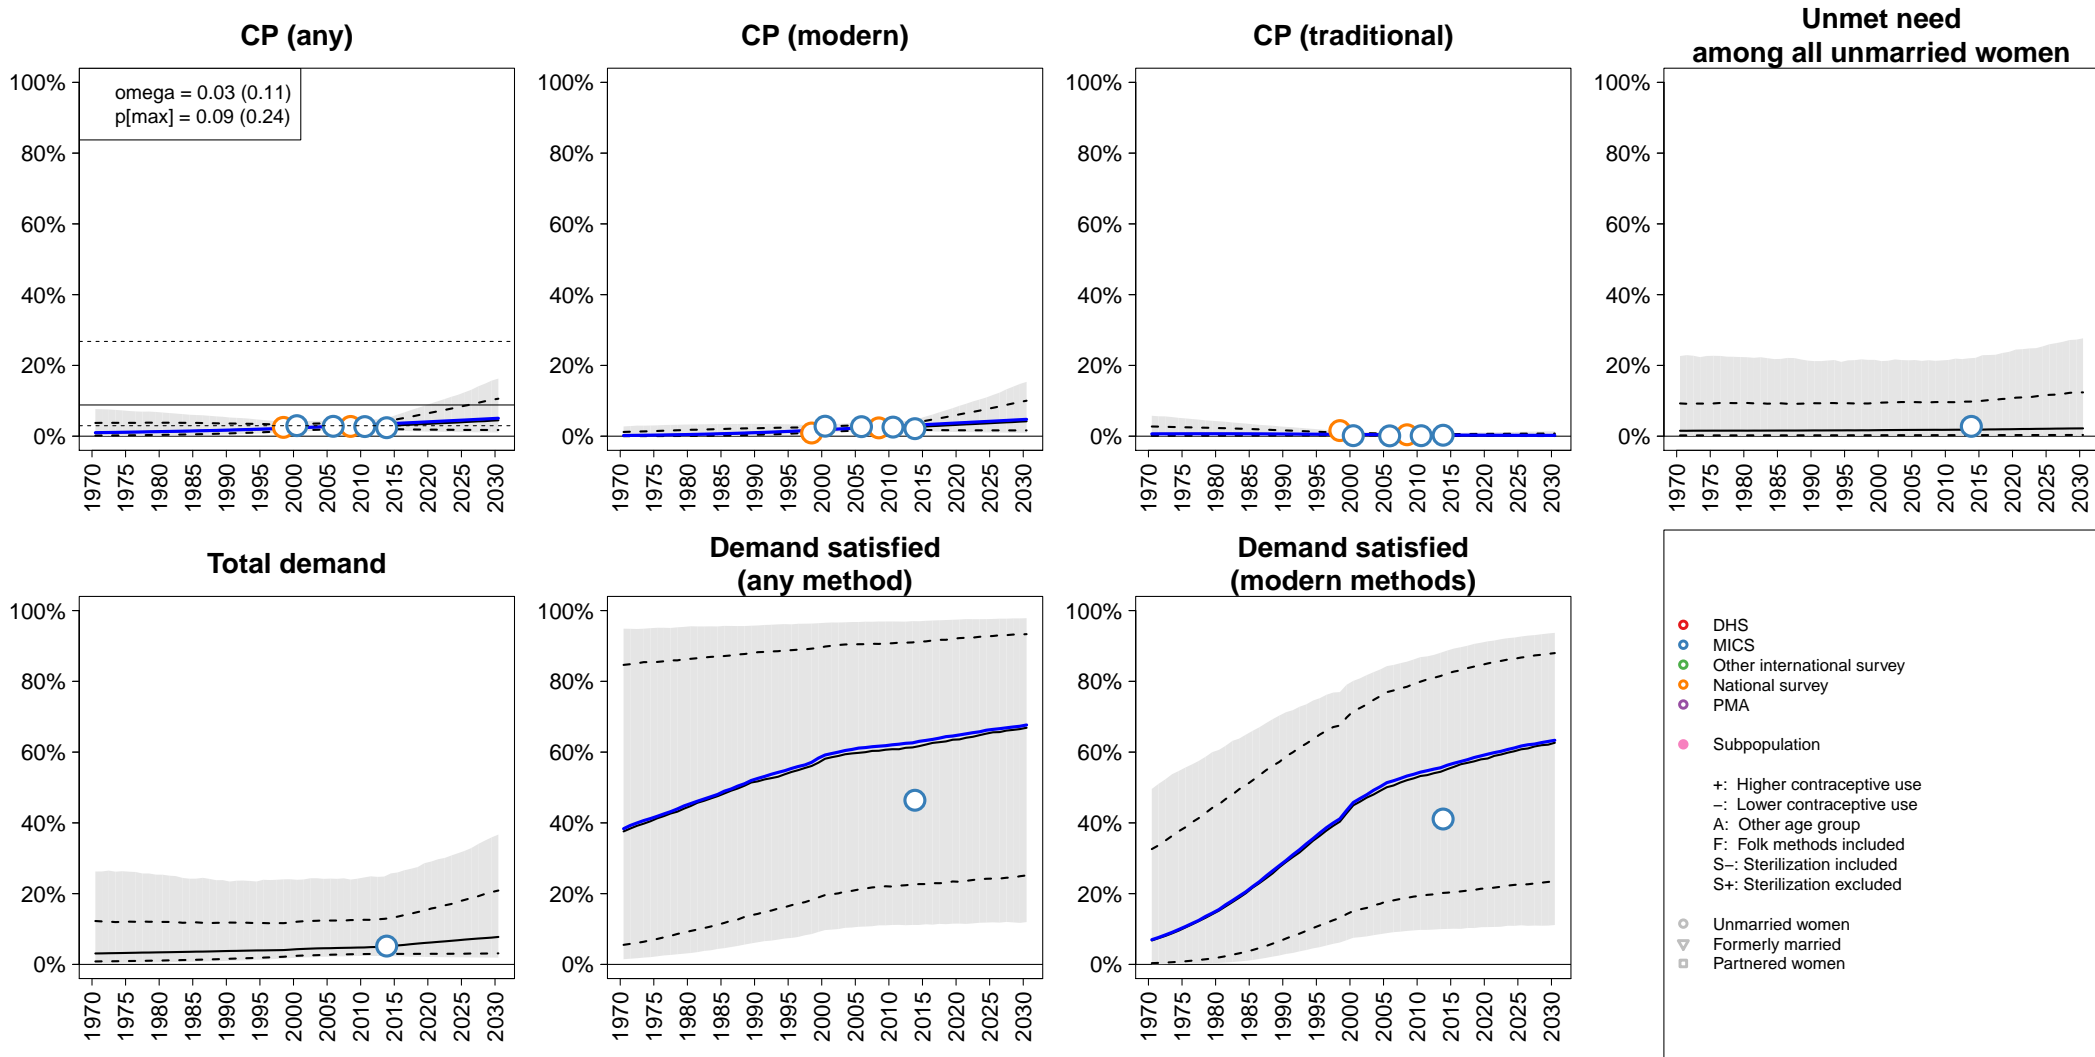

Montenegro (Southern Europe, SA Group 1) --- Unmarried / Not In-Union

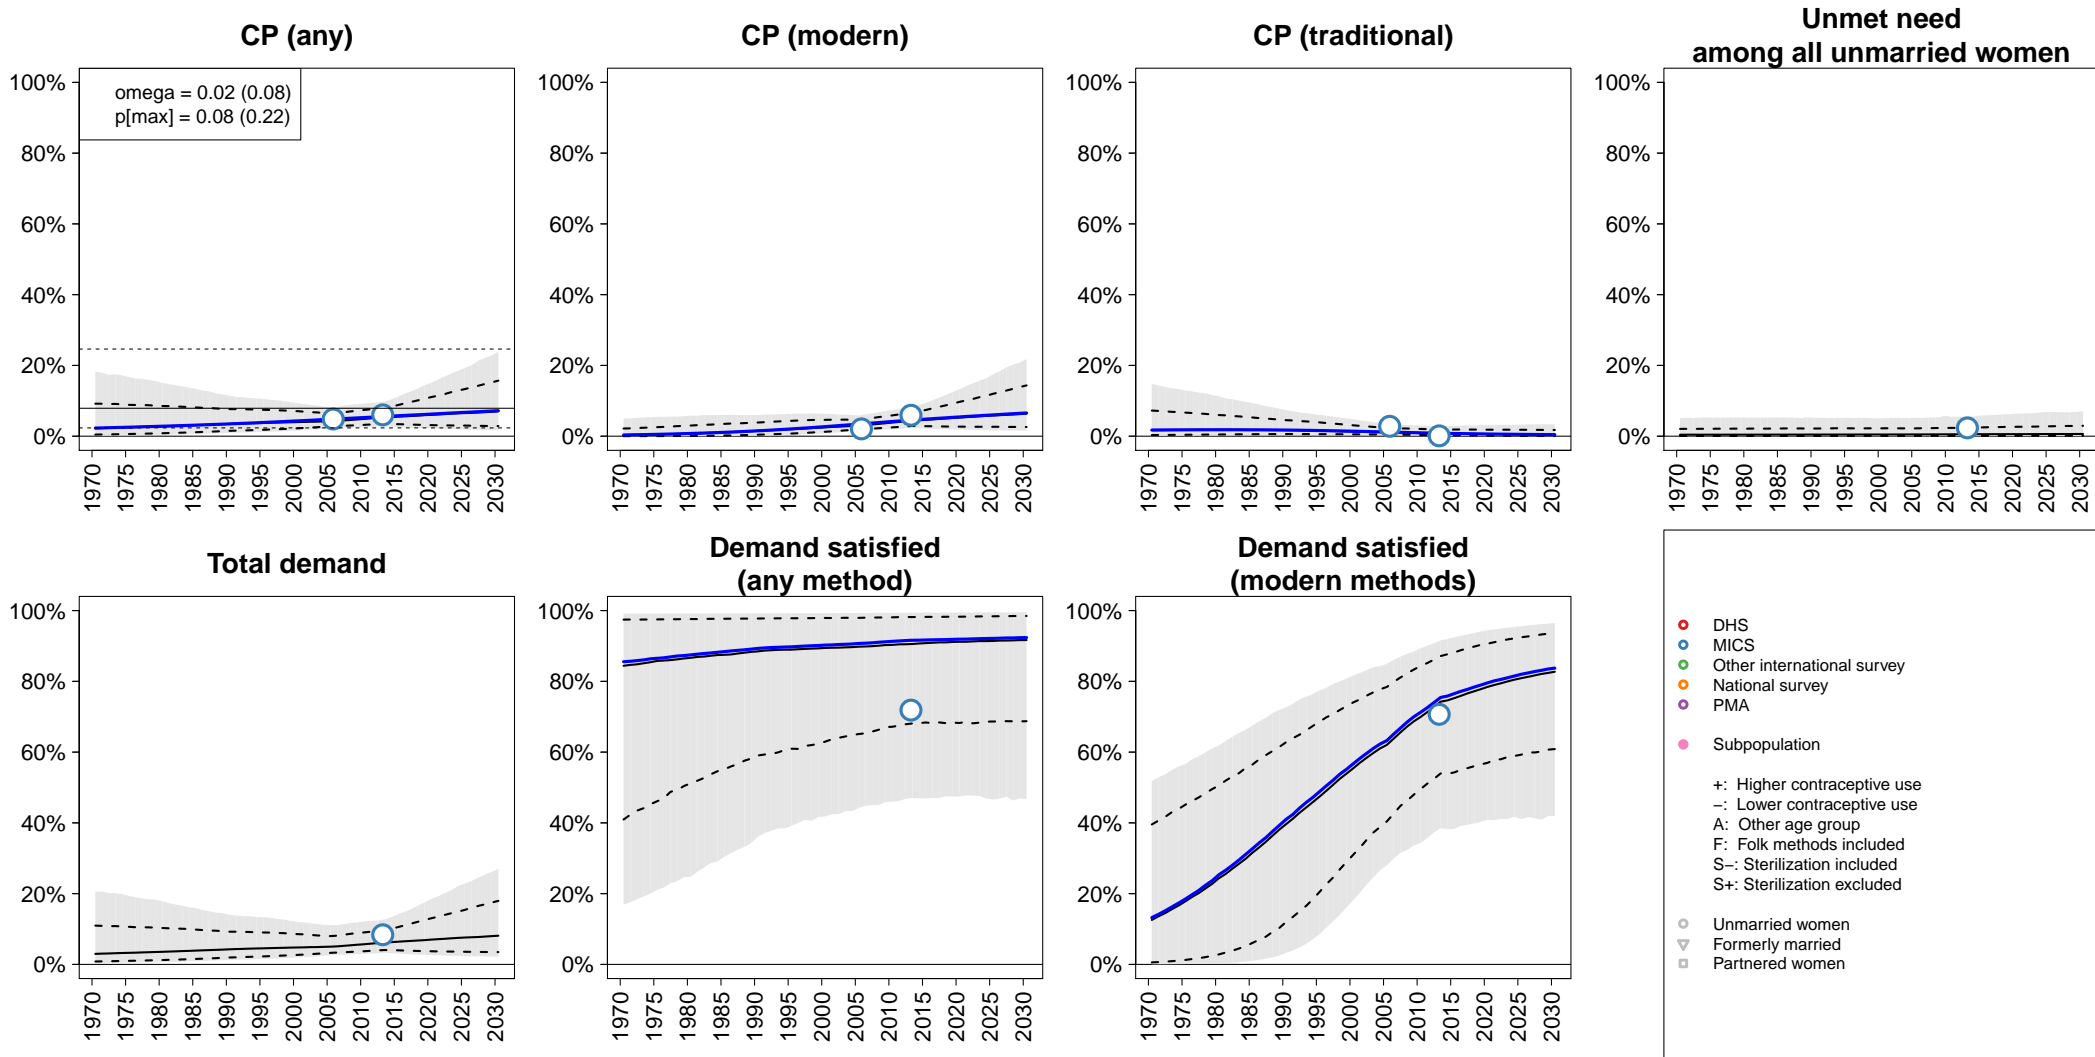

Mozambique (Eastern Africa, SA Group 1) --- Unmarried / Not In-Union

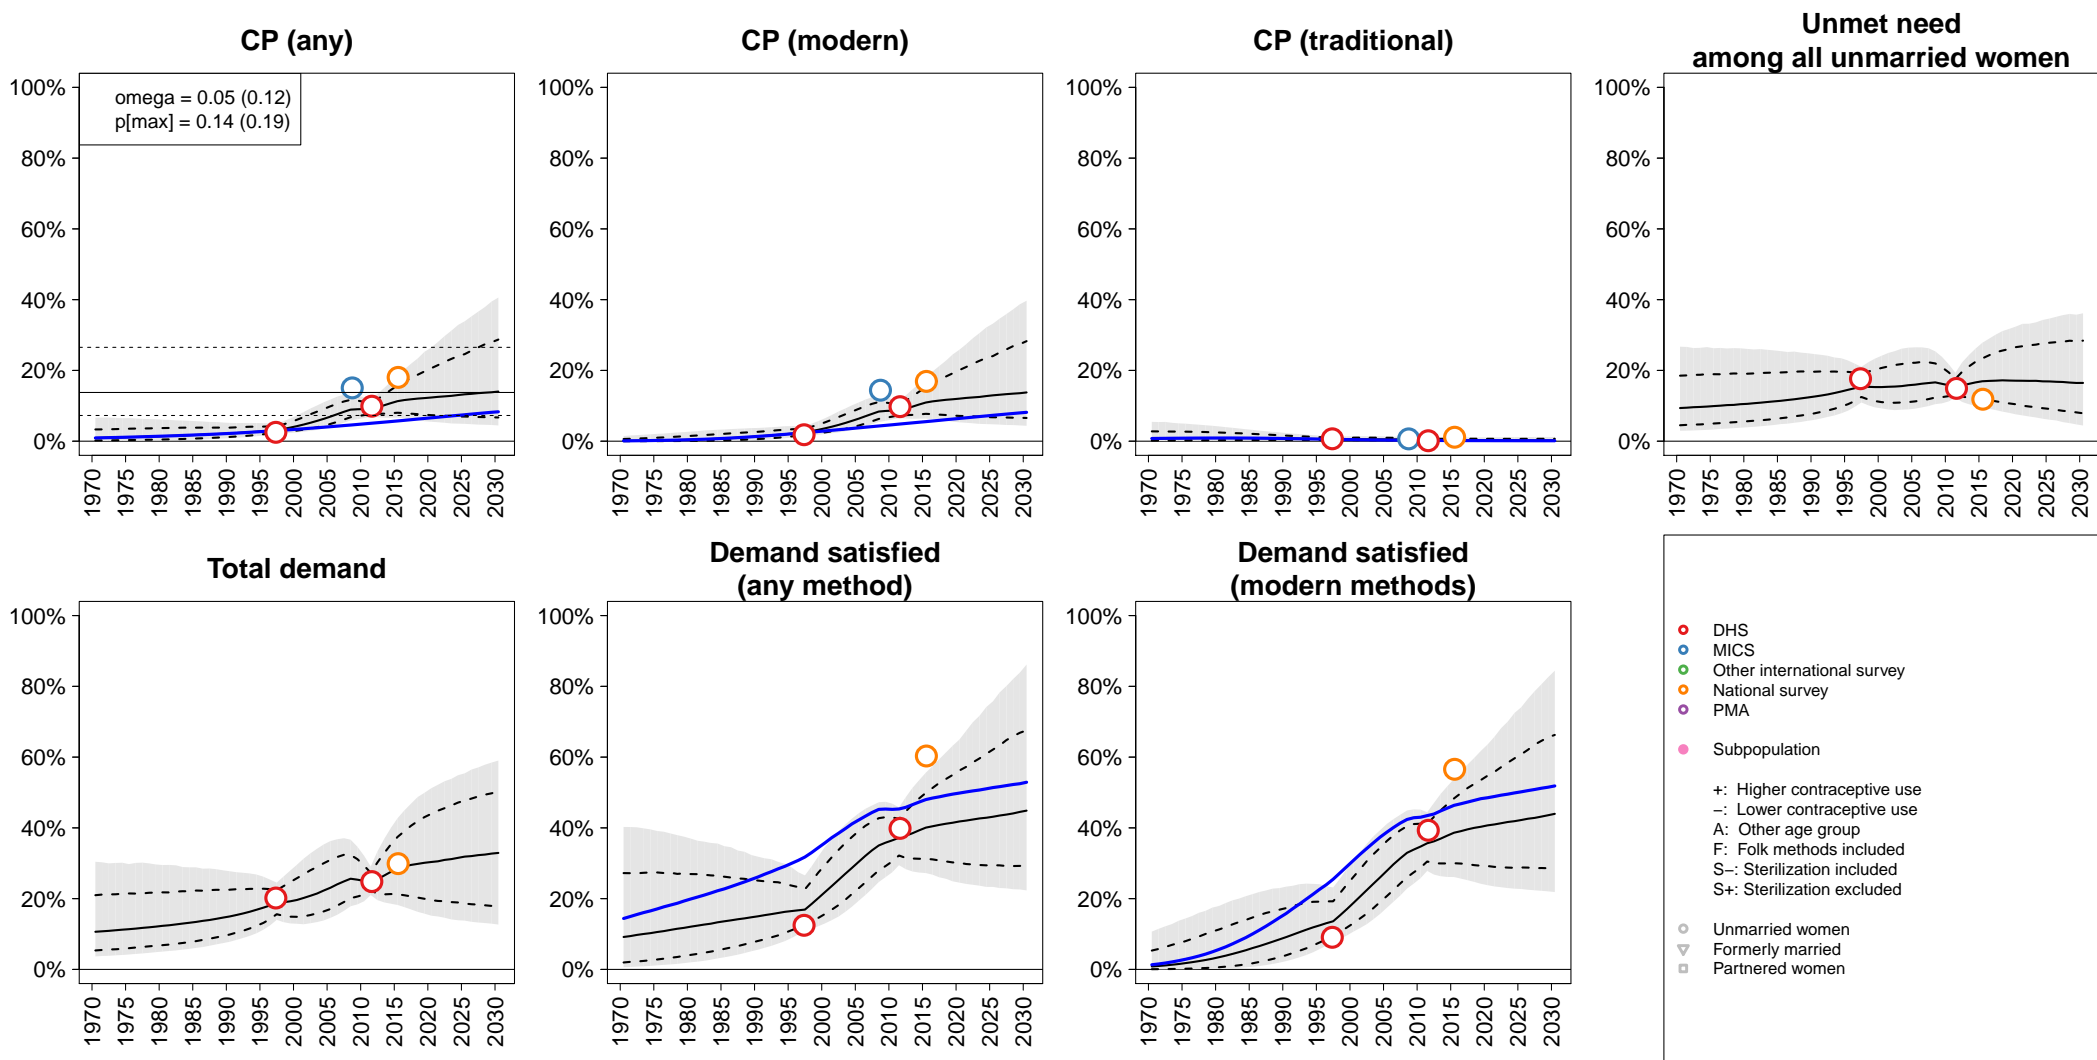

Namibia (Southern Africa, SA Group 1) --- Unmarried / Not In-Union

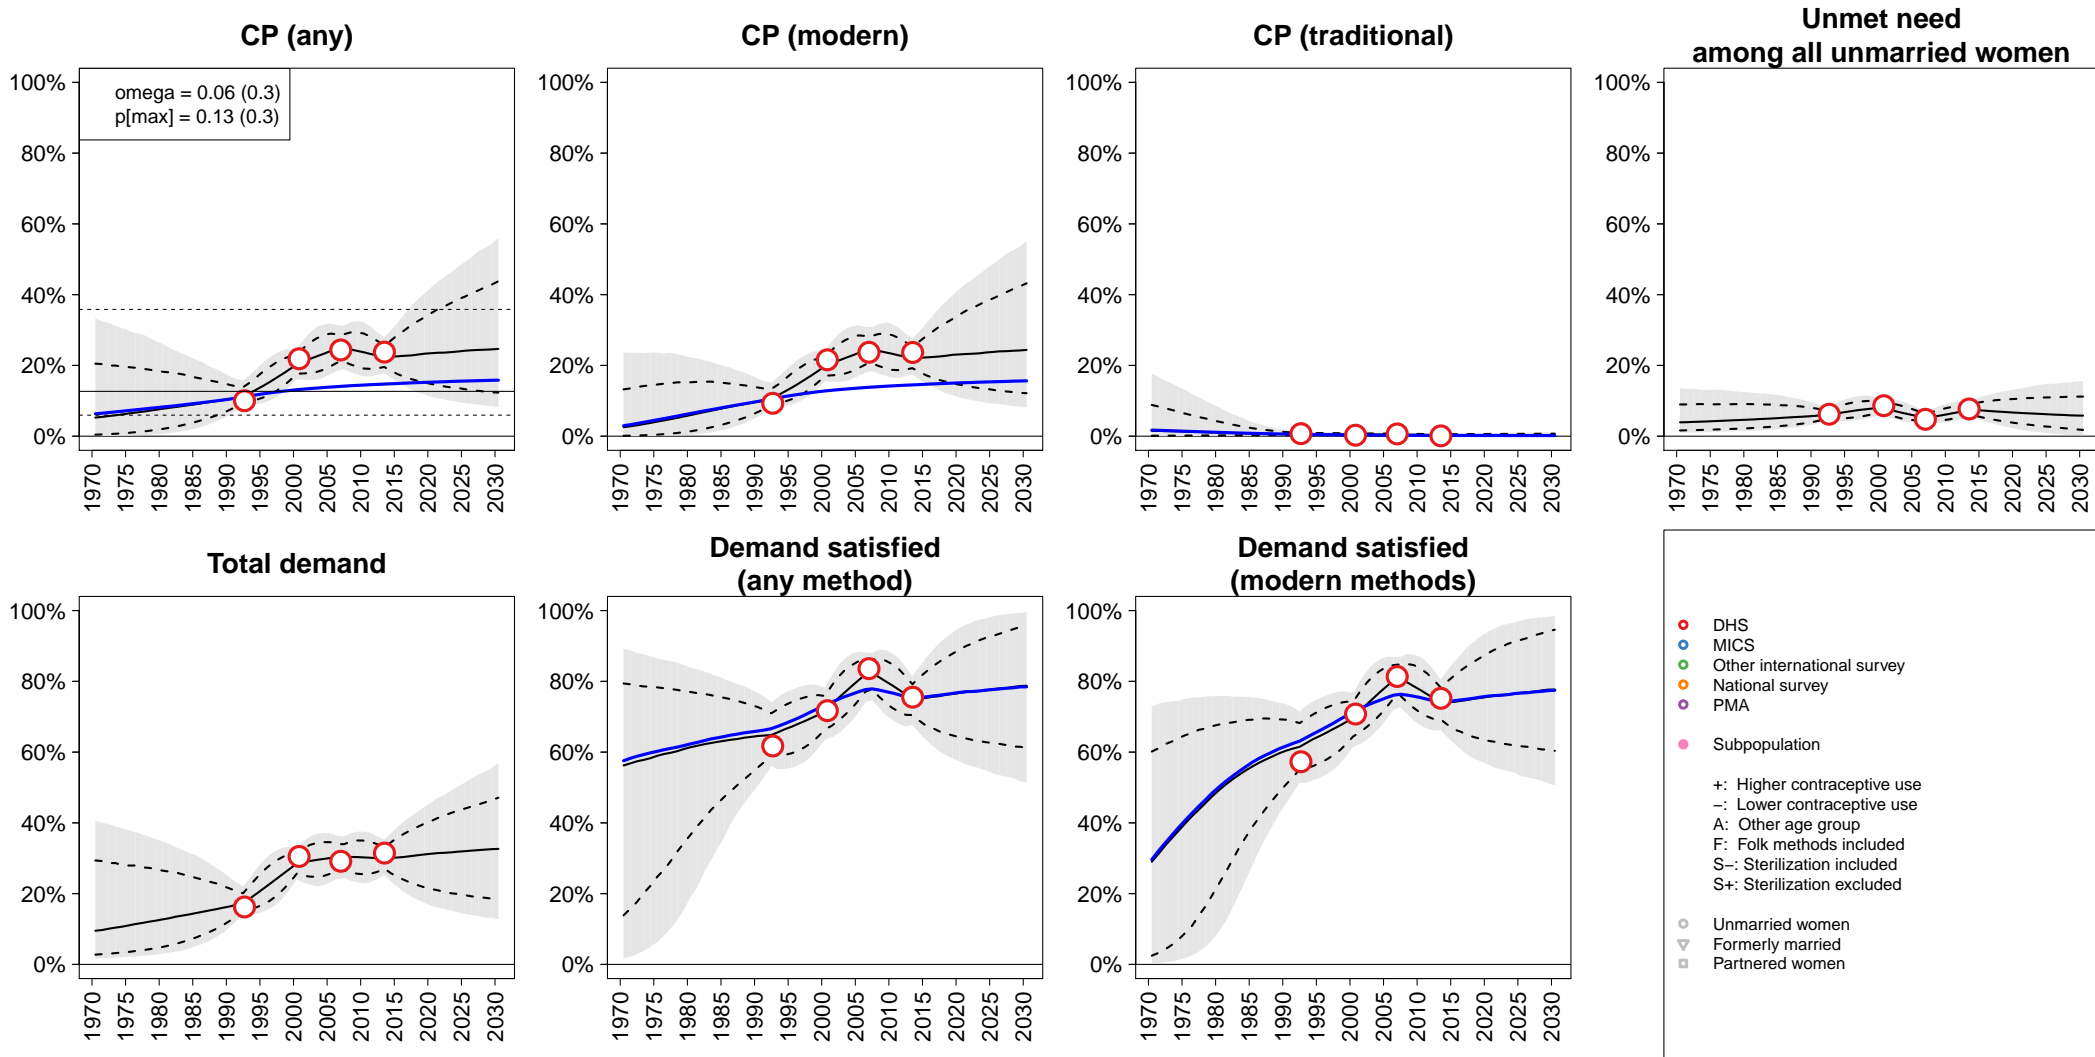

Nepal (Southern Asia, SA Group 0) --- Unmarried / Not In-Union

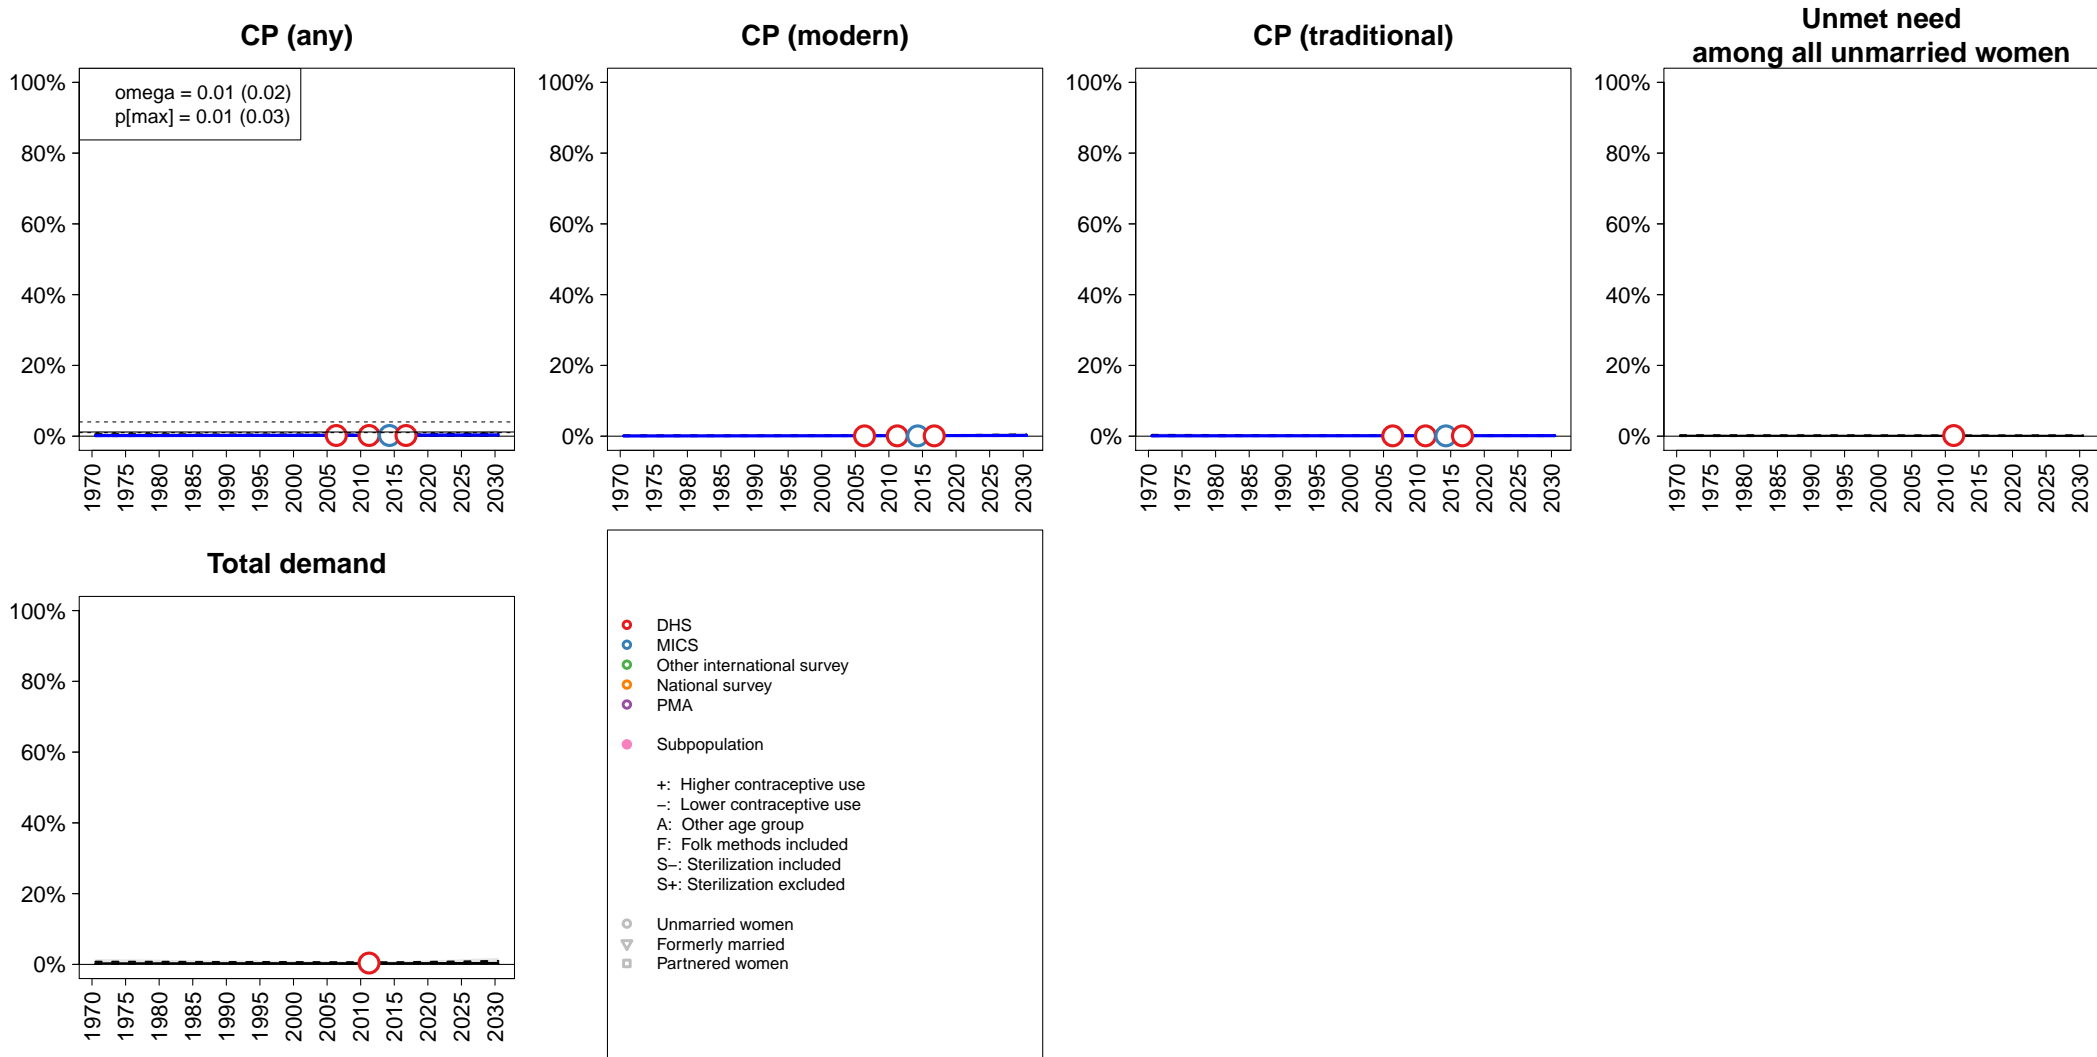

Nicaragua (Central America, SA Group 1) --- Unmarried / Not In-Union

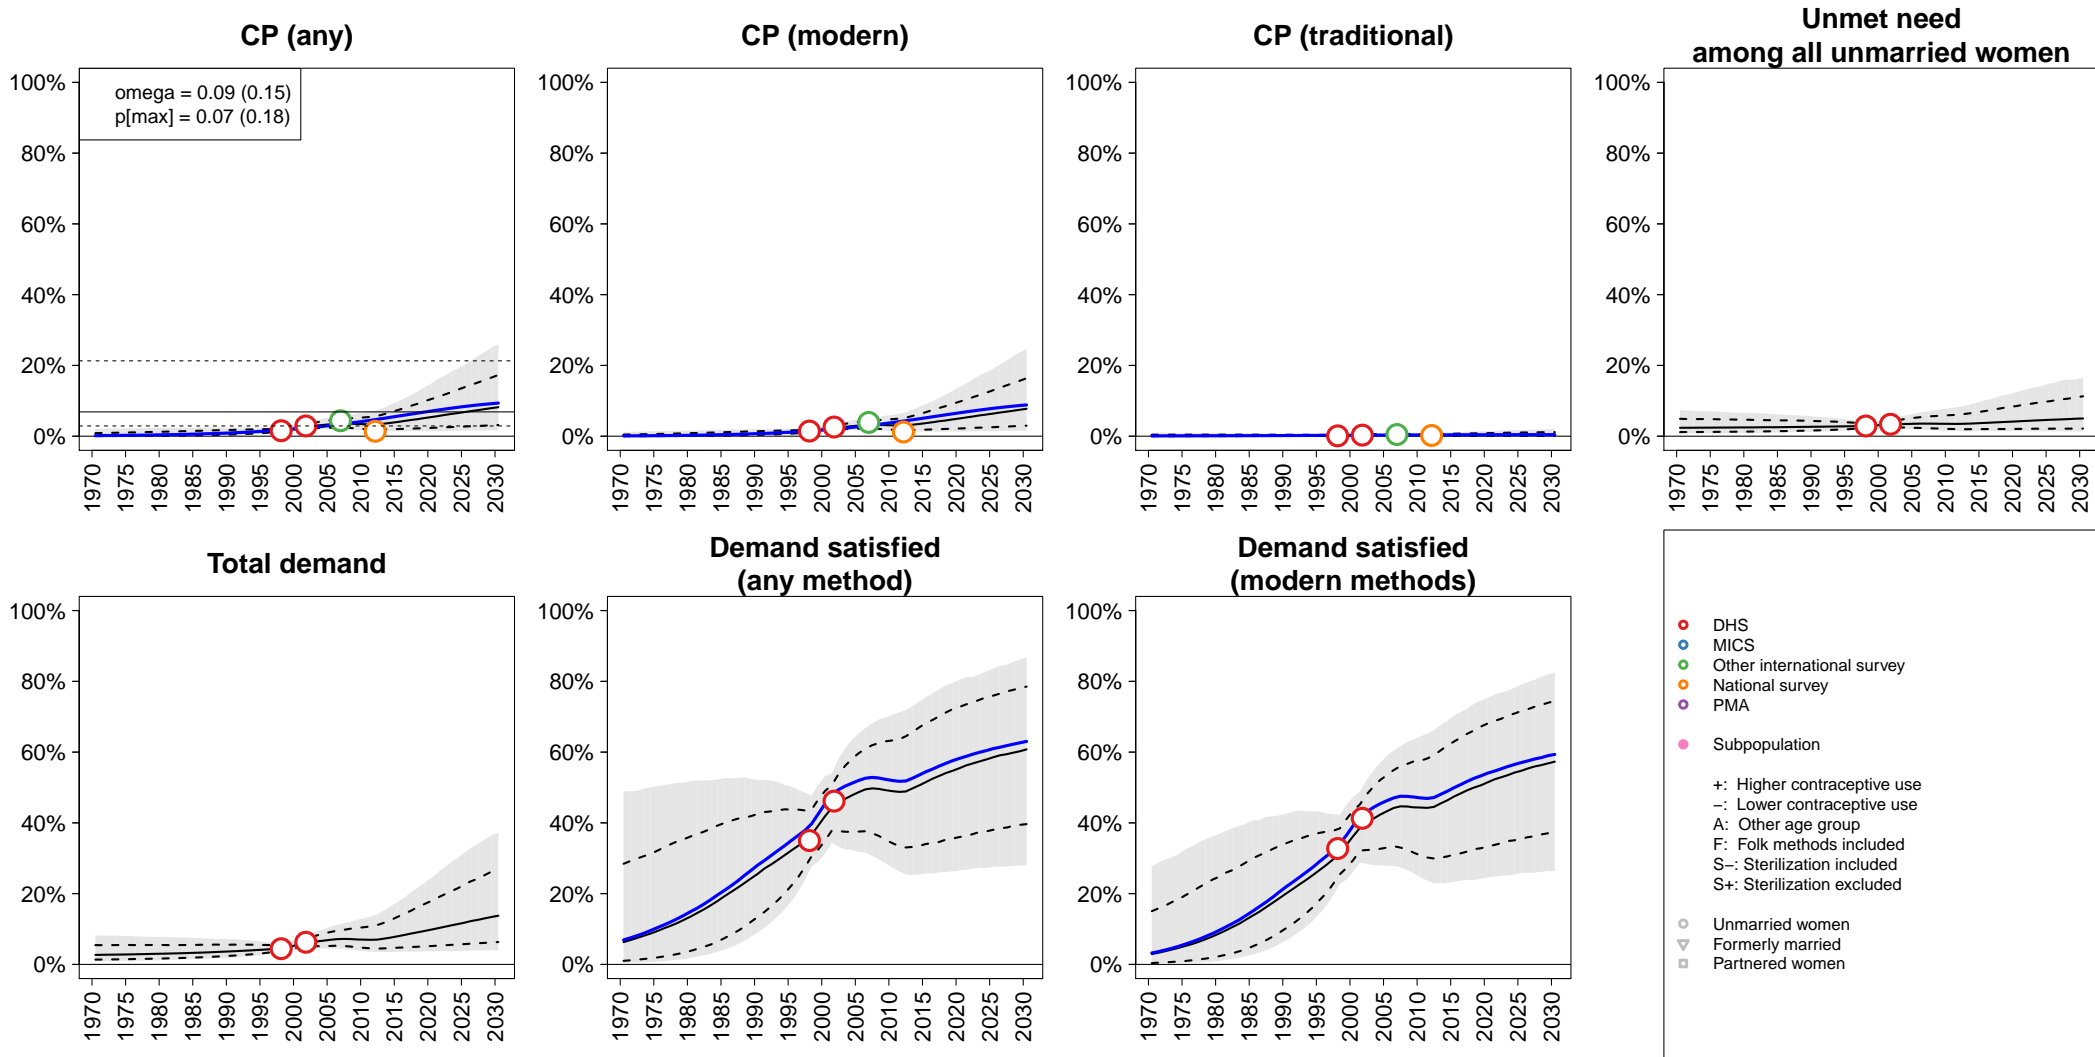



Niger (Western Africa, SA Group 0) --- Unmarried / Not In-Union

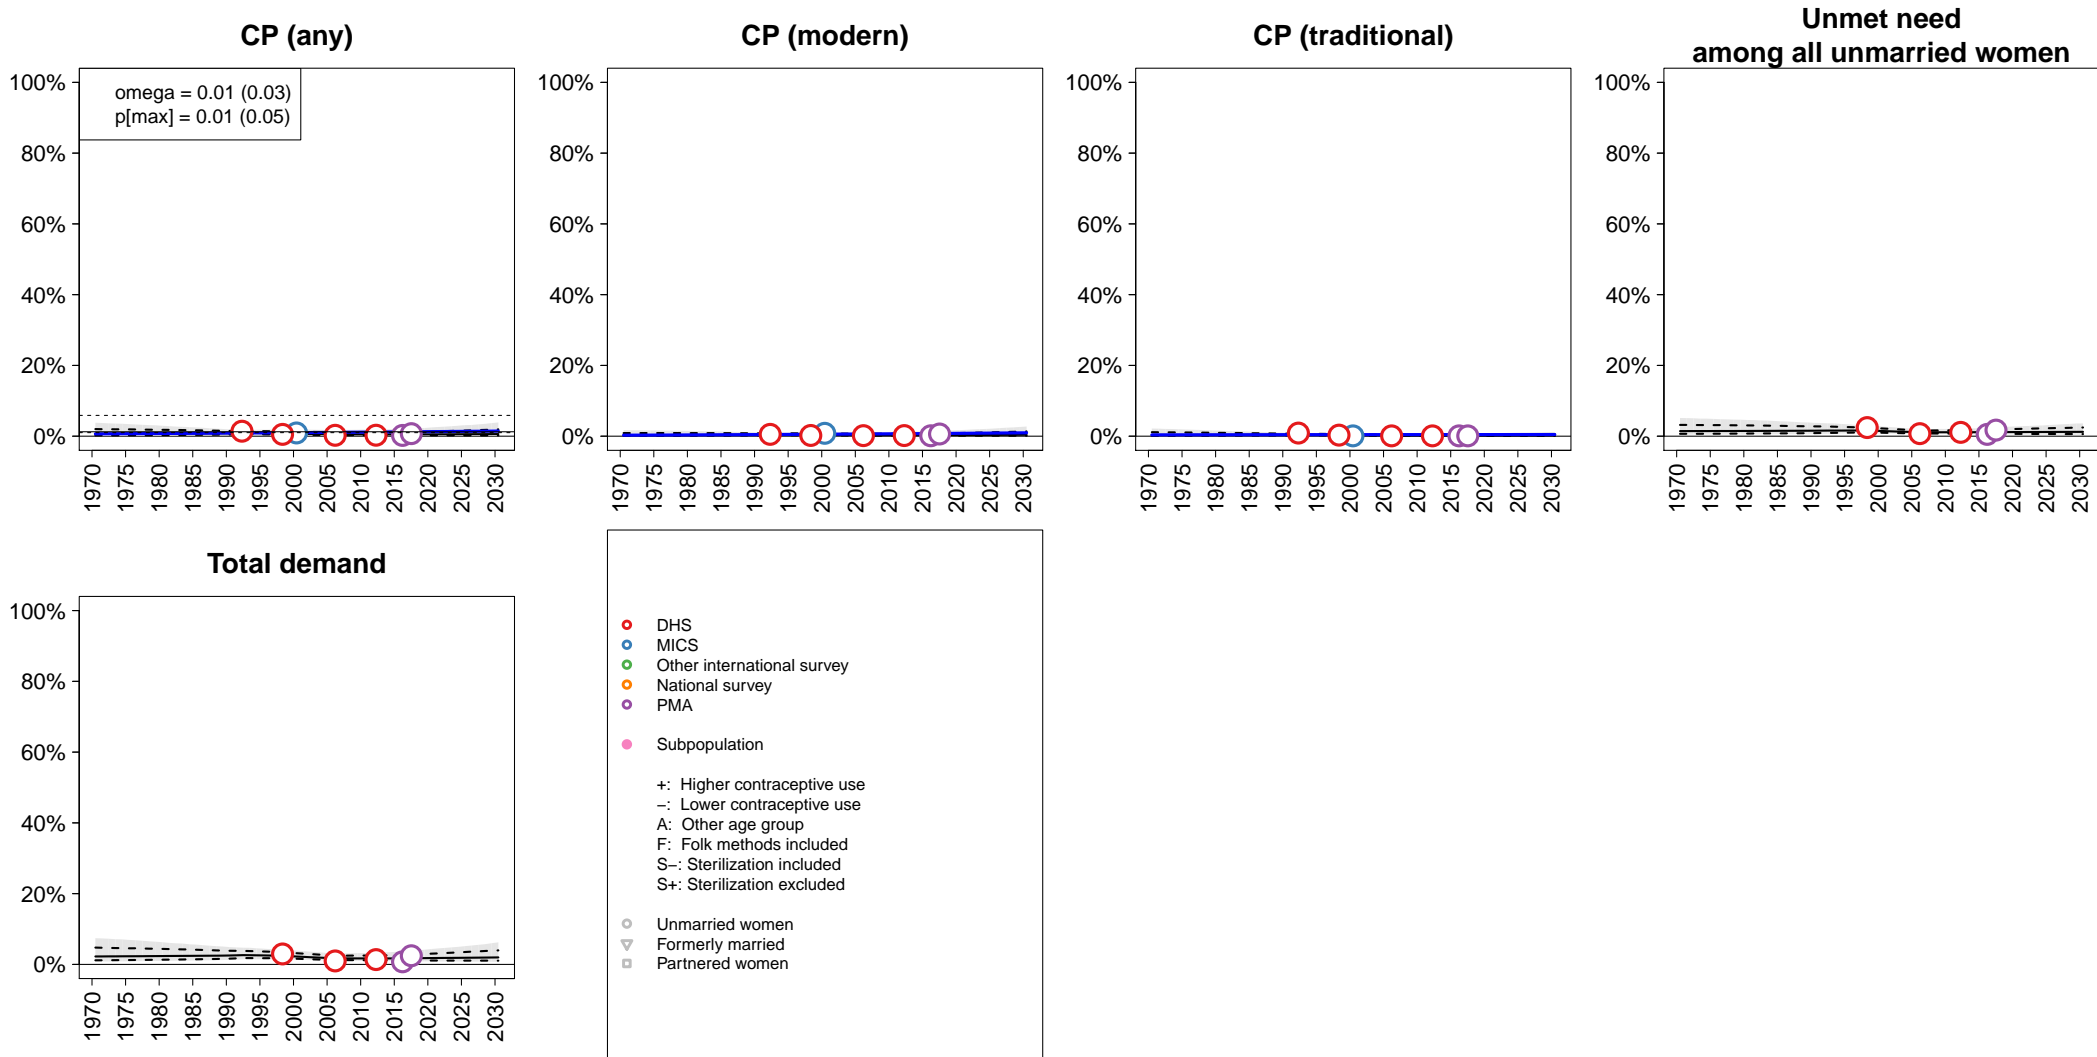

Nigeria (Western Africa, SA Group 1) --- Unmarried / Not In-Union

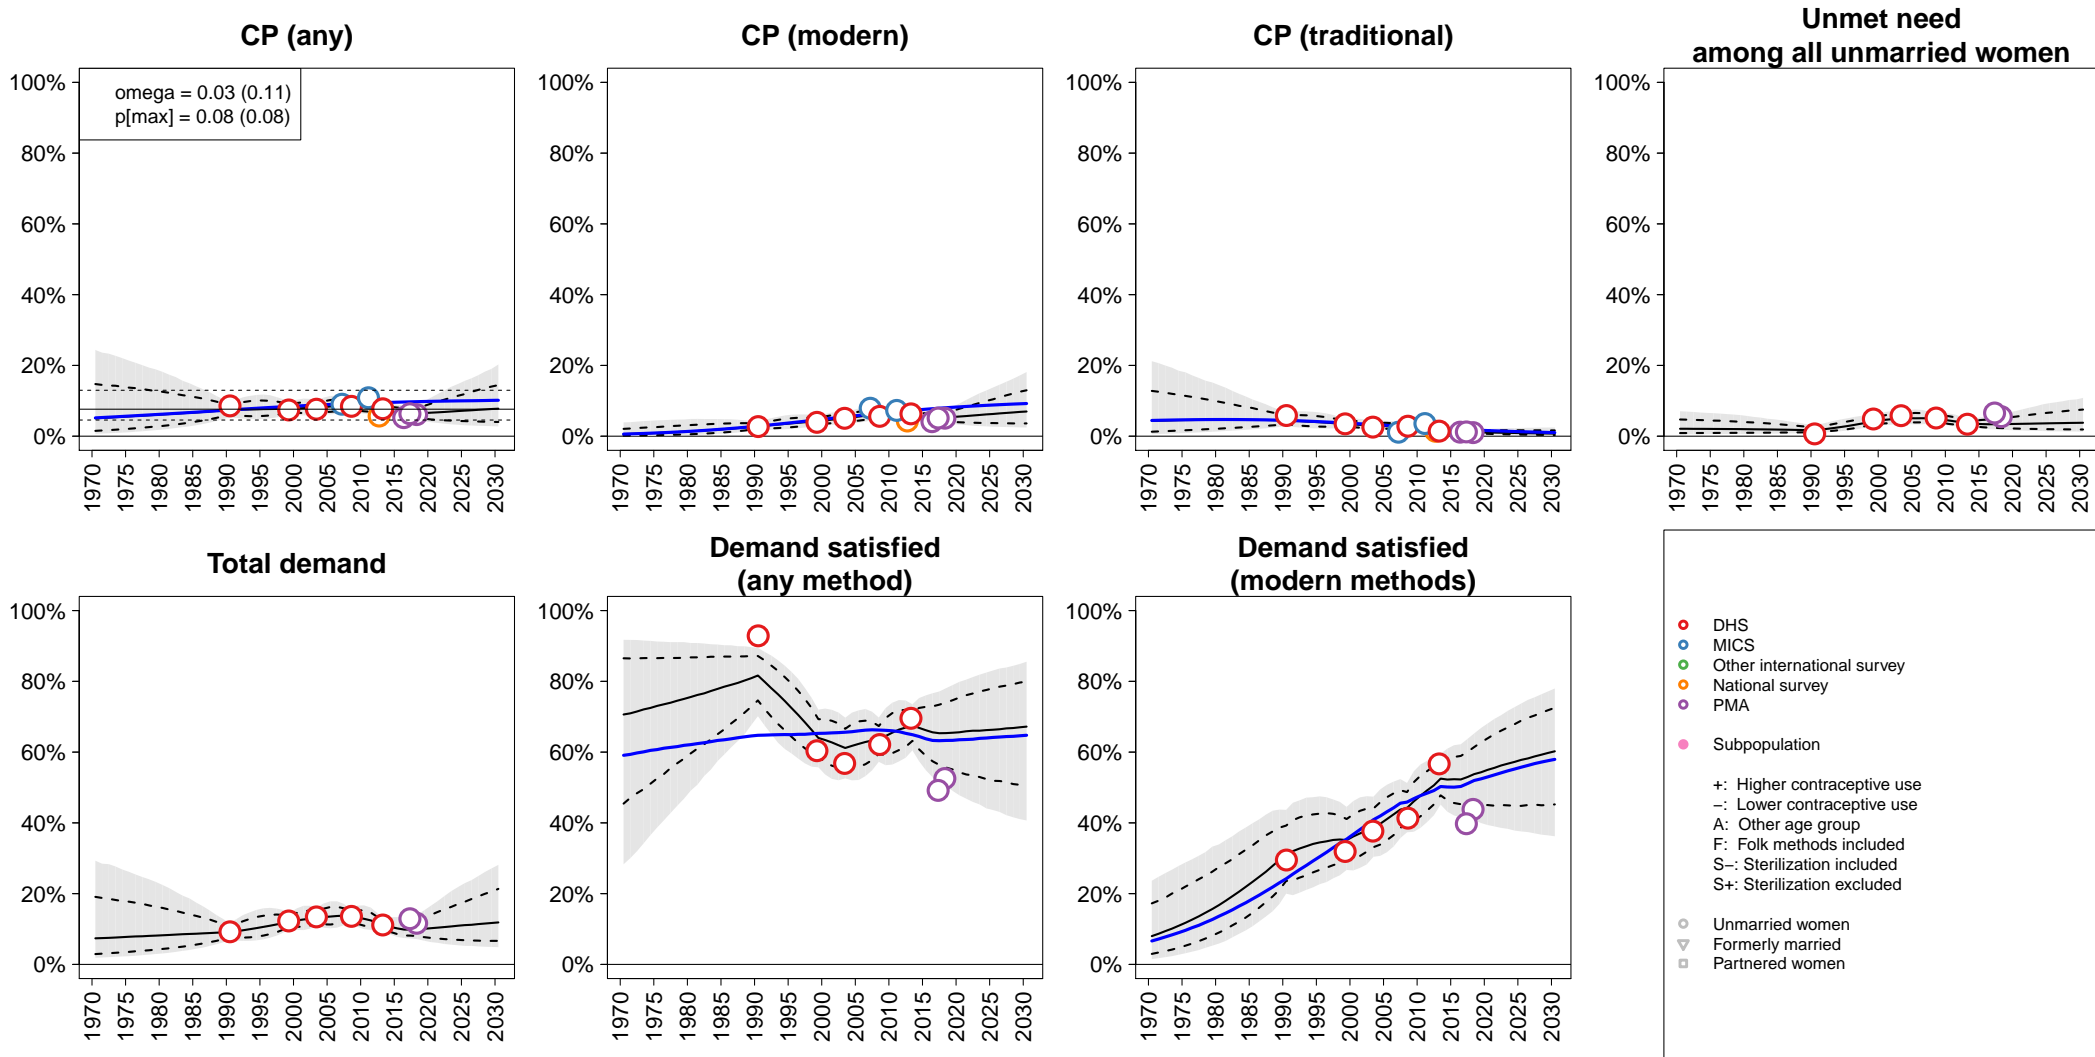

Papua New Guinea (Melanesia, SA Group 1) --- Unmarried / Not In-Union

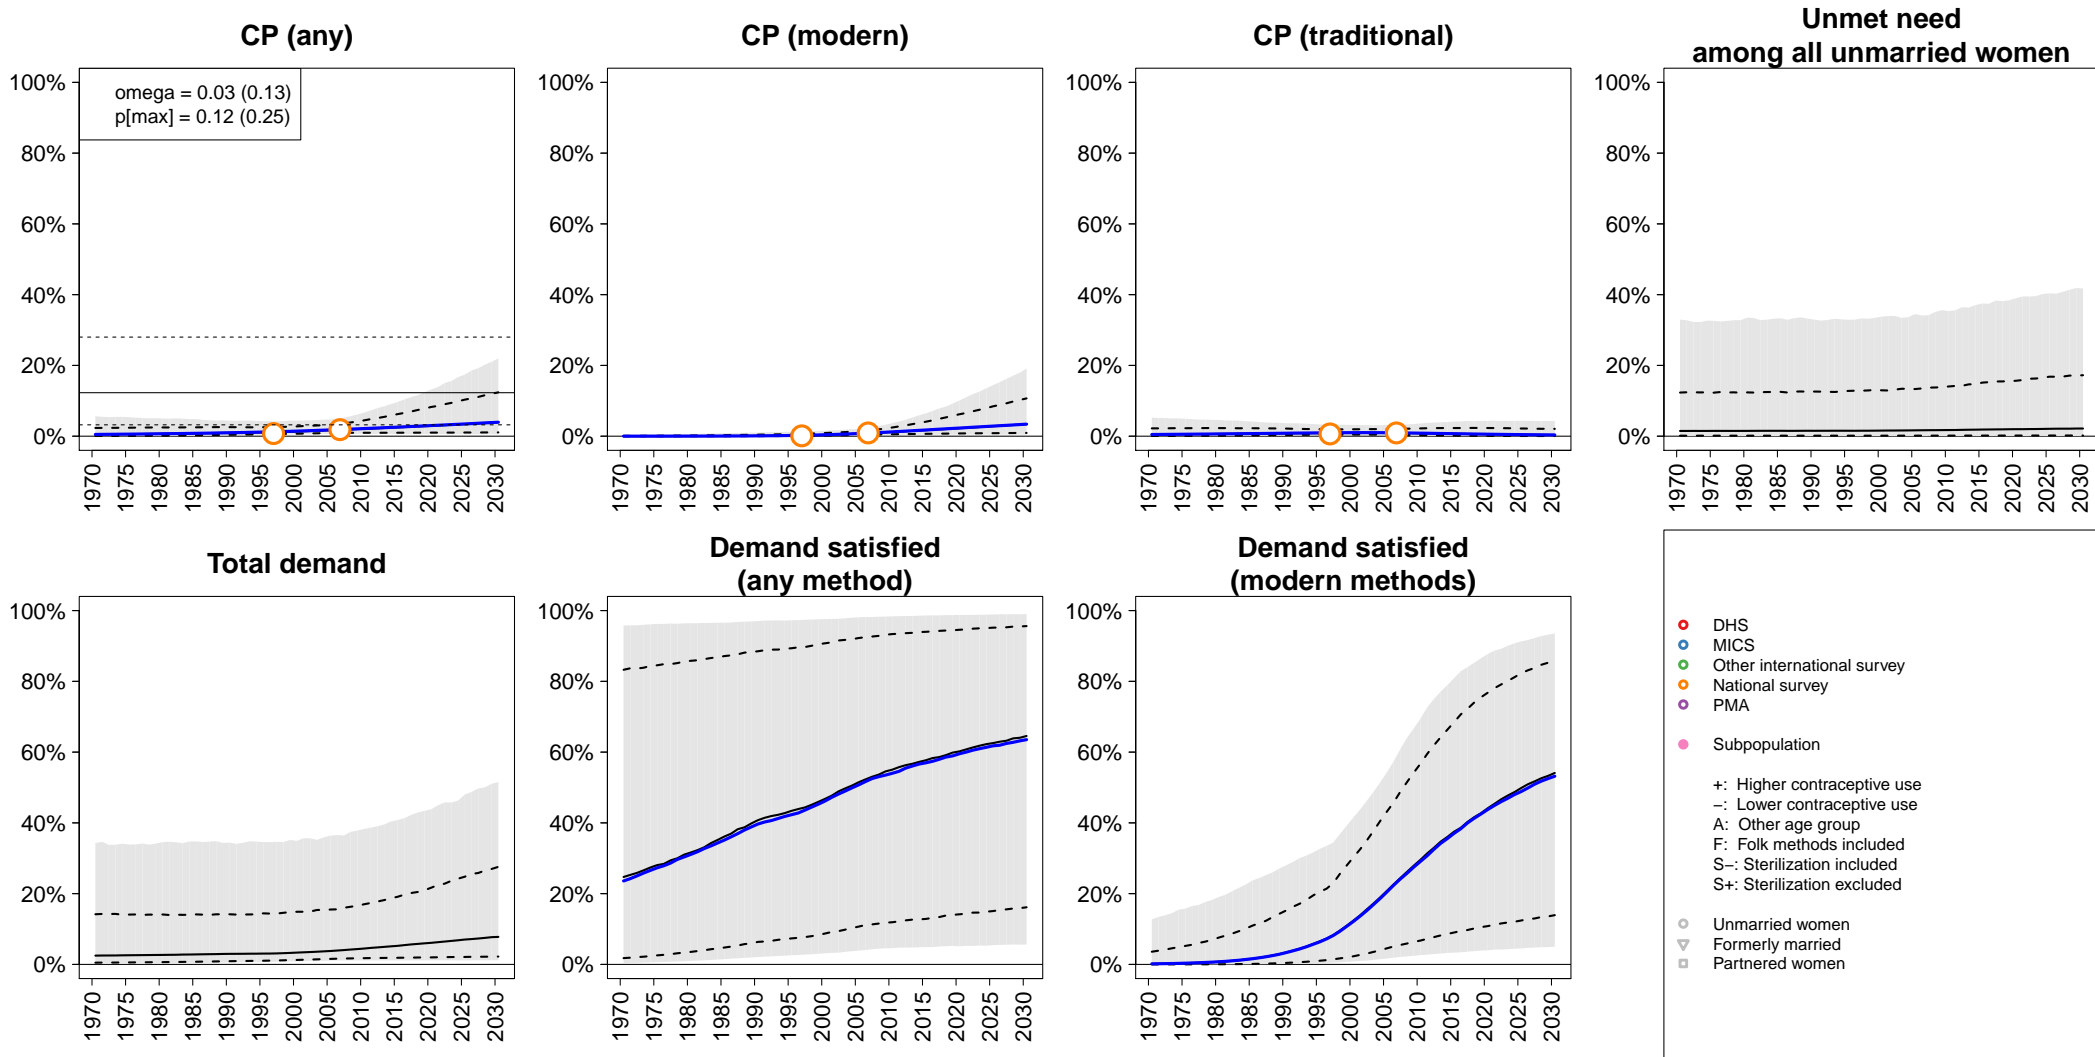

Paraguay (South America, SA Group 1) --- Unmarried / Not In-Union

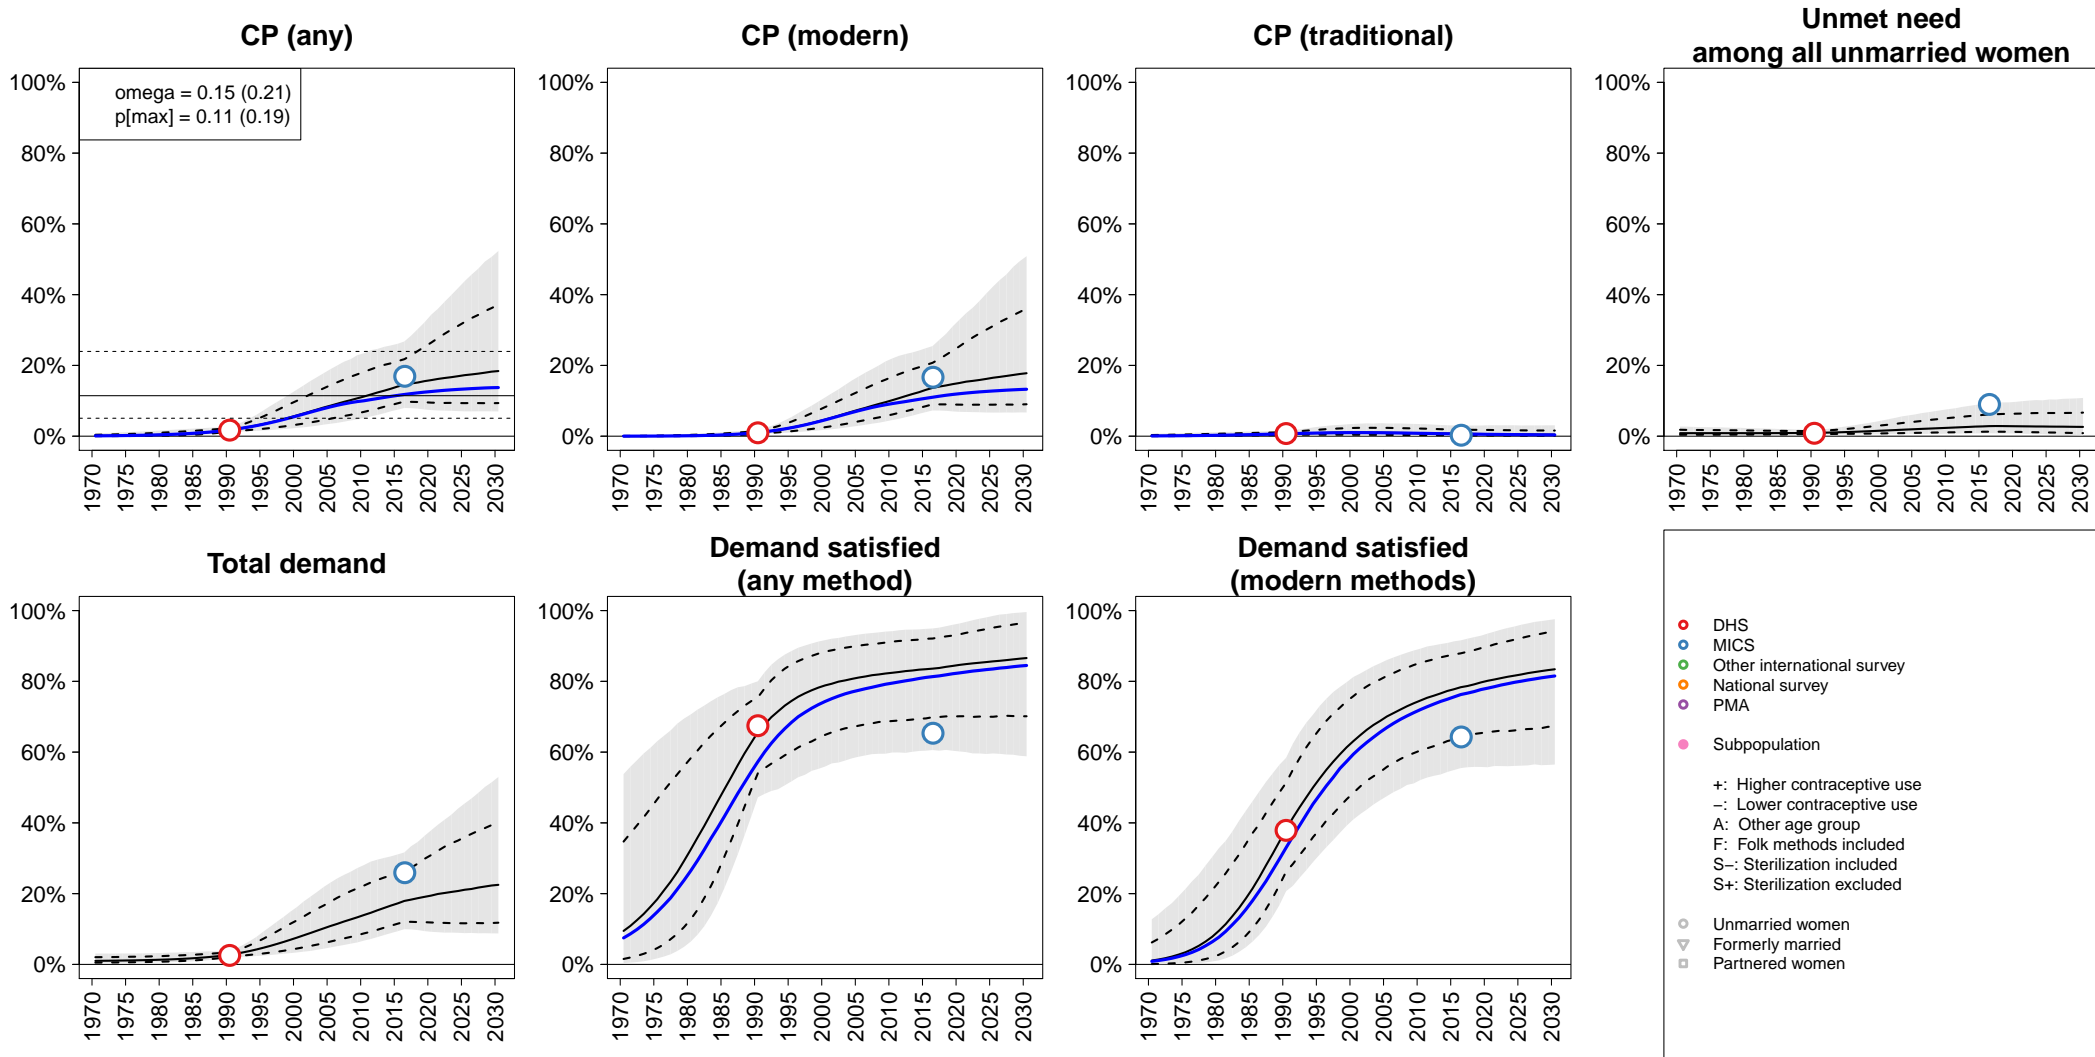

Peru (South America, SA Group 1) --- Unmarried / Not In-Union

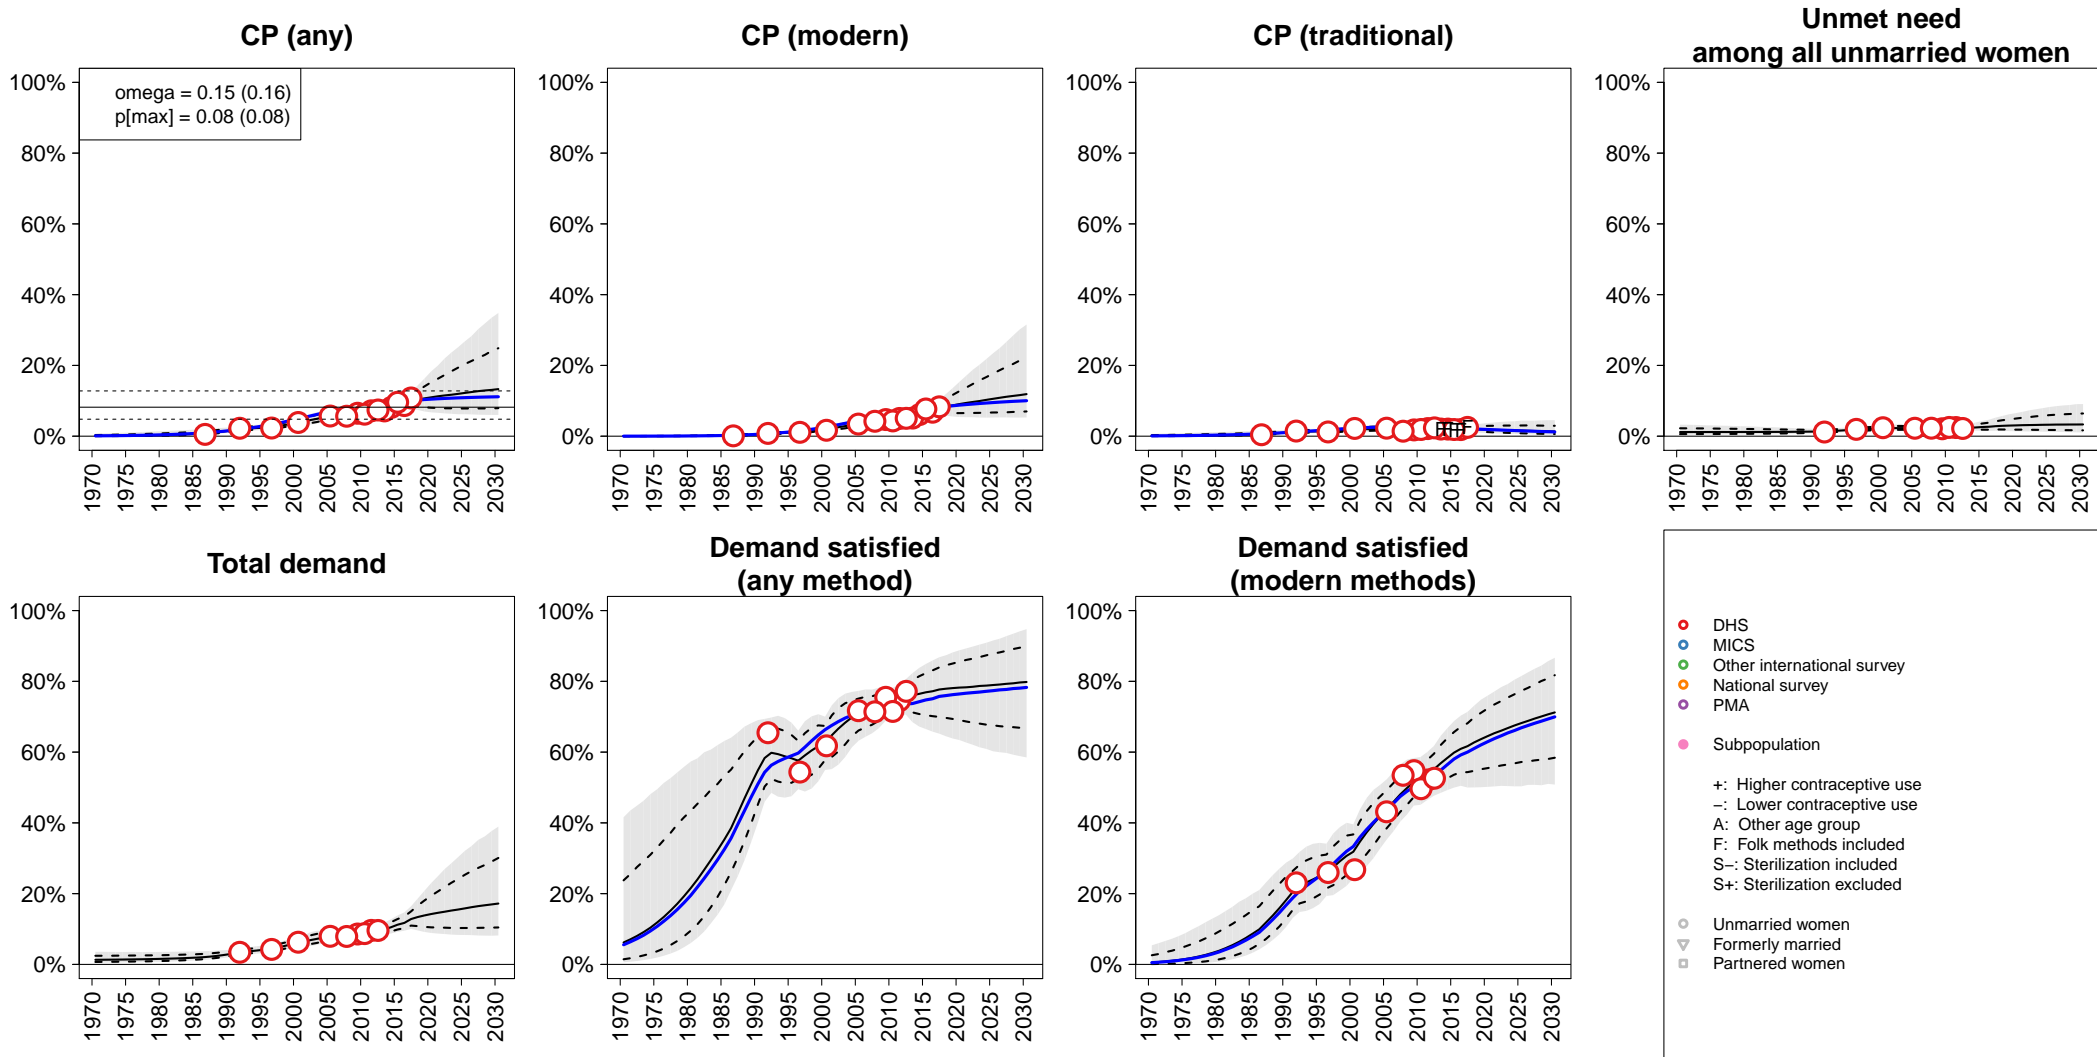

Philippines (South-eastern Asia, SA Group 1) --- Unmarried / Not In-Union

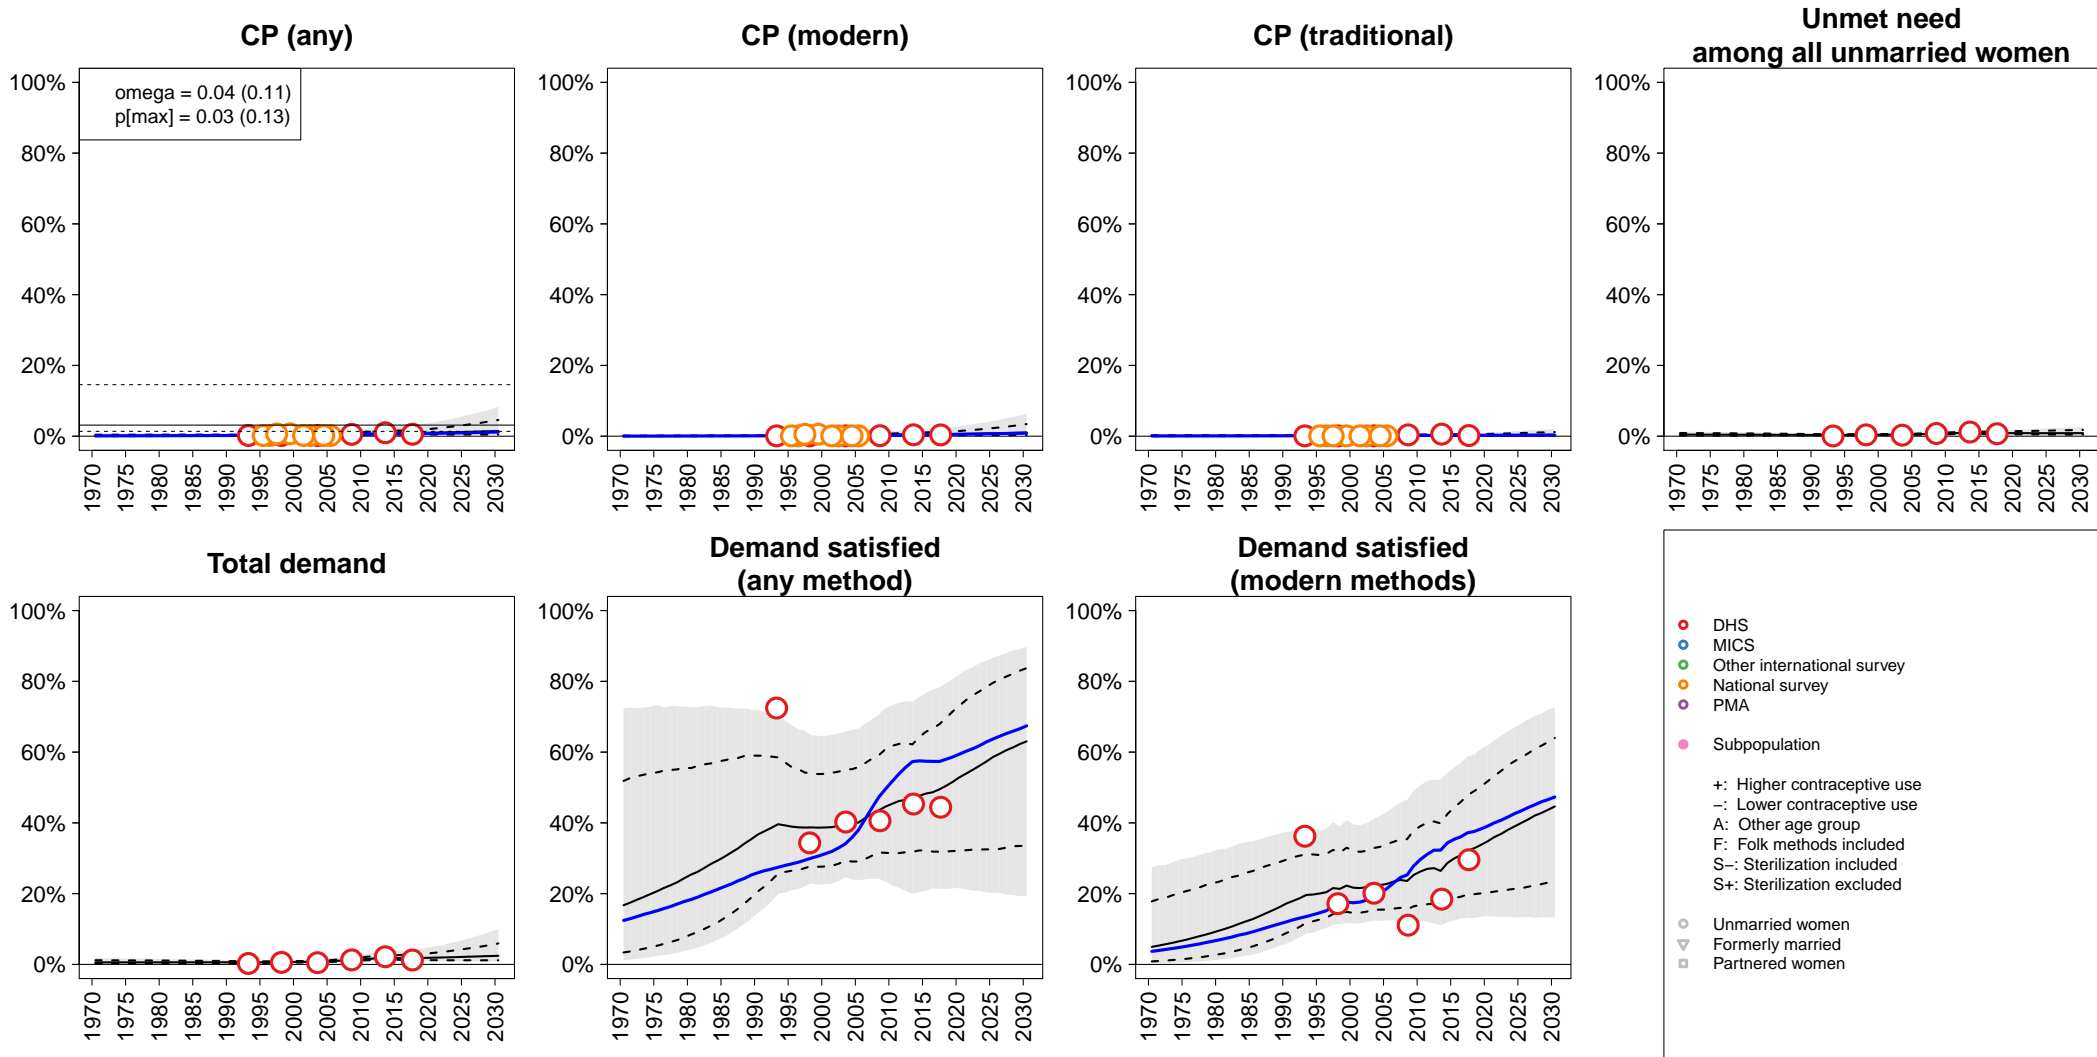

Republic of Moldova (Eastern Europe, SA Group 1) --- Unmarried / Not In-Union

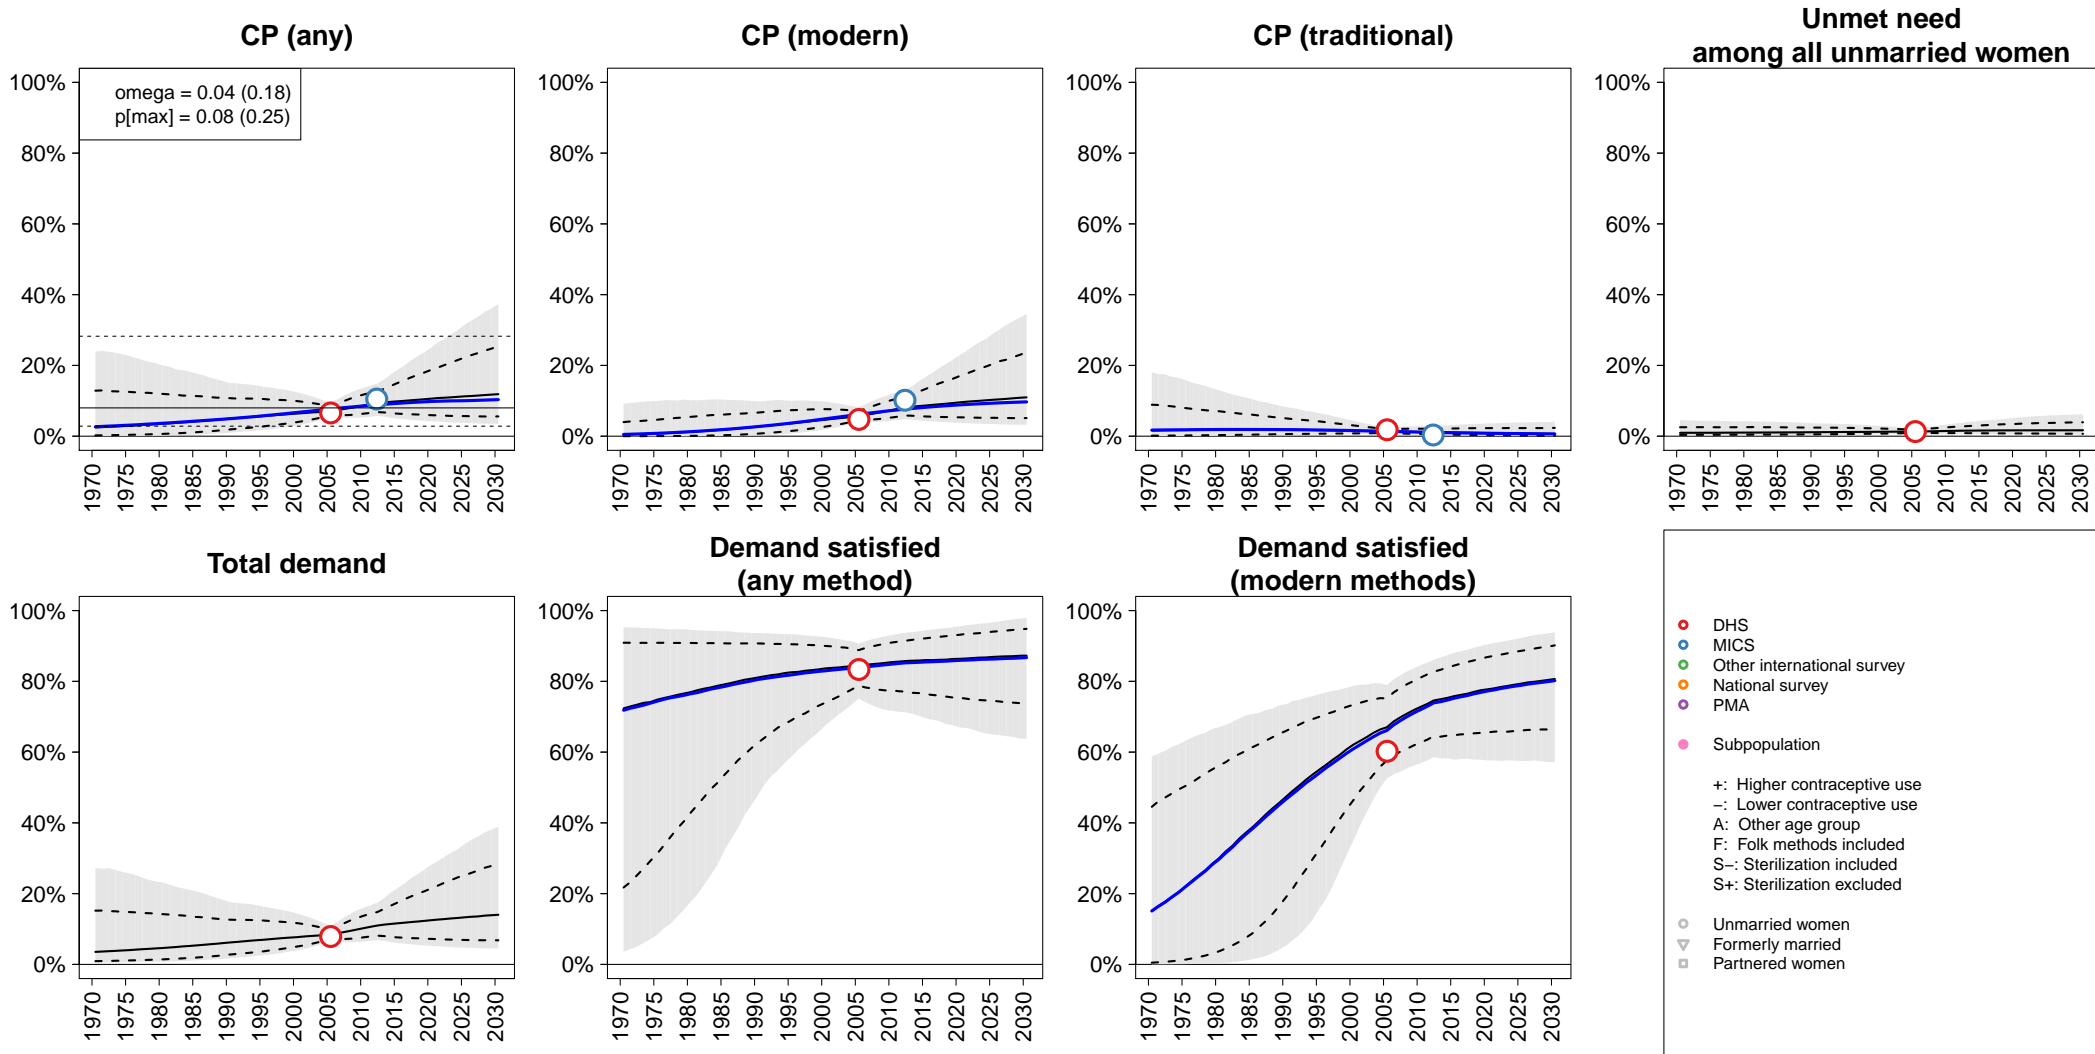

Rwanda (Eastern Africa, SA Group 1) --- Unmarried / Not In-Union

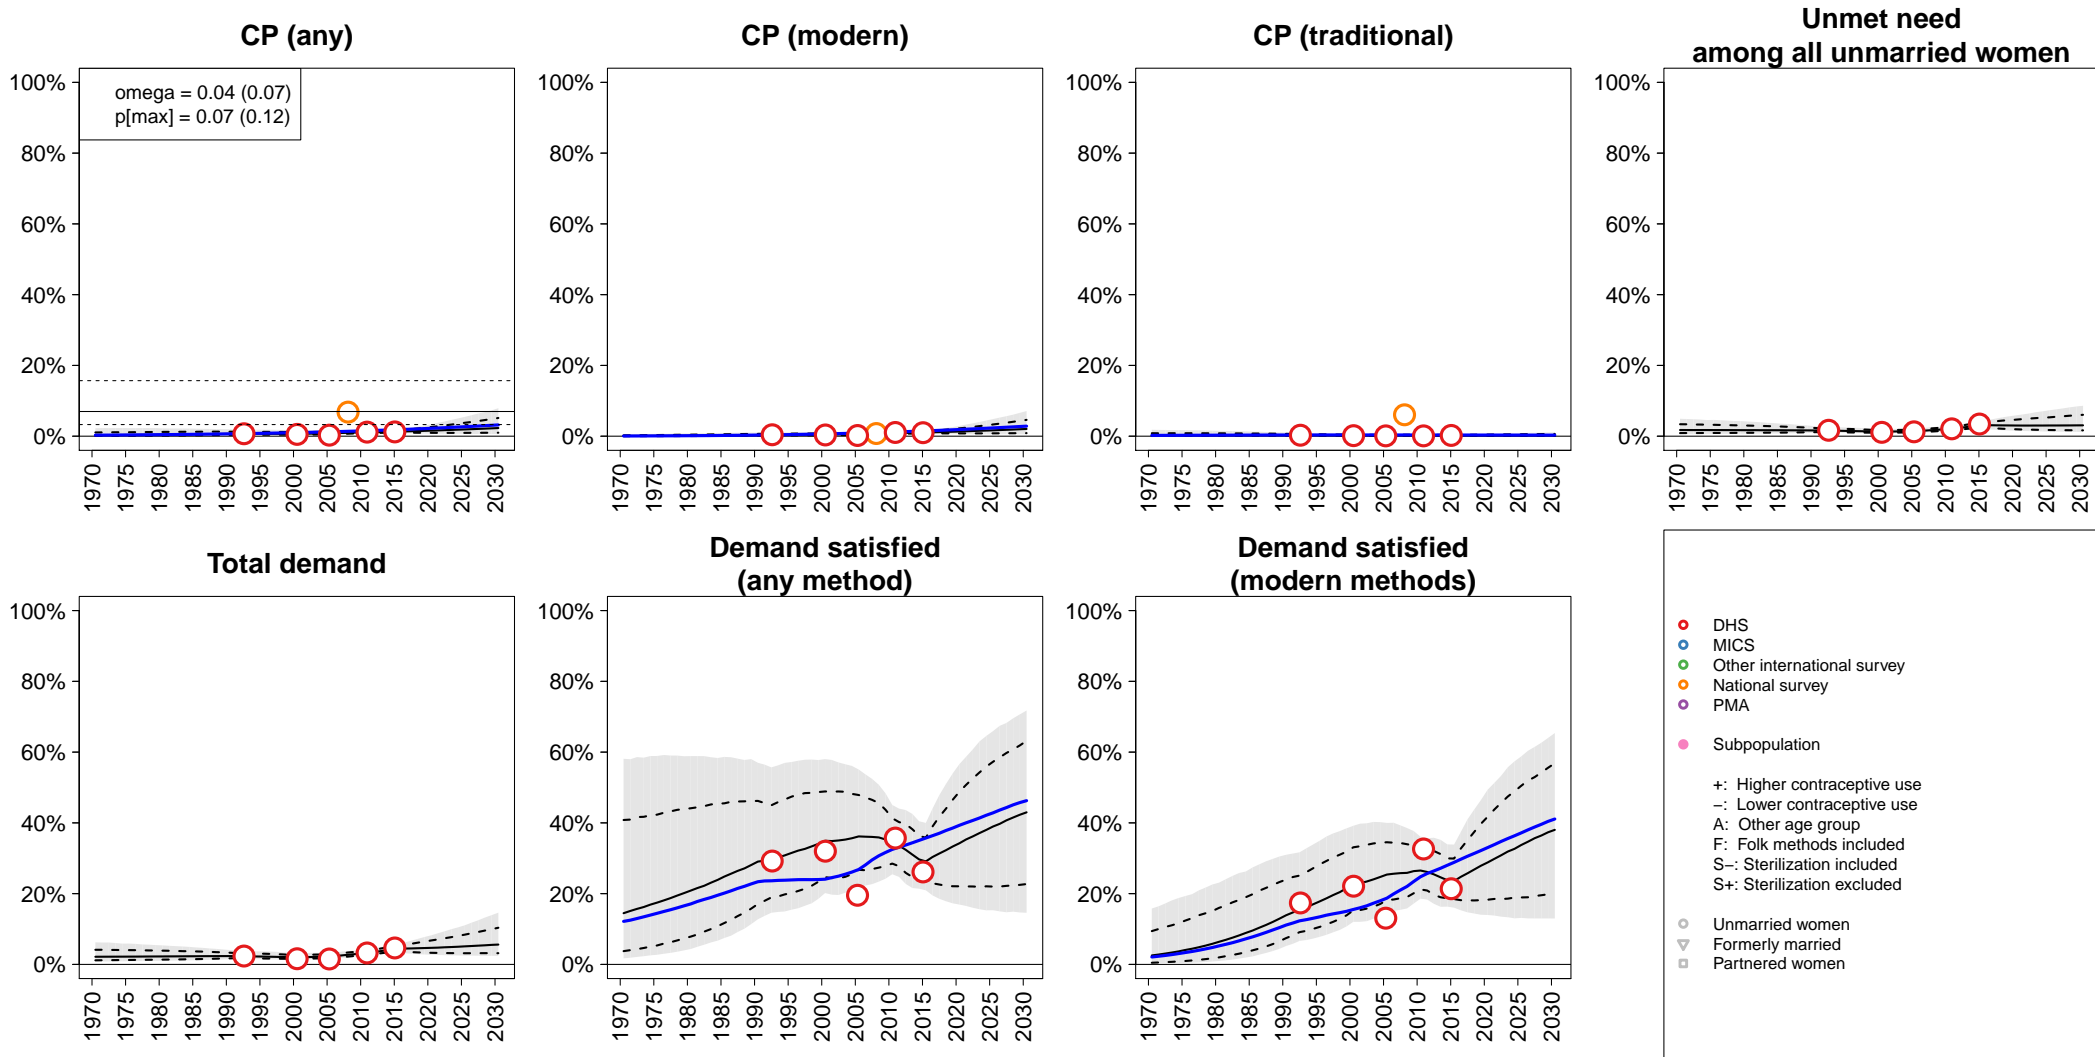



Samoa (Polynesia, SA Group 1) --- Unmarried / Not In-Union

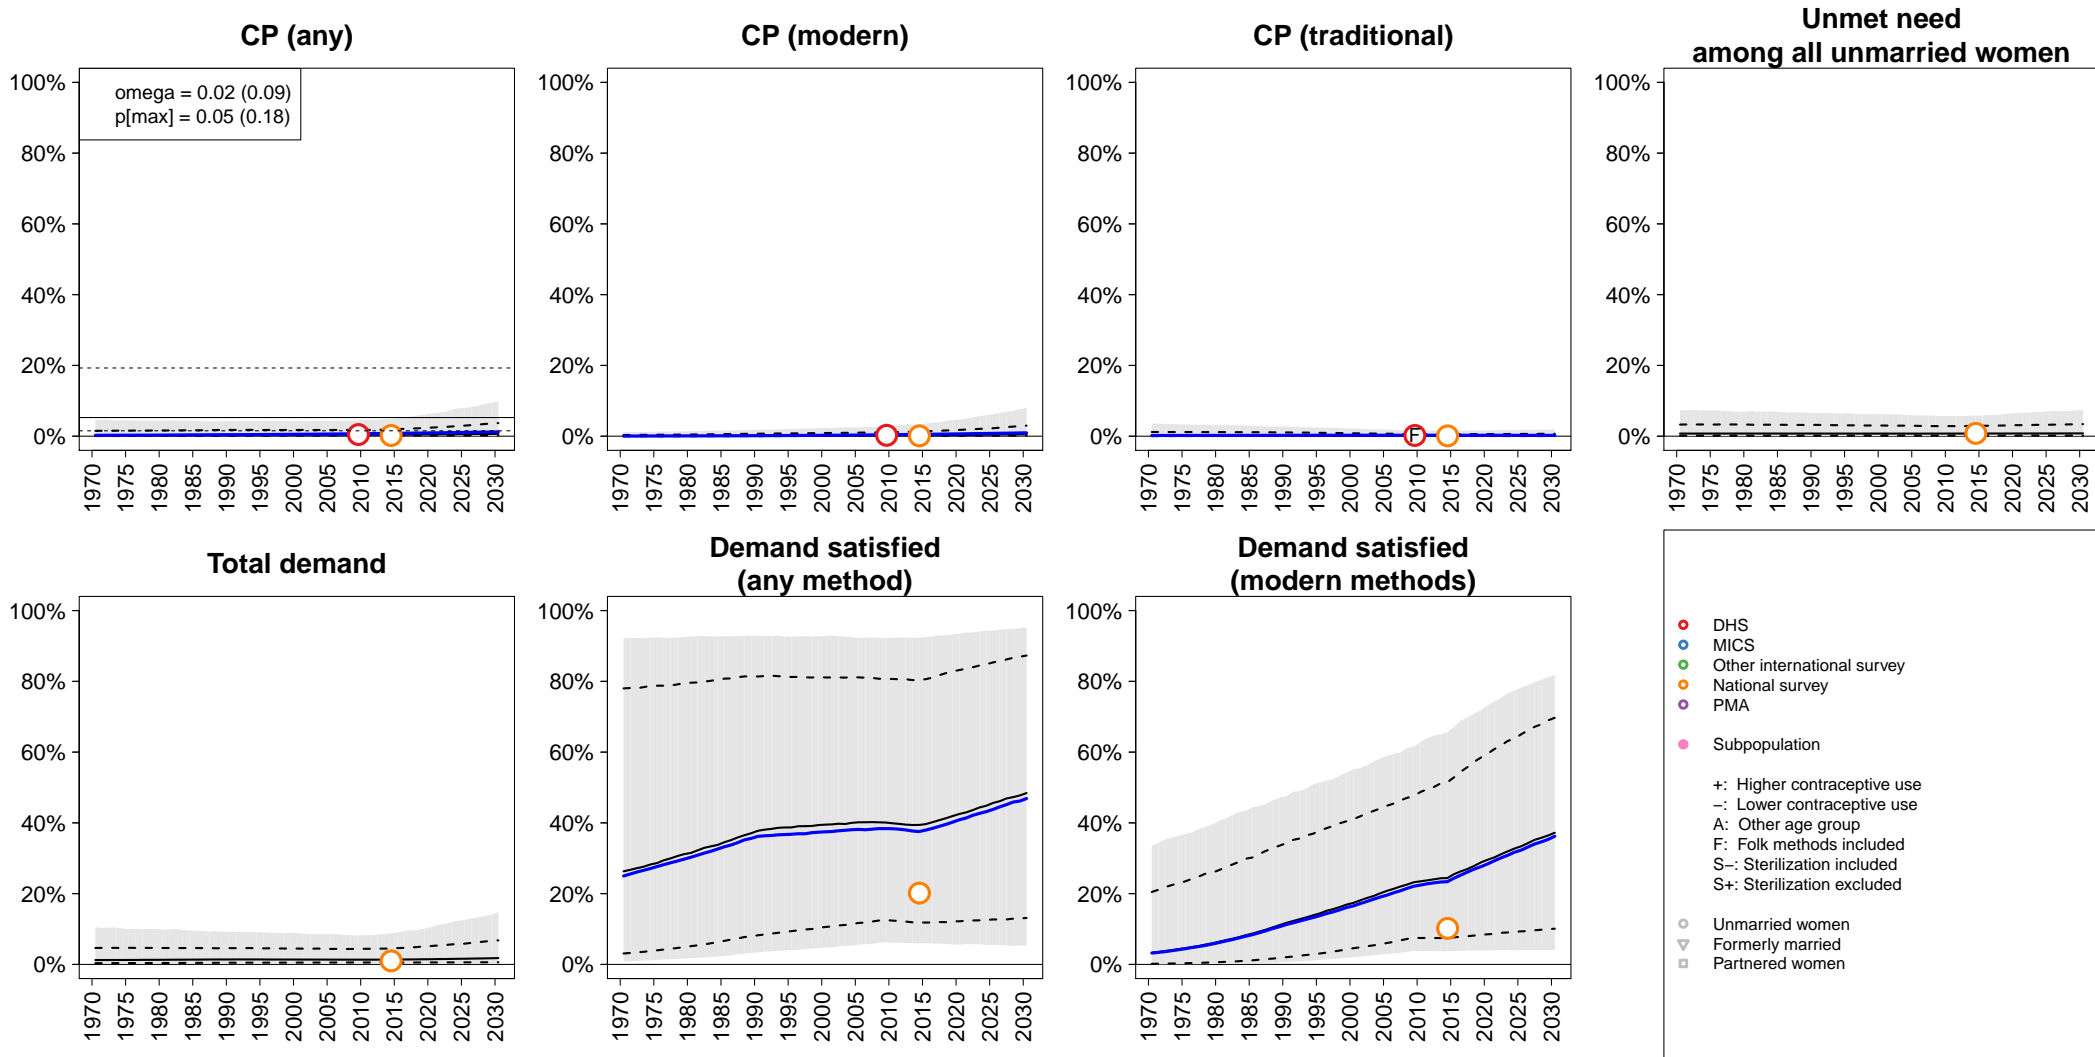

Sao Tome and Principe (Middle Africa, SA Group 1) --- Unmarried / Not In-Union

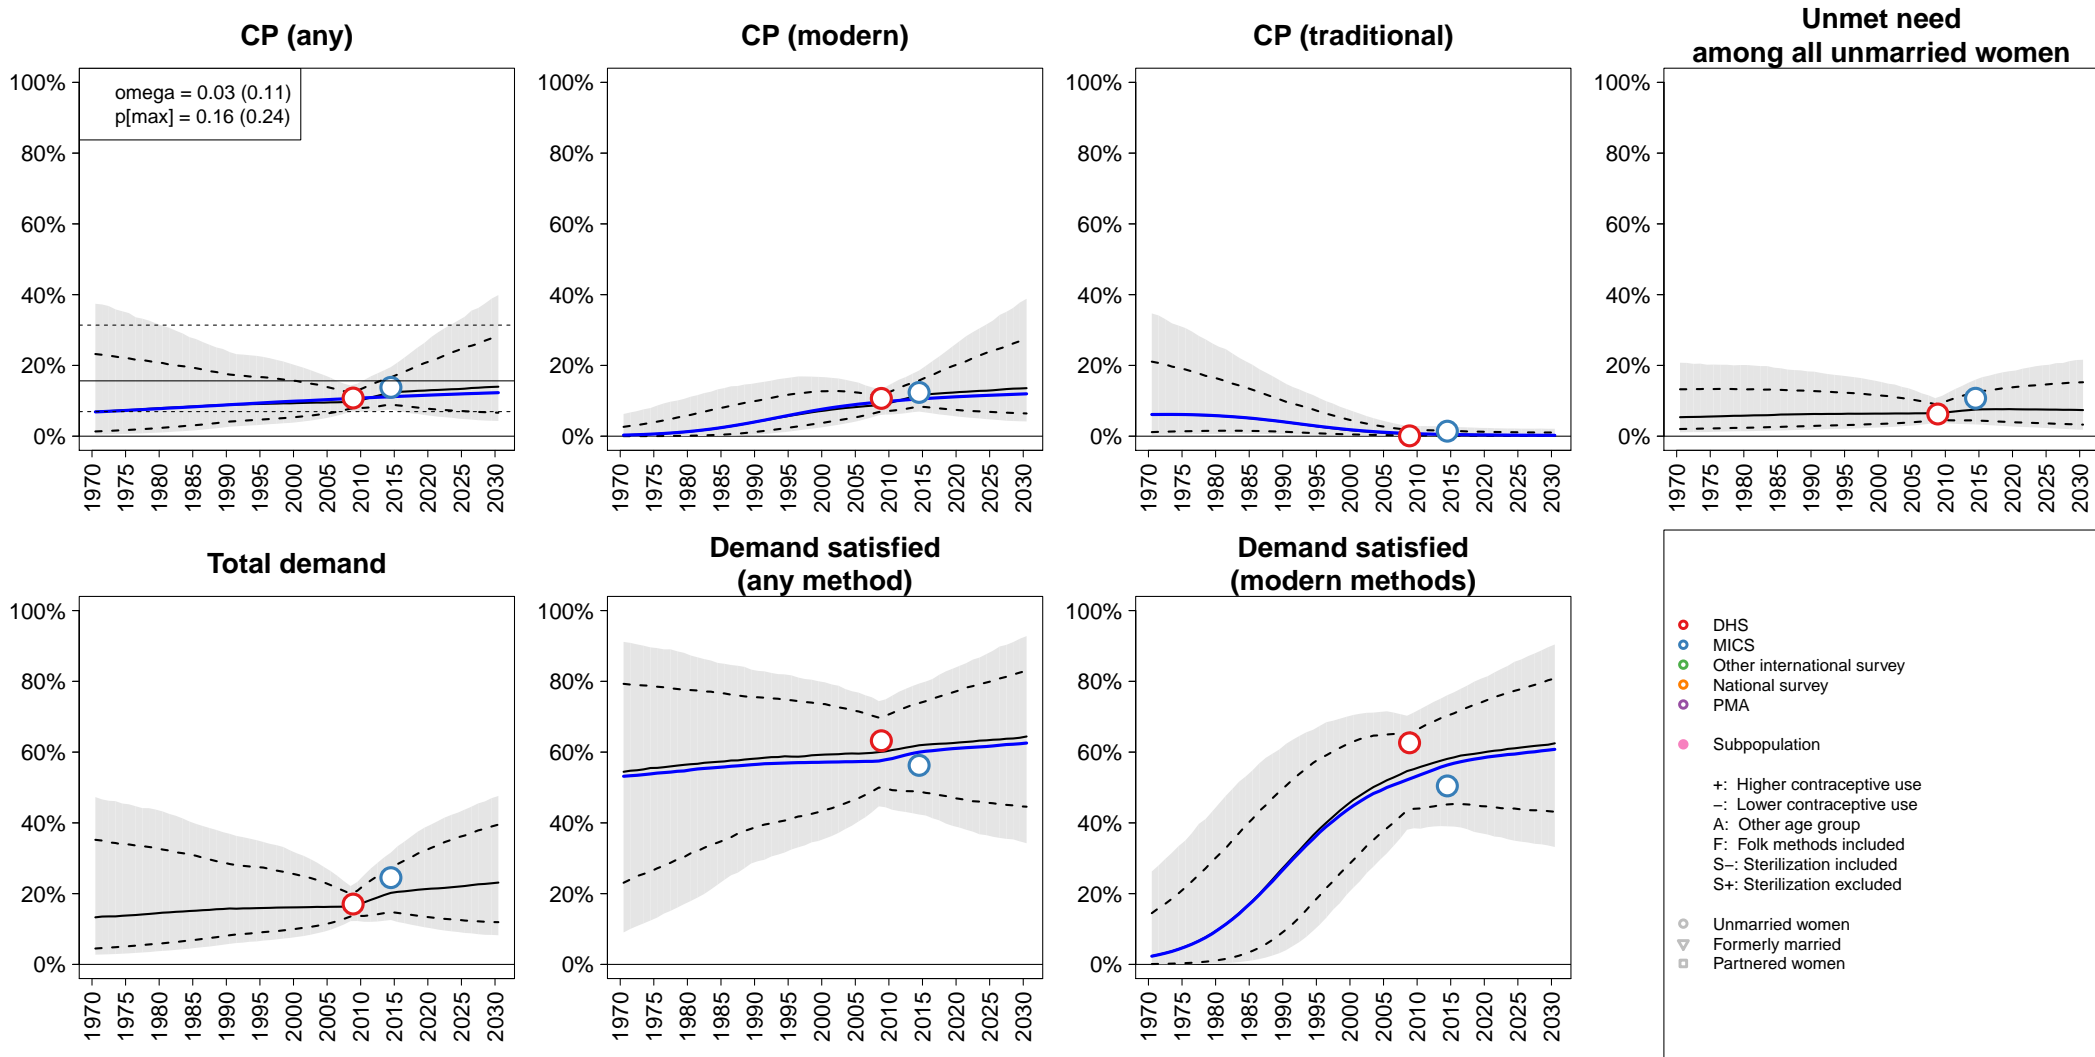

Senegal (Western Africa, SA Group 1) --- Unmarried / Not In-Union

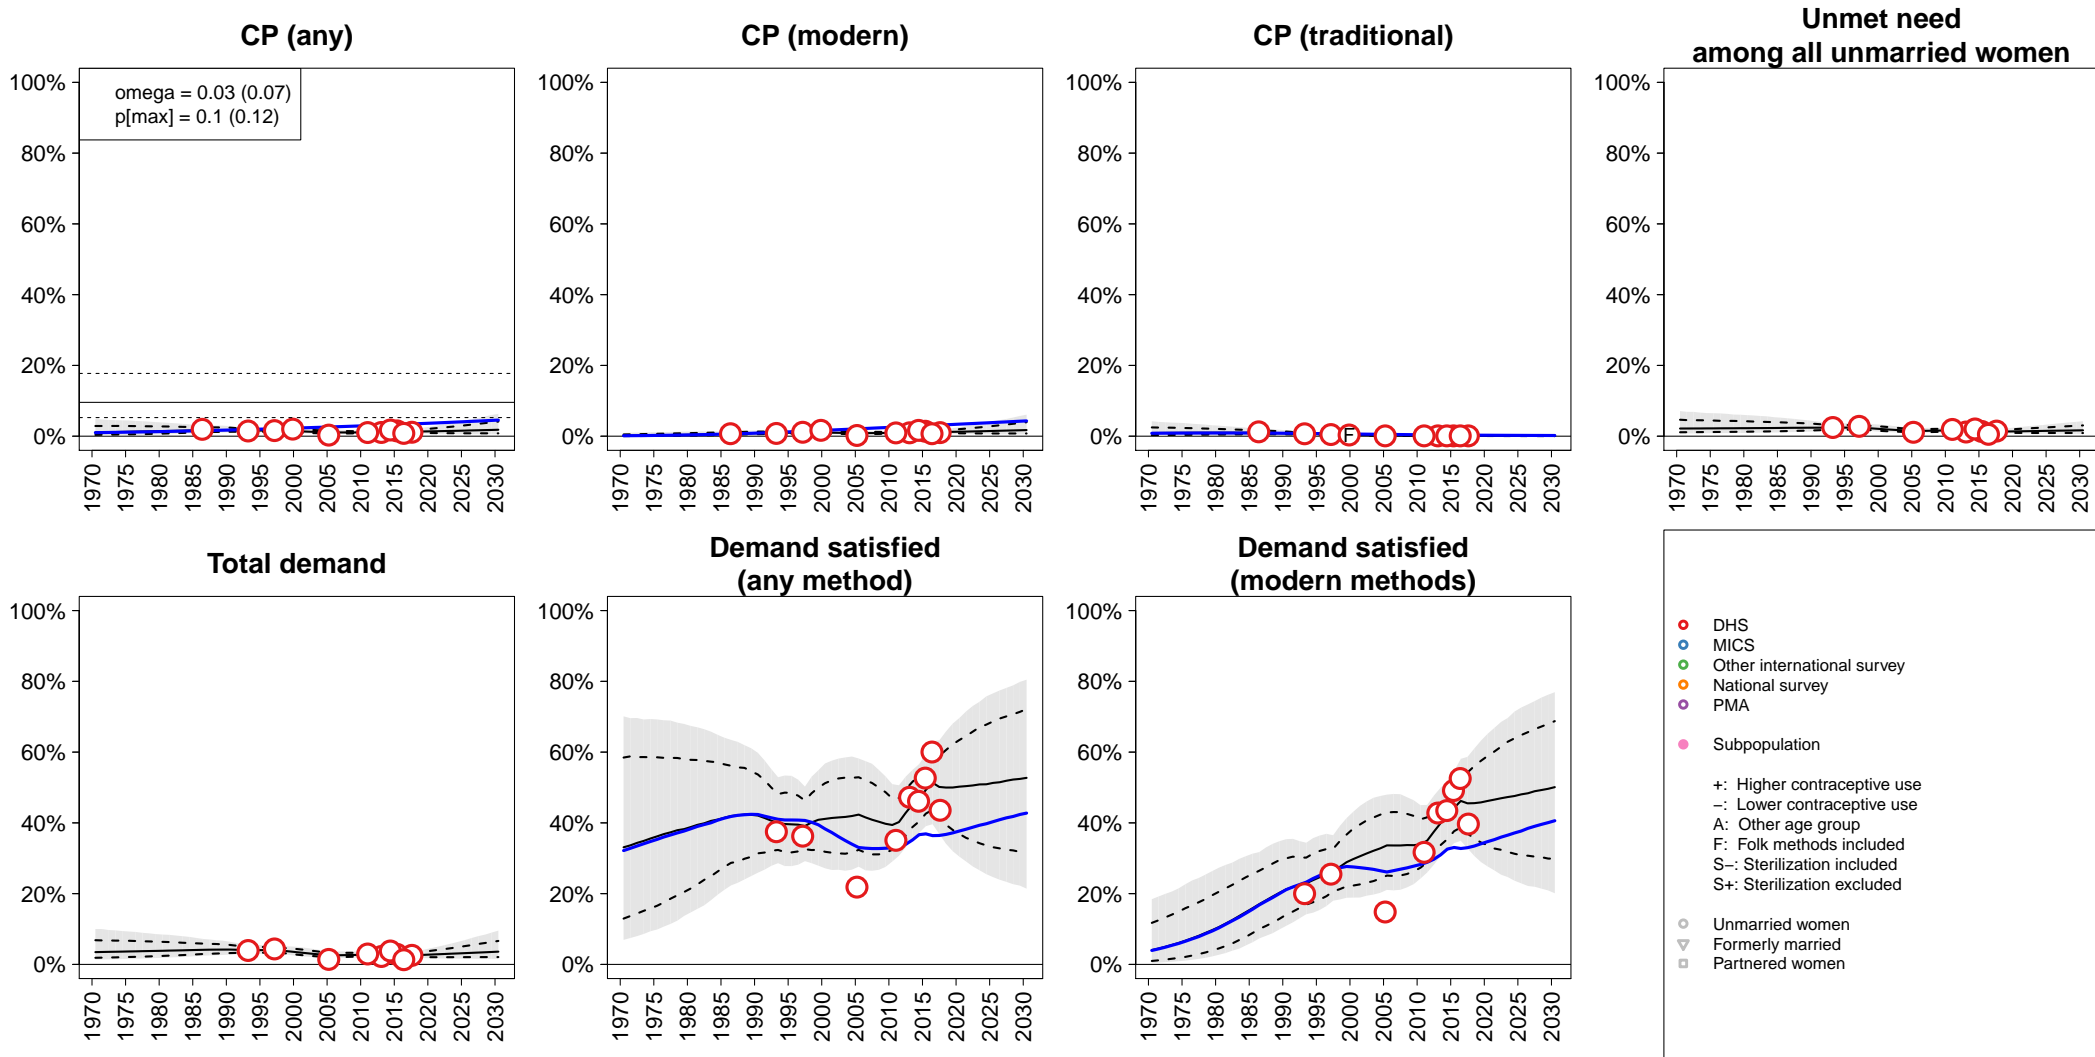

Serbia (Southern Europe, SA Group 1) --- Unmarried / Not In-Union

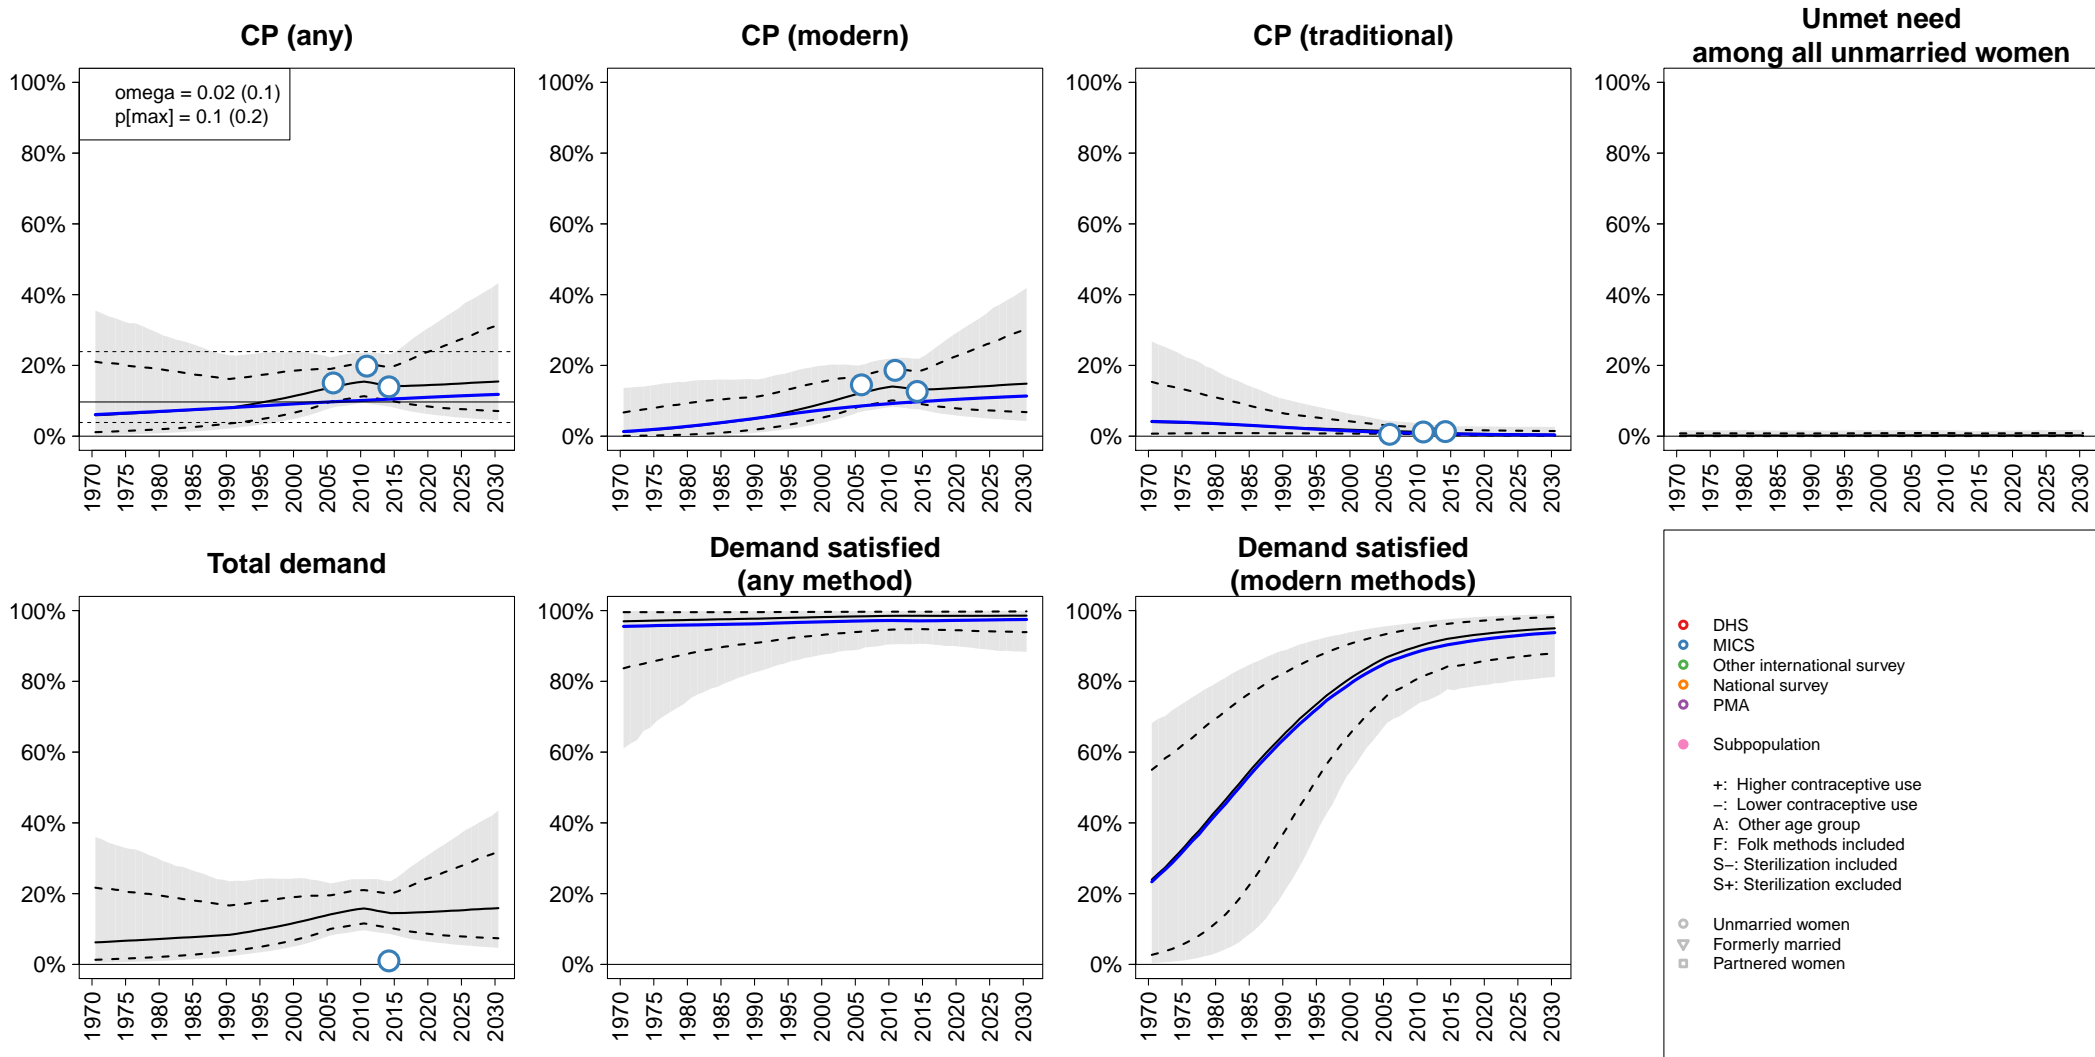

Sierra Leone (Western Africa, SA Group 1) --- Unmarried / Not In-Union

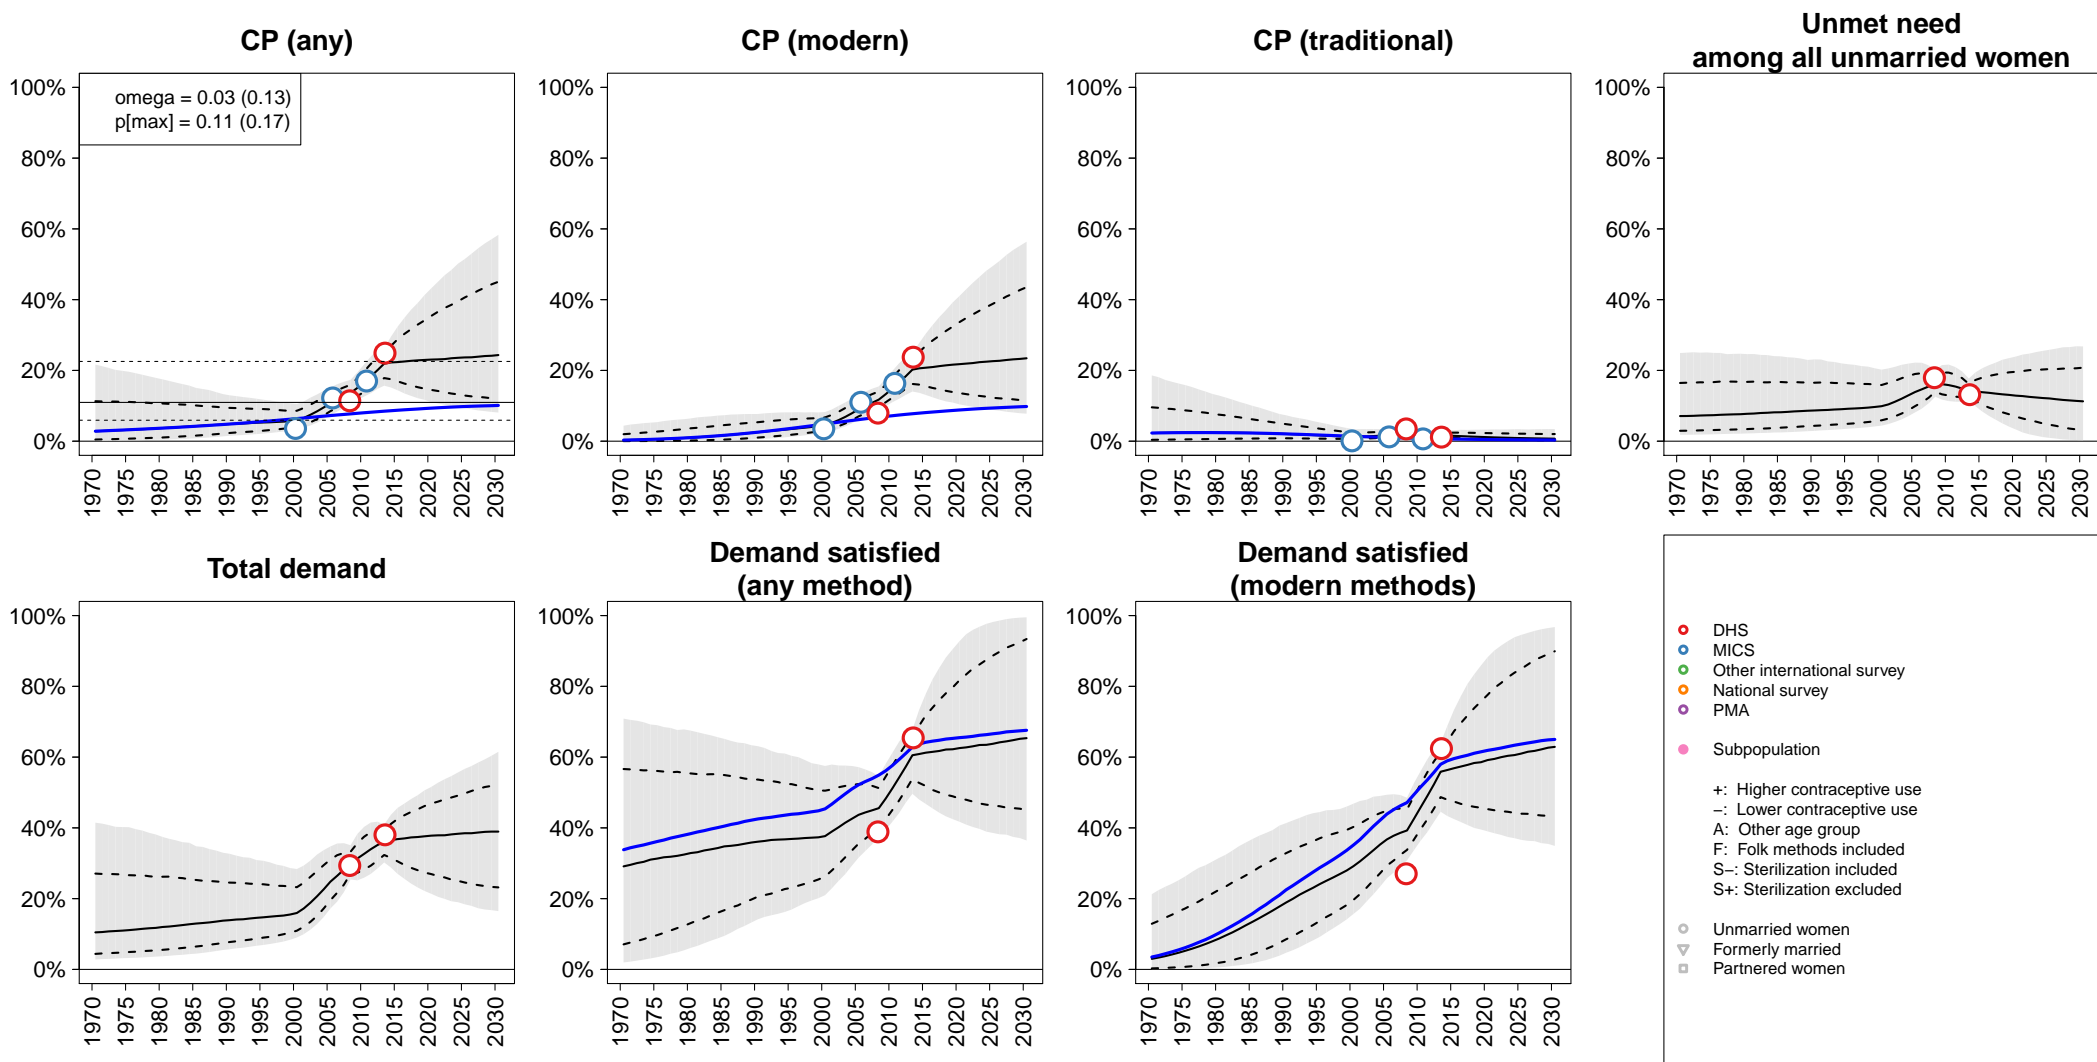

Solomon Islands (Melanesia, SA Group 1) --- Unmarried / Not In-Union

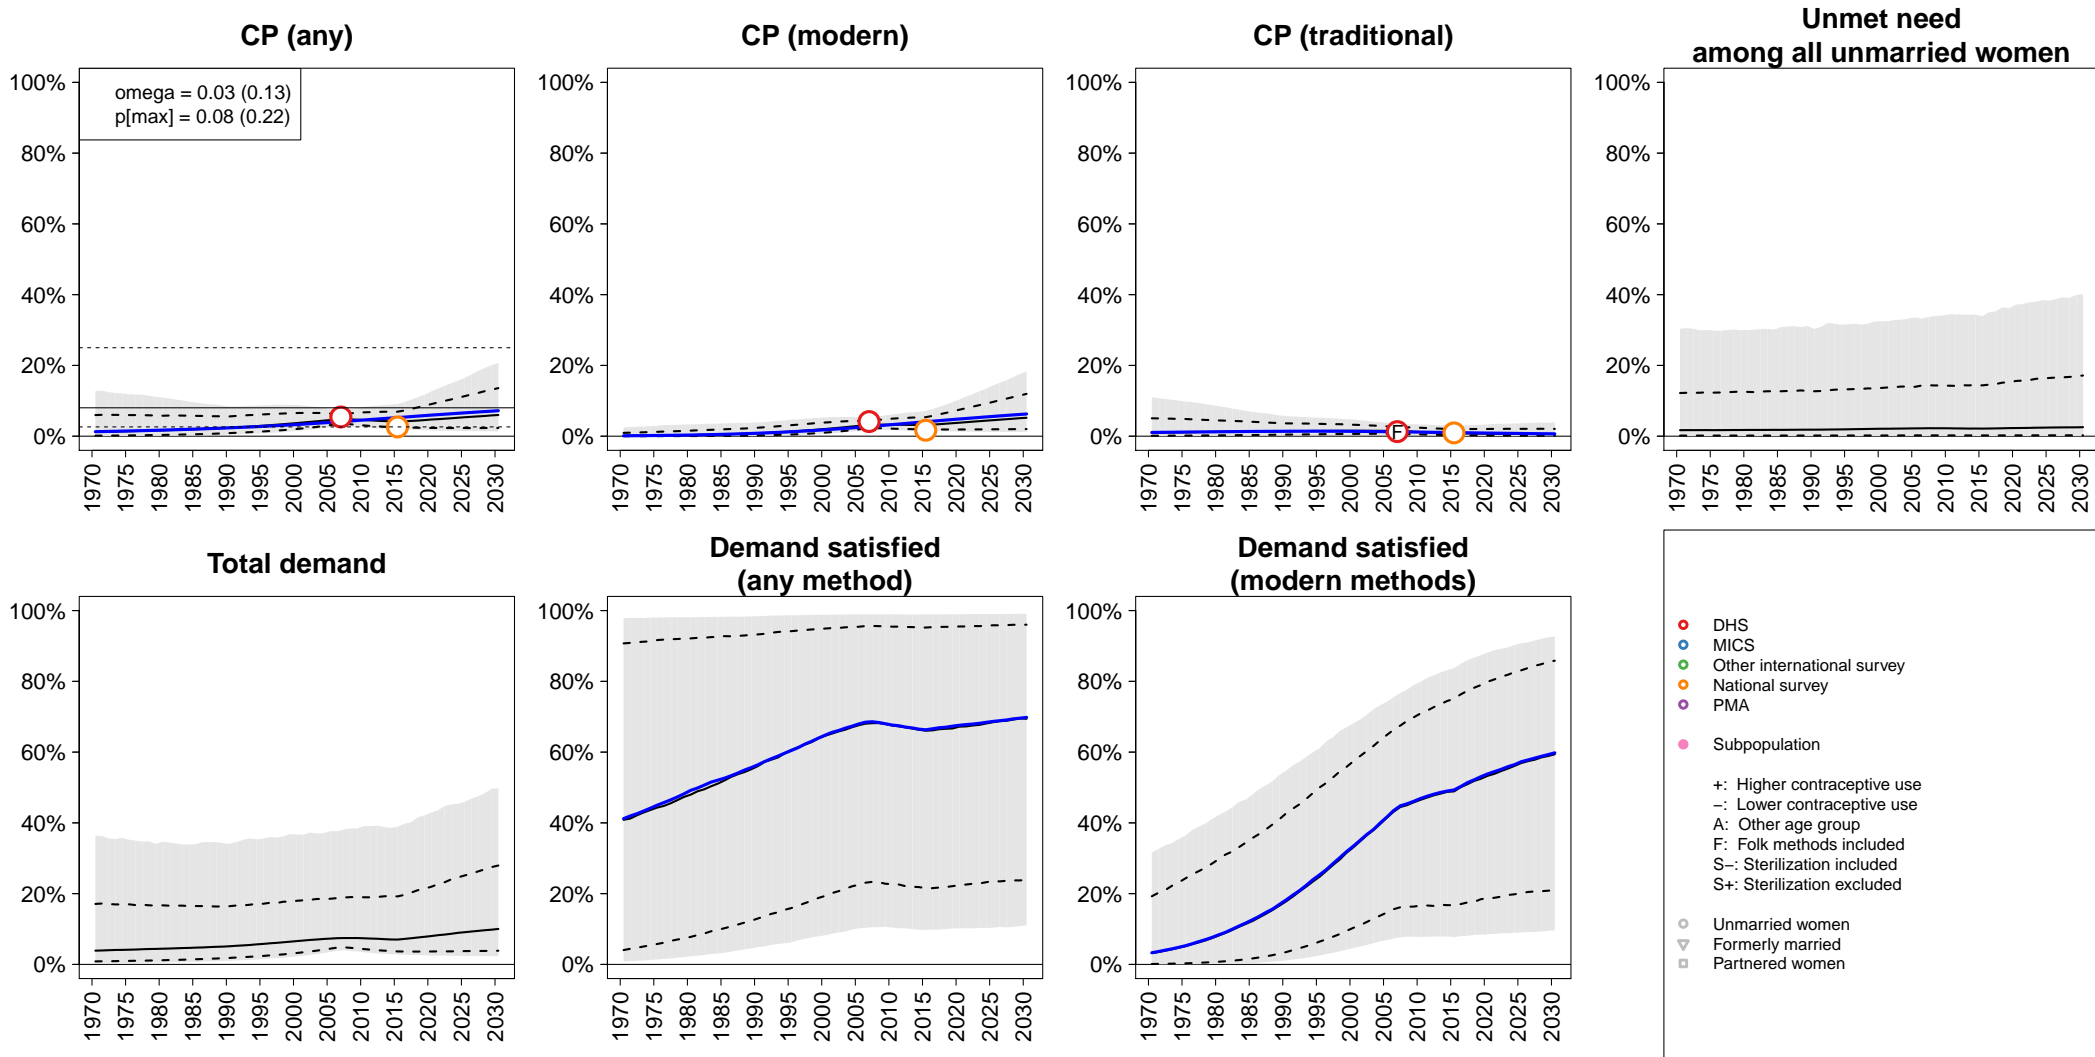

South Africa (Southern Africa, SA Group 1) --- Unmarried / Not In-Union

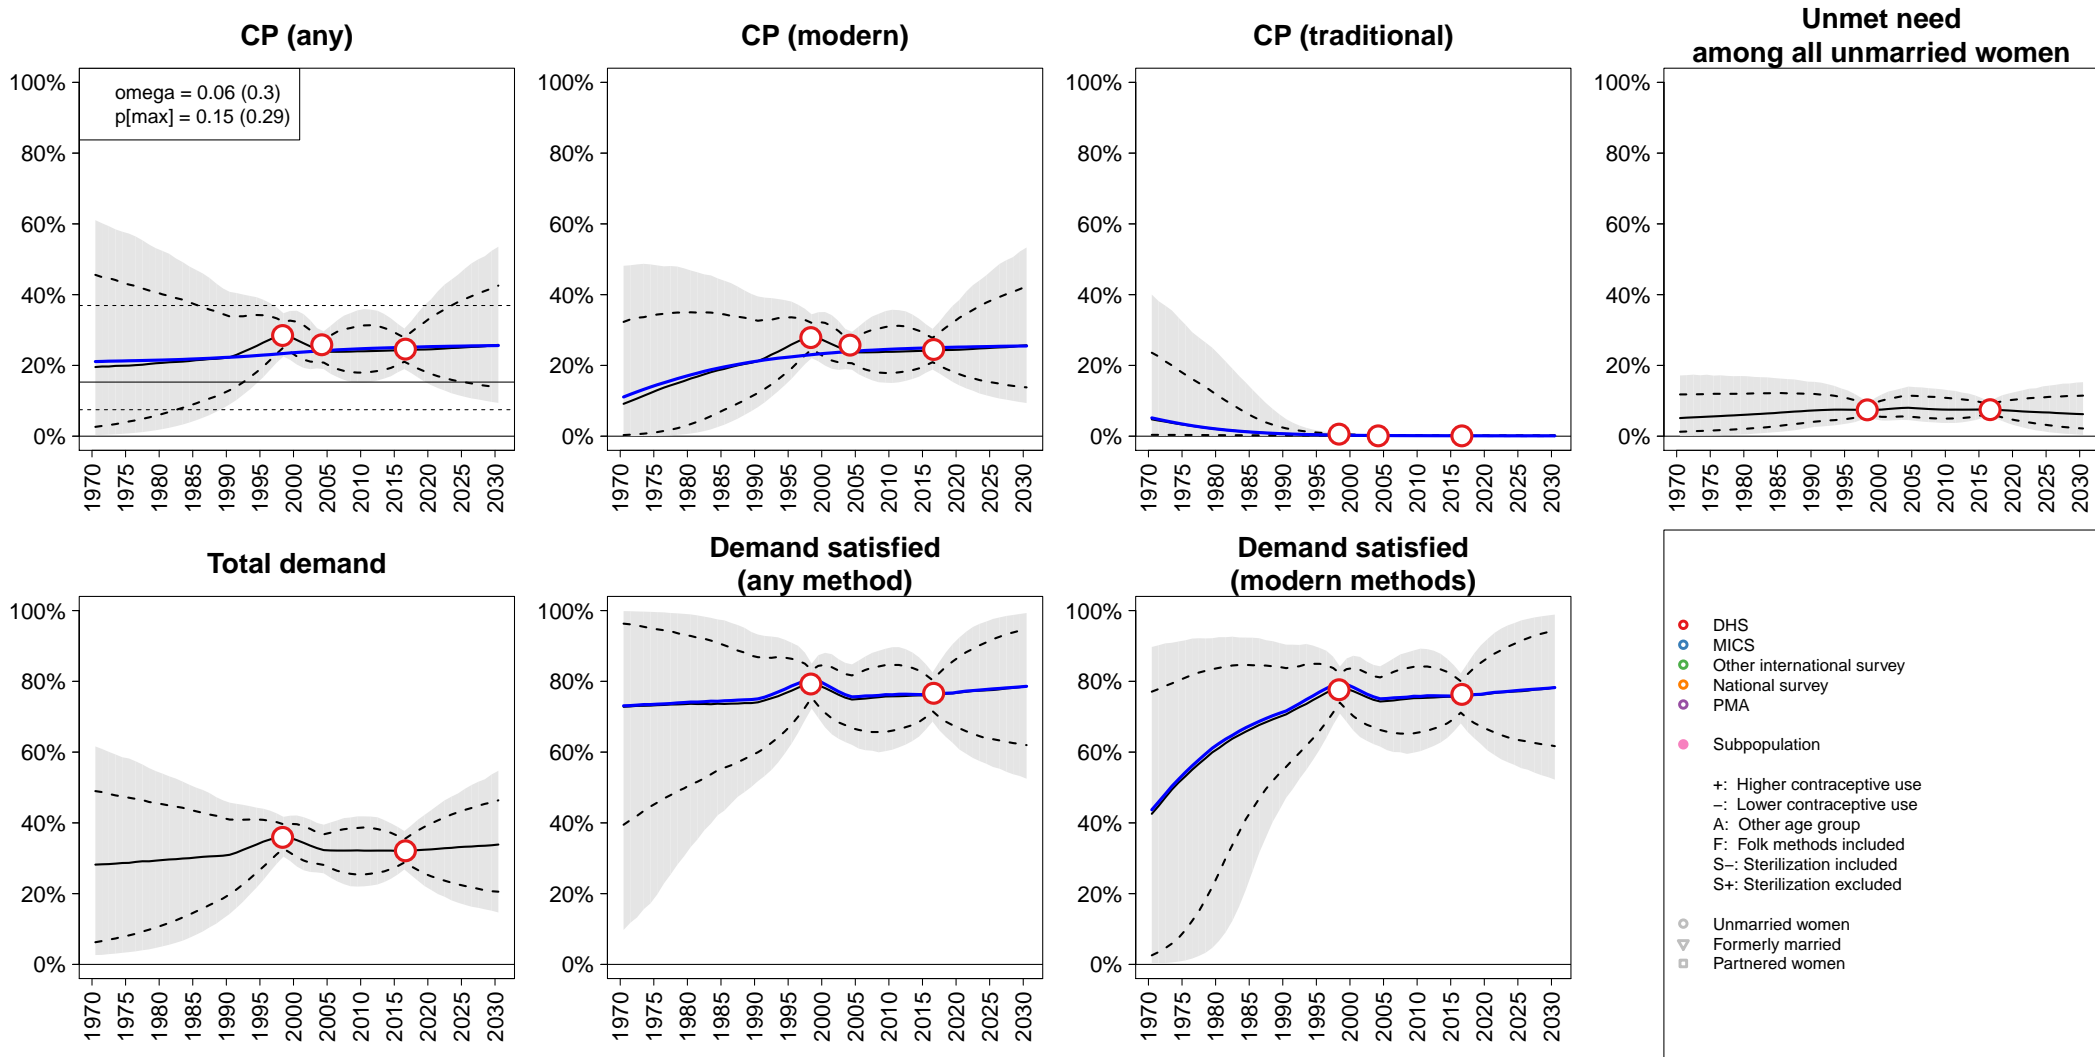

Suriname (South America, SA Group 1) --- Unmarried / Not In-Union

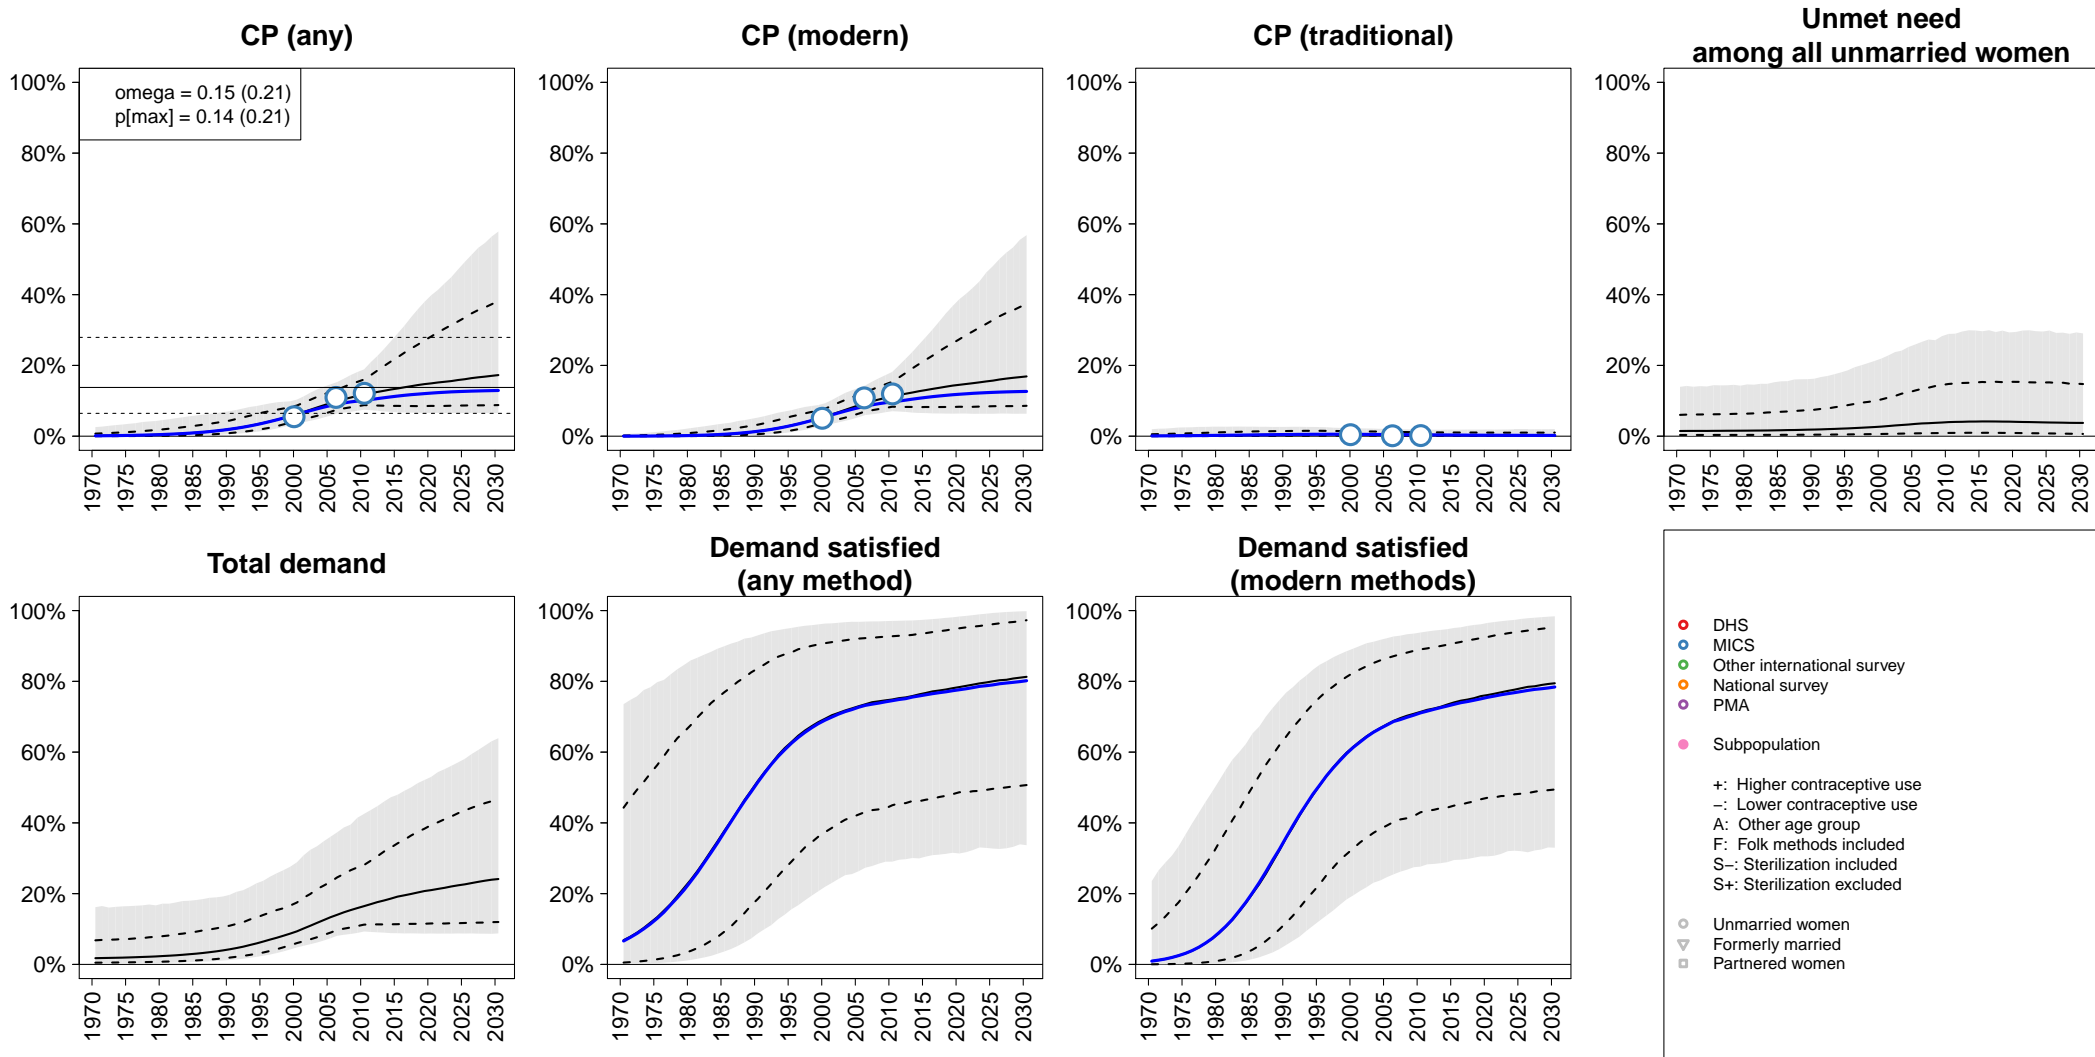



Tajikistan (Central Asia, SA Group 0) --- Unmarried / Not In-Union

CP (any)

CP (modern)

CP (traditional)

Unmet need among all unmarried women

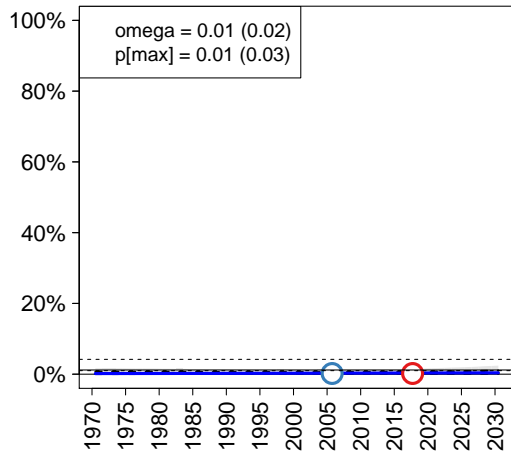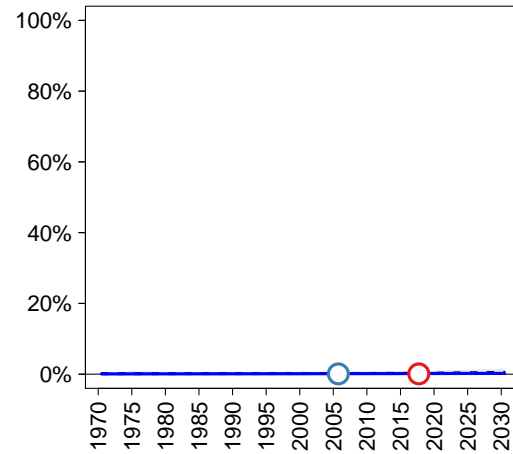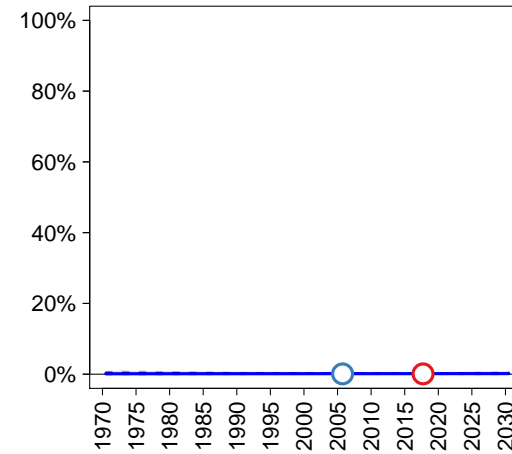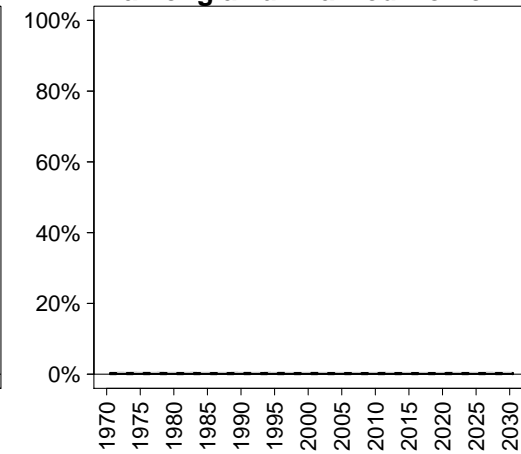

Total demand

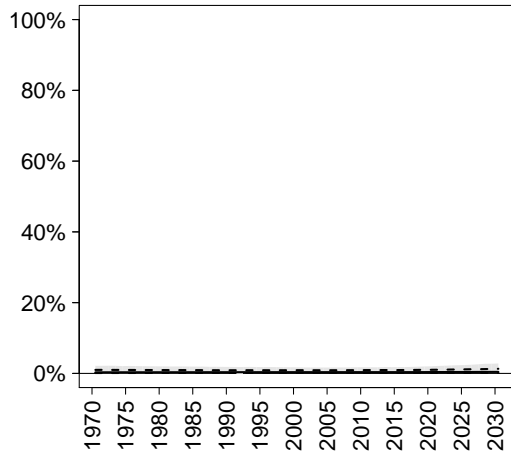

- DHS
- MICS
- Other international survey
- National survey
- PMA
- Subpopulation
- +: Higher contraceptive use
- : Lower contraceptive use
- A: Other age group
- F: Folk methods included
- S-: Sterilization included
- S+: Sterilization excluded
- Unmarried women
- ▽ Formerly married
- ▣ Partnered women

Thailand (South-eastern Asia, SA Group 1) --- Unmarried / Not In-Union

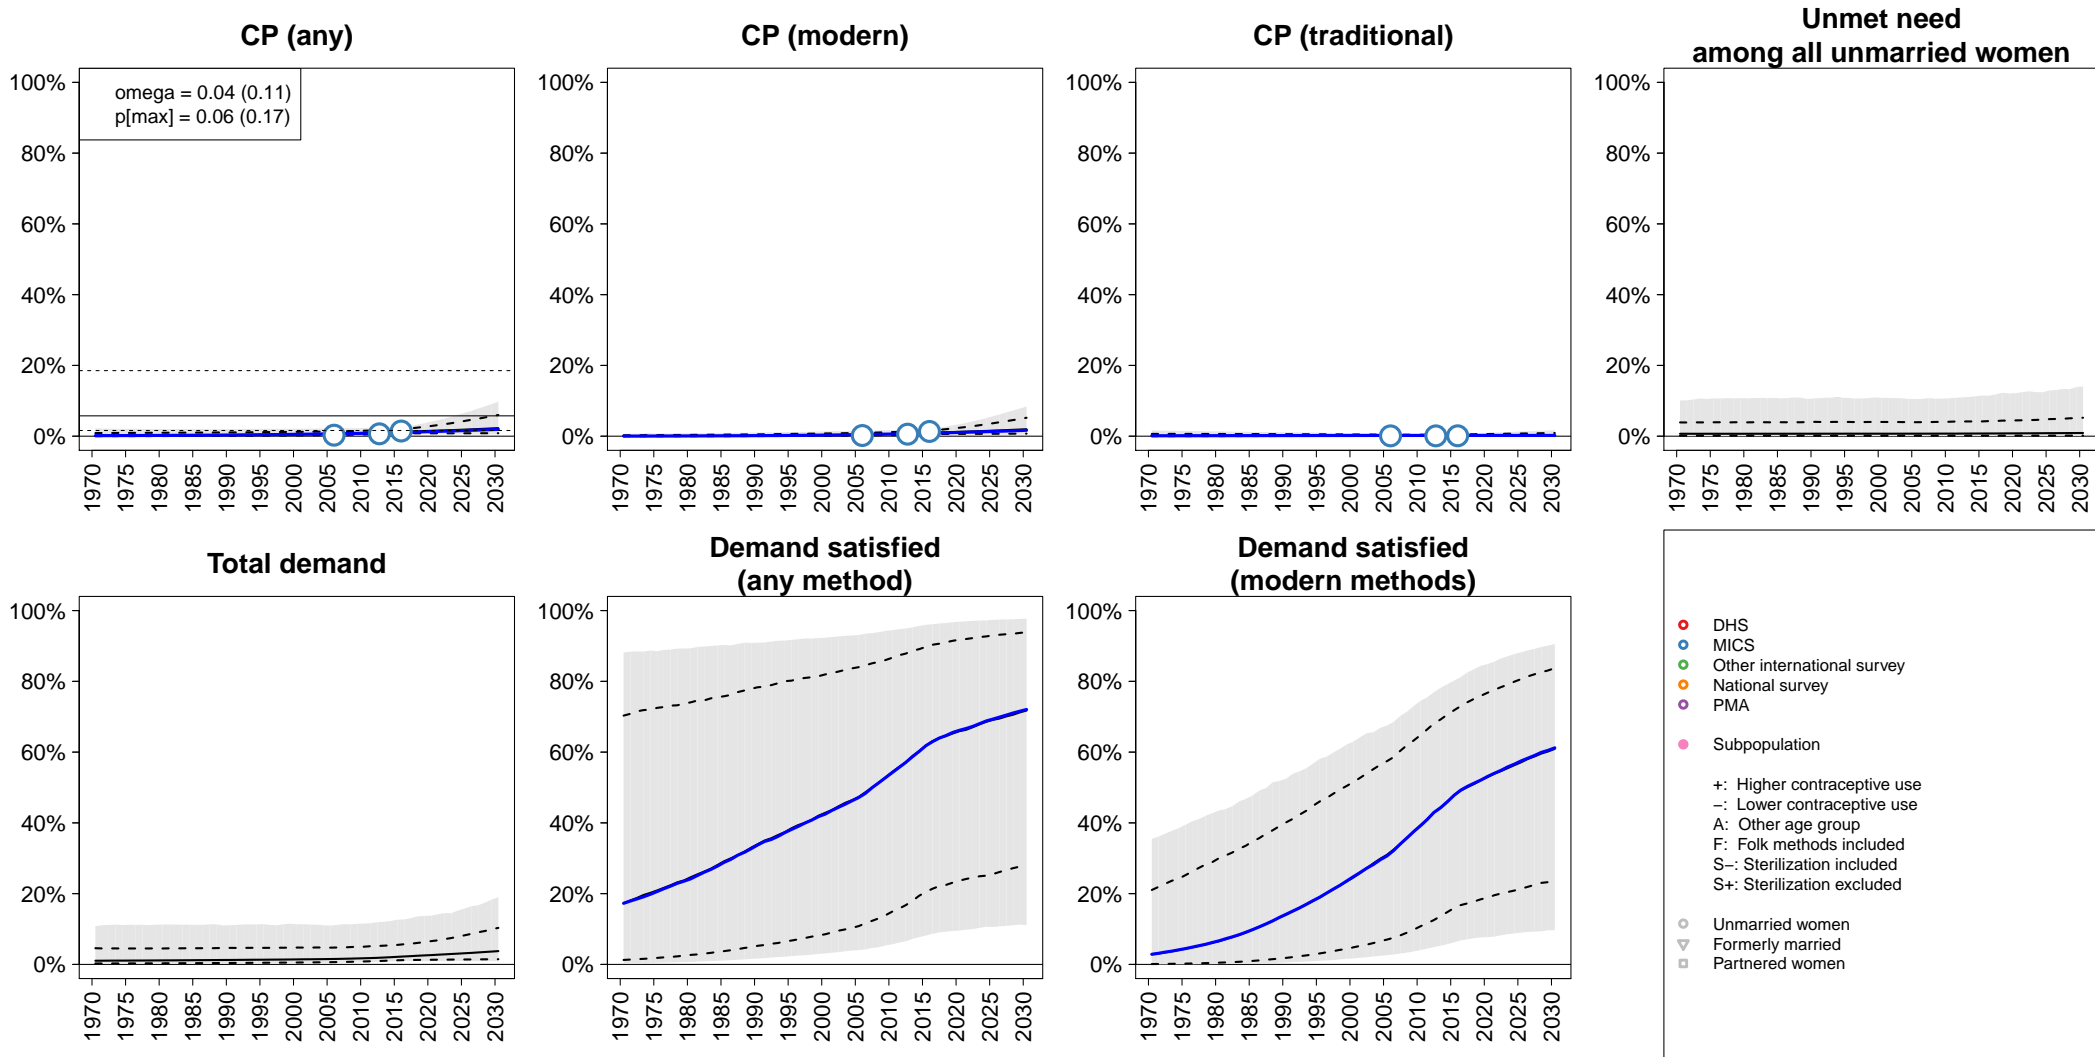

Togo (Western Africa, SA Group 1) --- Unmarried / Not In-Union

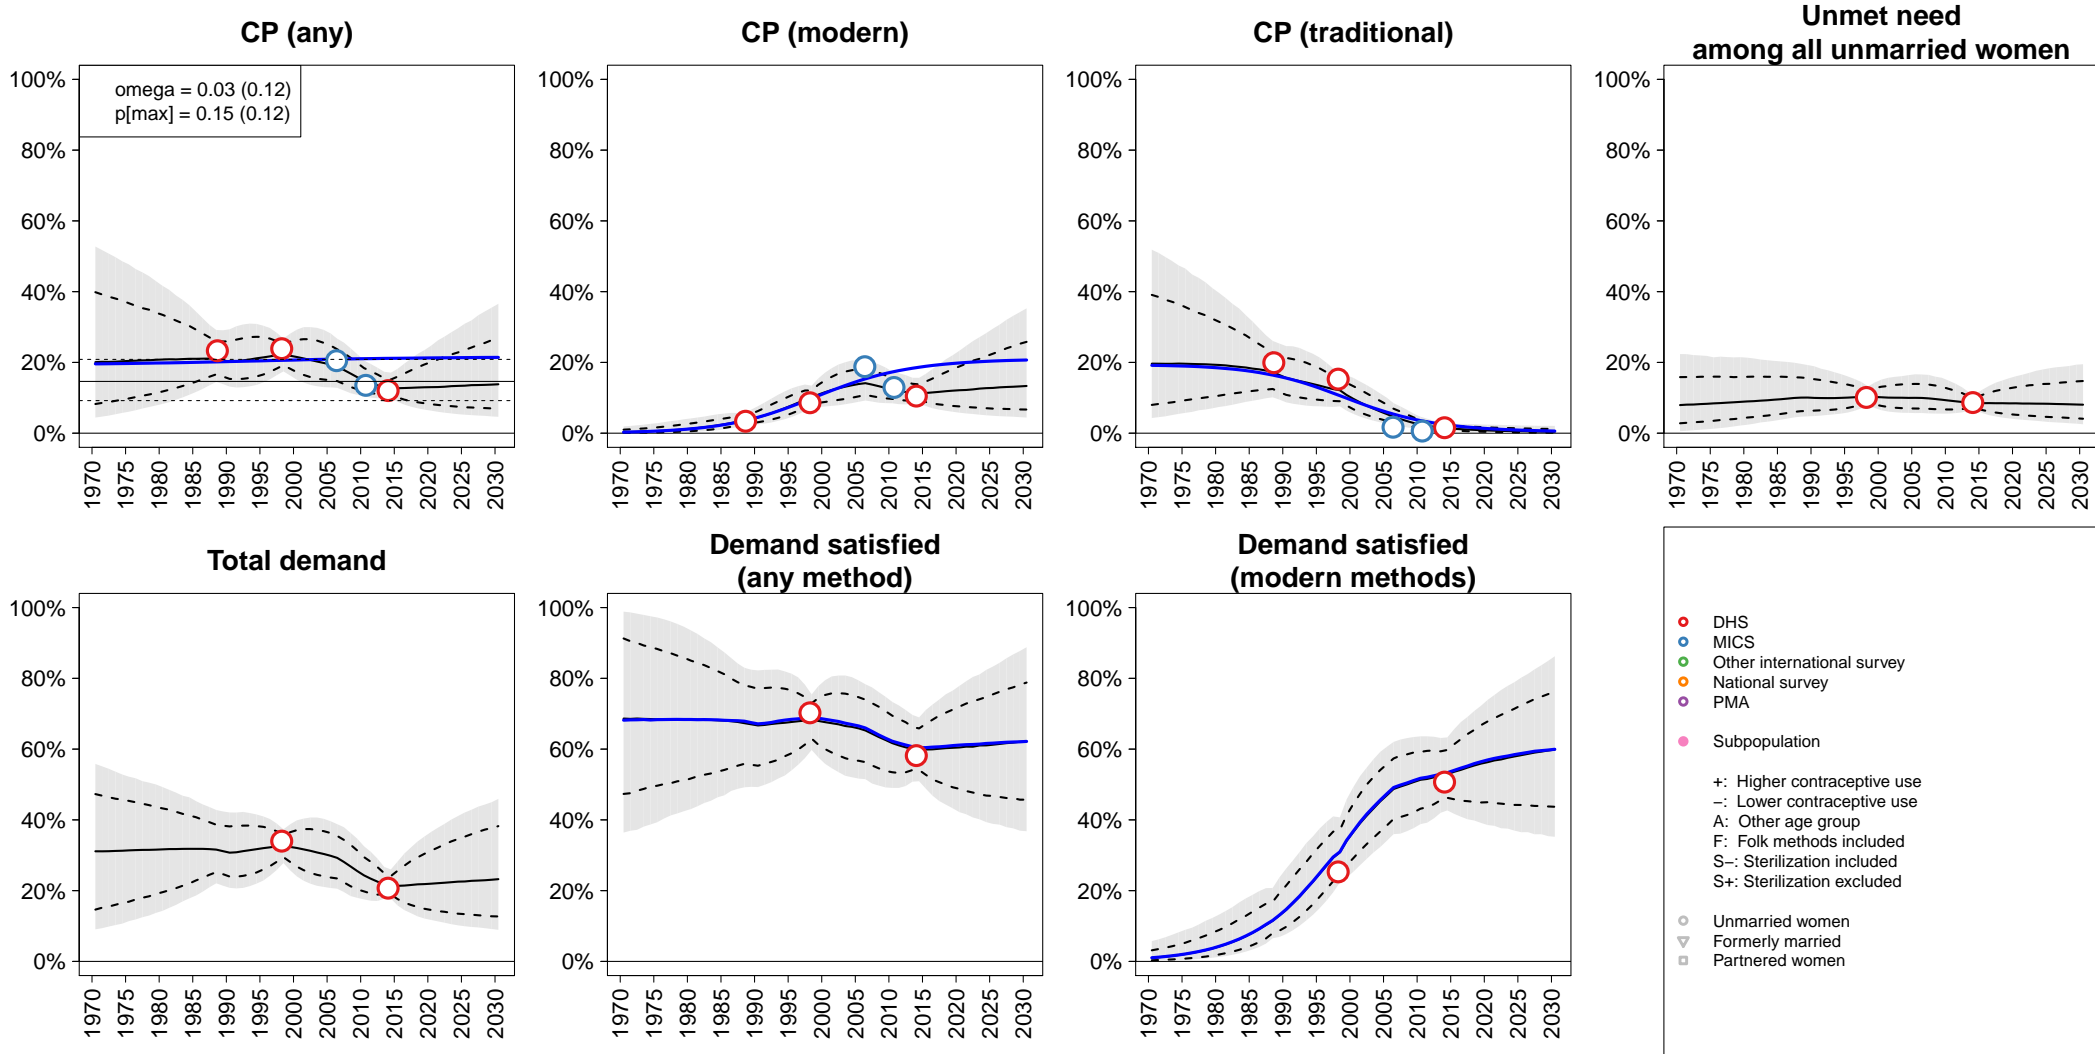

Trinidad and Tobago (Caribbean, SA Group 1) --- Unmarried / Not In-Union

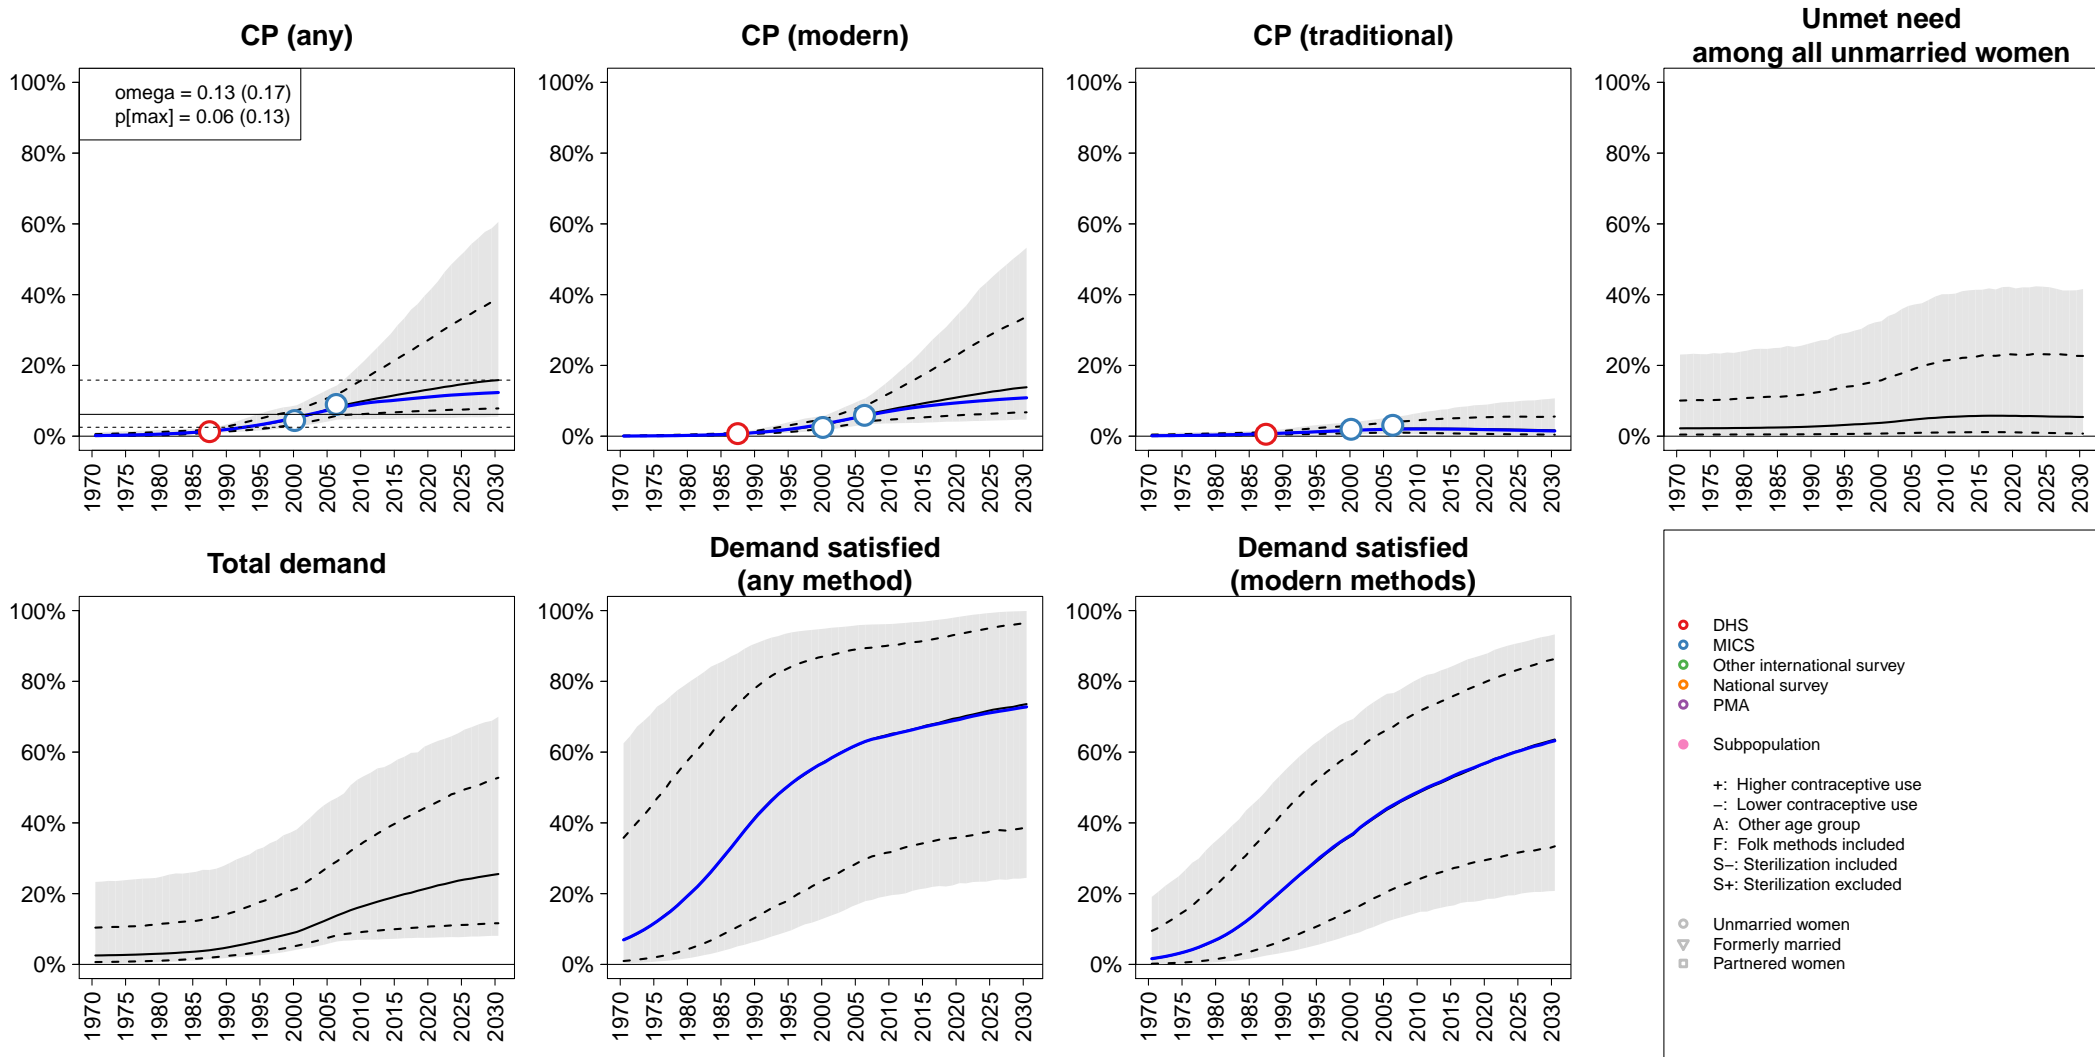

Uganda (Eastern Africa, SA Group 1) --- Unmarried / Not In-Union

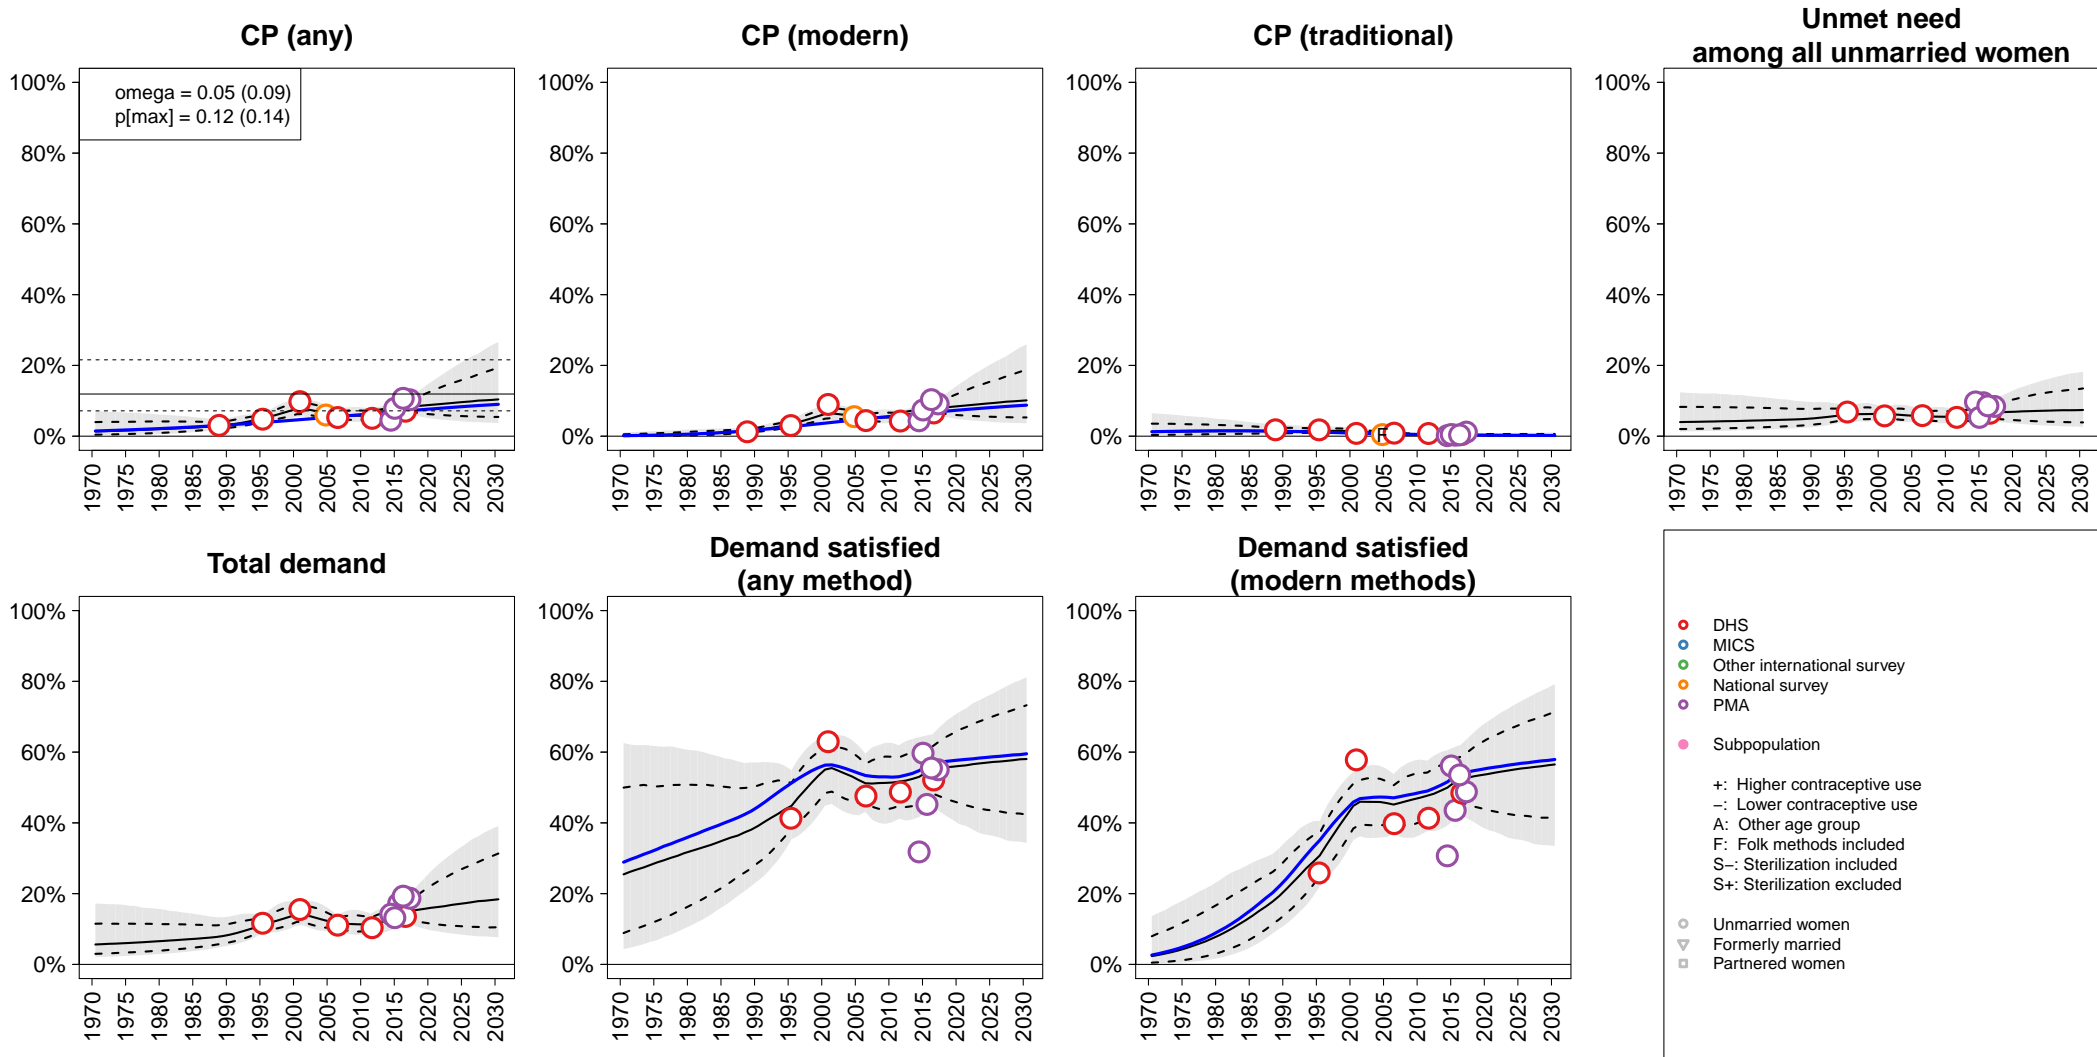

Ukraine (Eastern Europe, SA Group 1) --- Unmarried / Not In-Union

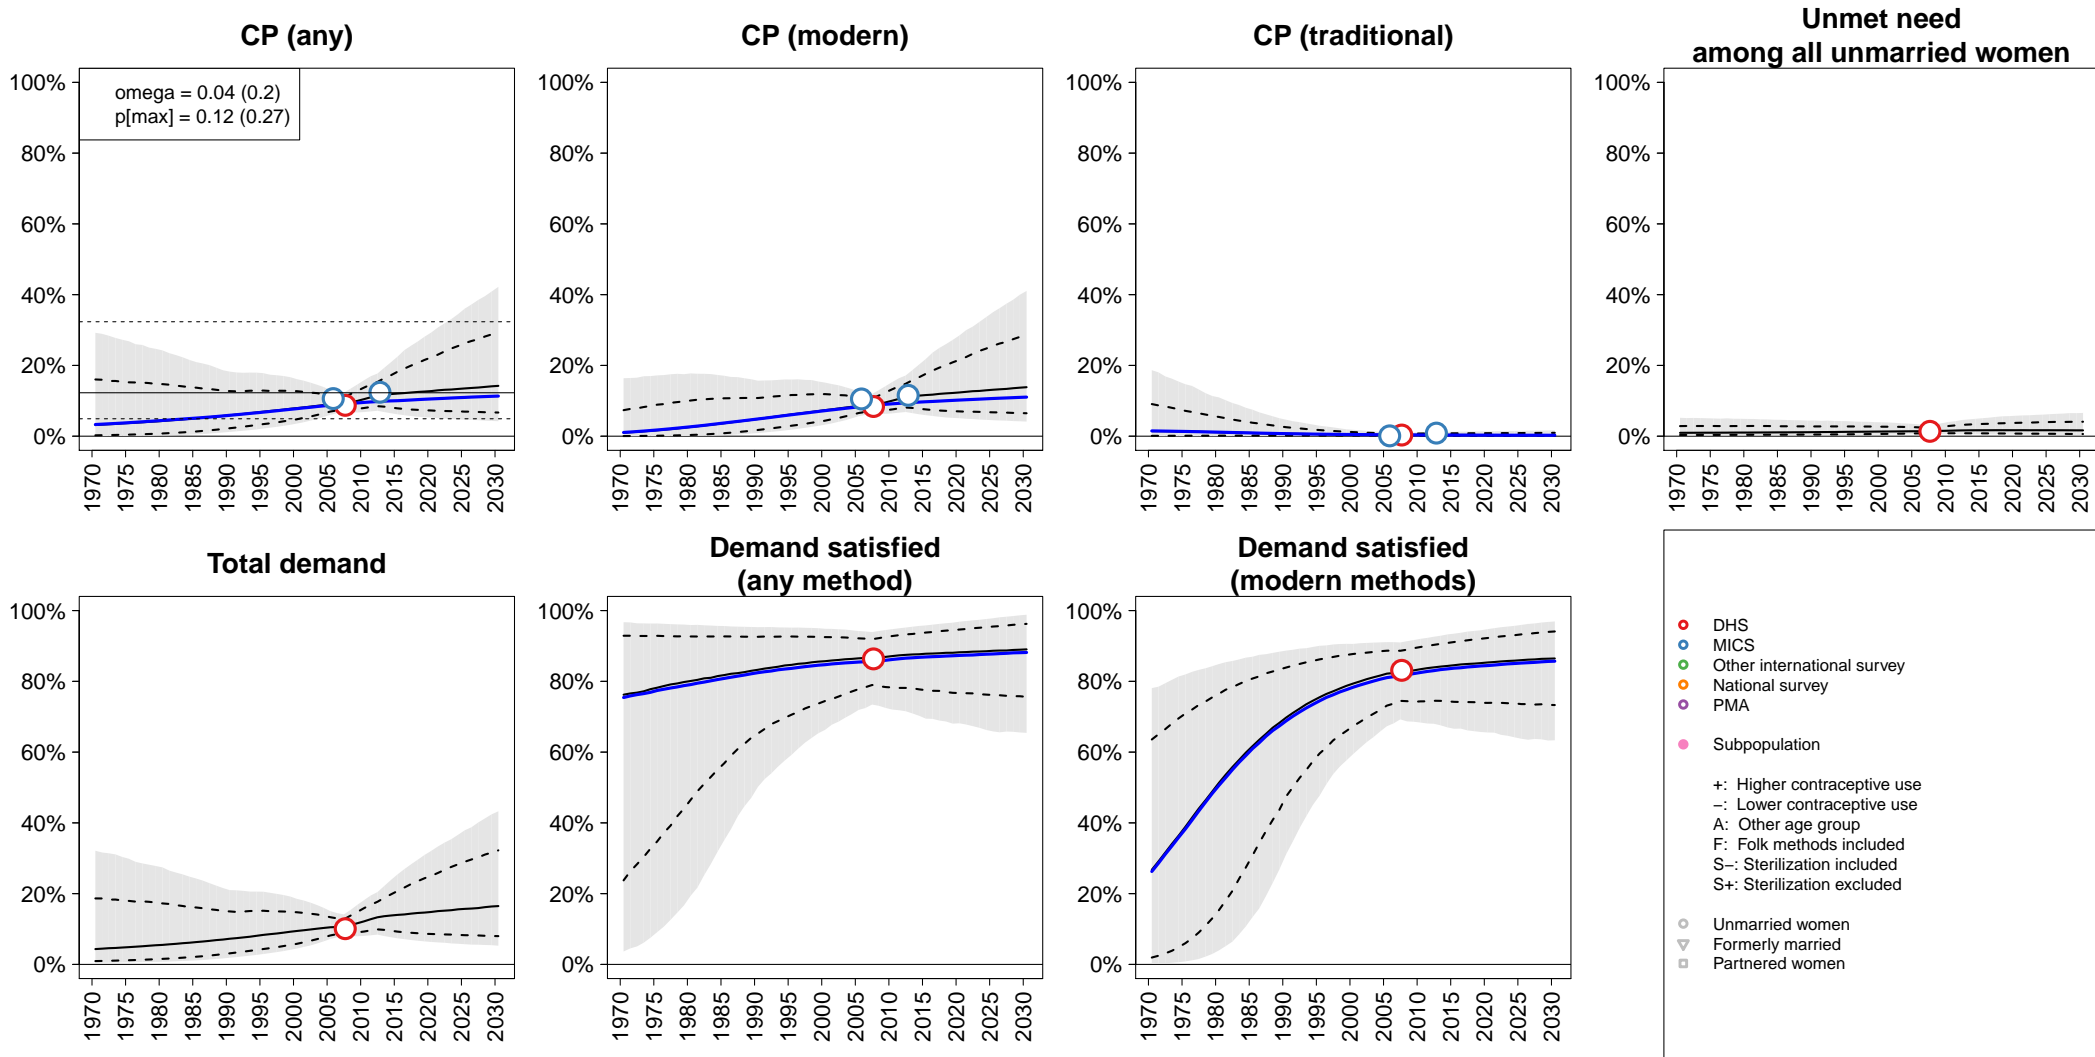

United Rep. of Tanzania (Eastern Africa, SA Group 1) --- Unmarried / Not In-Union

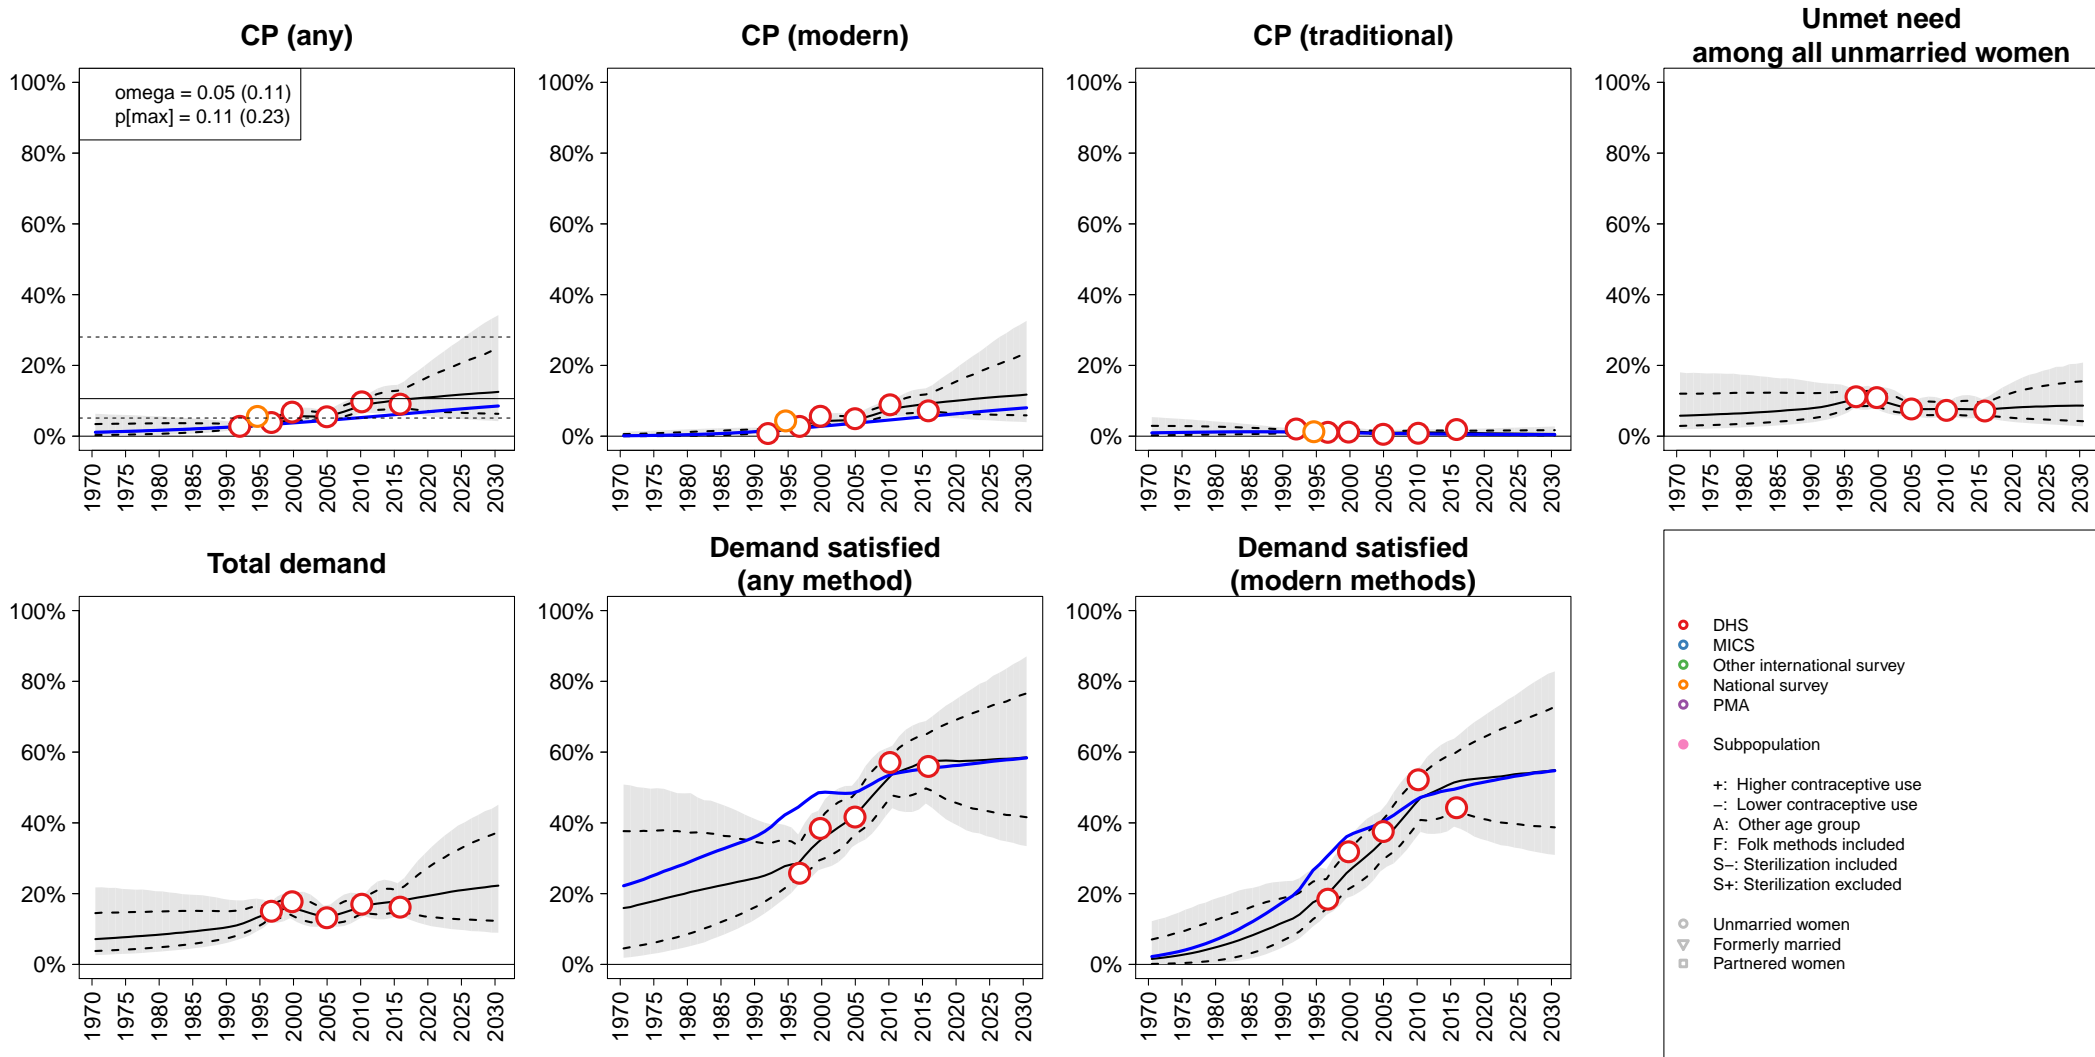

United States of America (Northern America, SA Group 1) --- Unmarried / Not In-Union

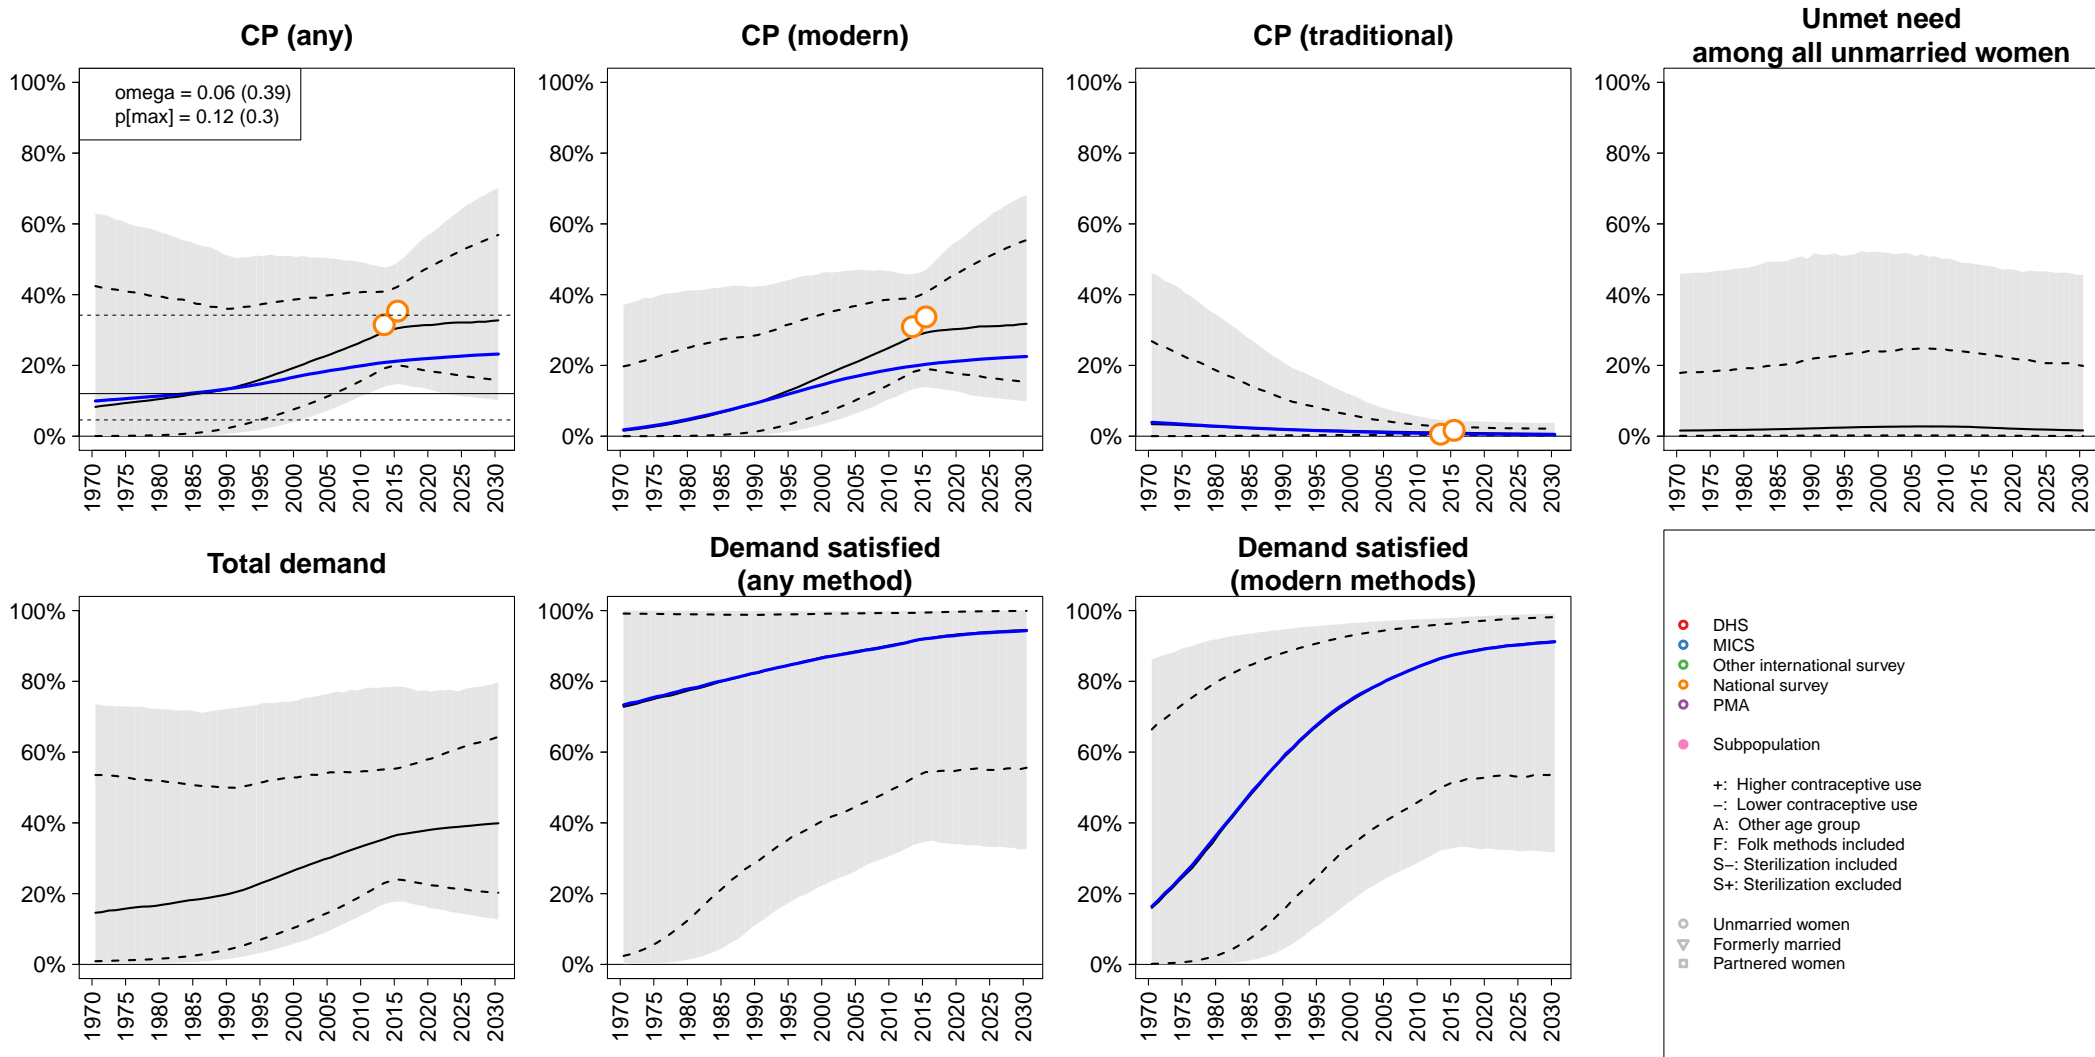



Uzbekistan (Central Asia, SA Group 0) --- Unmarried / Not In-Union

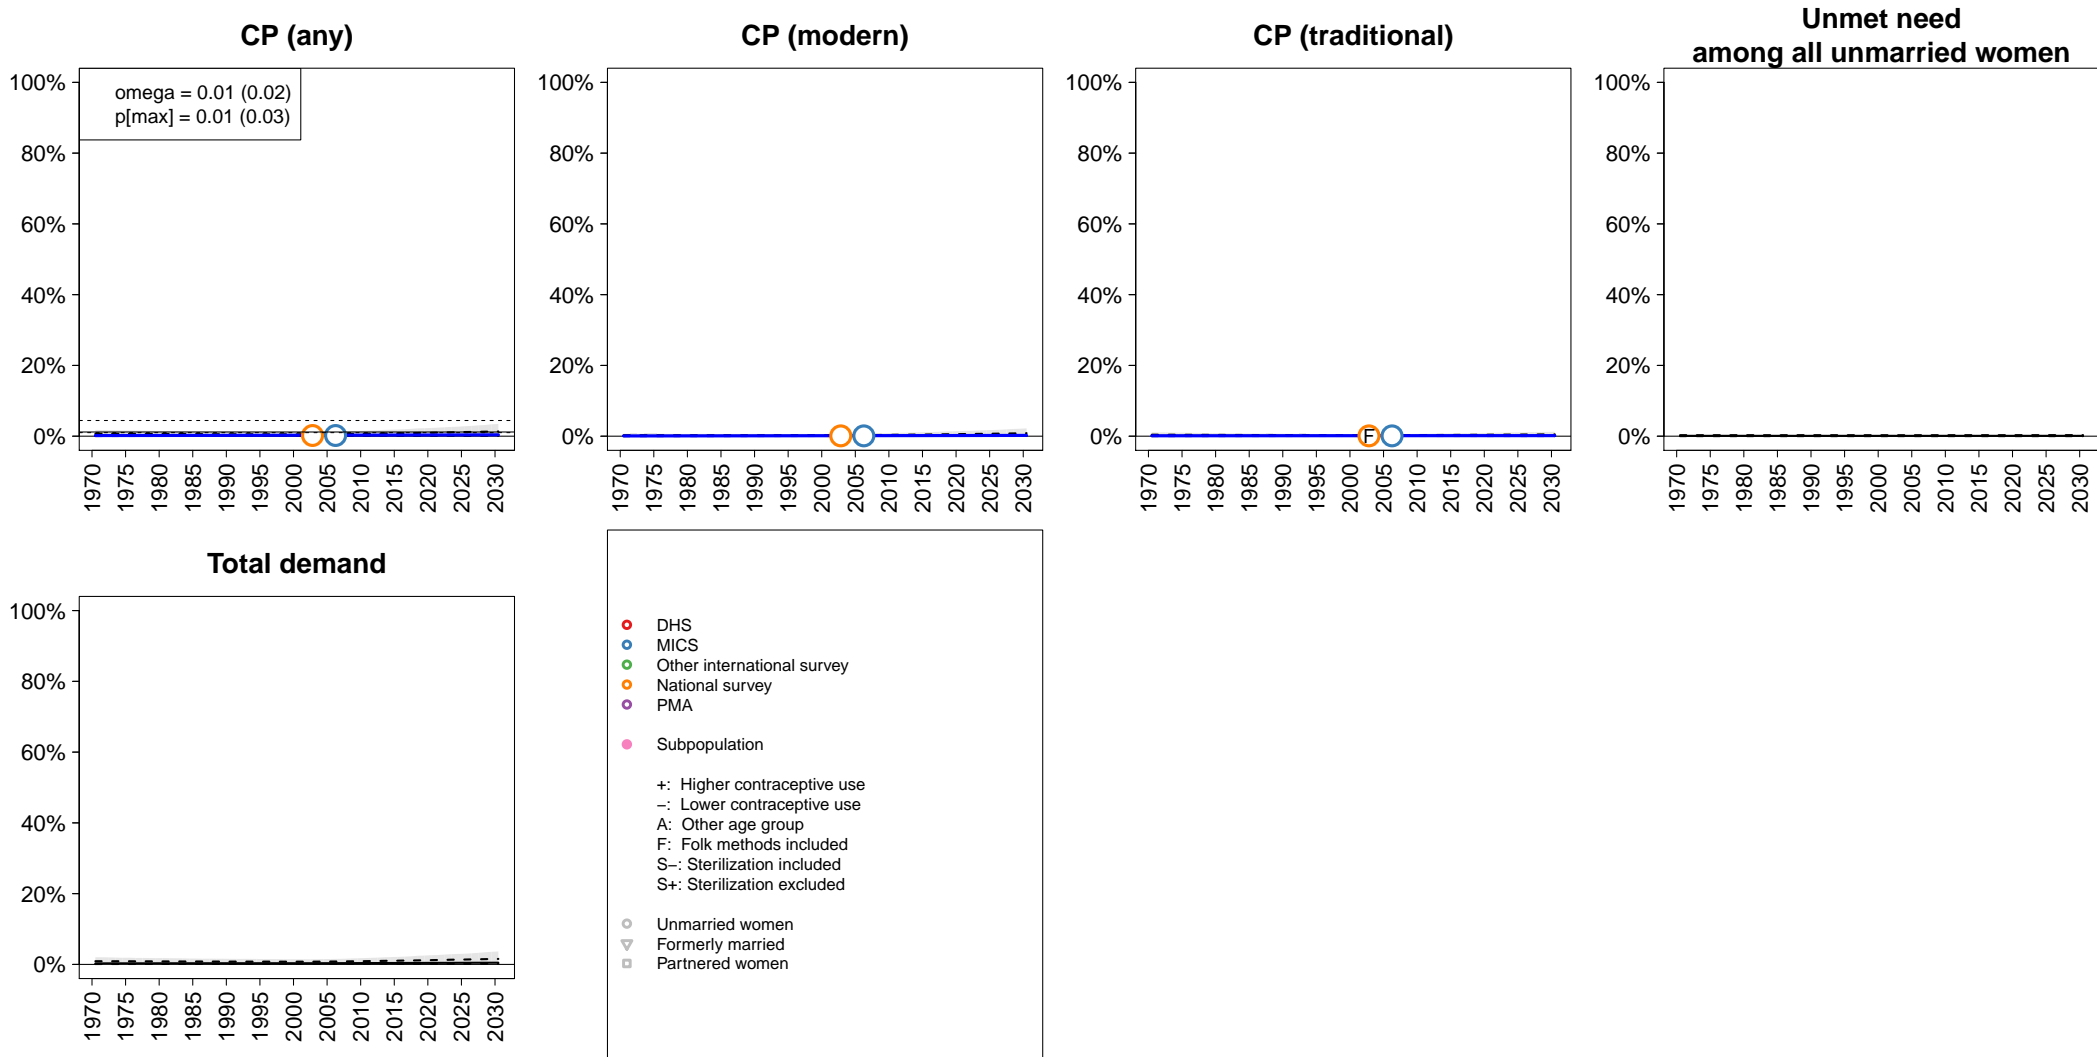

Vanuatu (Melanesia, SA Group 1) --- Unmarried / Not In-Union

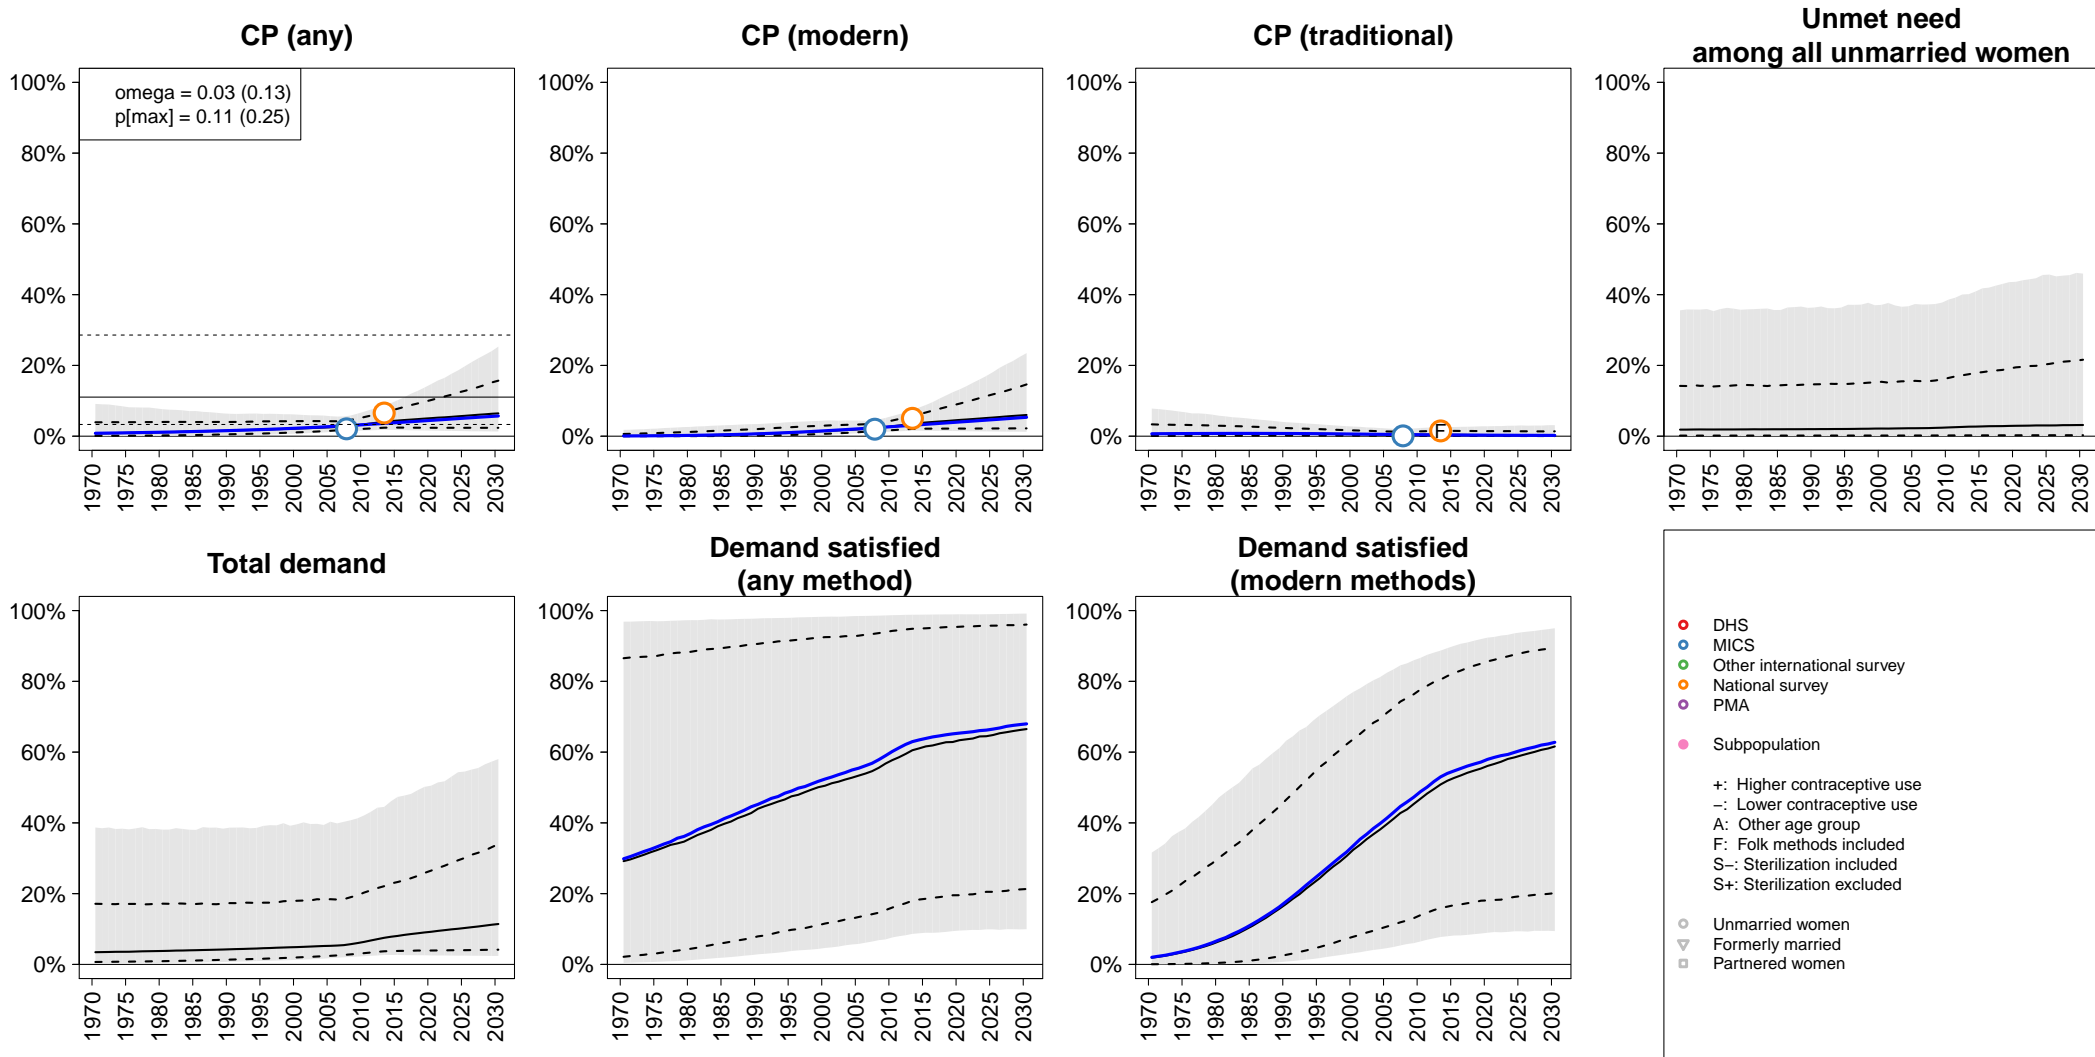

Viet Nam (South-eastern Asia, SA Group 0) --- Unmarried / Not In-Union

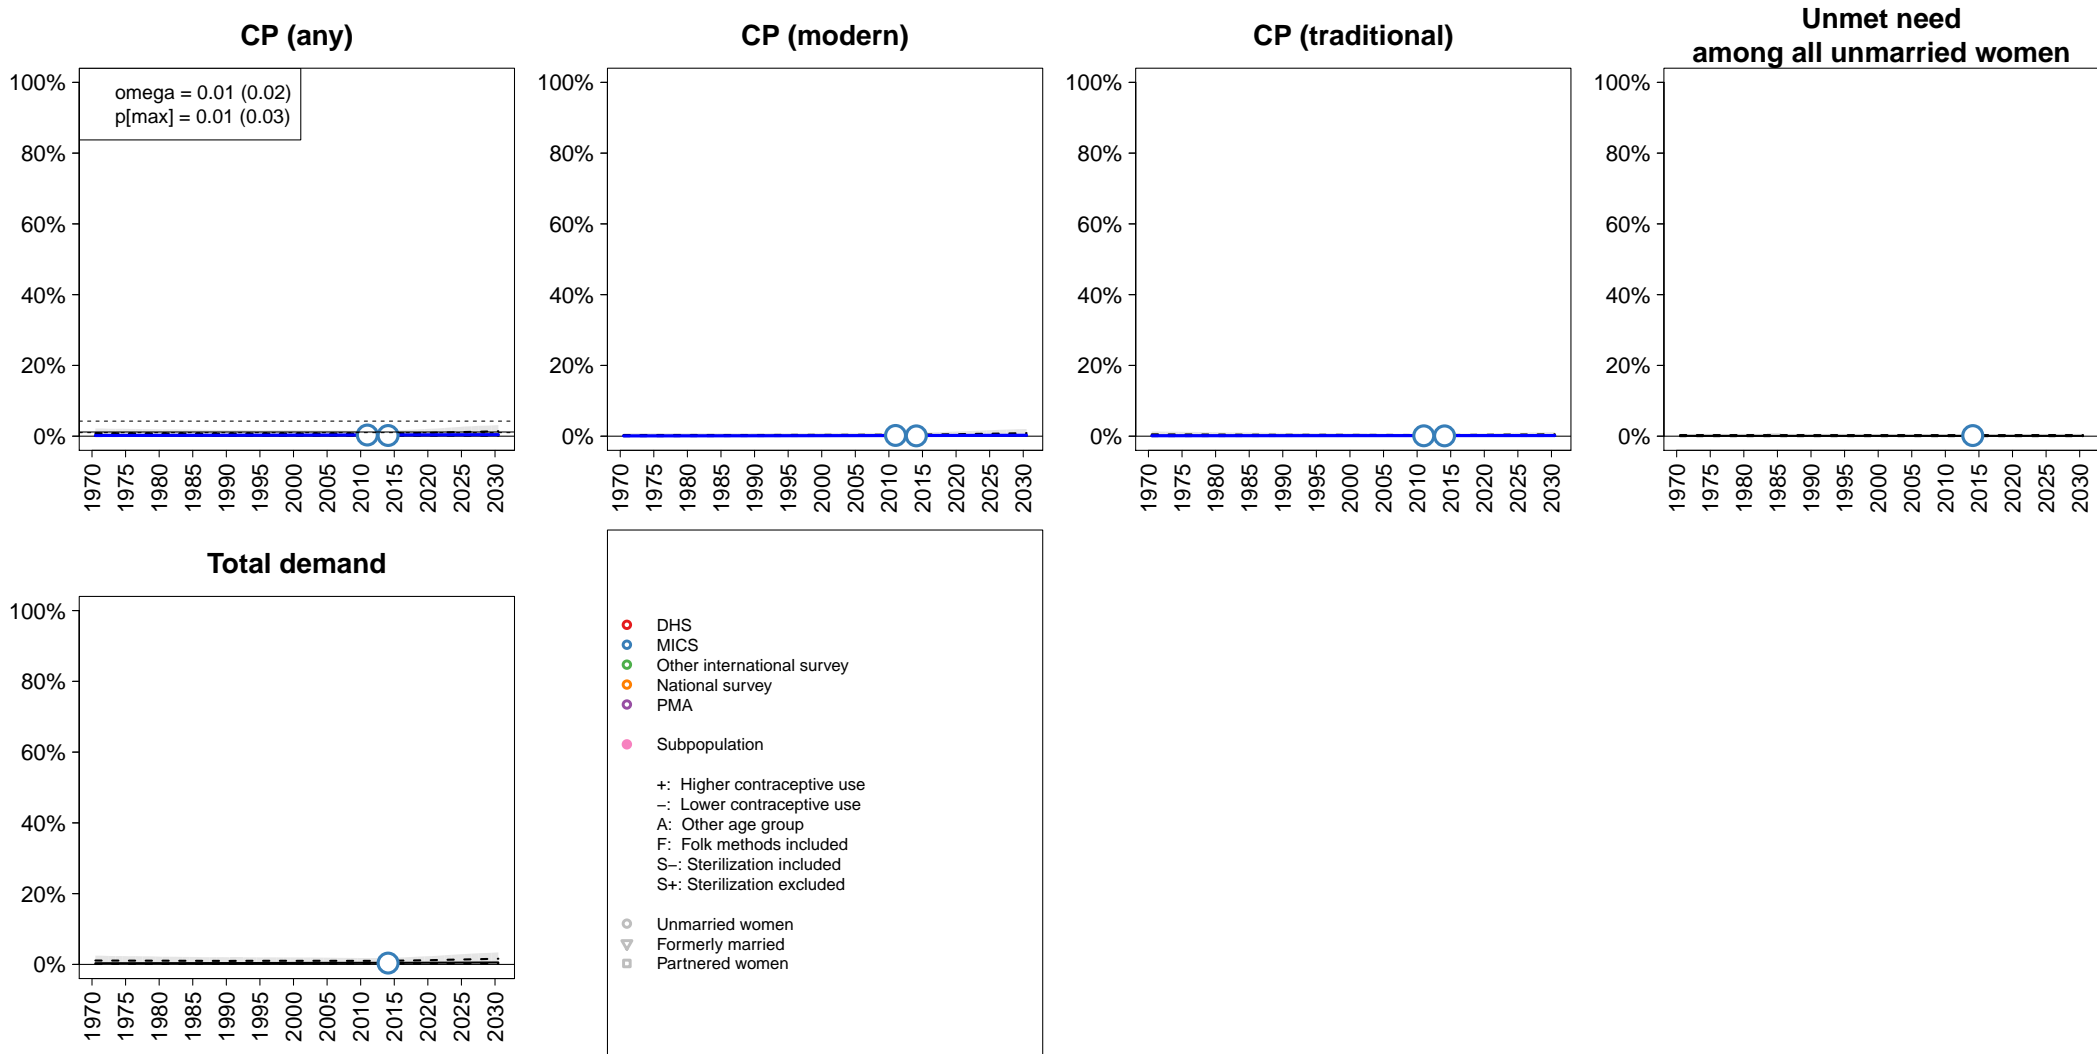

Zambia (Eastern Africa, SA Group 1) --- Unmarried / Not In-Union

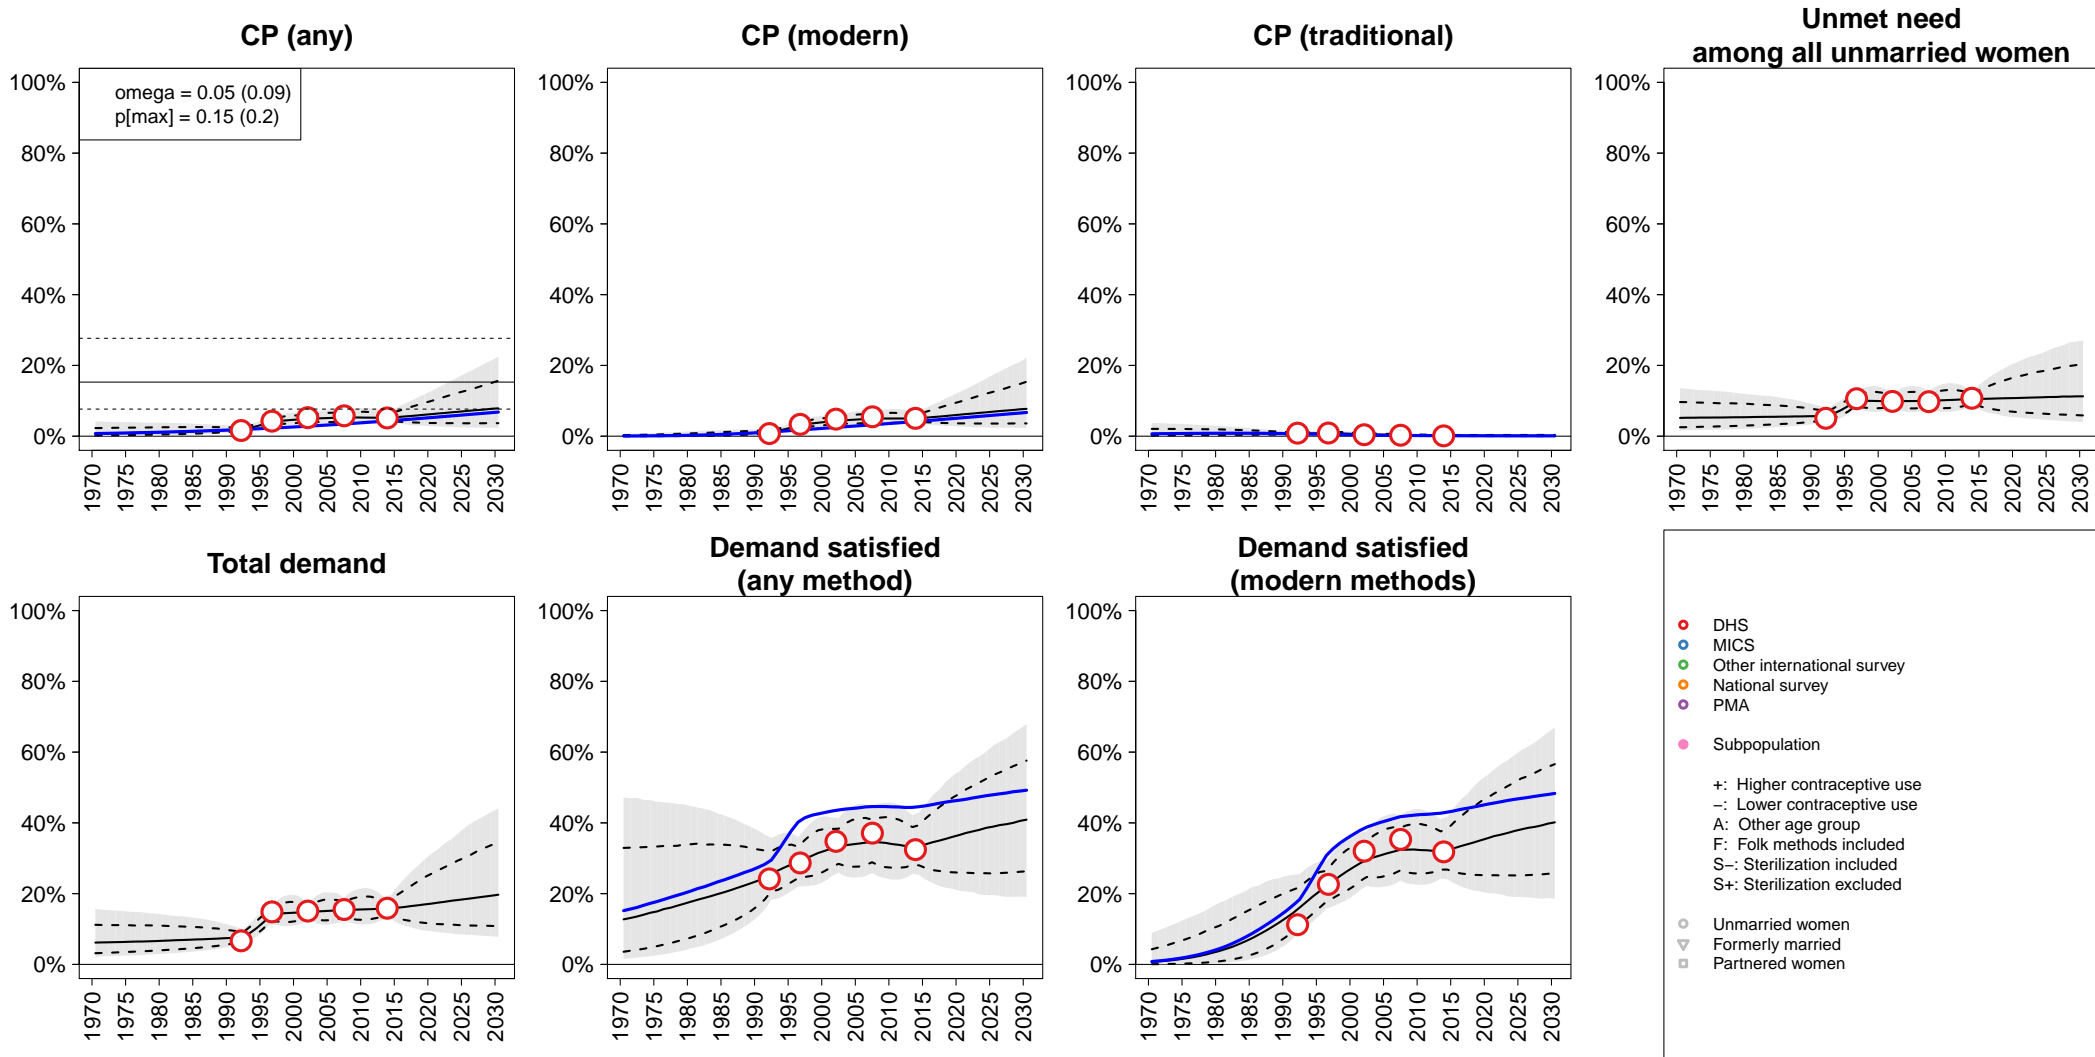

Zimbabwe (Eastern Africa, SA Group 1) --- Unmarried / Not In-Union

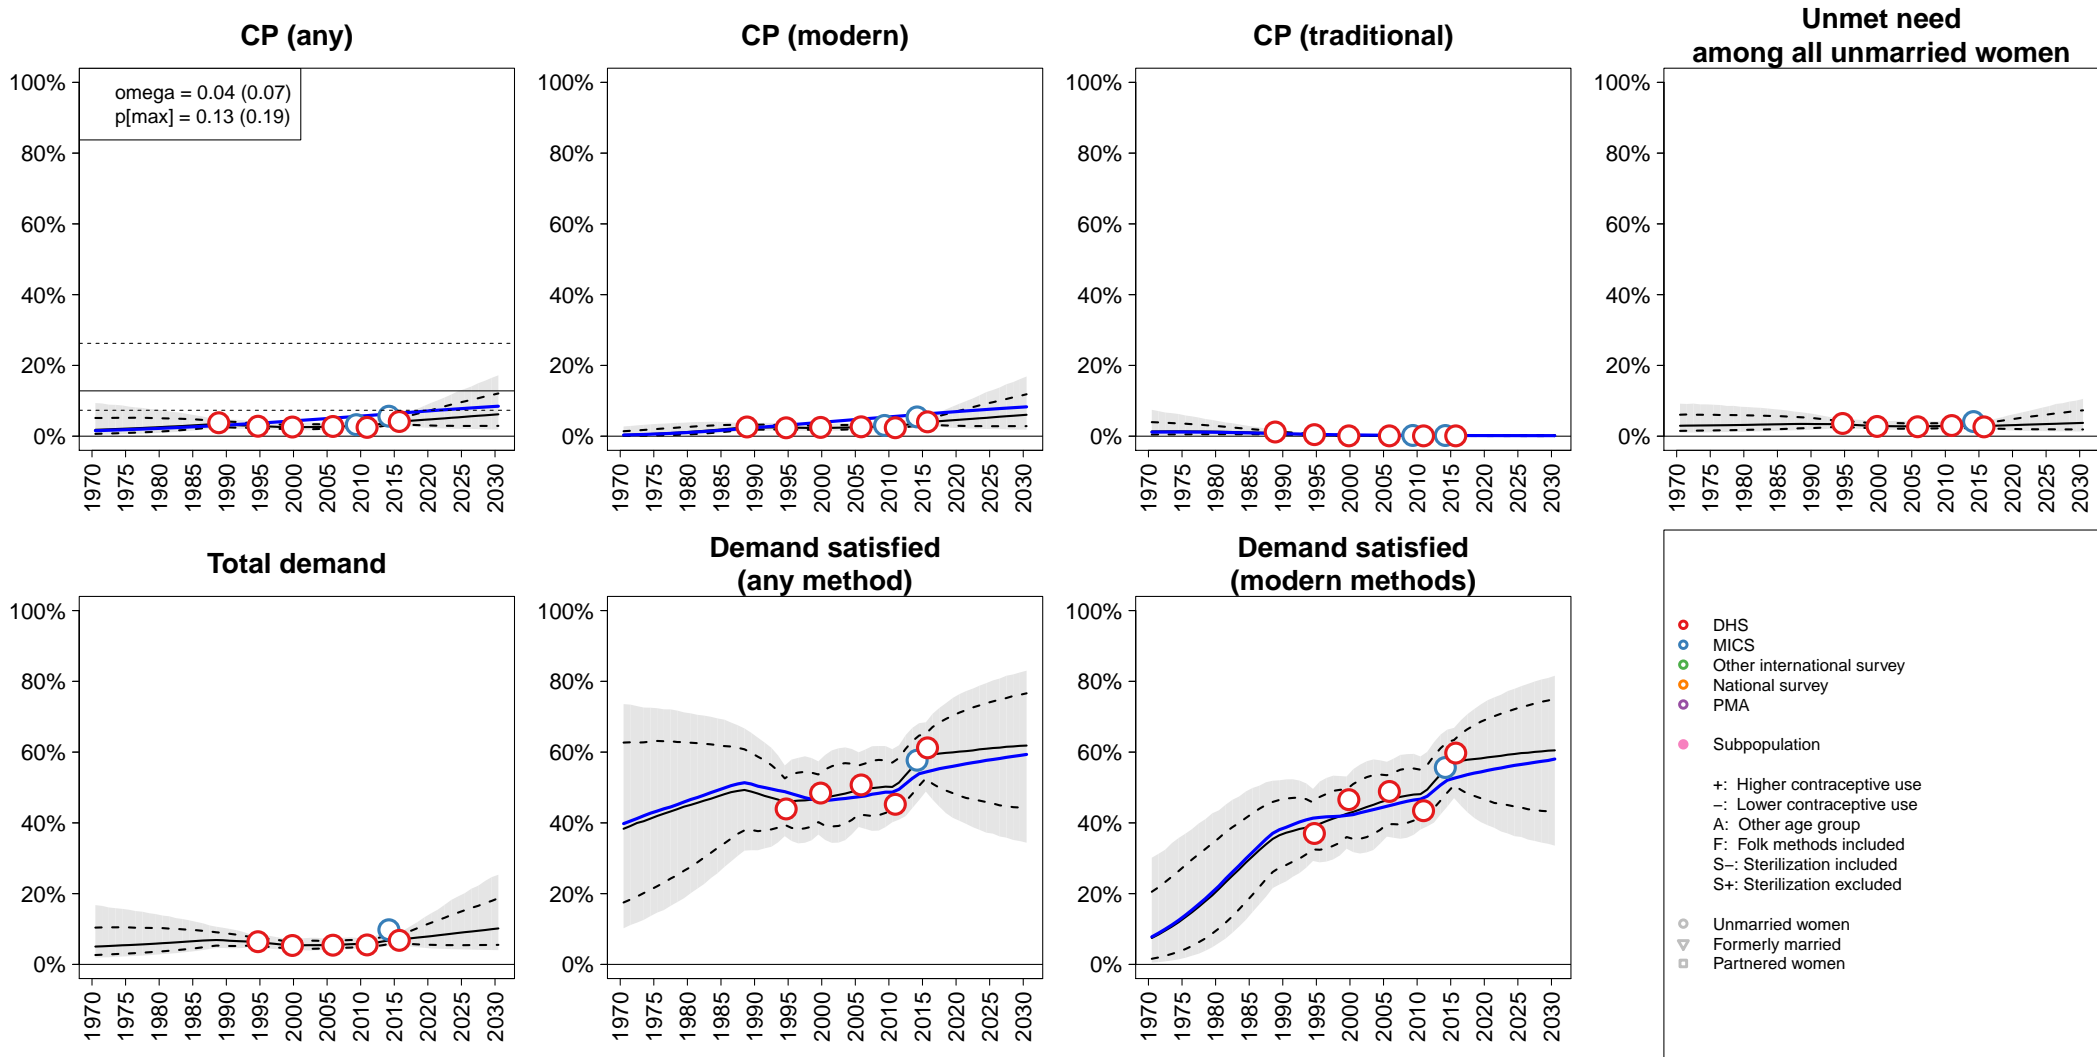

## 1.2 Married Adolescent Women

### Afghanistan (Southern Asia) --- Married / In-Union

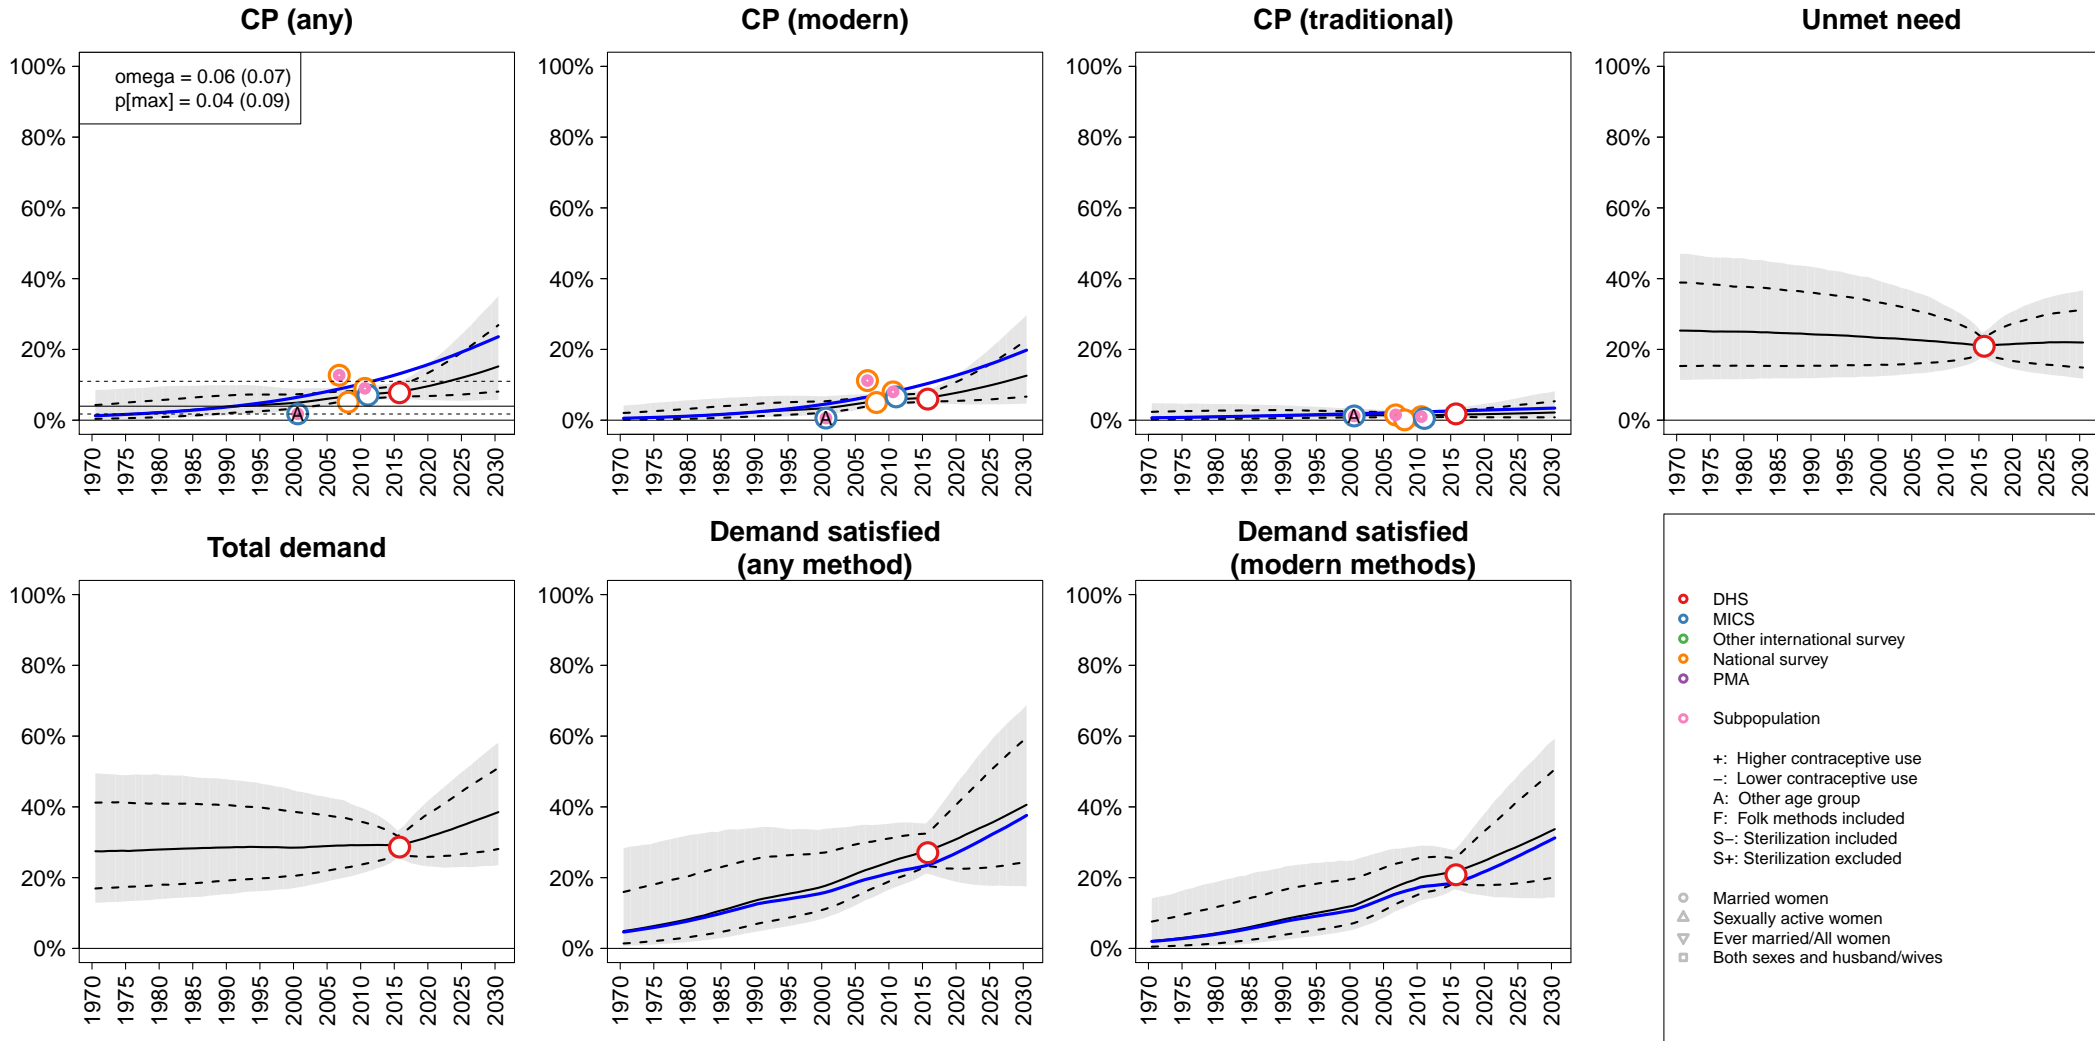

Albania (Southern Europe) --- Married / In-Union

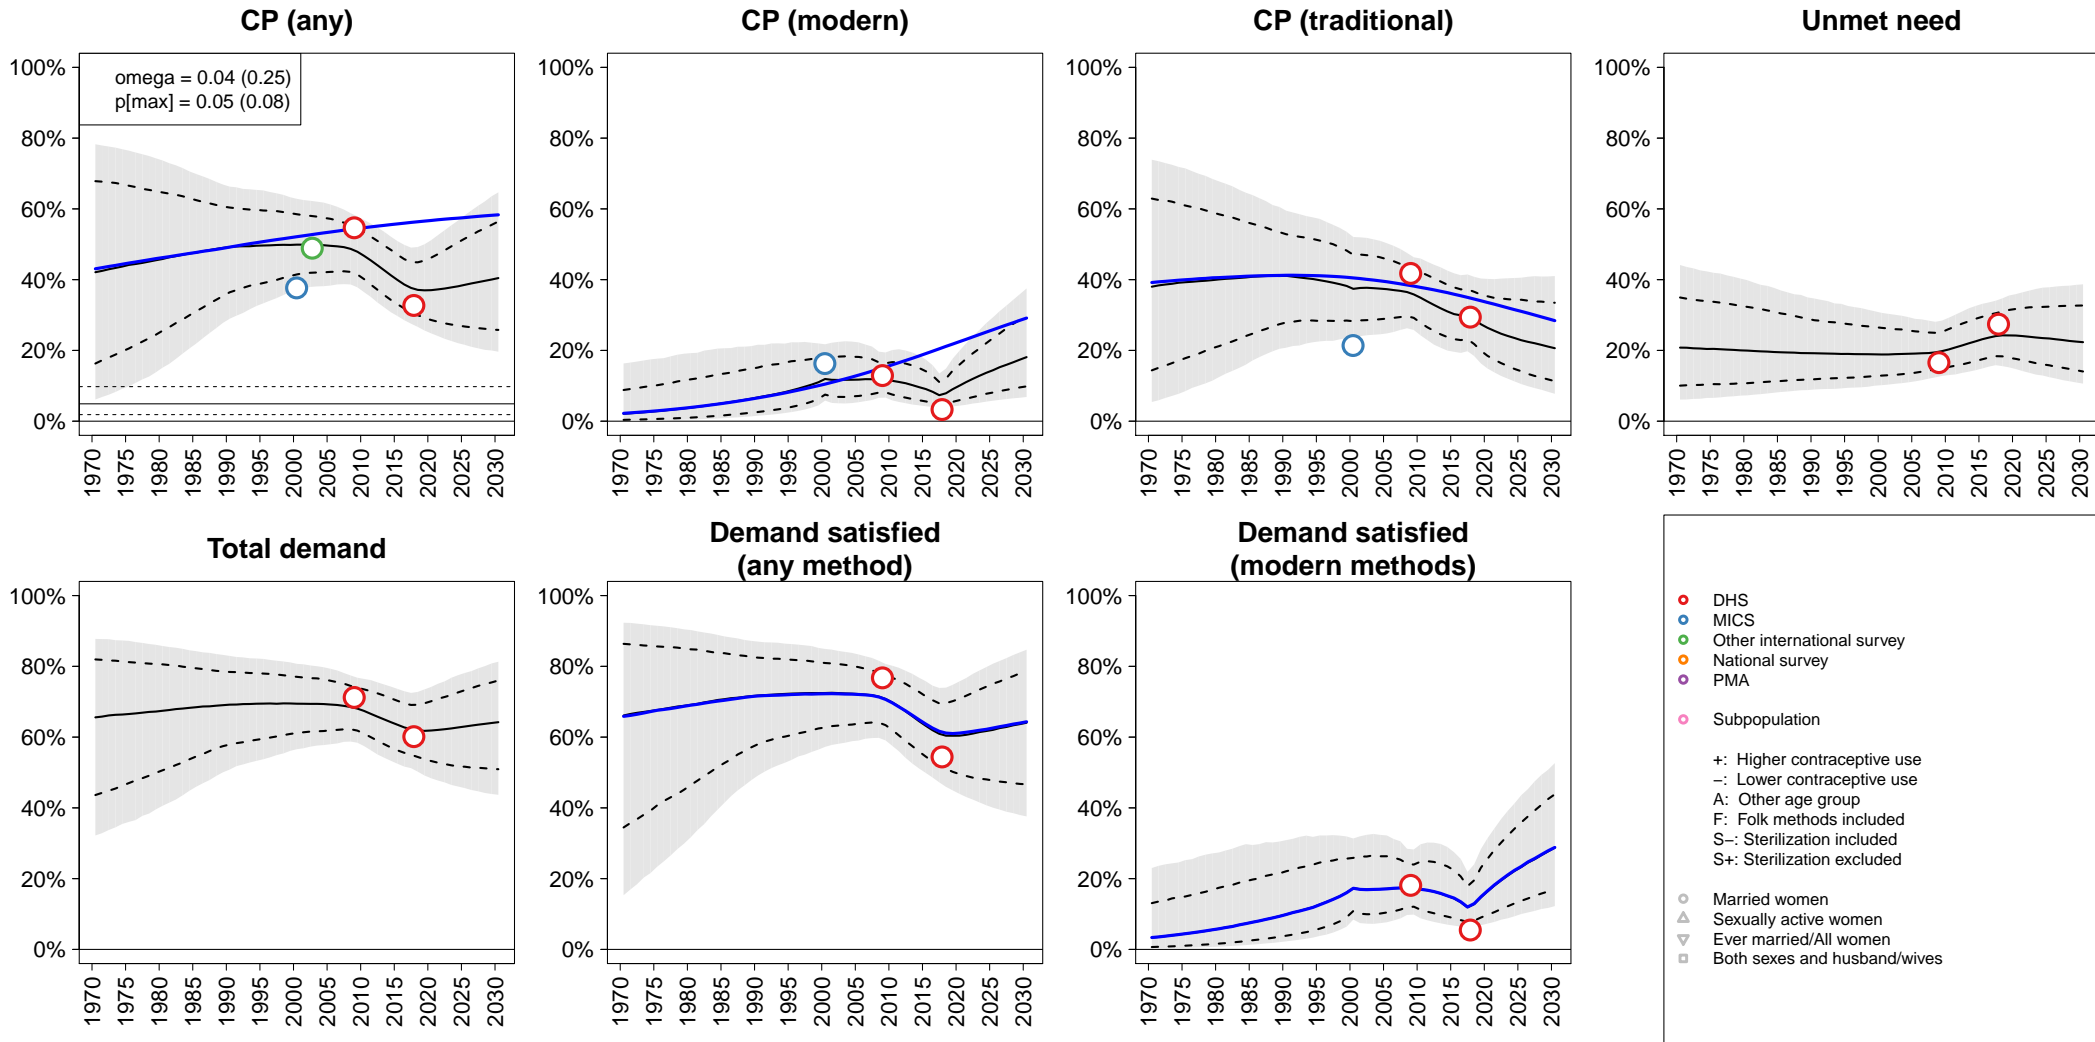



Algeria (Northern Africa) --- Married / In-Union

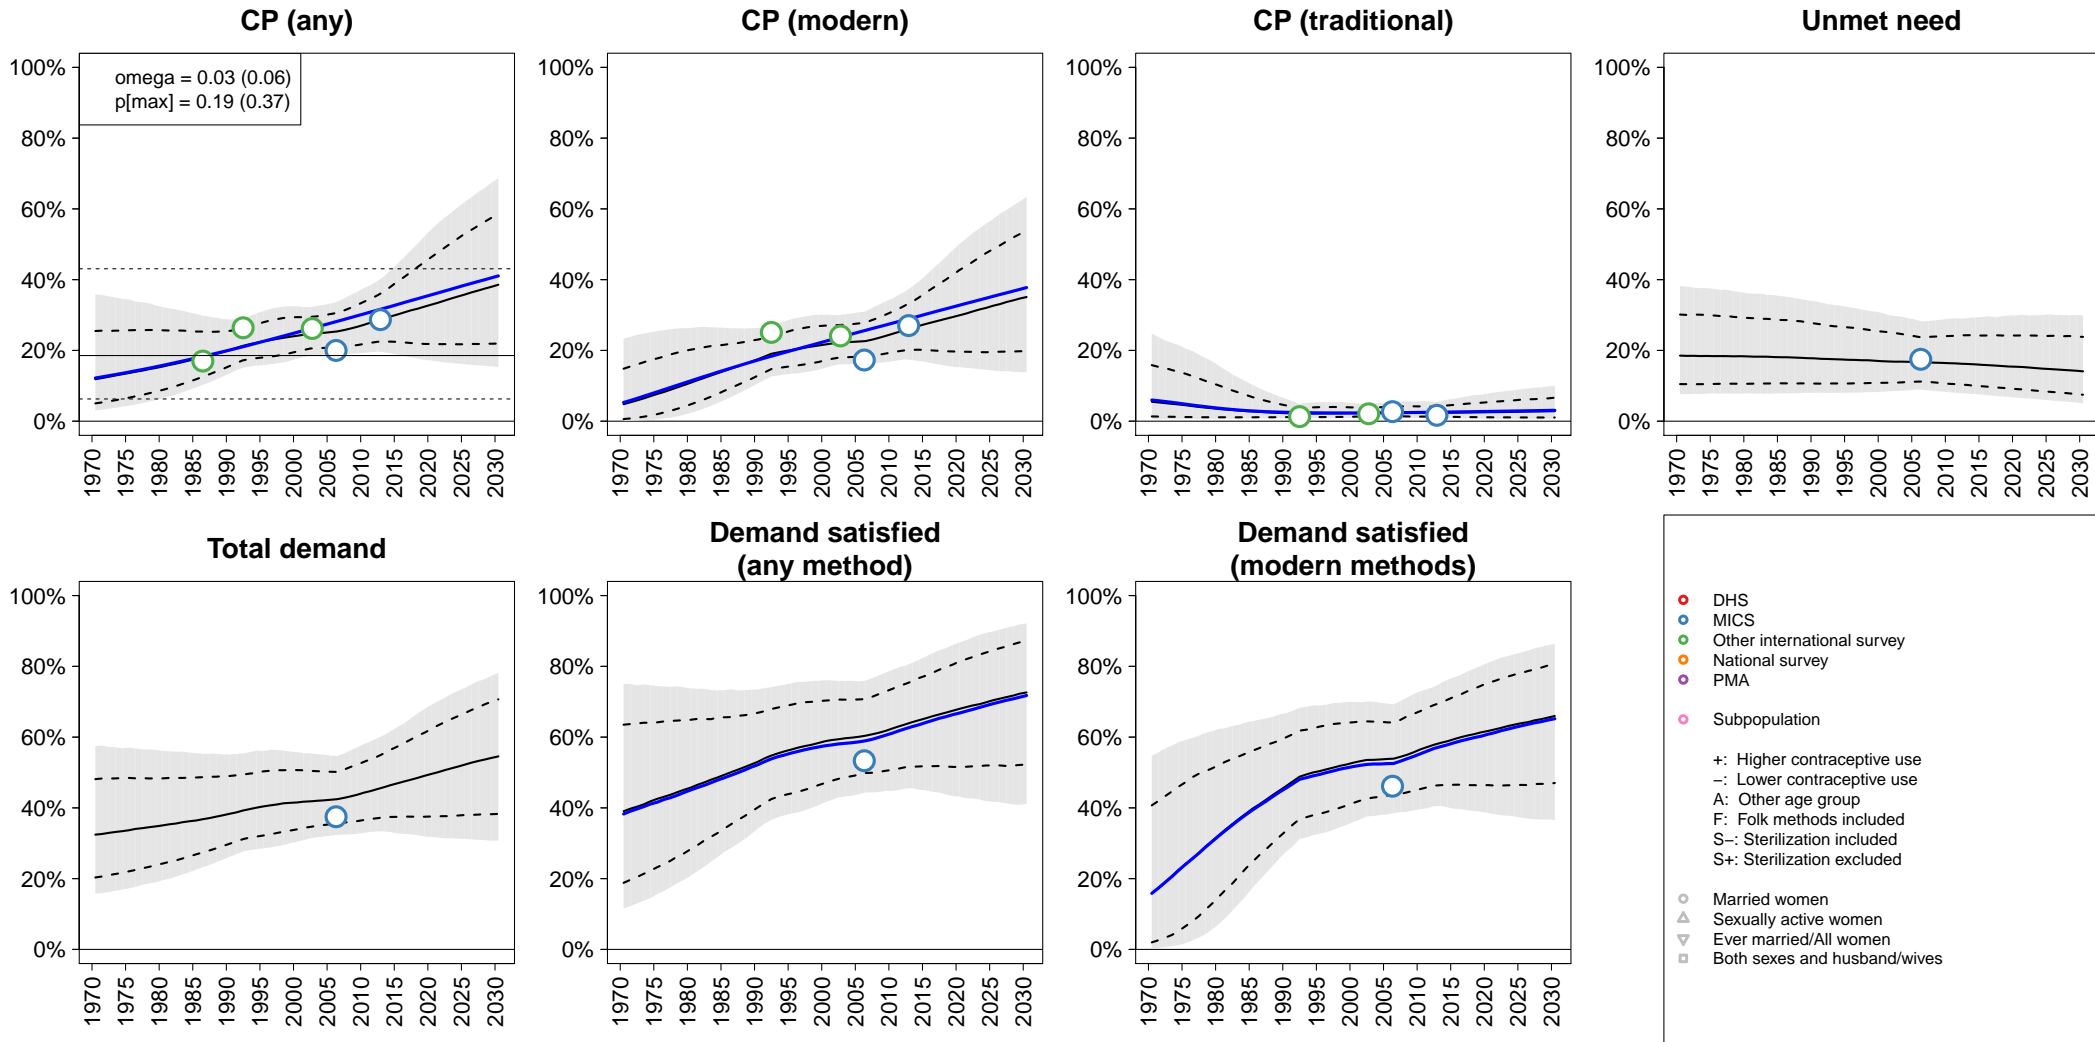

### Angola (Middle Africa) --- Married / In-Union

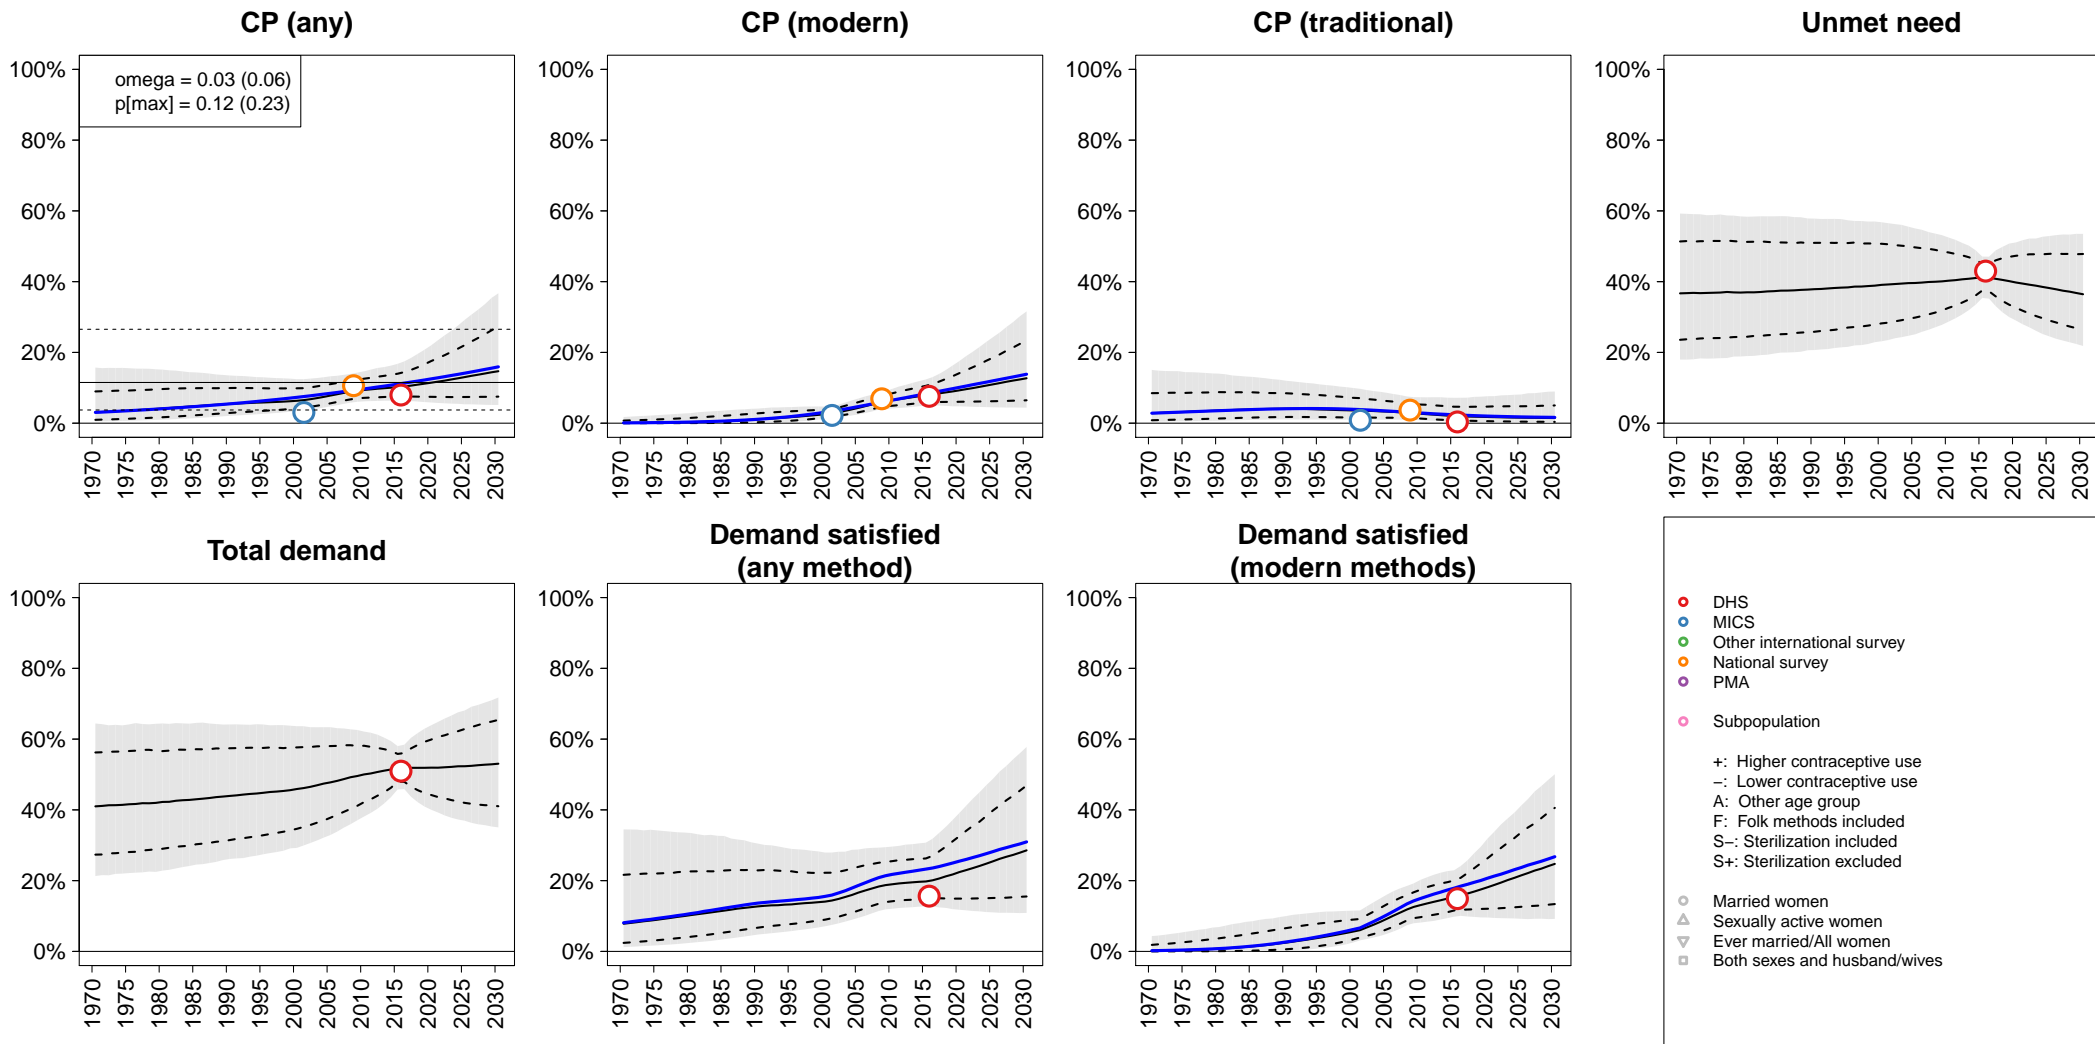

Antigua and Barbuda (Caribbean) --- Married / In-Union

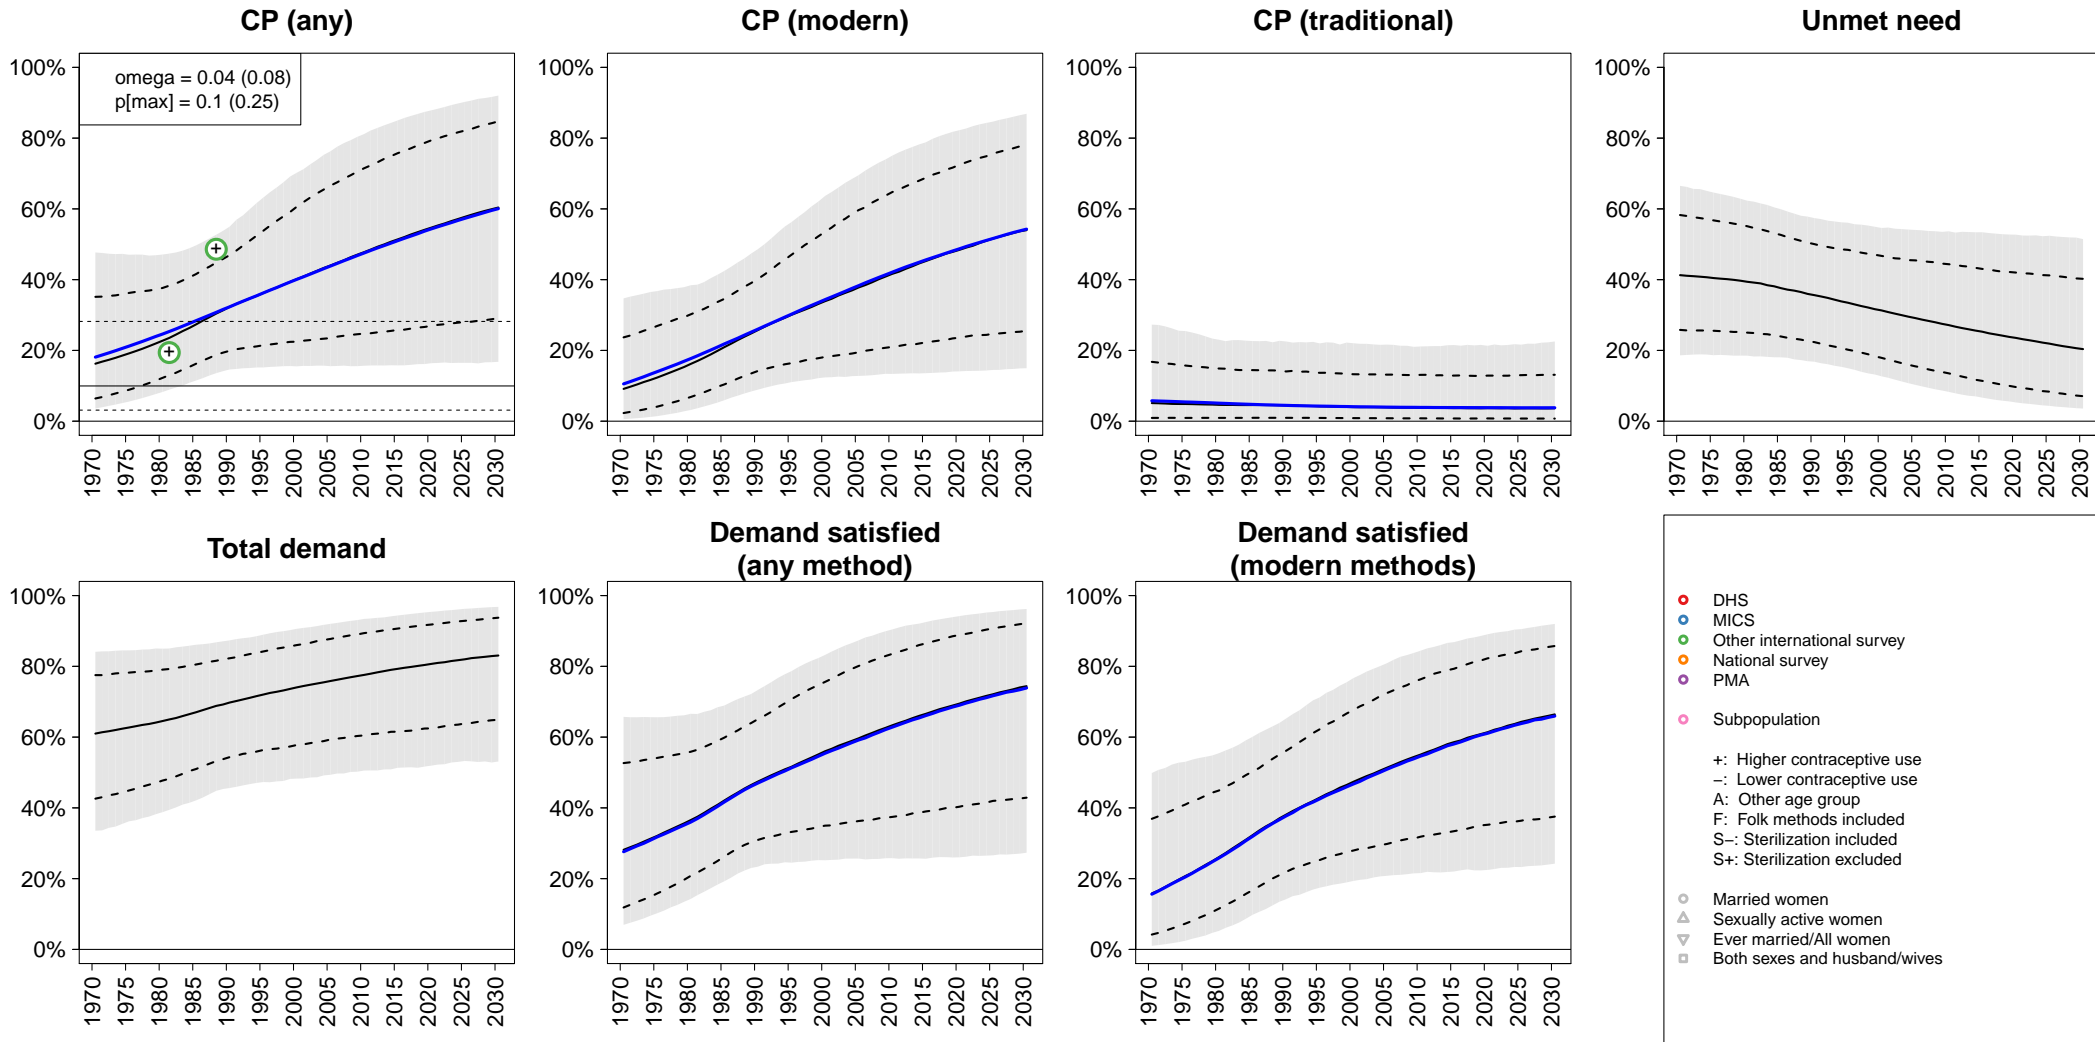

Armenia (Western Asia) --- Married / In-Union

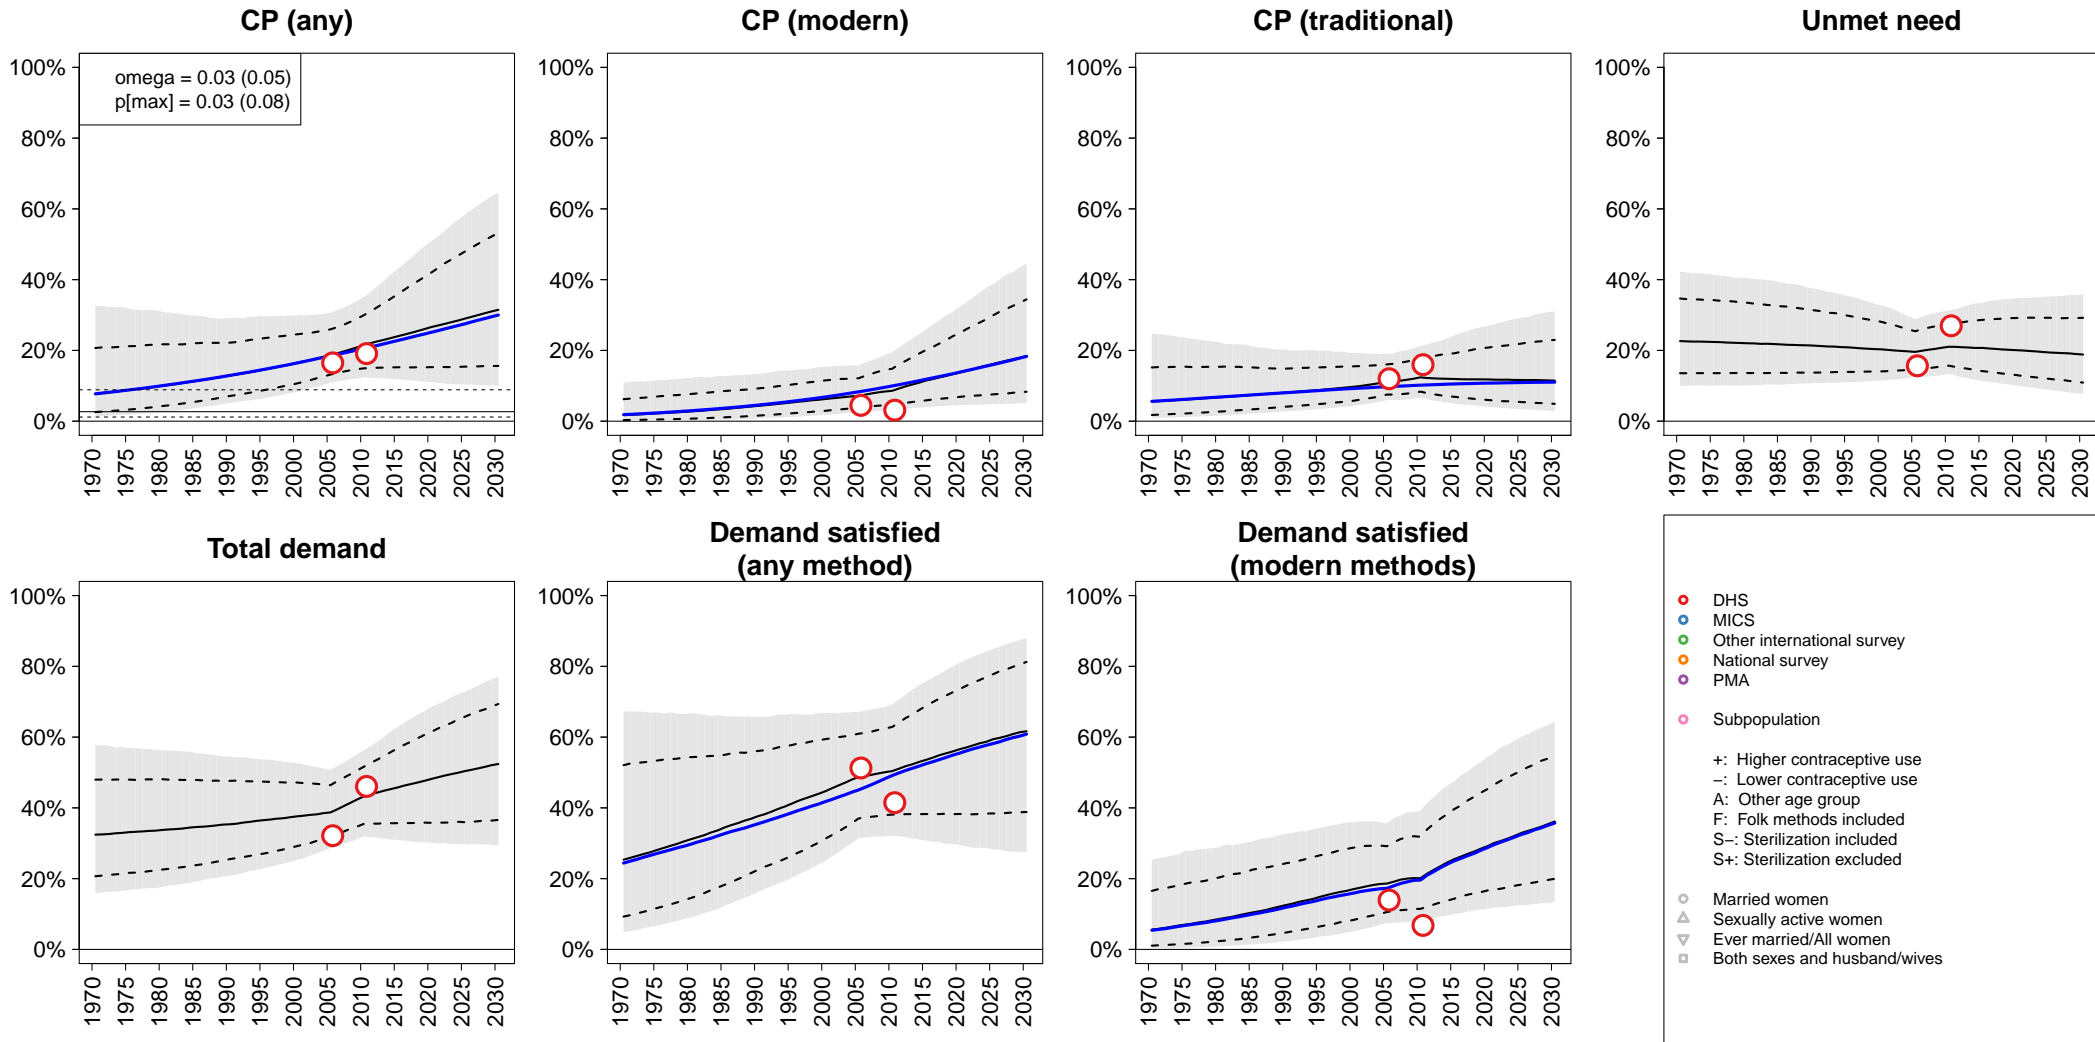

Azerbaijan (Western Asia) --- Married / In-Union

CP (any)

CP (modern)

CP (traditional)

Unmet need

Total demand

Demand satisfied (any method)

Demand satisfied (modern methods)

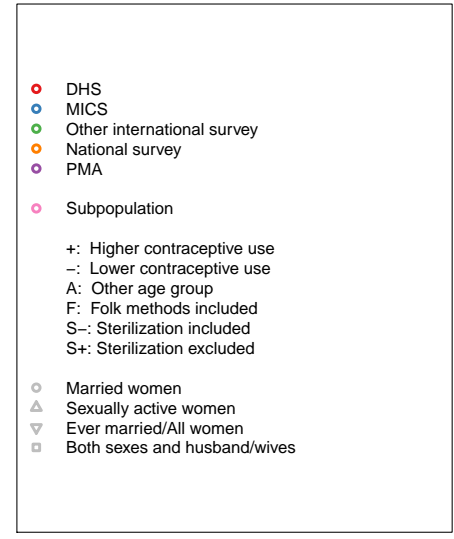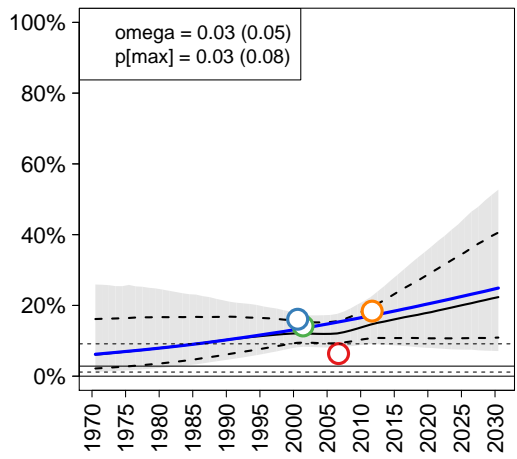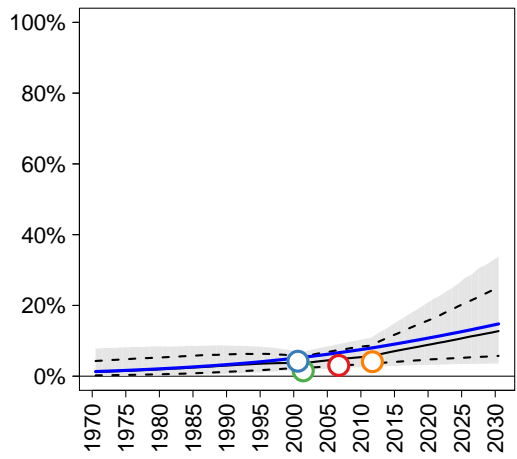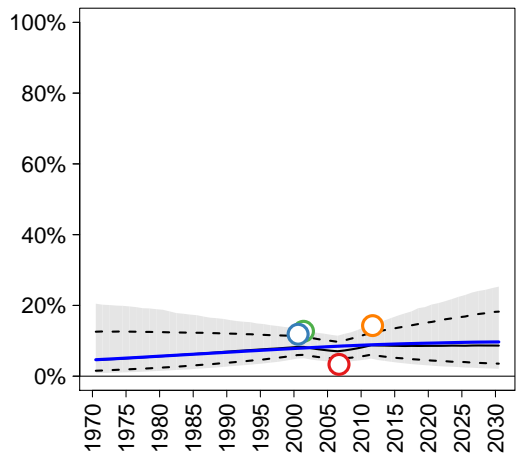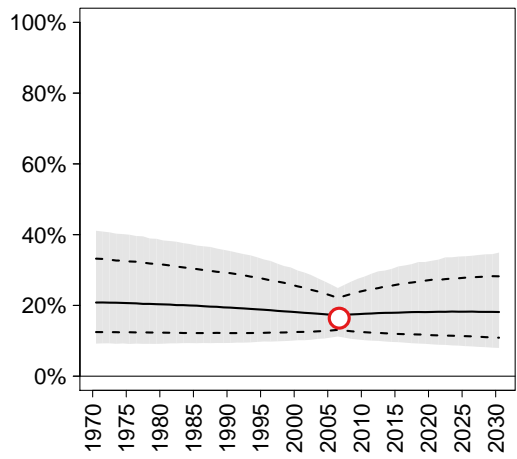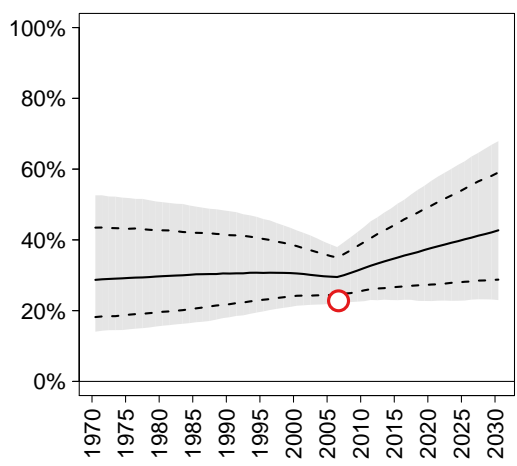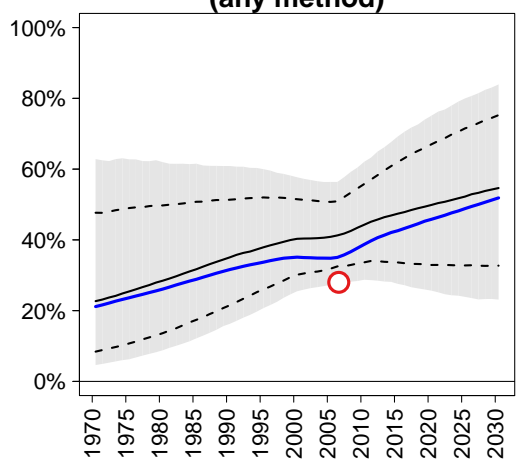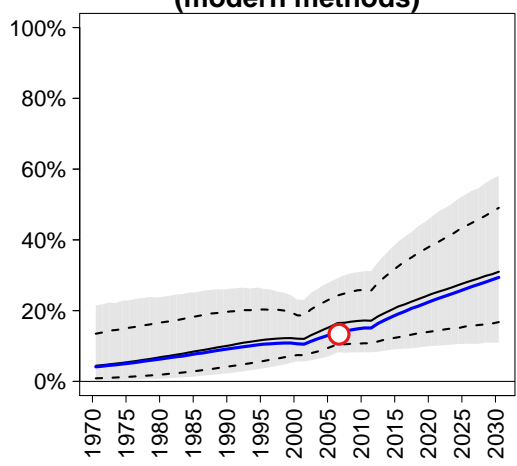

Bahrain (Western Asia) --- Married / In-Union

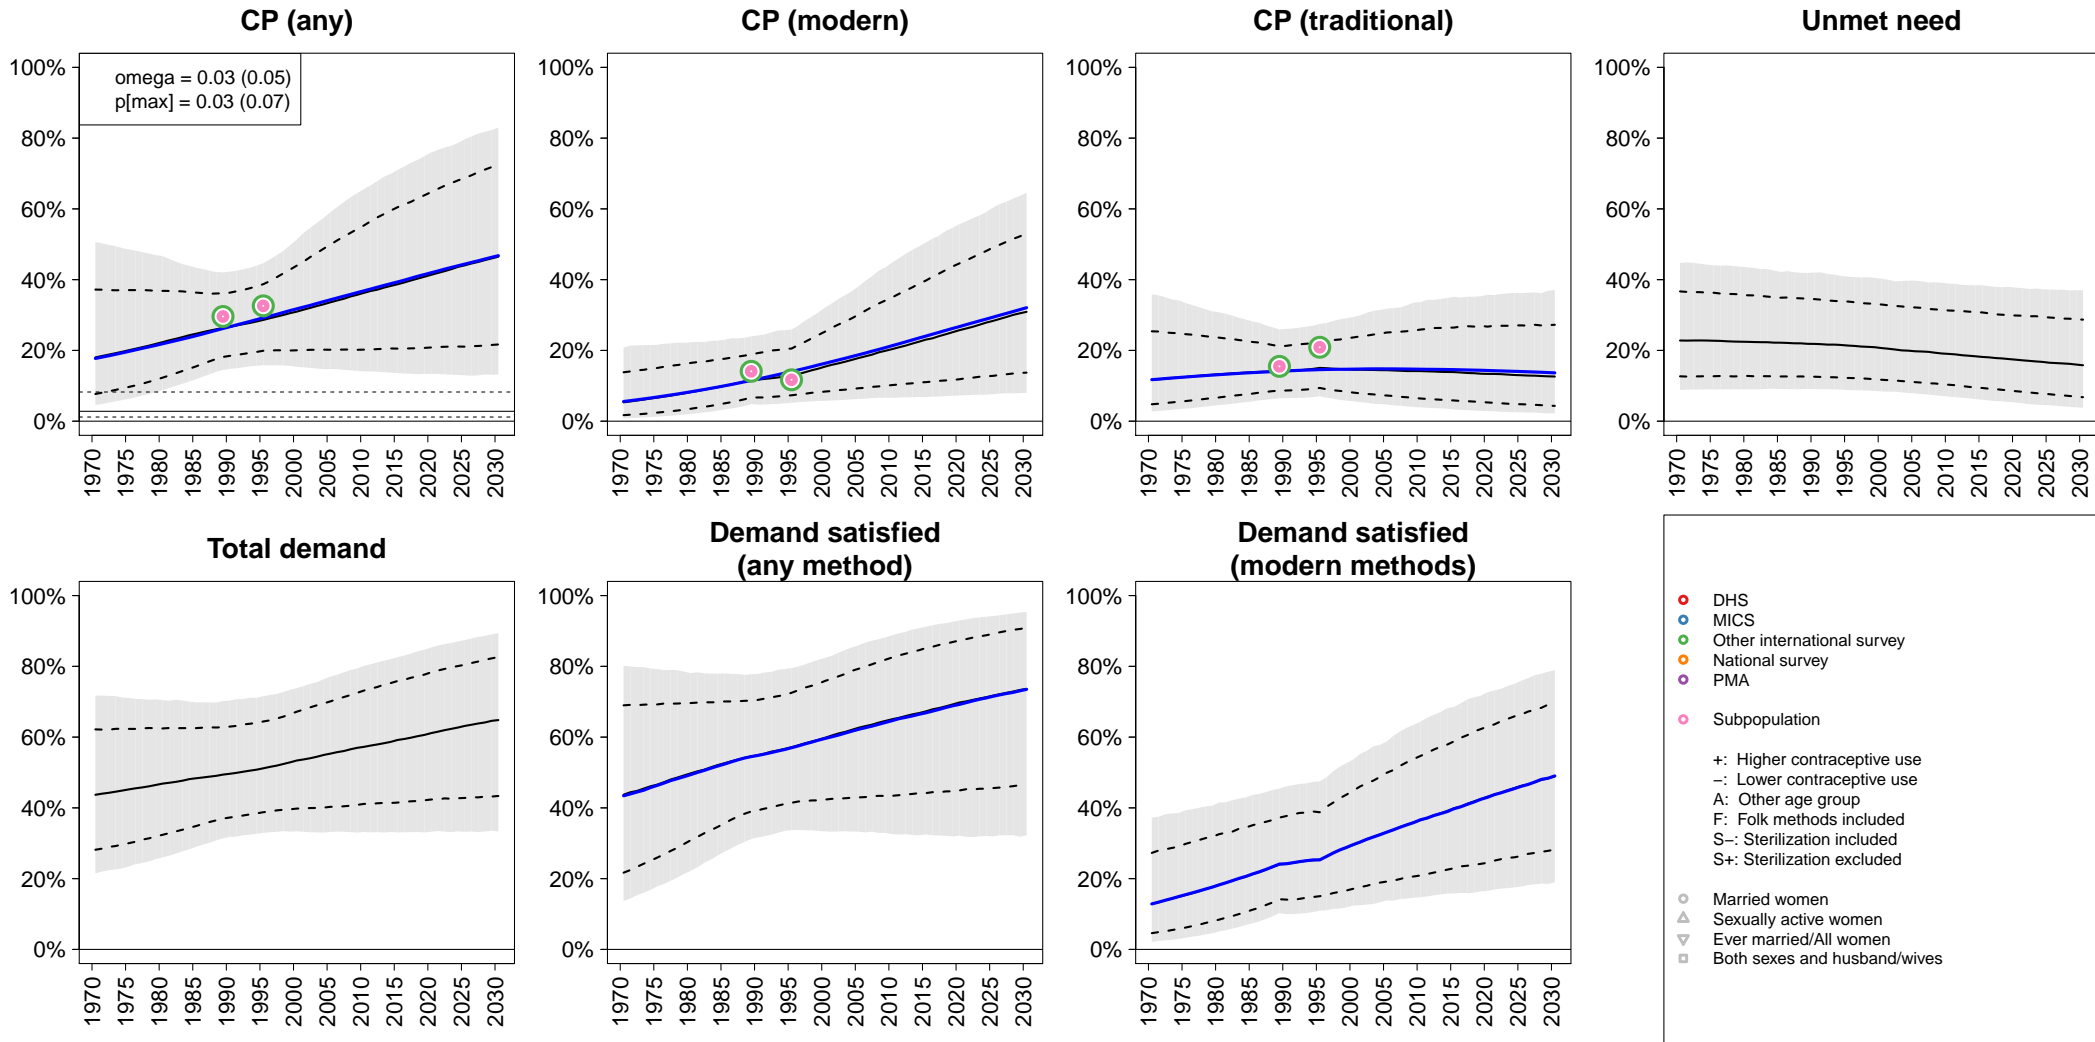

Bangladesh (Southern Asia) --- Married / In-Union

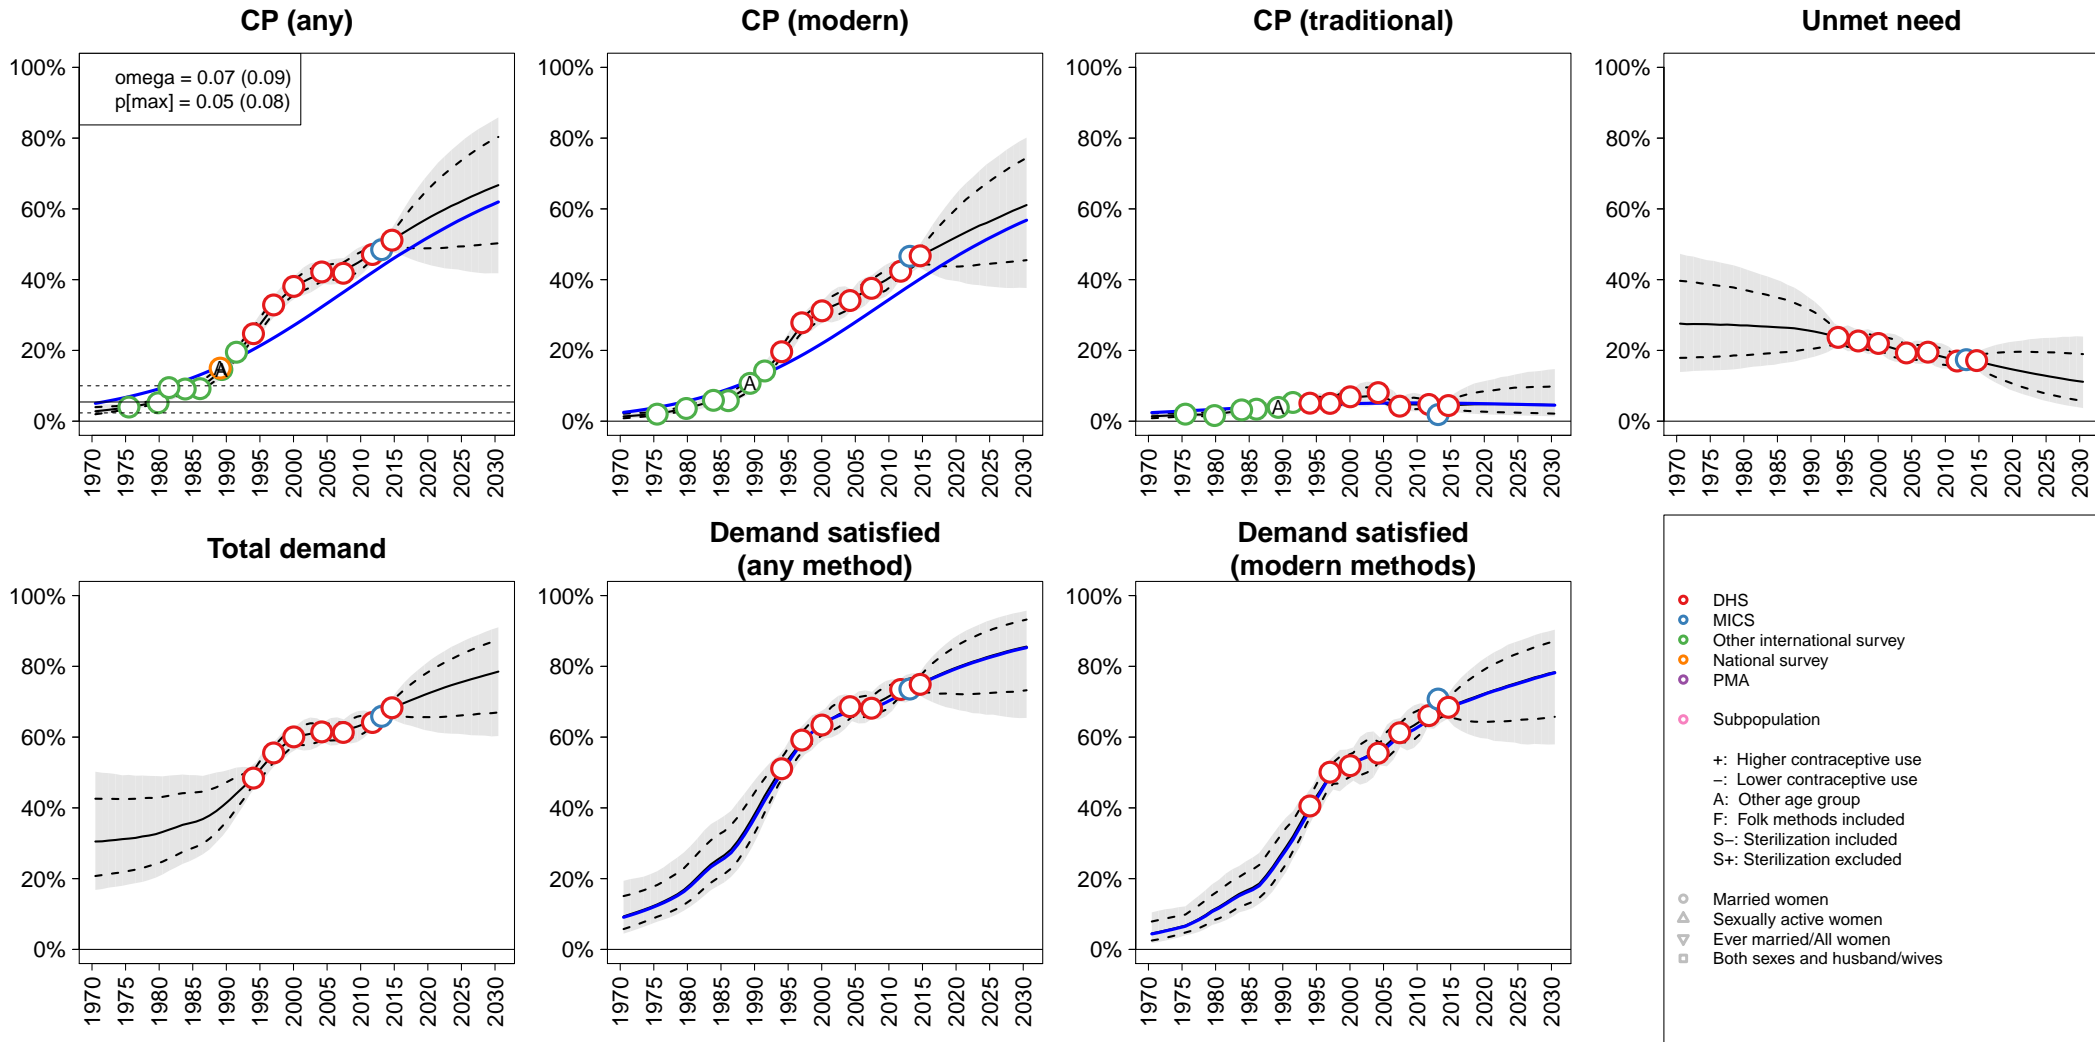

Barbados (Caribbean) --- Married / In-Union

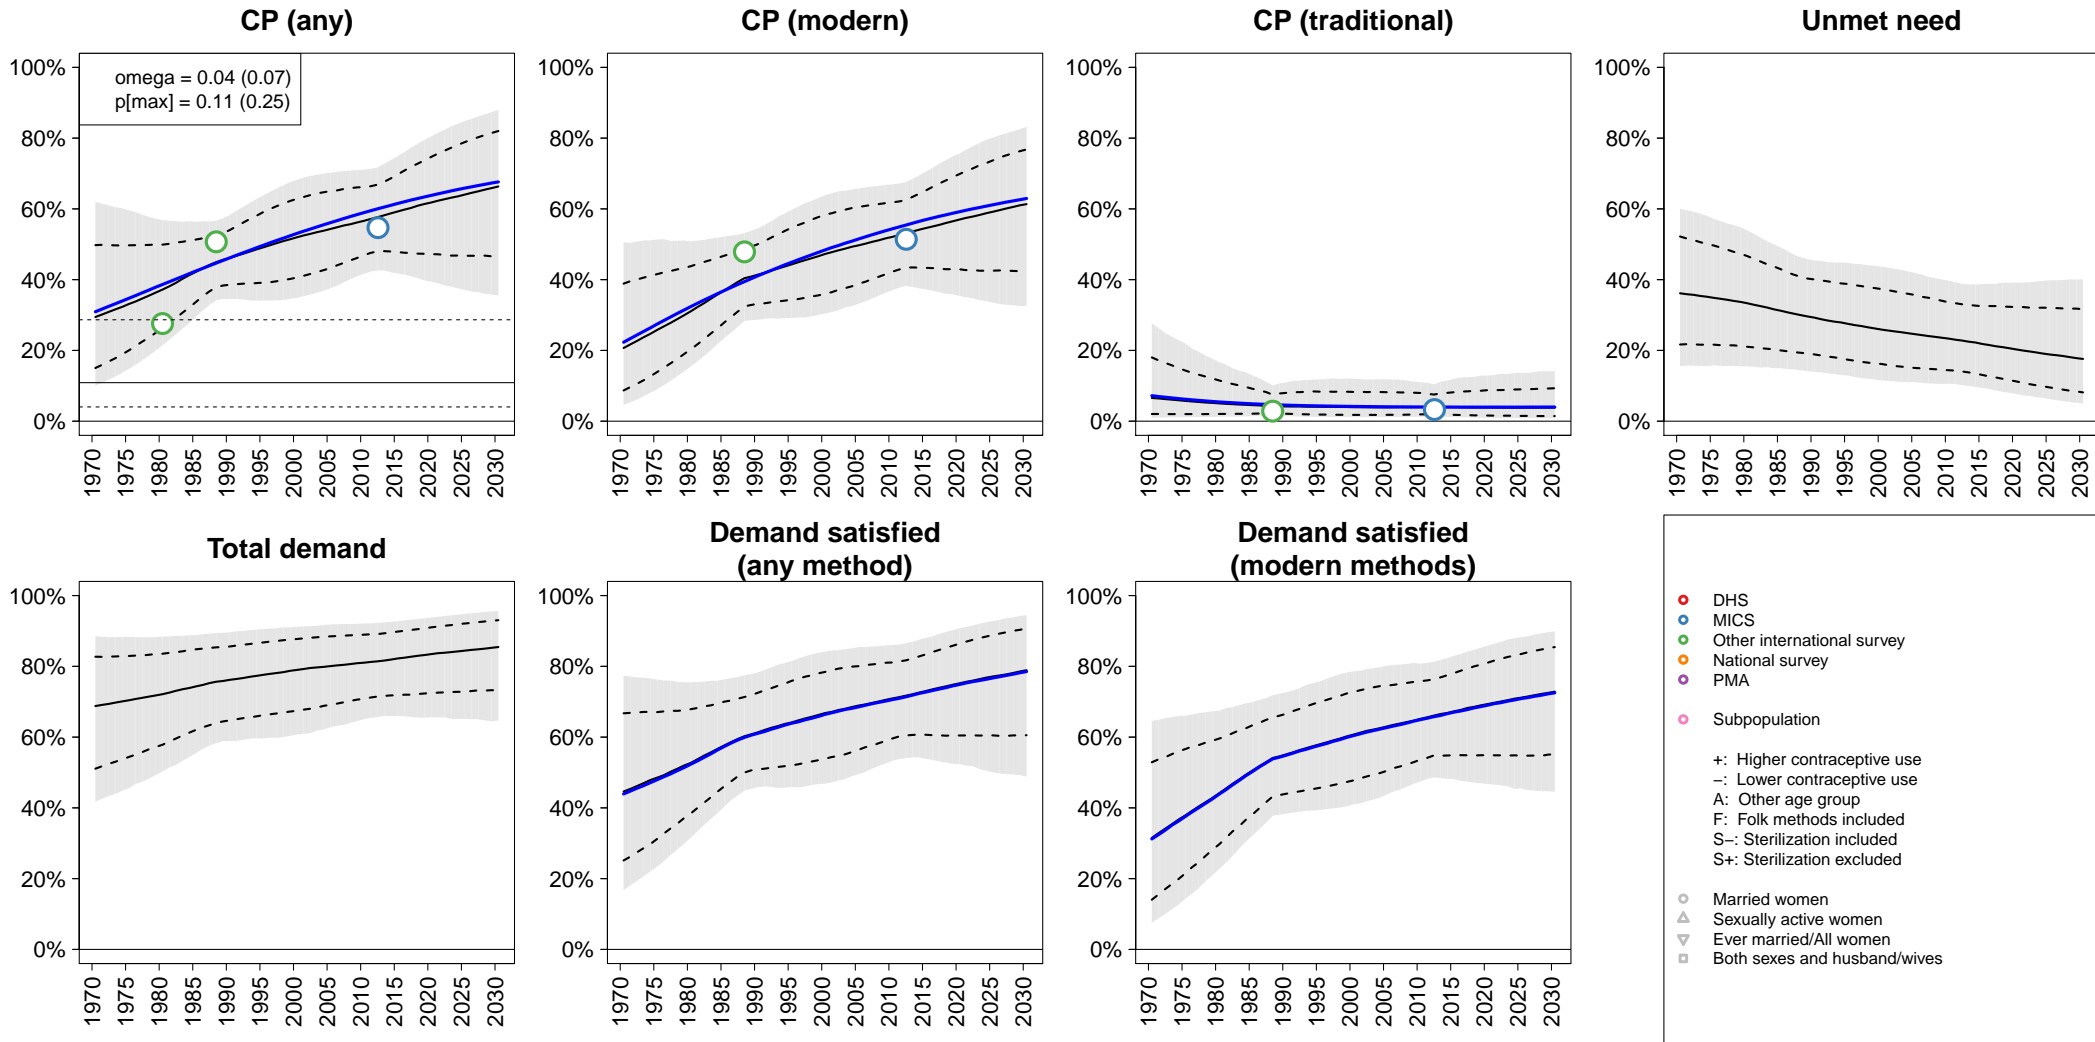



Belize (Central America) --- Married / In-Union

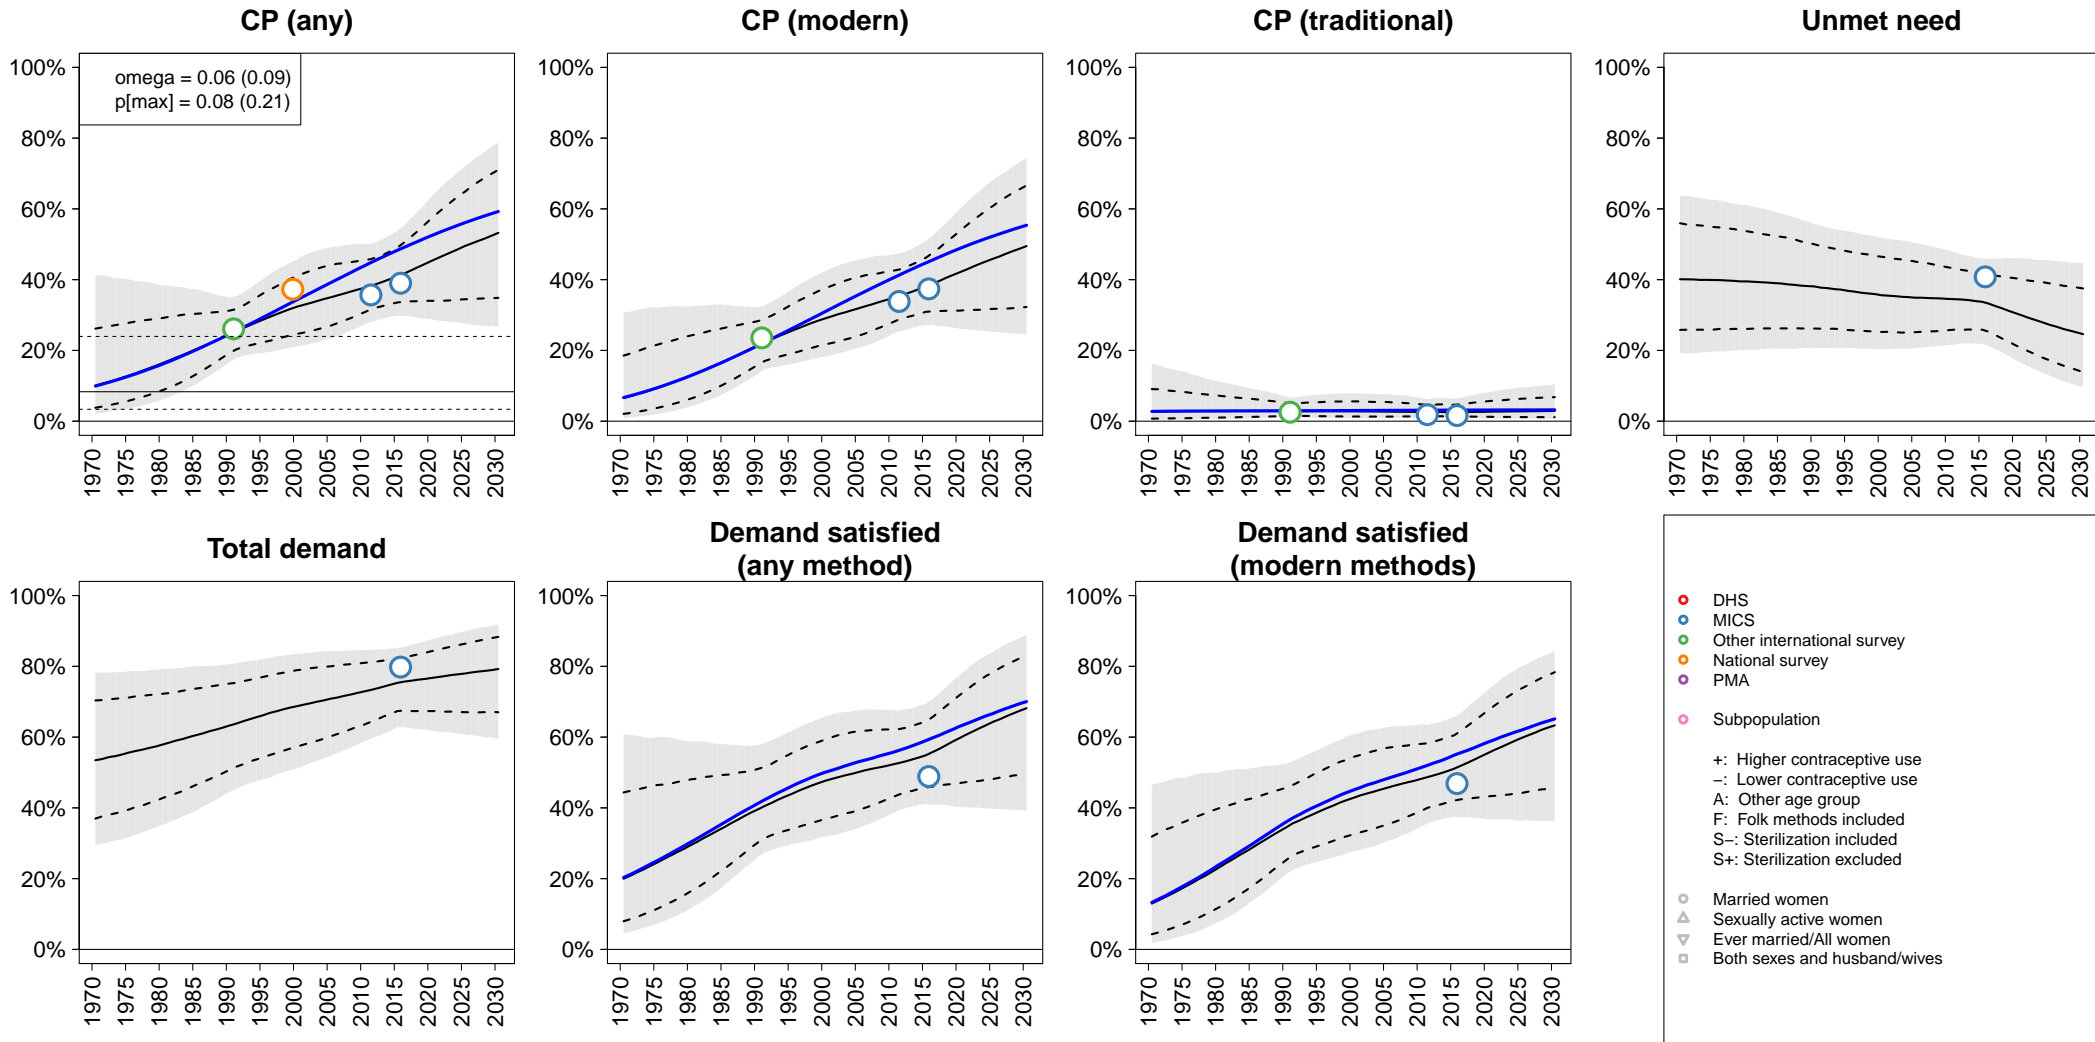

Benin (Western Africa) --- Married / In-Union

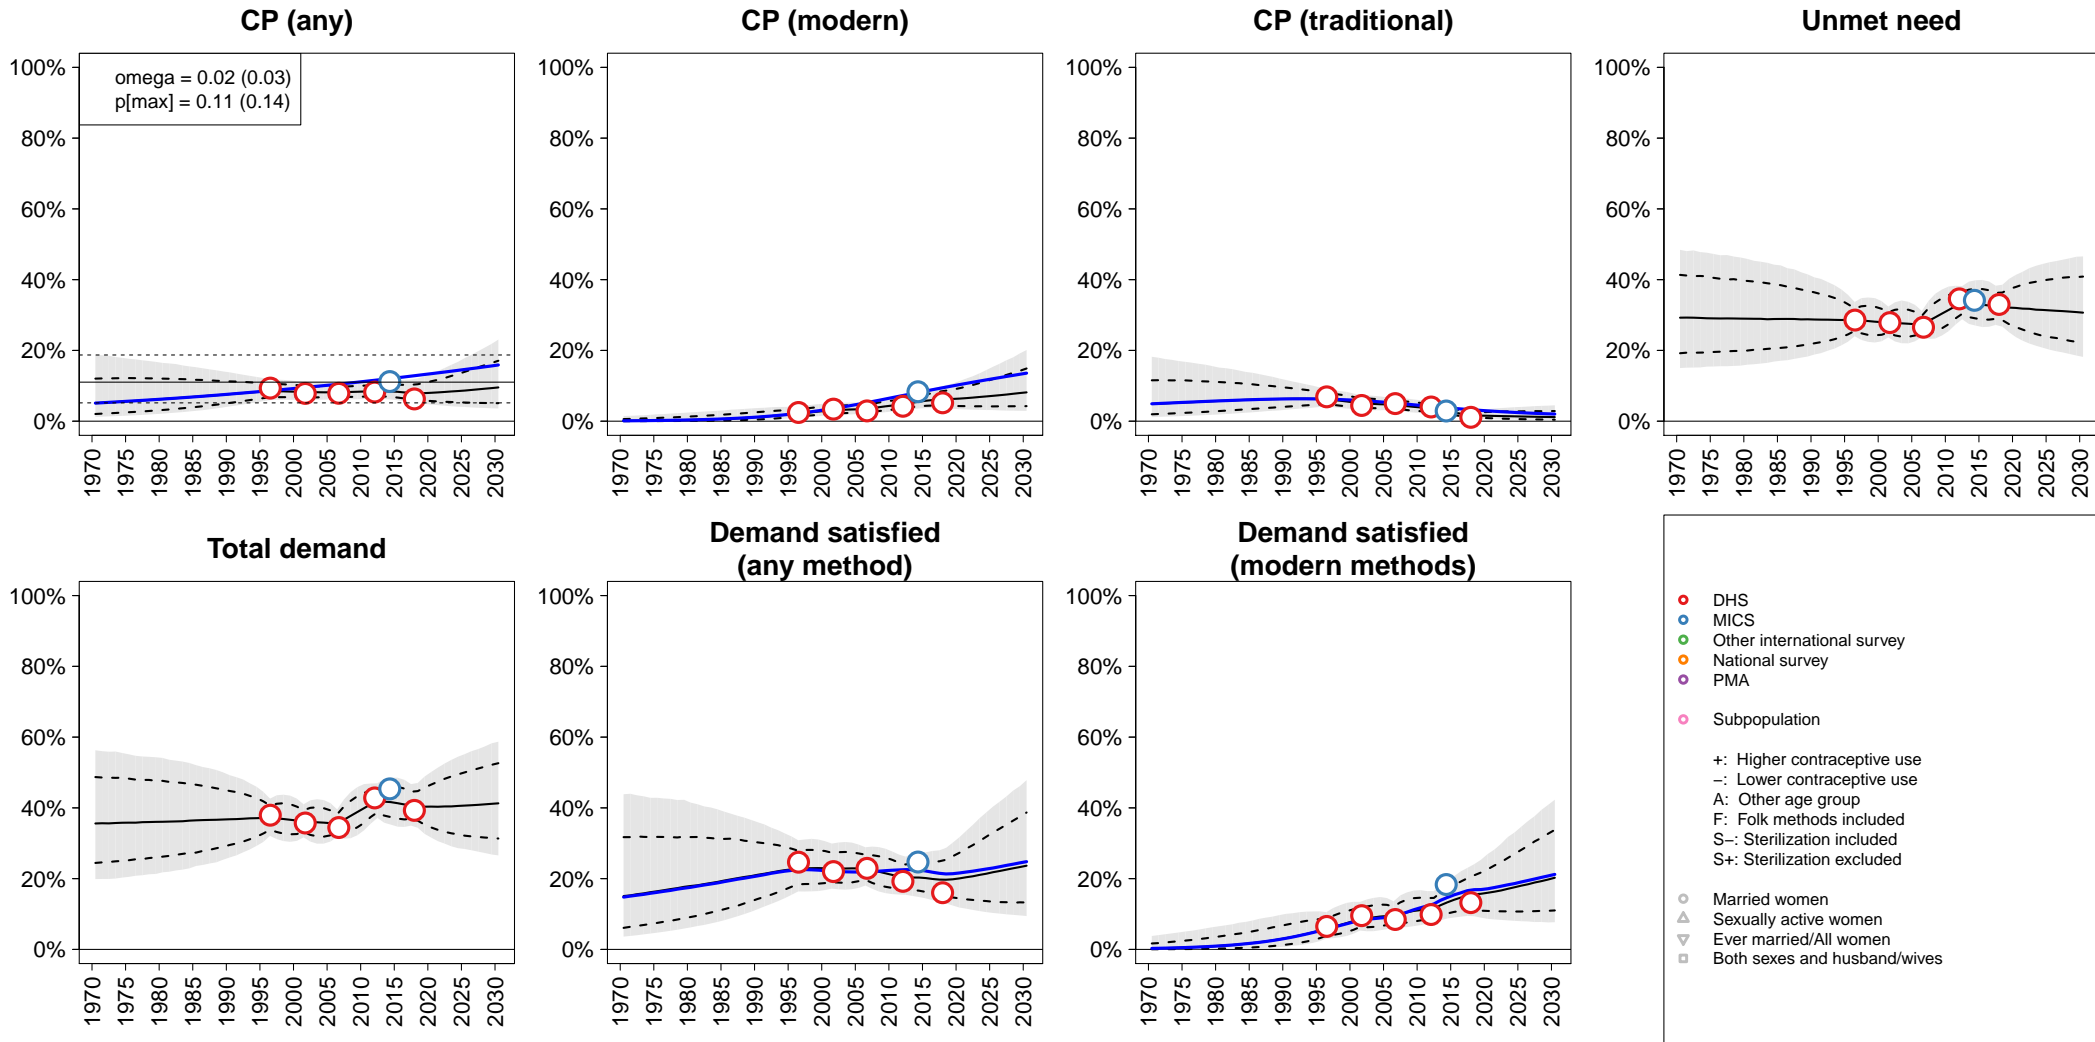

Bolivia, Plurinational State of (South America) --- Married / In-Union

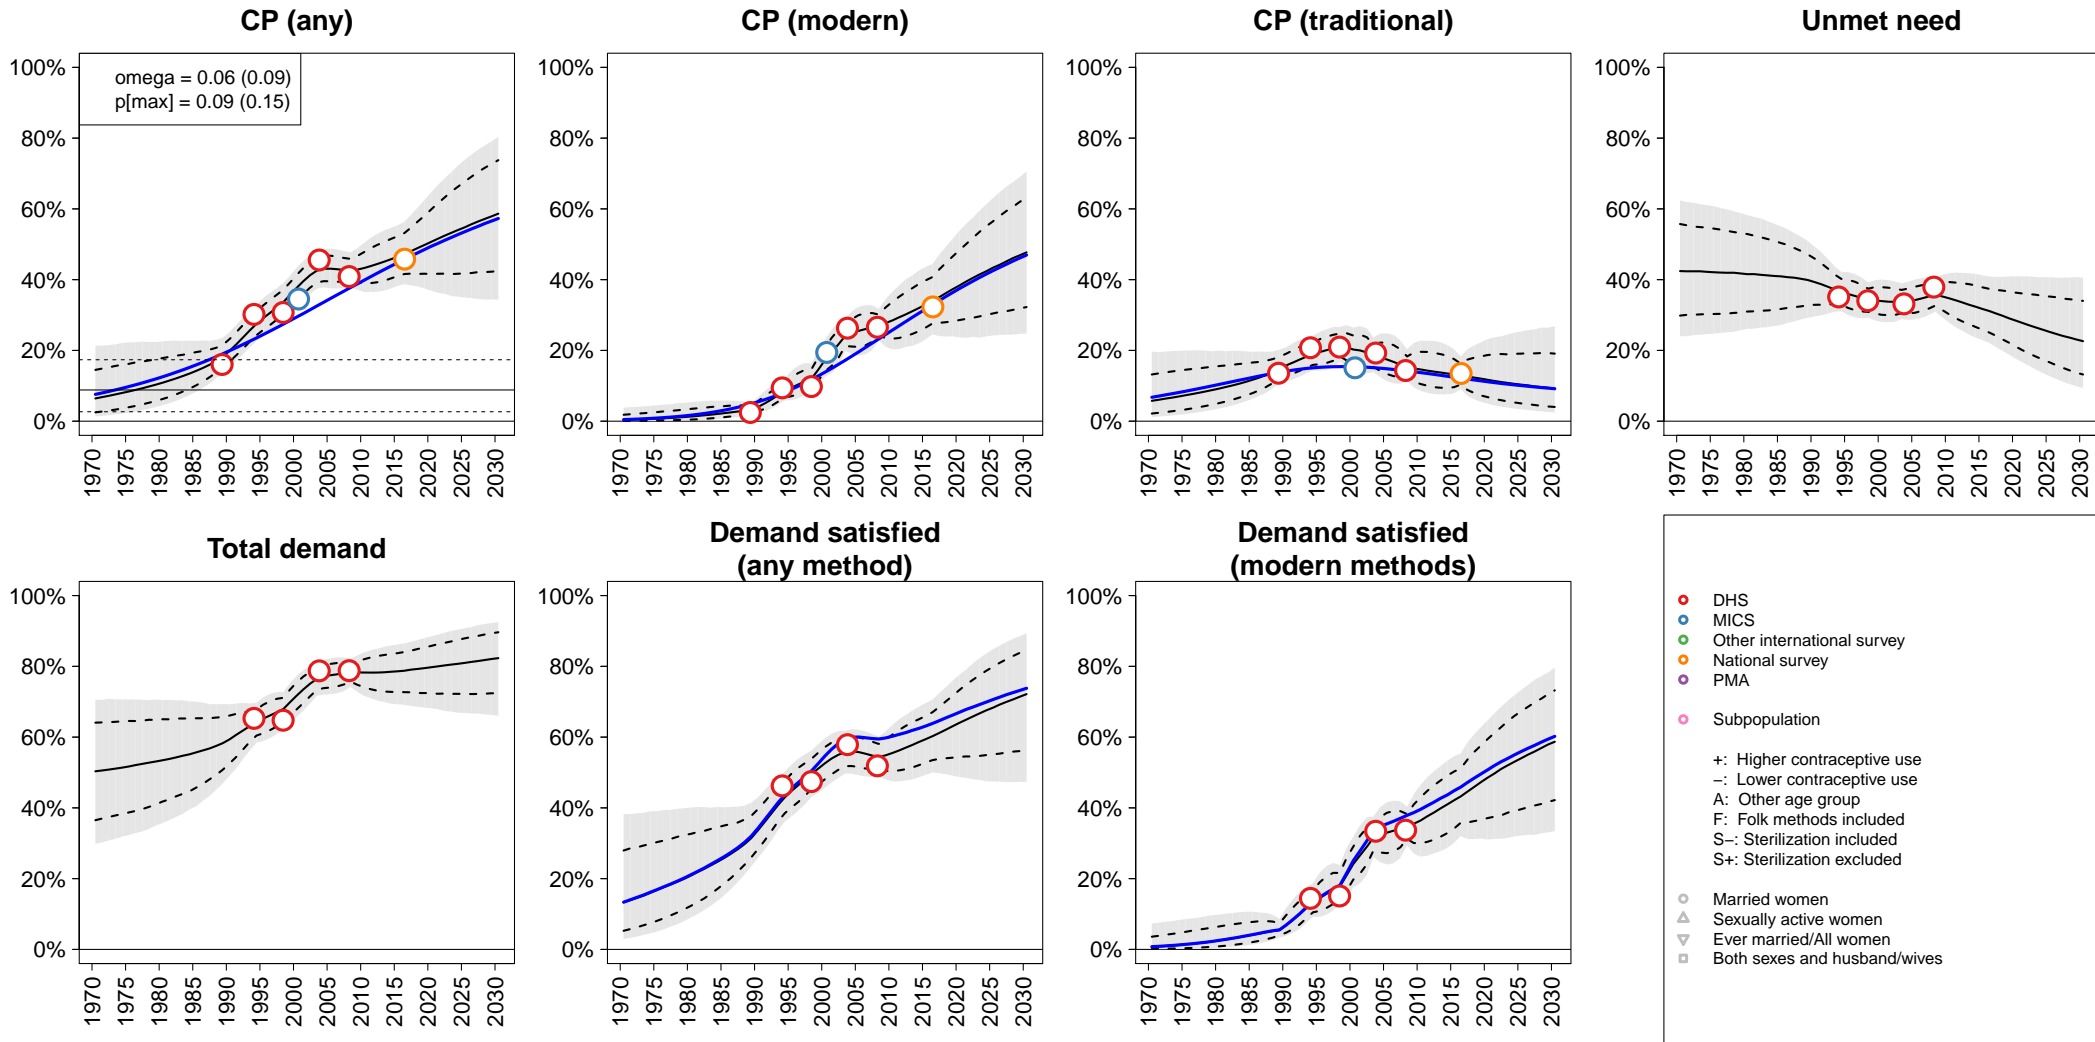

Bosnia and Herzegovina (Southern Europe) --- Married / In-Union

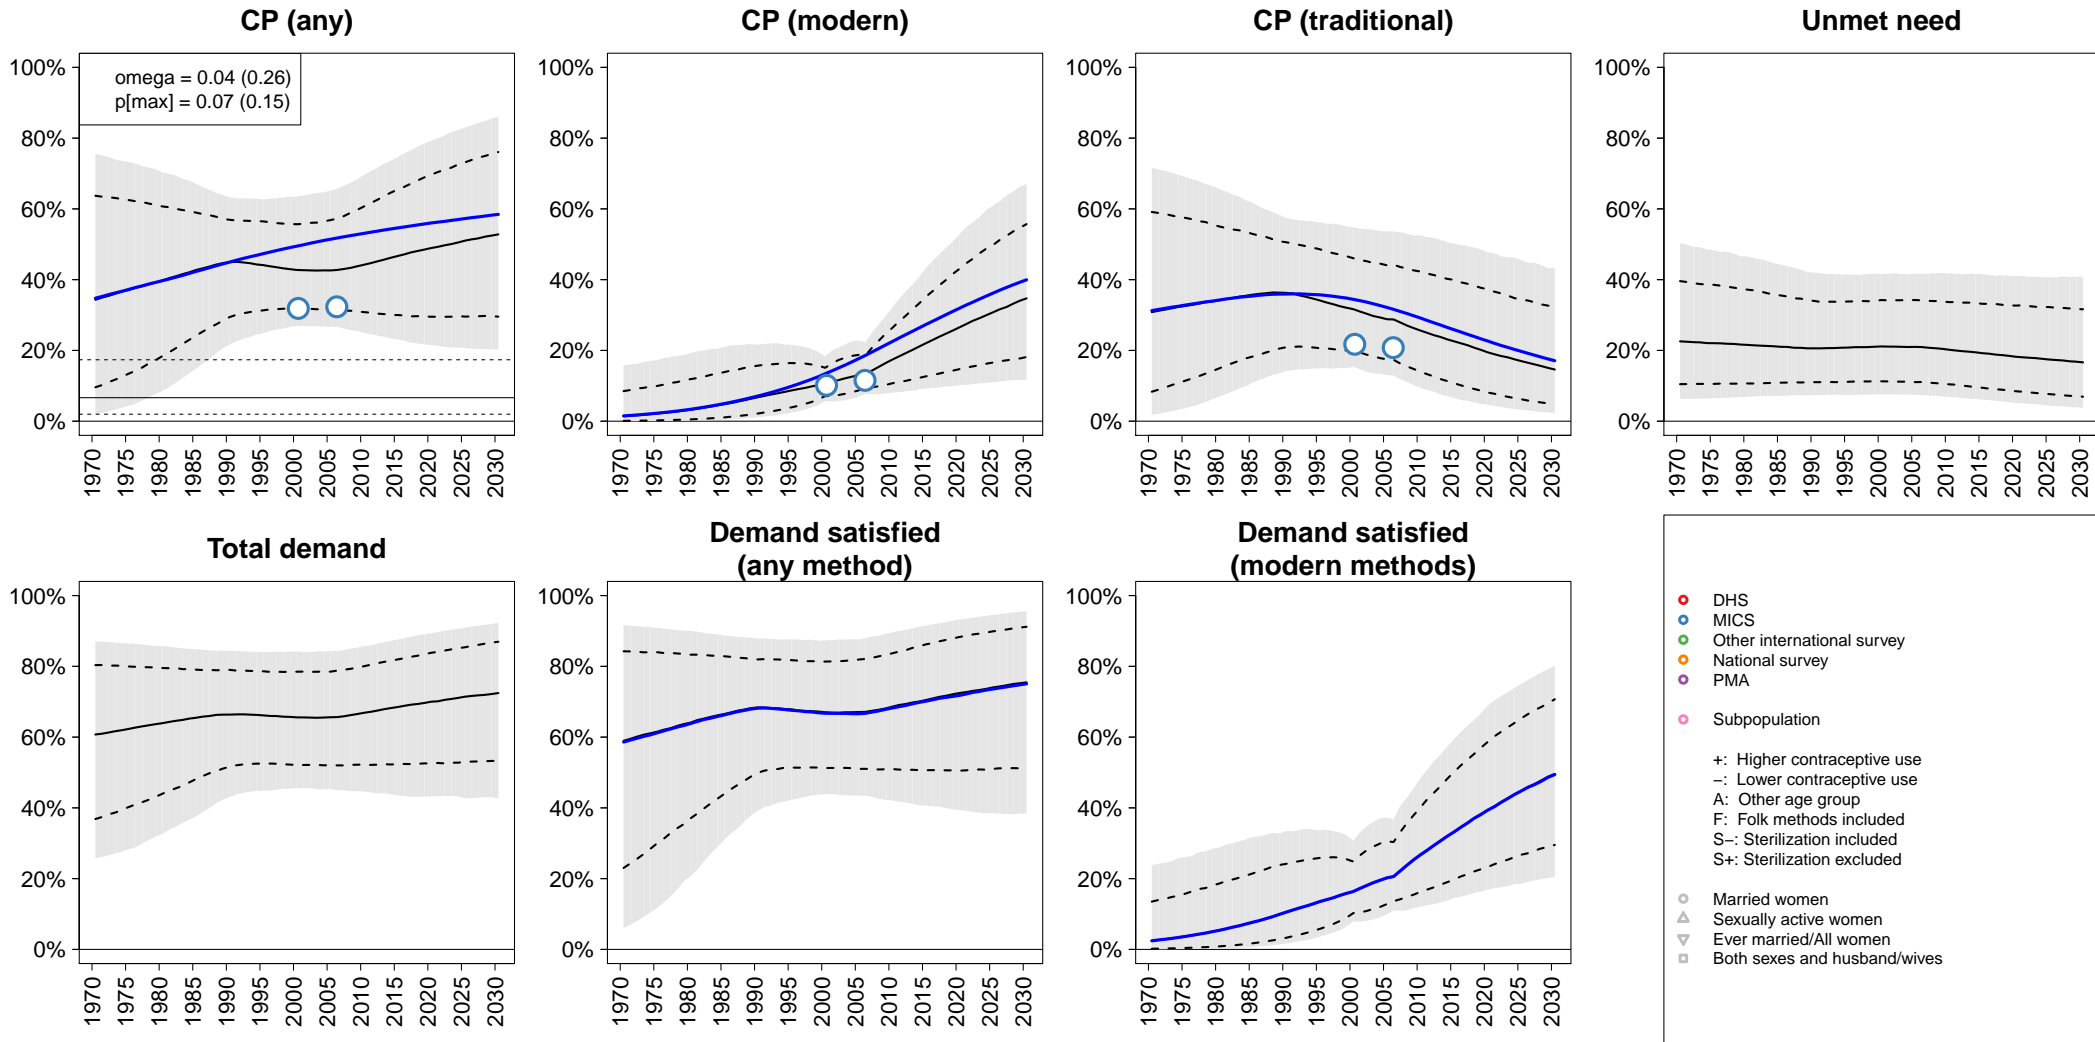

Botswana (Southern Africa) --- Married / In-Union

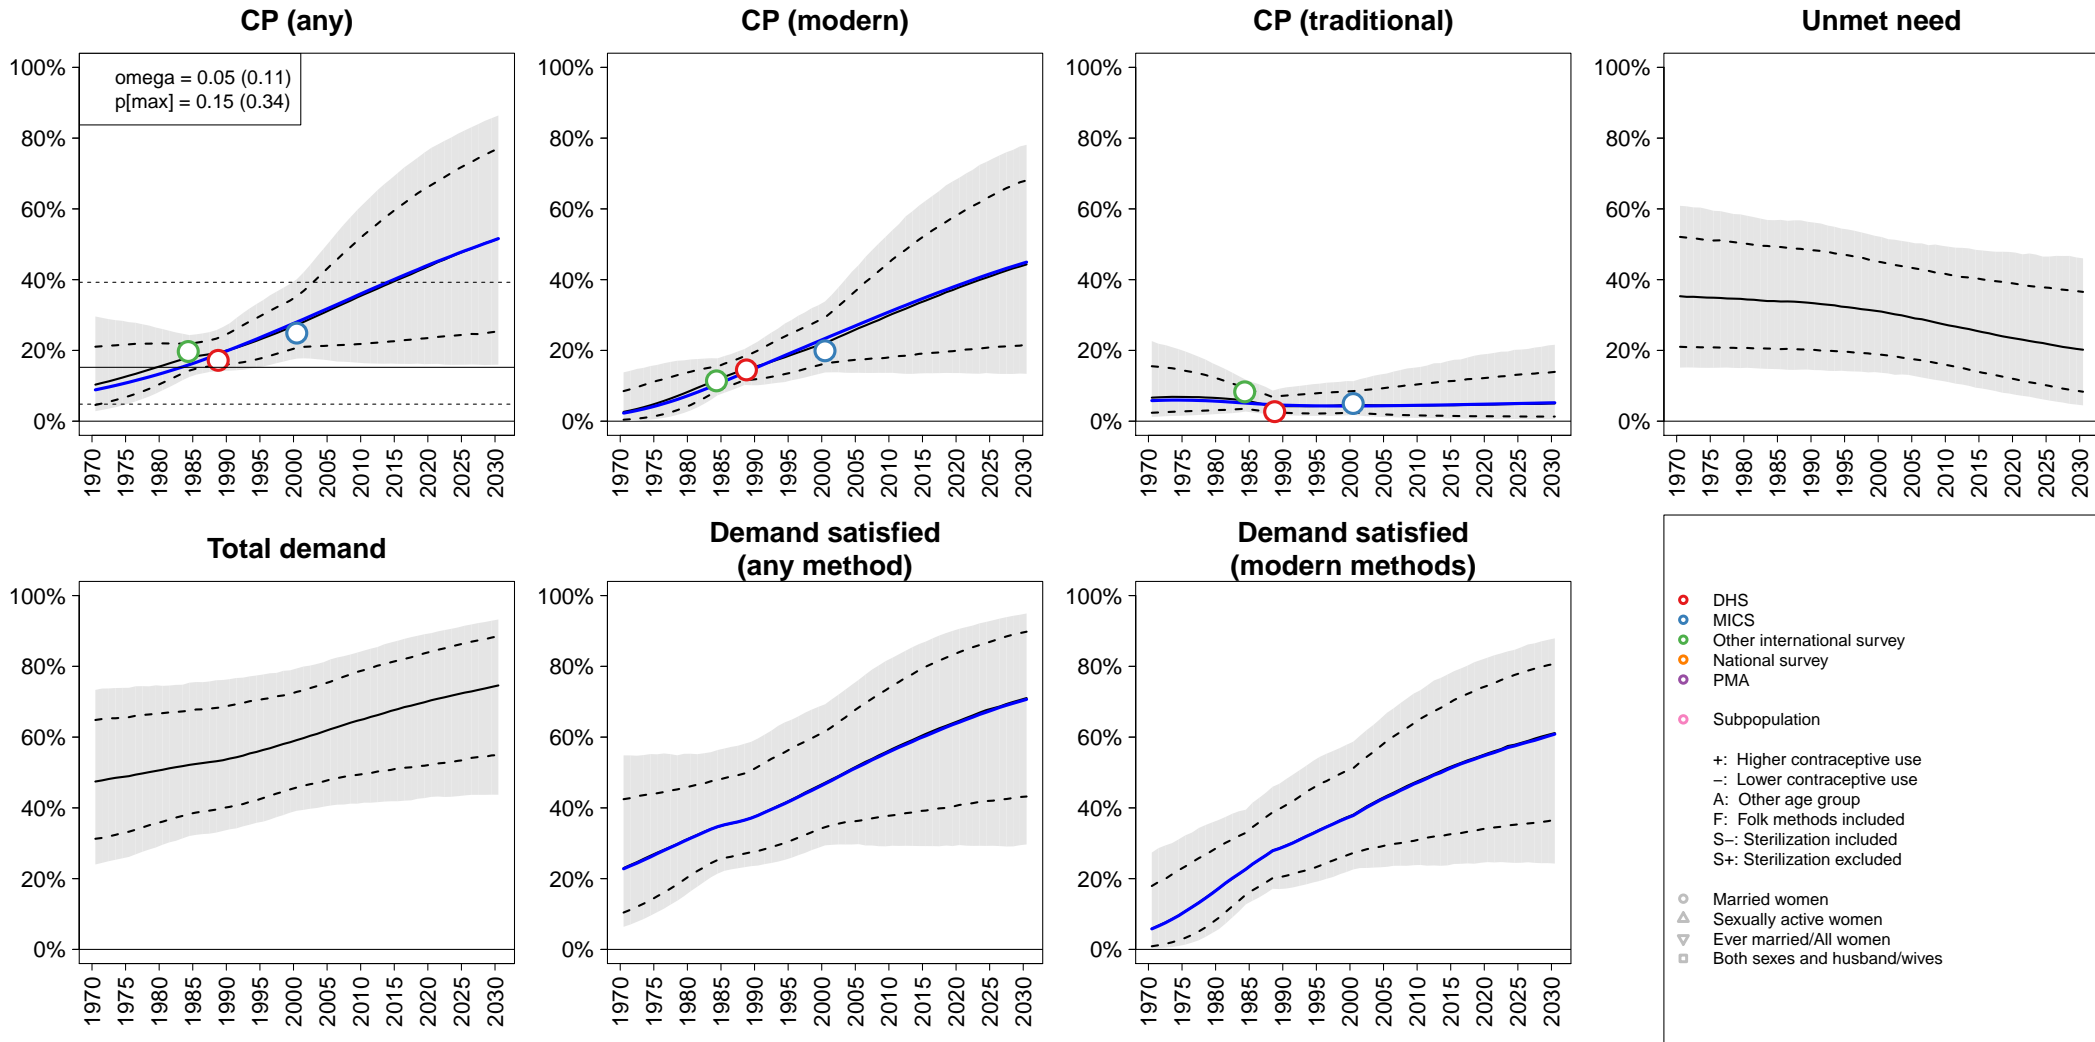

Brazil (South America) --- Married / In-Union

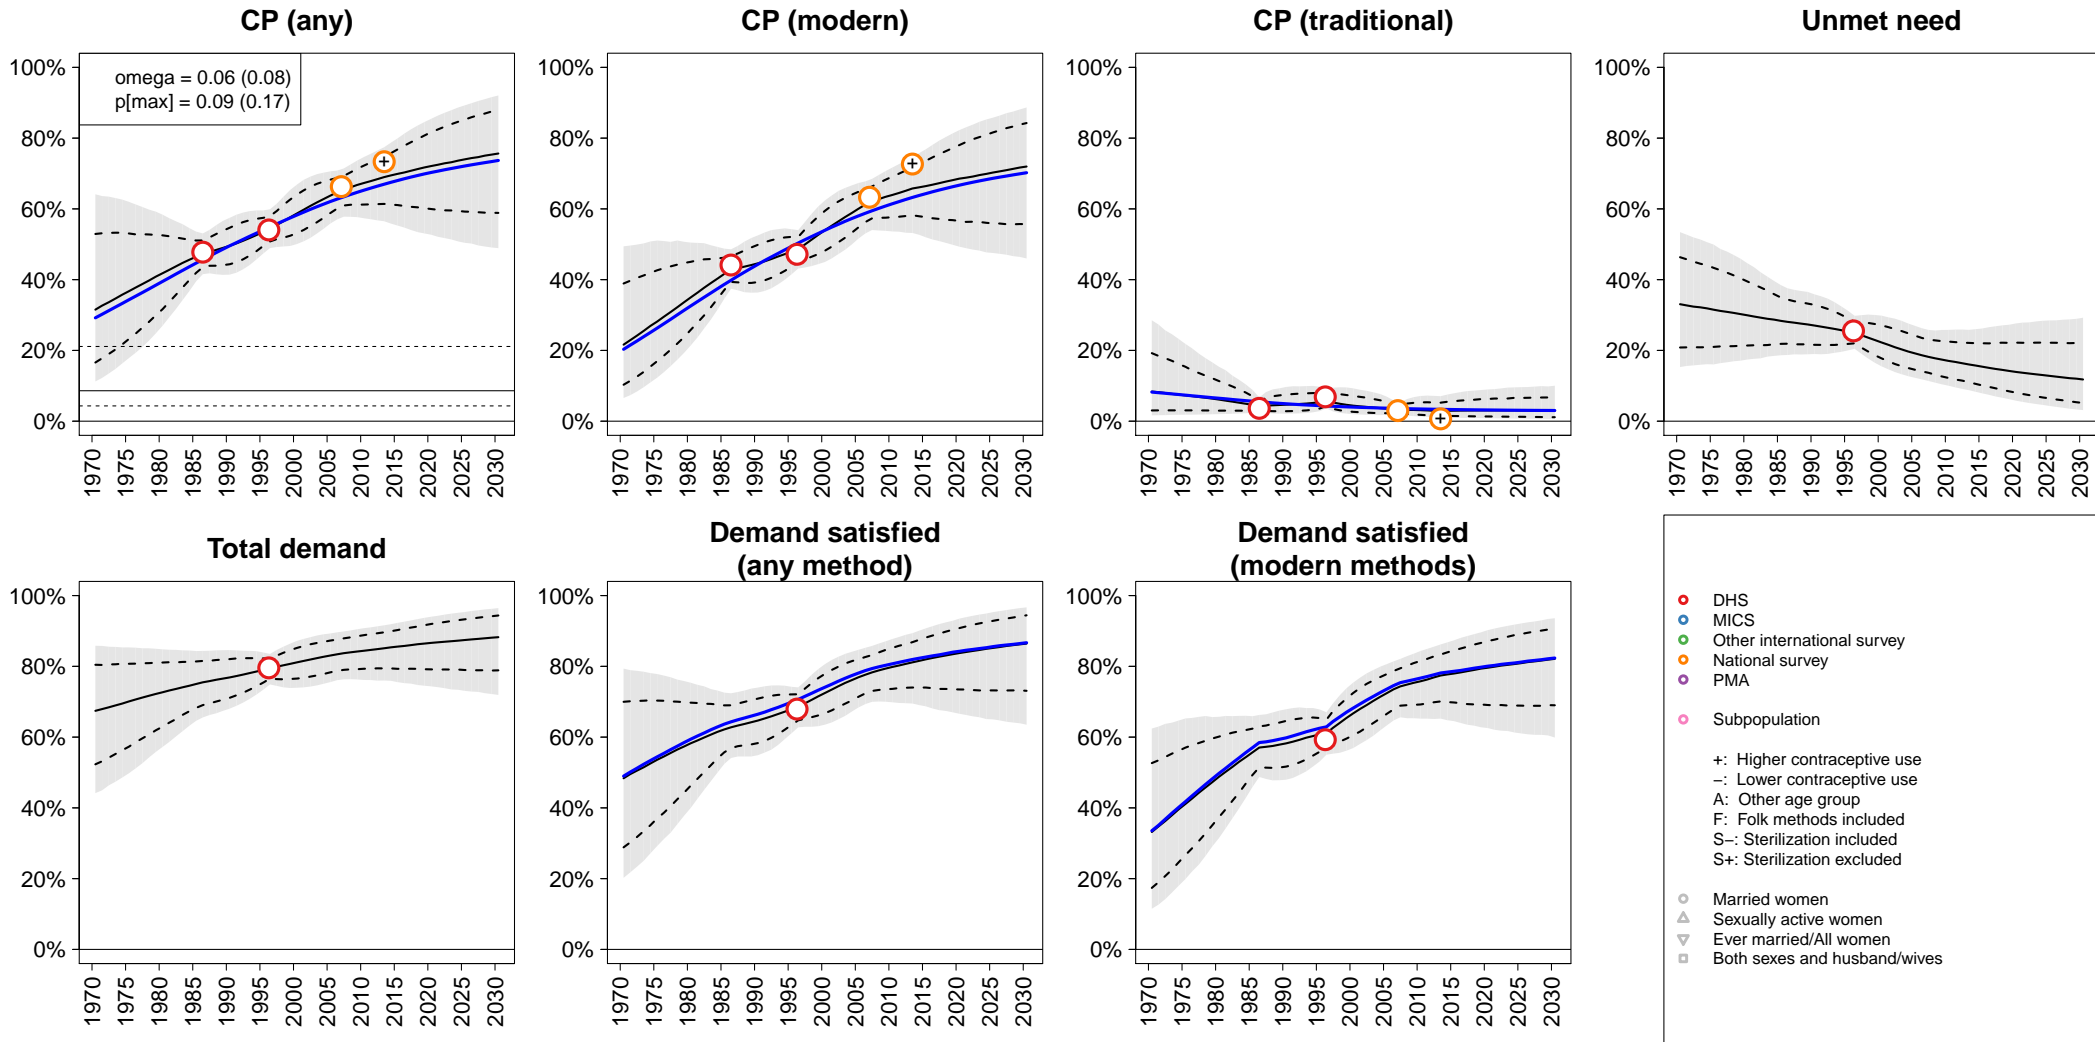

Bulgaria (Eastern Europe) --- Married / In-Union

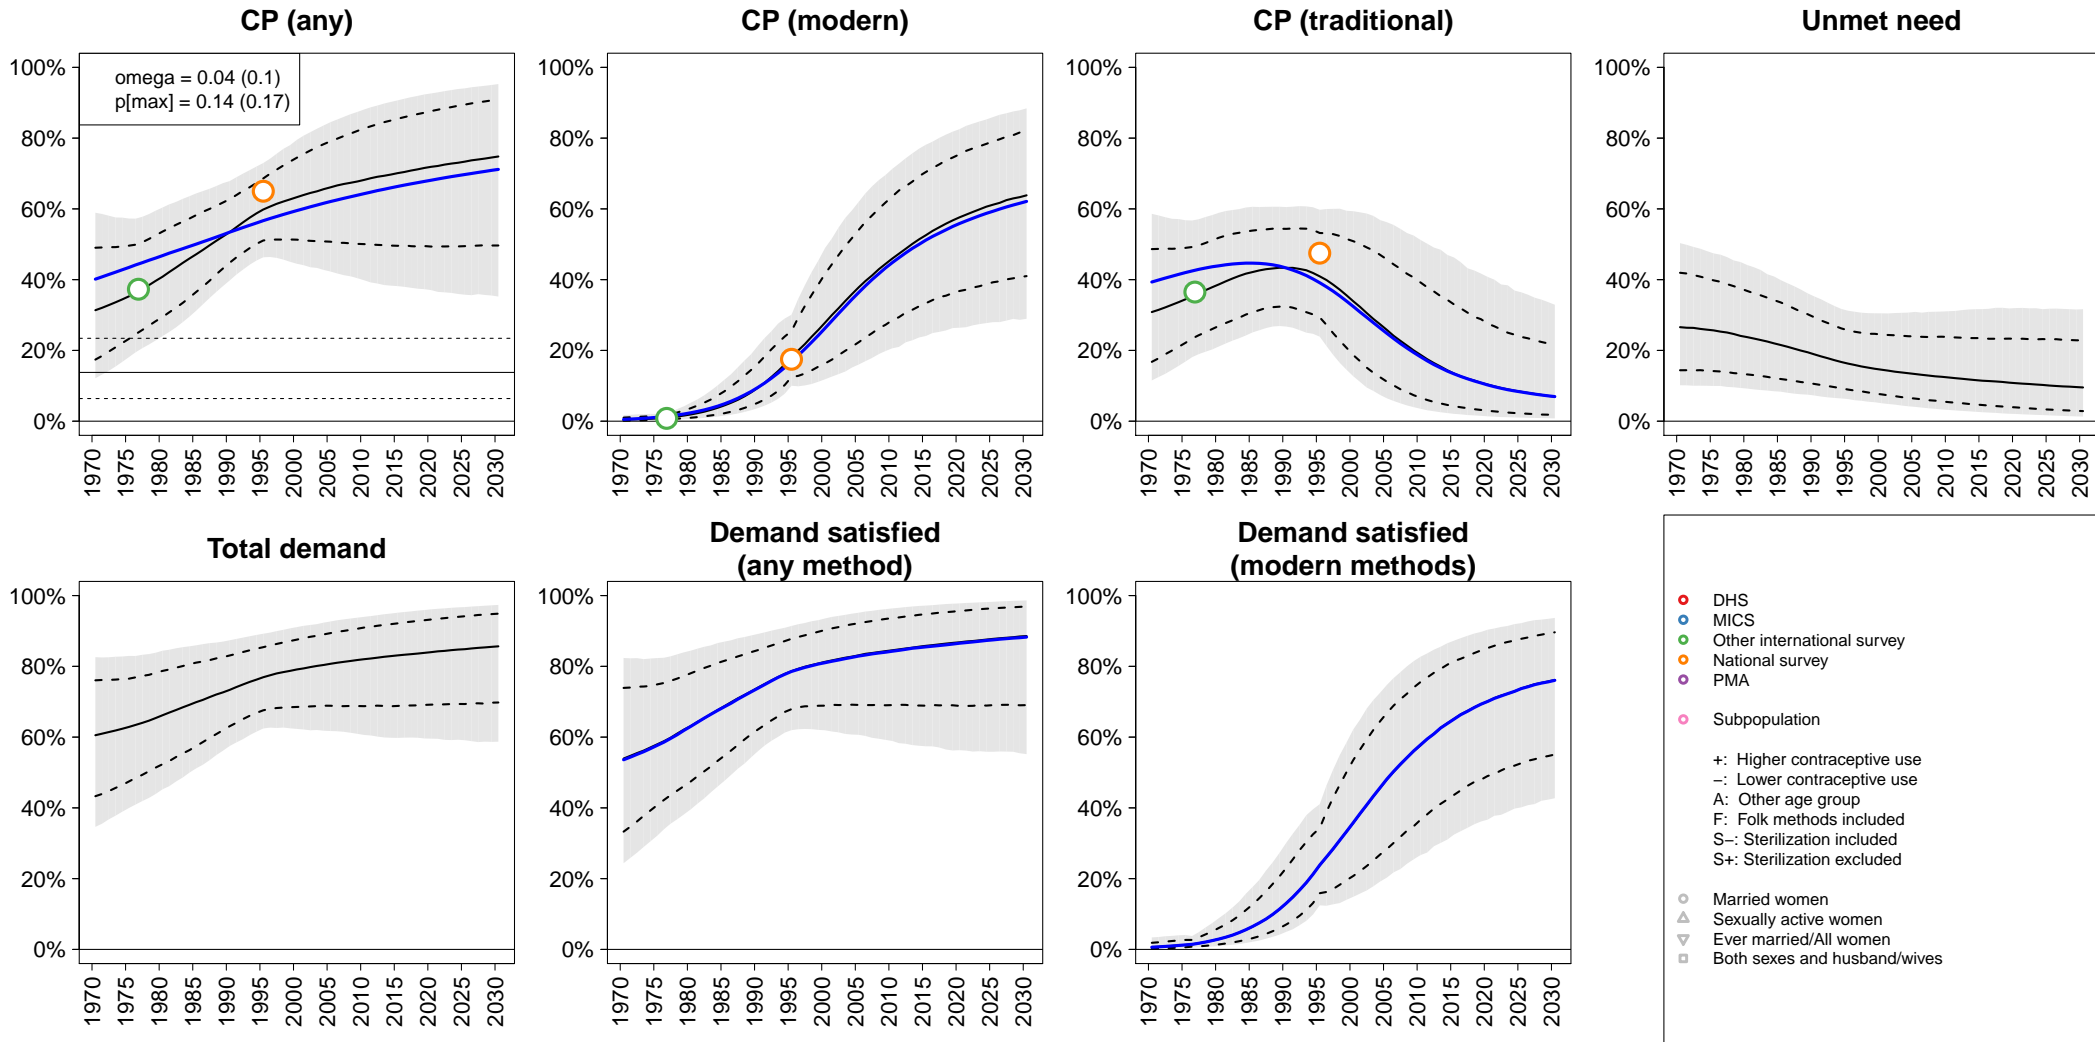

Burkina Faso (Western Africa) --- Married / In-Union

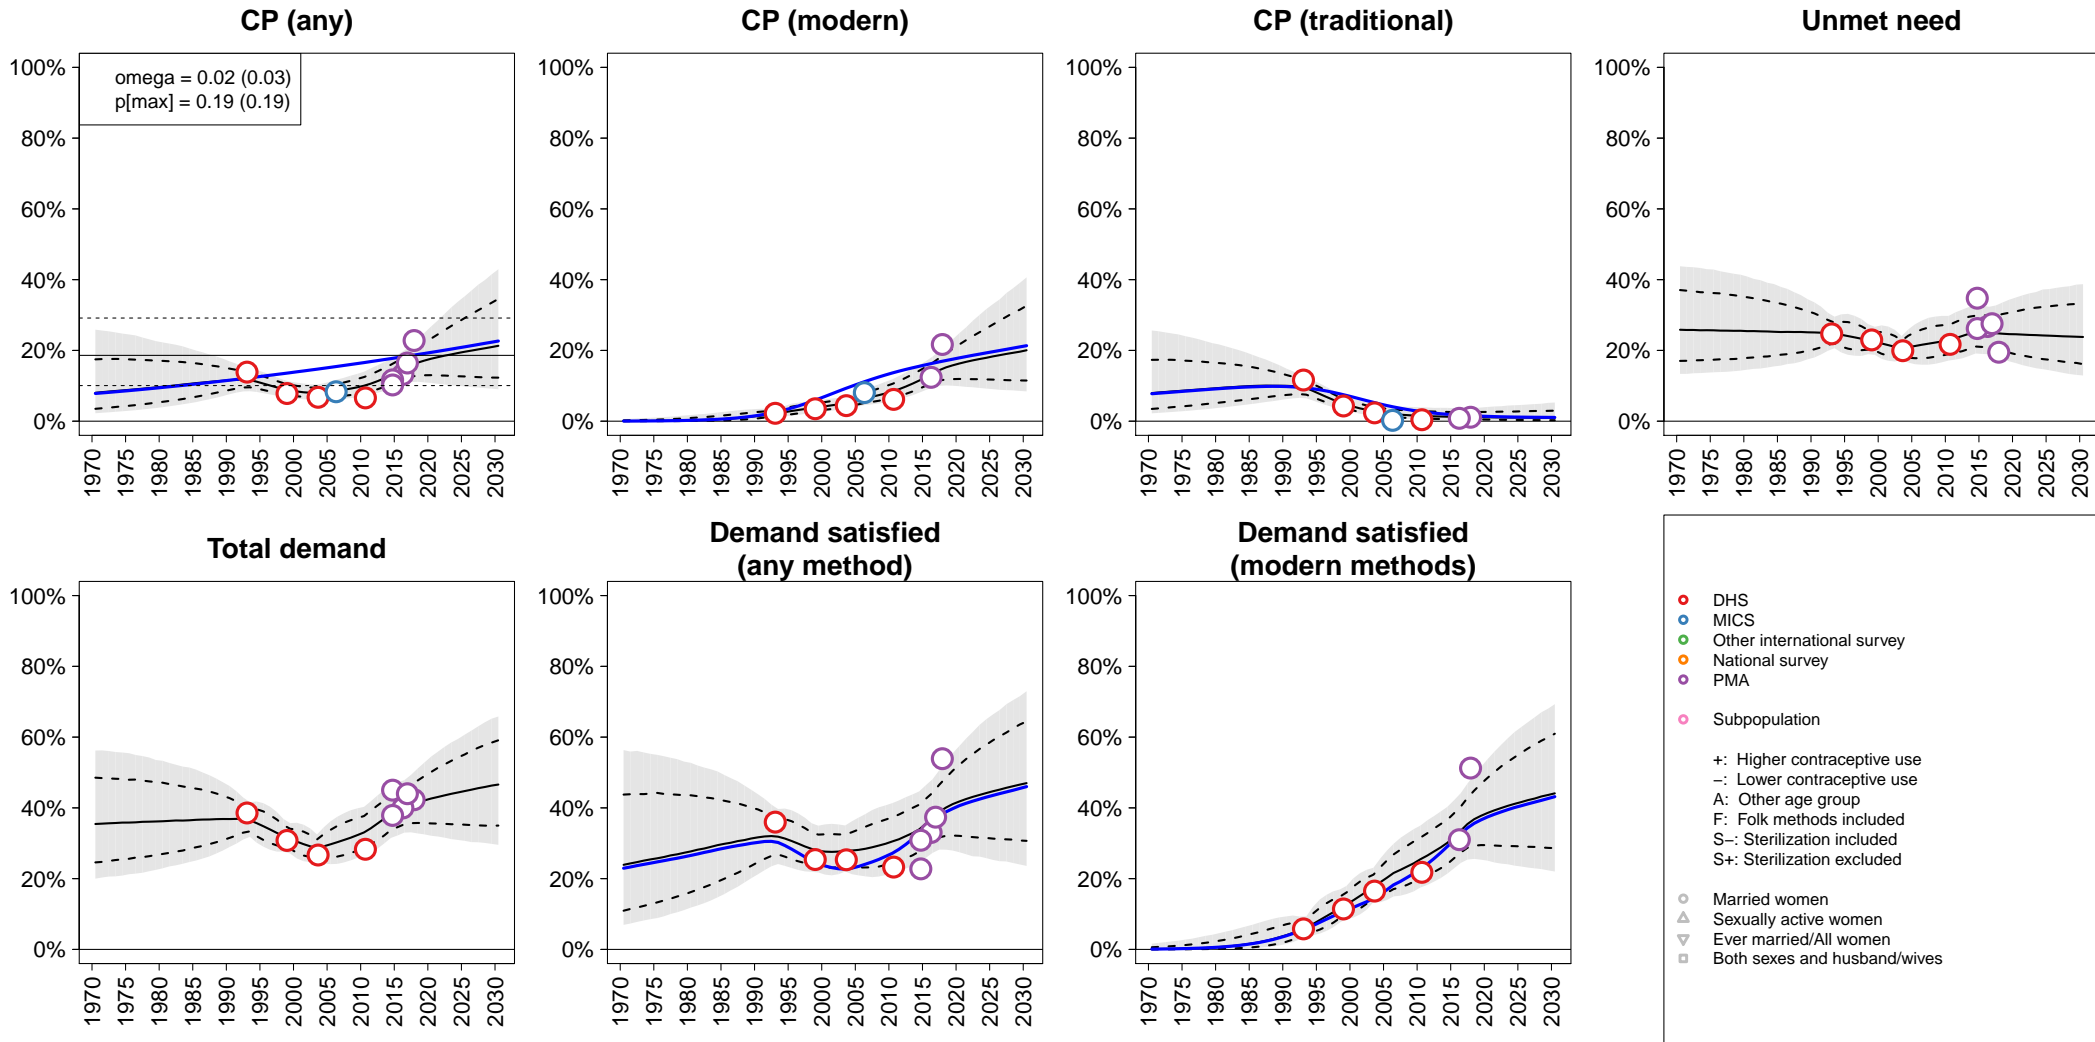



Burundi (Eastern Africa) --- Married / In-Union

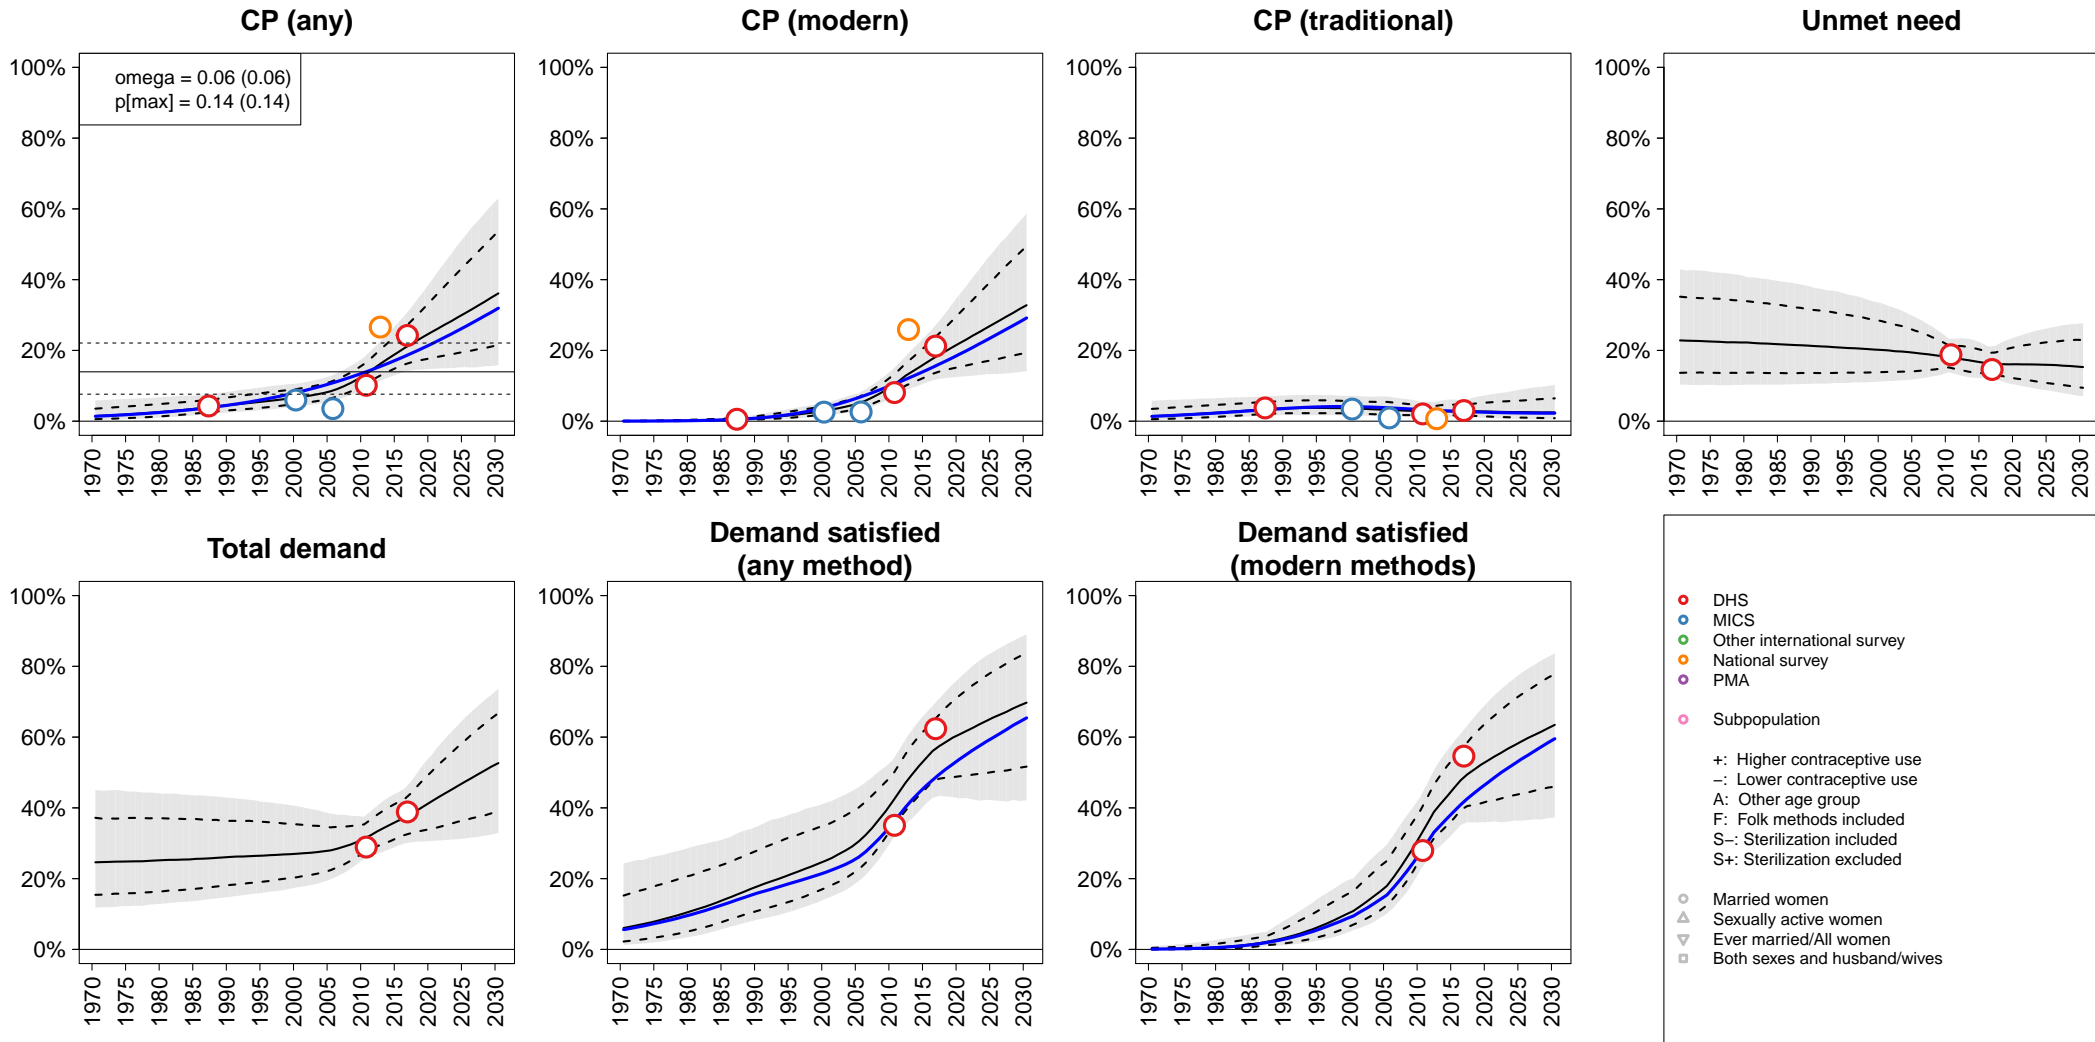

Cabo Verde (Western Africa) --- Married / In-Union

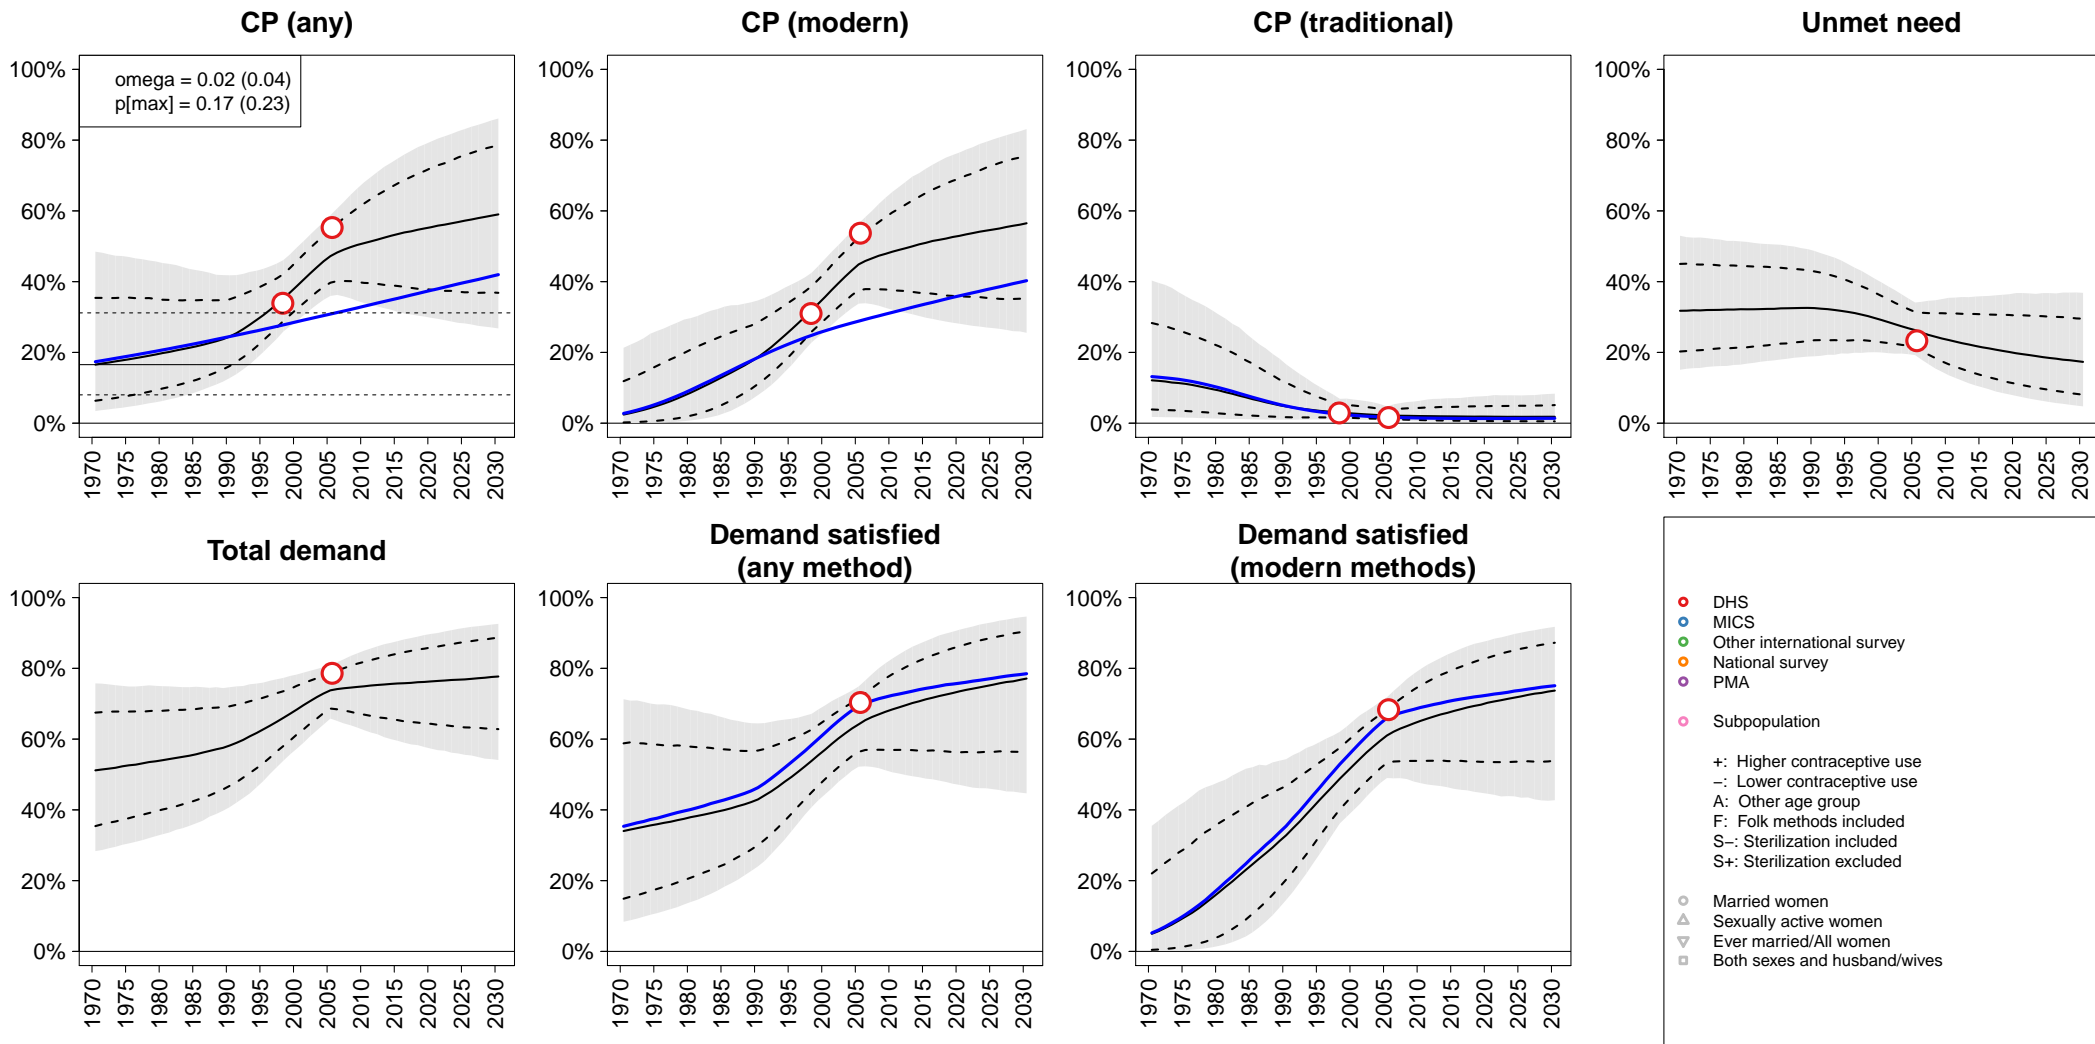

### Cambodia (South-eastern Asia) --- Married / In-Union

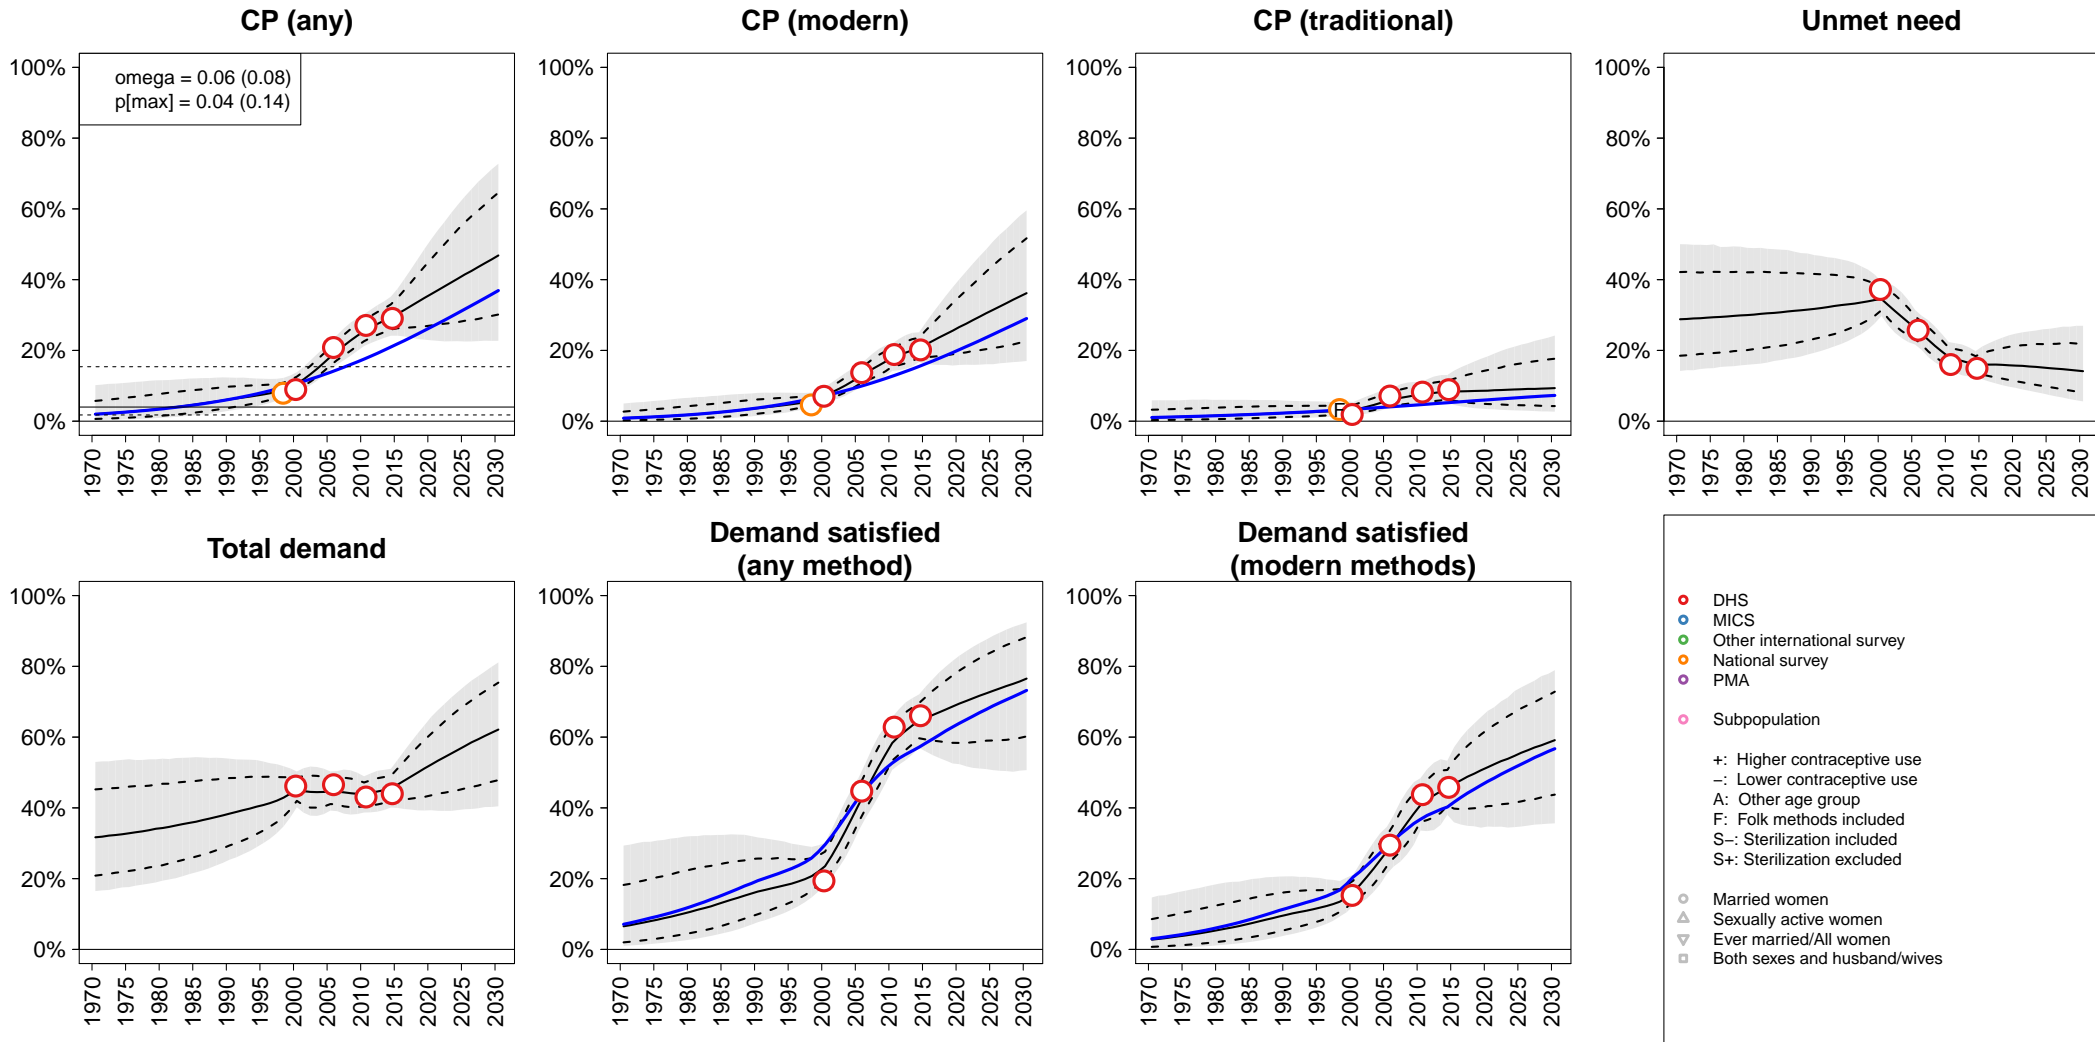

Cameroon (Middle Africa) --- Married / In-Union

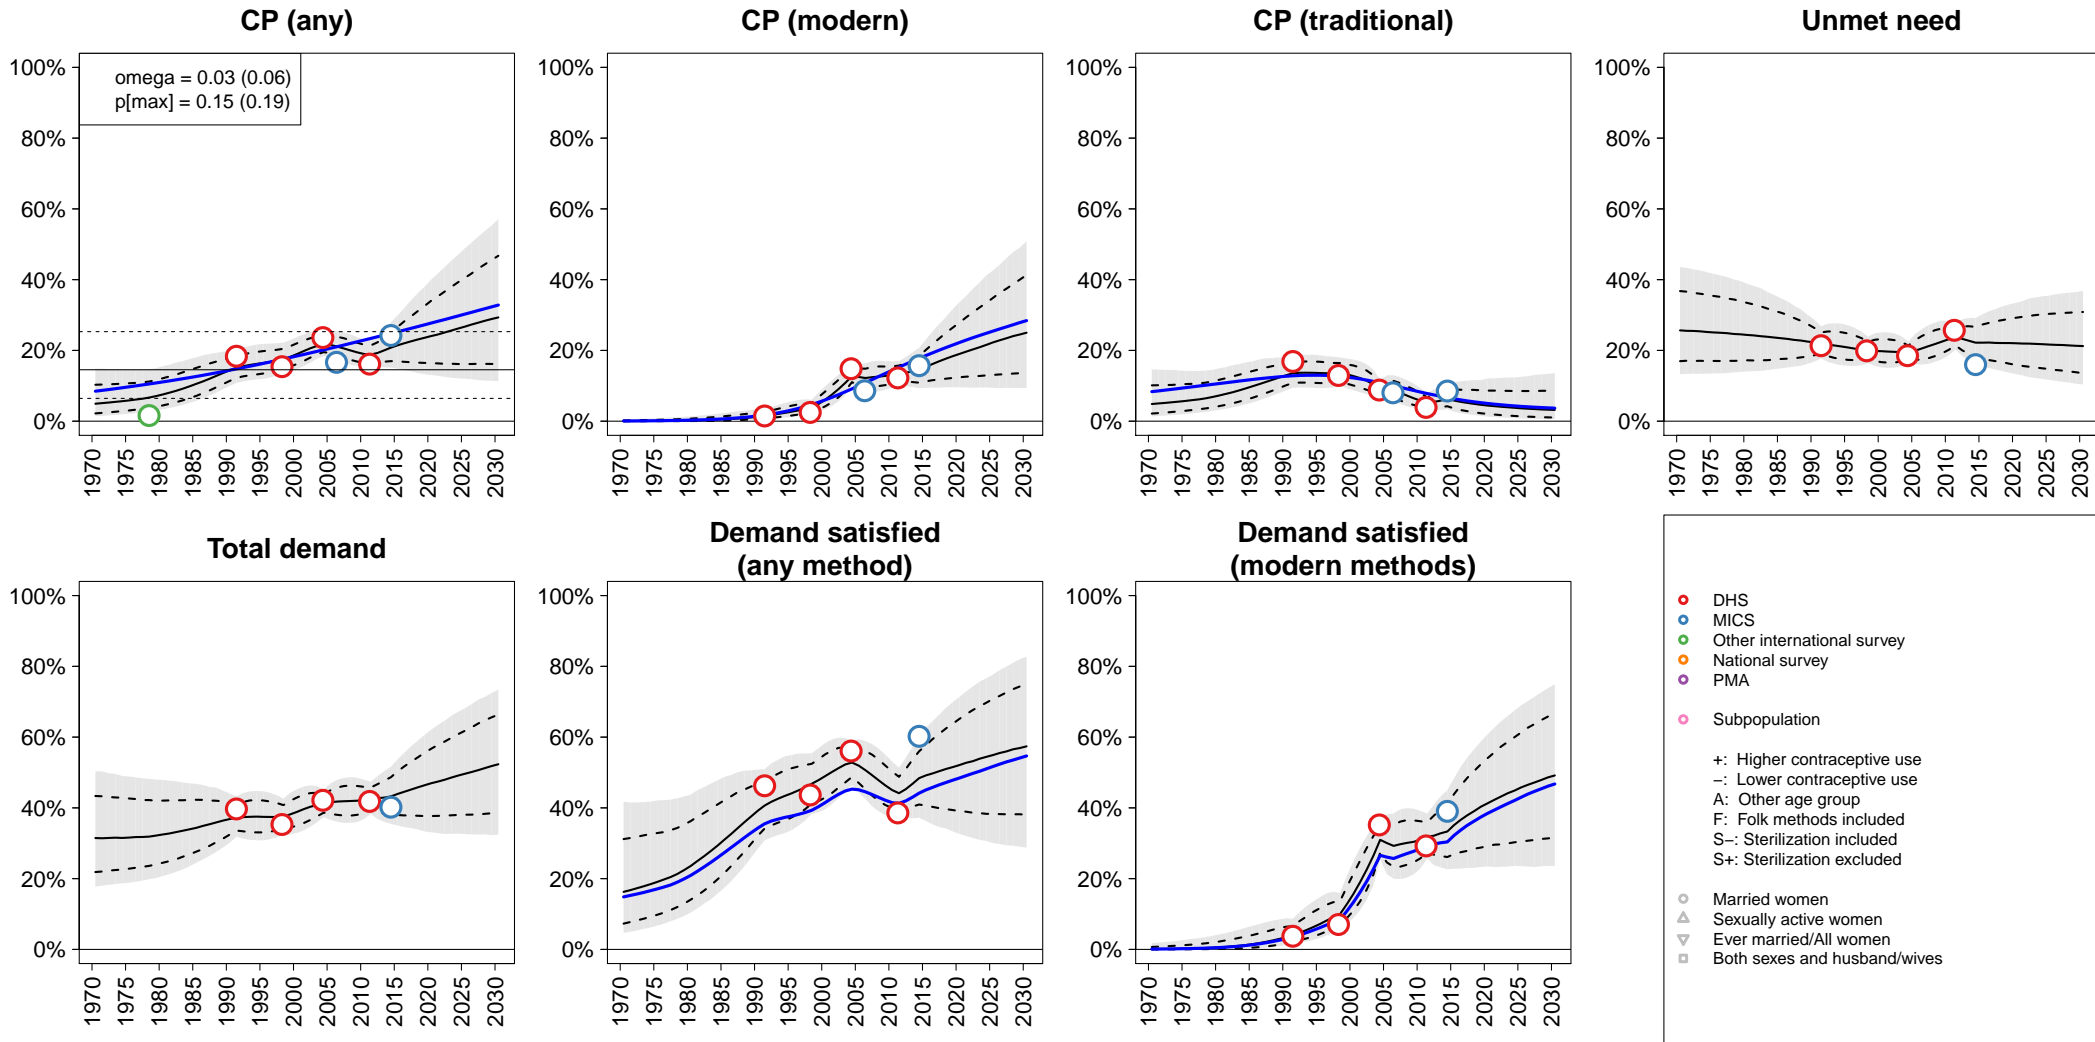

Central African Republic (Middle Africa) --- Married / In-Union

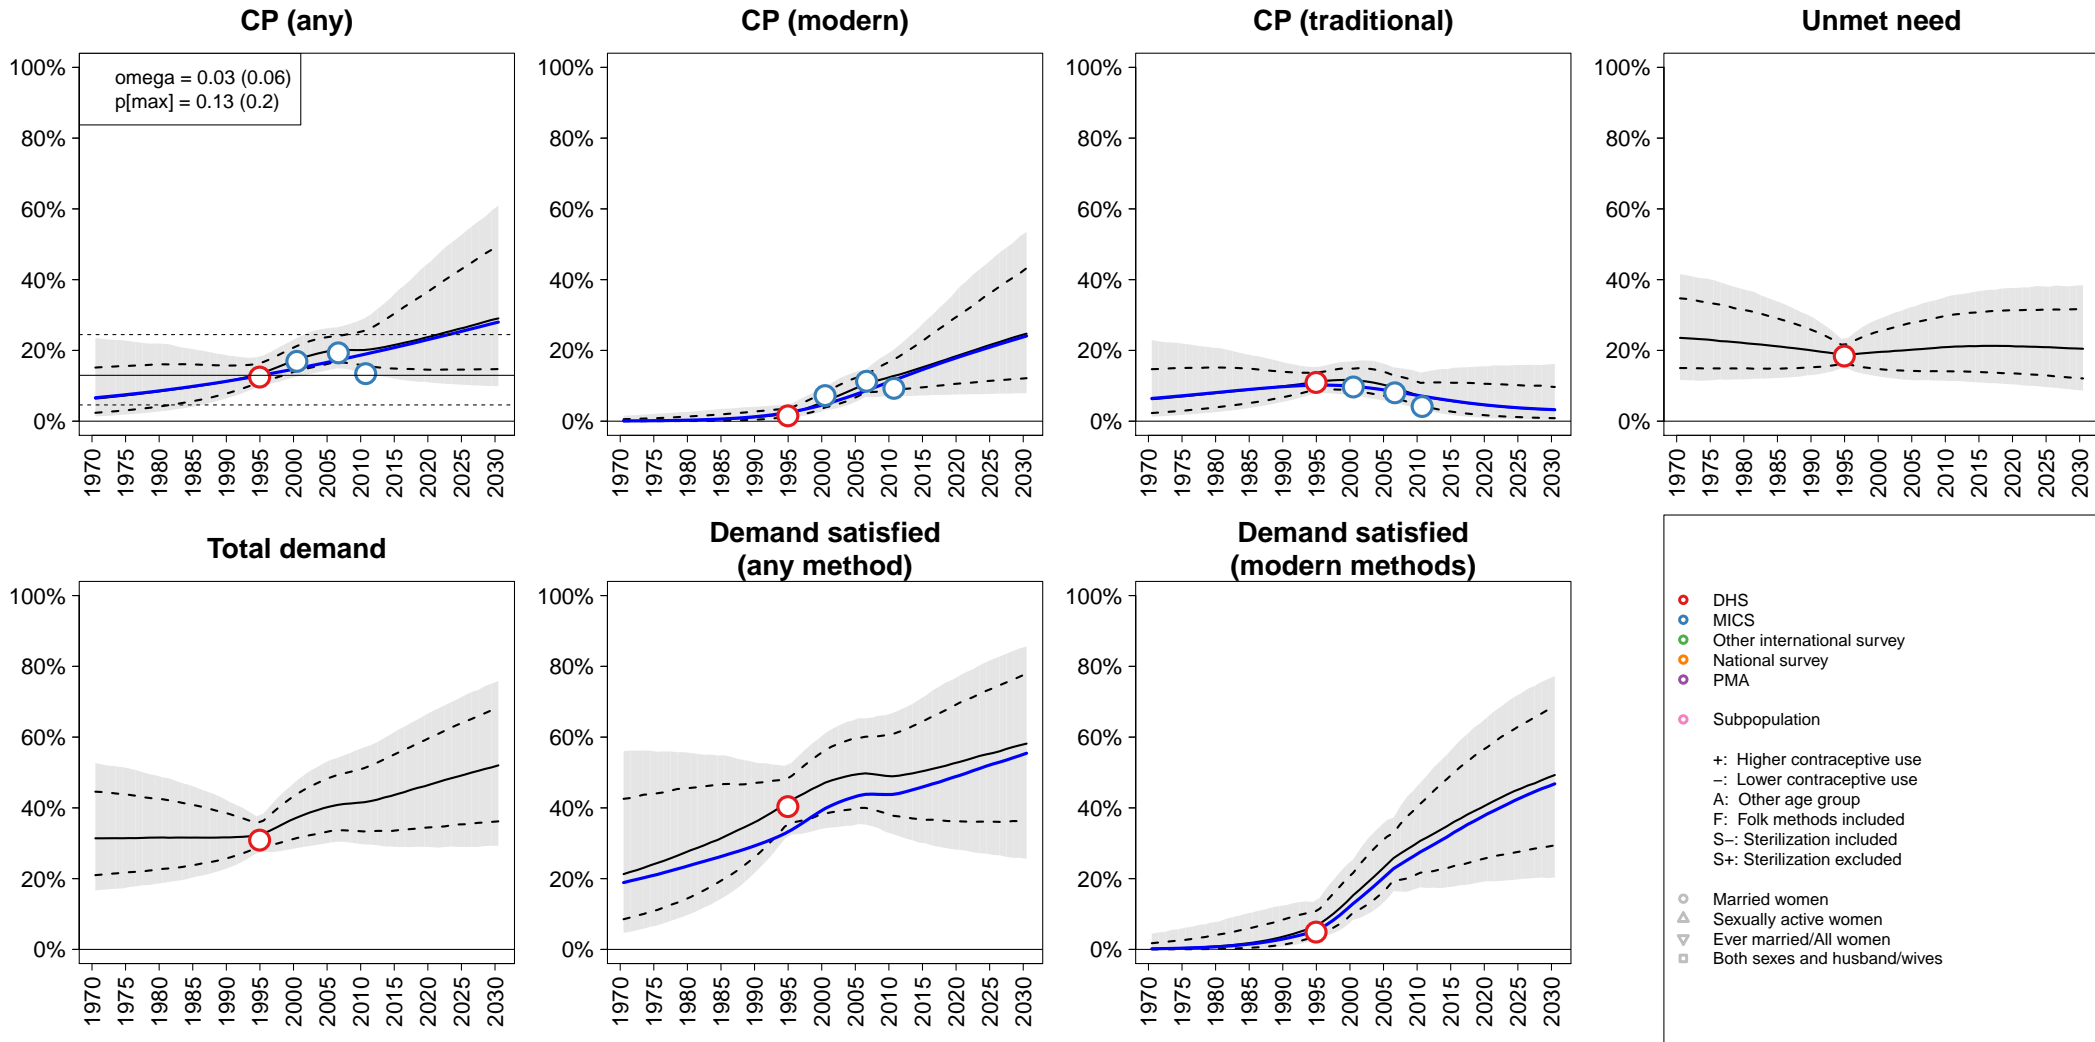

Chad (Middle Africa) ---- Married / In-Union

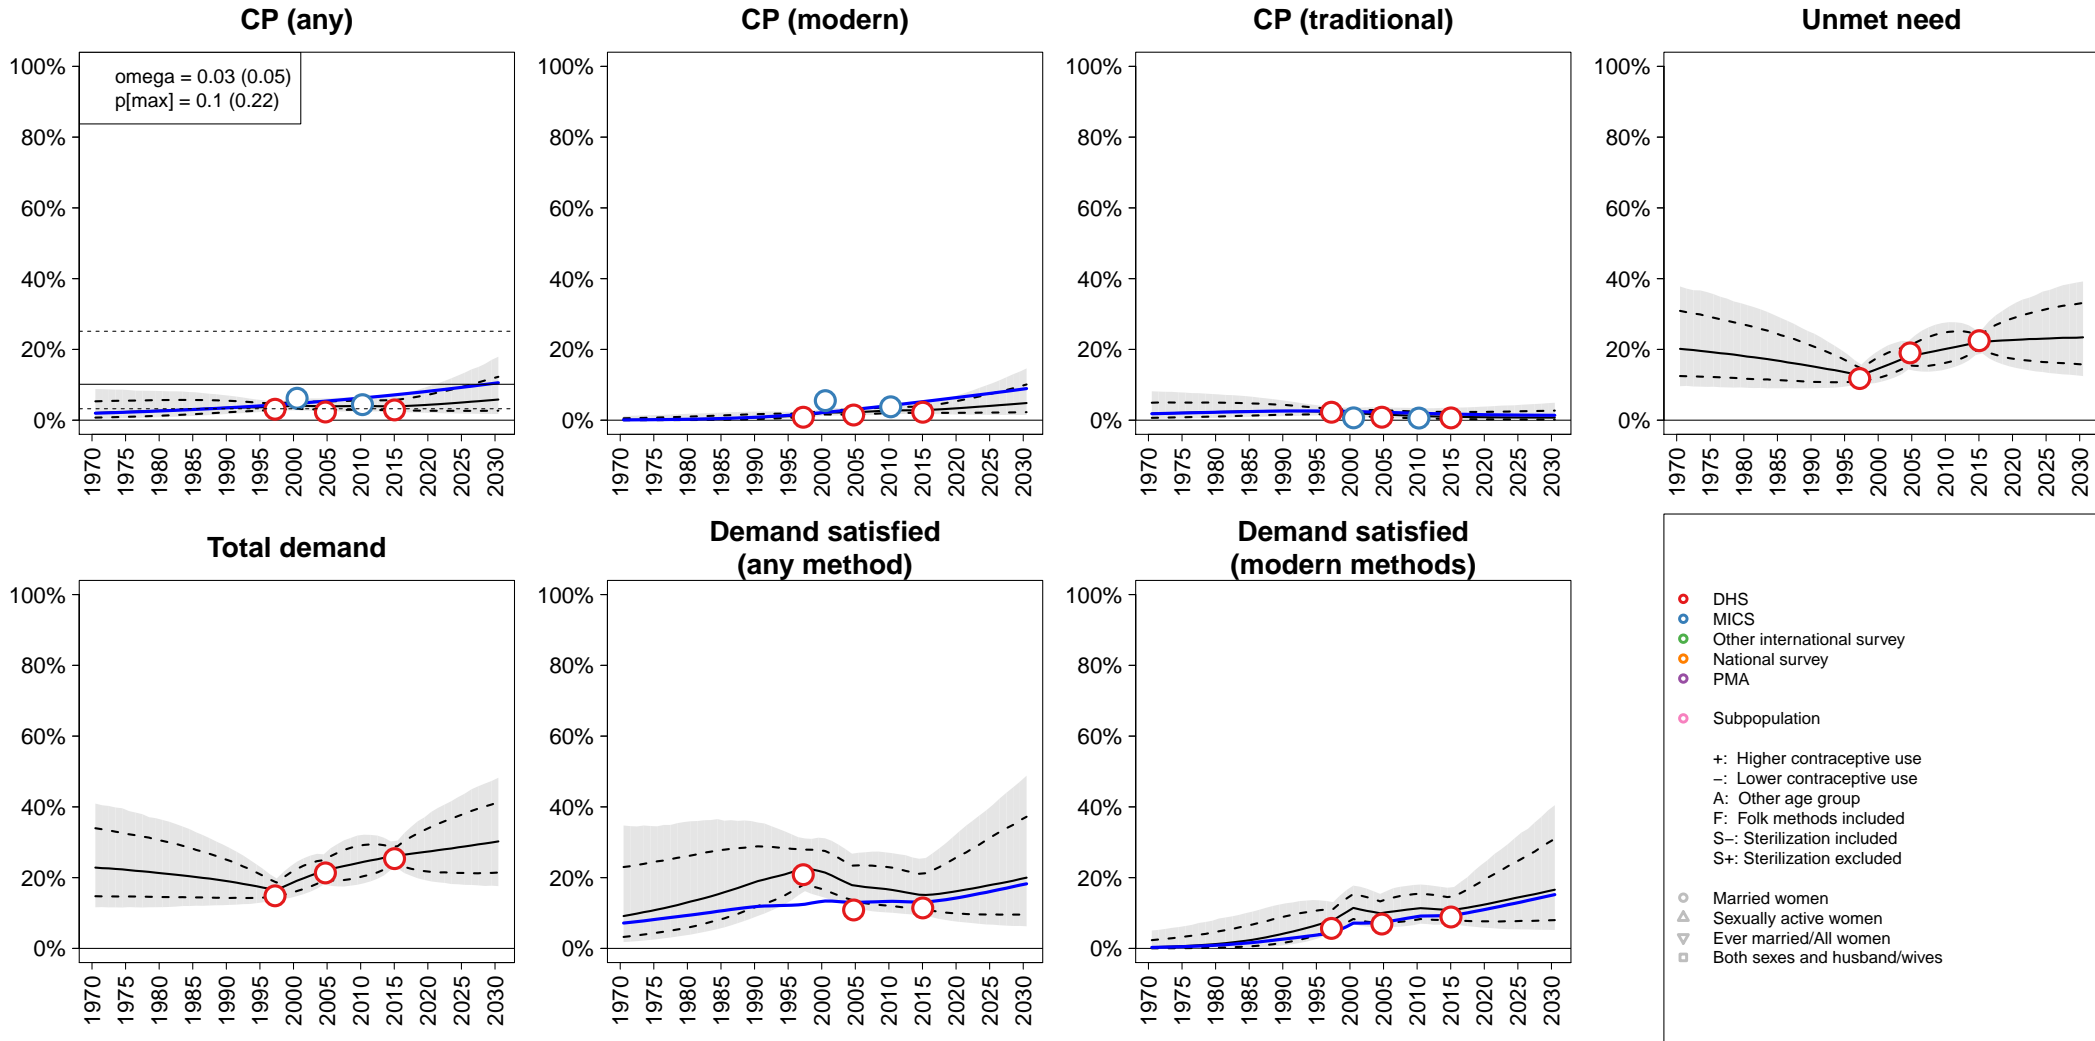

China (Eastern Asia) --- Married / In-Union

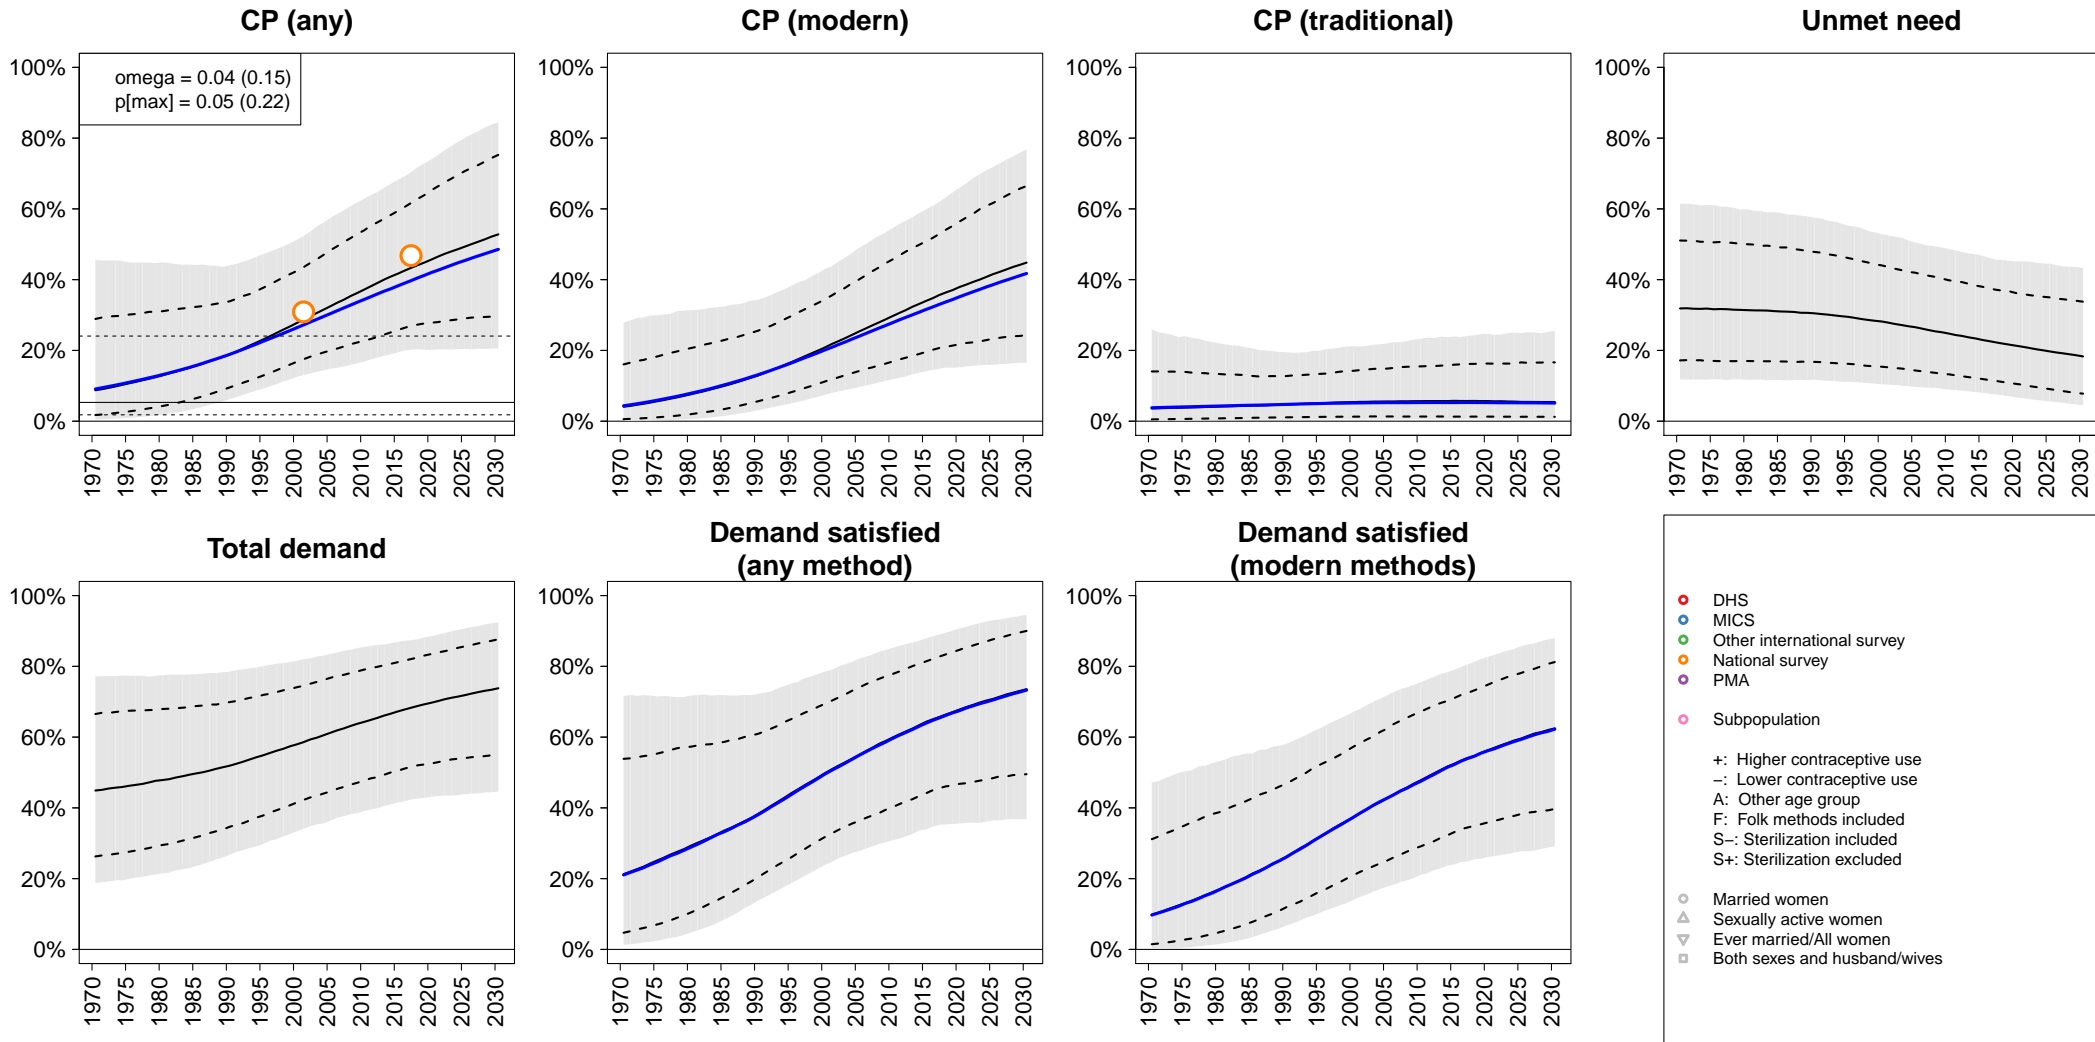

Colombia (South America) --- Married / In-Union

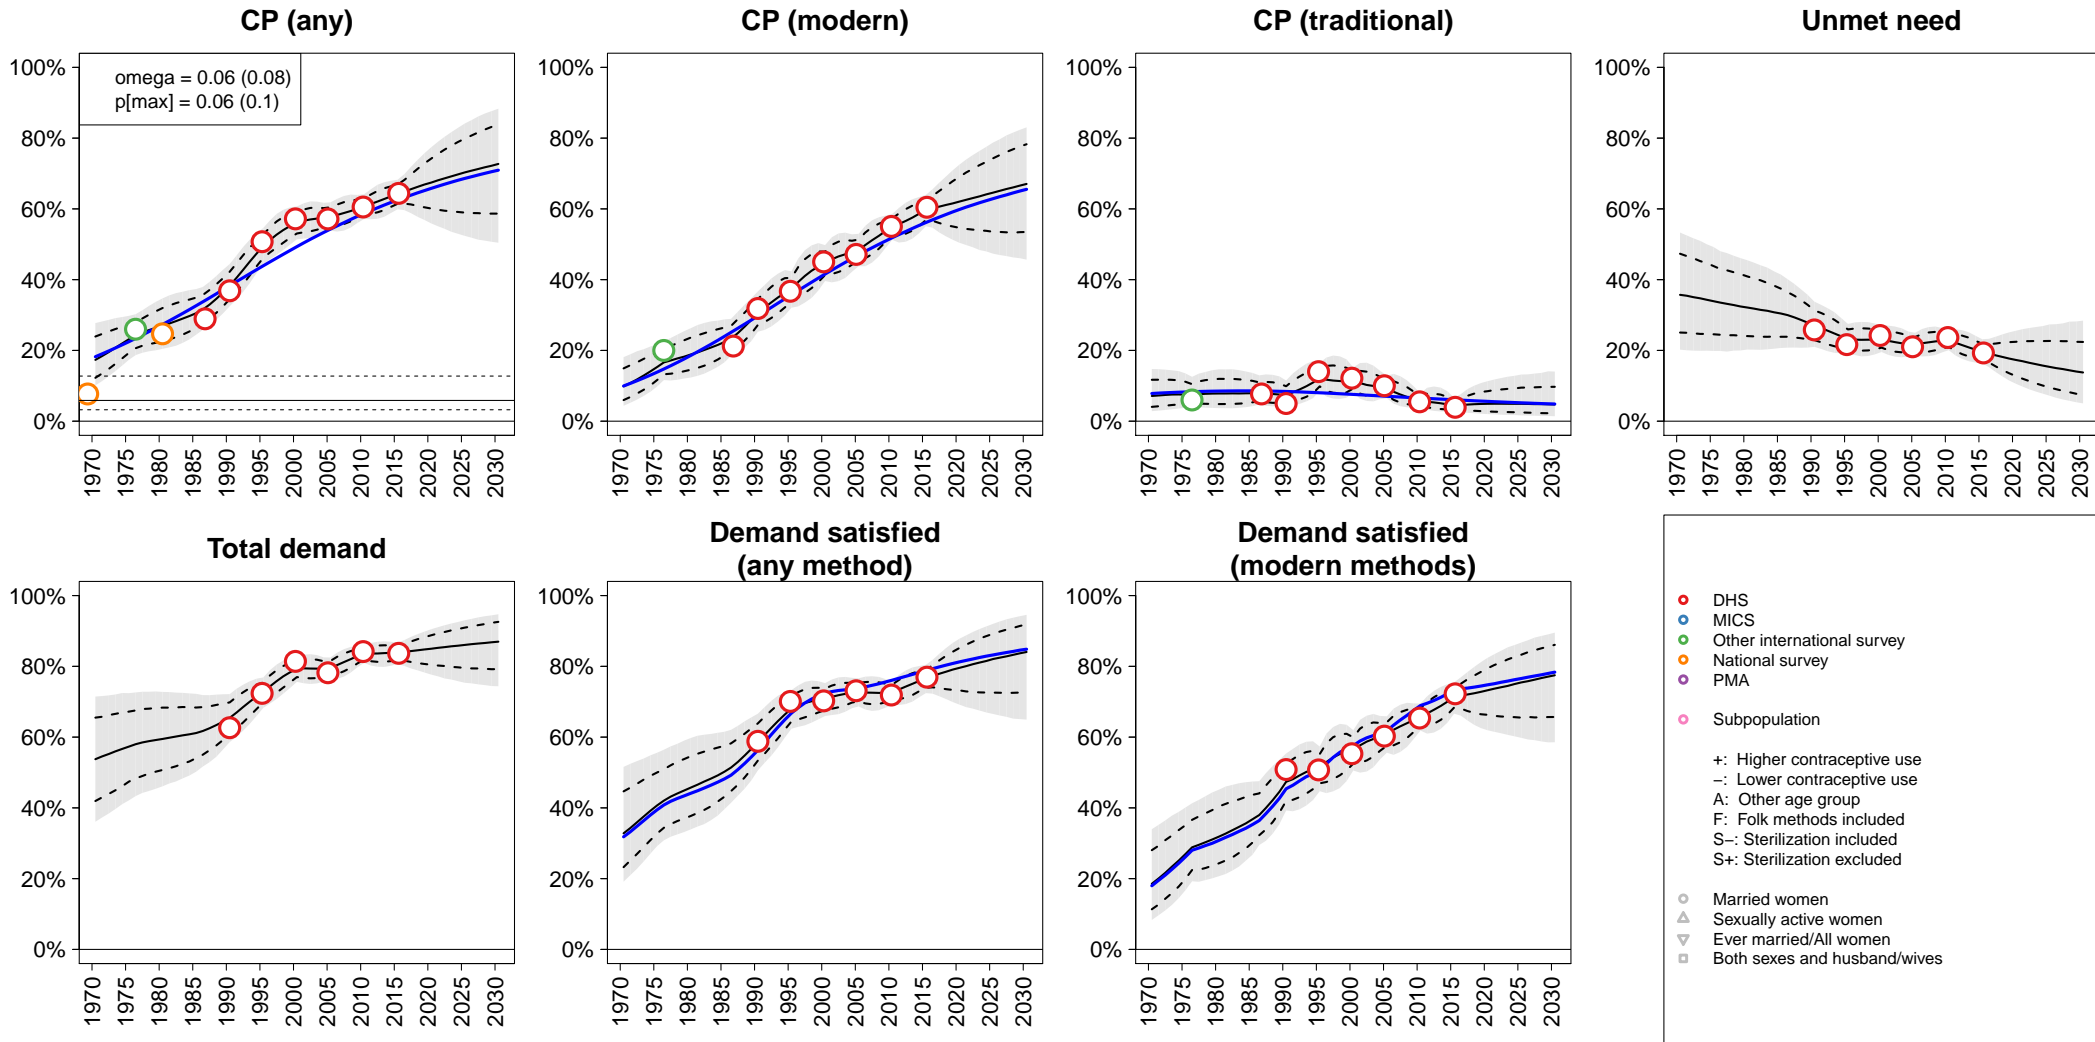



Comoros (Eastern Africa) --- Married / In-Union

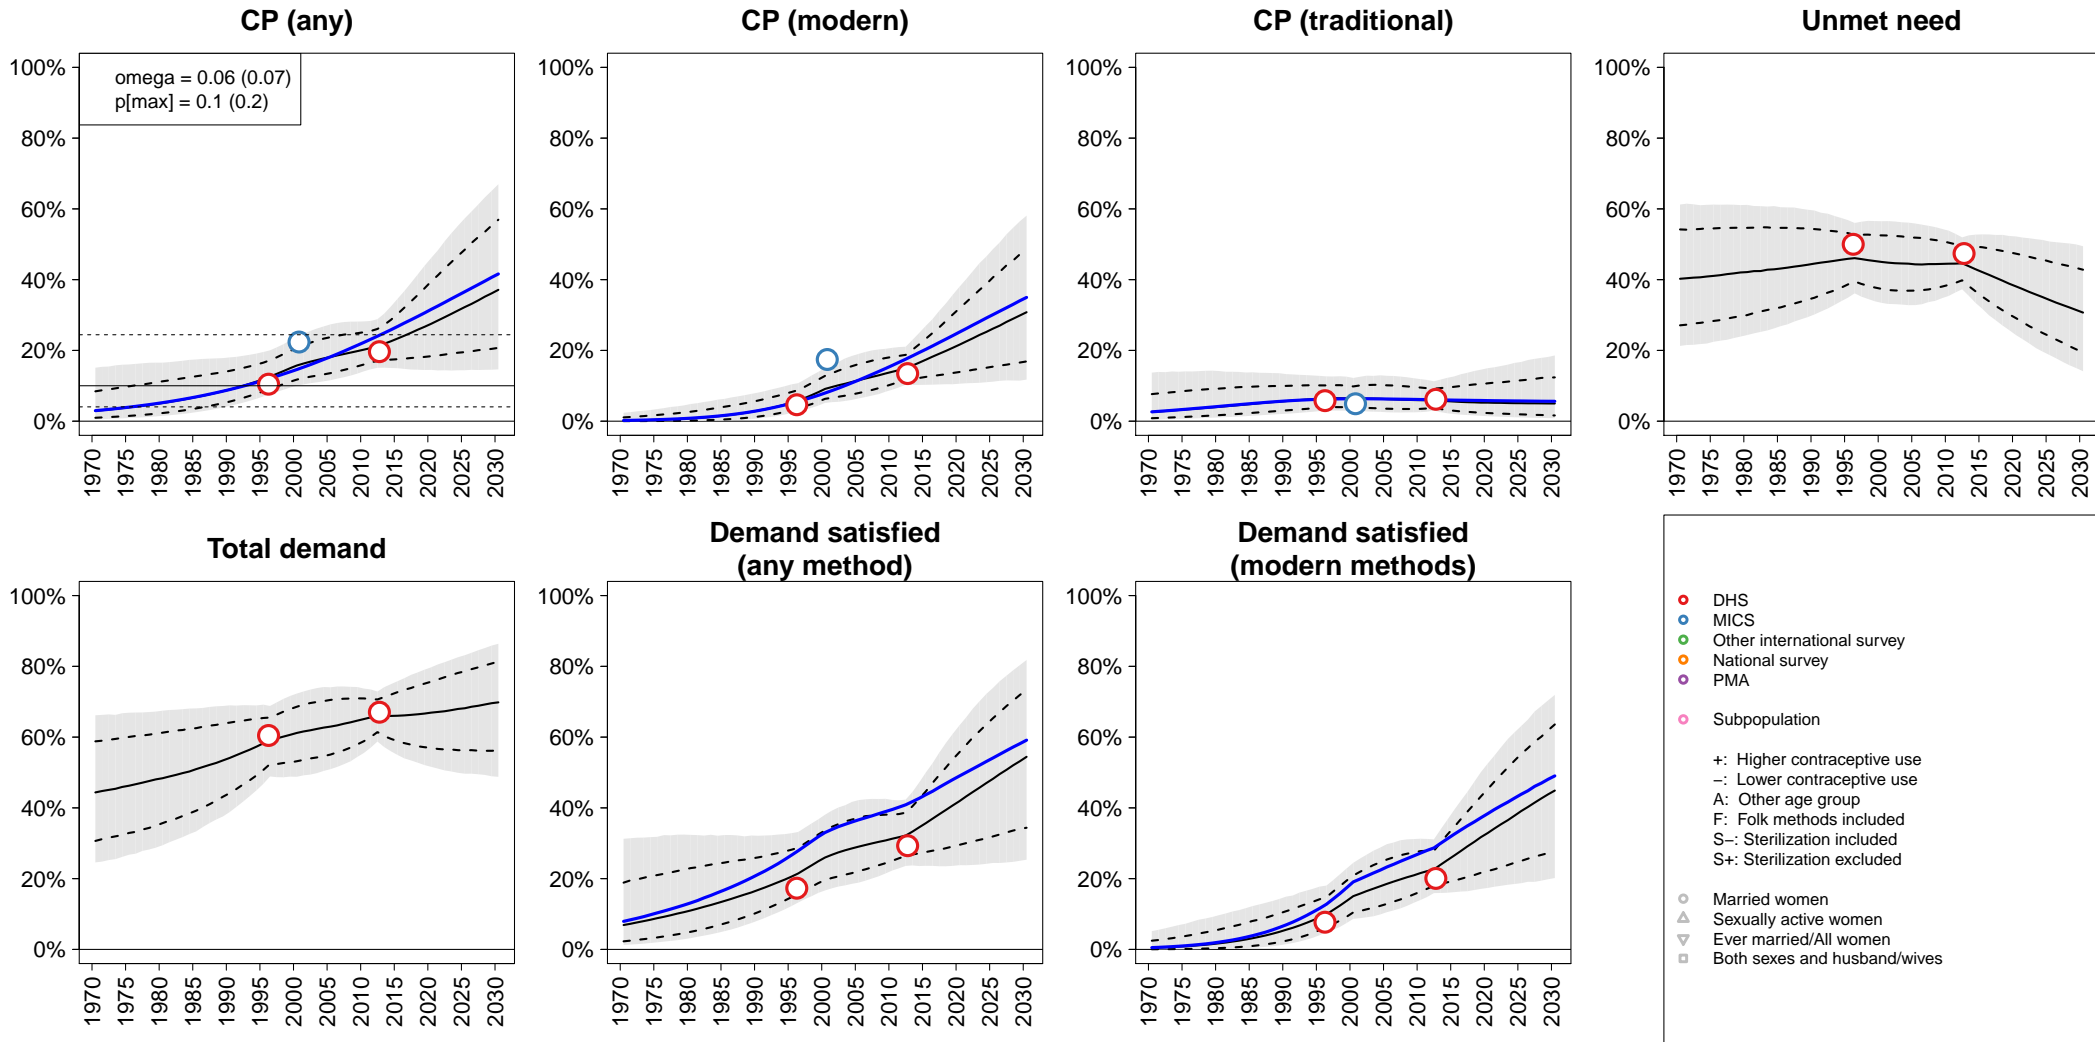

Congo (Middle Africa) --- Married / In-Union

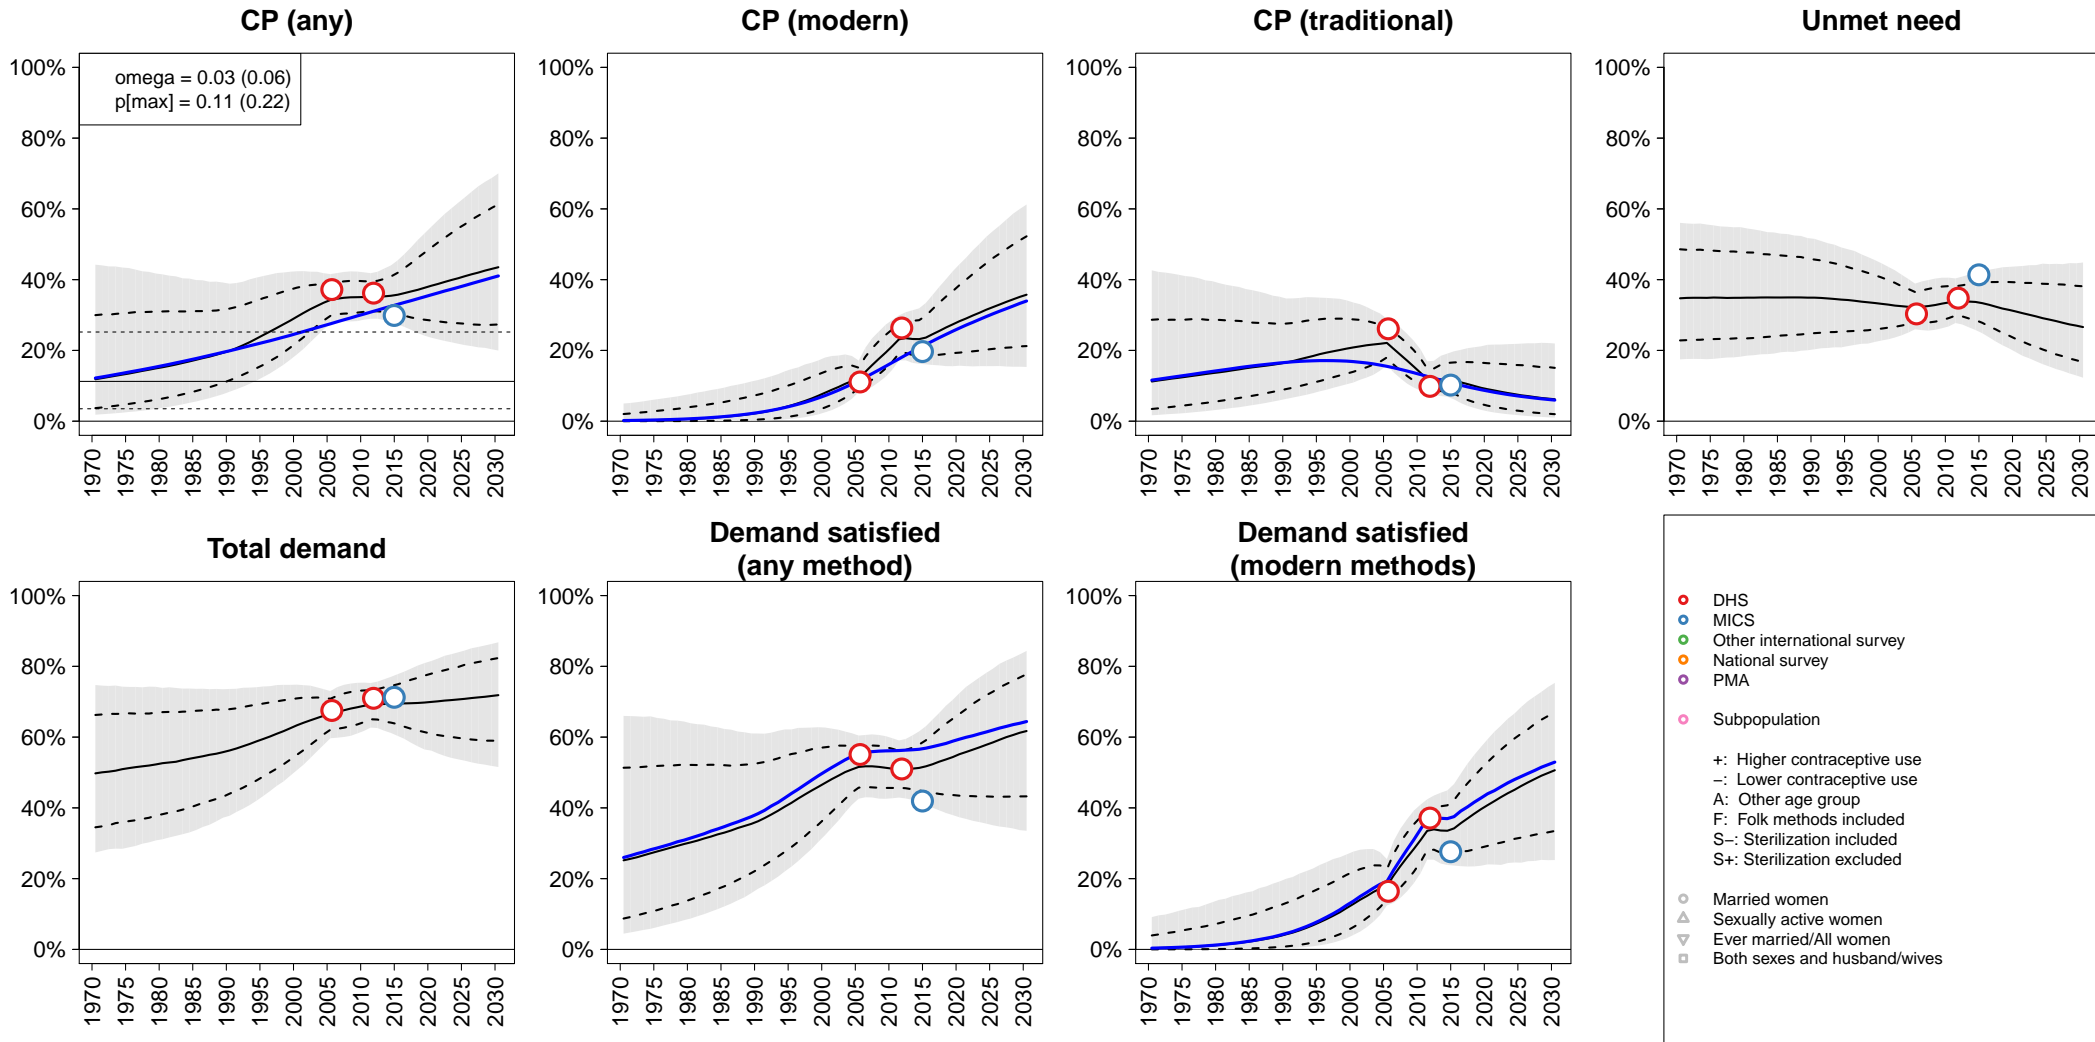

Costa Rica (Central America) --- Married / In-Union

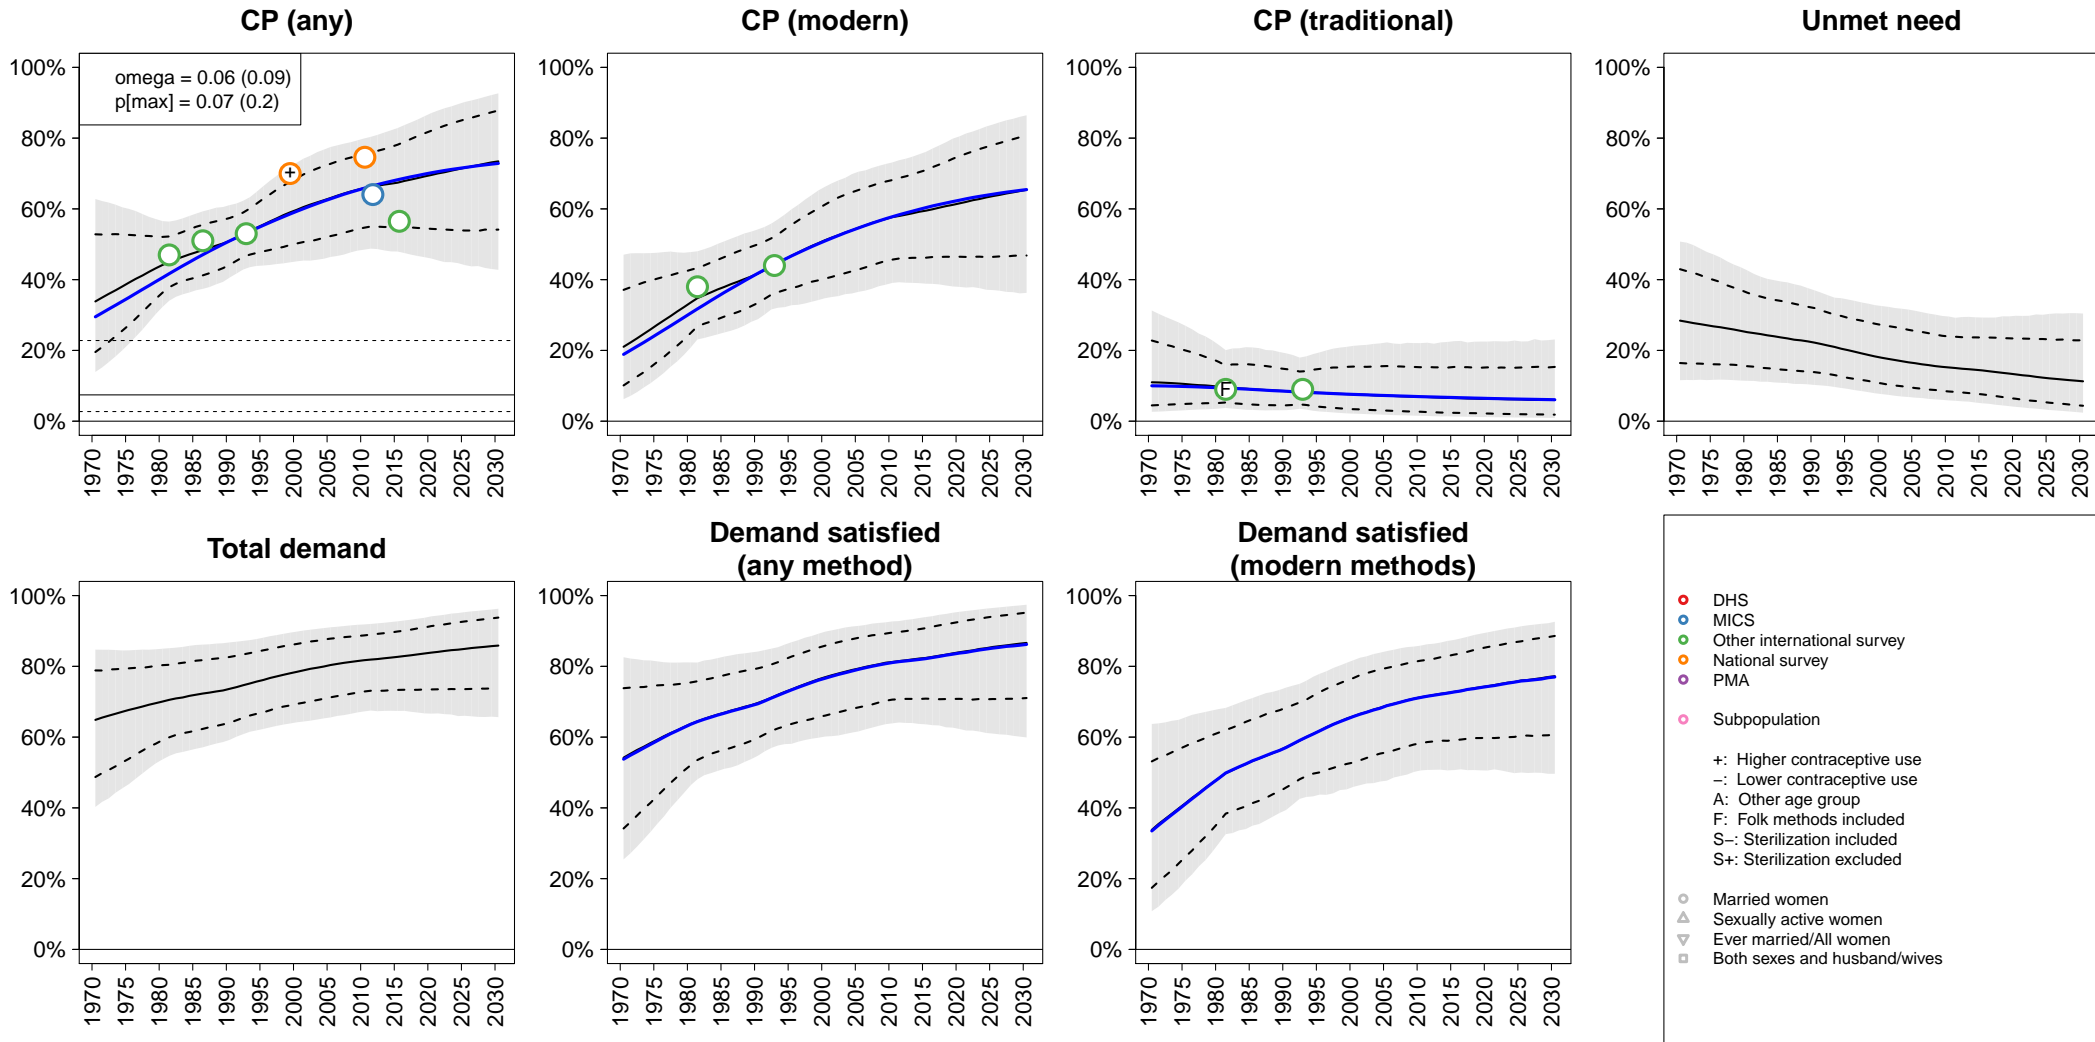

Côte d'Ivoire (Western Africa) --- Married / In-Union

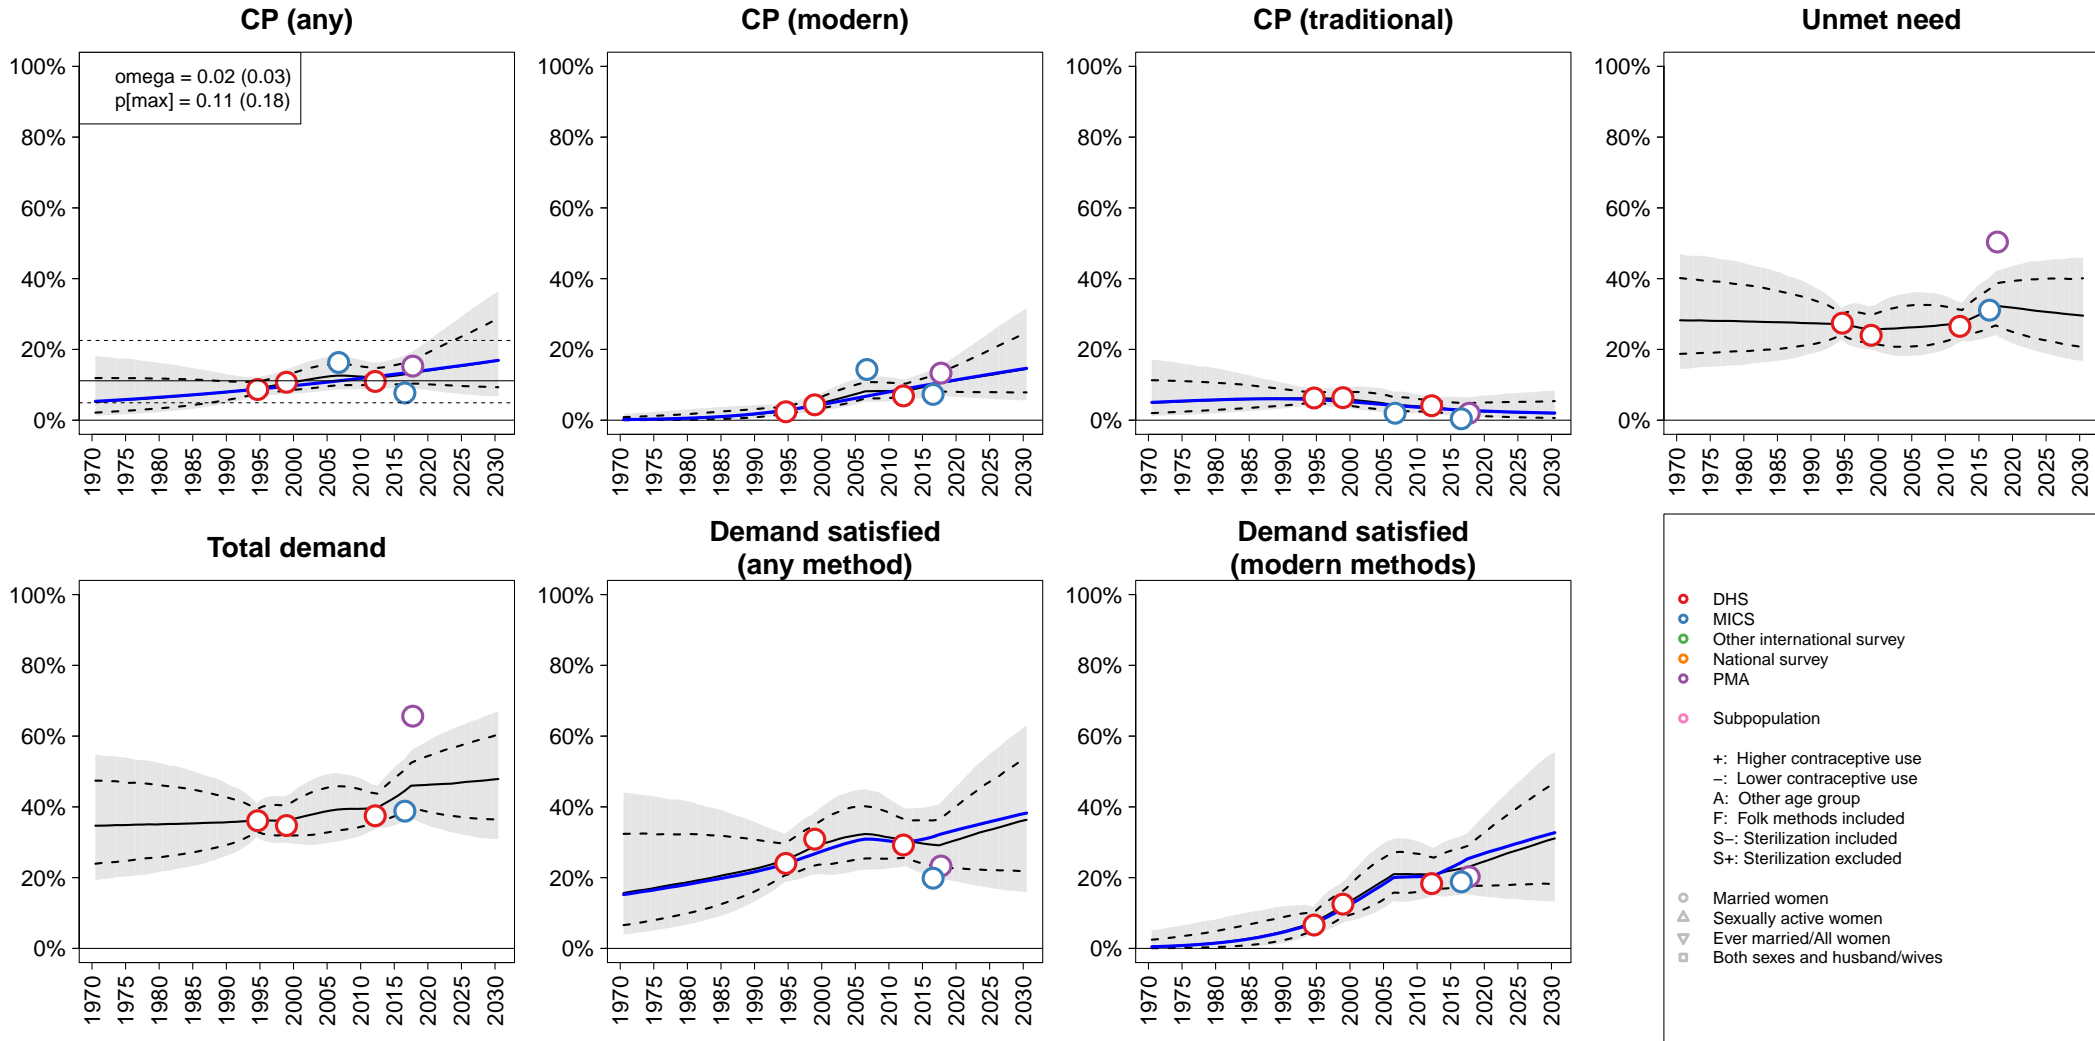

Cuba (Caribbean) --- Married / In-Union

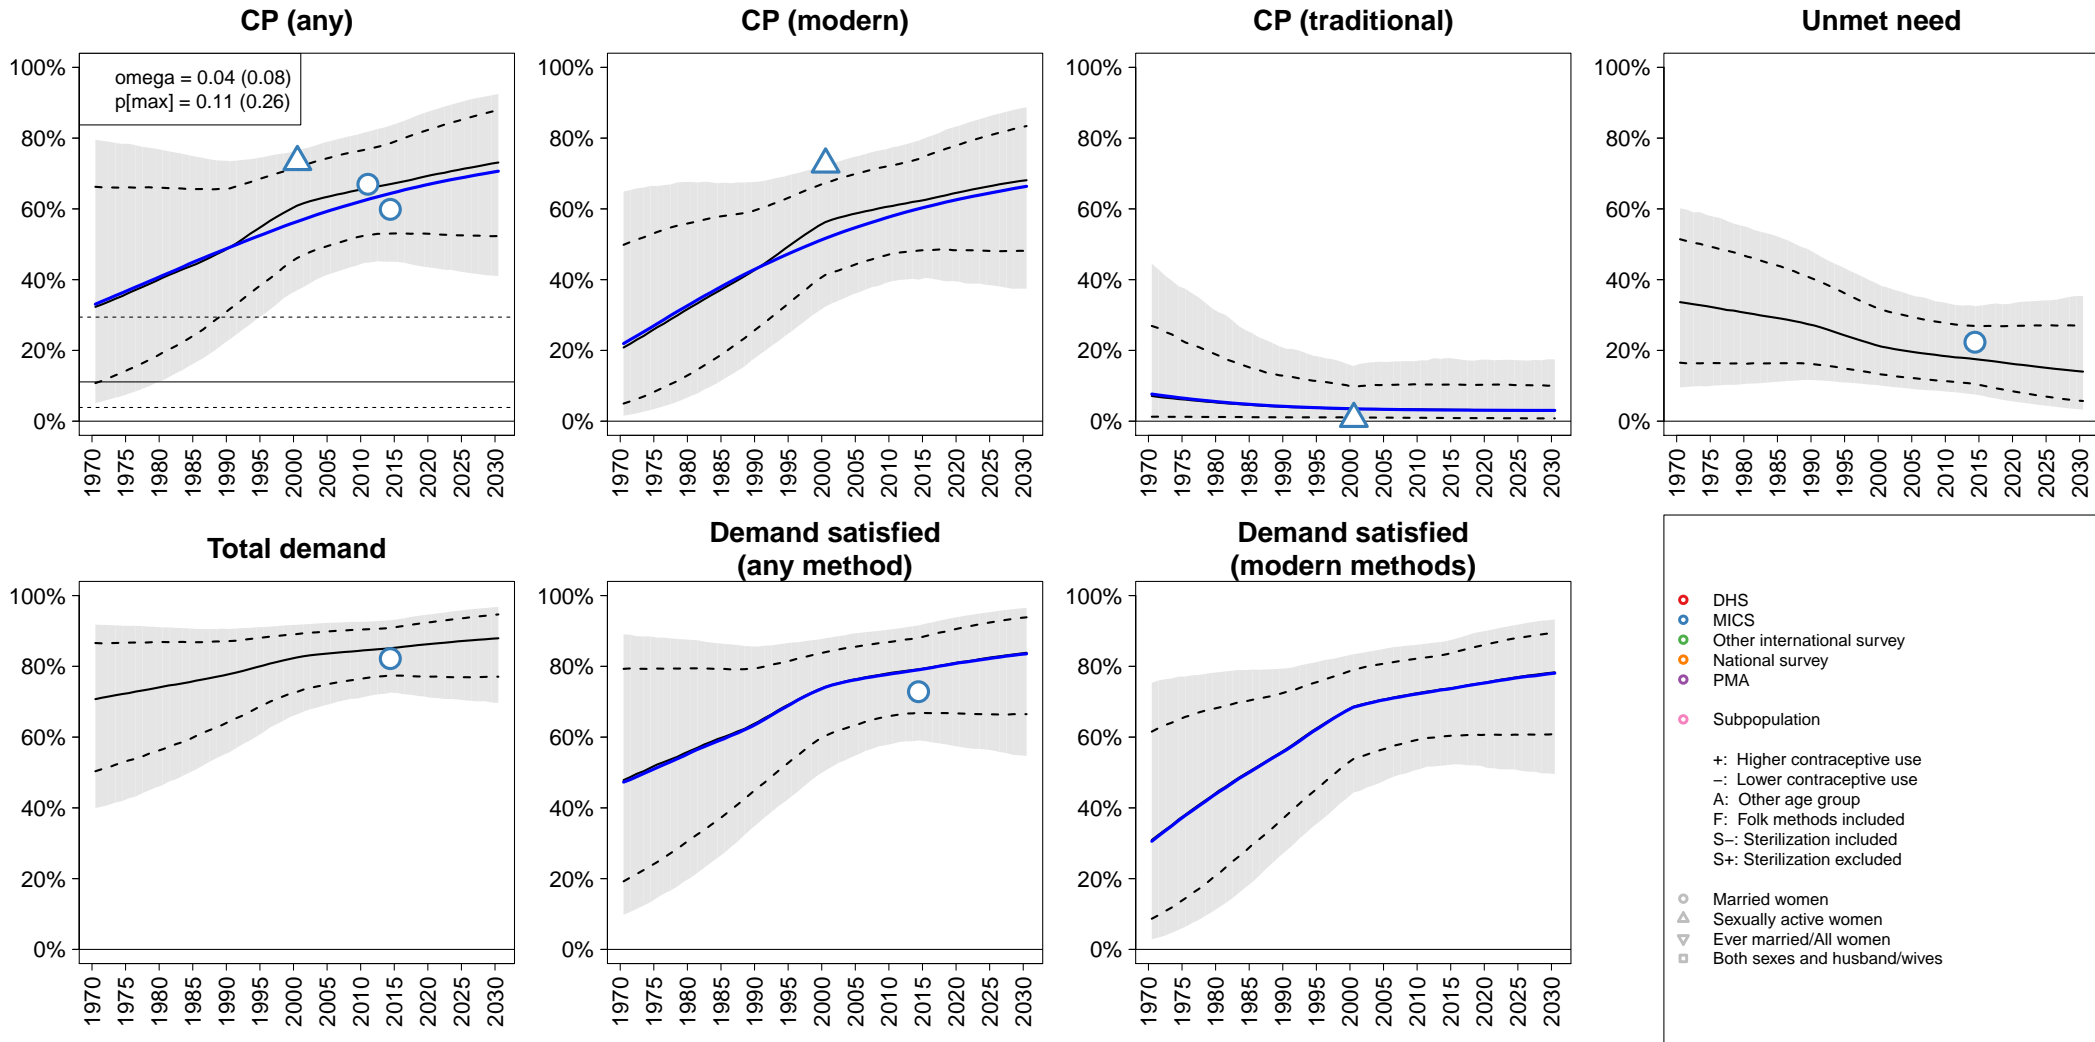

Czechia (Eastern Europe) --- Married / In-Union

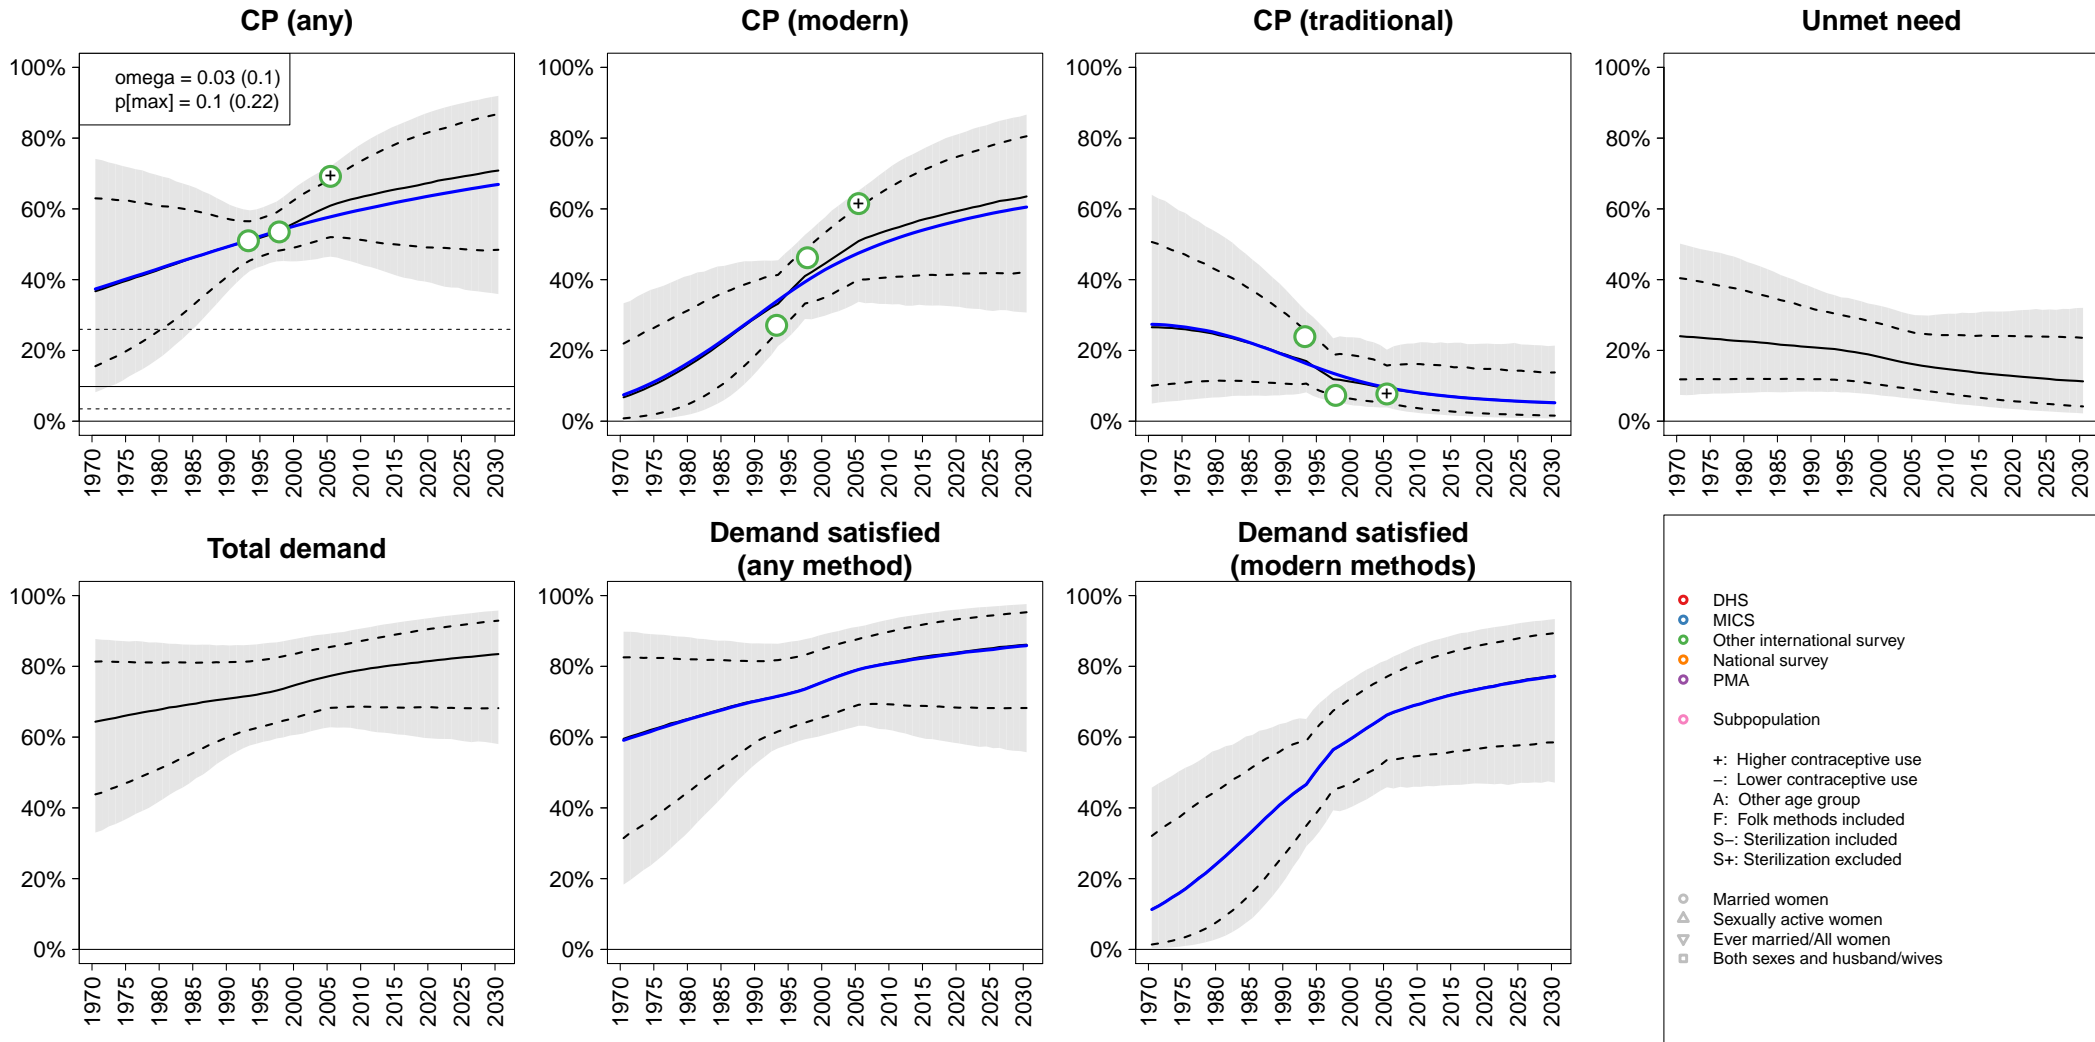

Democratic Rep. of the Congo (Middle Africa) --- Married / In-Union

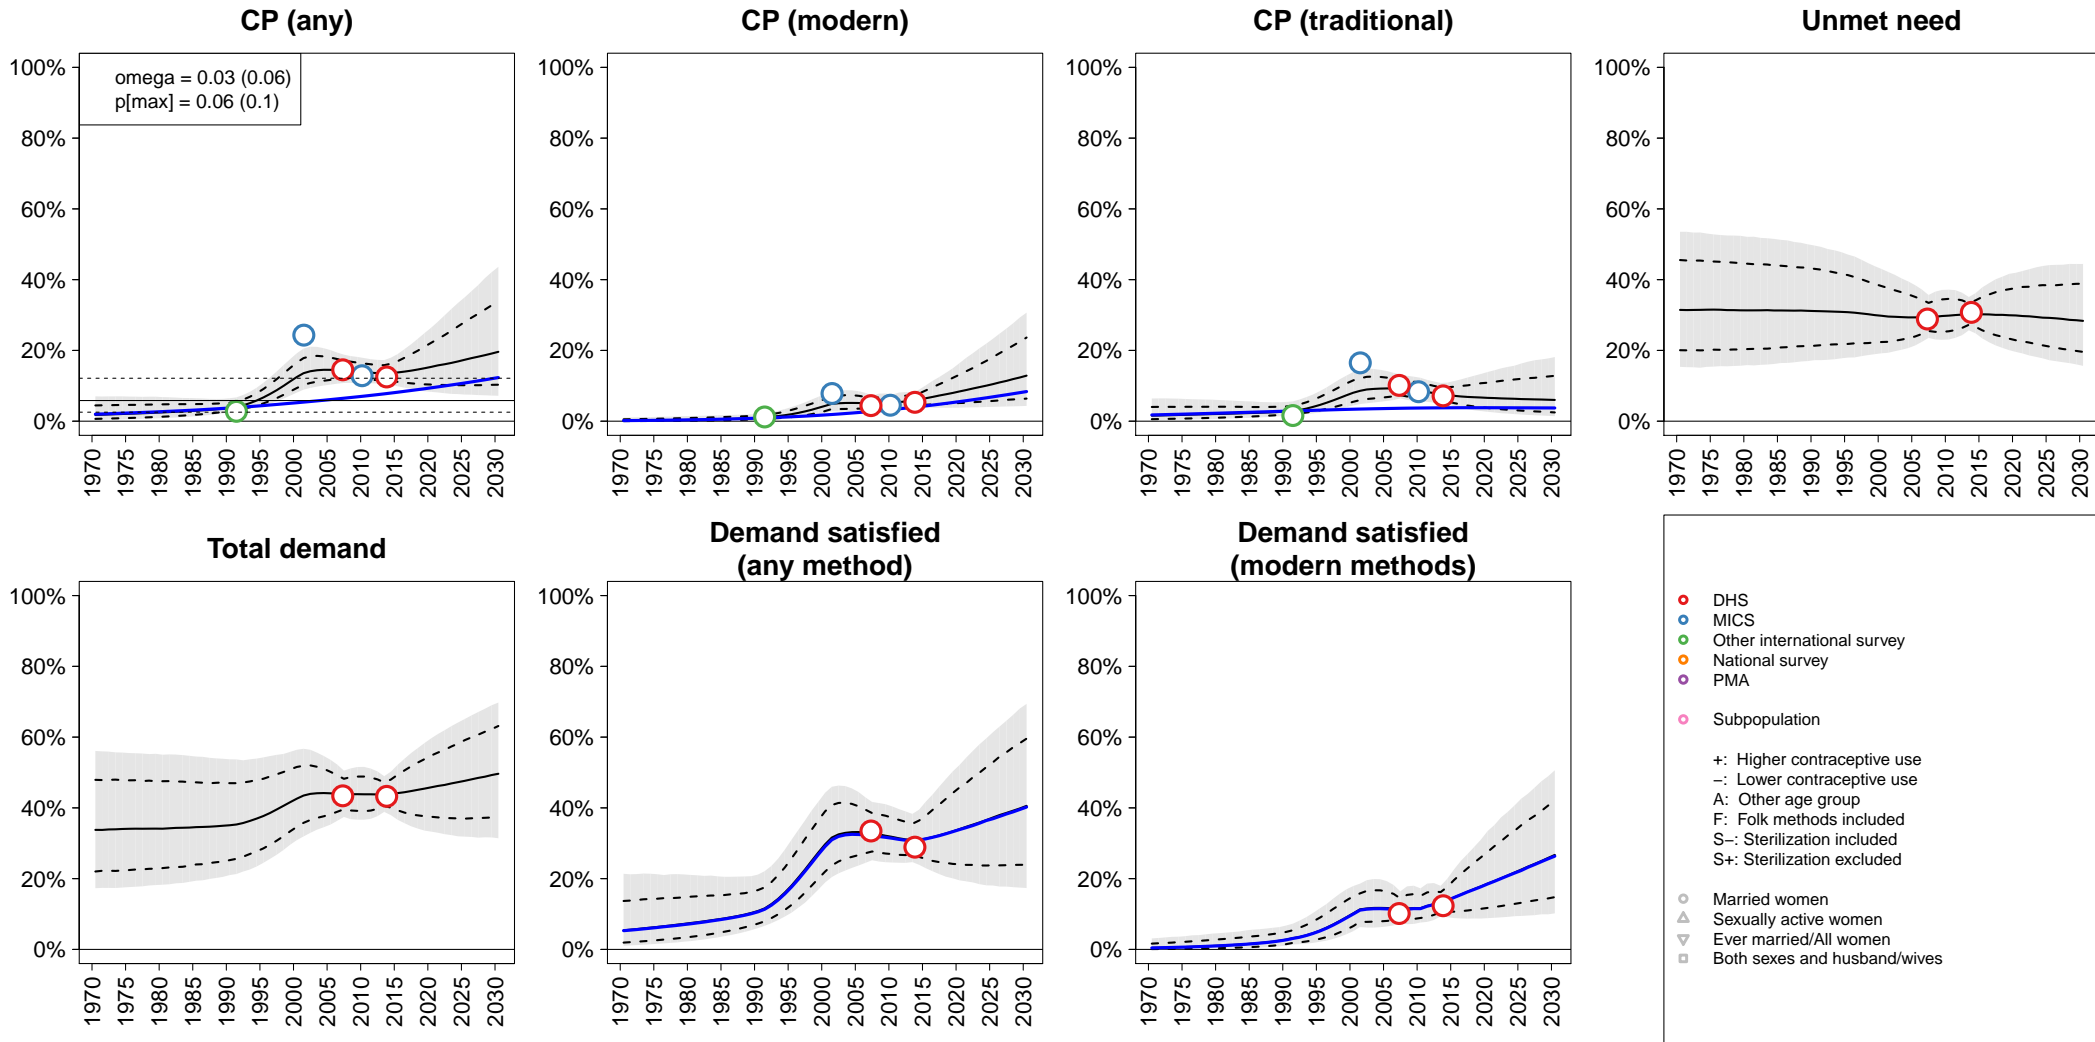

Democratic Republic of Timor-Leste (South-eastern Asia) --- Married / In-Union

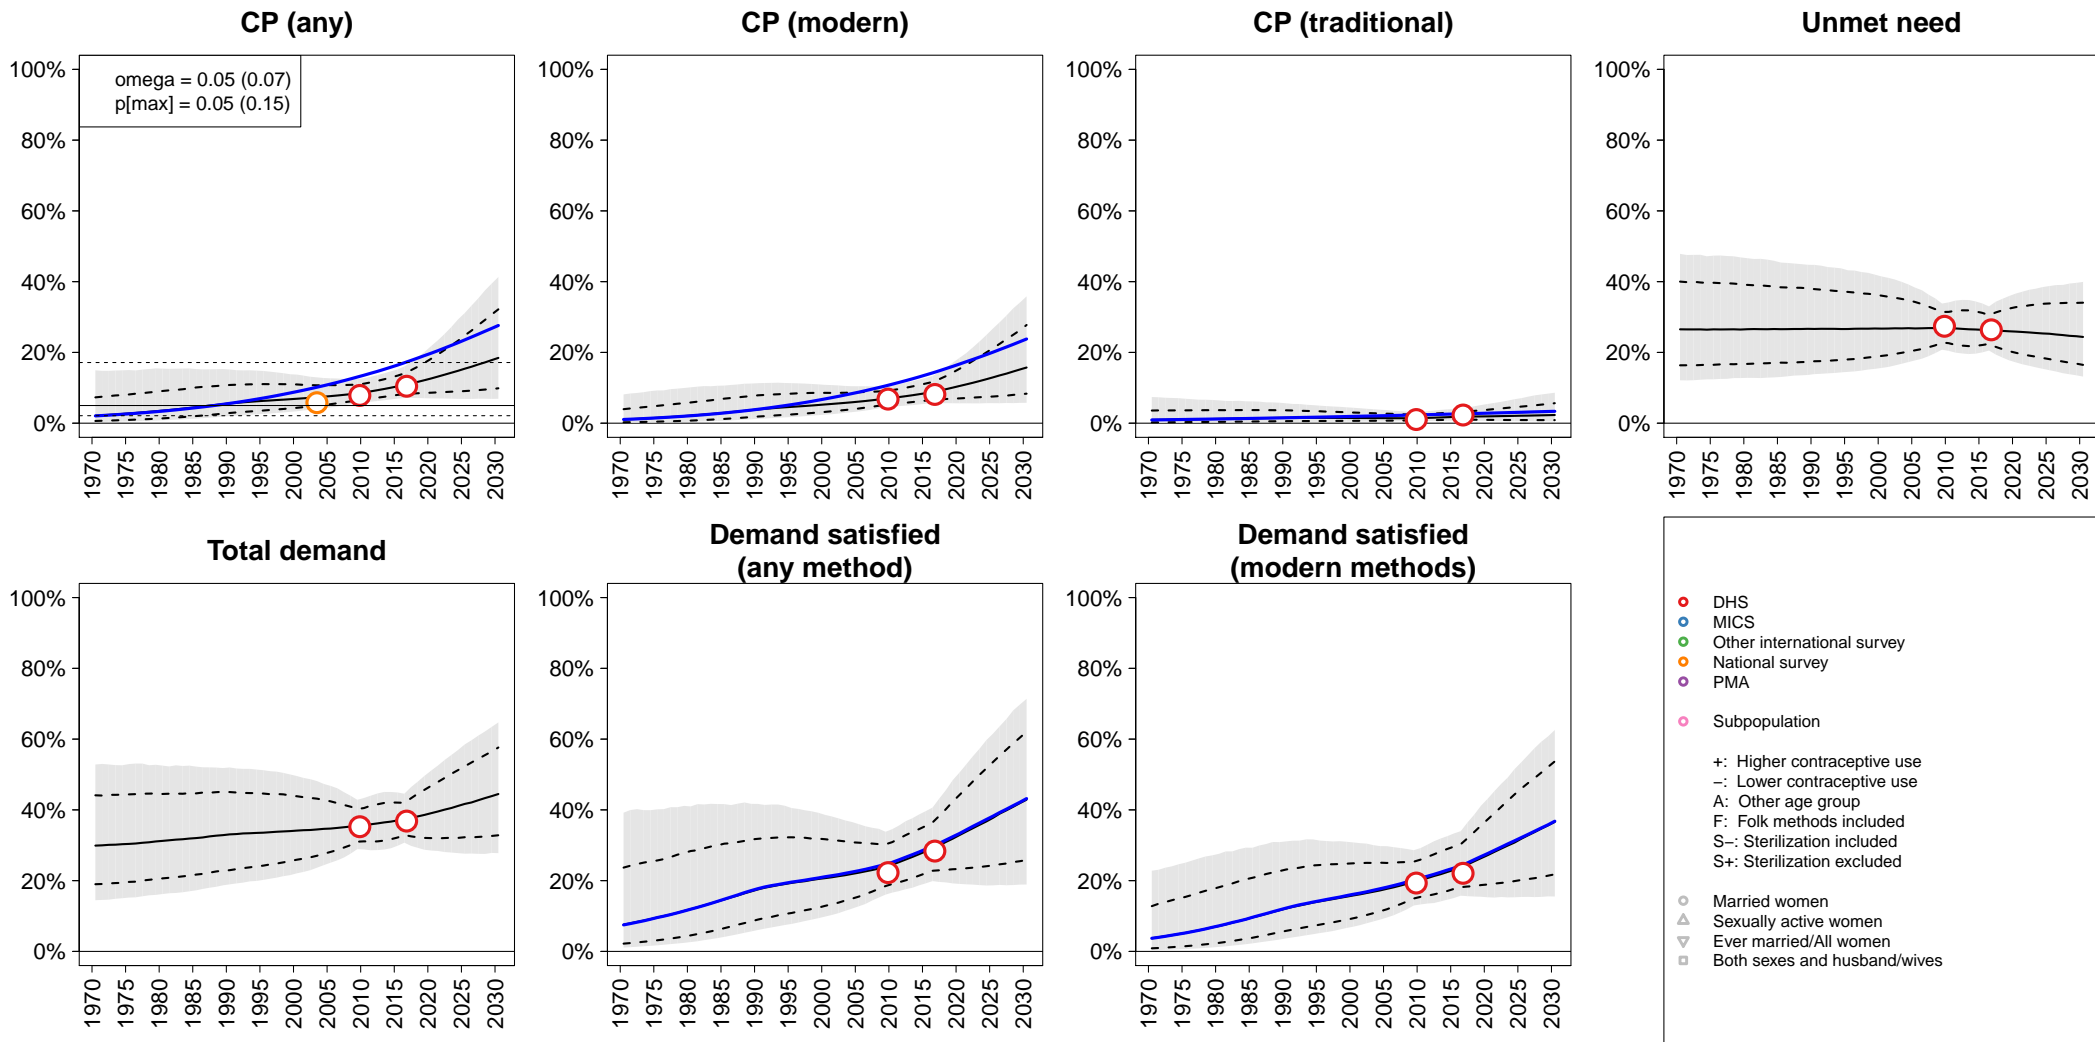



Djibouti (Eastern Africa) --- Married / In-Union

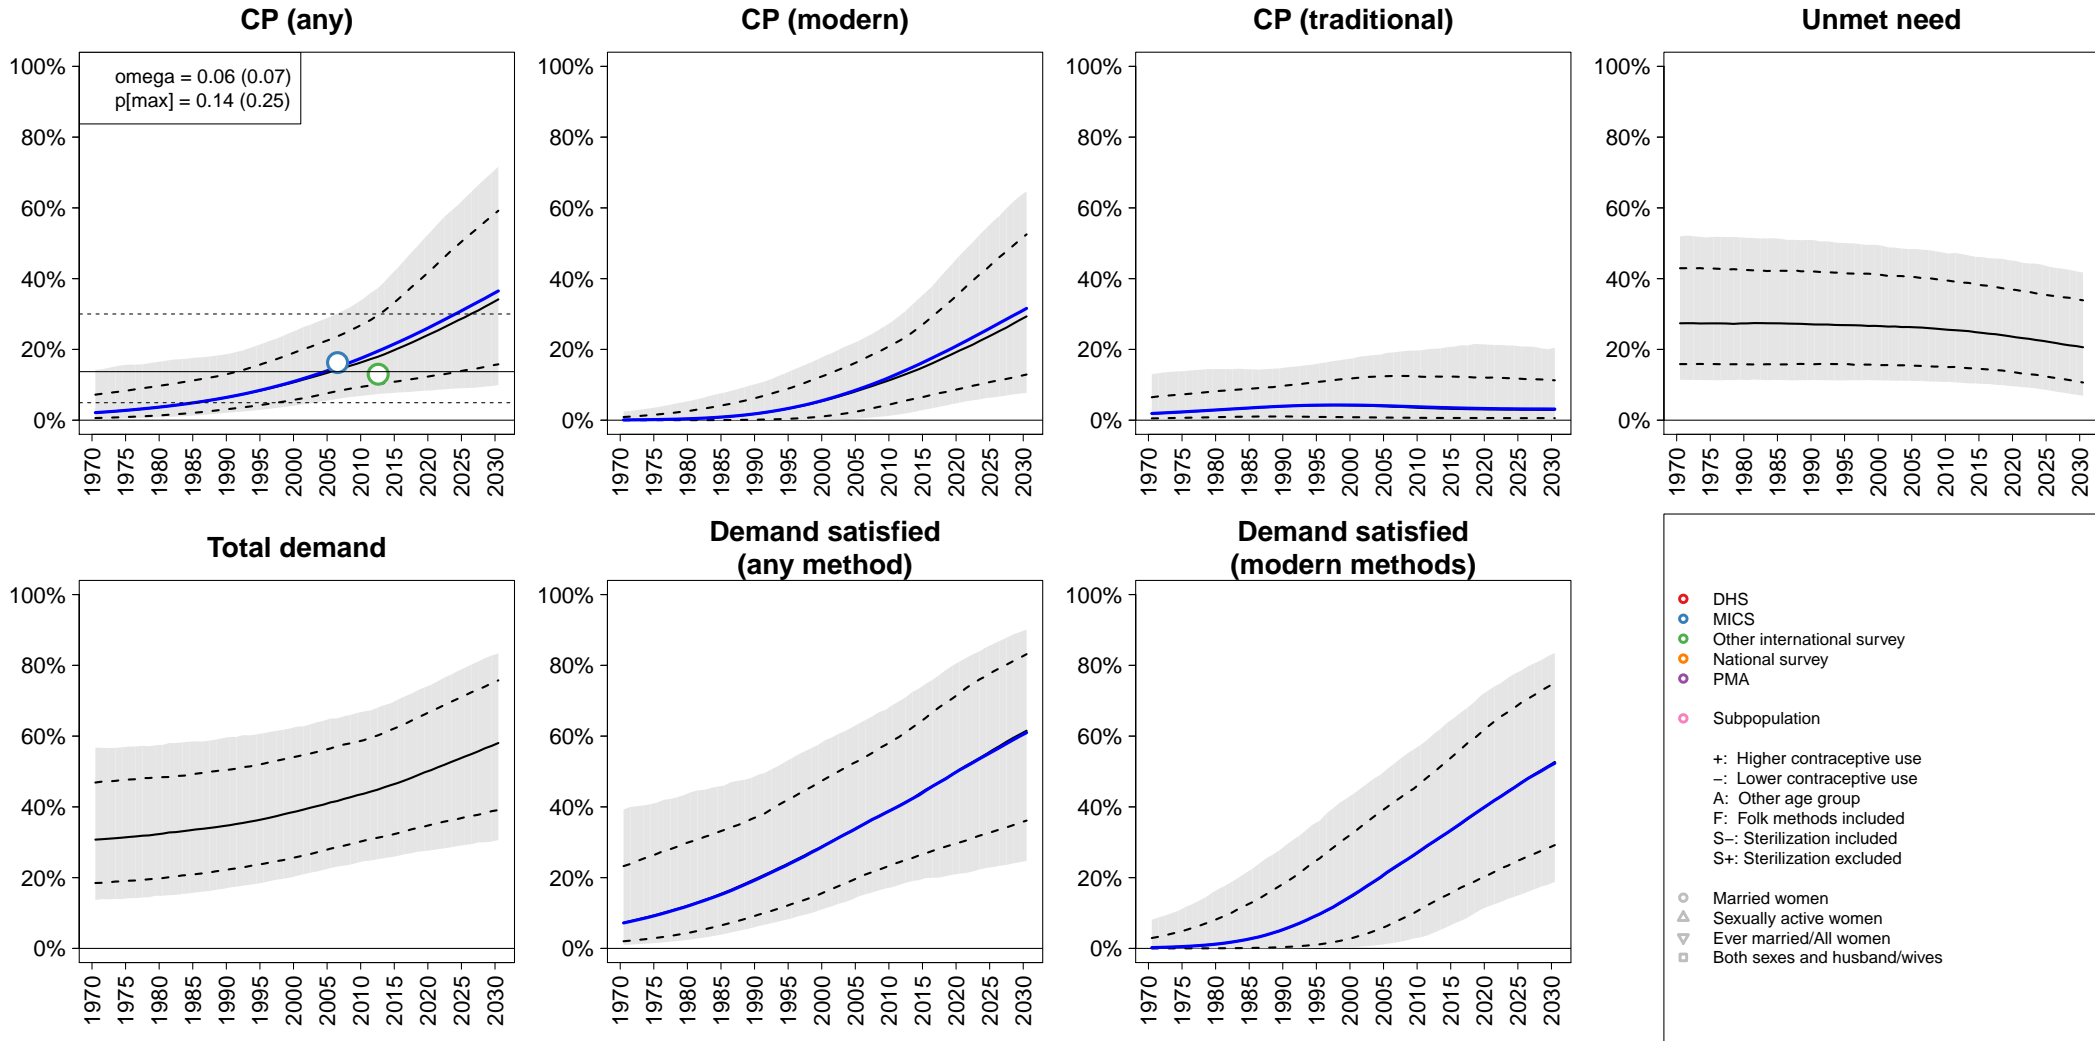

Dominica (Caribbean) --- Married / In-Union

CP (any)

CP (modern)

CP (traditional)

Unmet need

Total demand

Demand satisfied (any method)

Demand satisfied (modern methods)

- DHS
- MICS
- Other international survey
- National survey
- PMA
- Subpopulation
- + : Higher contraceptive use
- : Lower contraceptive use
- A : Other age group
- F : Folk methods included
- S- : Sterilization included
- S+ : Sterilization excluded
- Married women
- △ Sexually active women
- ▽ Ever married/All women
- Both sexes and husband/wives

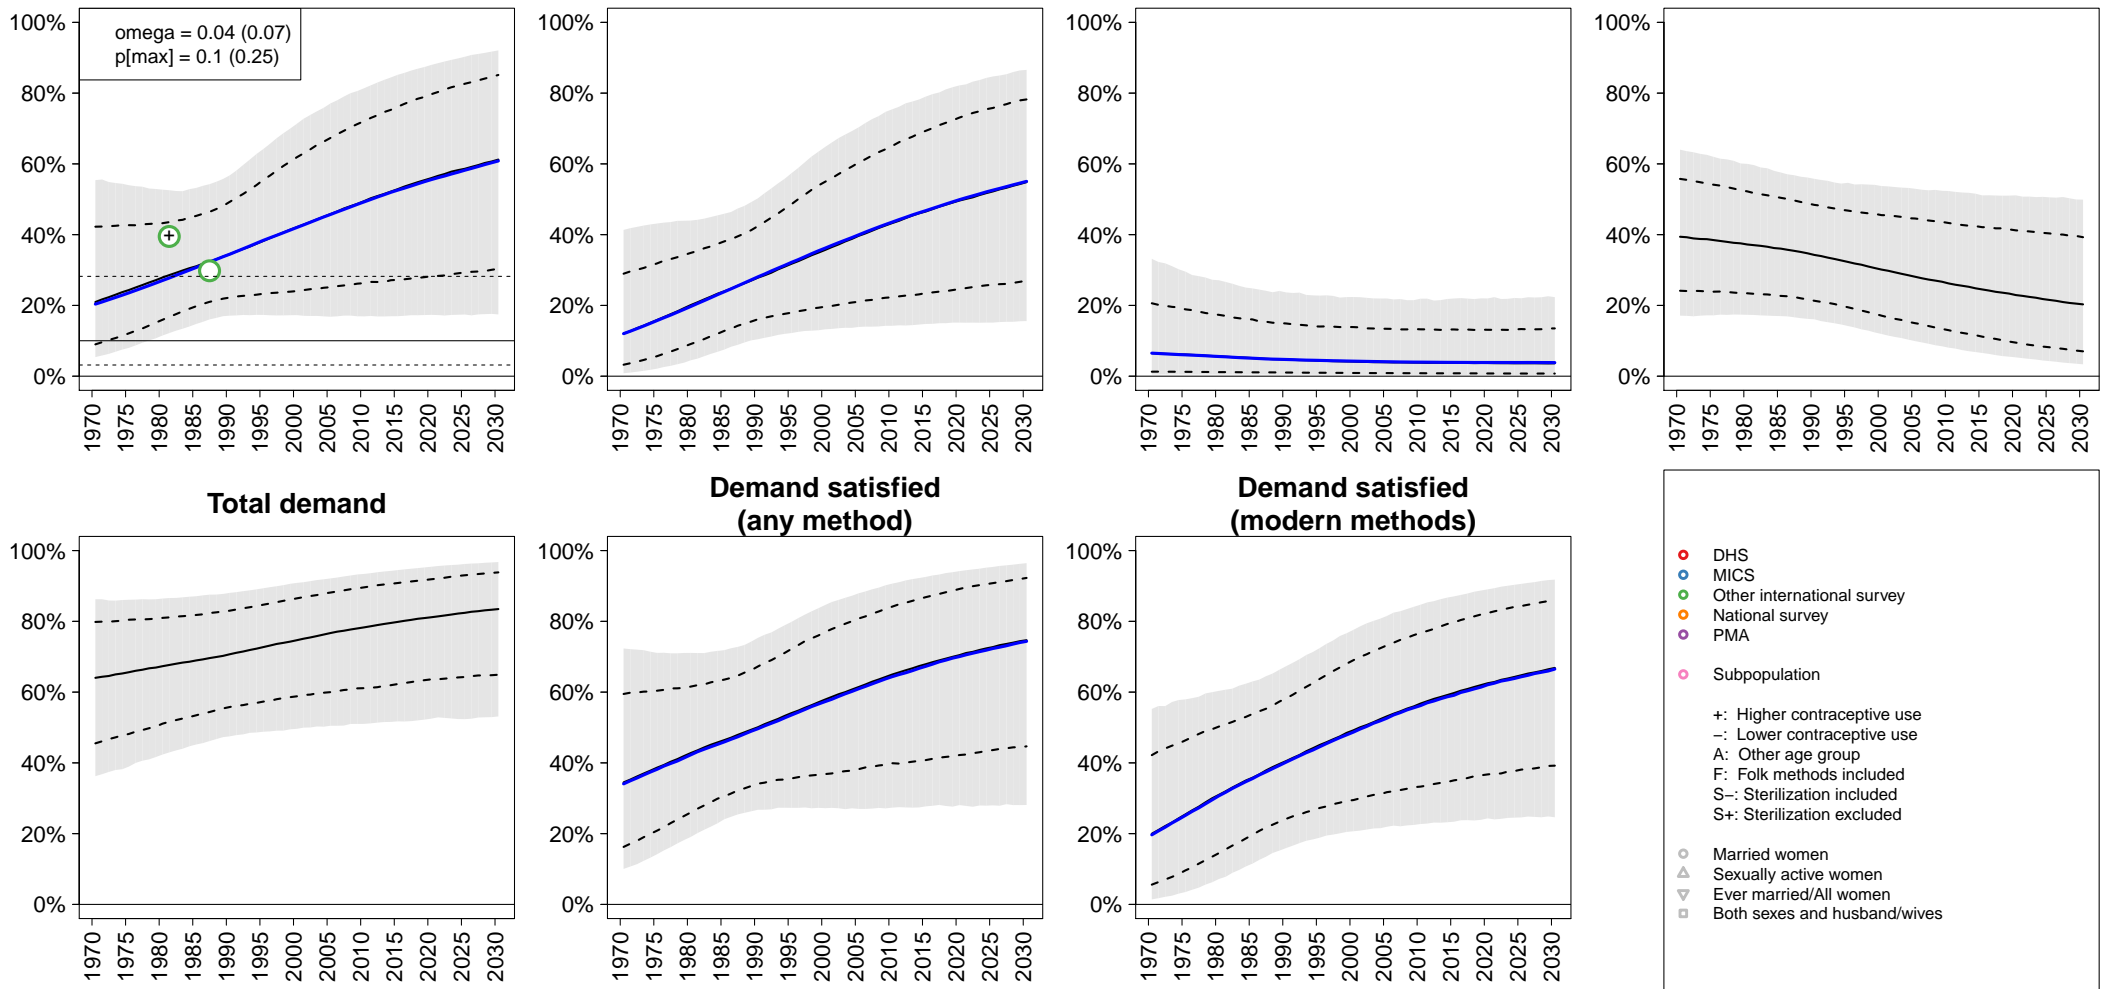

Dominican Republic (Caribbean) --- Married / In-Union

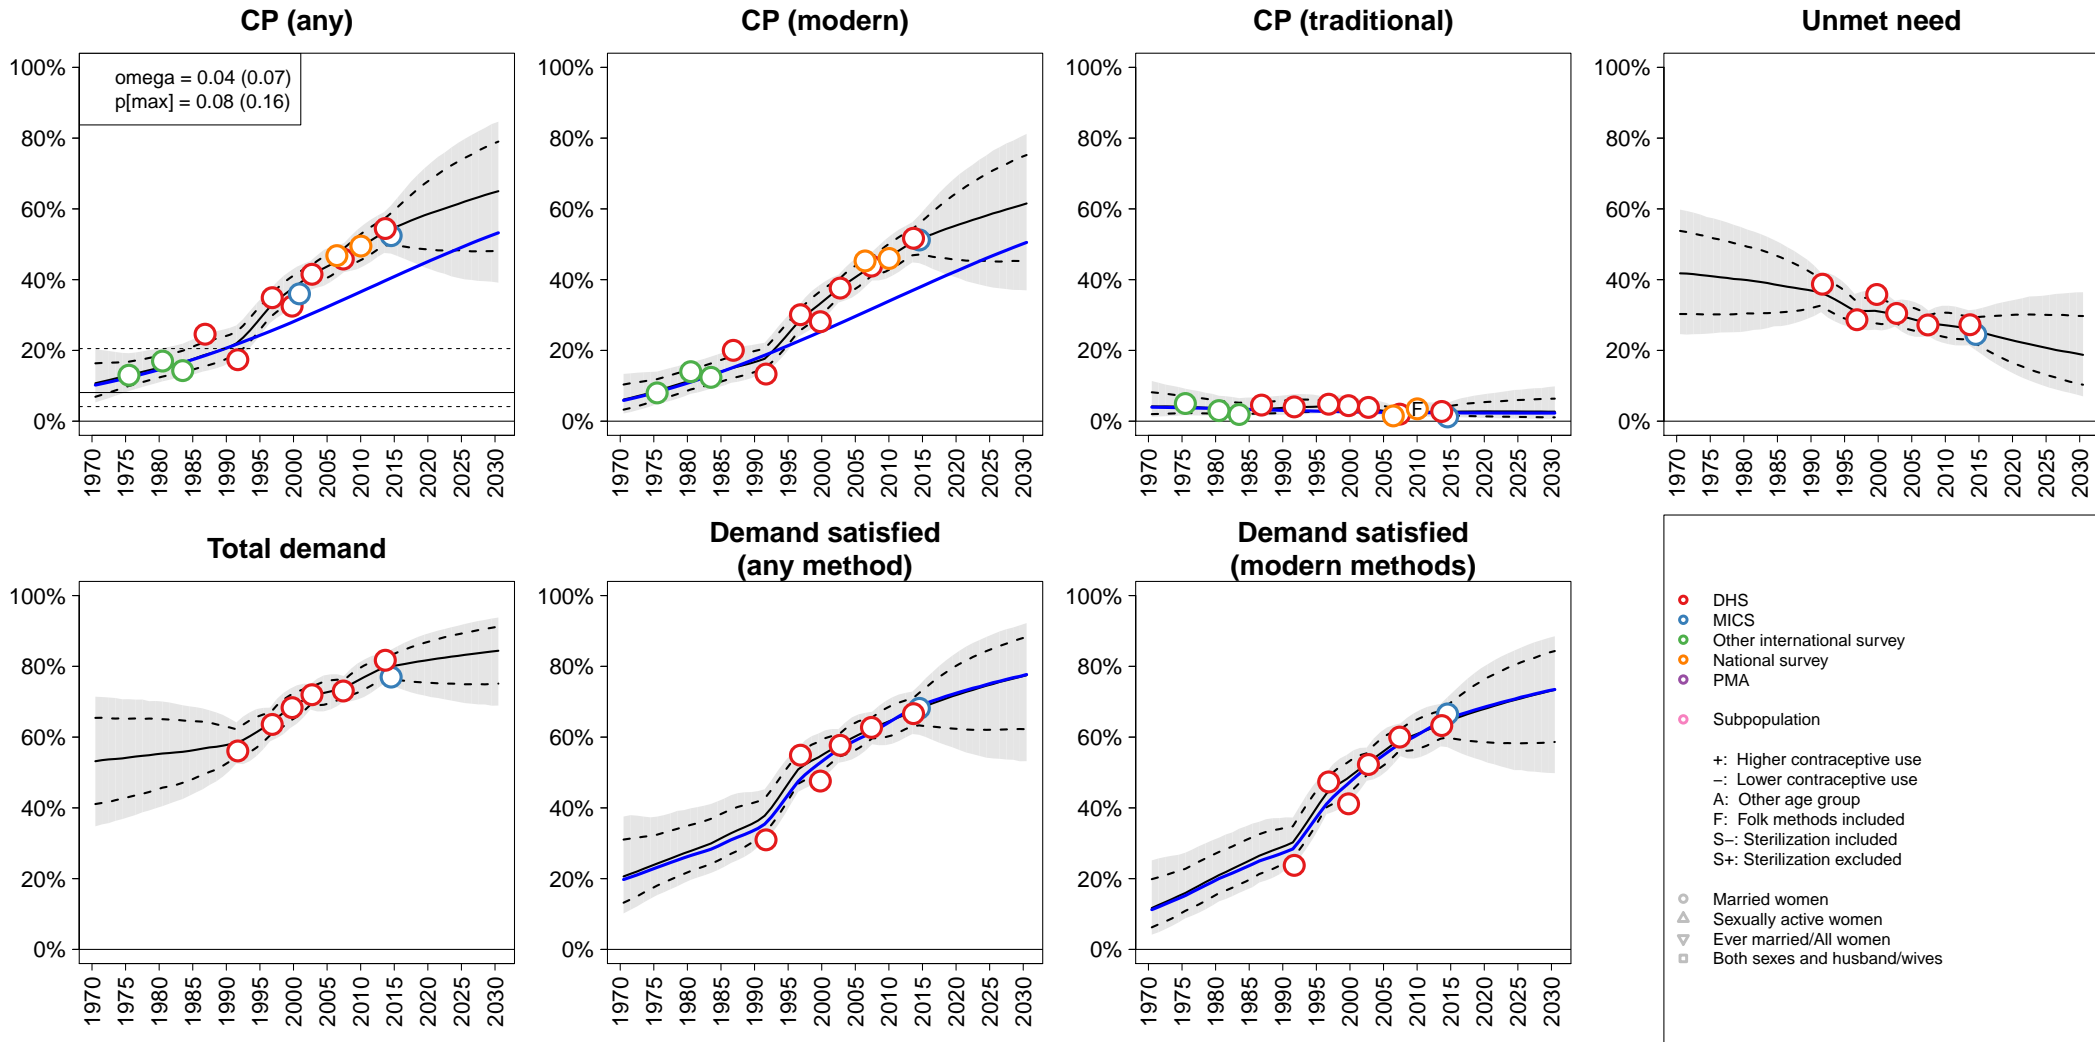

Ecuador (South America) --- Married / In-Union

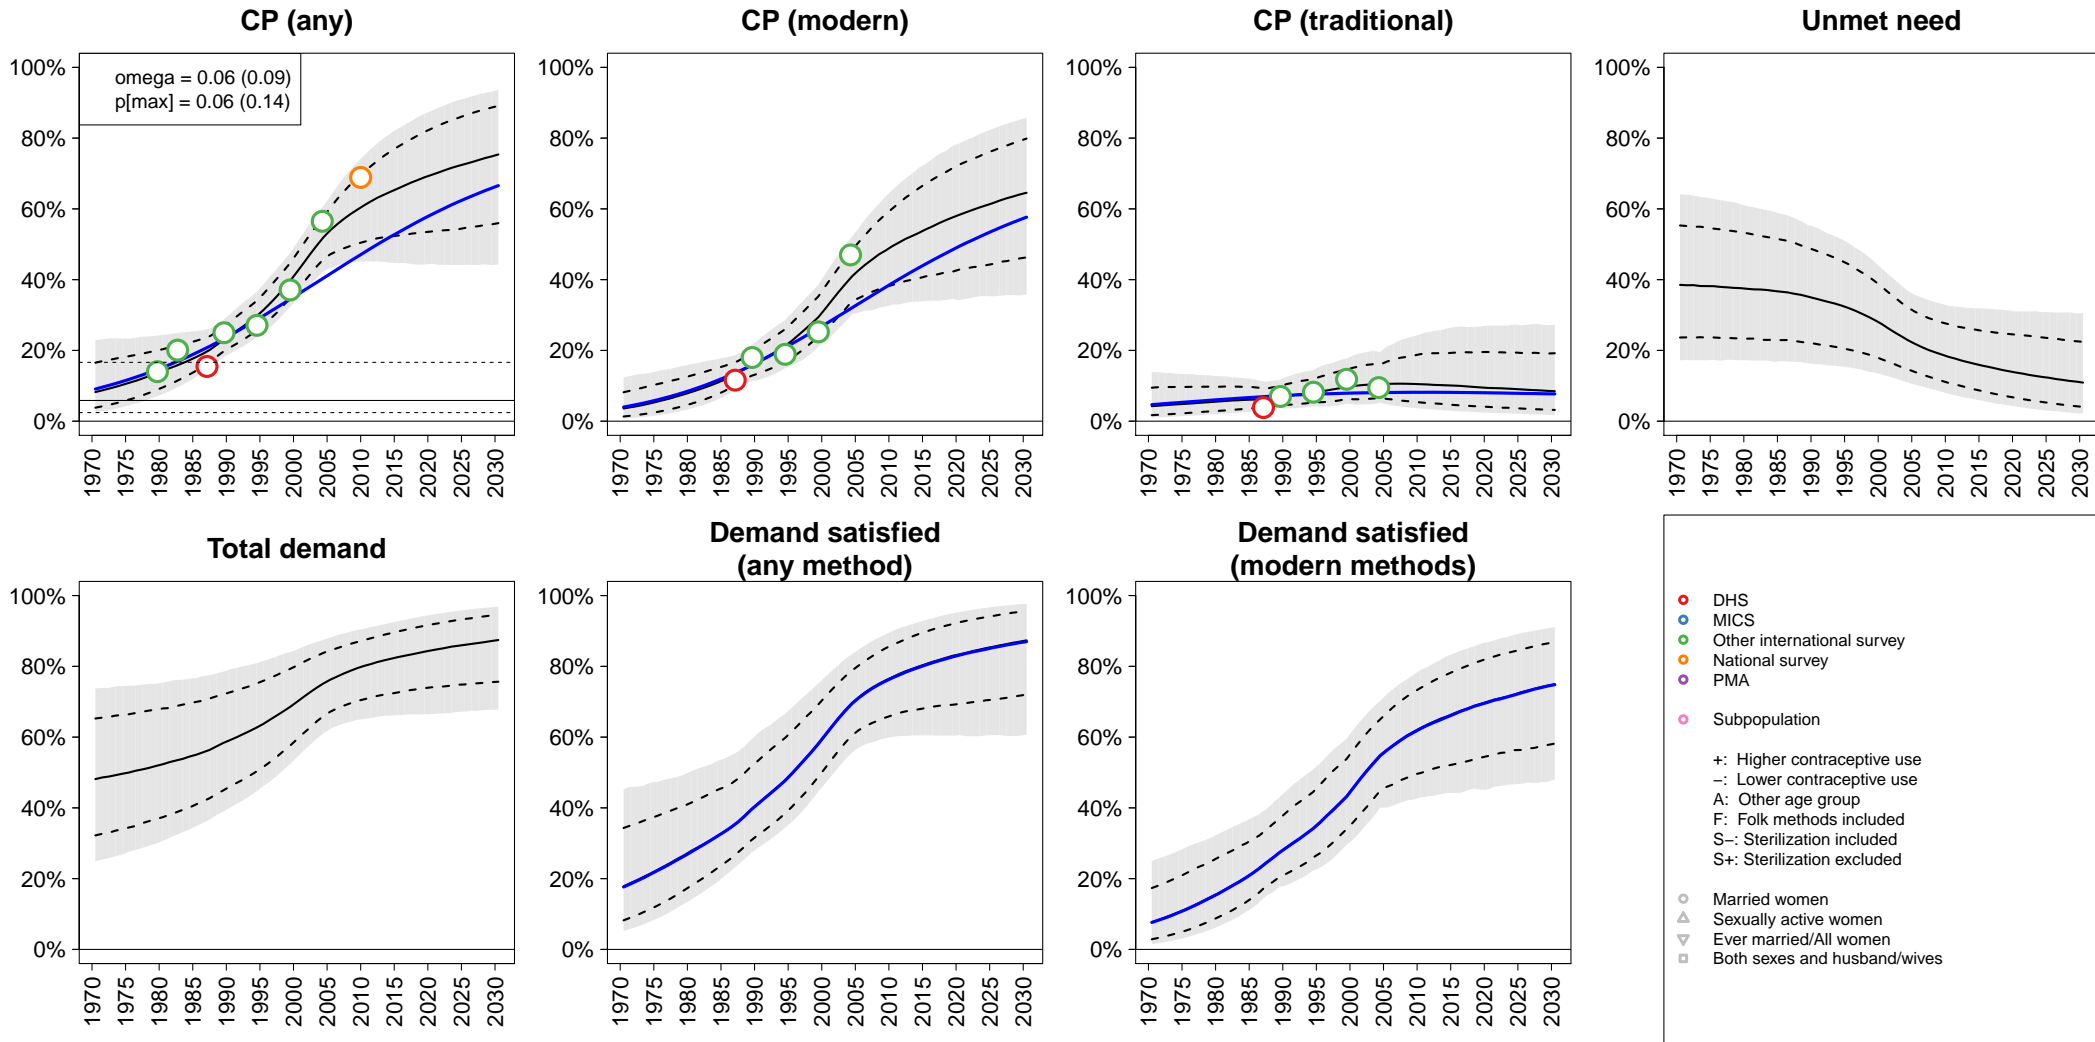

Egypt (Northern Africa) --- Married / In-Union

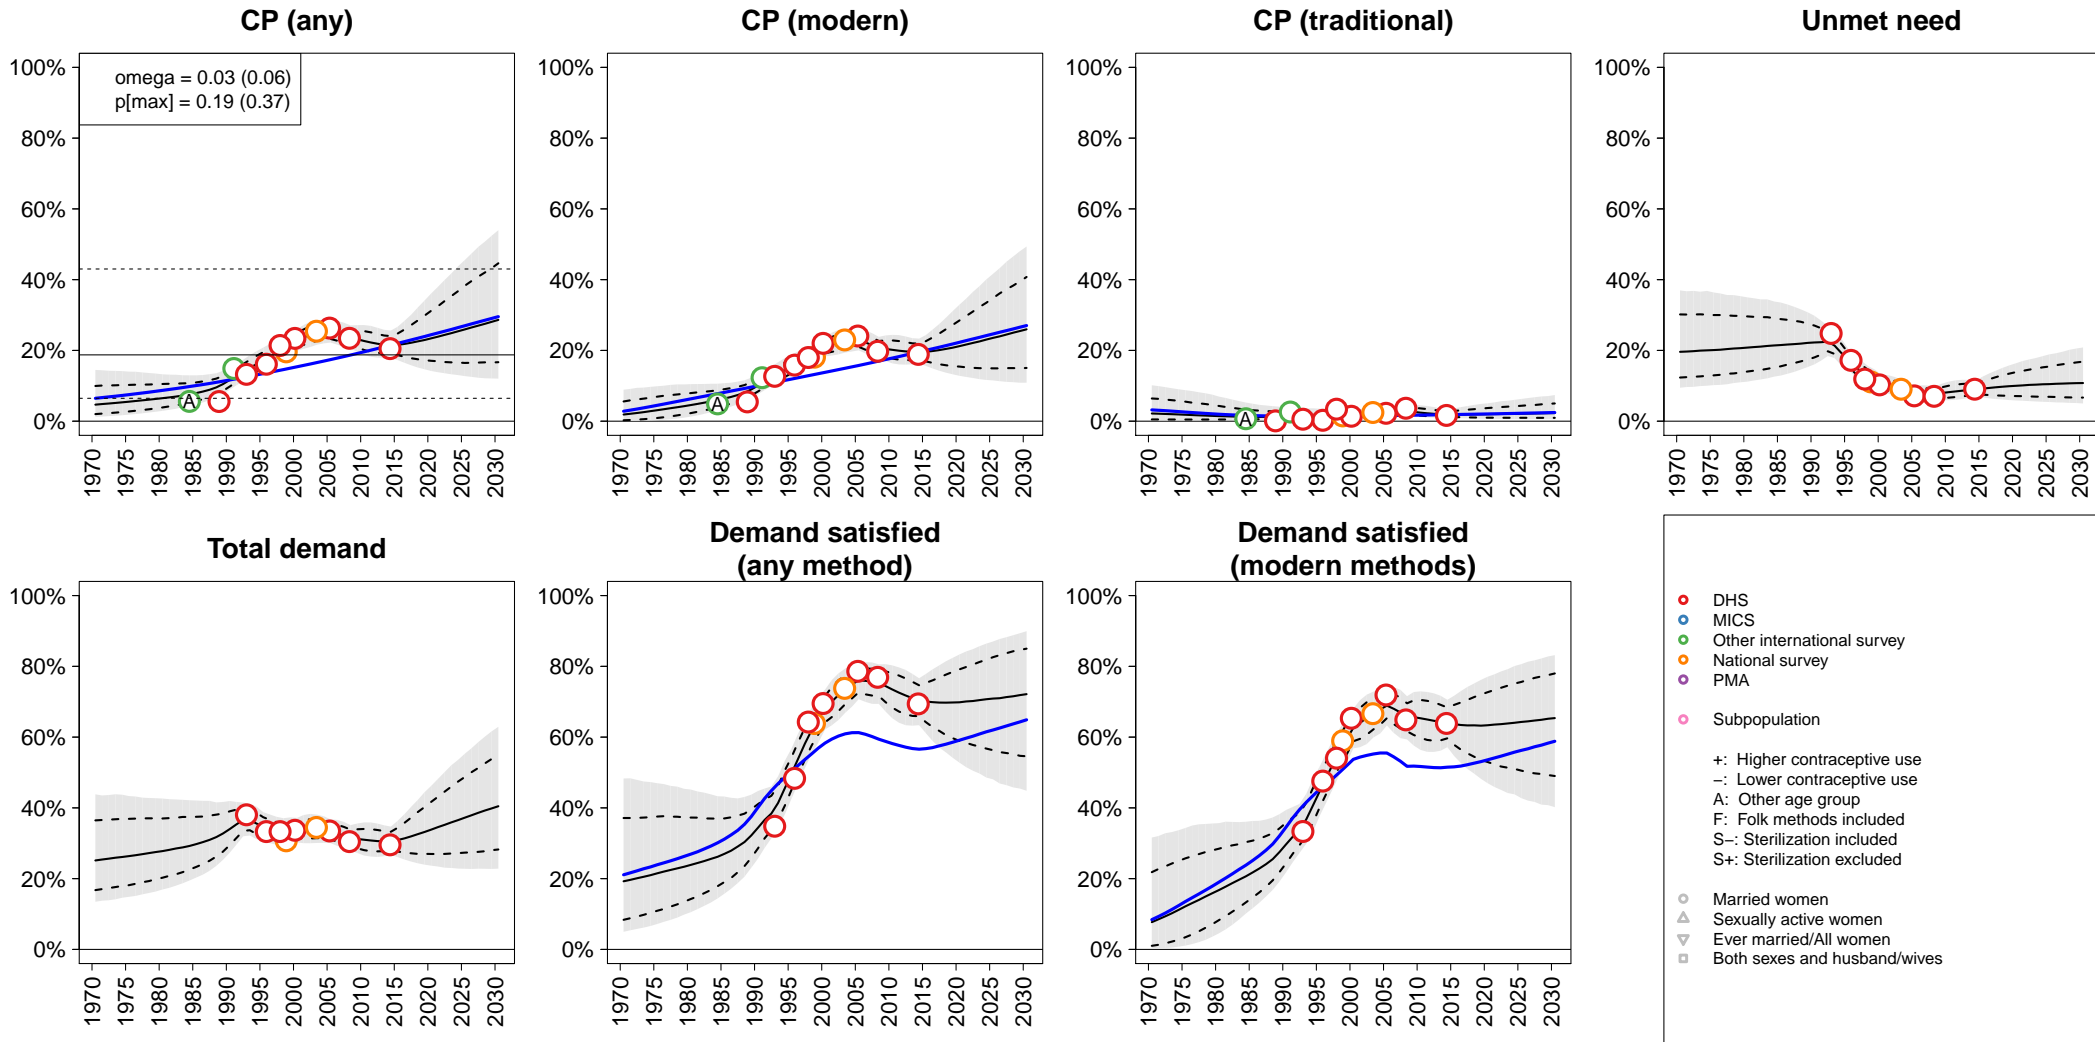

El Salvador (Central America) --- Married / In-Union

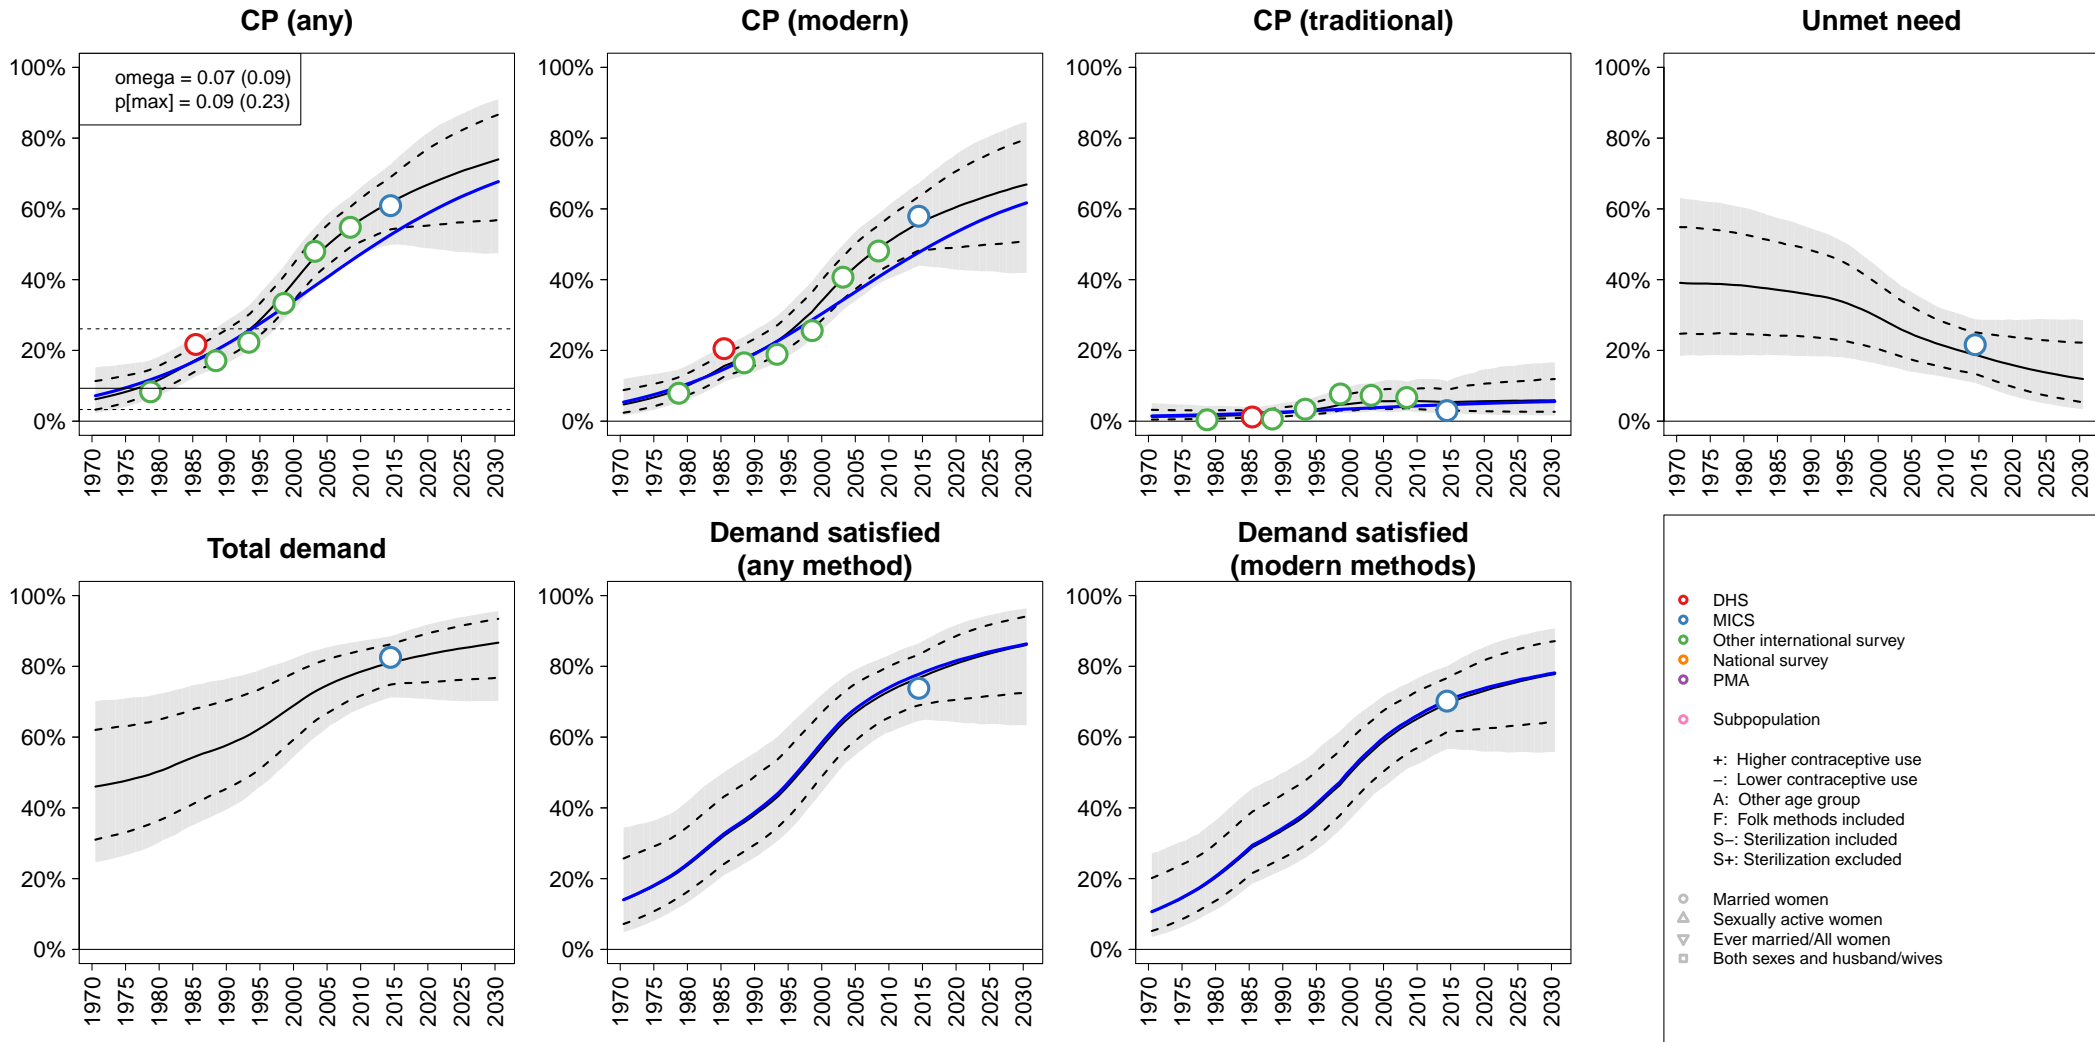

Equatorial Guinea (Middle Africa) --- Married / In-Union

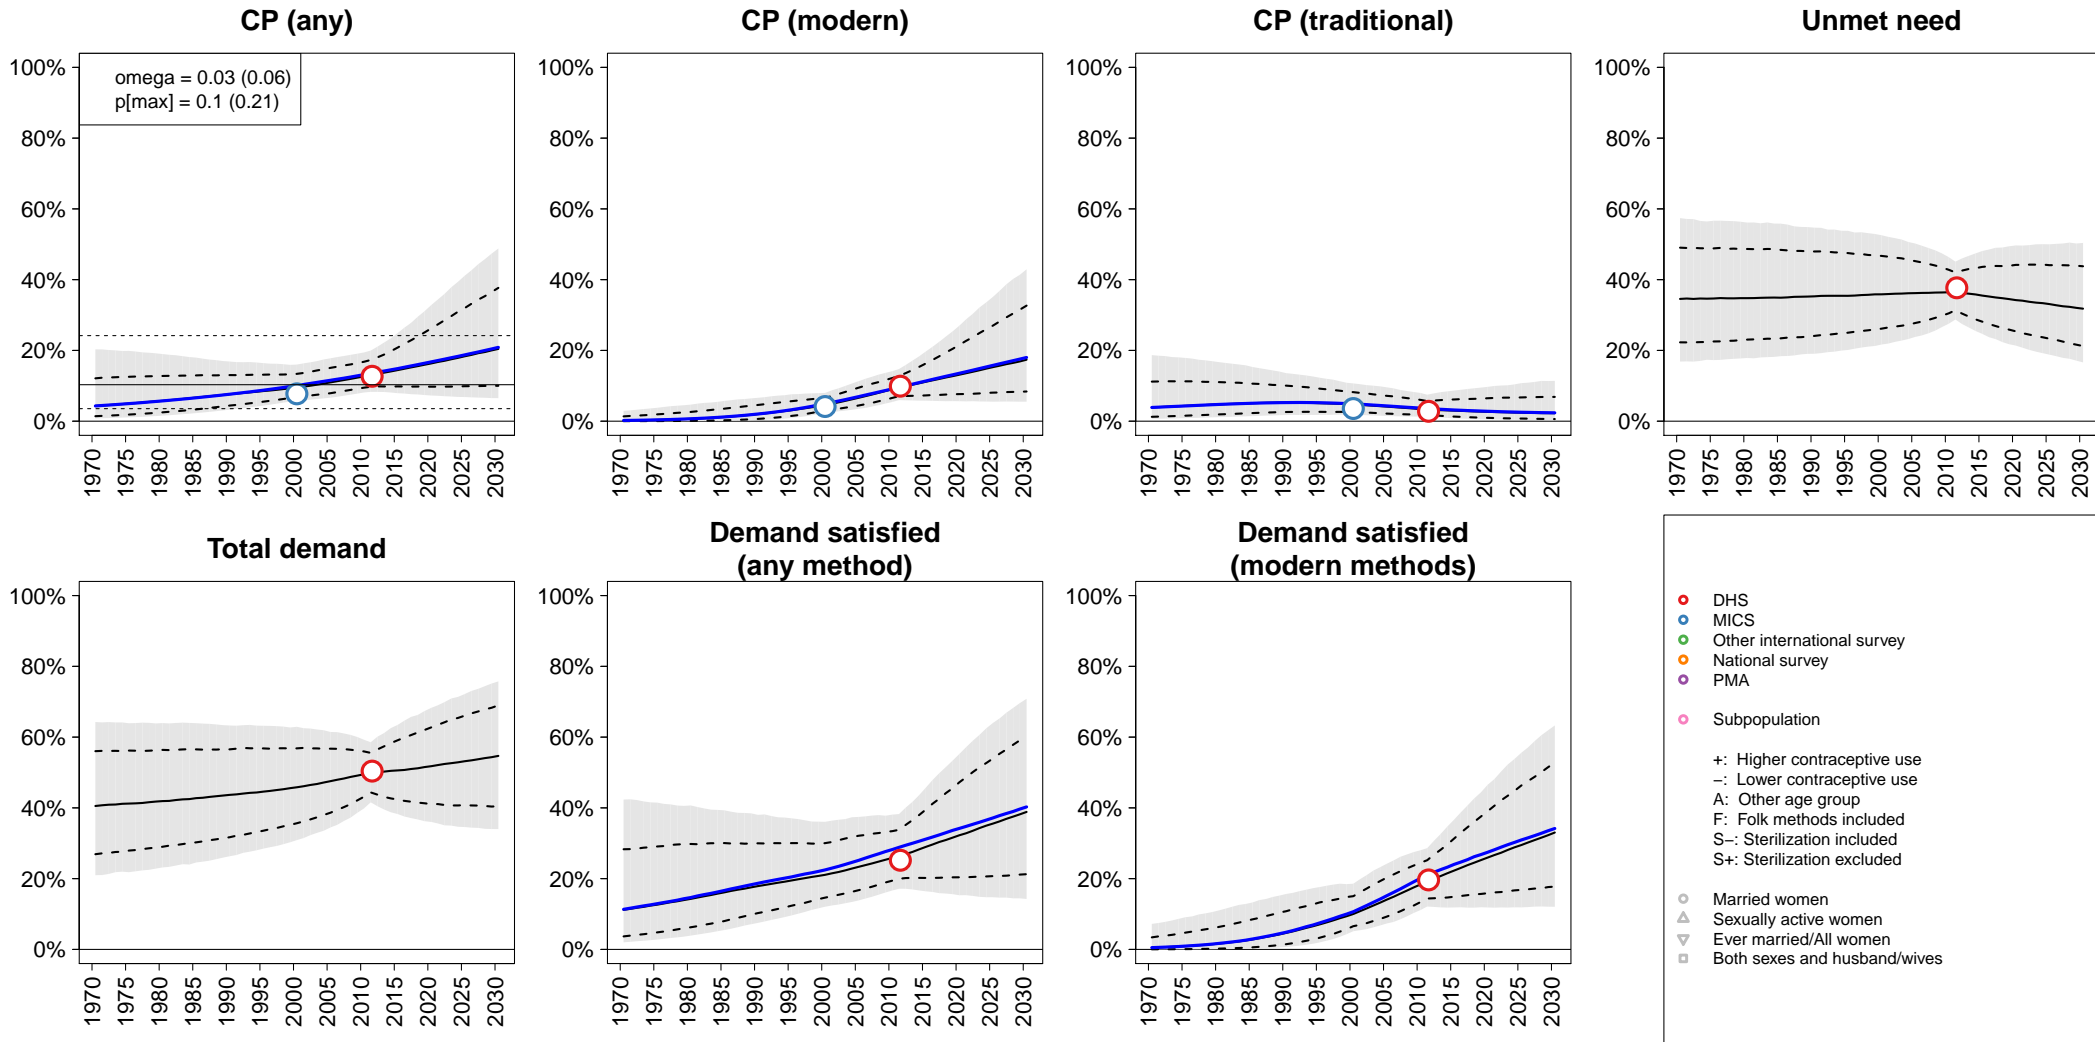

### Eritrea (Eastern Africa) --- Married / In-Union

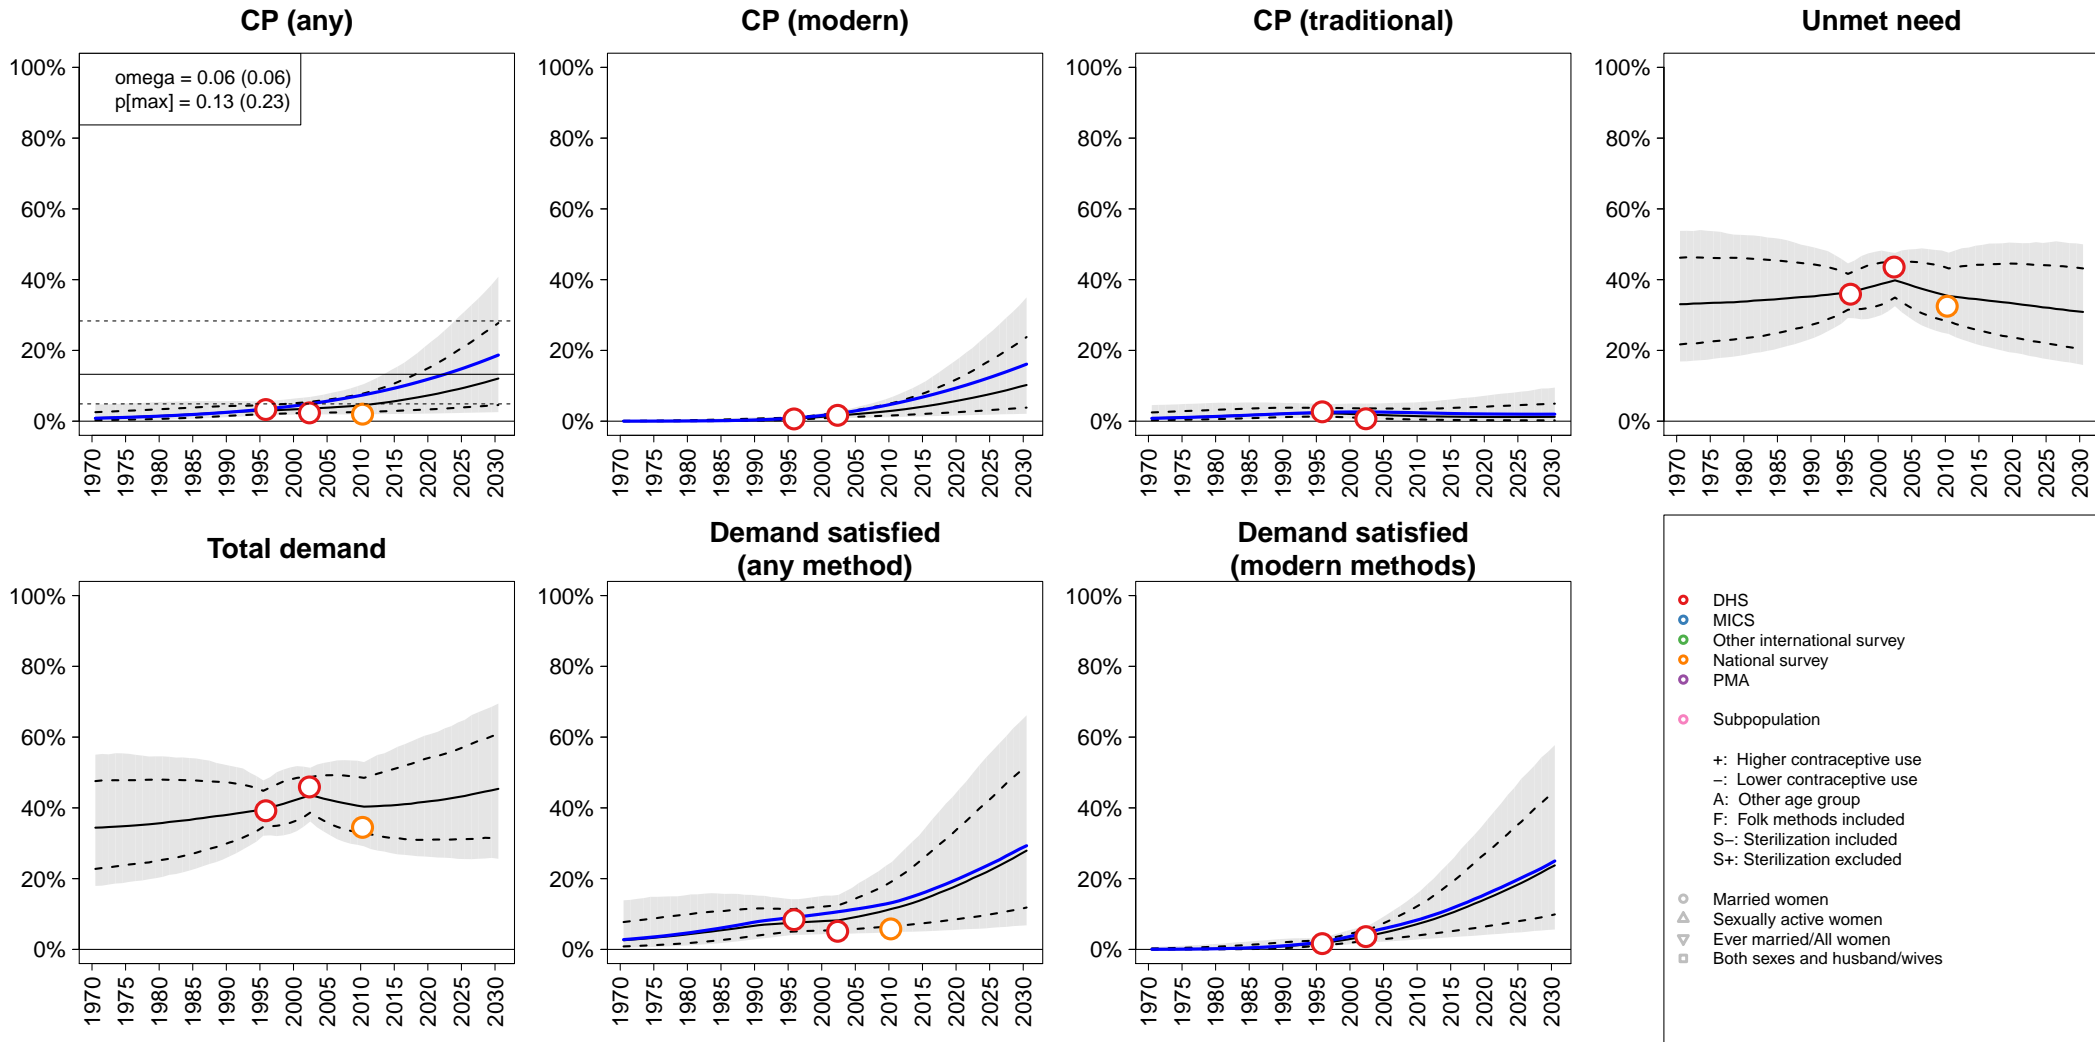



Eswatini (Southern Africa) --- Married / In-Union

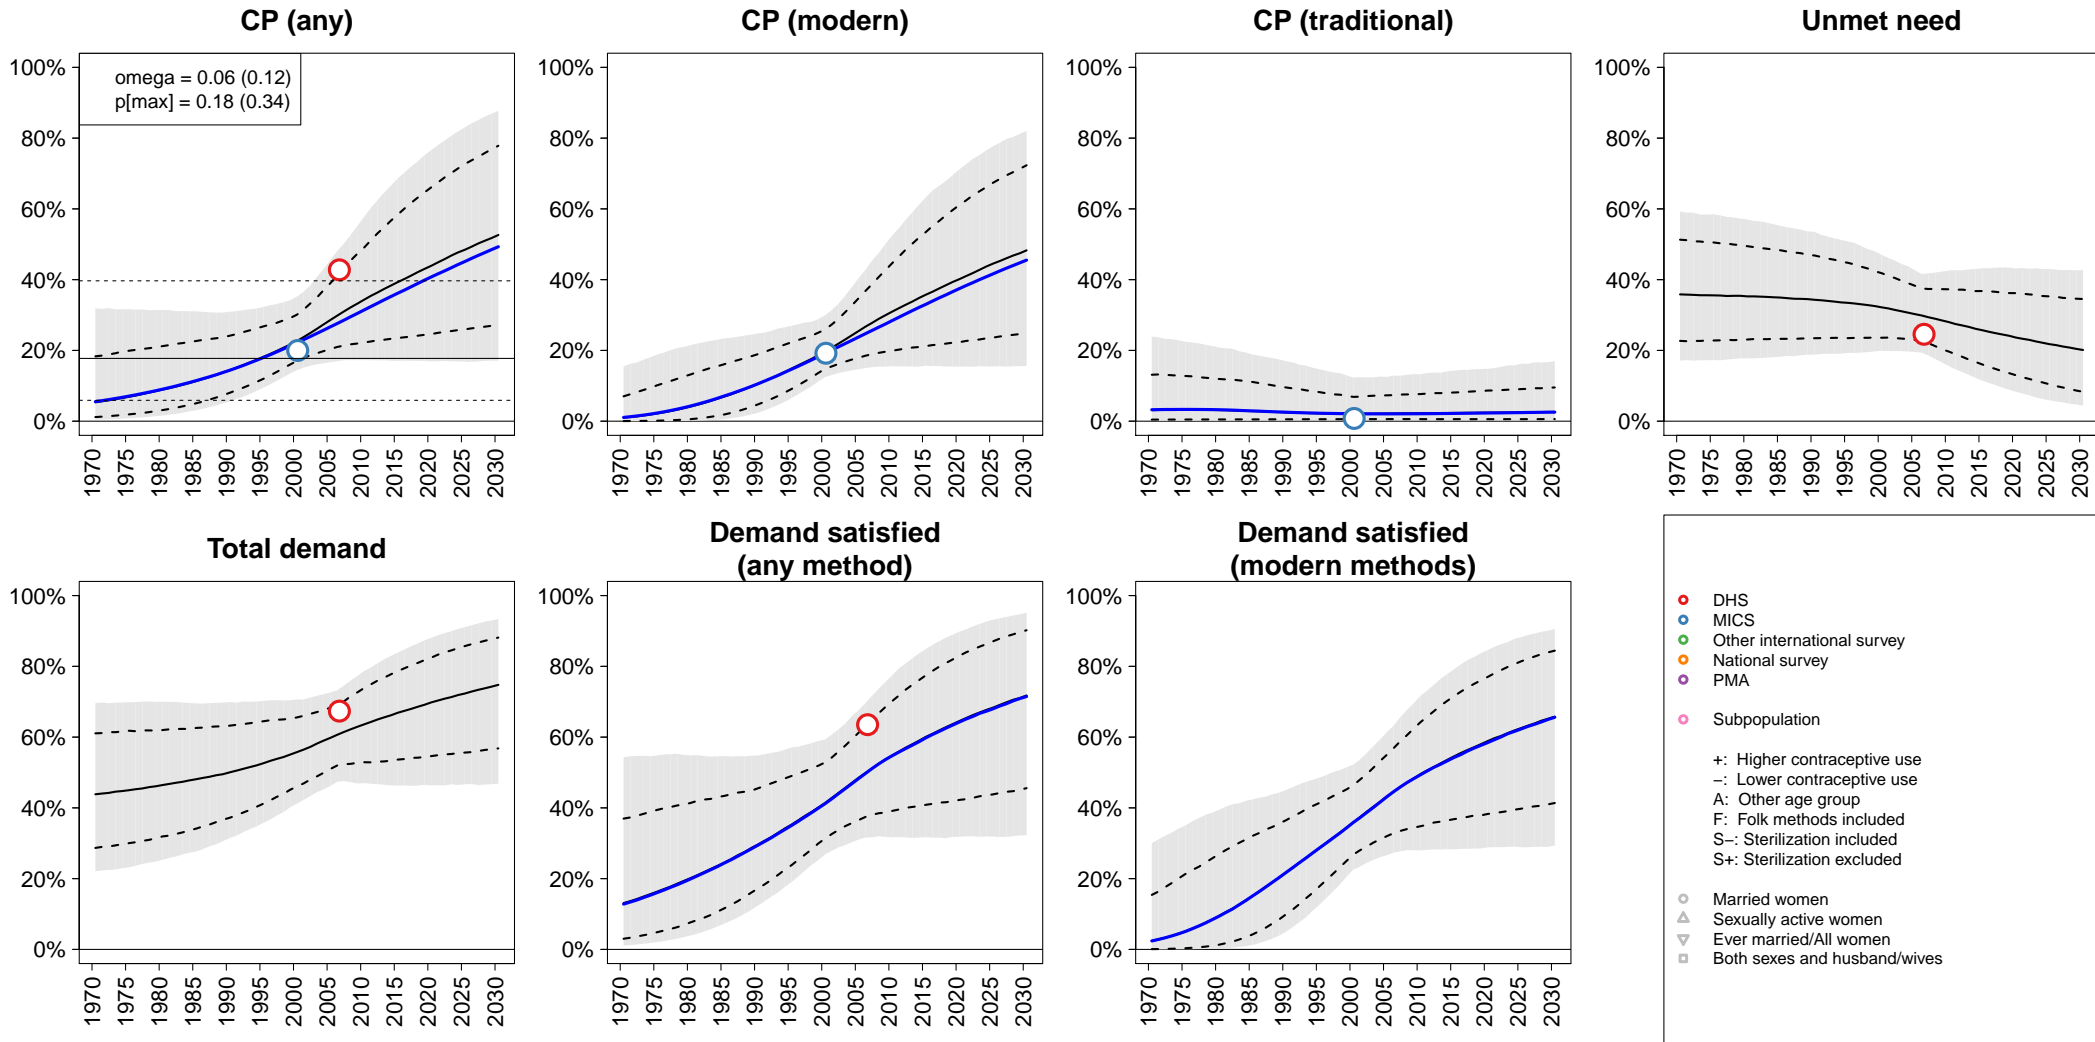

Ethiopia (Eastern Africa) --- Married / In-Union

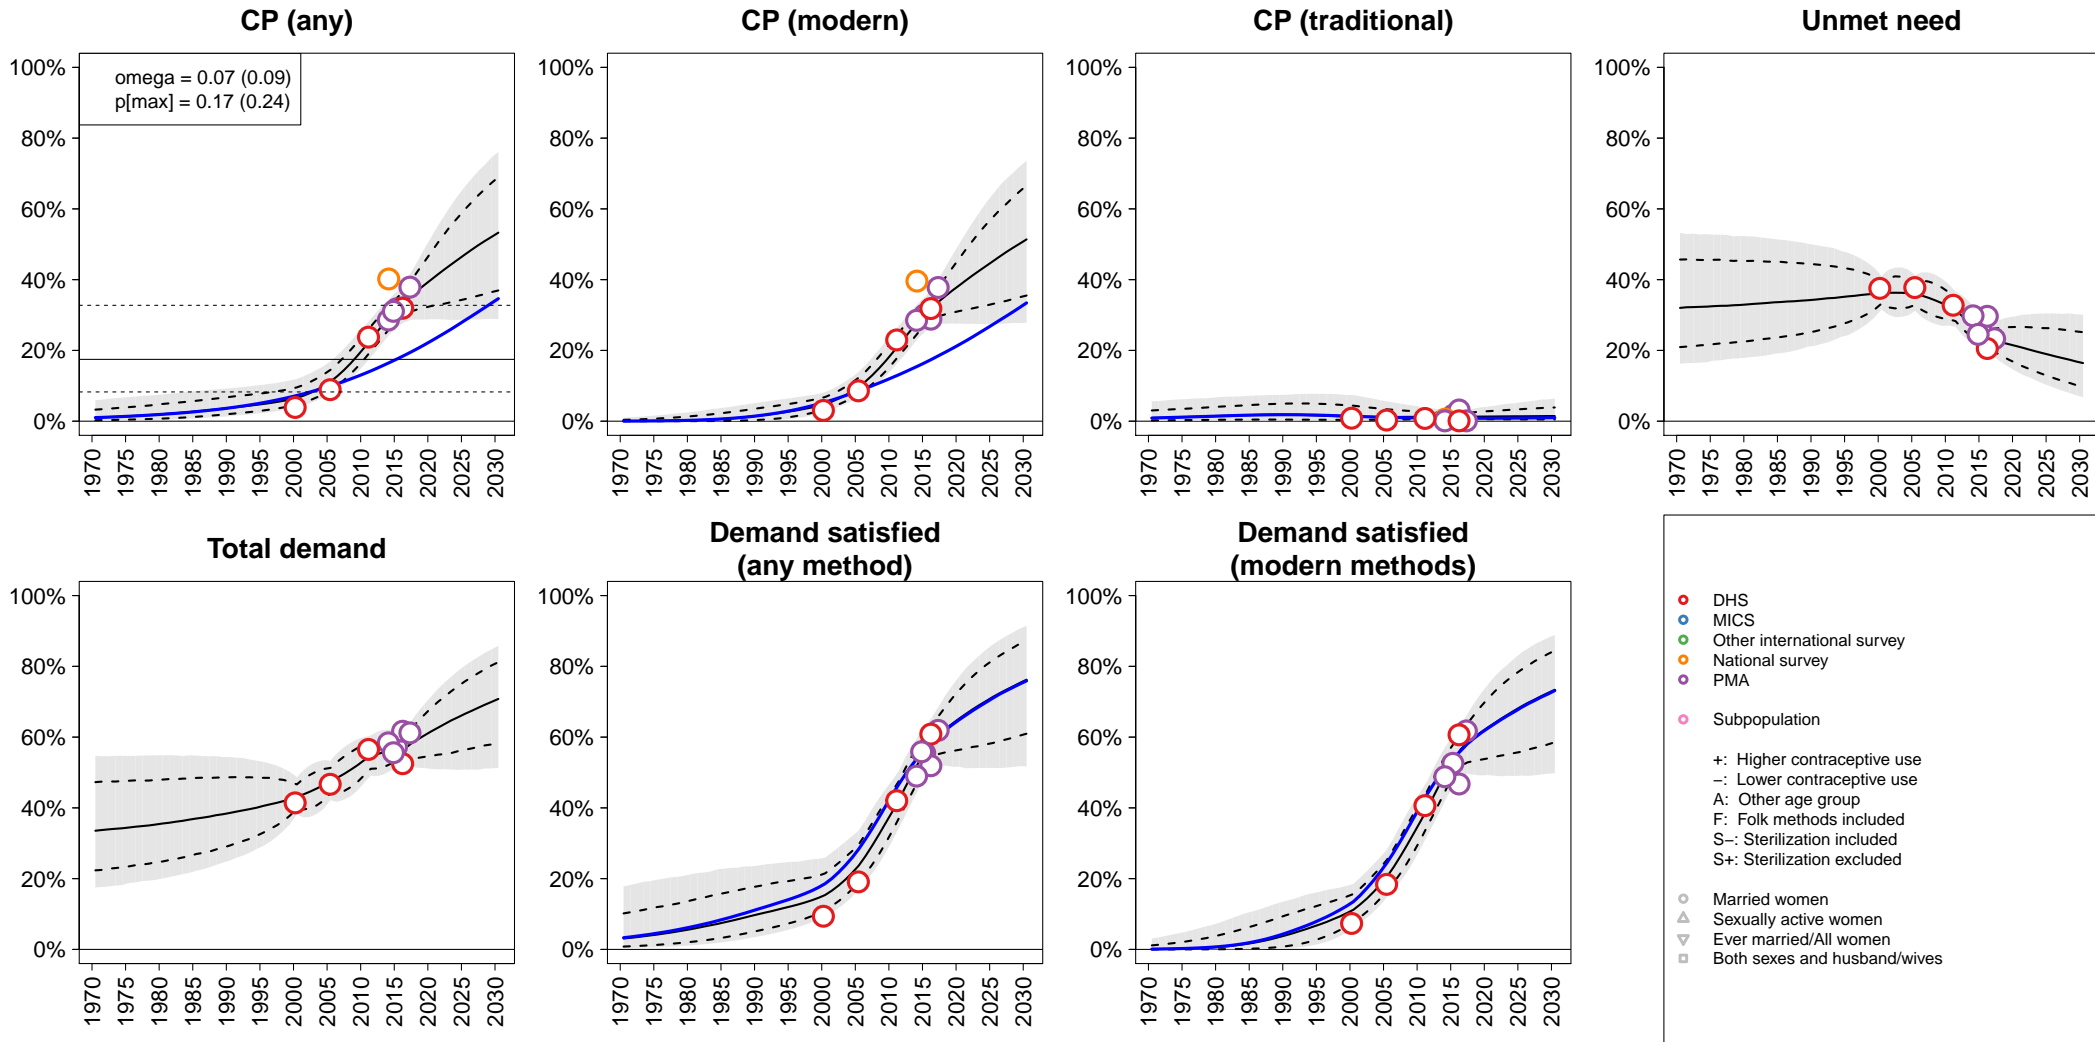

Gabon (Middle Africa) --- Married / In-Union

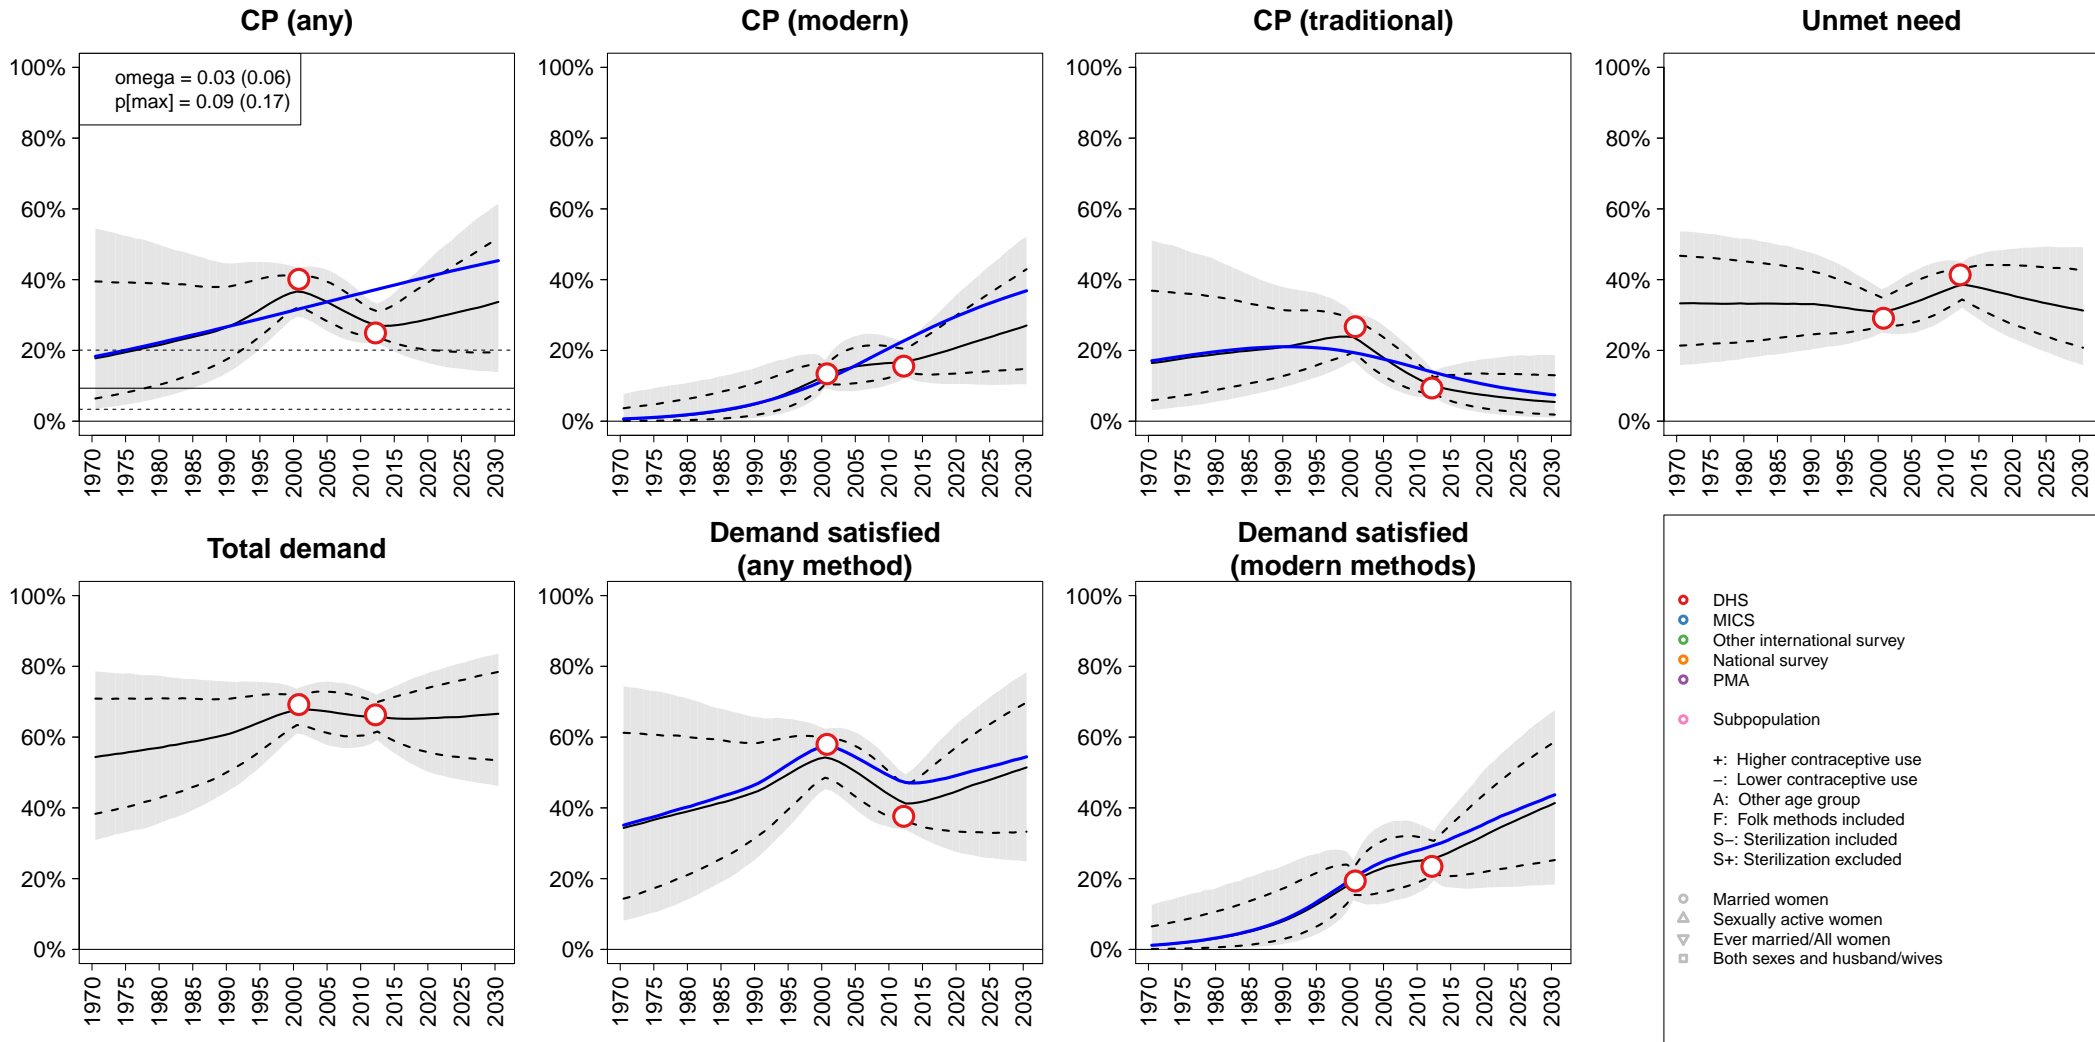

Gambia (Western Africa) --- Married / In-Union

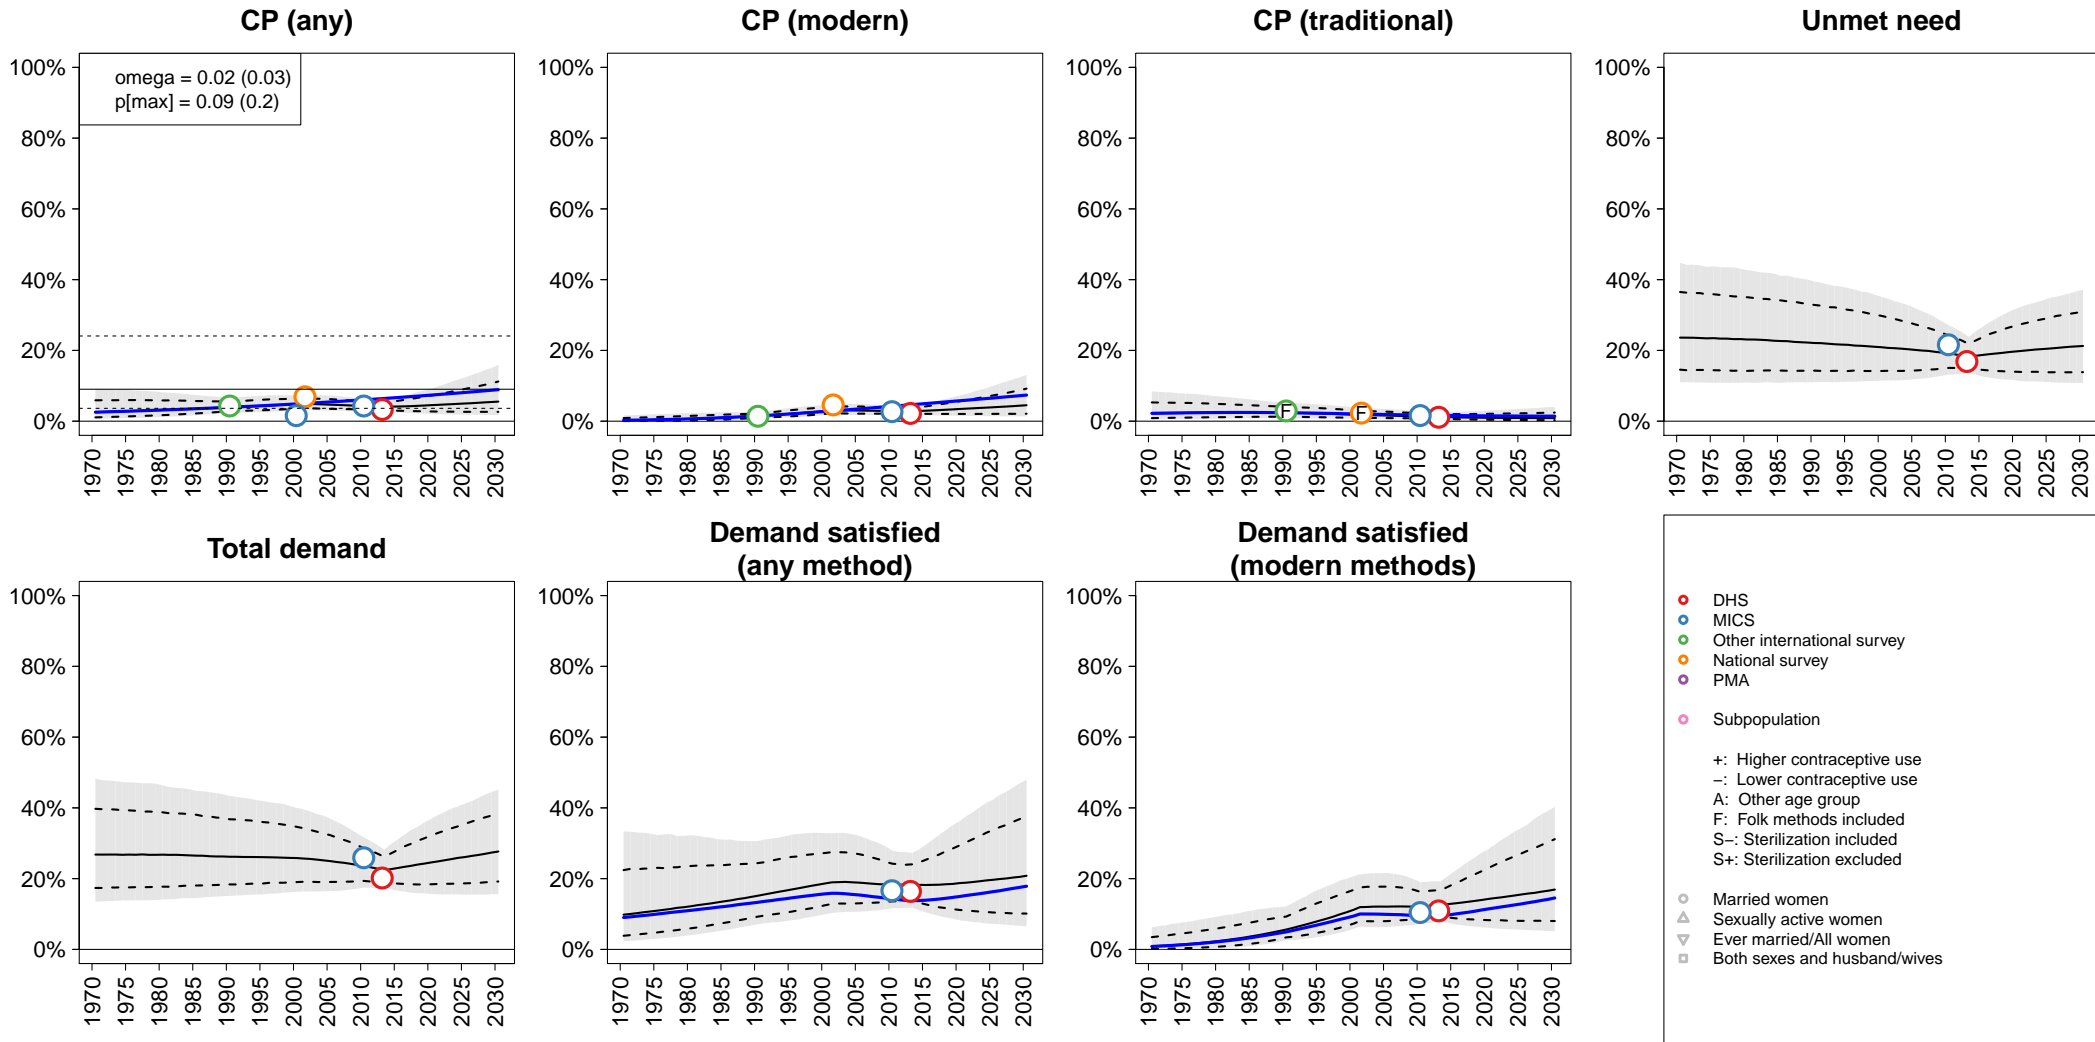

### Georgia (Western Asia) --- Married / In-Union

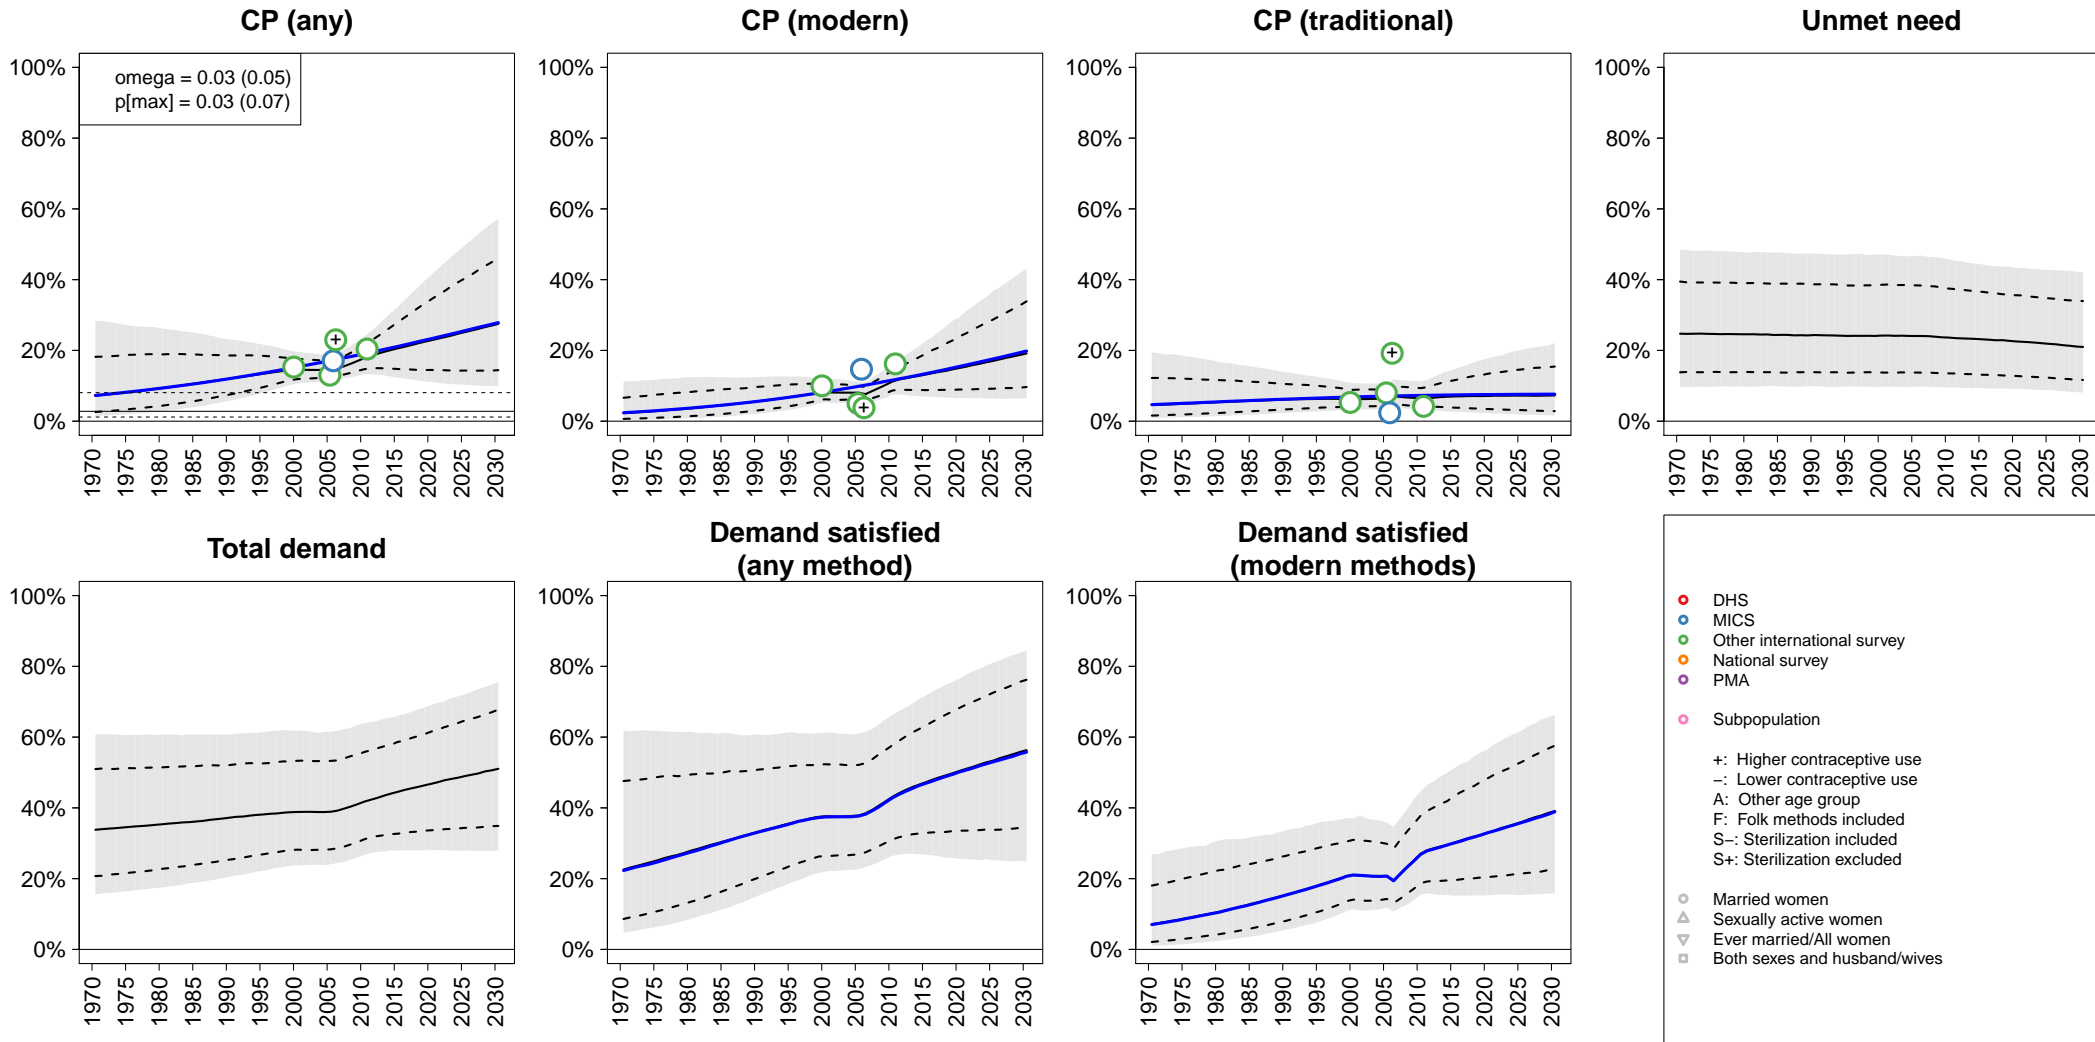

### Ghana (Western Africa) --- Married / In-Union

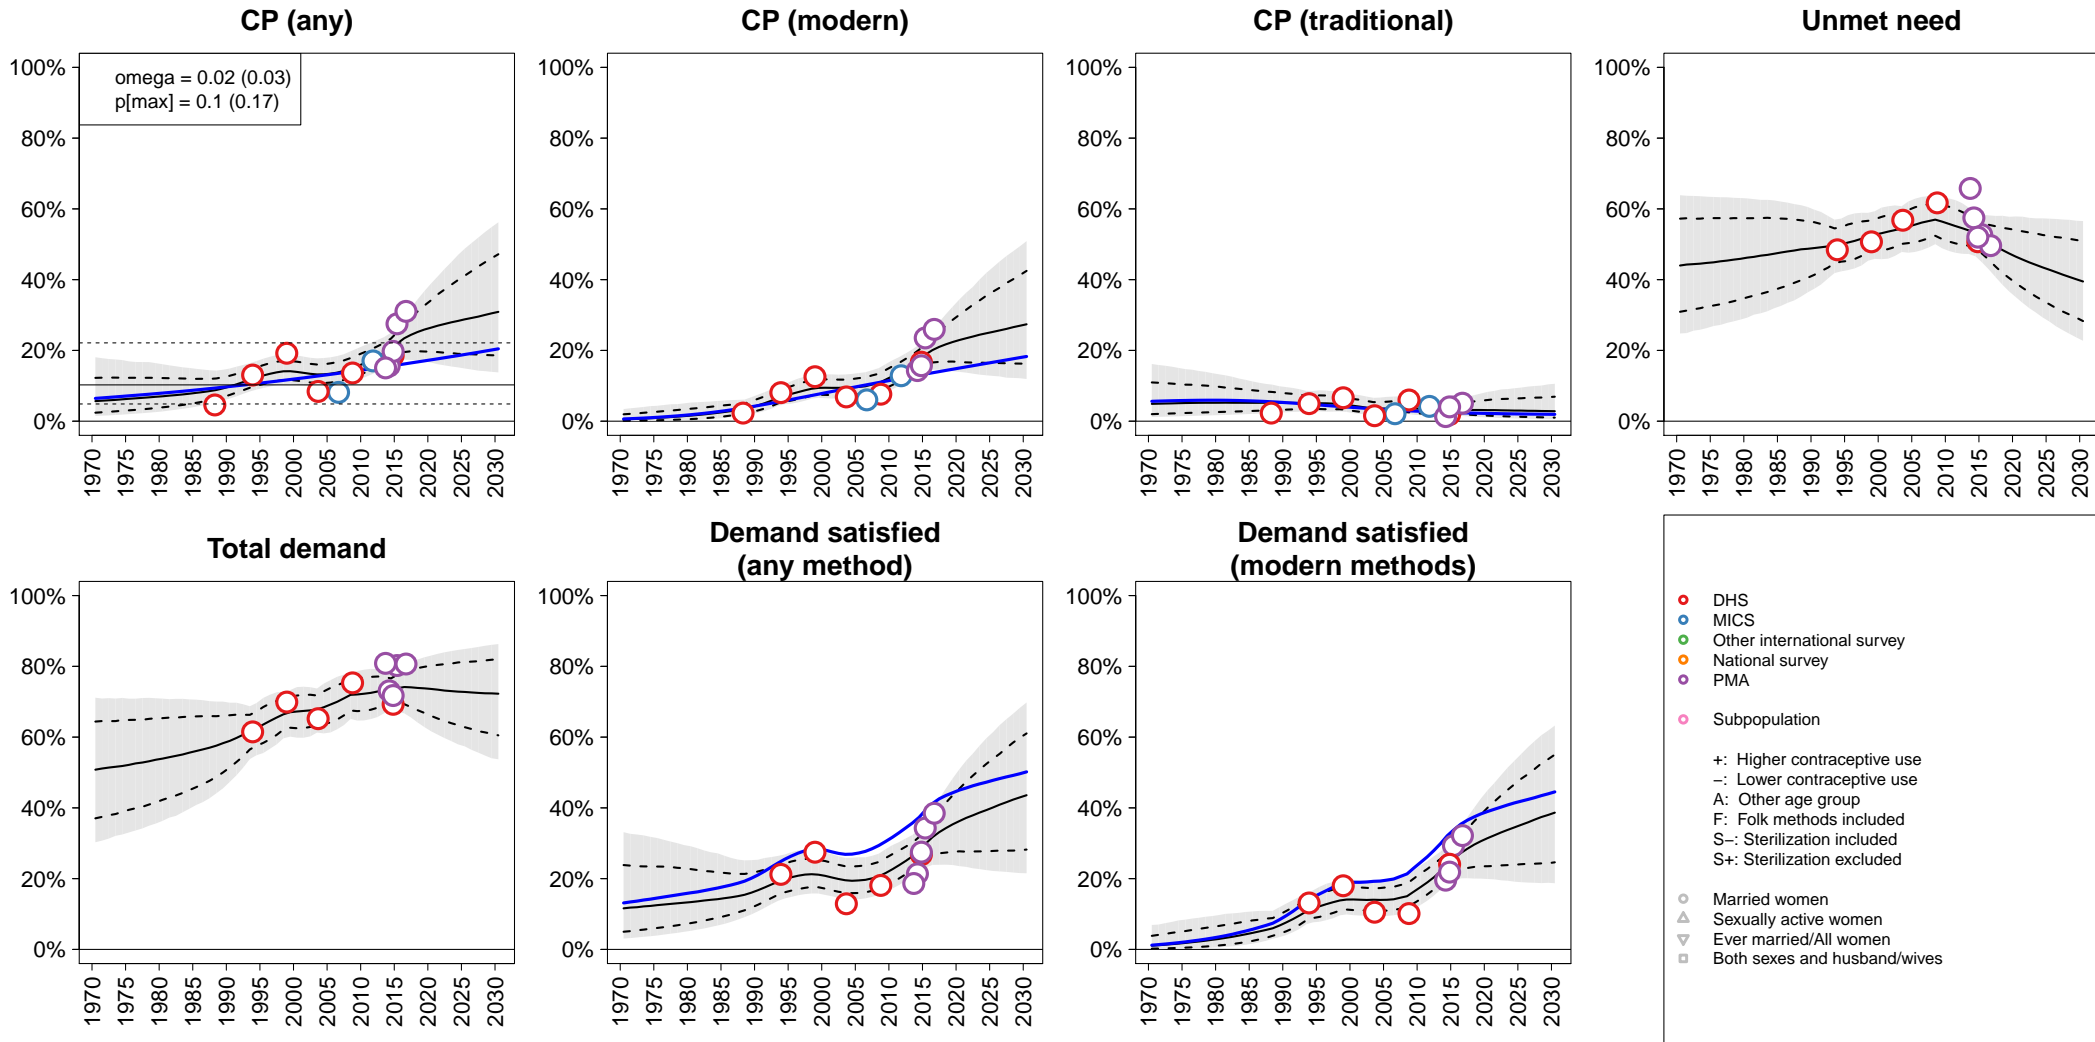

Grenada (Caribbean) --- Married / In-Union

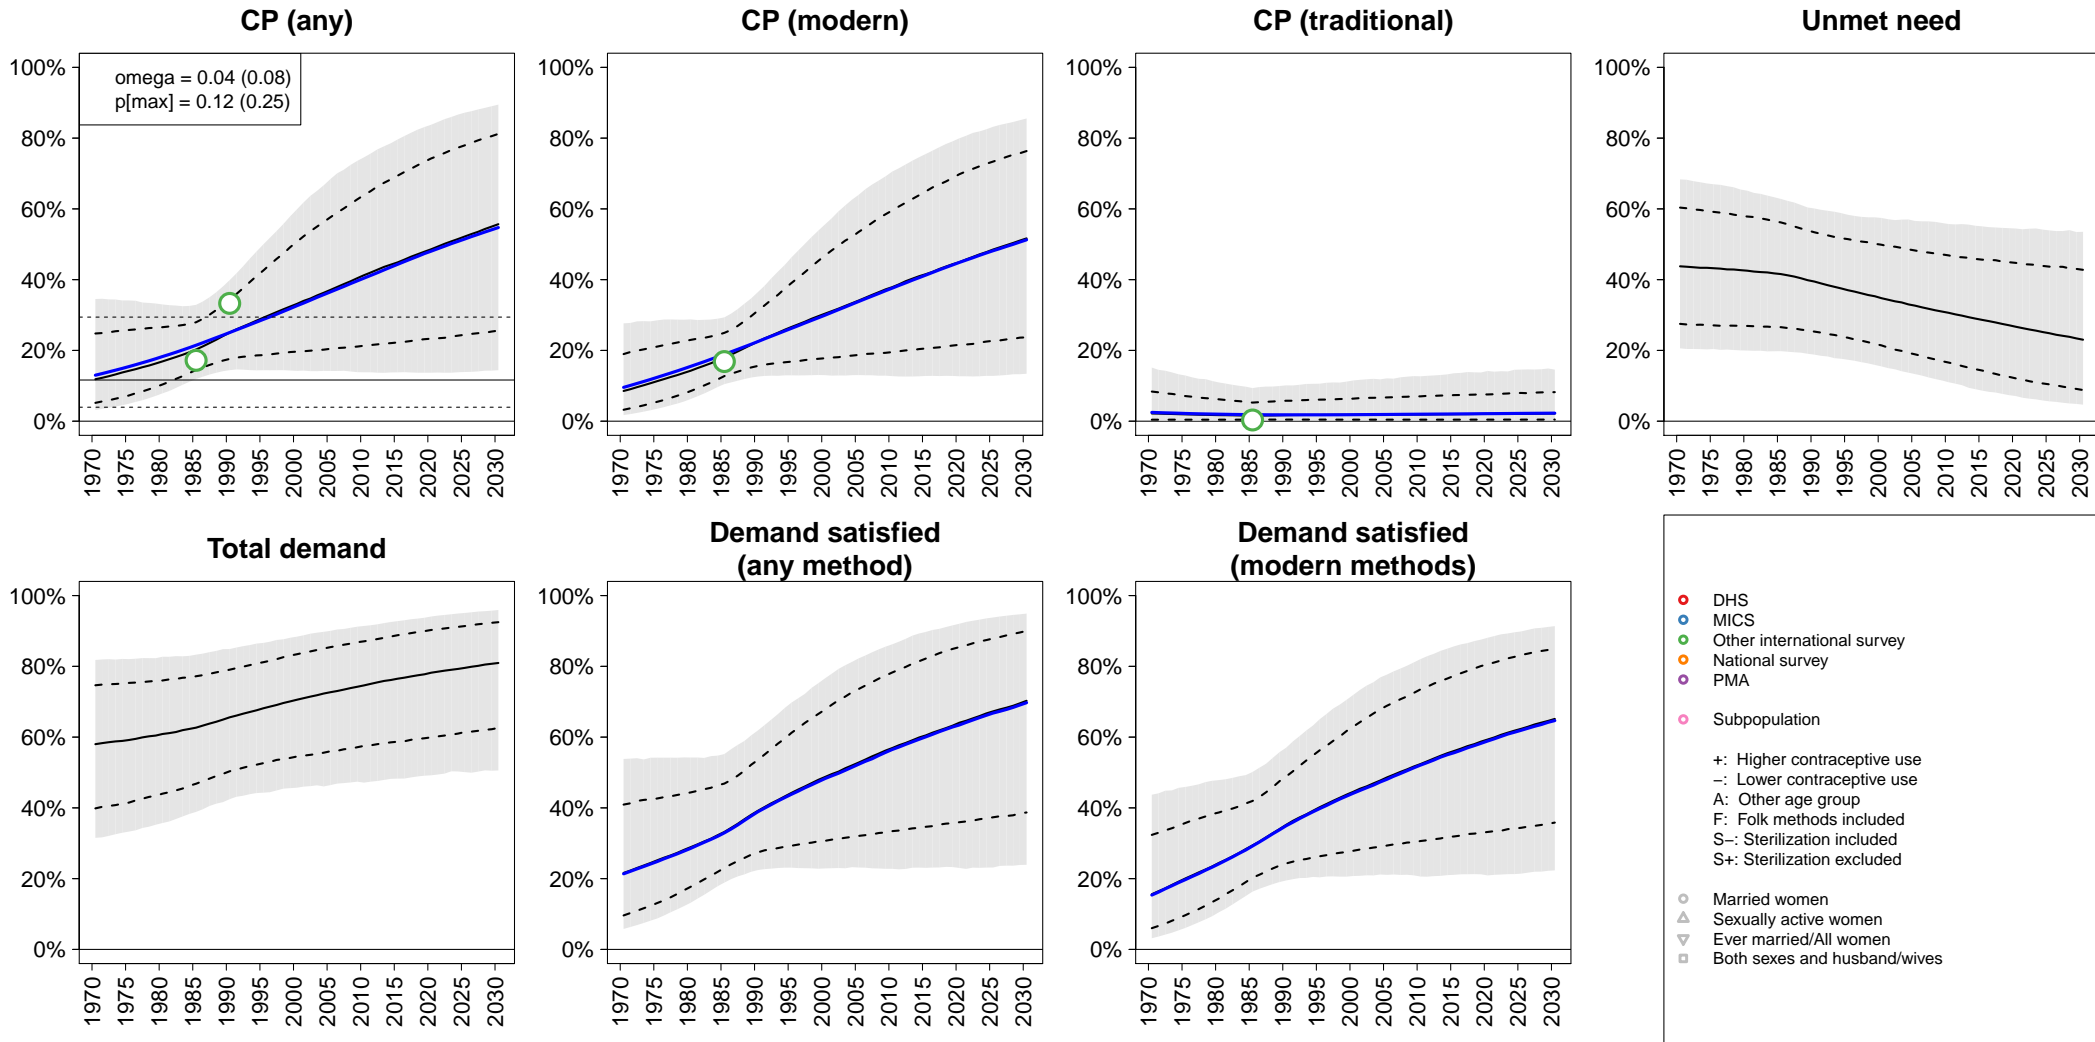

Guatemala (Central America) --- Married / In-Union

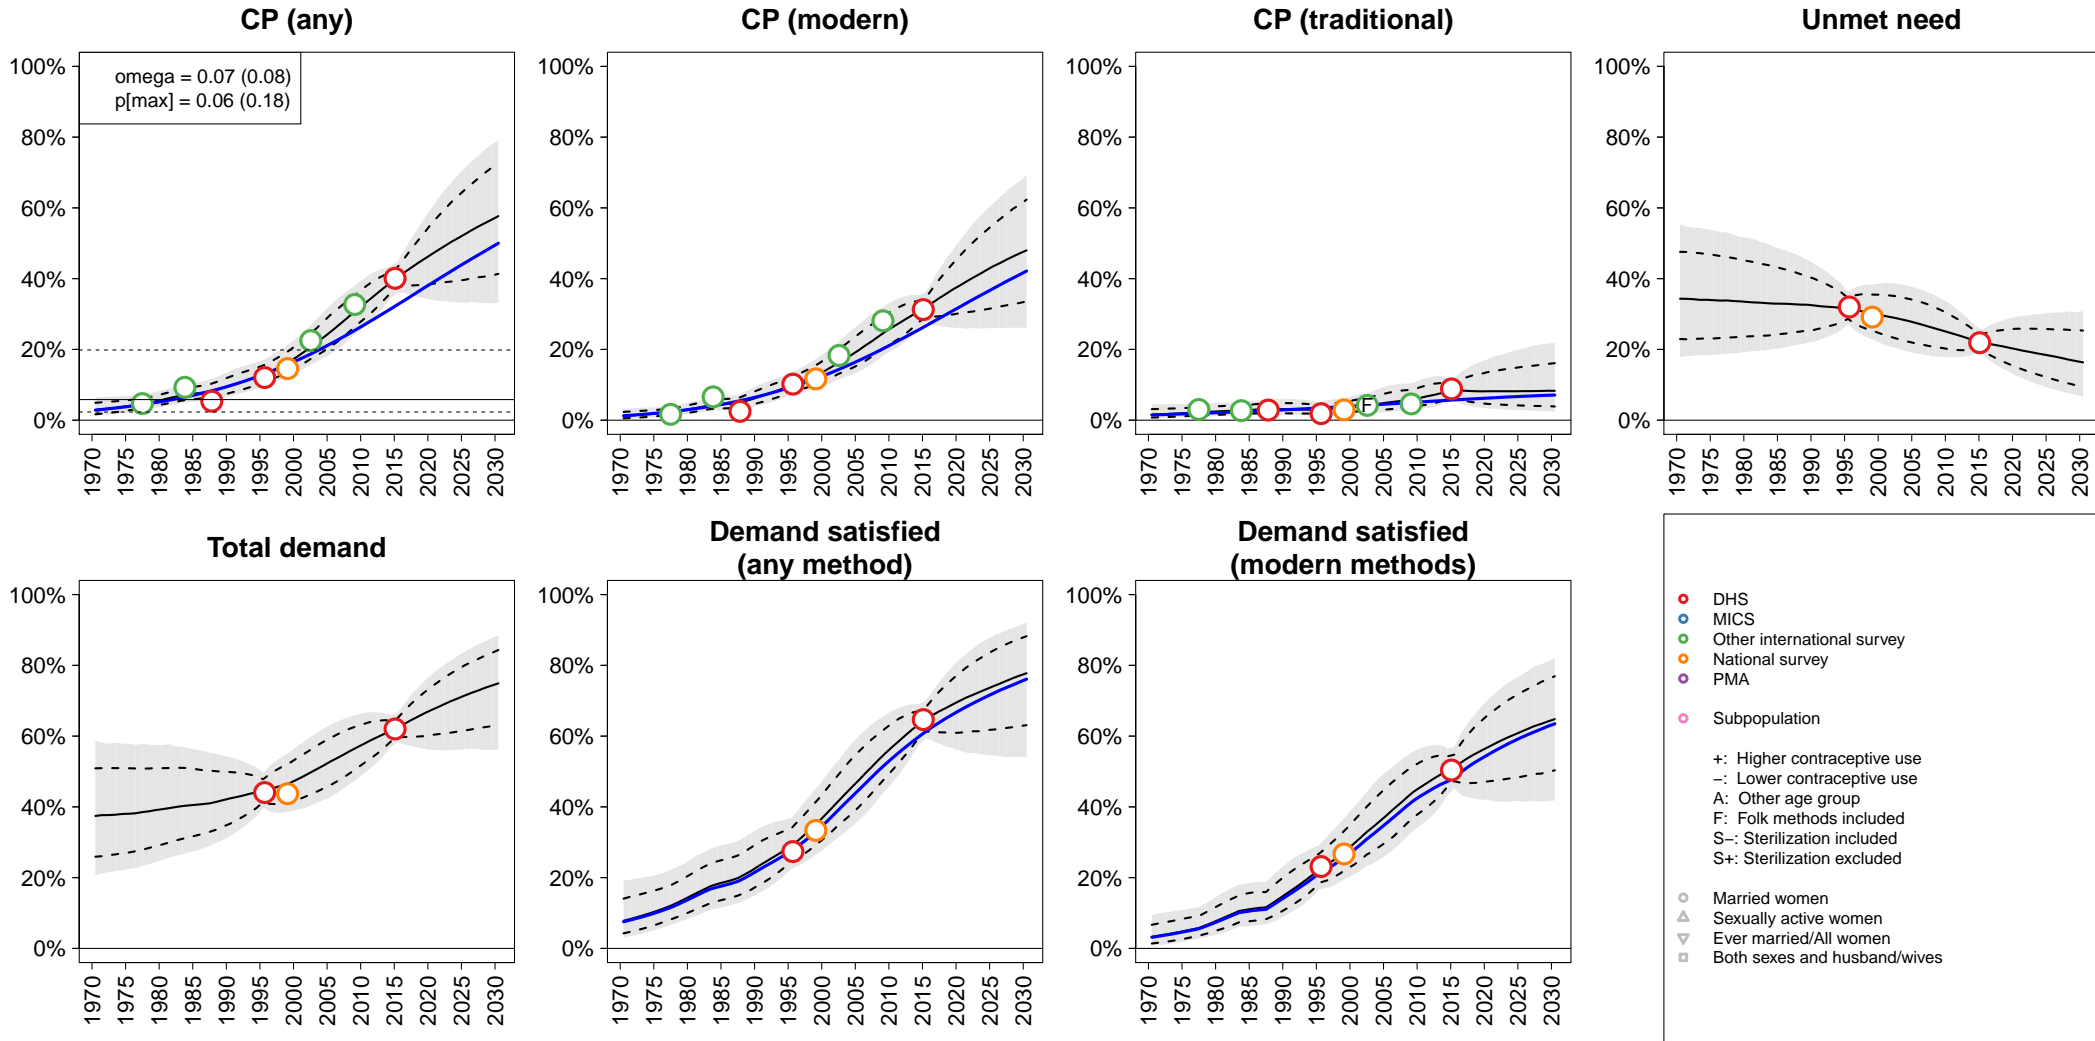



Guinea-Bissau (Western Africa) --- Married / In-Union

CP (any)

CP (modern)

CP (traditional)

Unmet need

Total demand

Demand satisfied (any method)

Demand satisfied (modern methods)

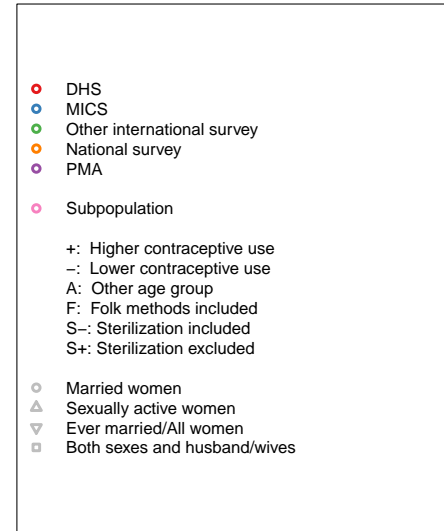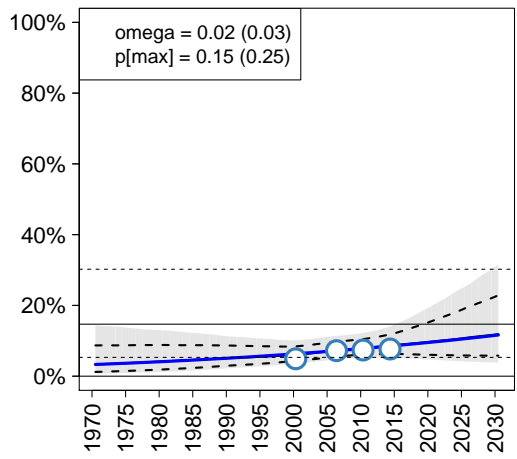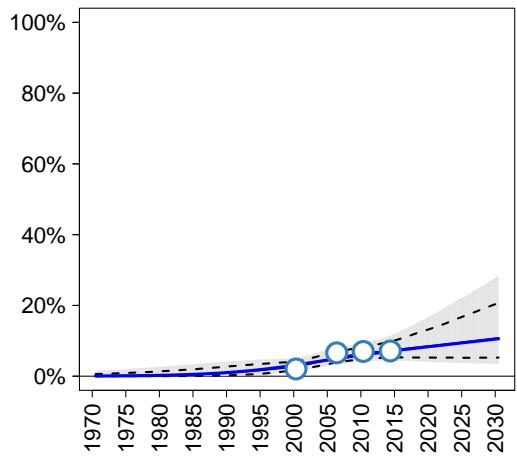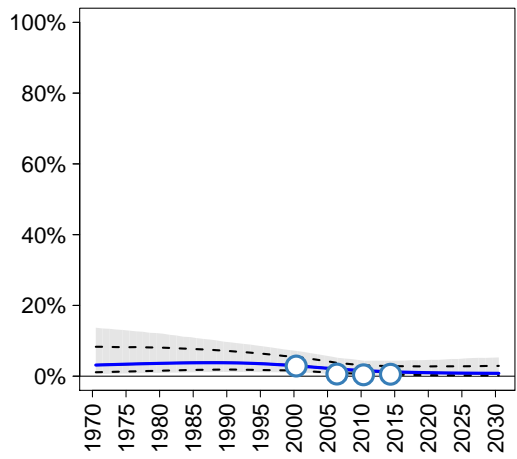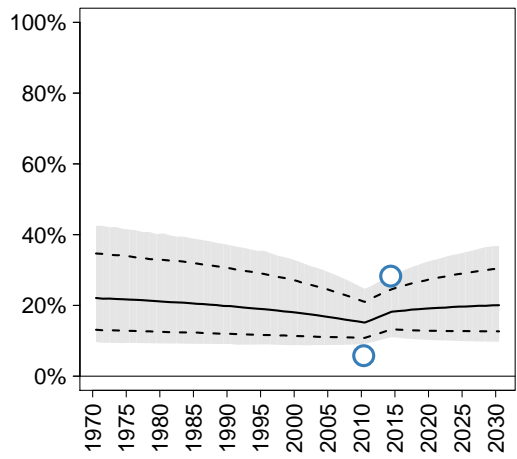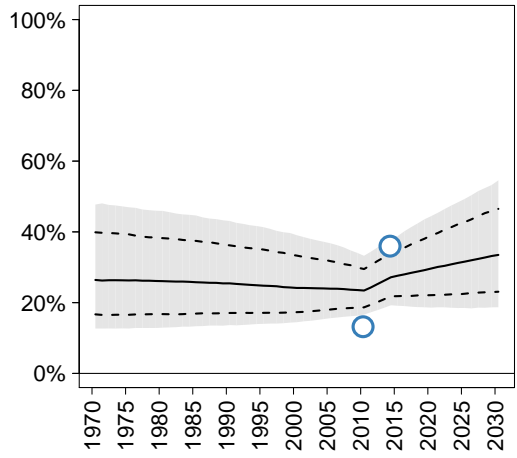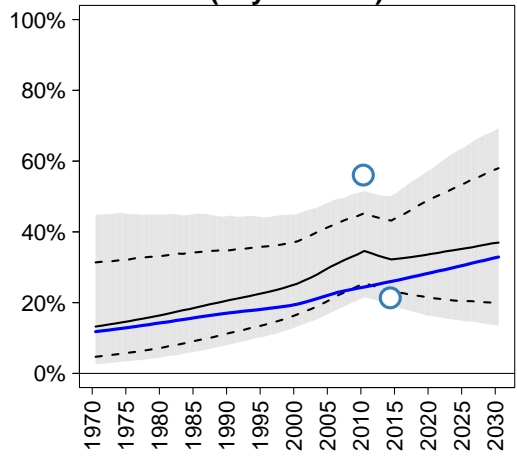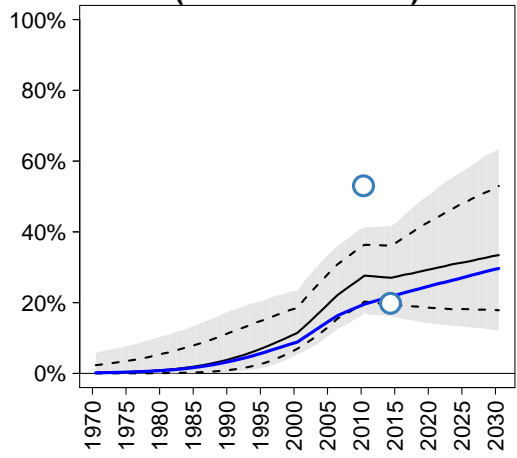

### Guinea (Western Africa) --- Married / In-Union

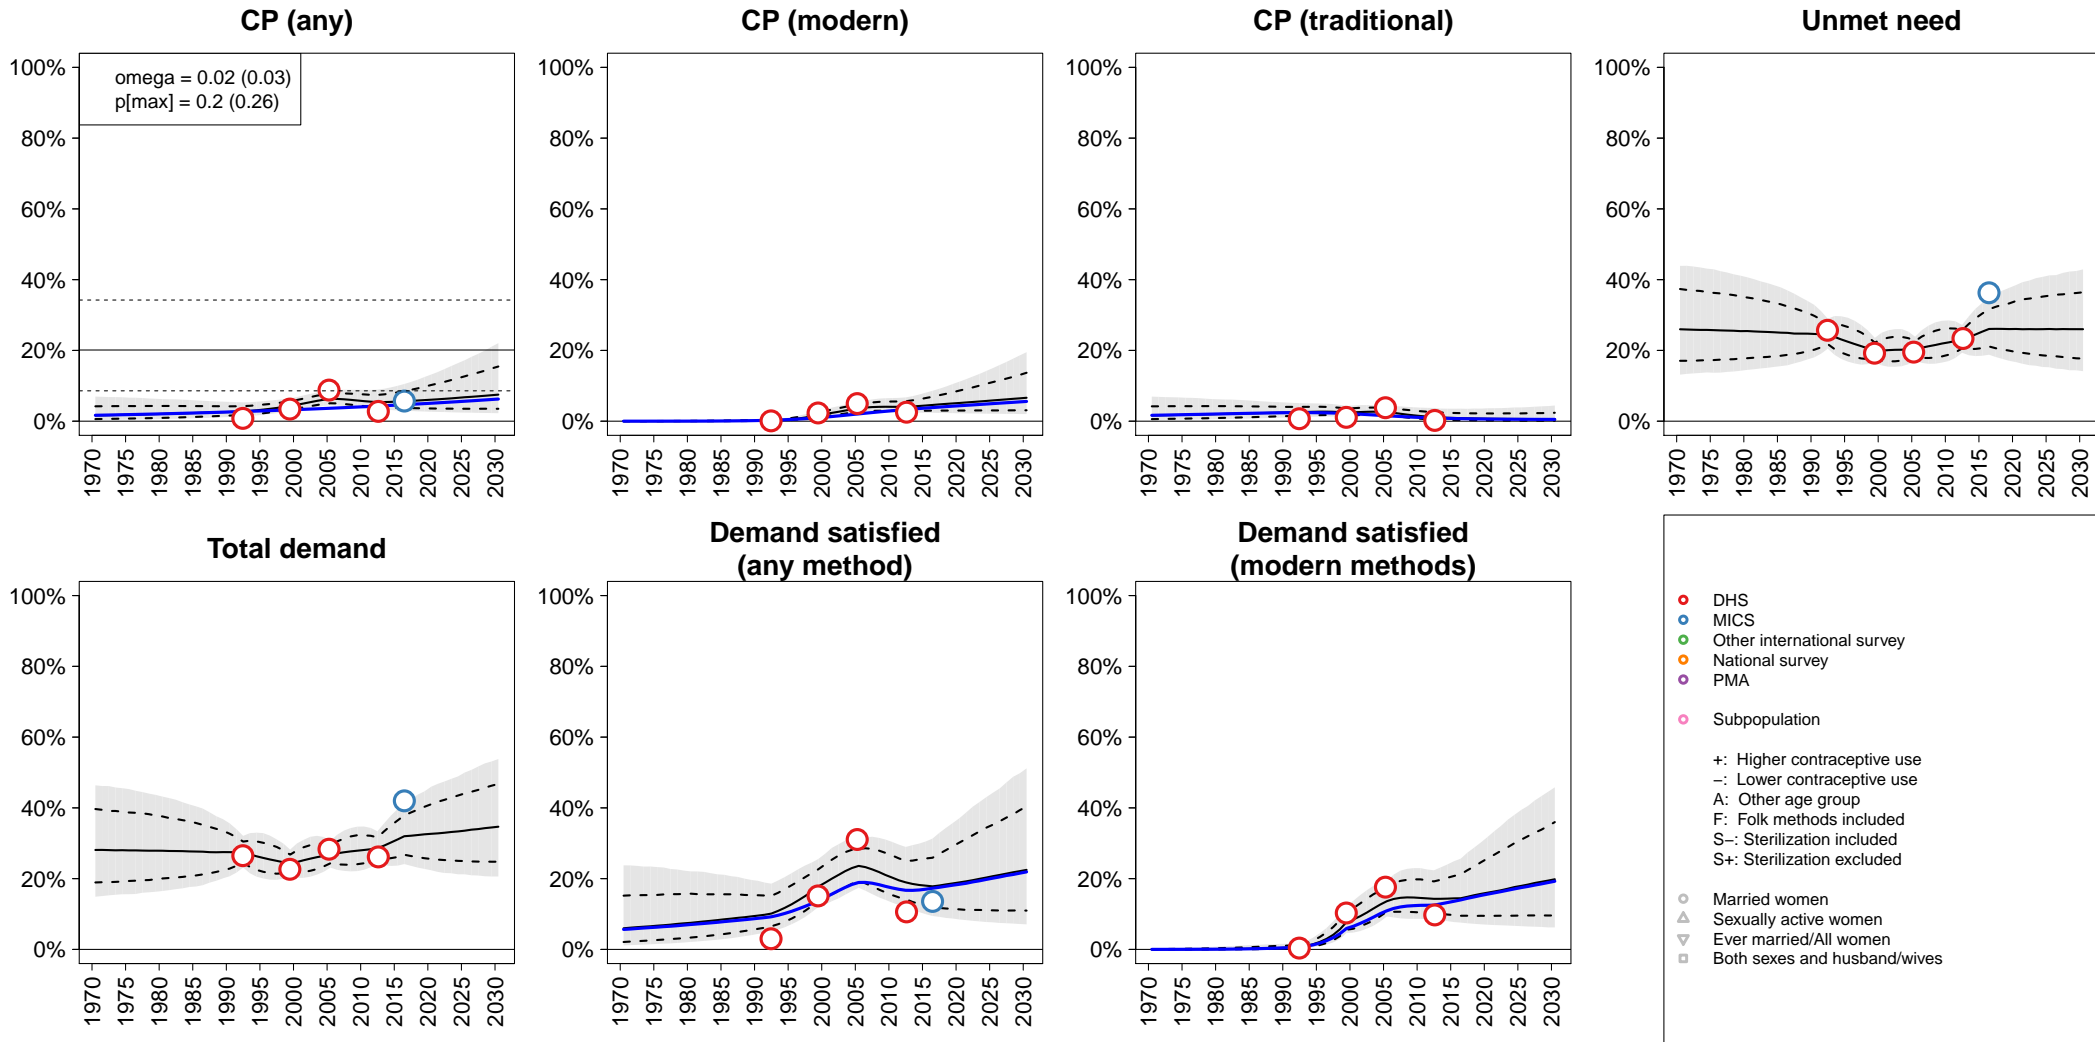

Guyana (South America) --- Married / In-Union

CP (any)

CP (modern)

CP (traditional)

Unmet need

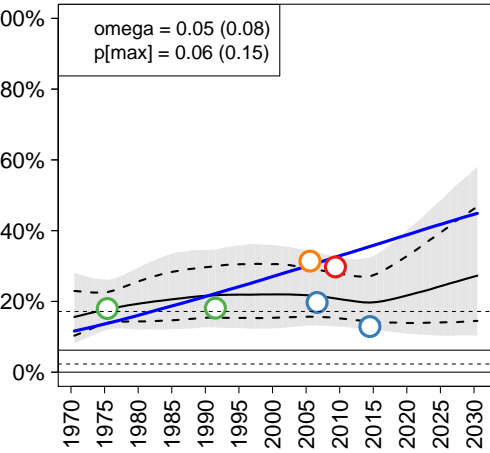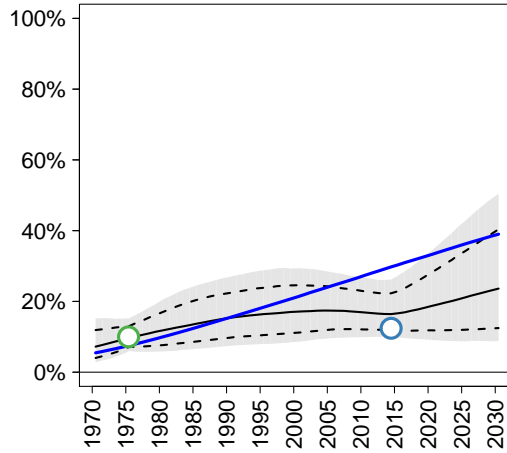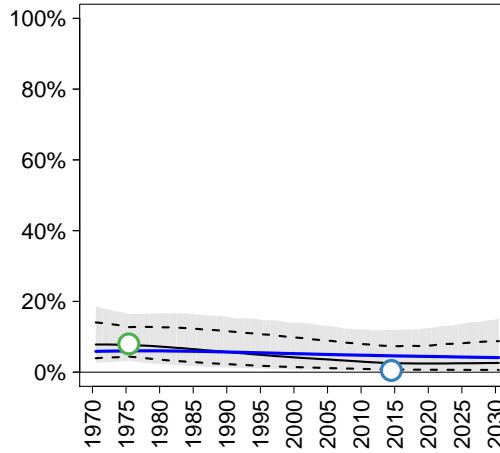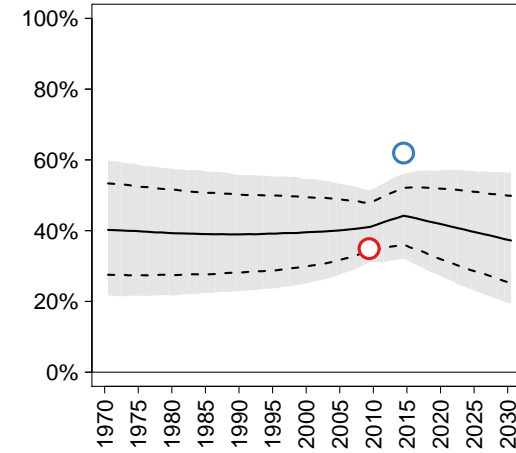

Total demand

Demand satisfied (any method)

Demand satisfied (modern methods)

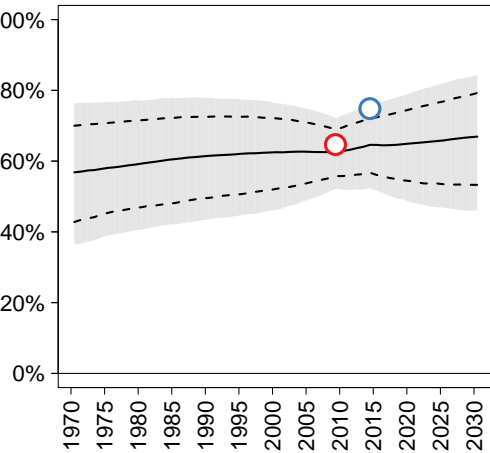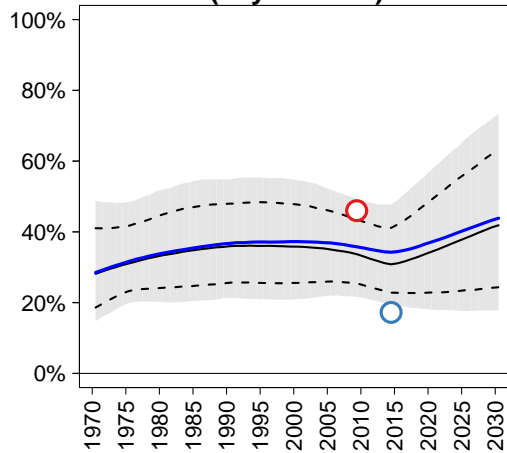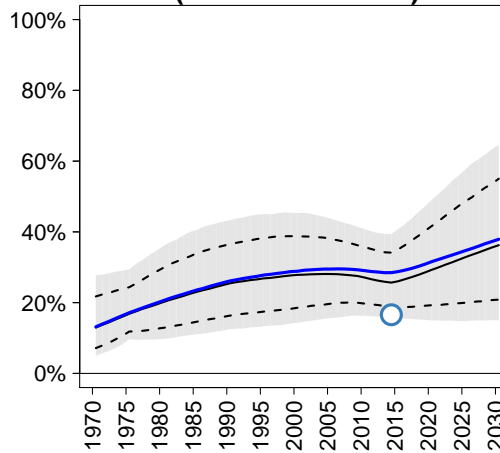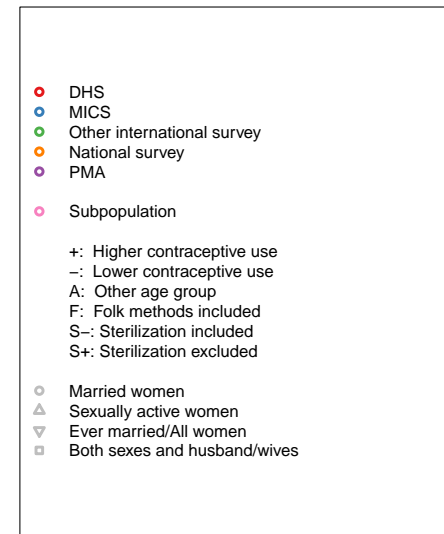

Haiti (Caribbean) --- Married / In-Union

CP (any)

CP (modern)

CP (traditional)

Unmet need

Total demand

Demand satisfied (any method)

Demand satisfied (modern methods)

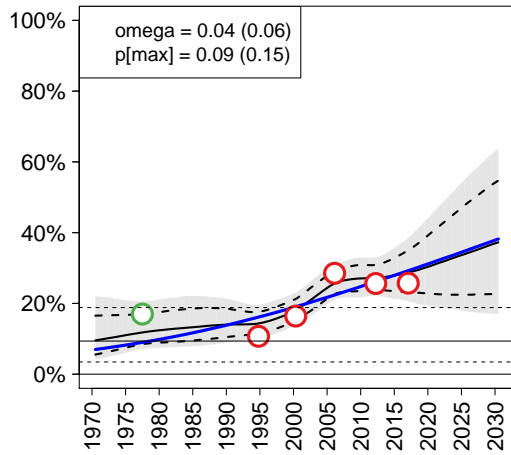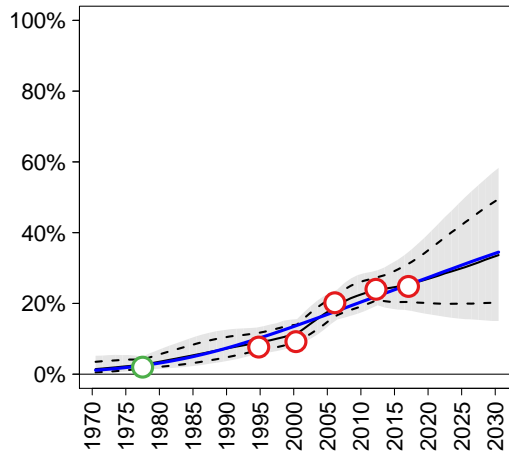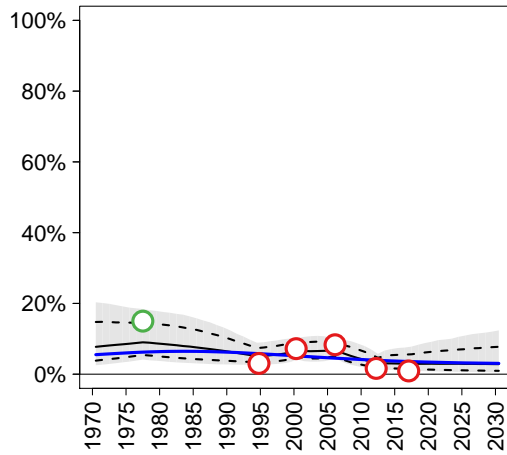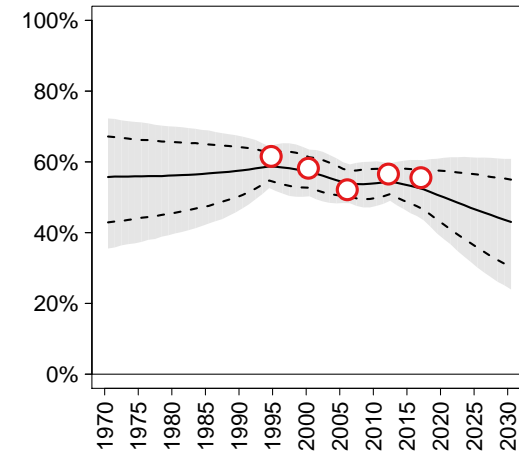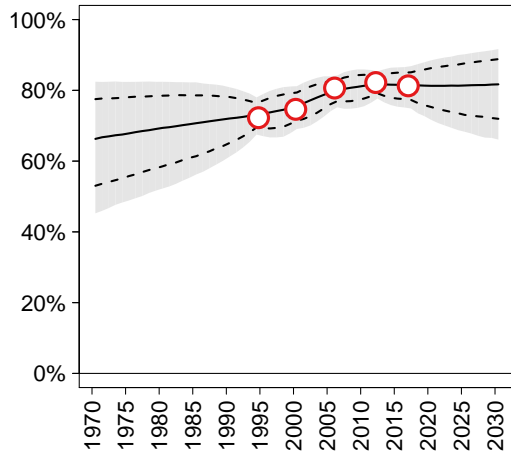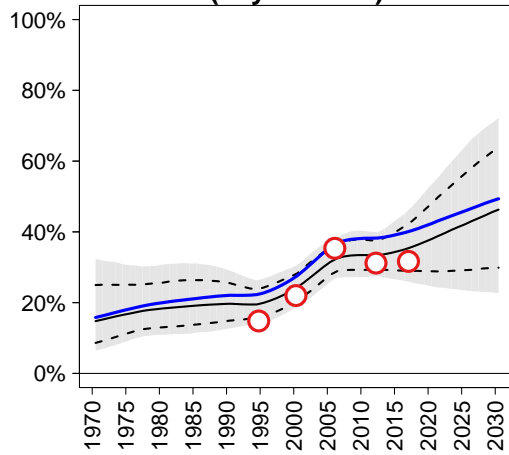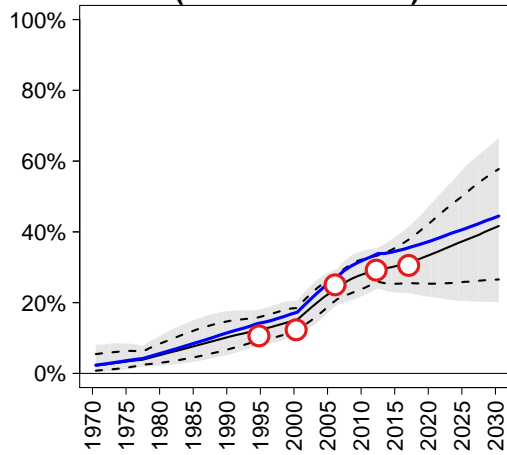

- DHS
- MICS
- Other international survey
- National survey
- PMA
- Subpopulation
- + : Higher contraceptive use
- : Lower contraceptive use
- A : Other age group
- F : Folk methods included
- S- : Sterilization included
- S+ : Sterilization excluded
- Married women
- △ Sexually active women
- ▽ Ever married/All women
- Both sexes and husband/wives

Honduras (Central America) --- Married / In-Union

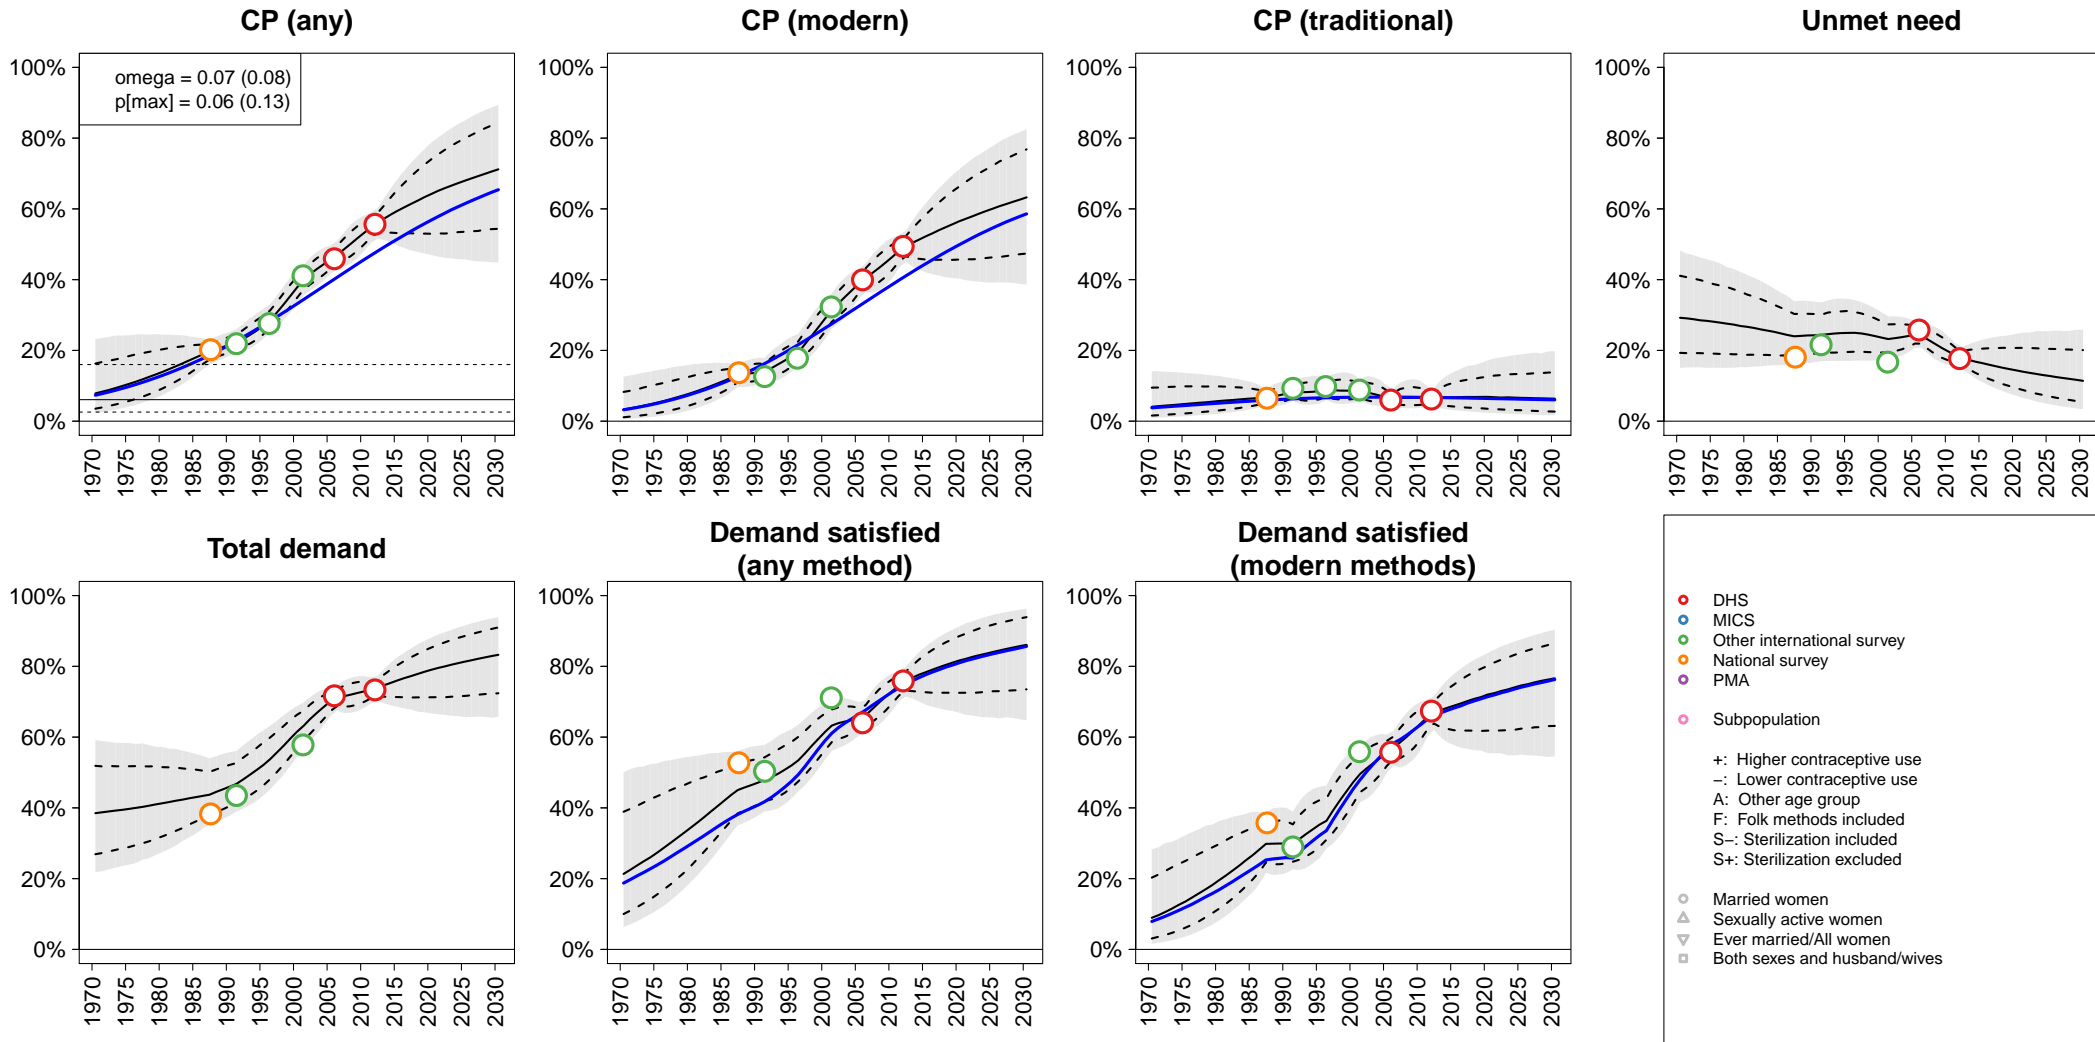

India (Southern Asia) --- Married / In-Union

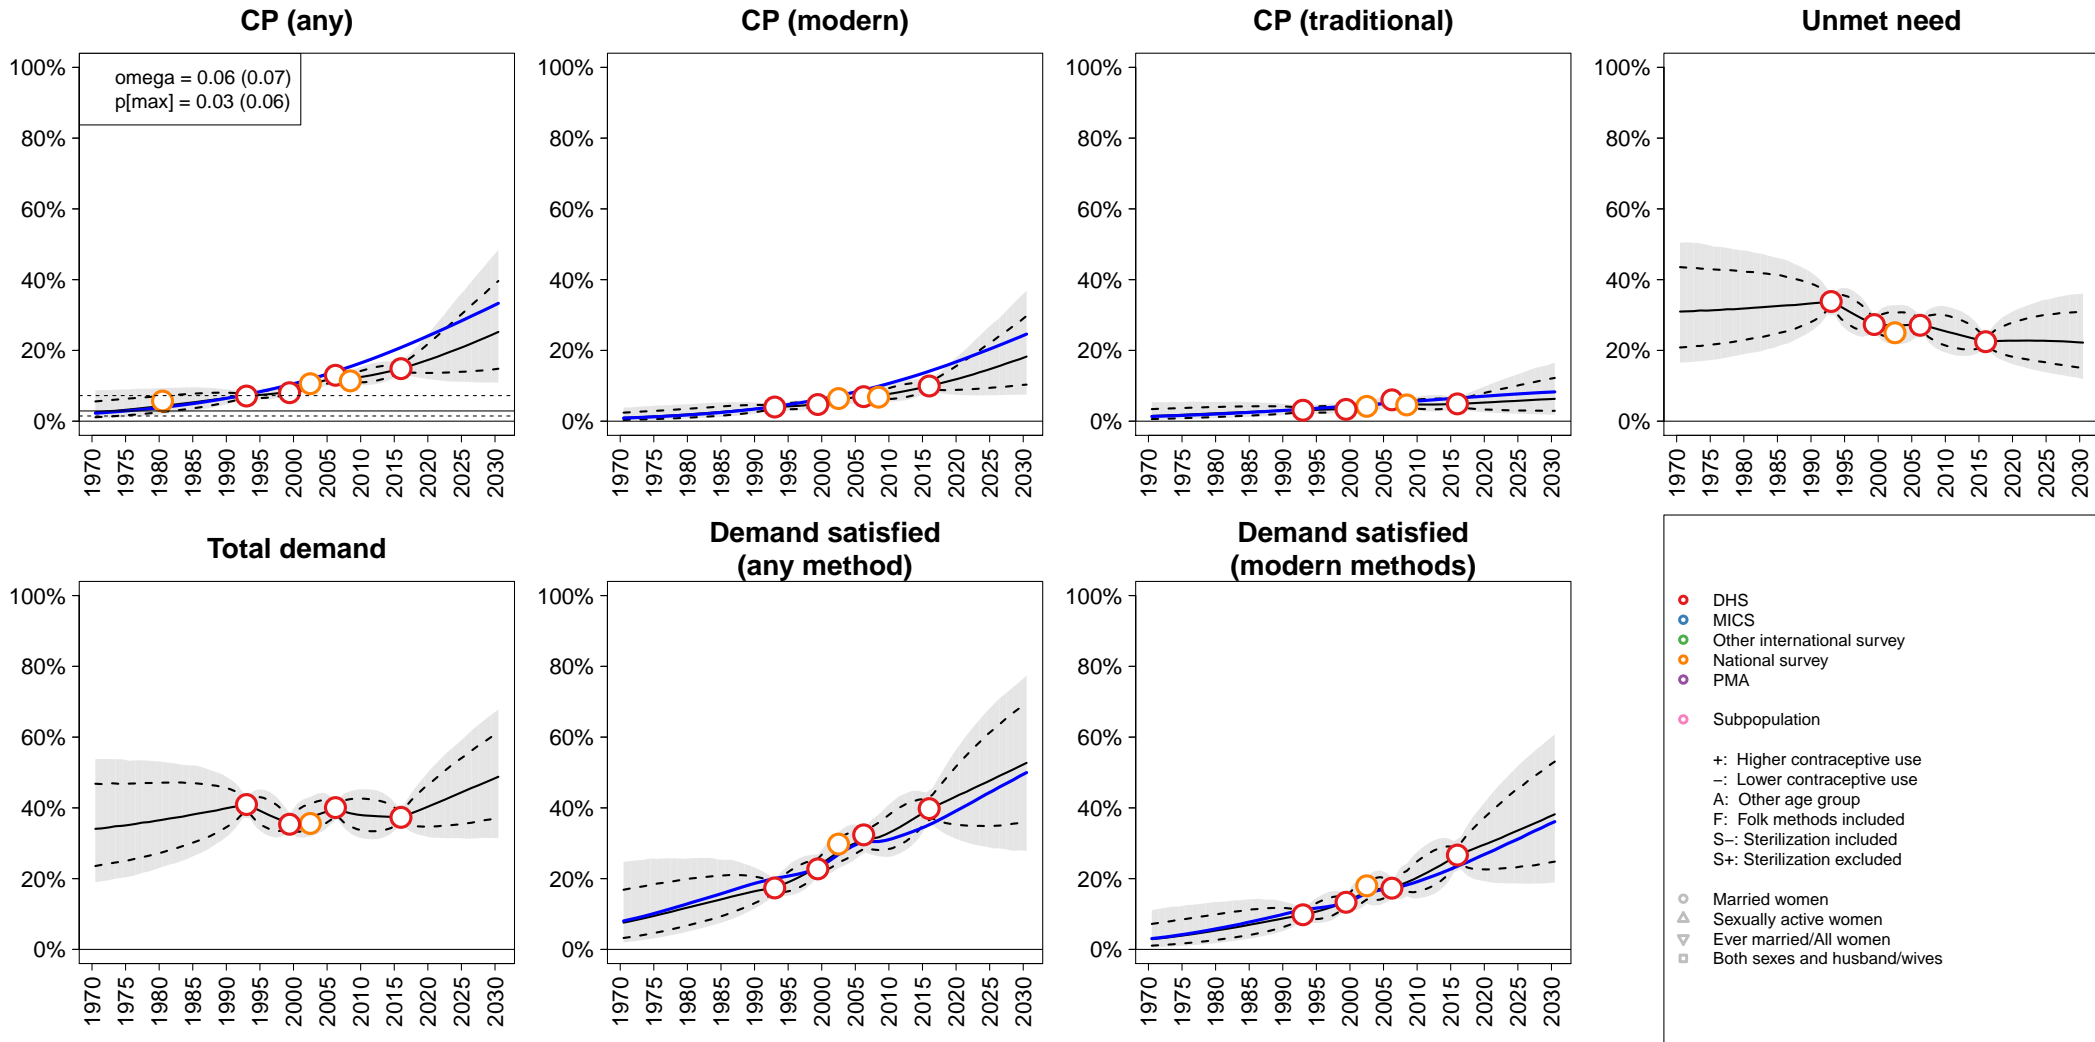

Indonesia (South-eastern Asia) --- Married / In-Union

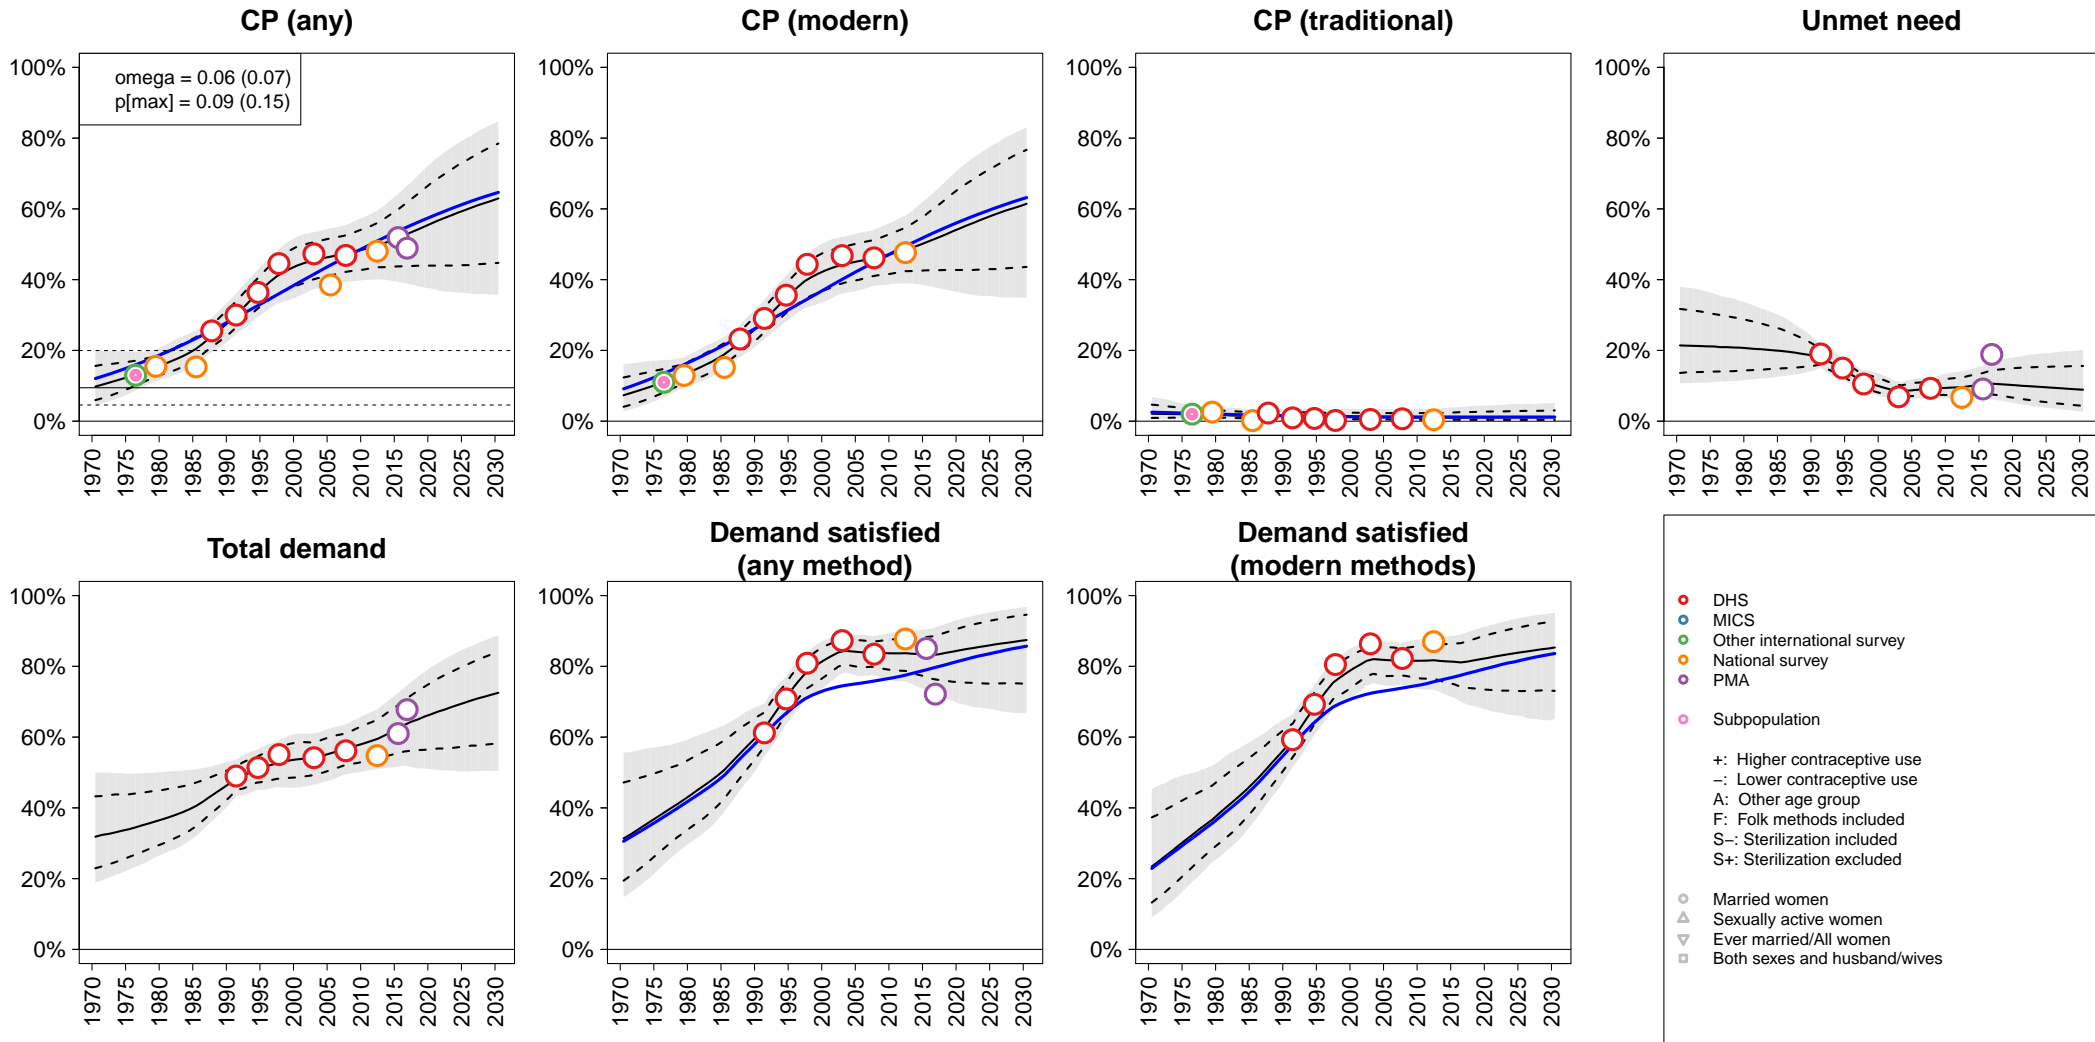

Iran, Islamic Republic of (Southern Asia) --- Married / In-Union

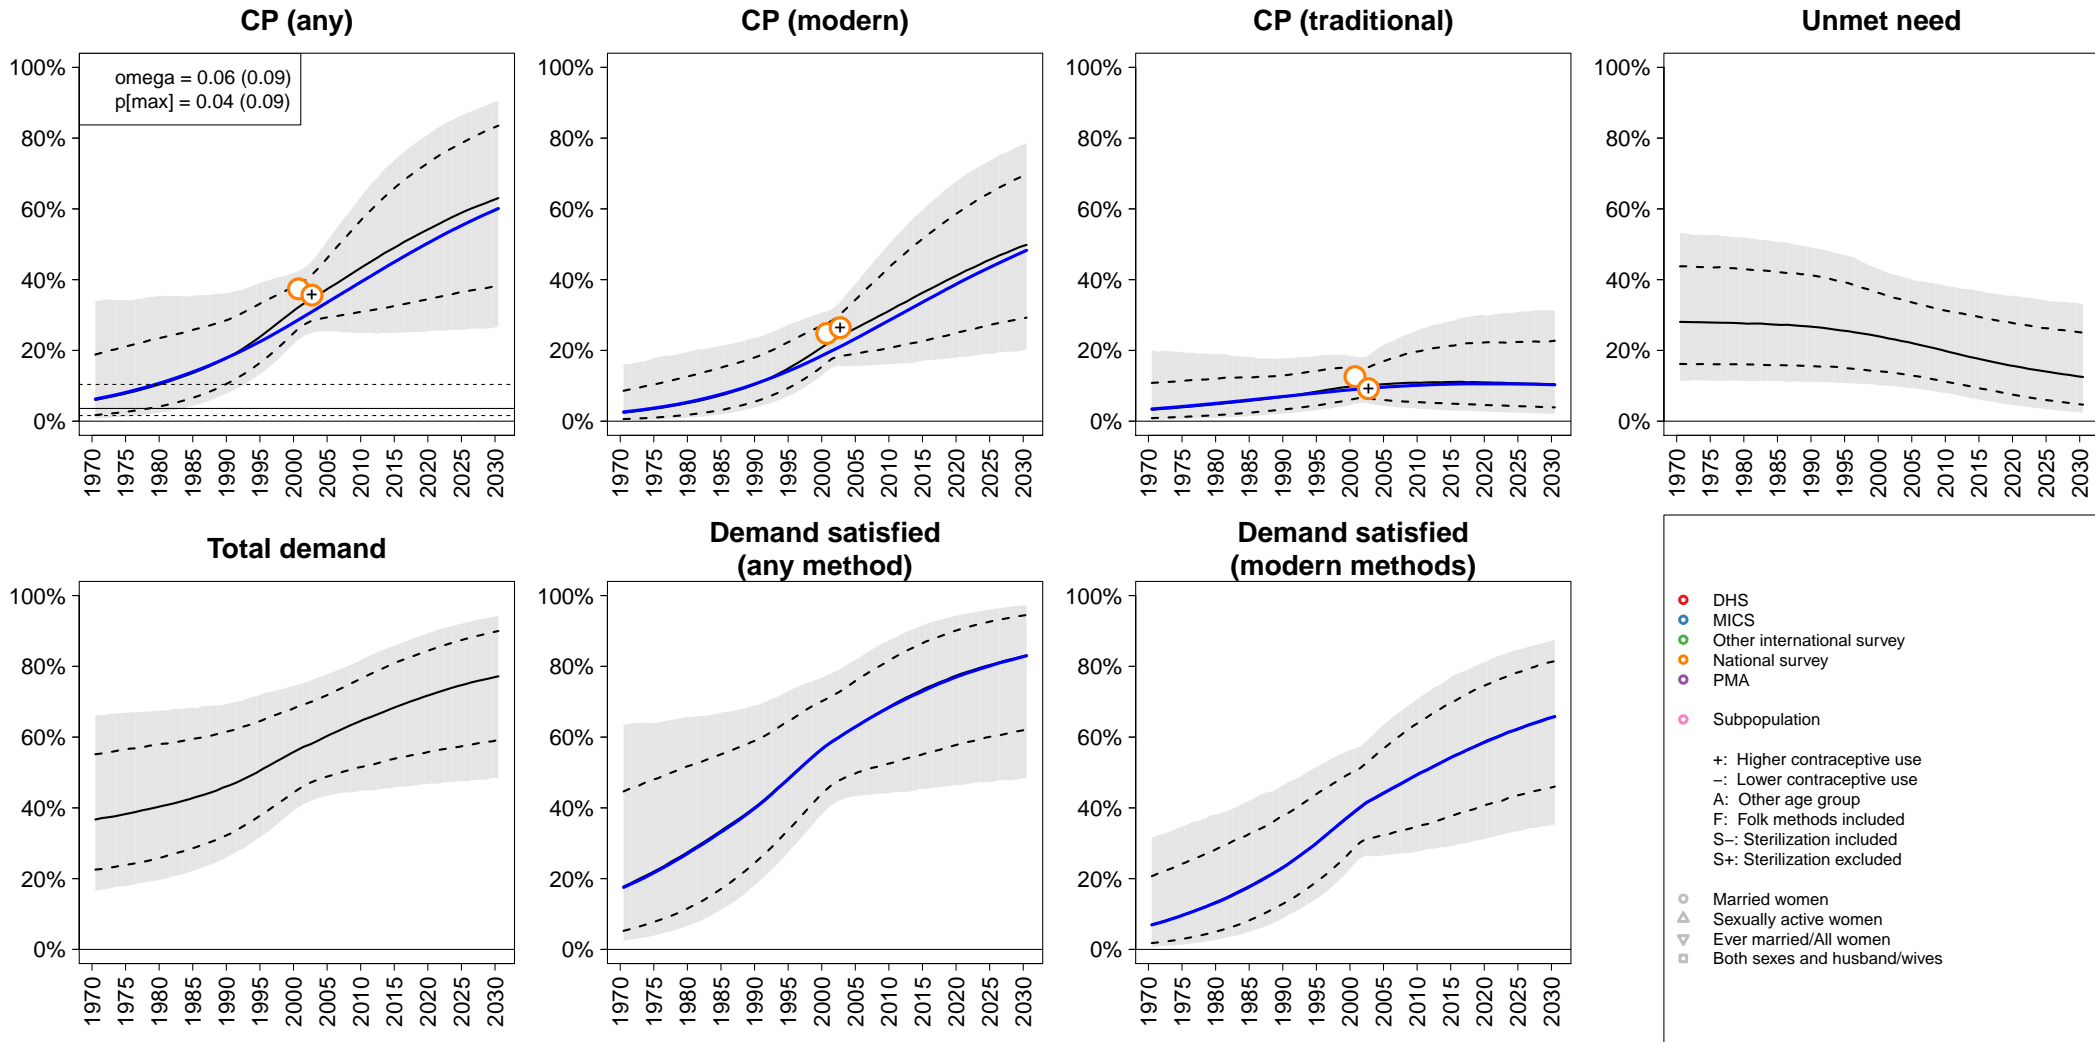



Iraq (Western Asia) --- Married / In-Union

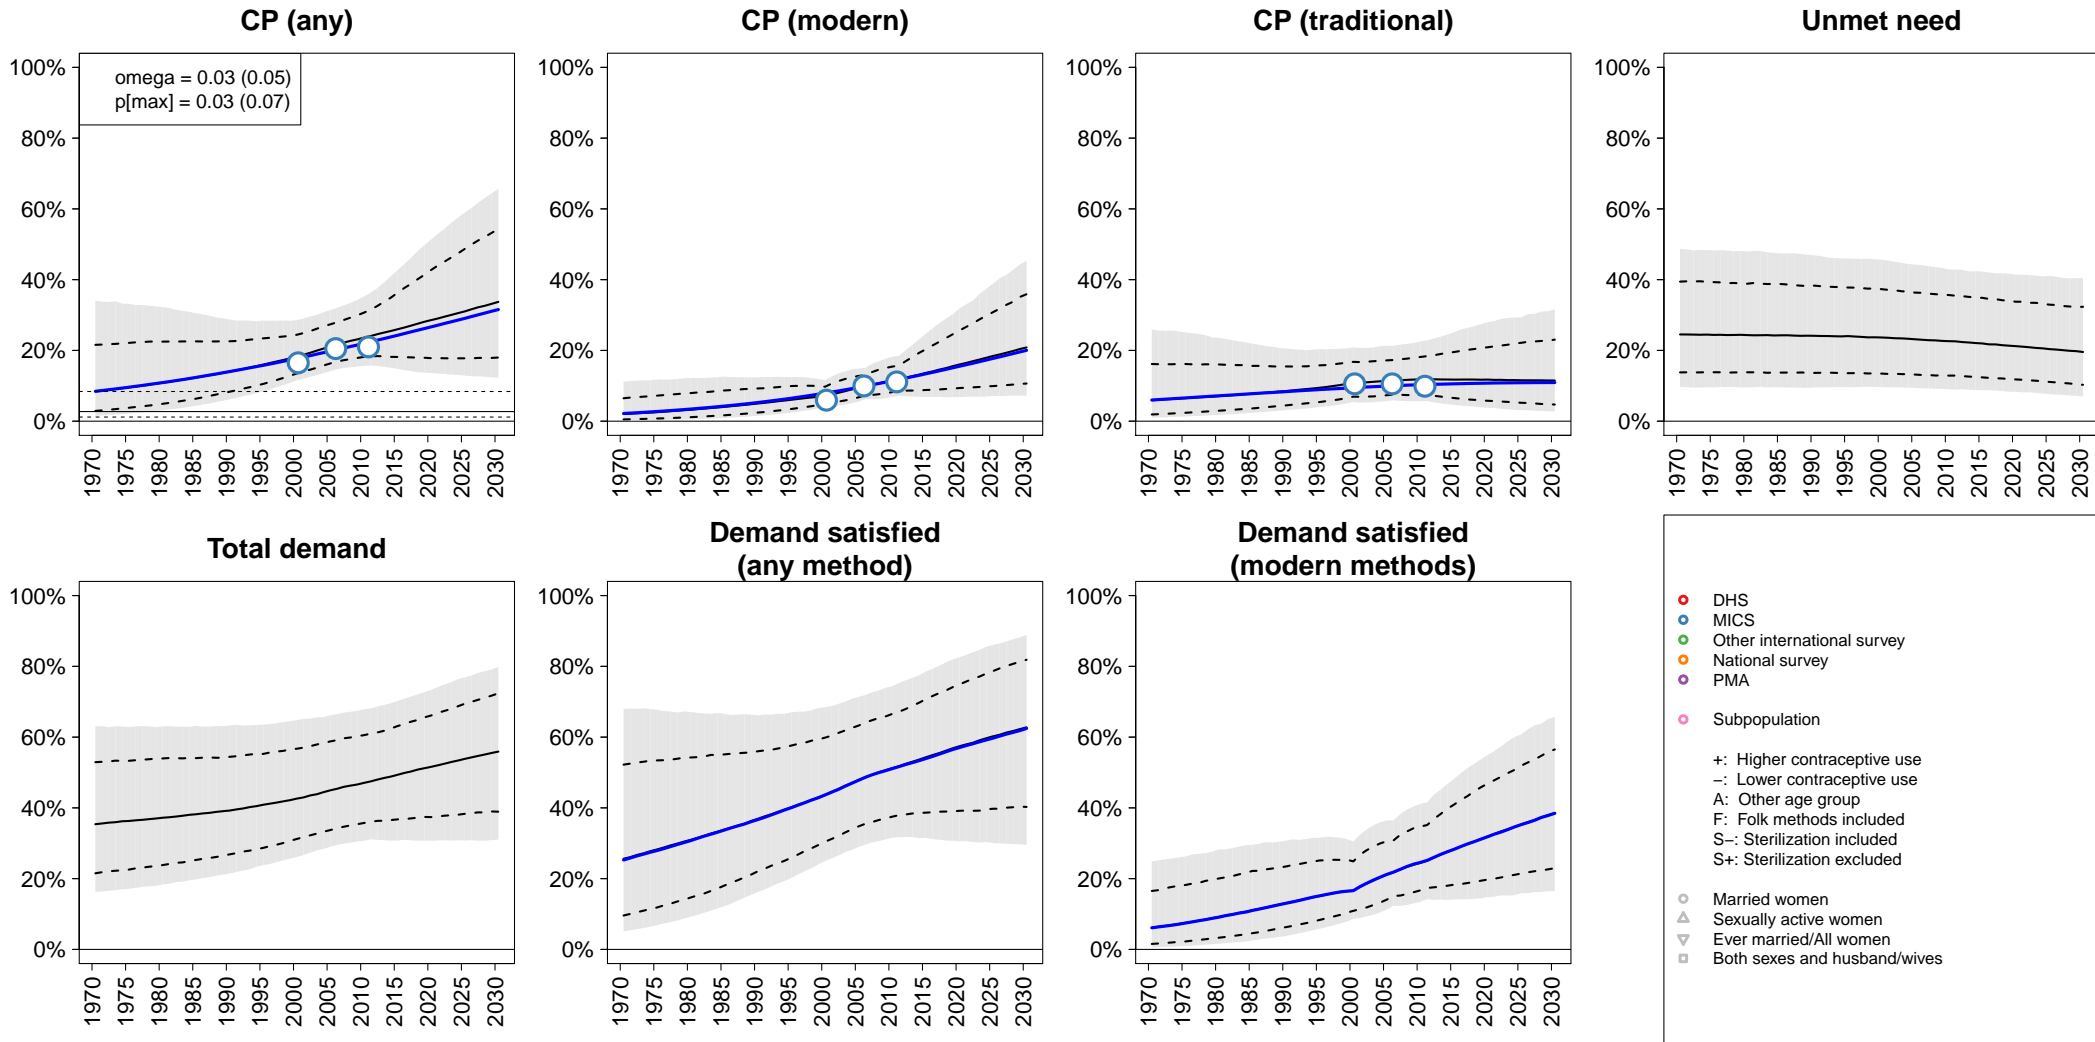

Jamaica (Caribbean) --- Married / In-Union

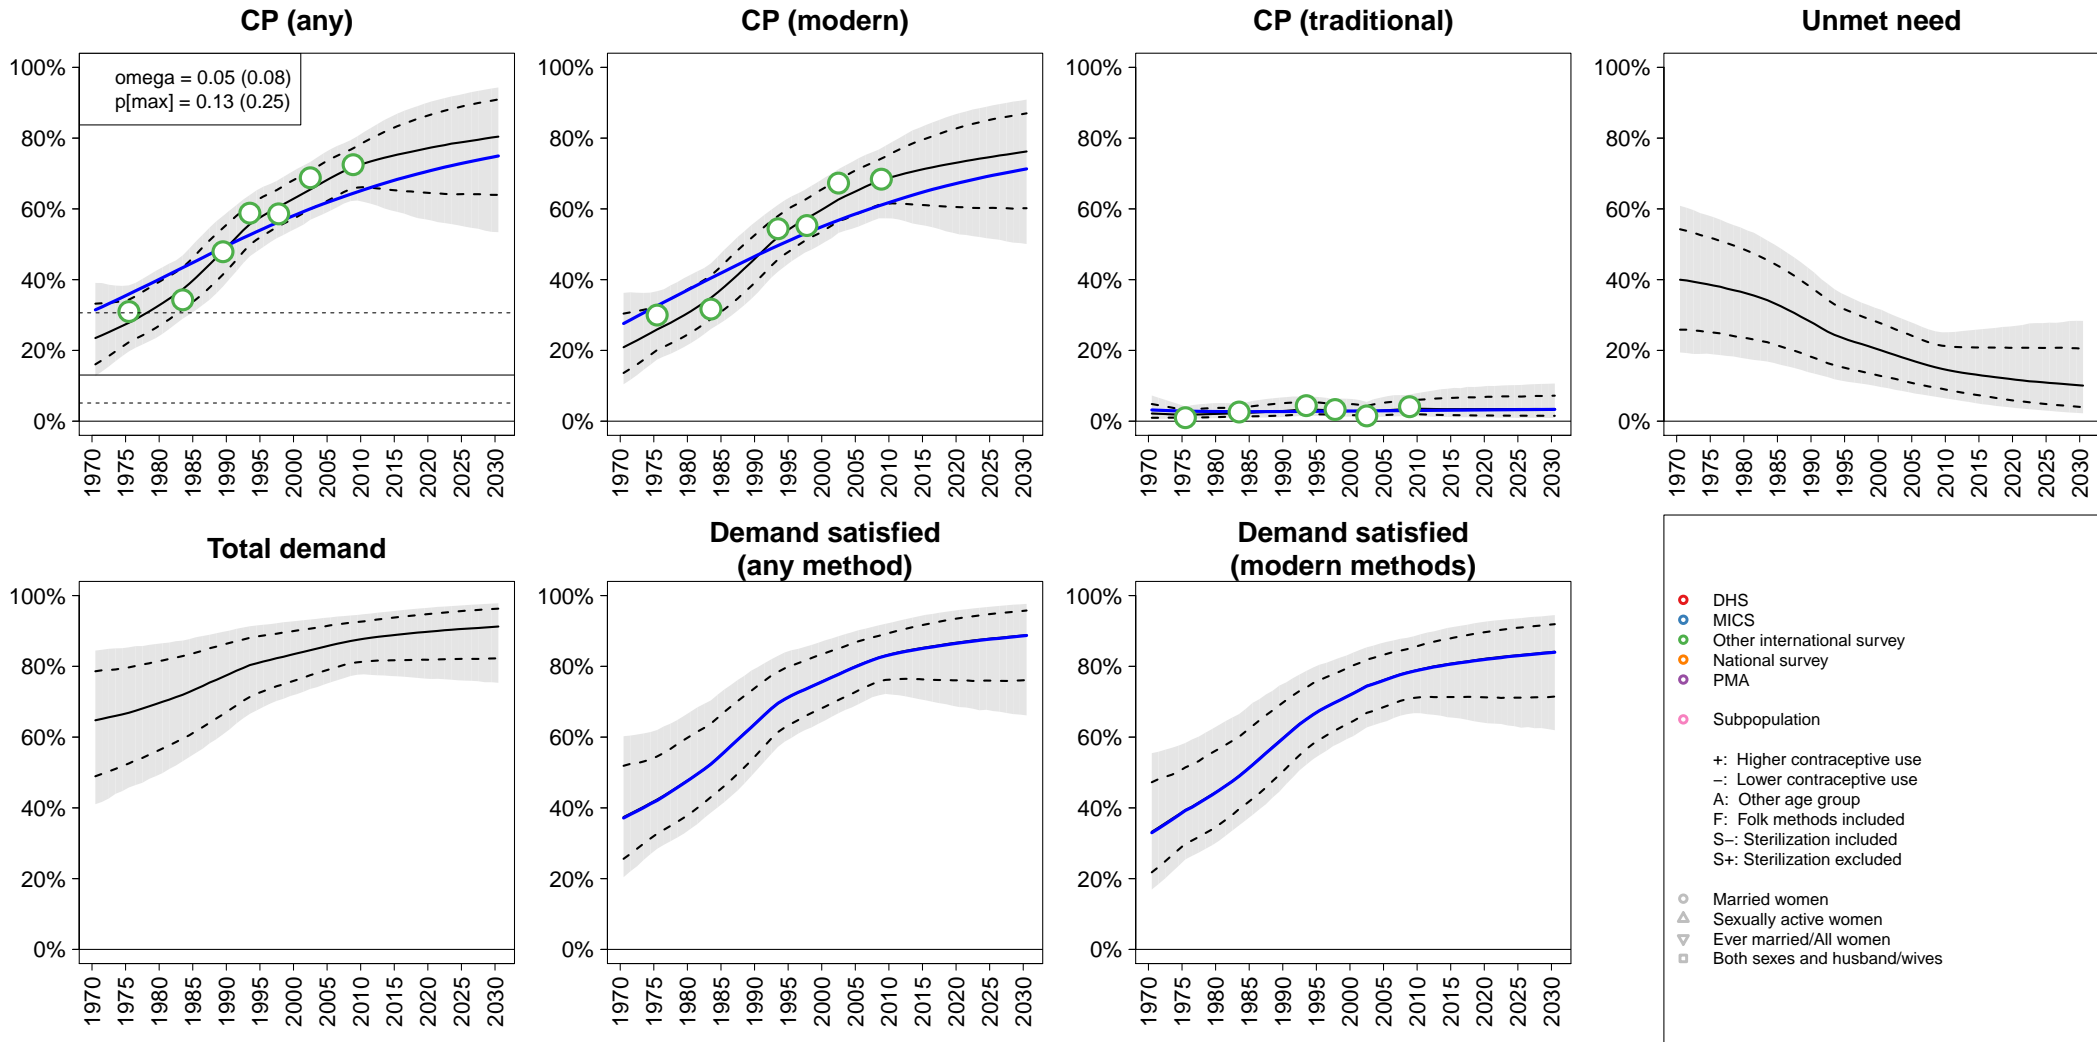

Jordan (Western Asia) --- Married / In-Union

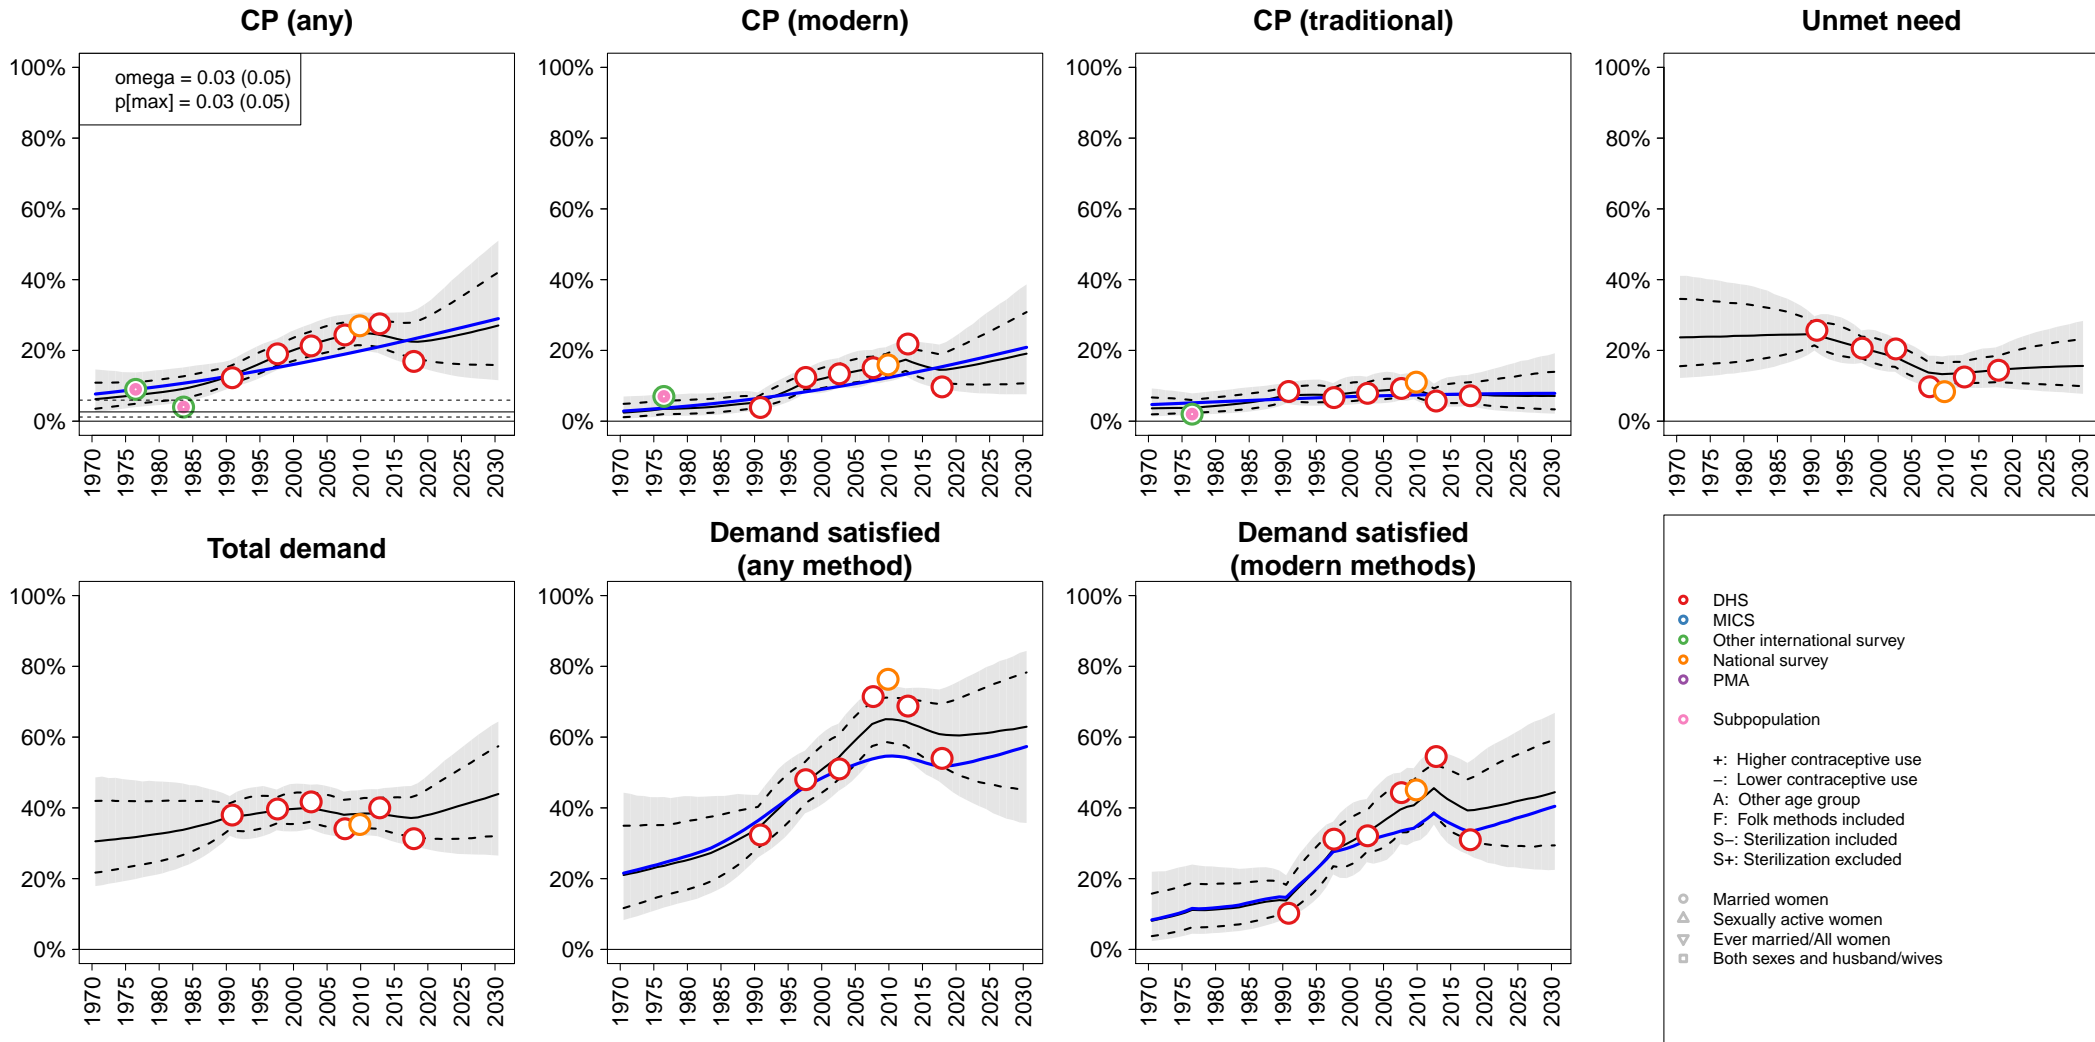

### Kazakhstan (Central Asia) — Married / In-Union

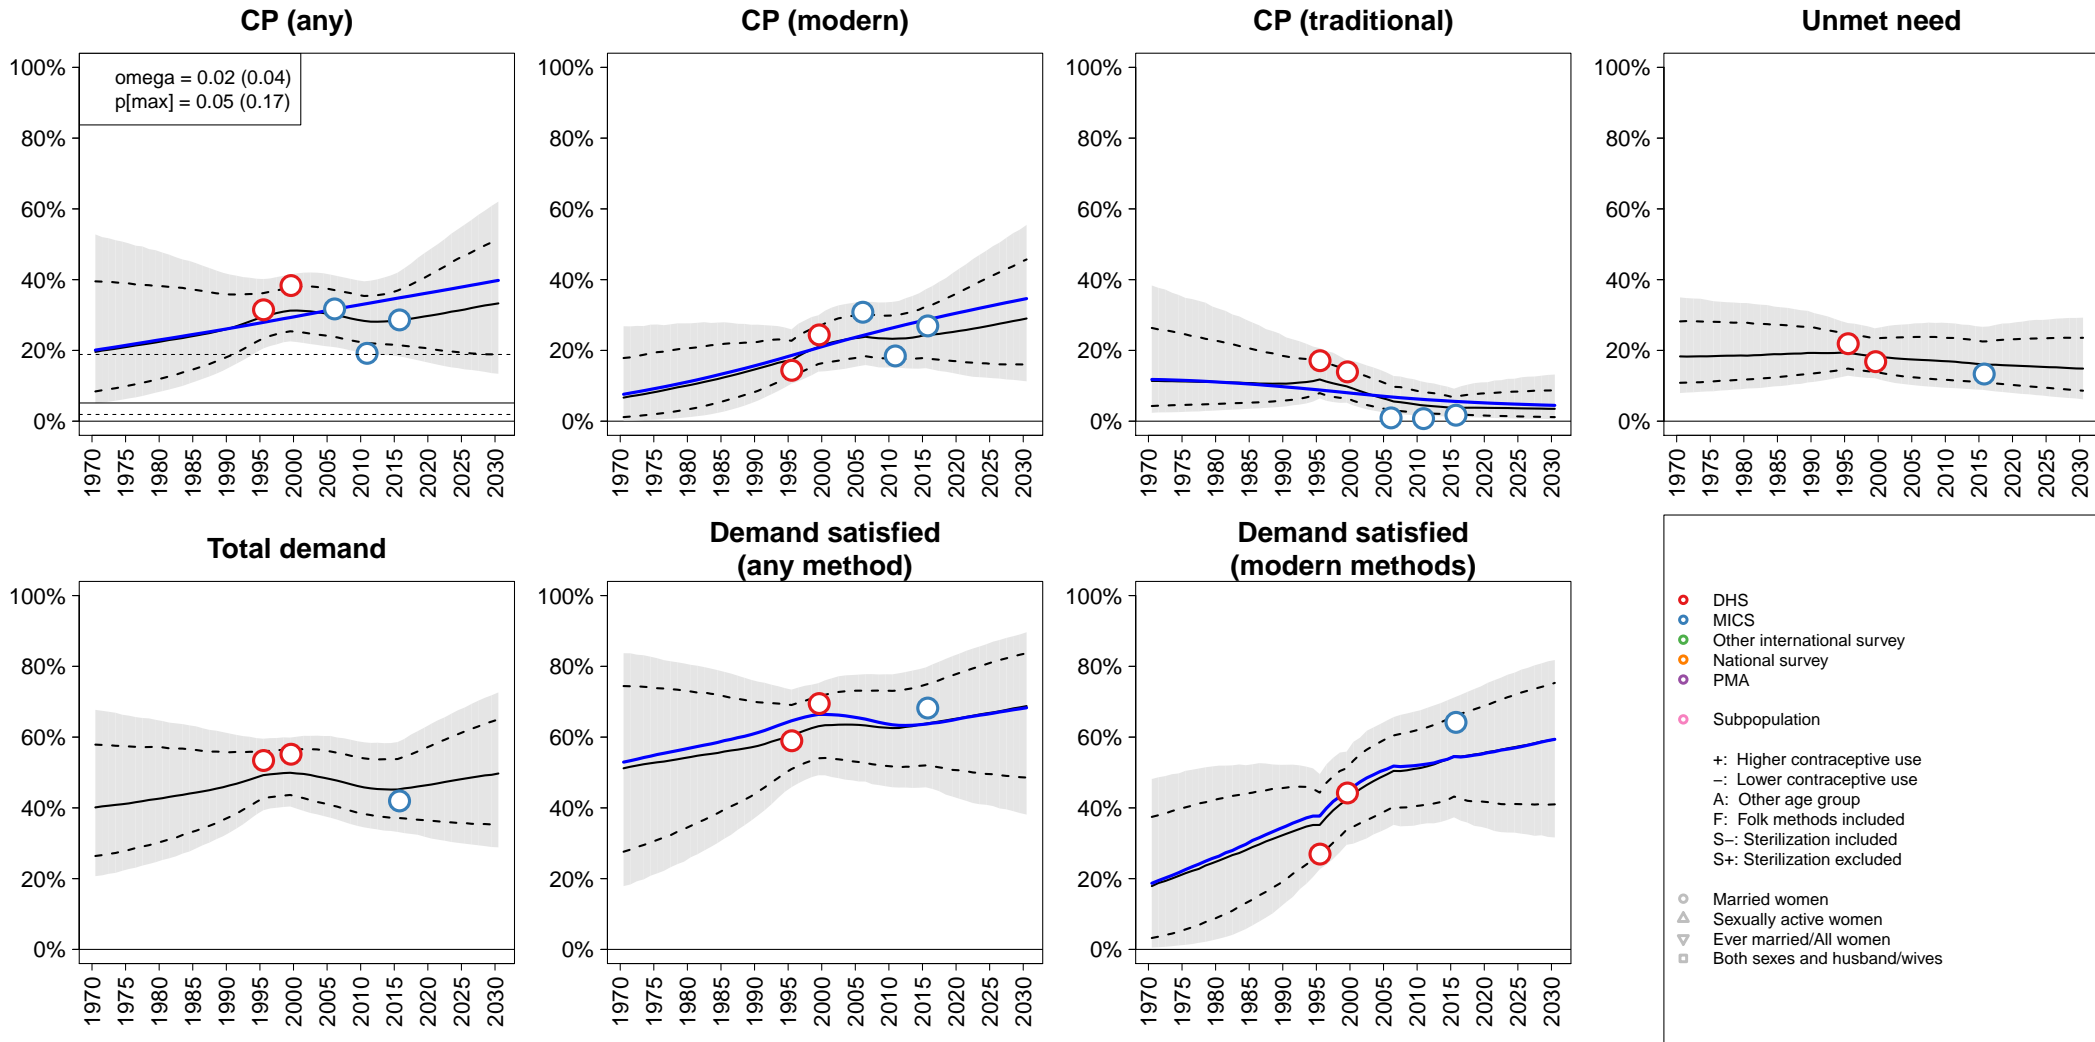

Kenya (Eastern Africa) --- Married / In-Union

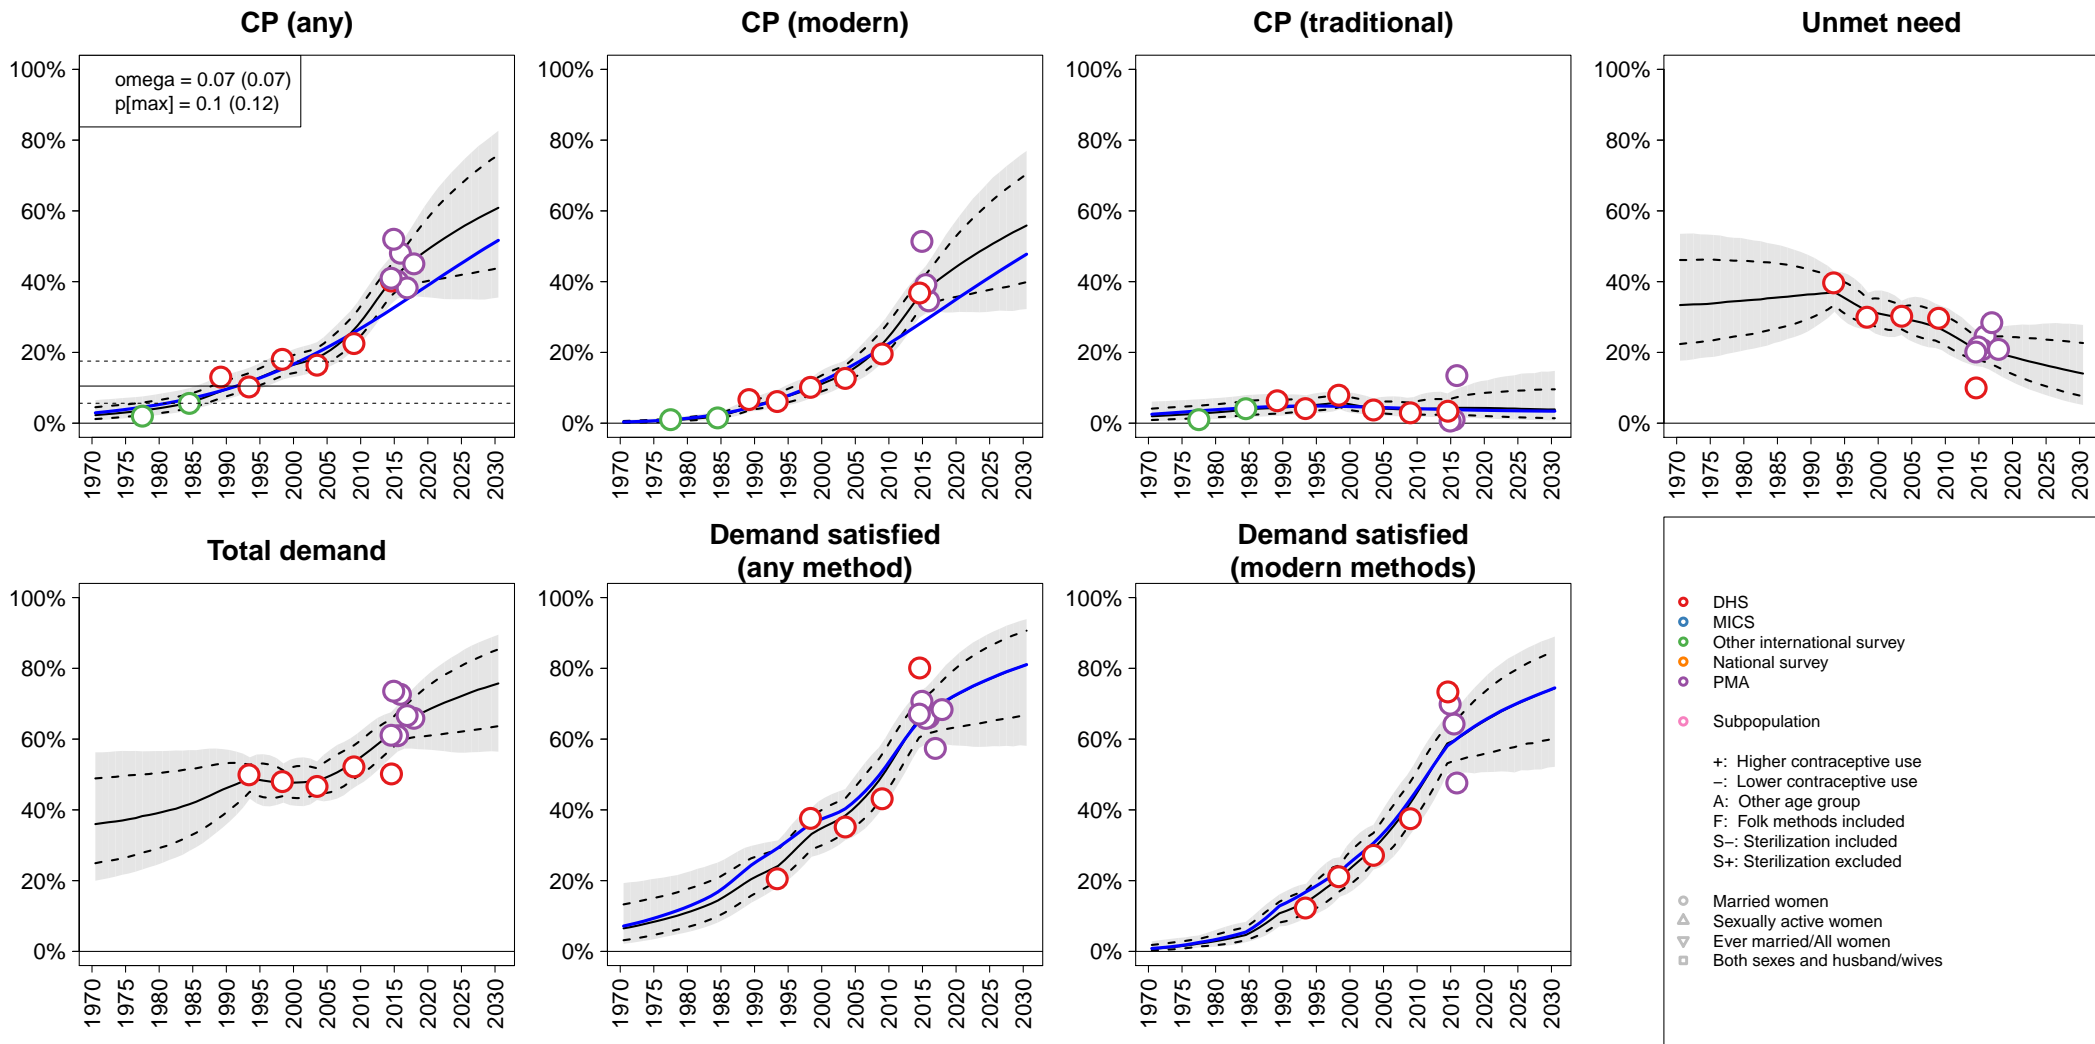

Kuwait (Western Asia) --- Married / In-Union

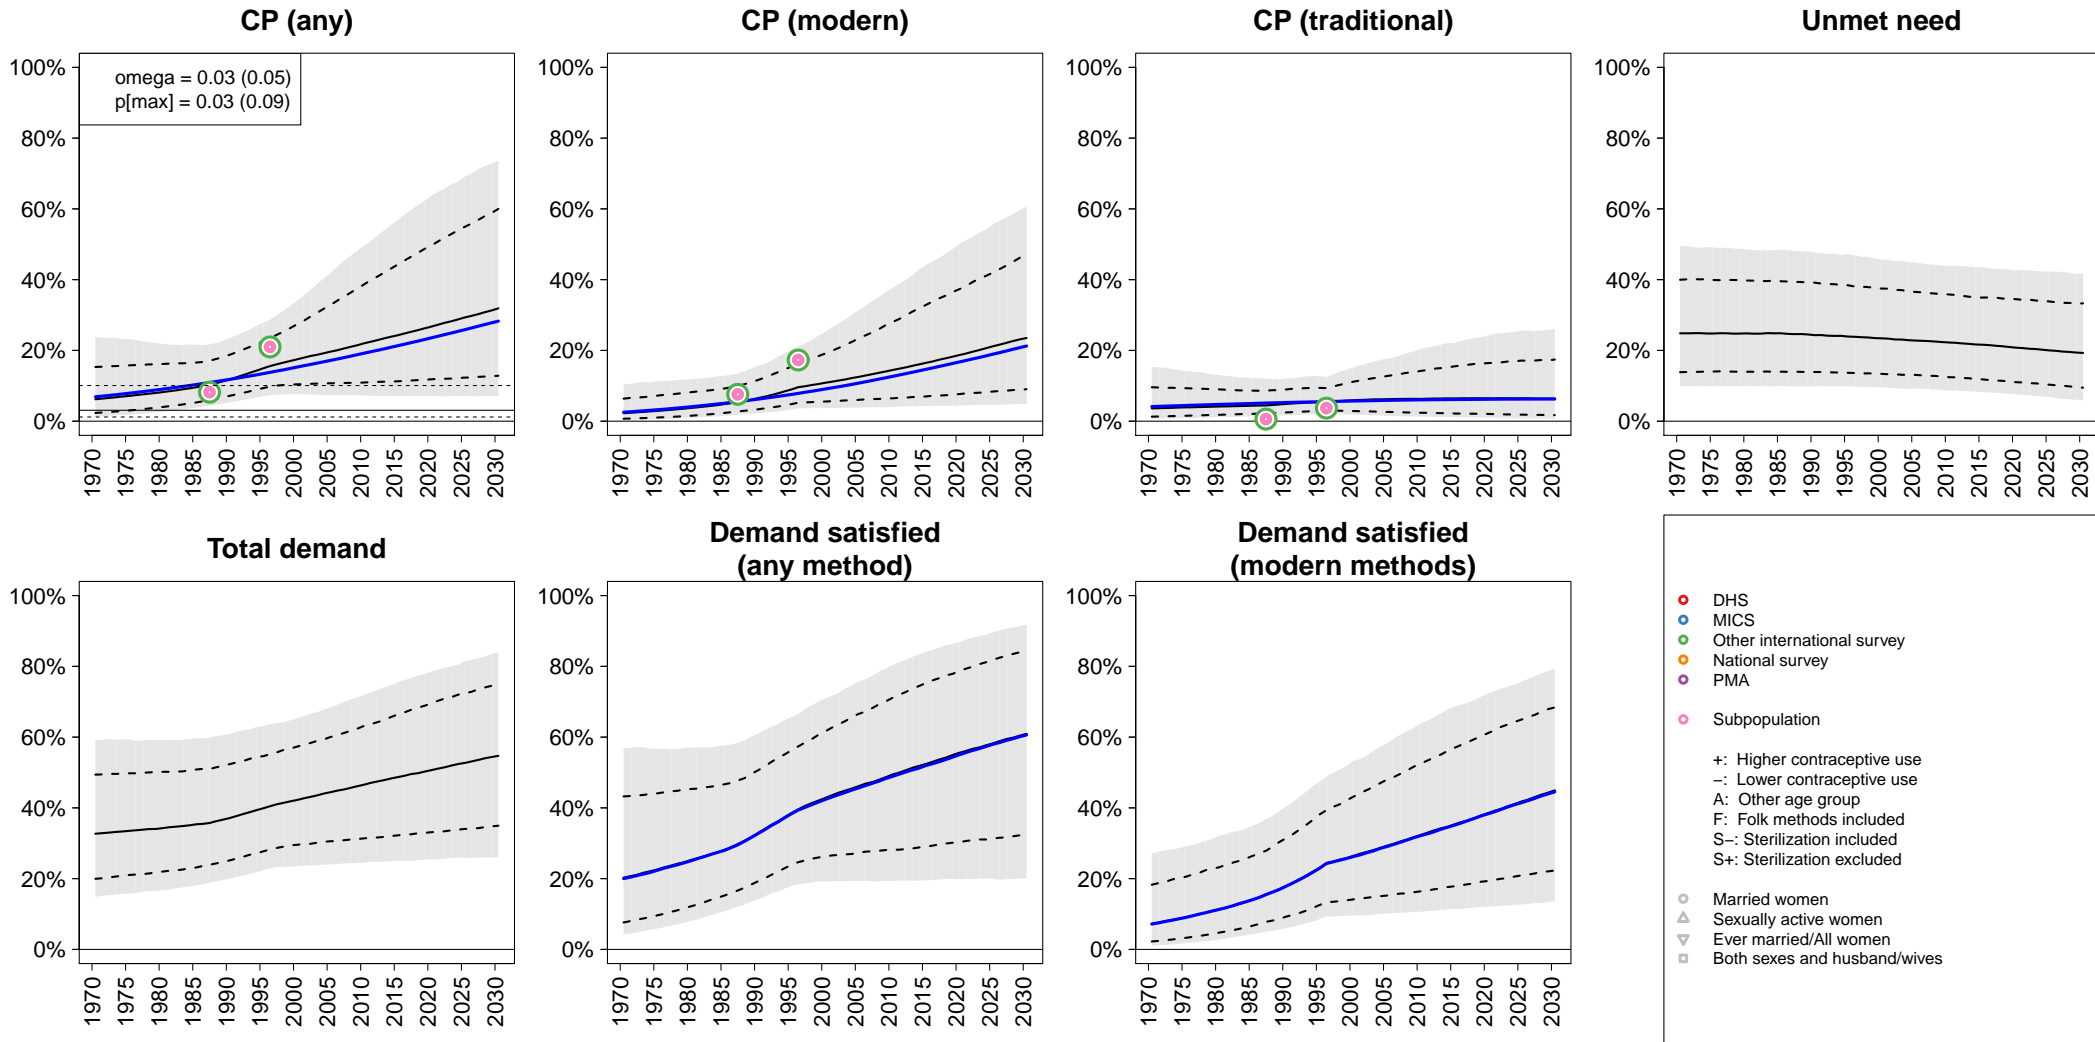

### Kyrgyzstan (Central Asia) --- Married / In-Union

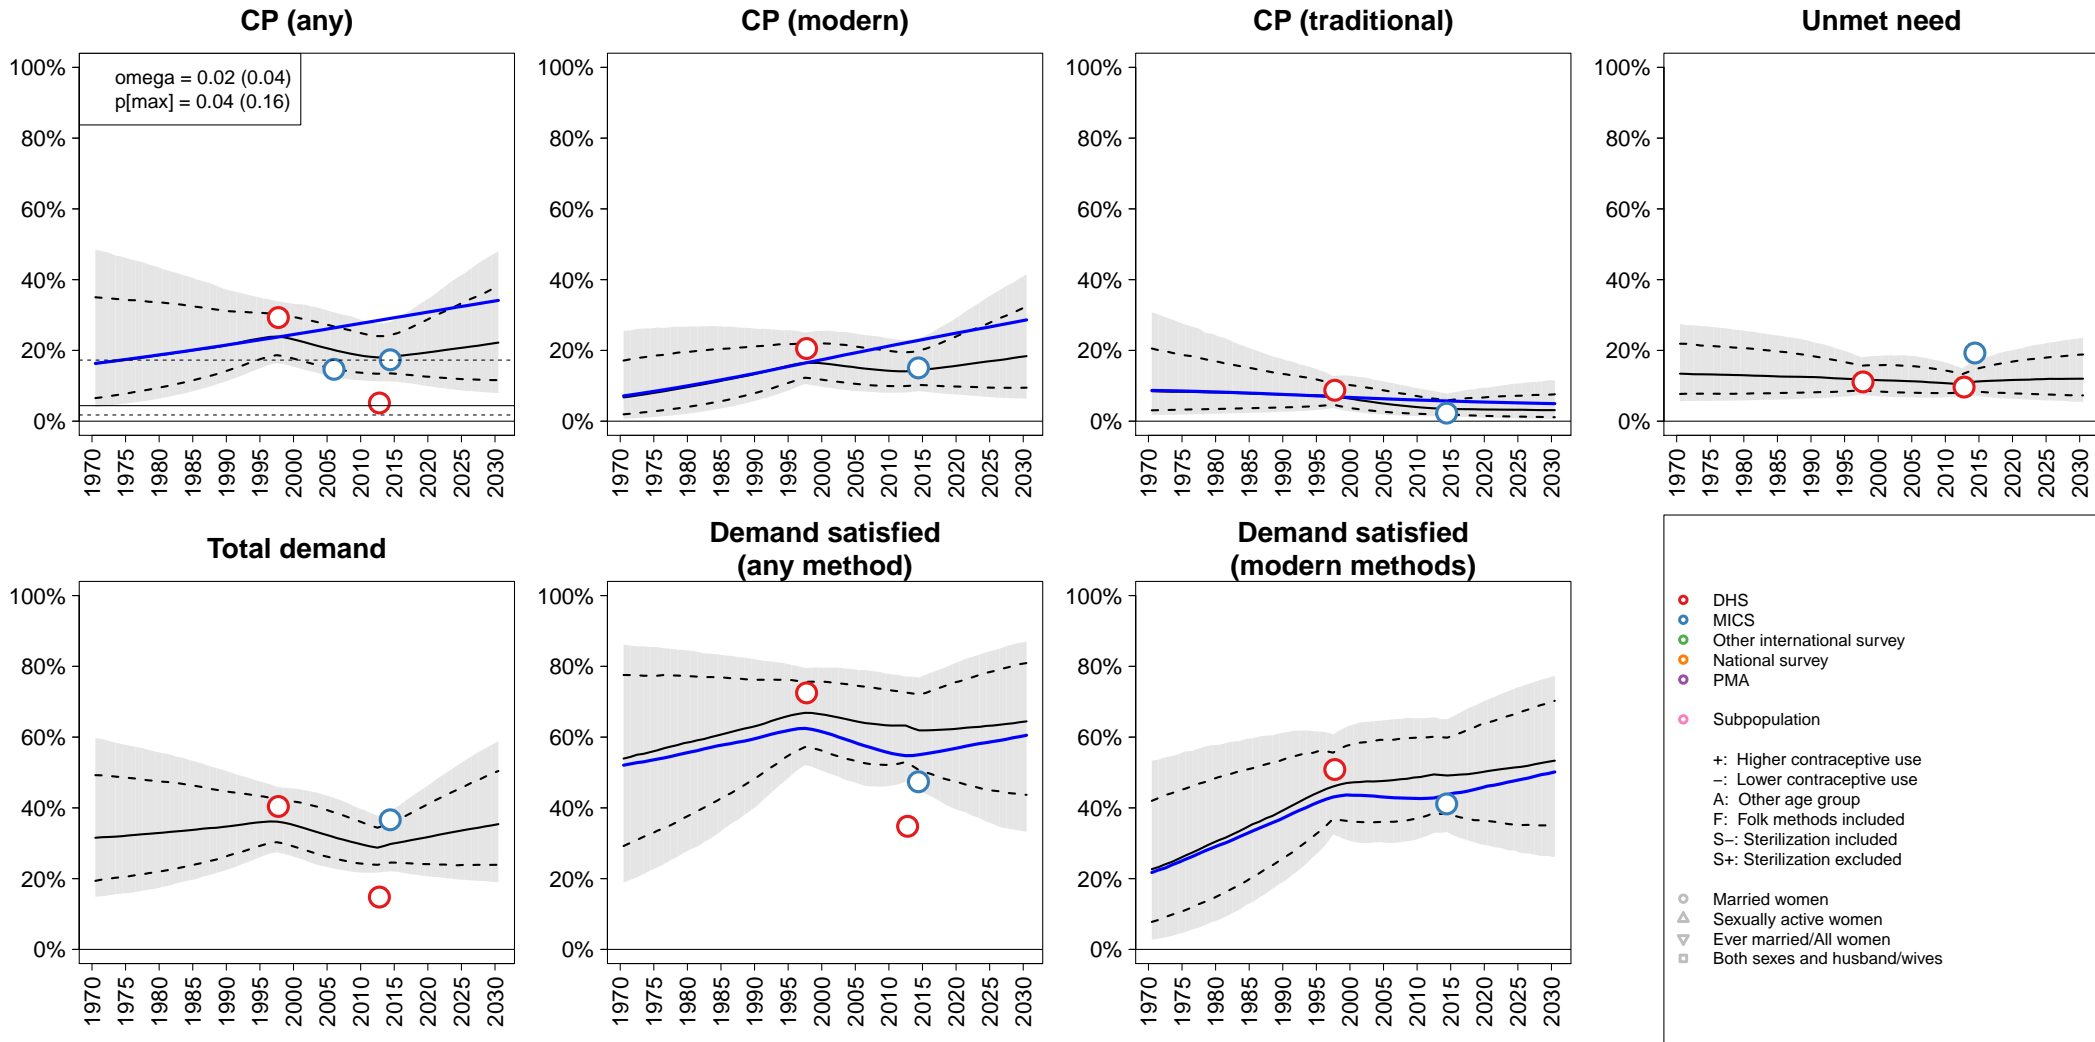

Lao People's Dem. Republic (South-eastern Asia) --- Married / In-Union

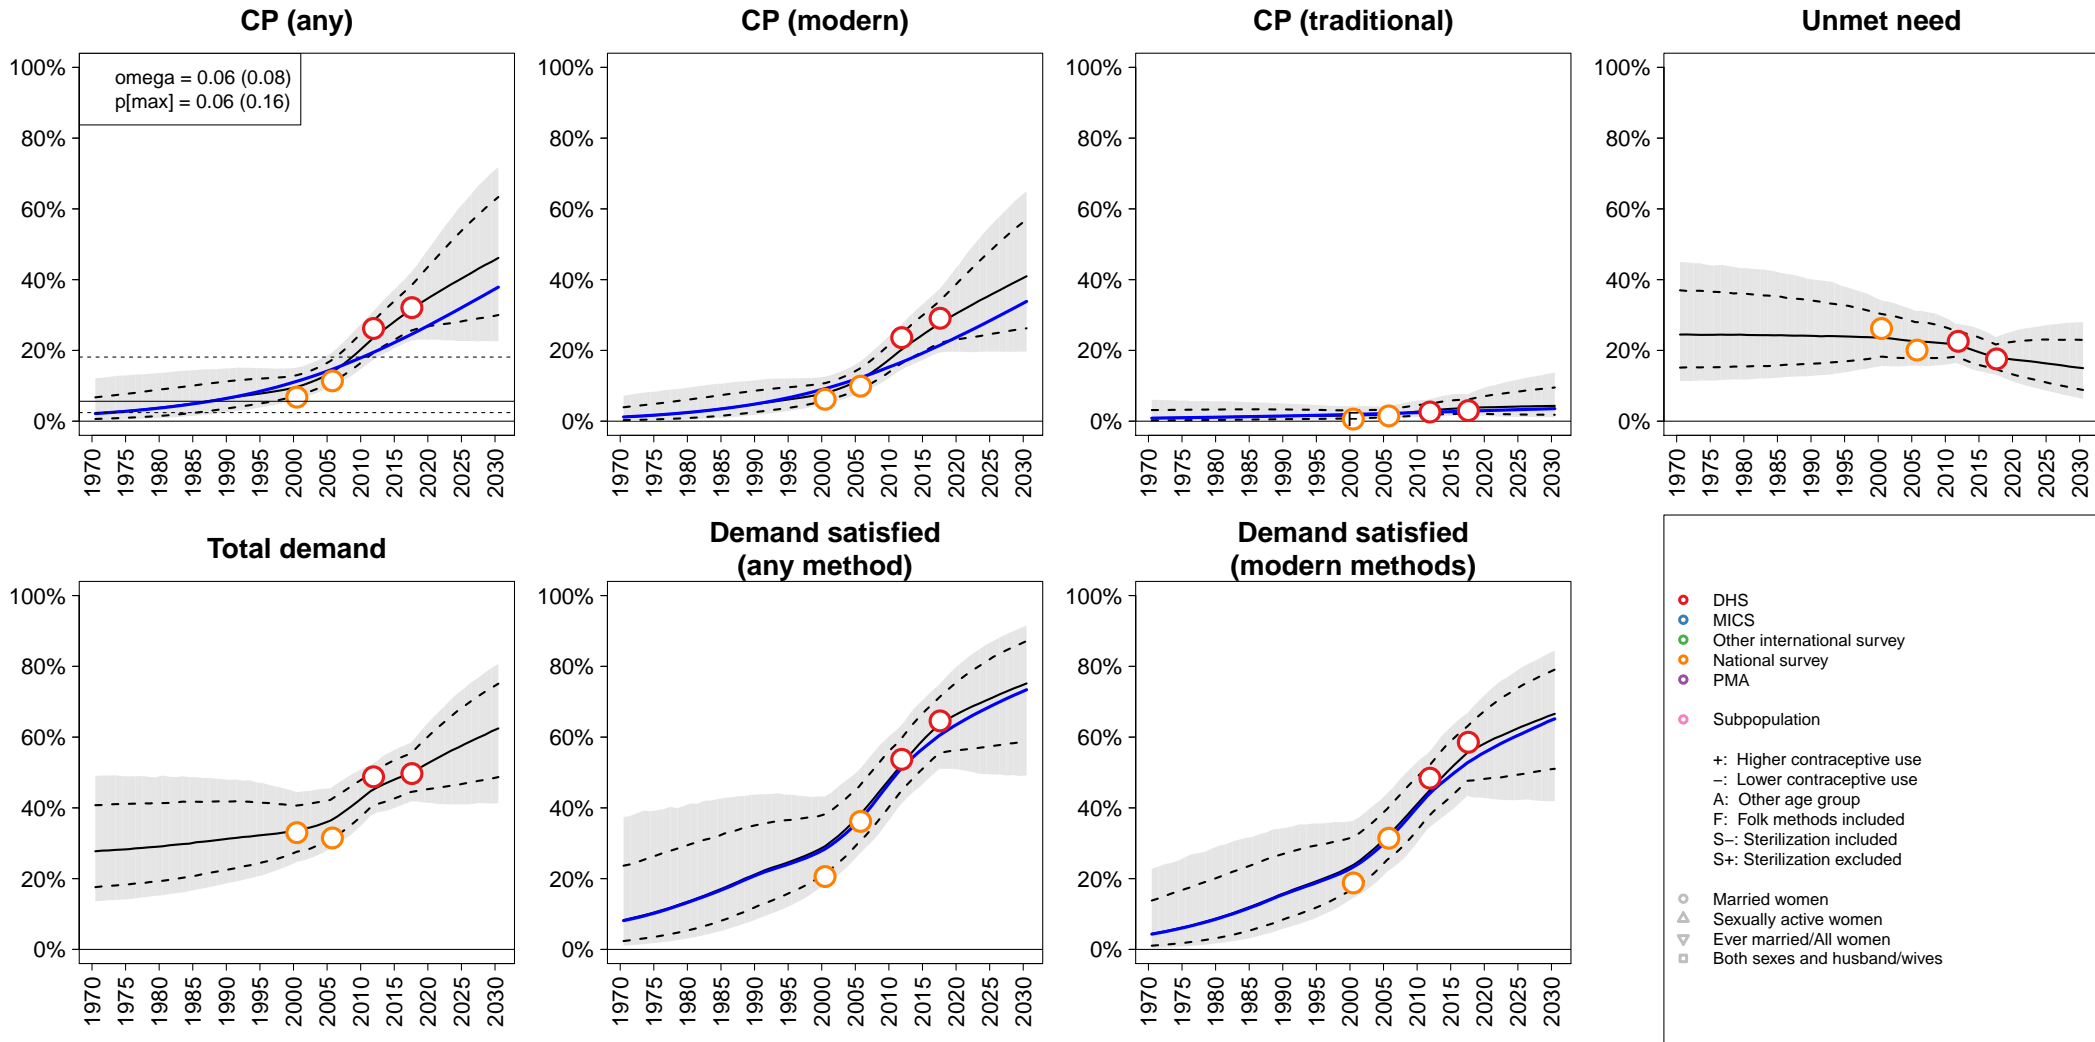



Lebanon (Western Asia) --- Married / In-Union

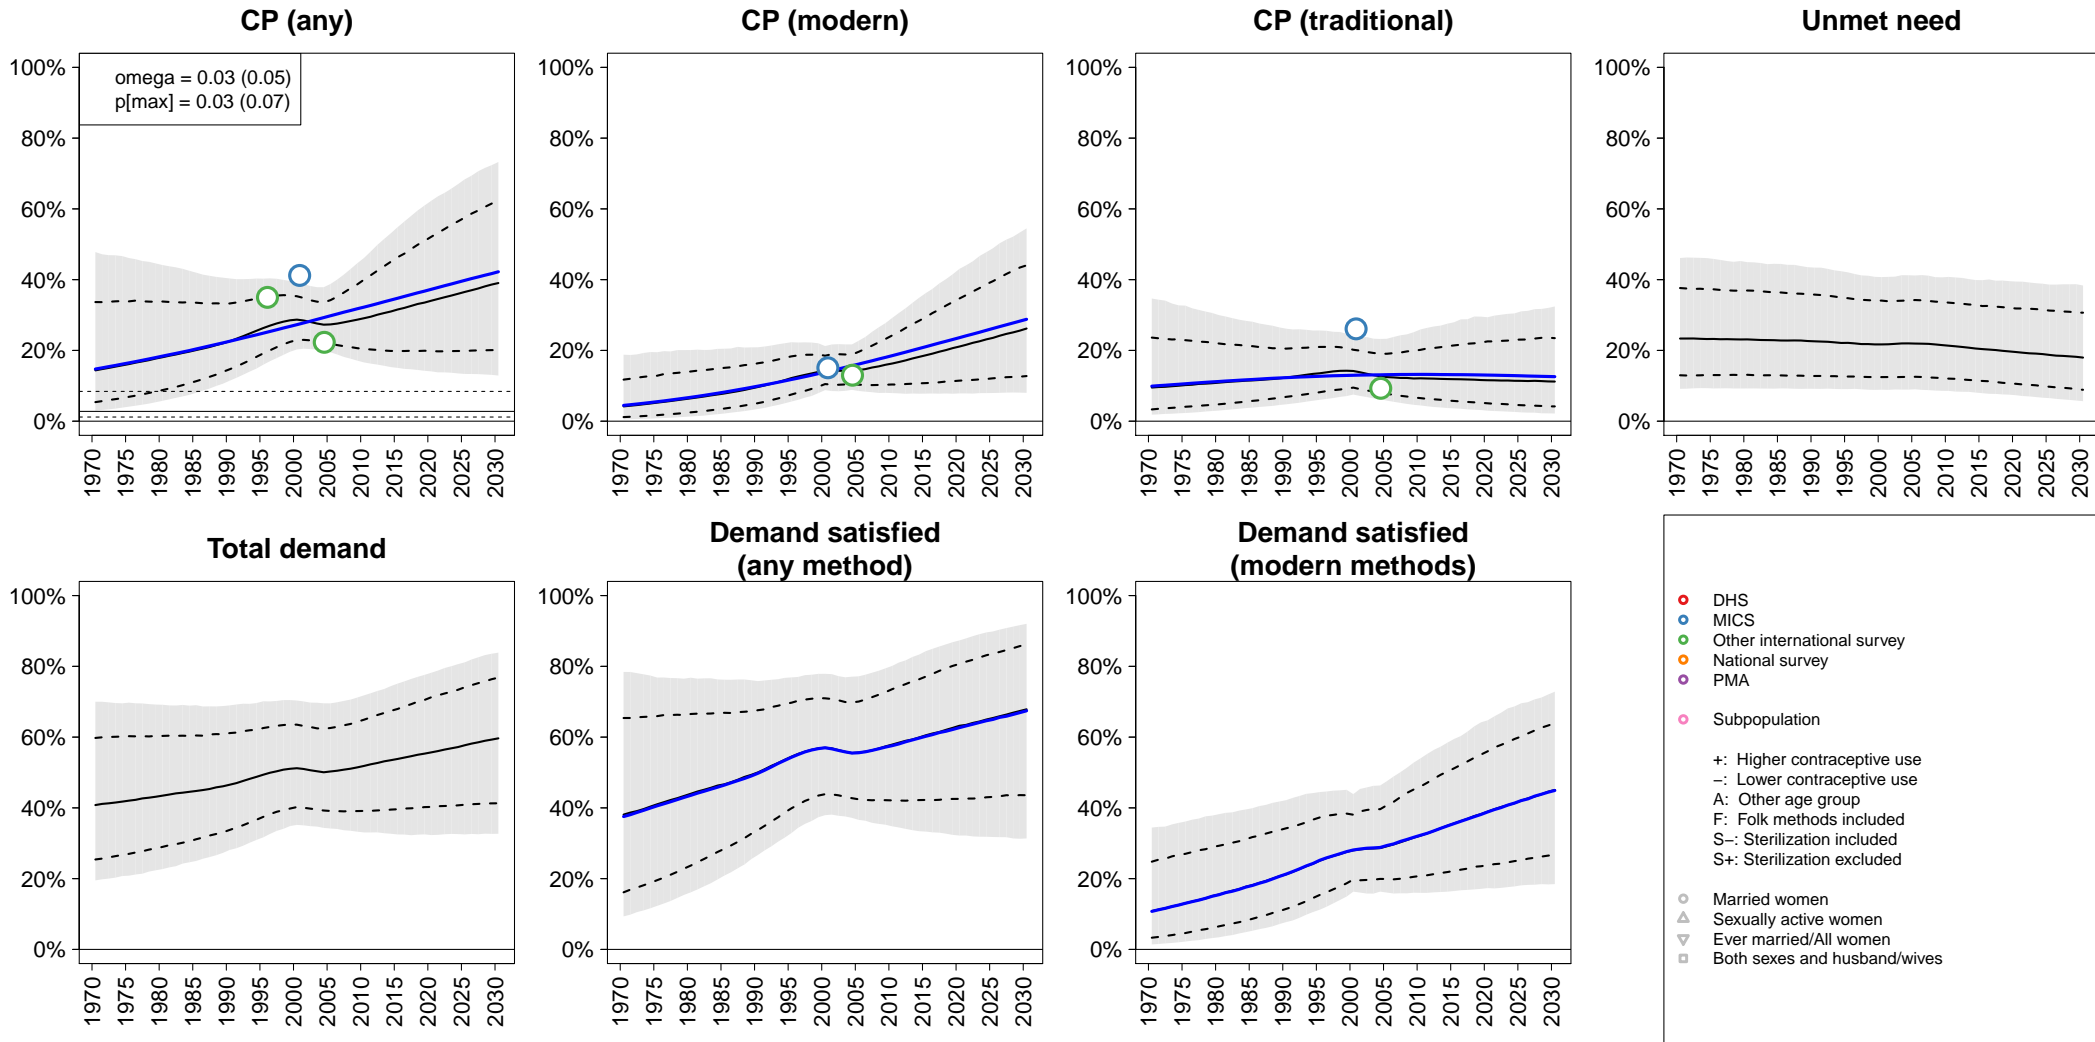

### Lesotho (Southern Africa) --- Married / In-Union

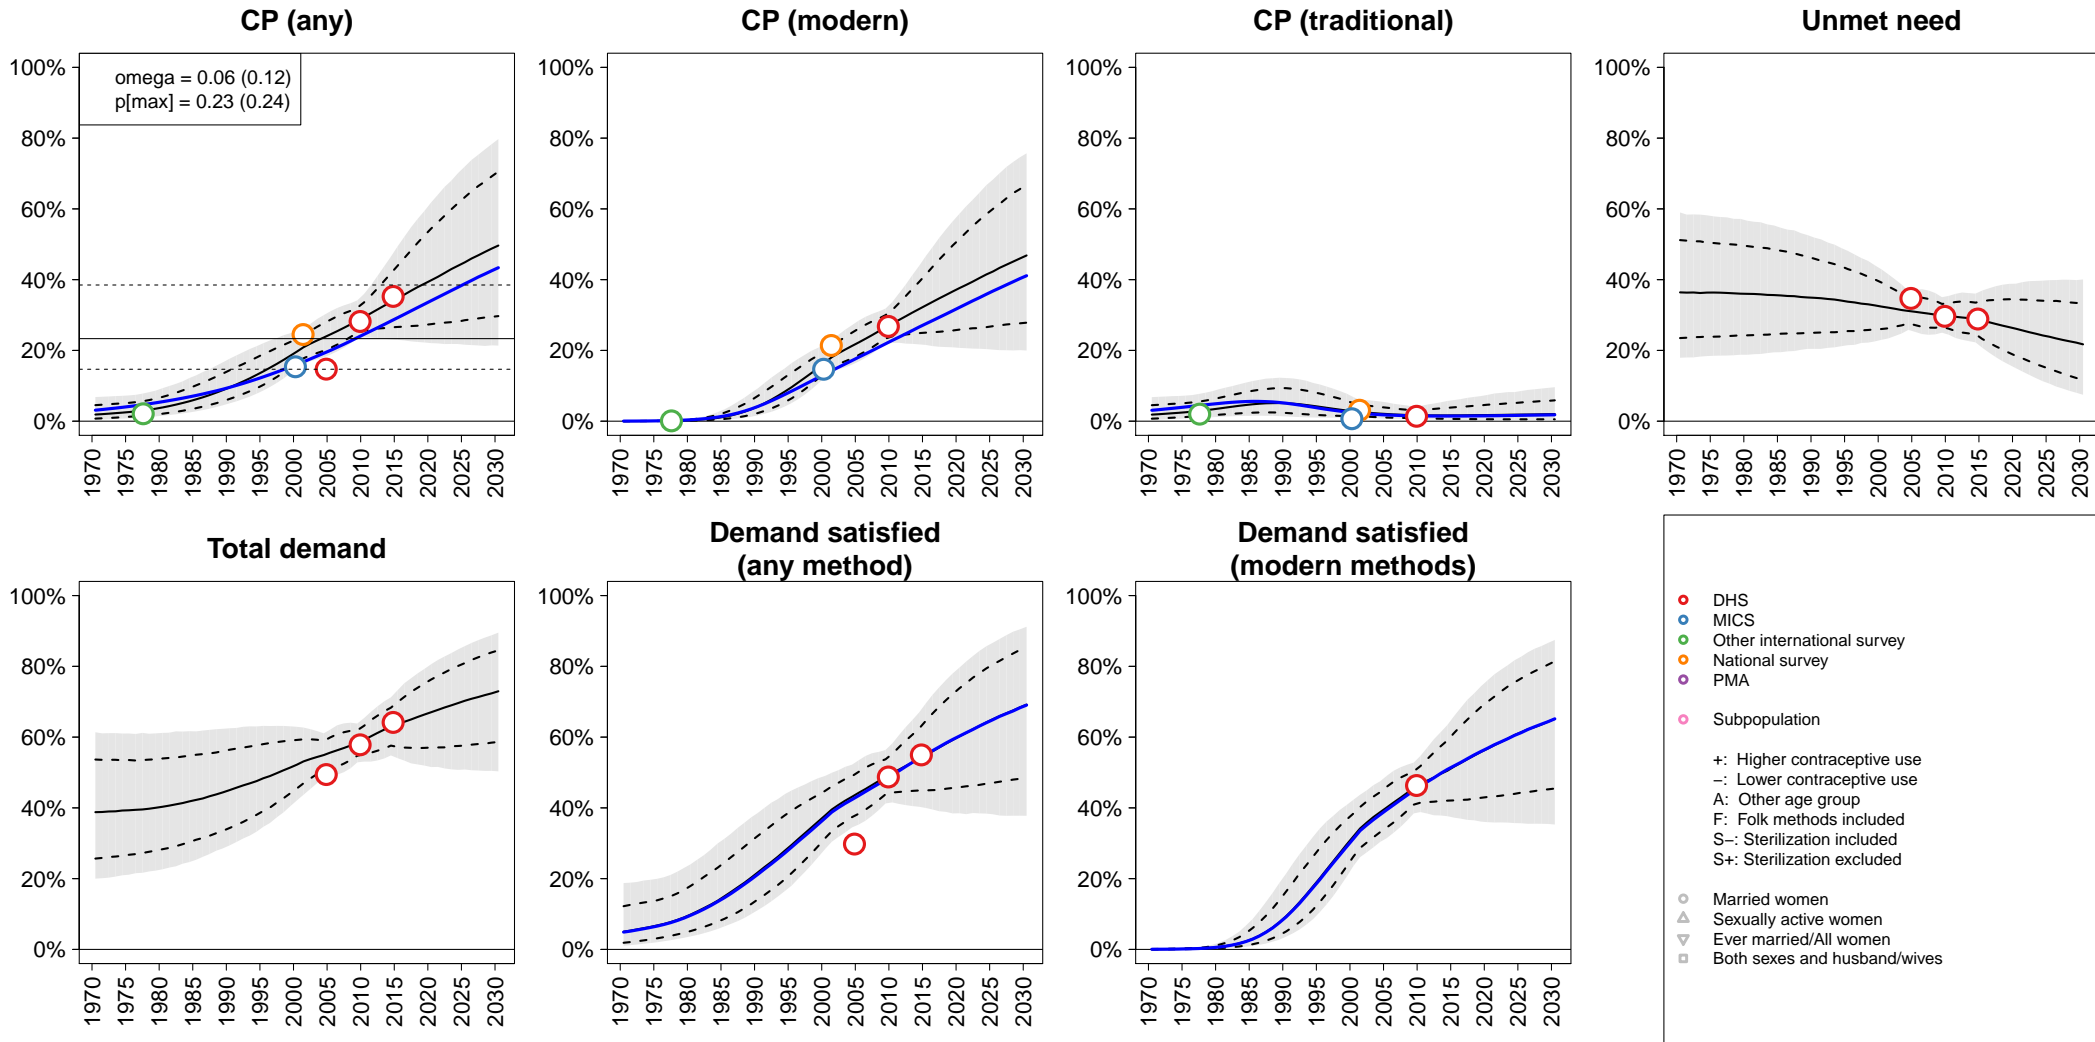

Liberia (Western Africa) --- Married / In-Union

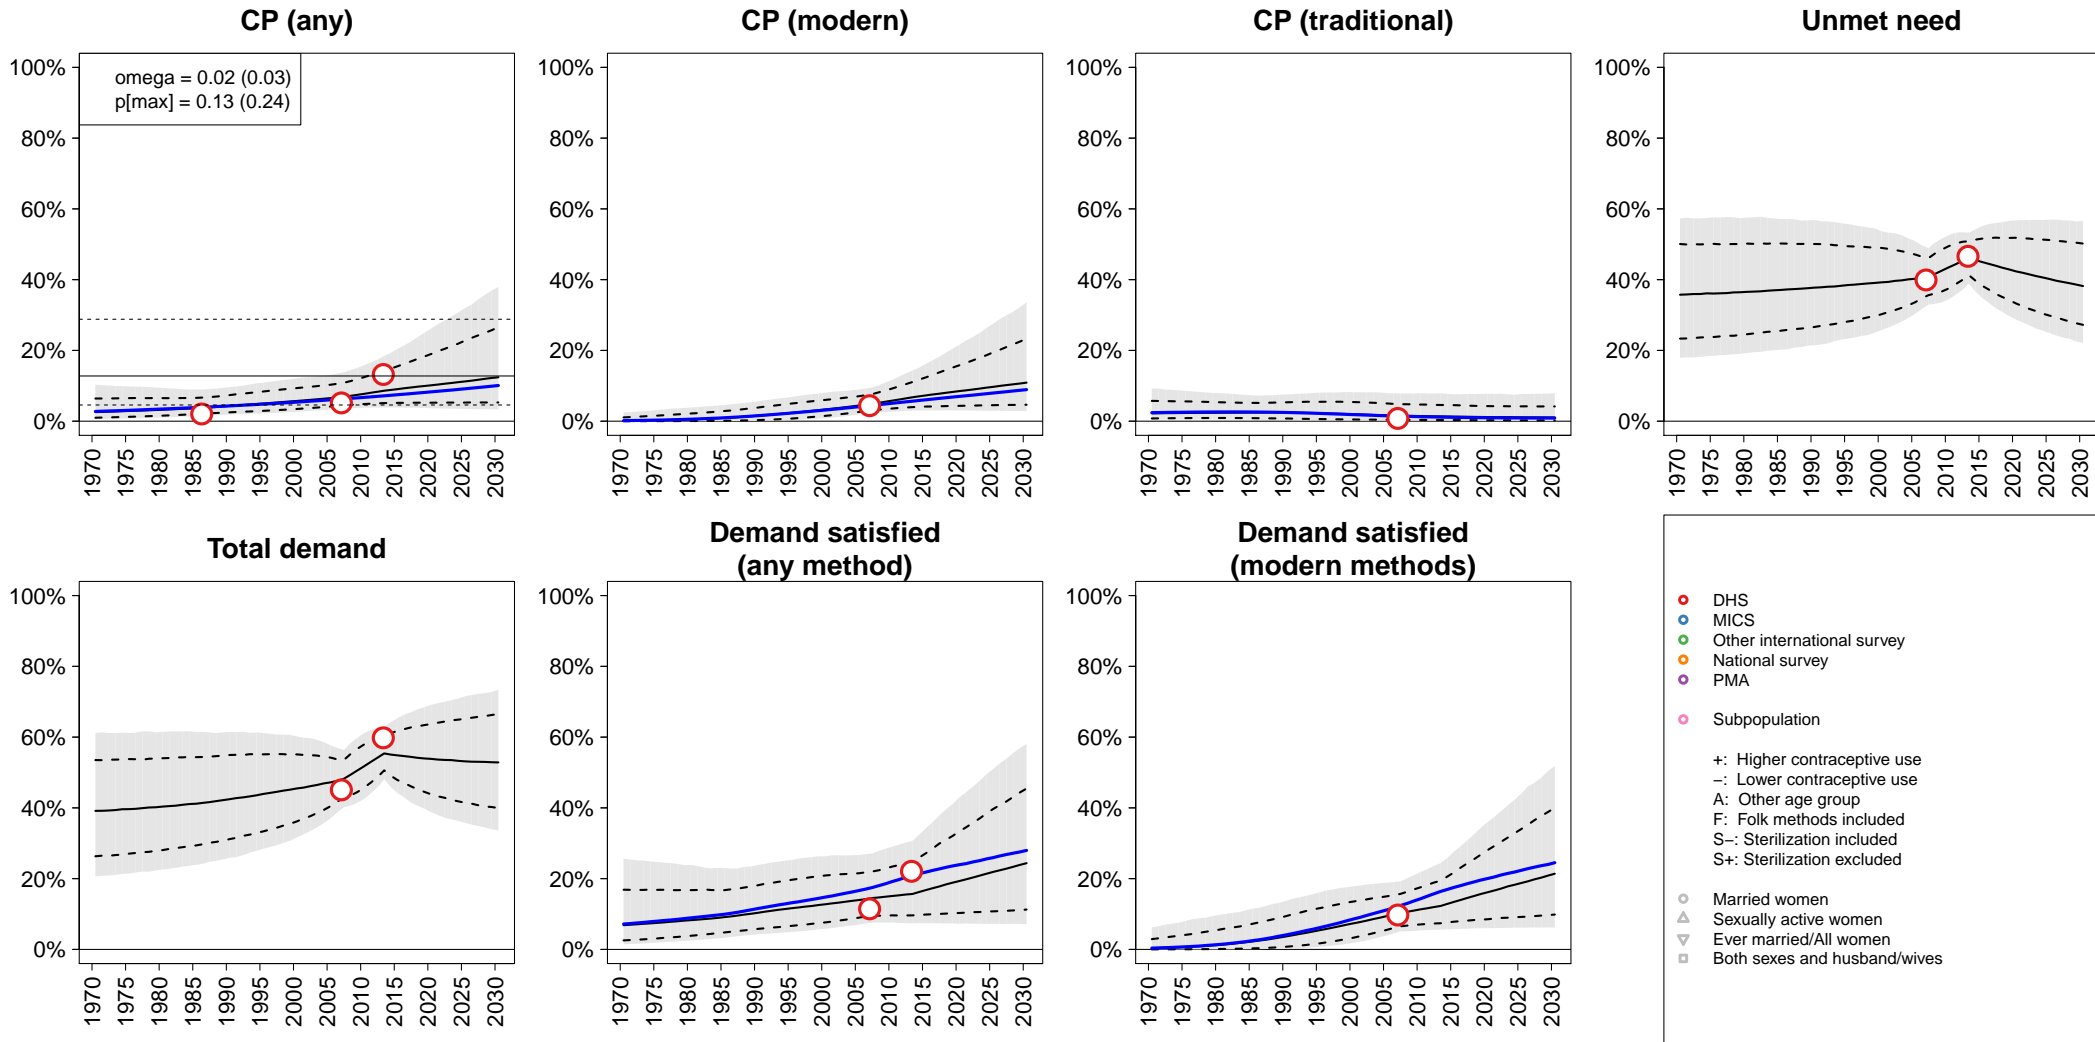

Madagascar (Eastern Africa) --- Married / In-Union

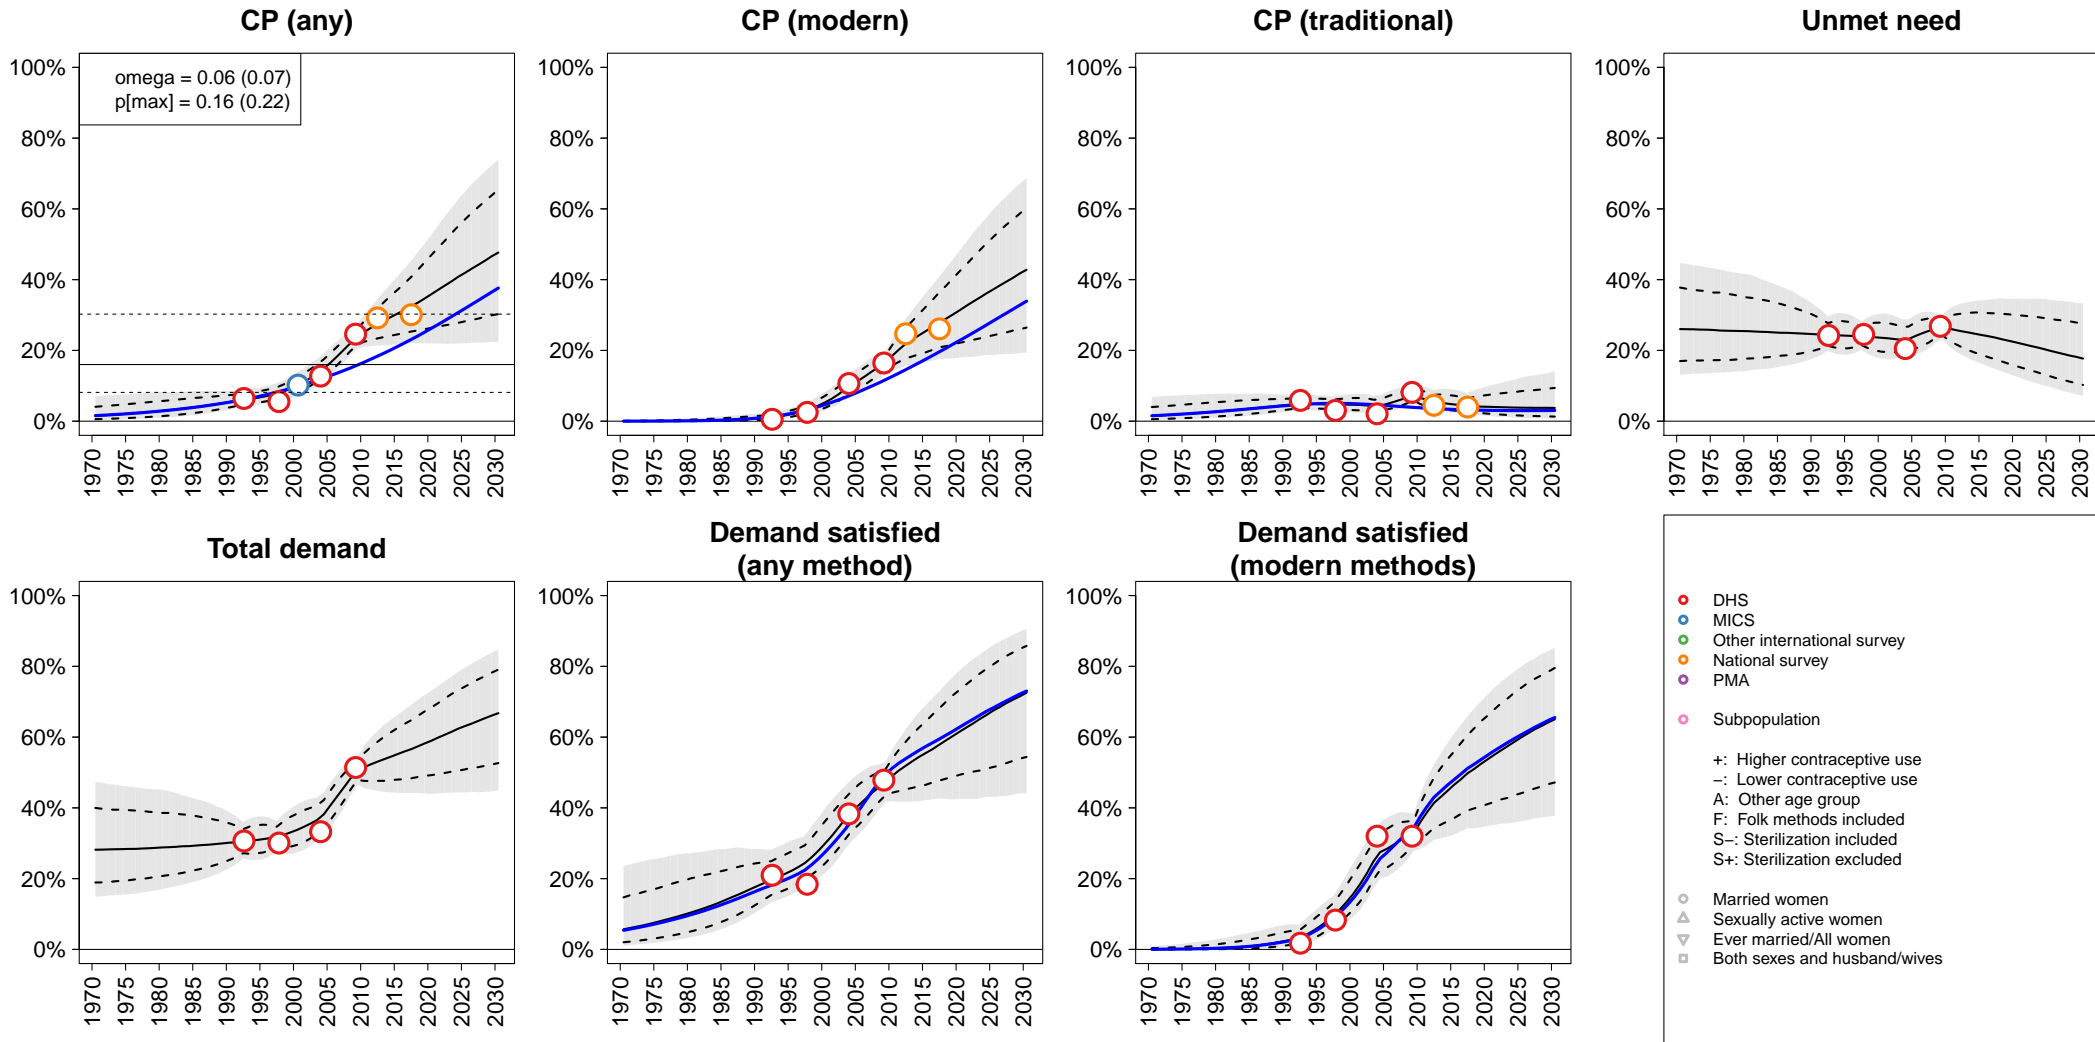

Malawi (Eastern Africa) --- Married / In-Union

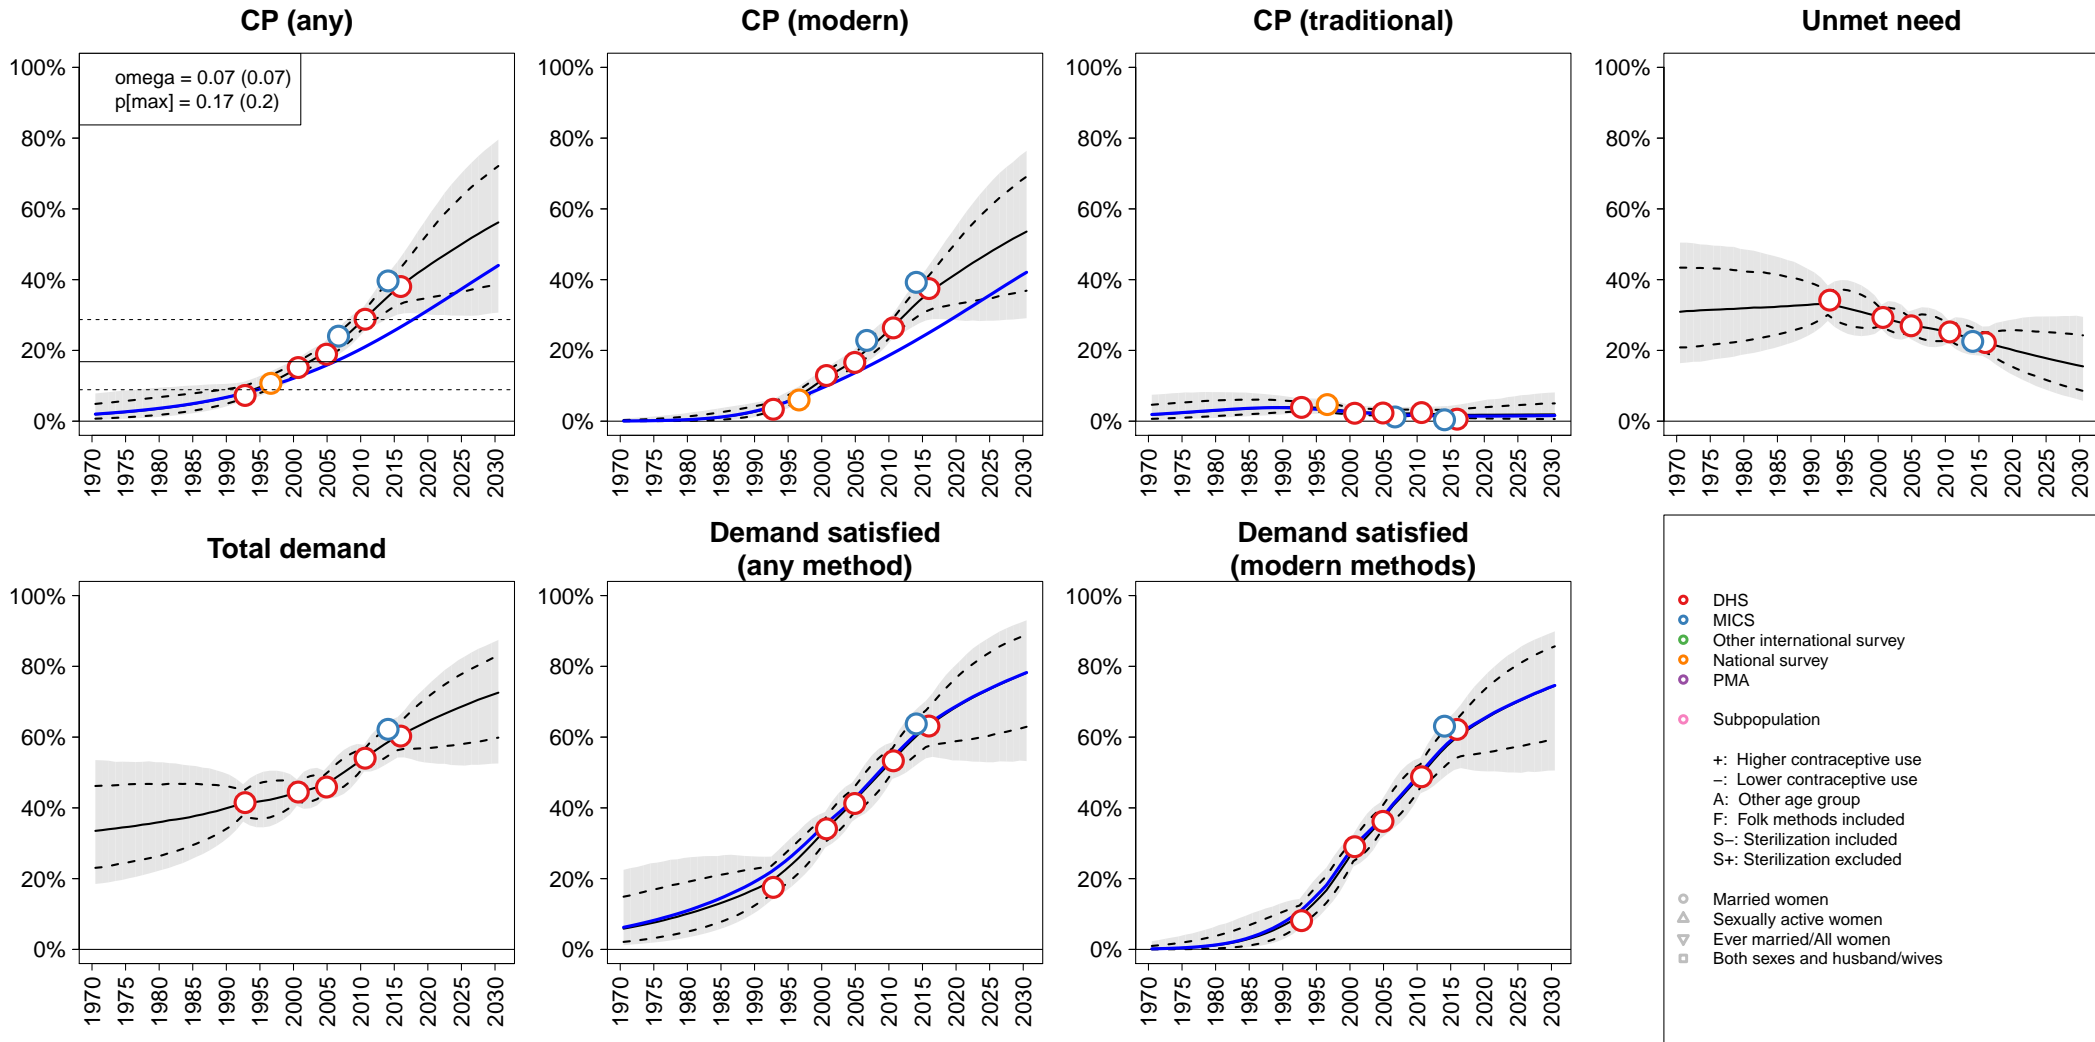

Malaysia (South-eastern Asia) --- Married / In-Union

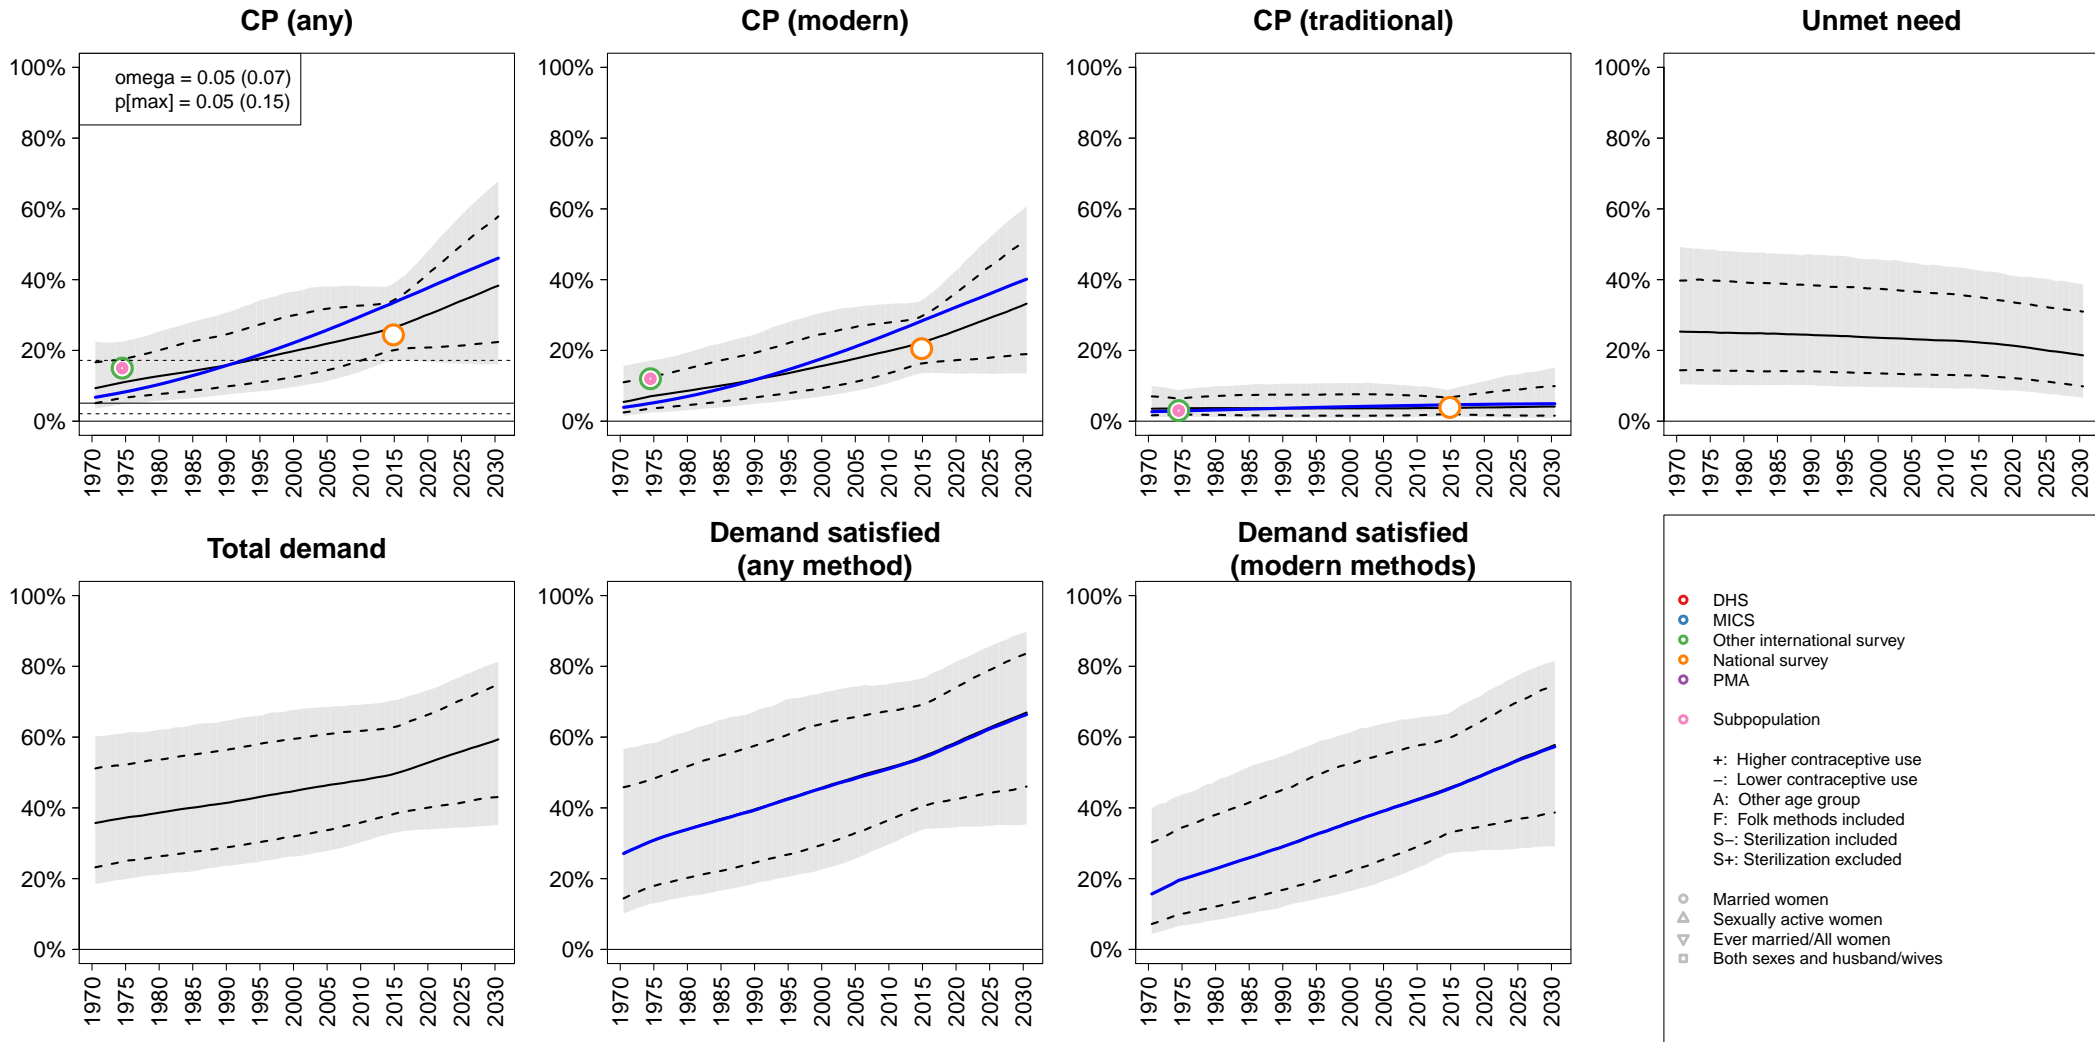

Mali (Western Africa) --- Married / In-Union

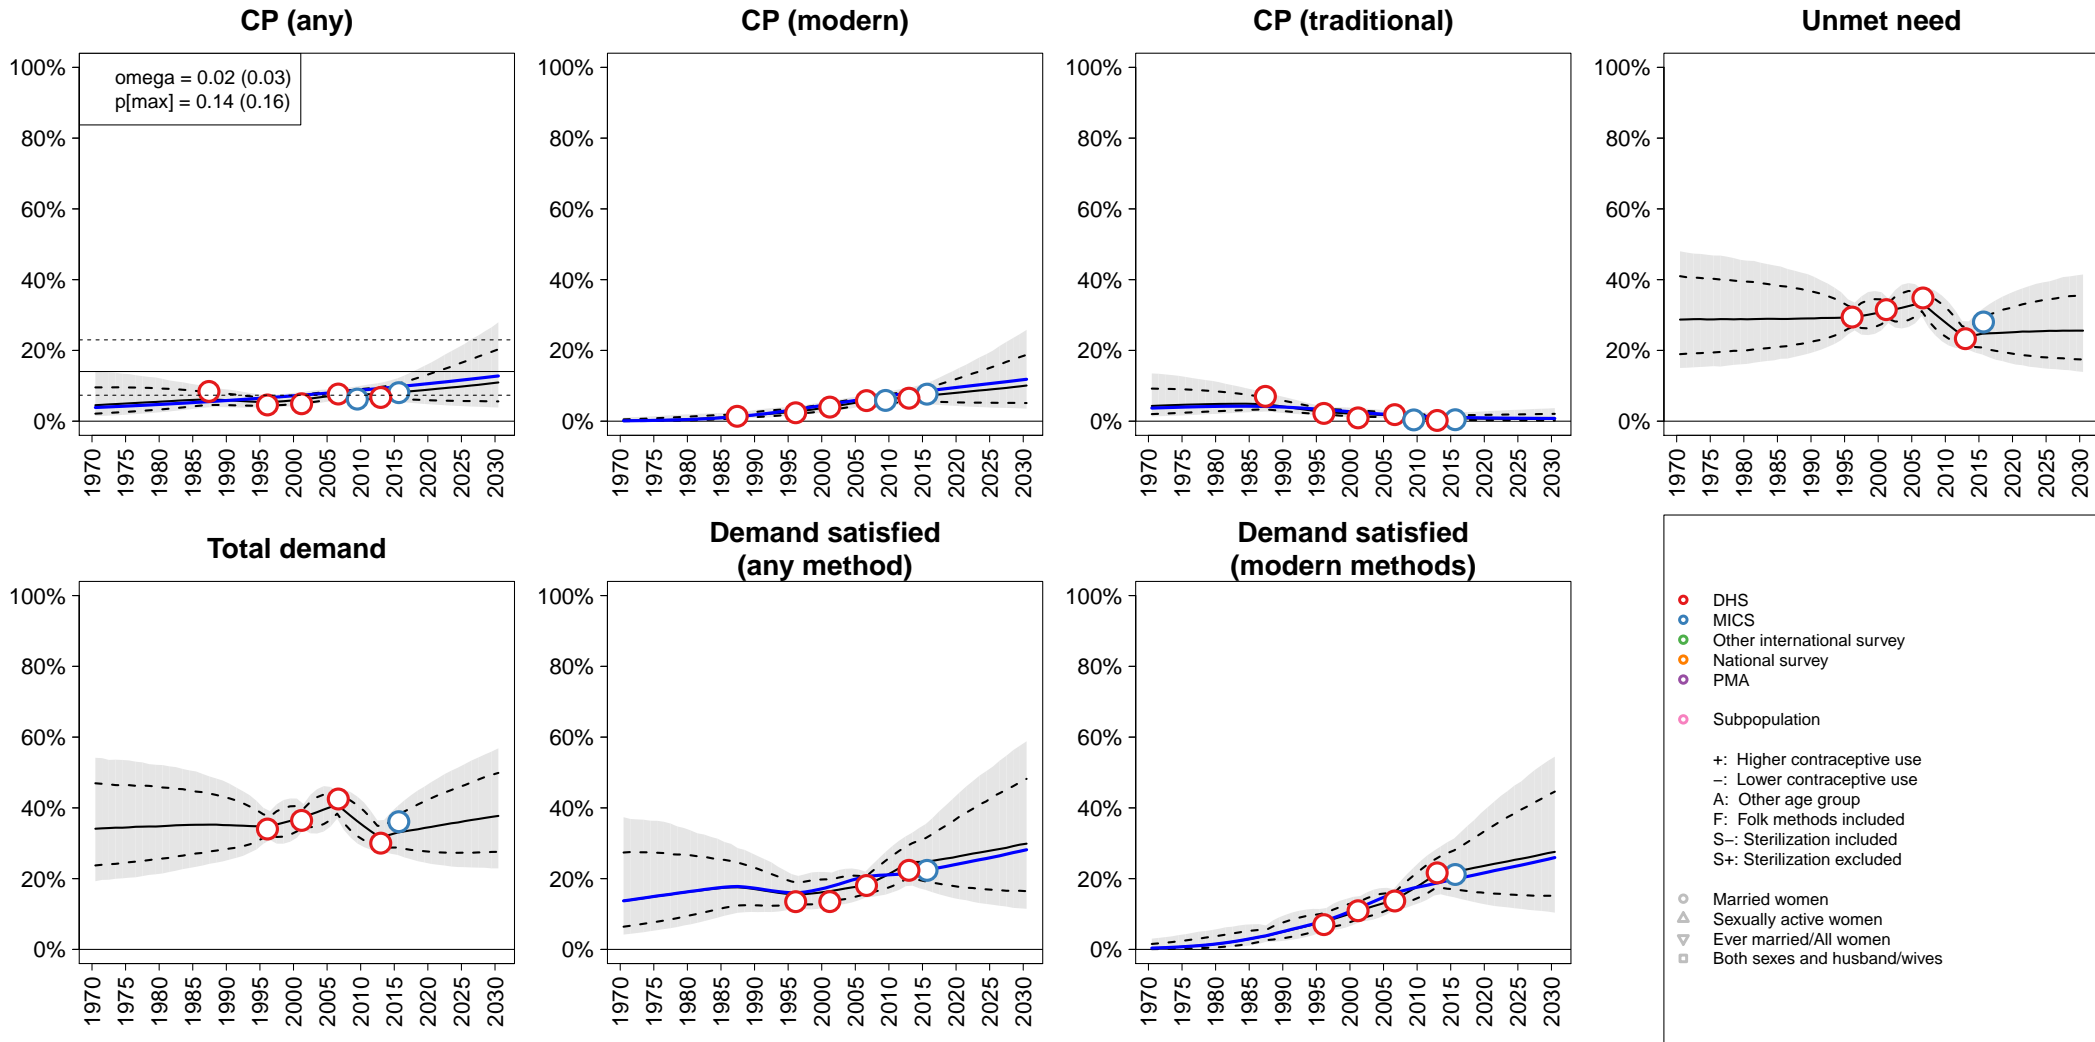

### Mauritania (Western Africa) --- Married / In-Union

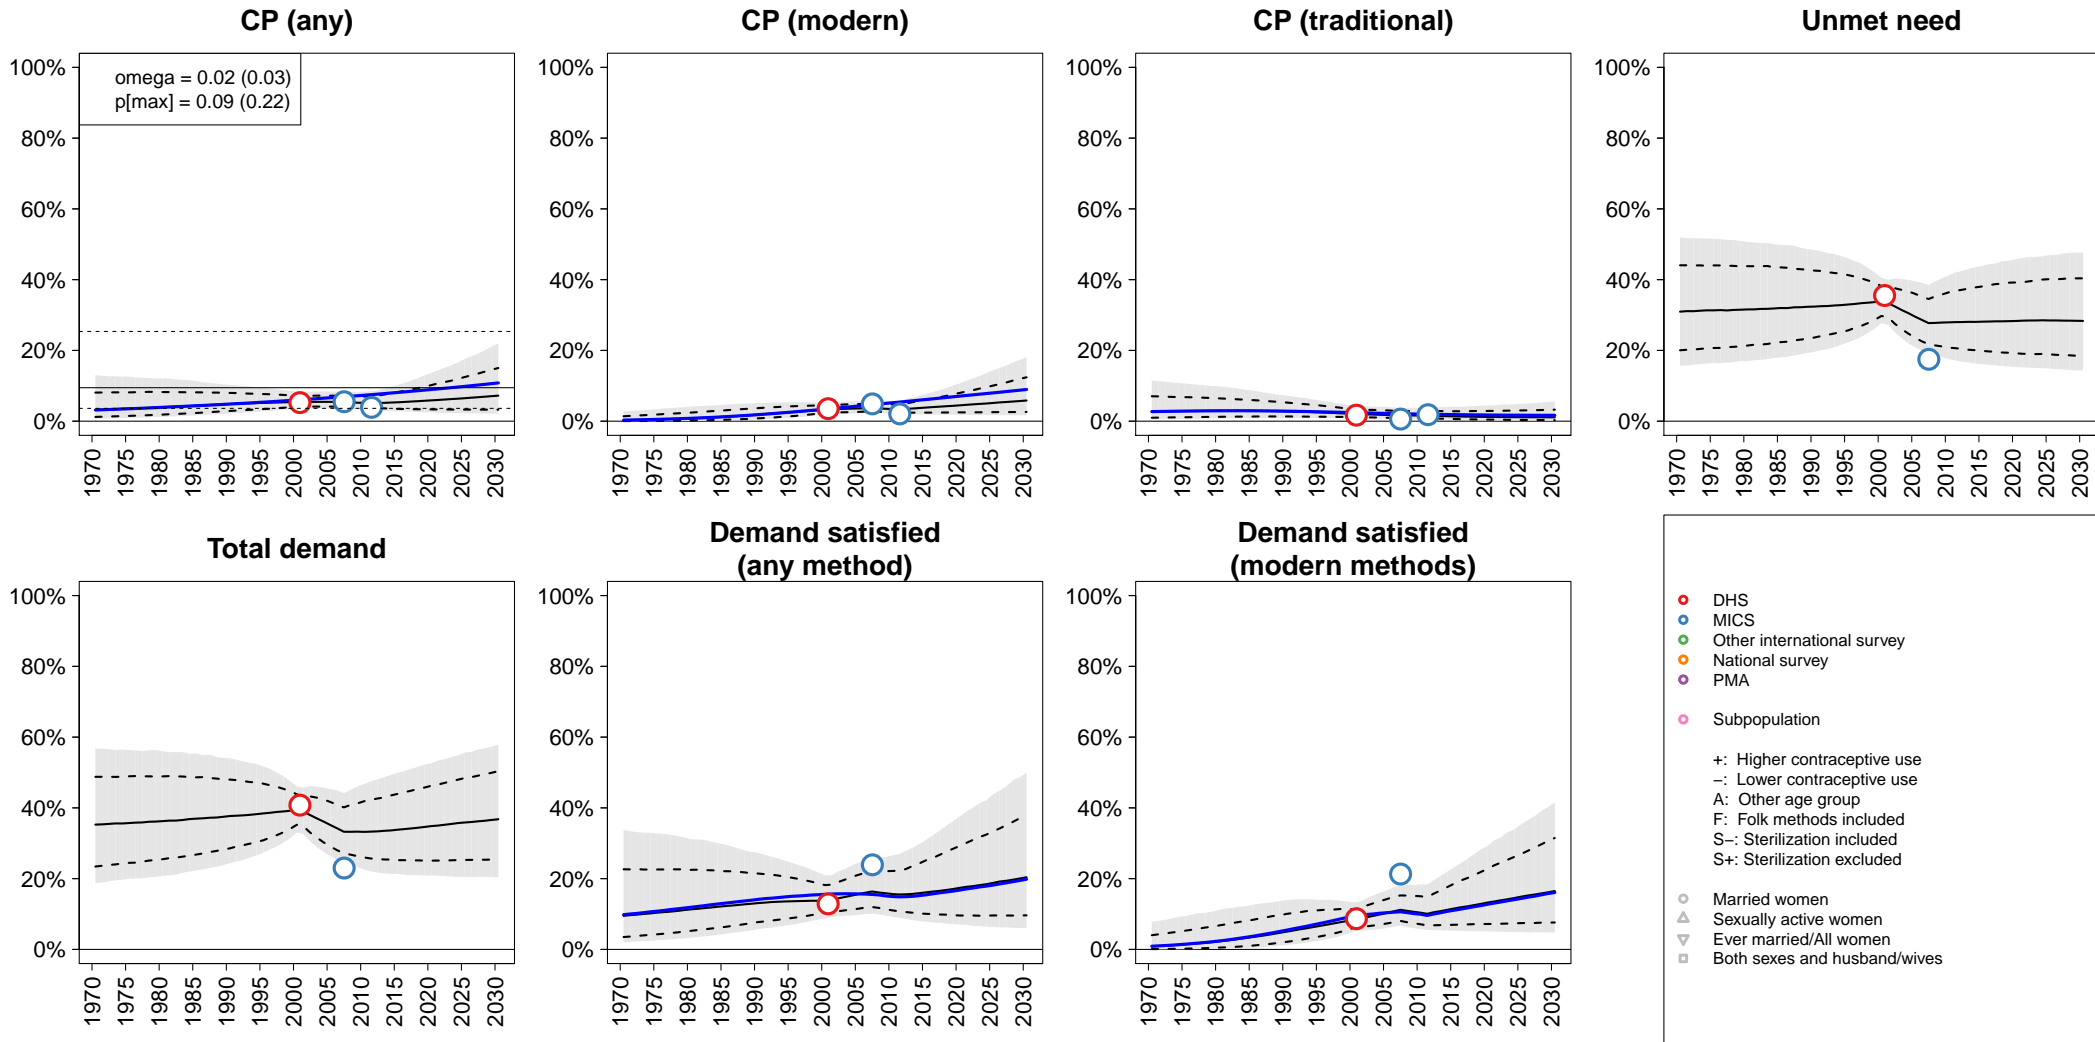



Mauritius (Eastern Africa) --- Married / In-Union

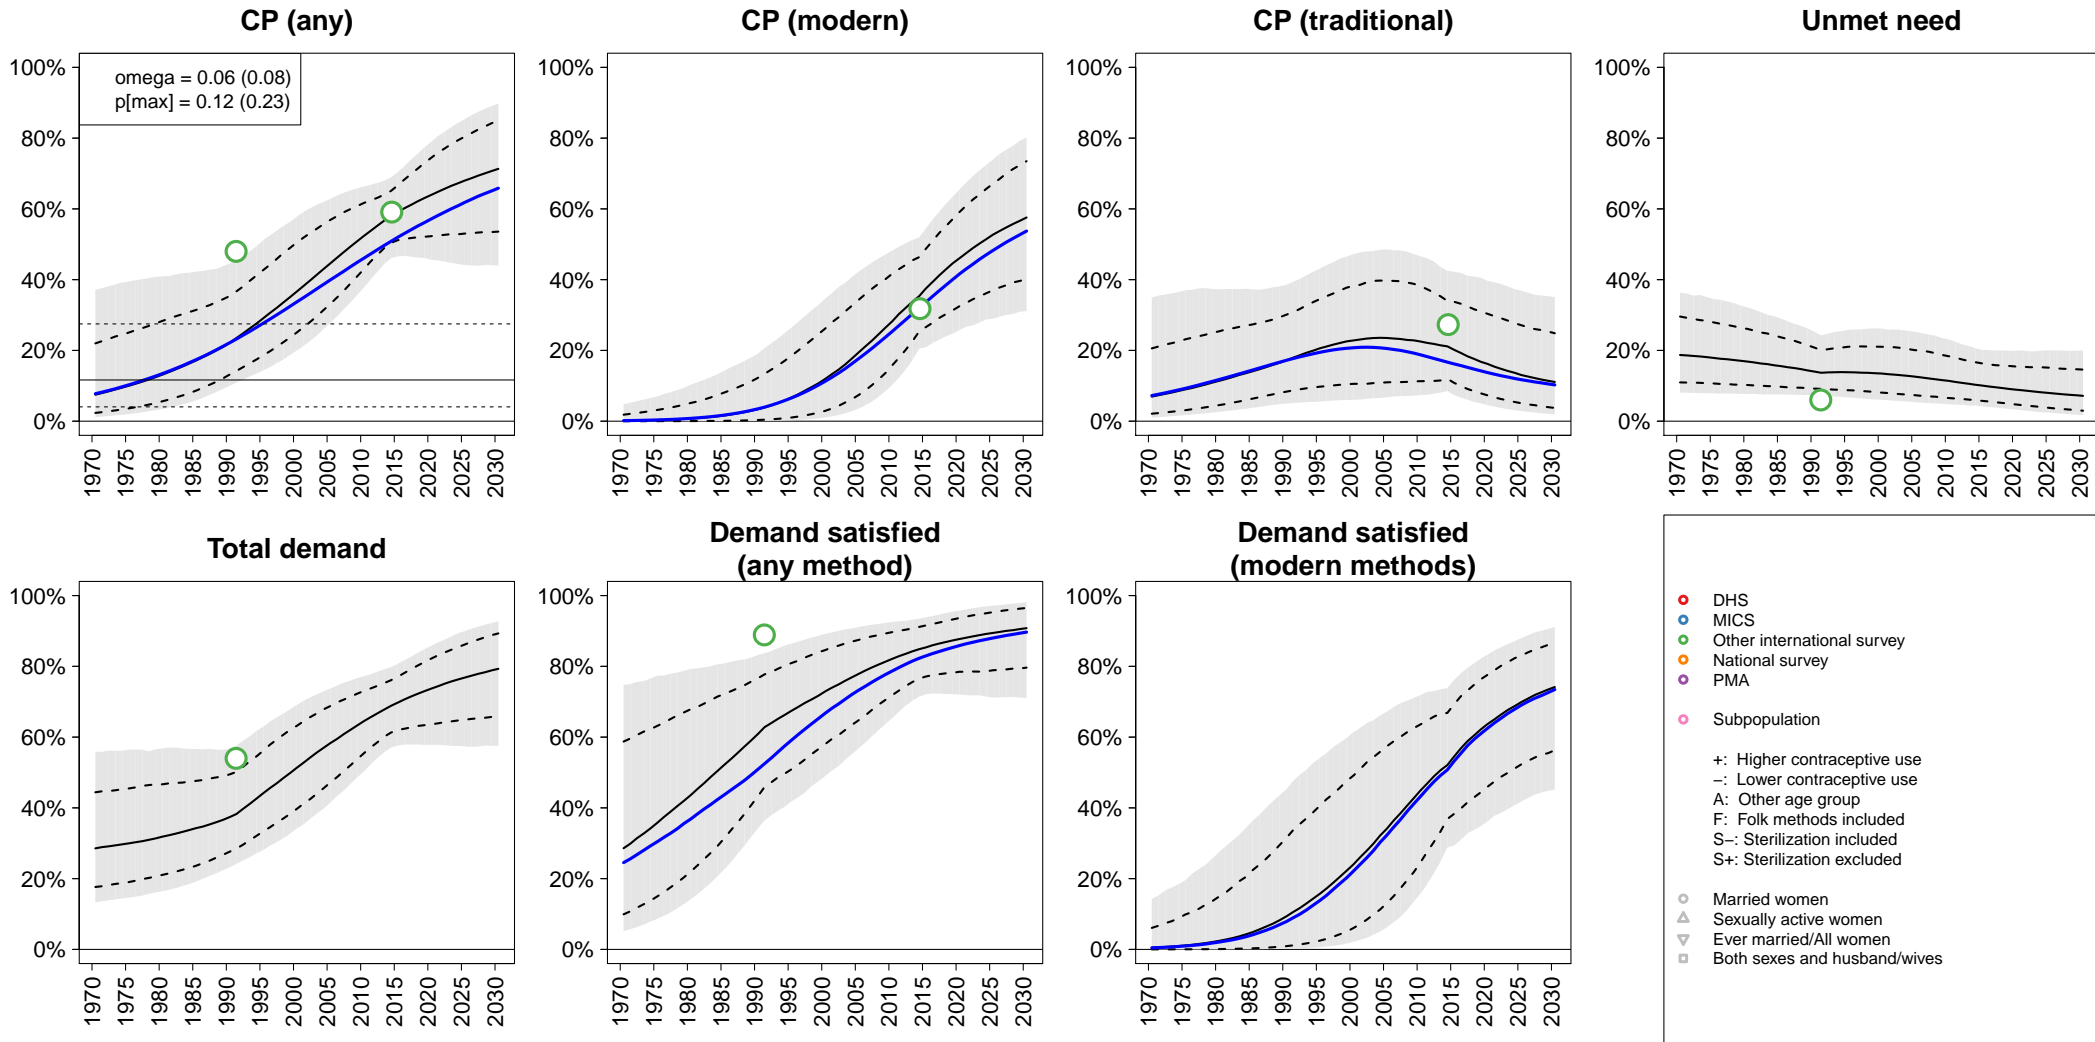

Mexico (Central America) --- Married / In-Union

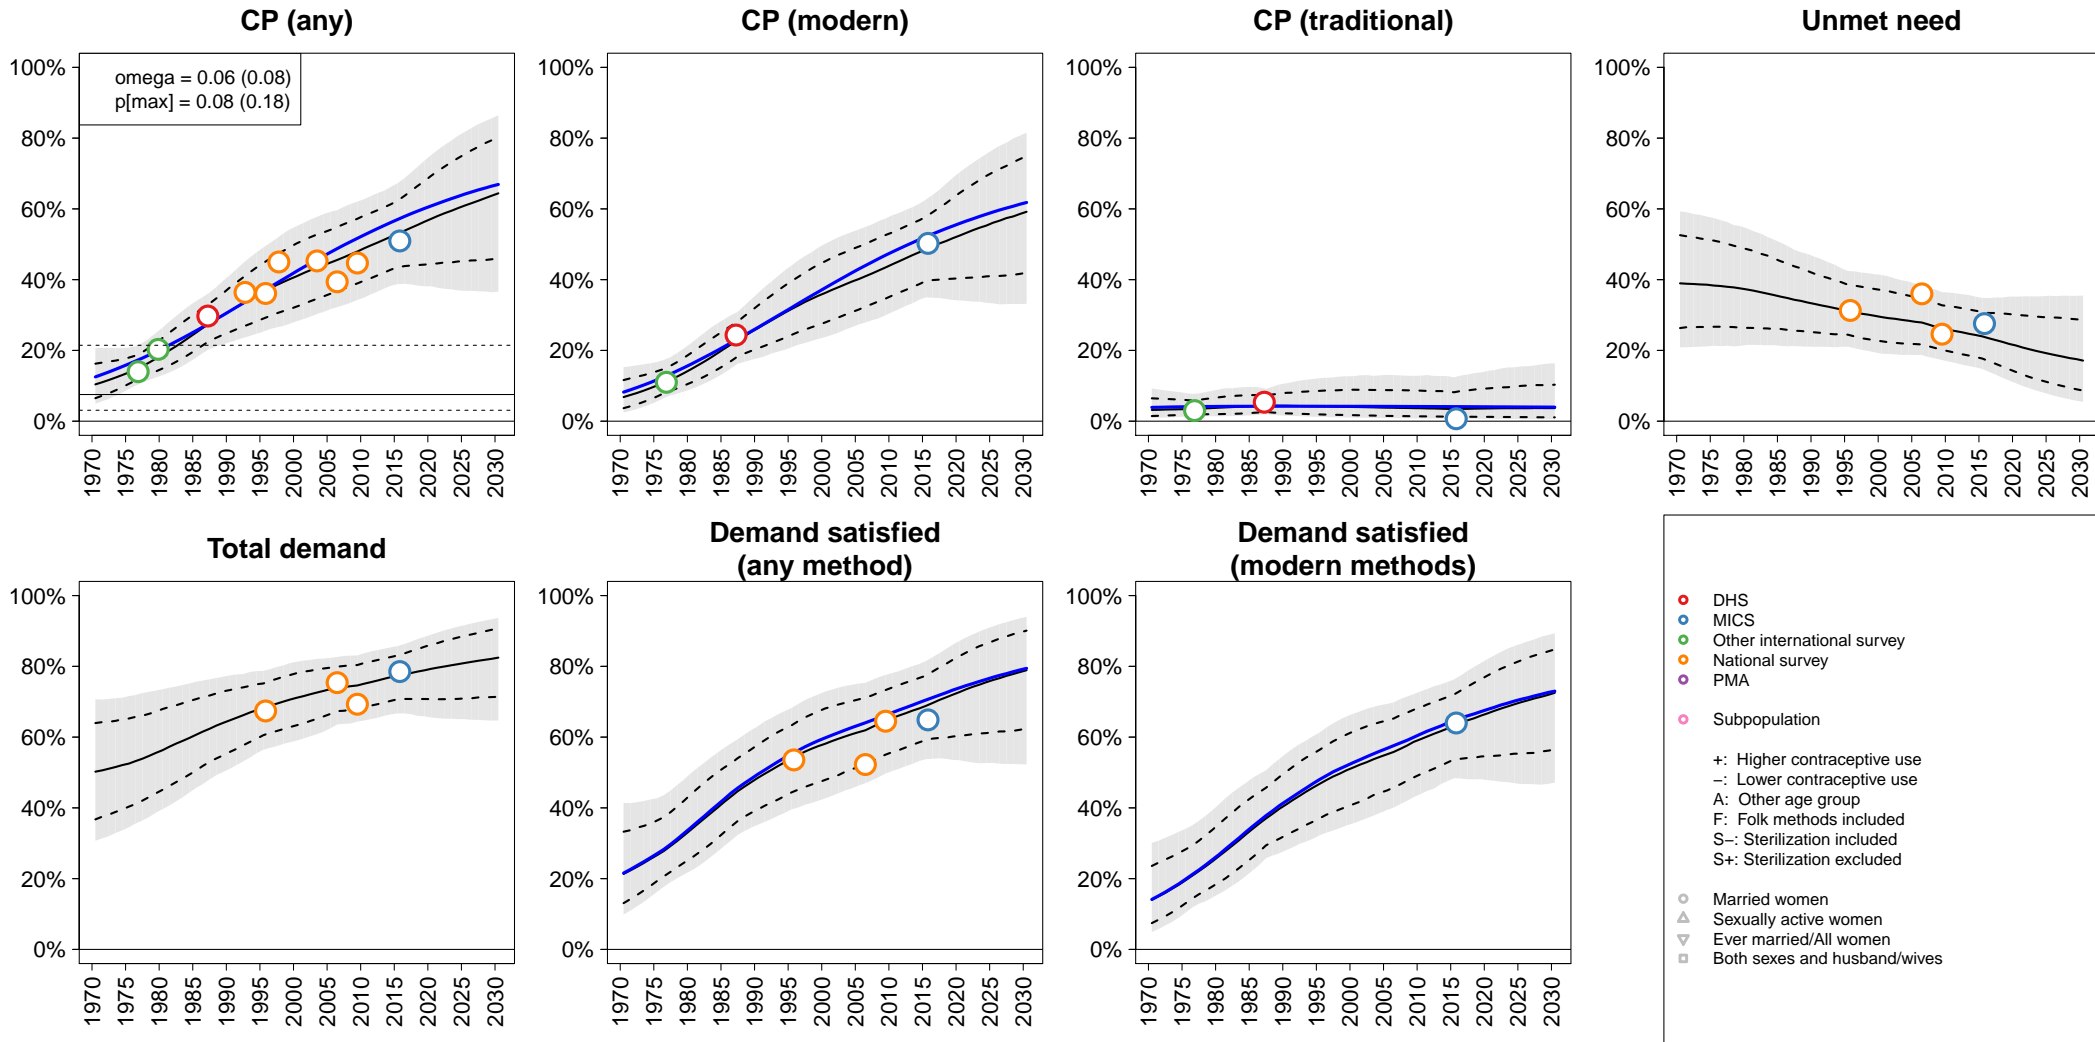

Mongolia (Eastern Asia) --- Married / In-Union

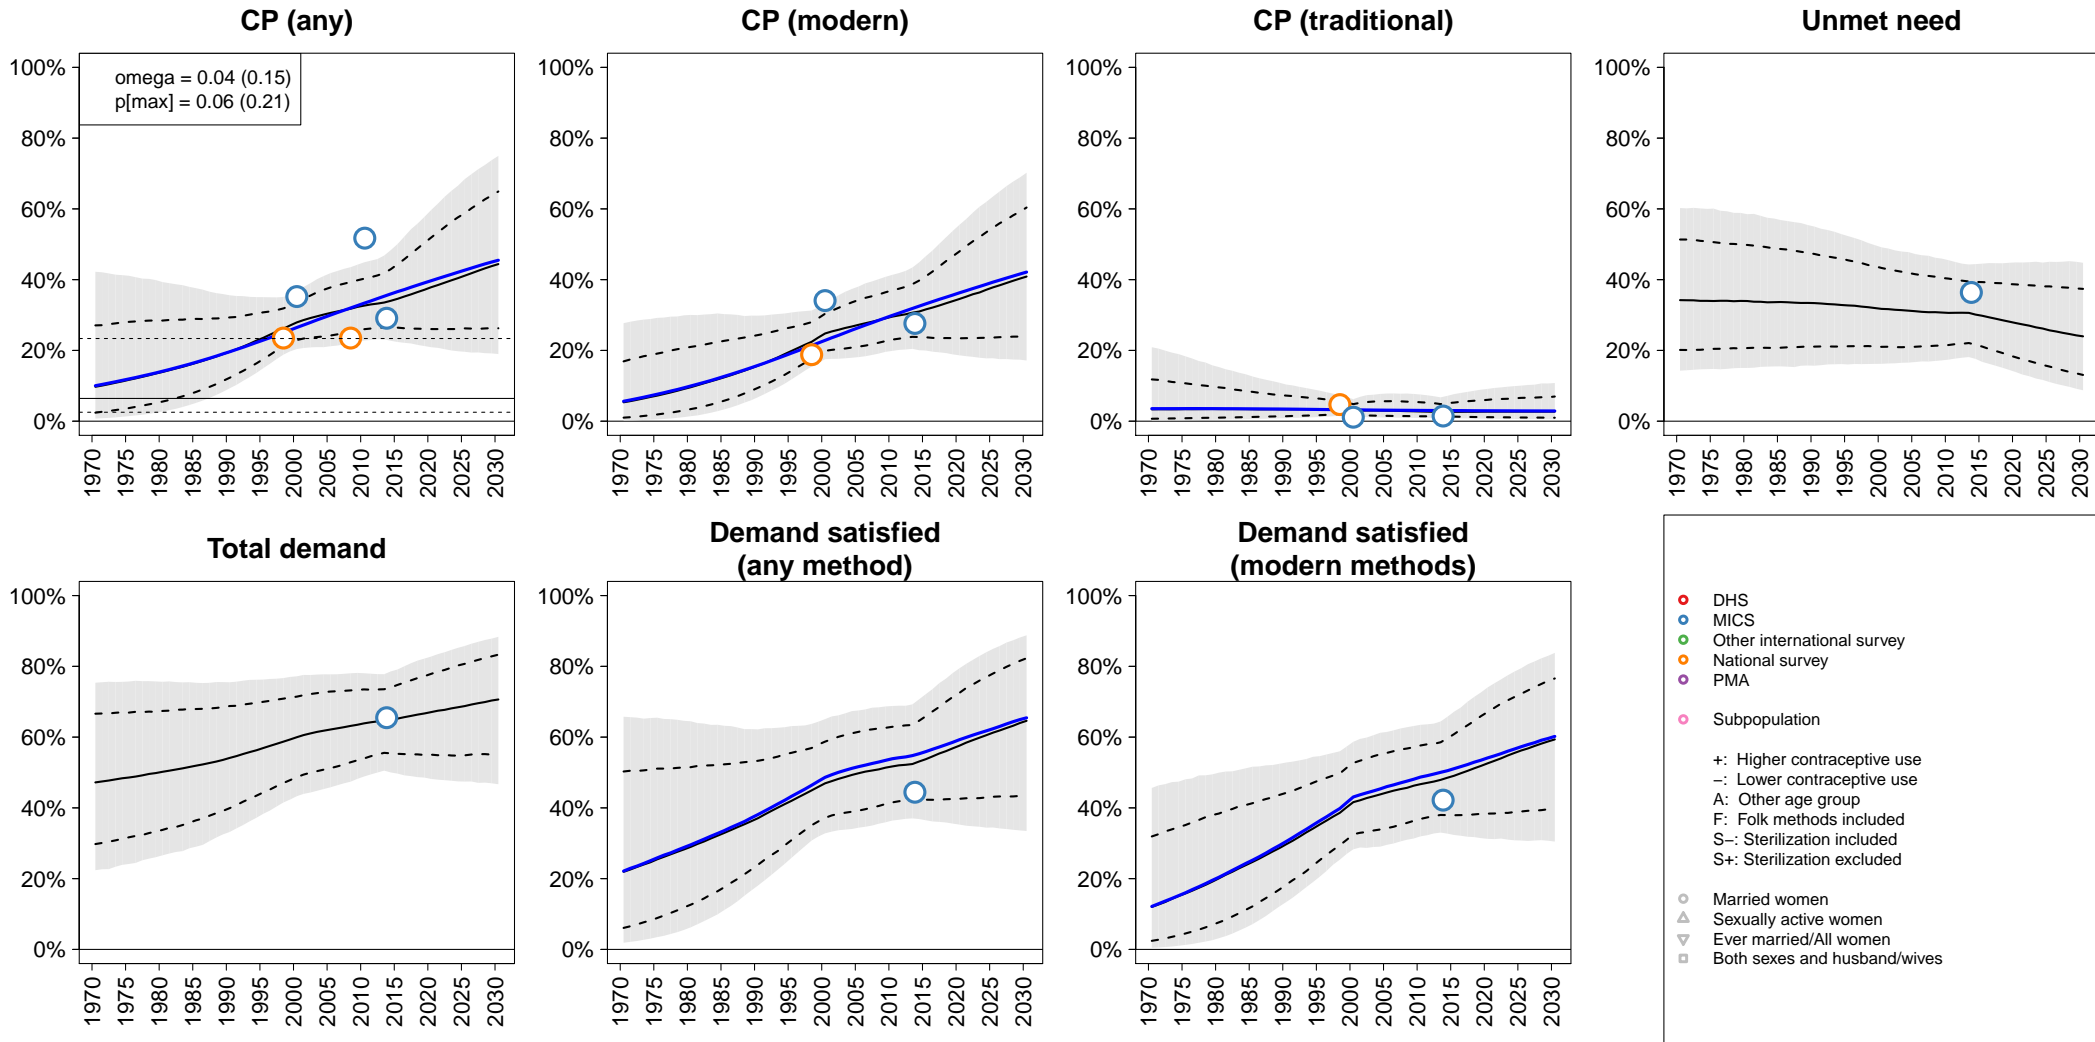

Morocco (Northern Africa) --- Married / In-Union

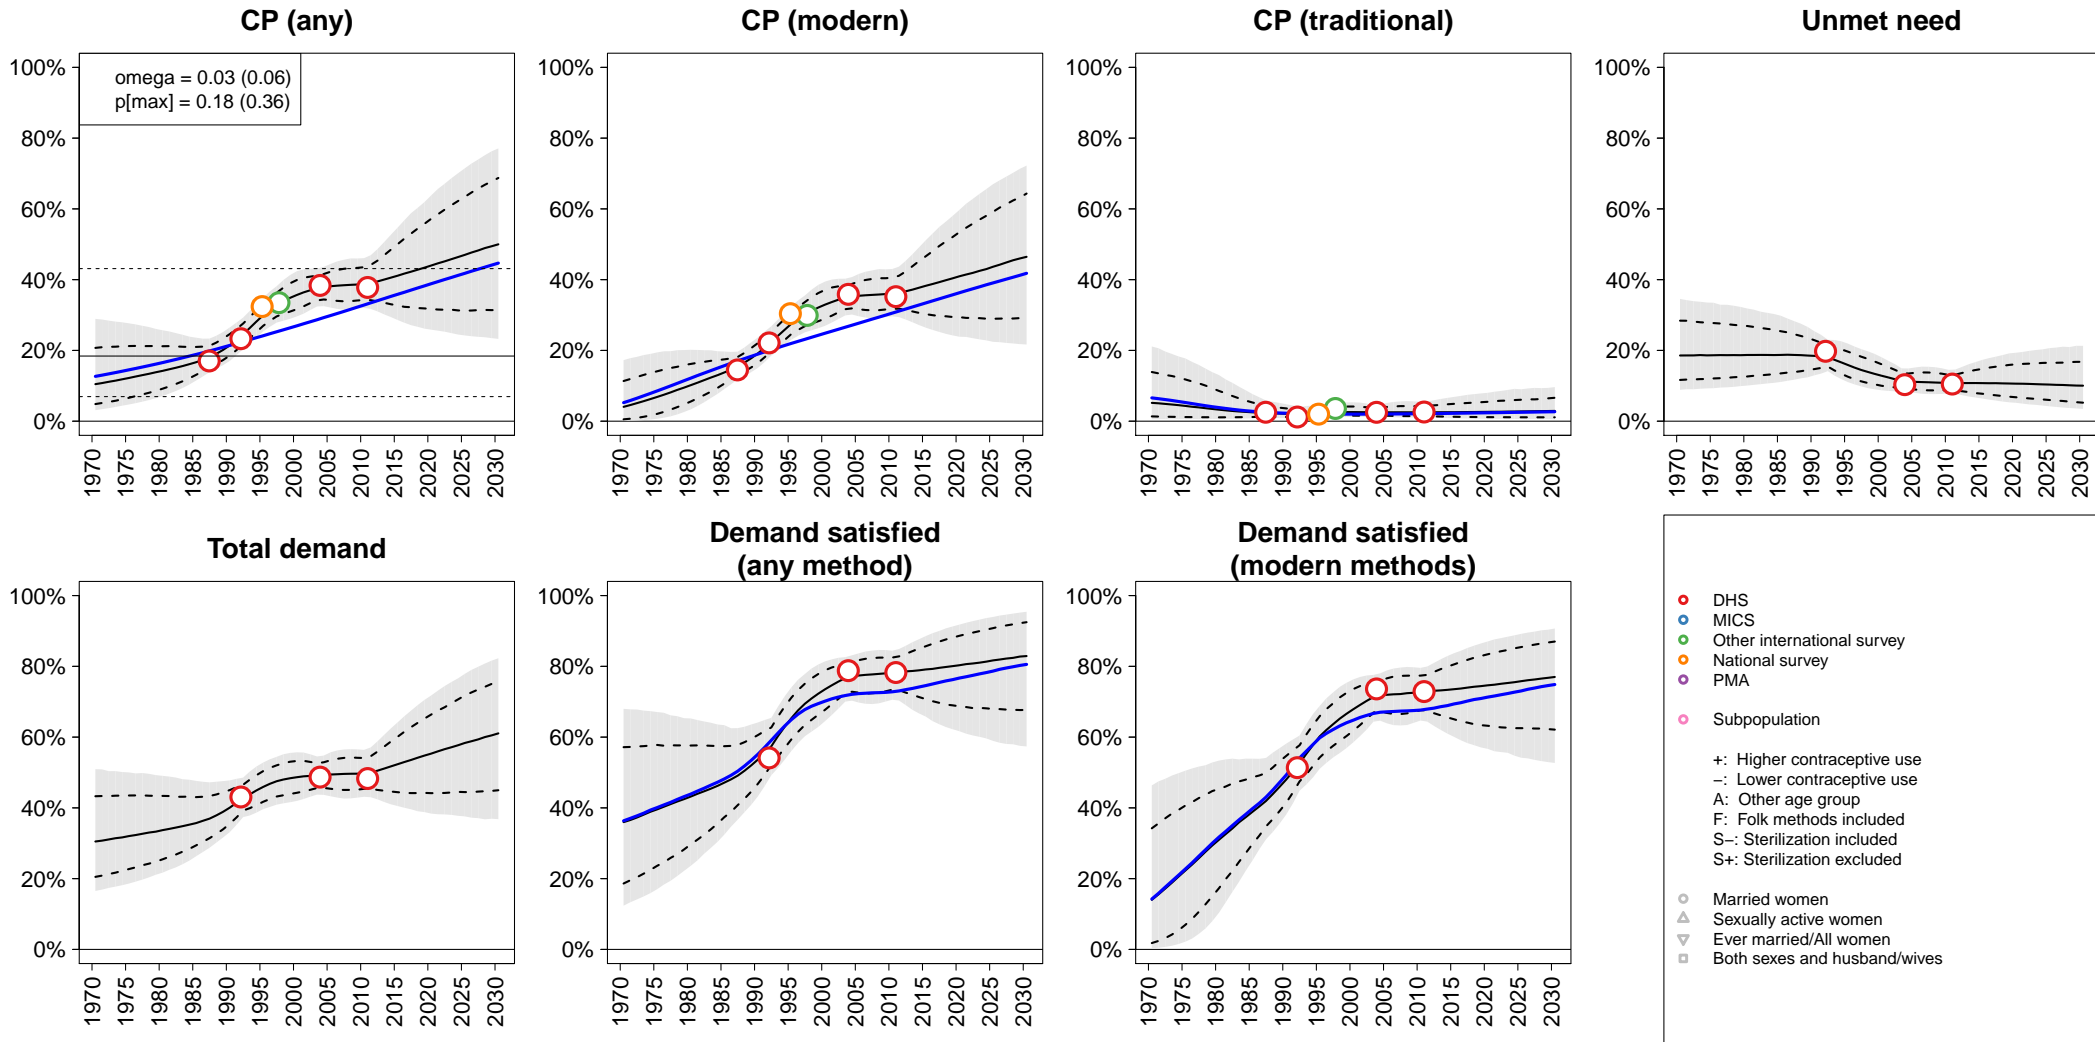

Mozambique (Eastern Africa) --- Married / In-Union

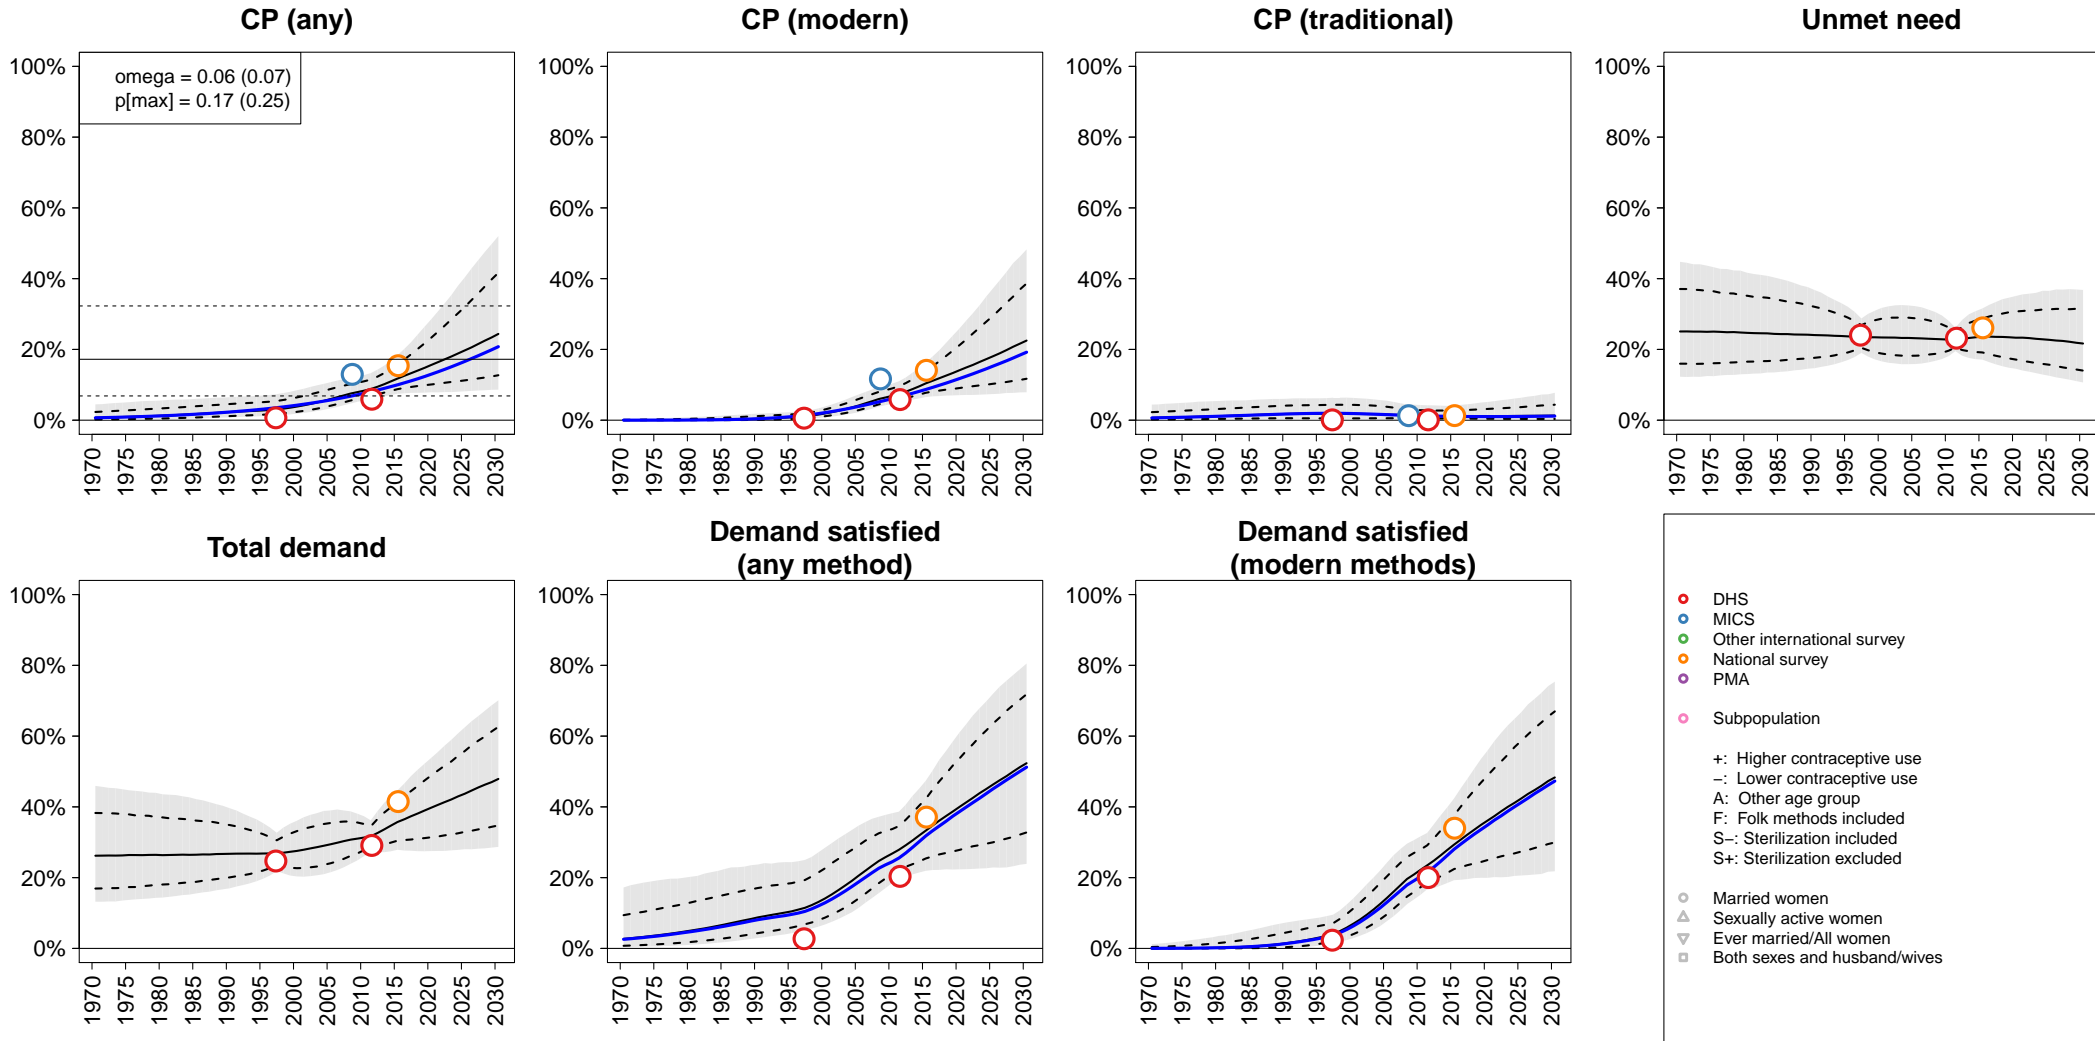

Myanmar (South-eastern Asia) --- Married / In-Union

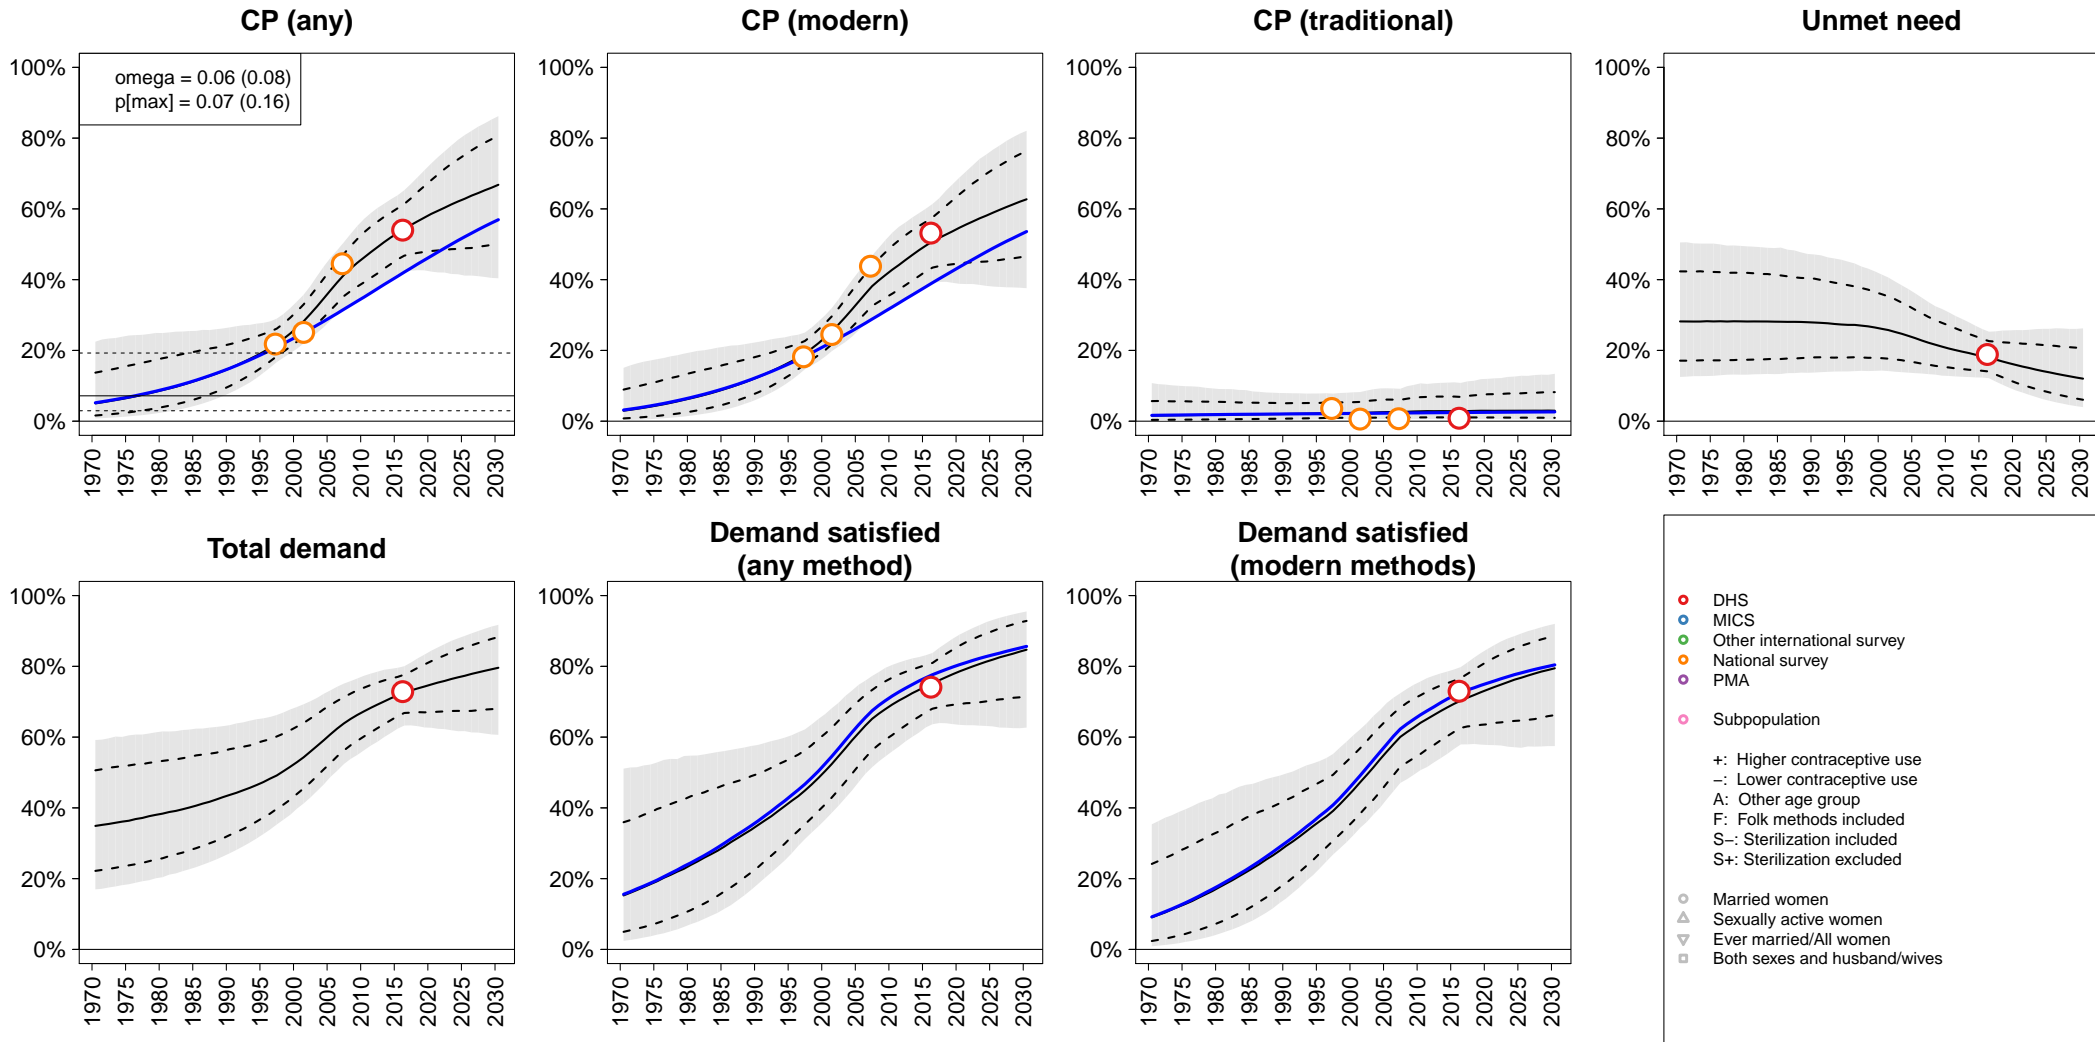

### Namibia (Southern Africa) --- Married / In-Union

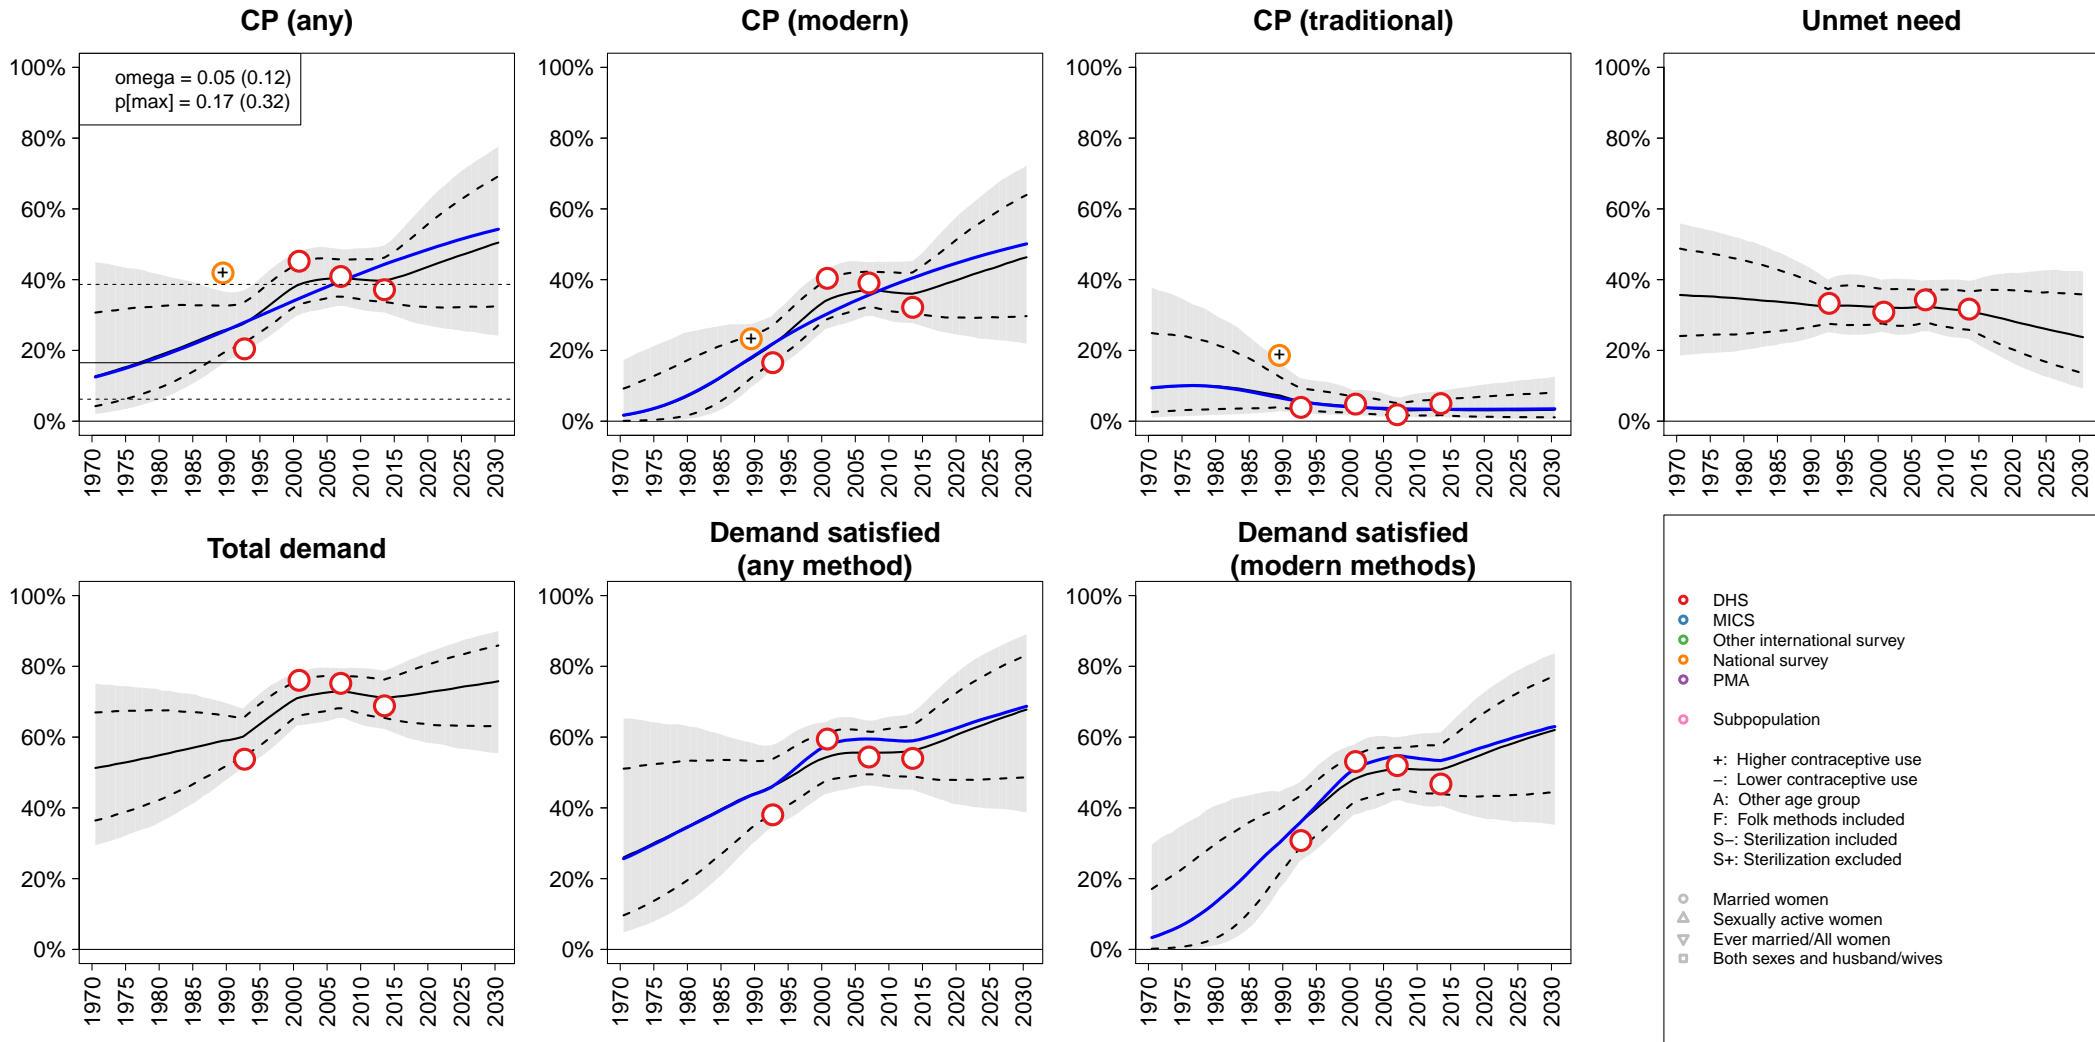

Nepal (Southern Asia) --- Married / In-Union

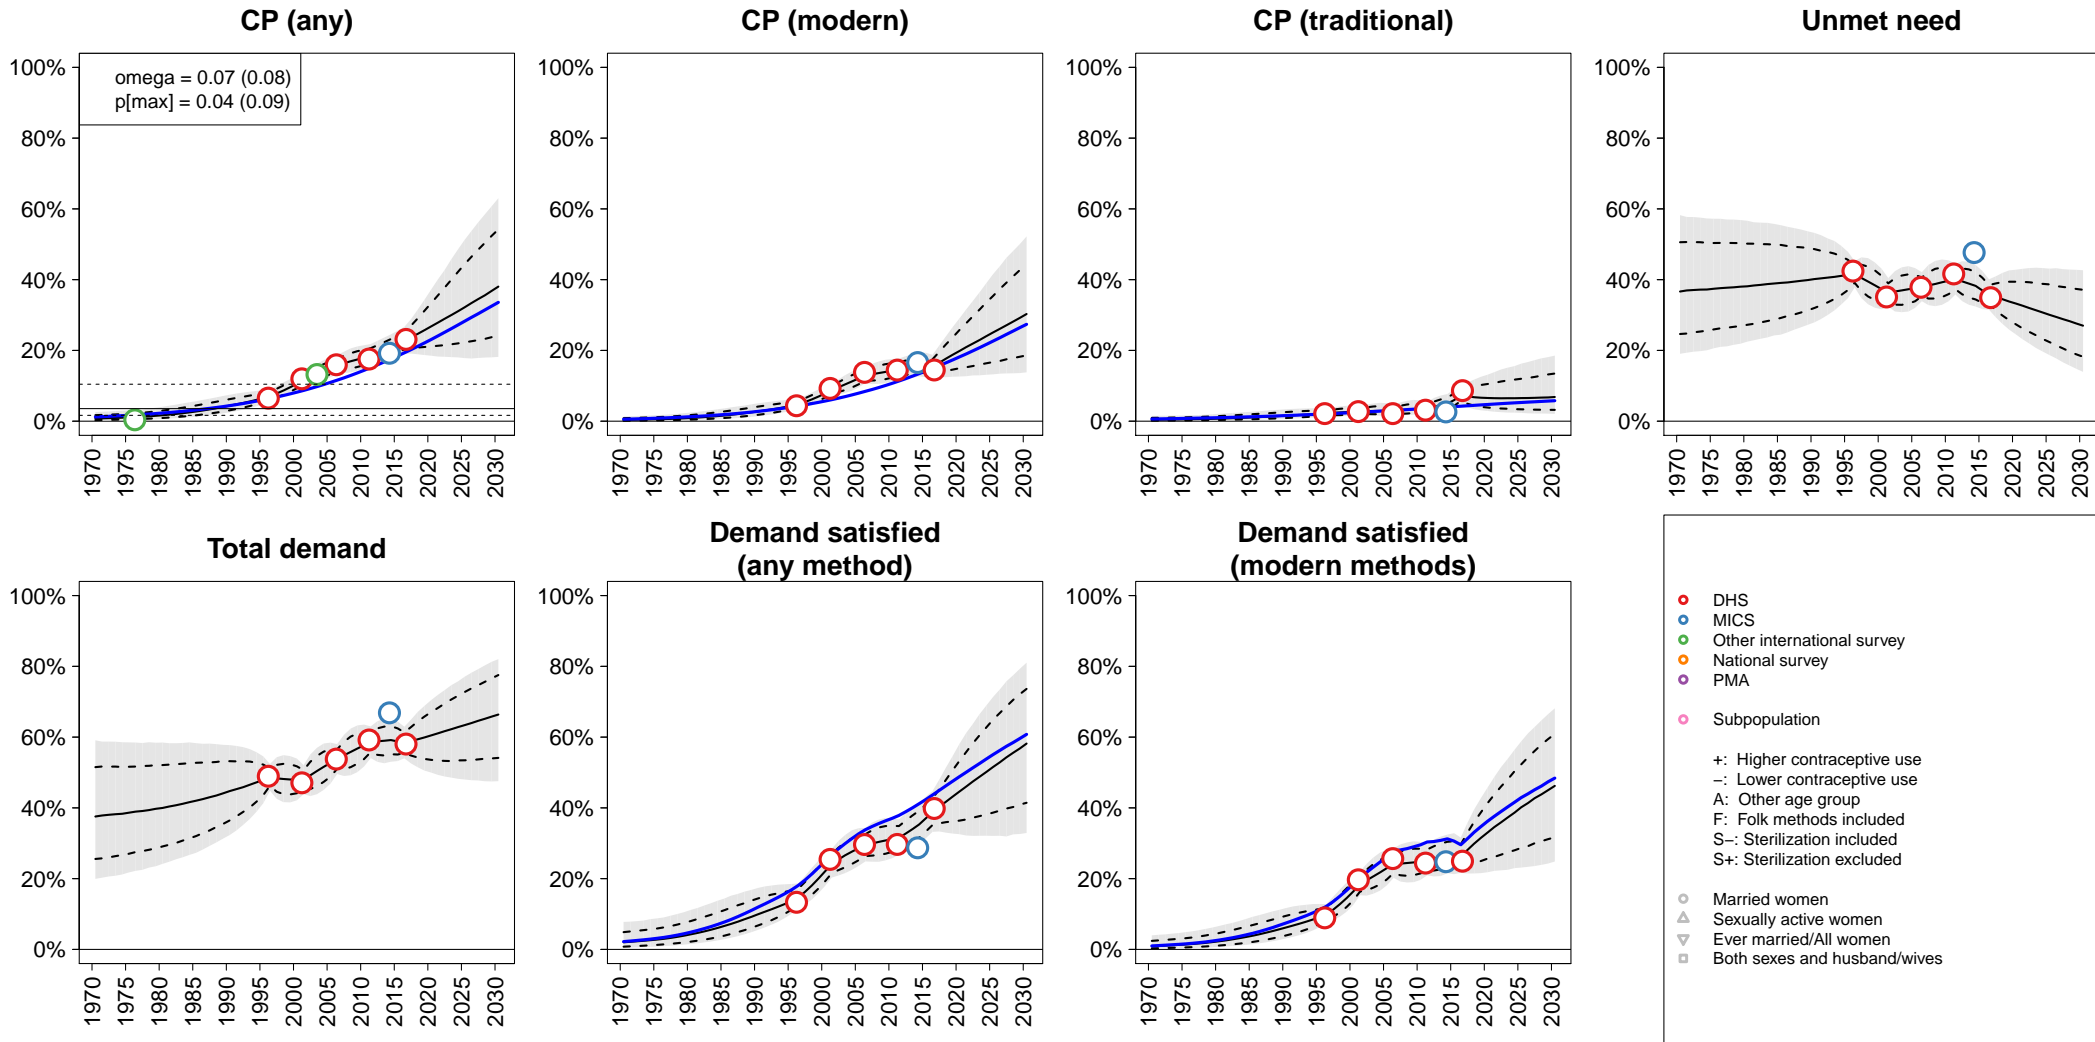



Nicaragua (Central America) --- Married / In-Union

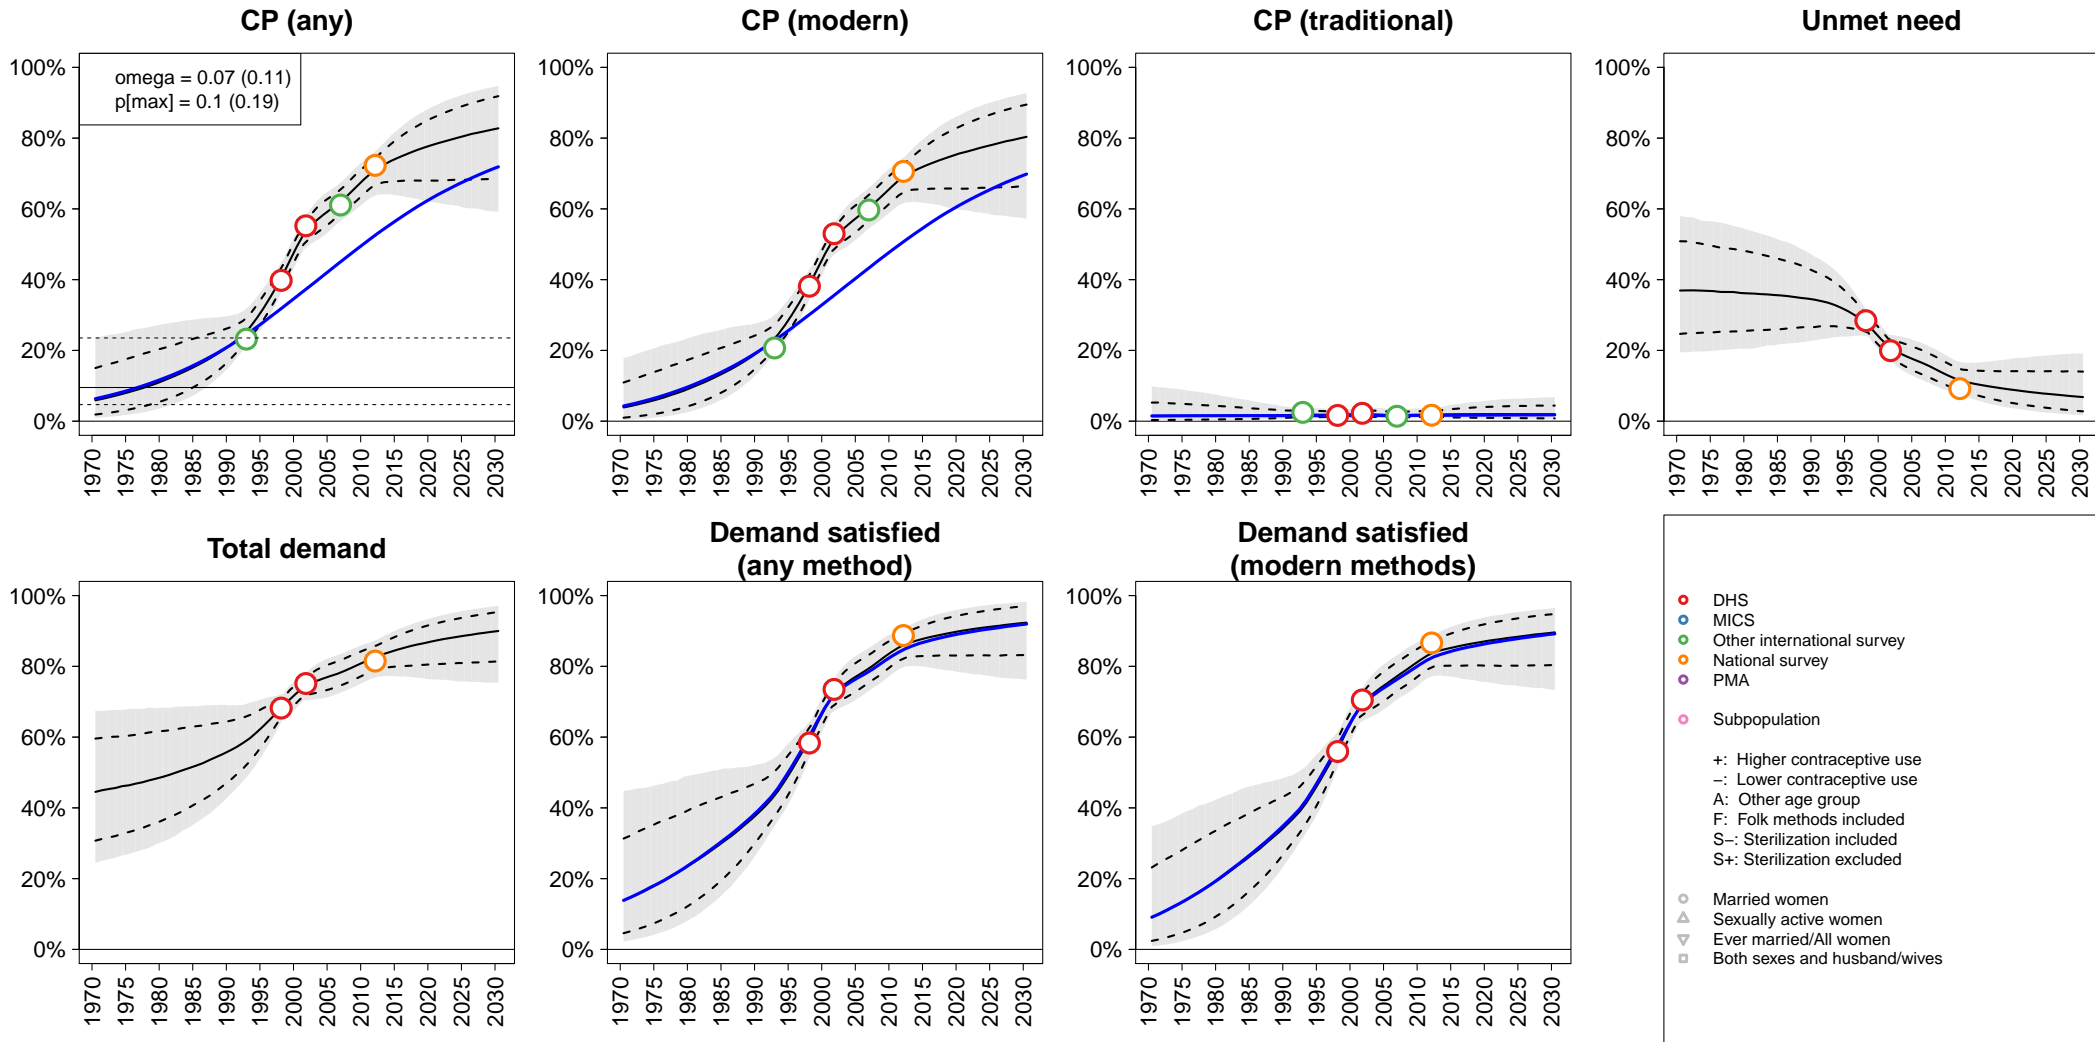

### Niger (Western Africa) --- Married / In-Union

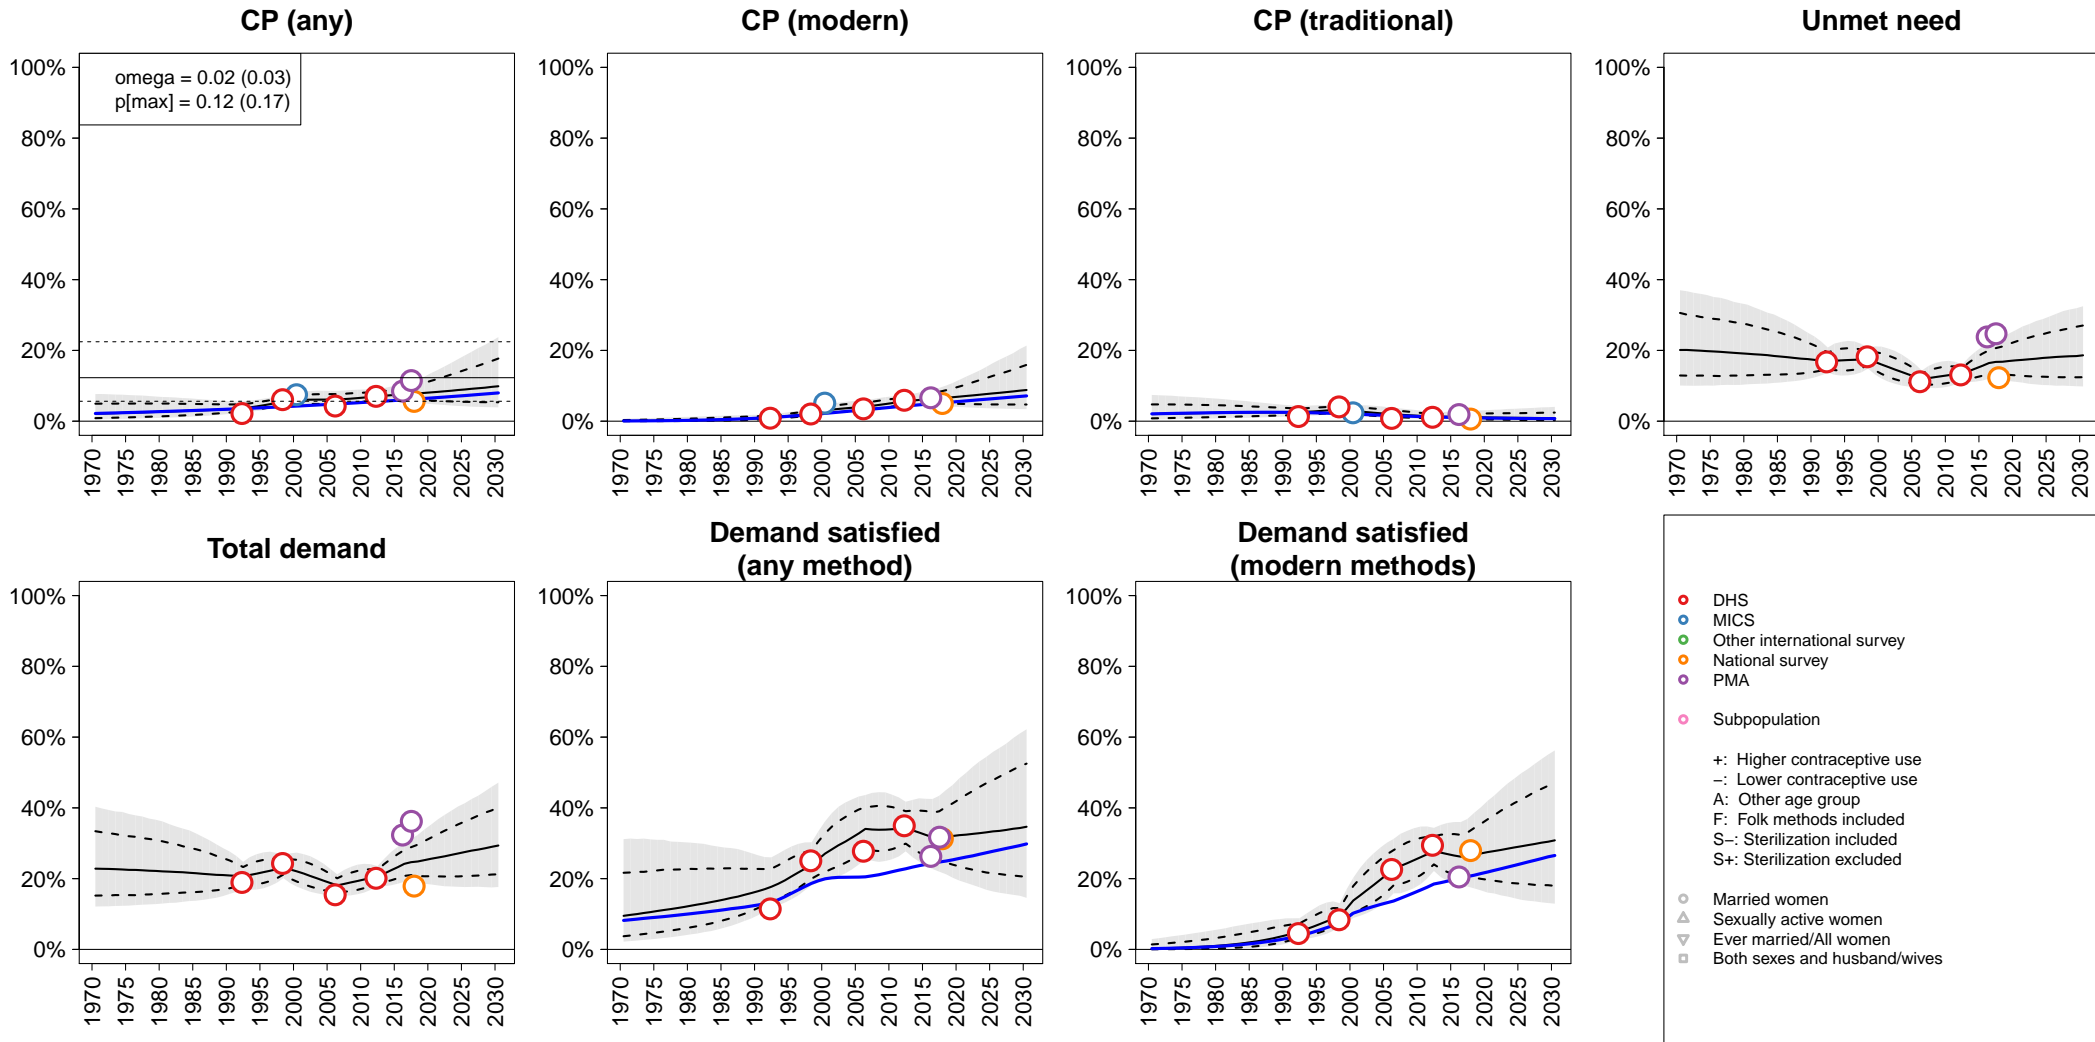

### Nigeria (Western Africa) --- Married / In-Union

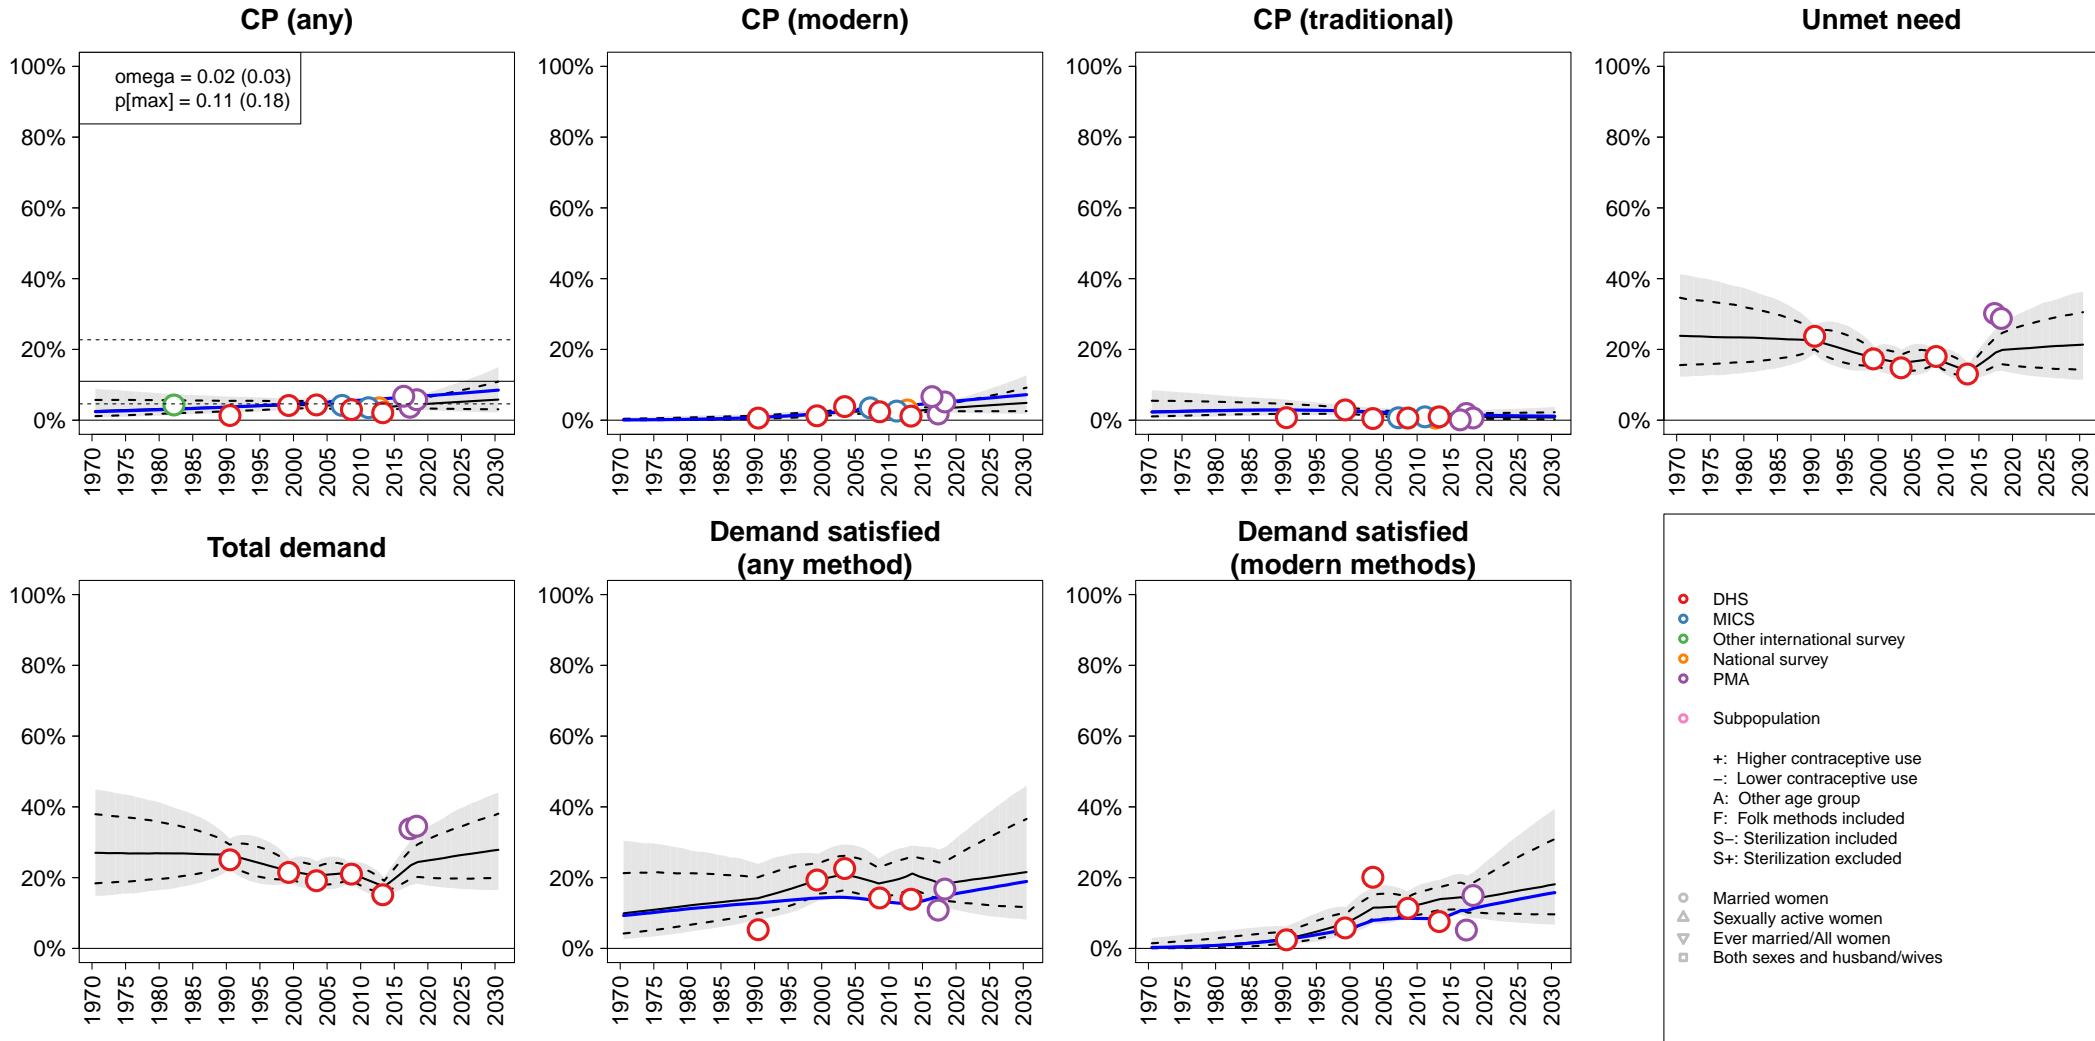

Oman (Western Asia) --- Married / In-Union

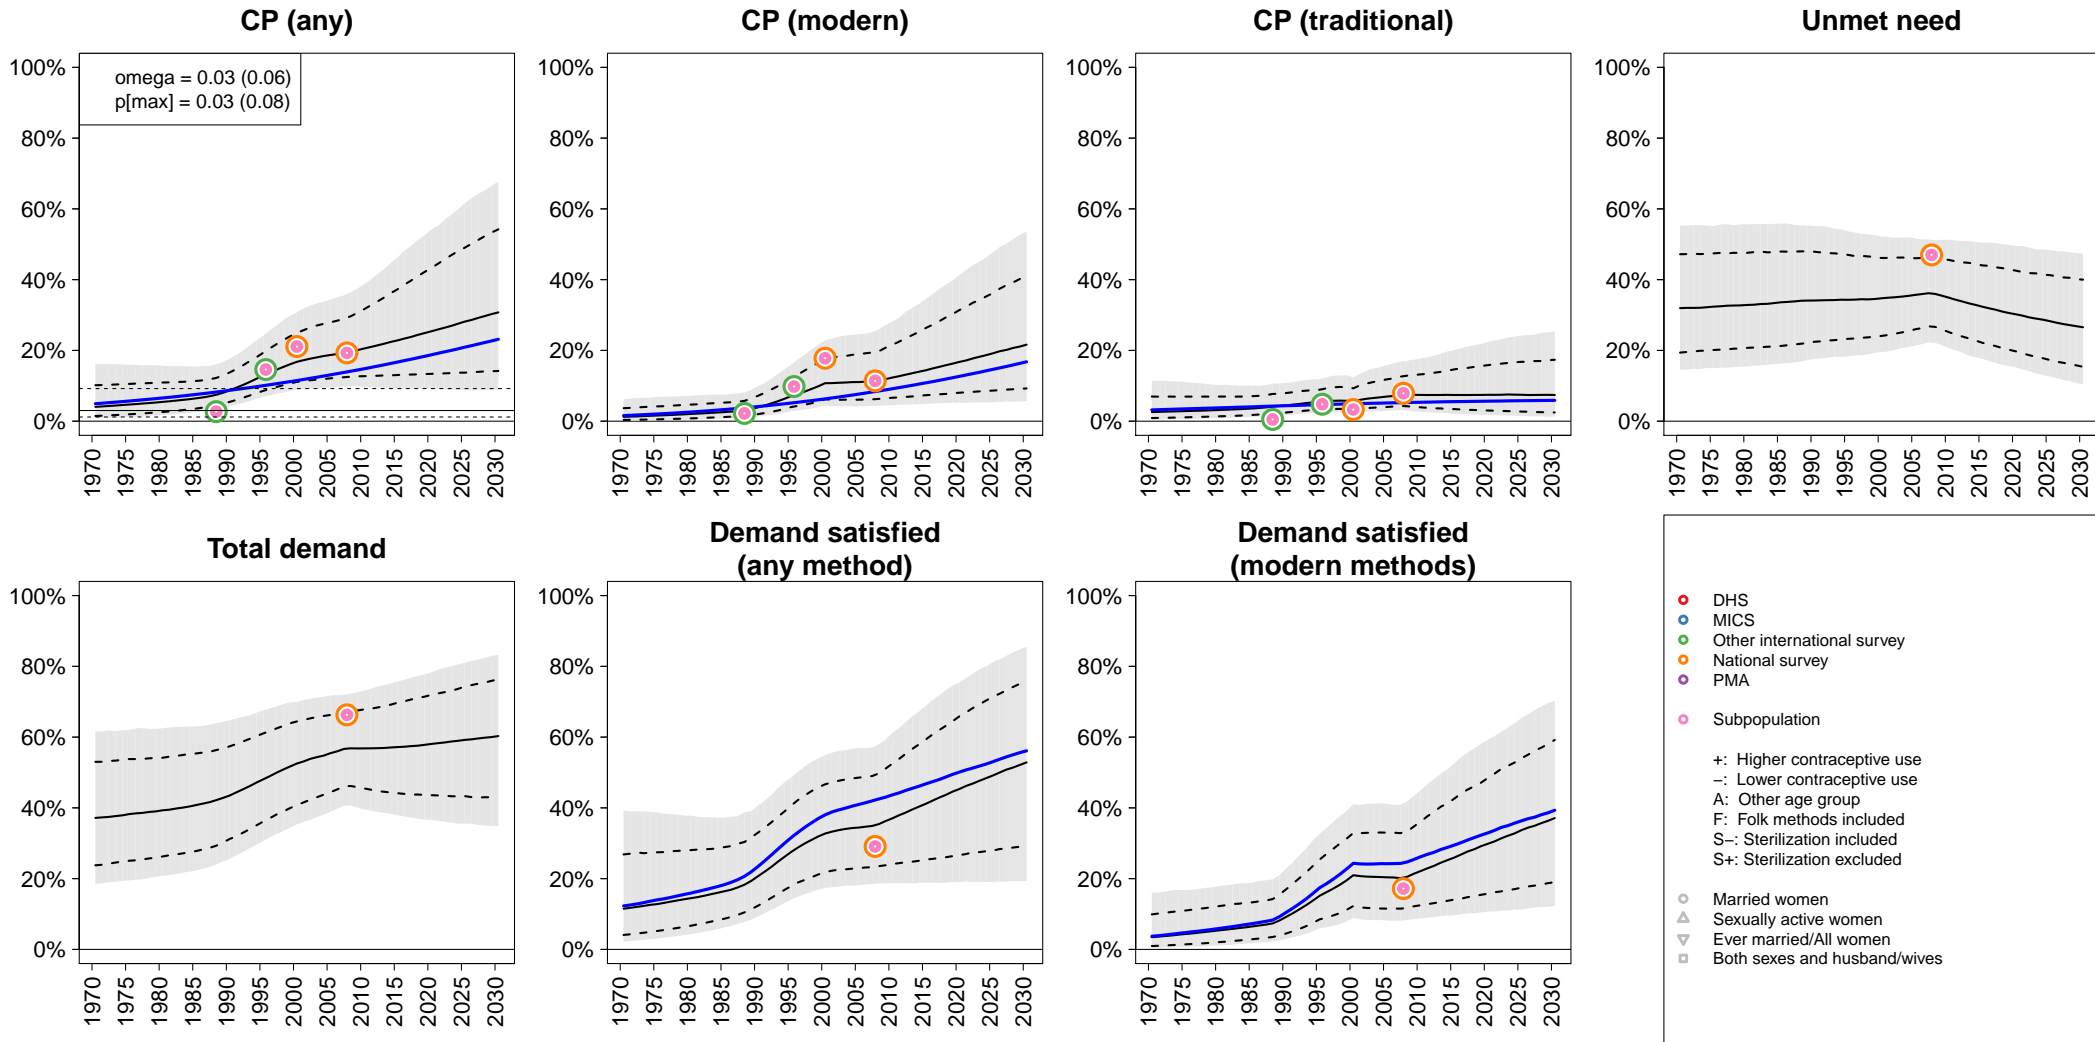

Pakistan (Southern Asia) --- Married / In-Union

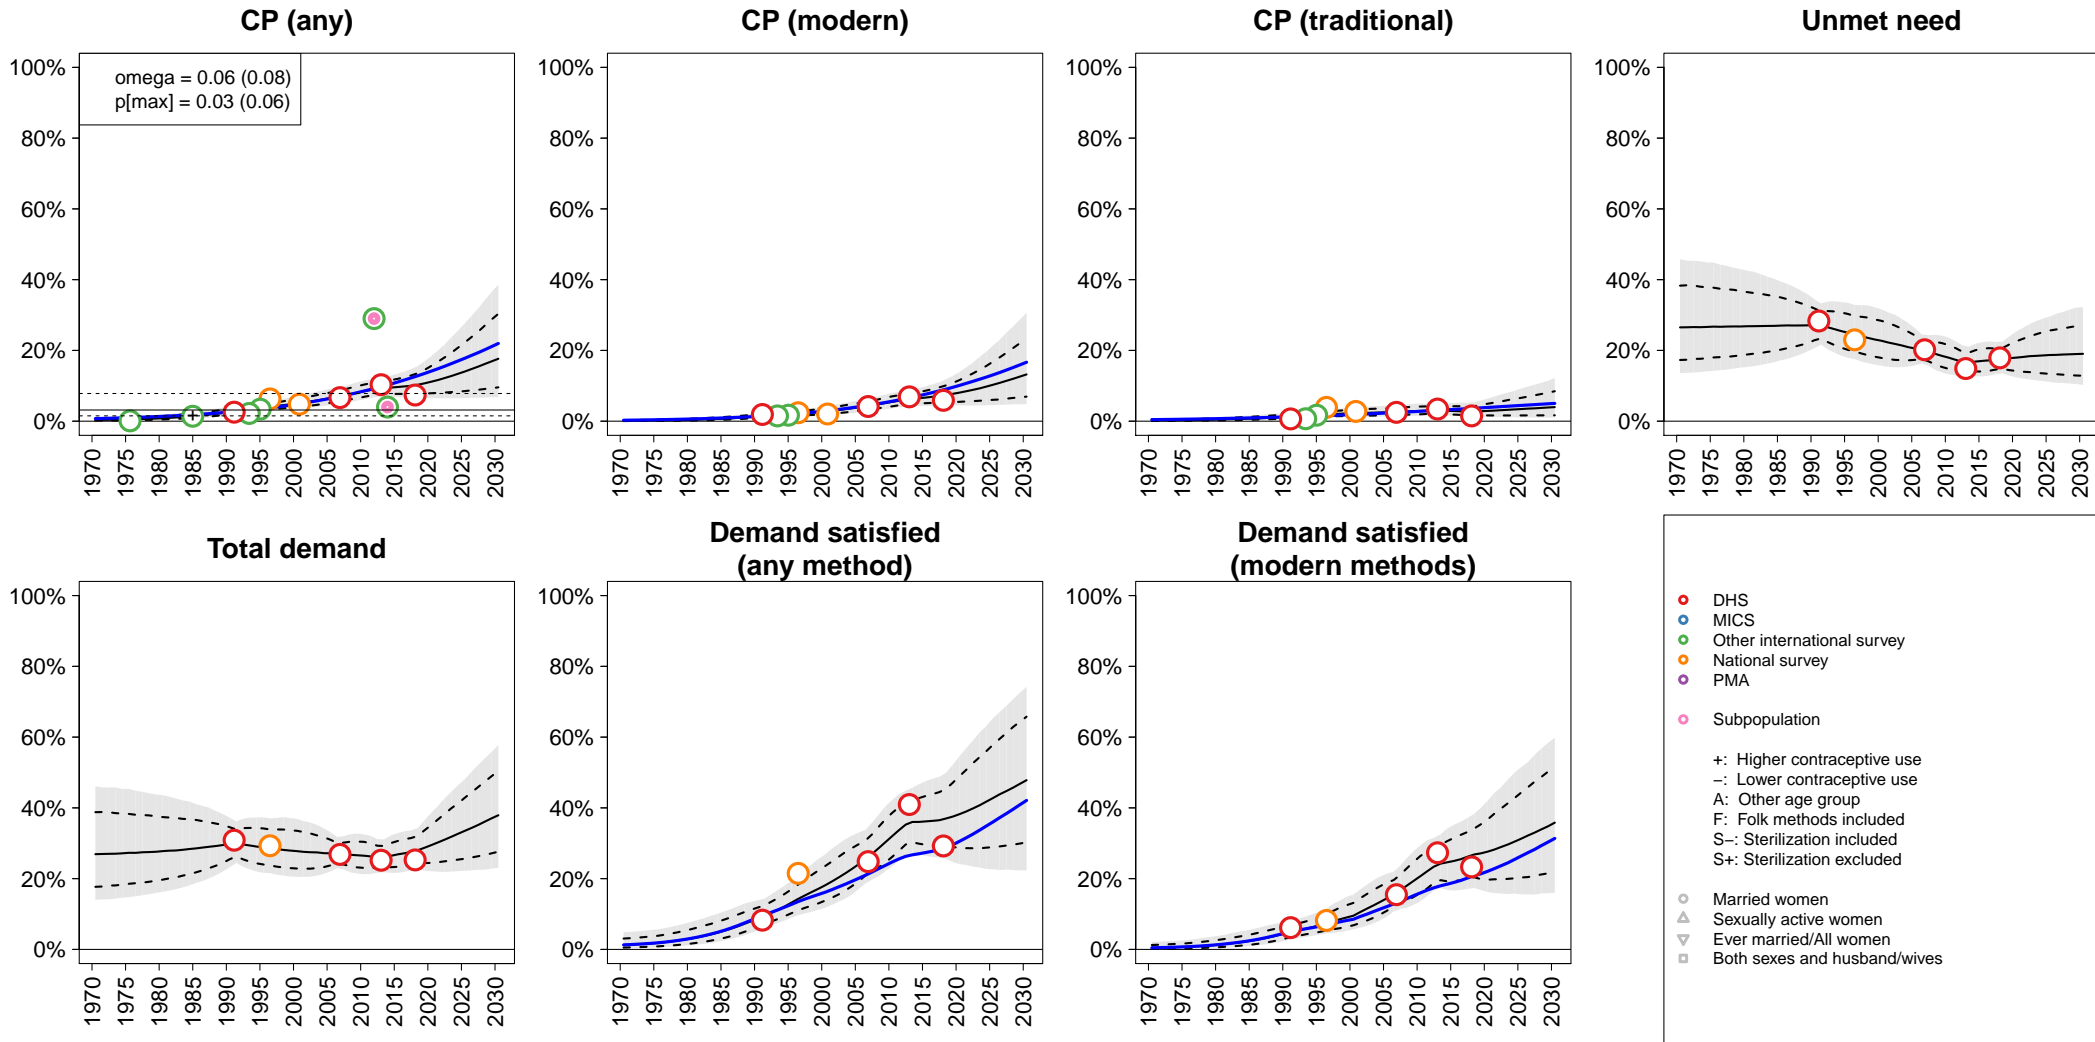

Panama (Central America) --- Married / In-Union

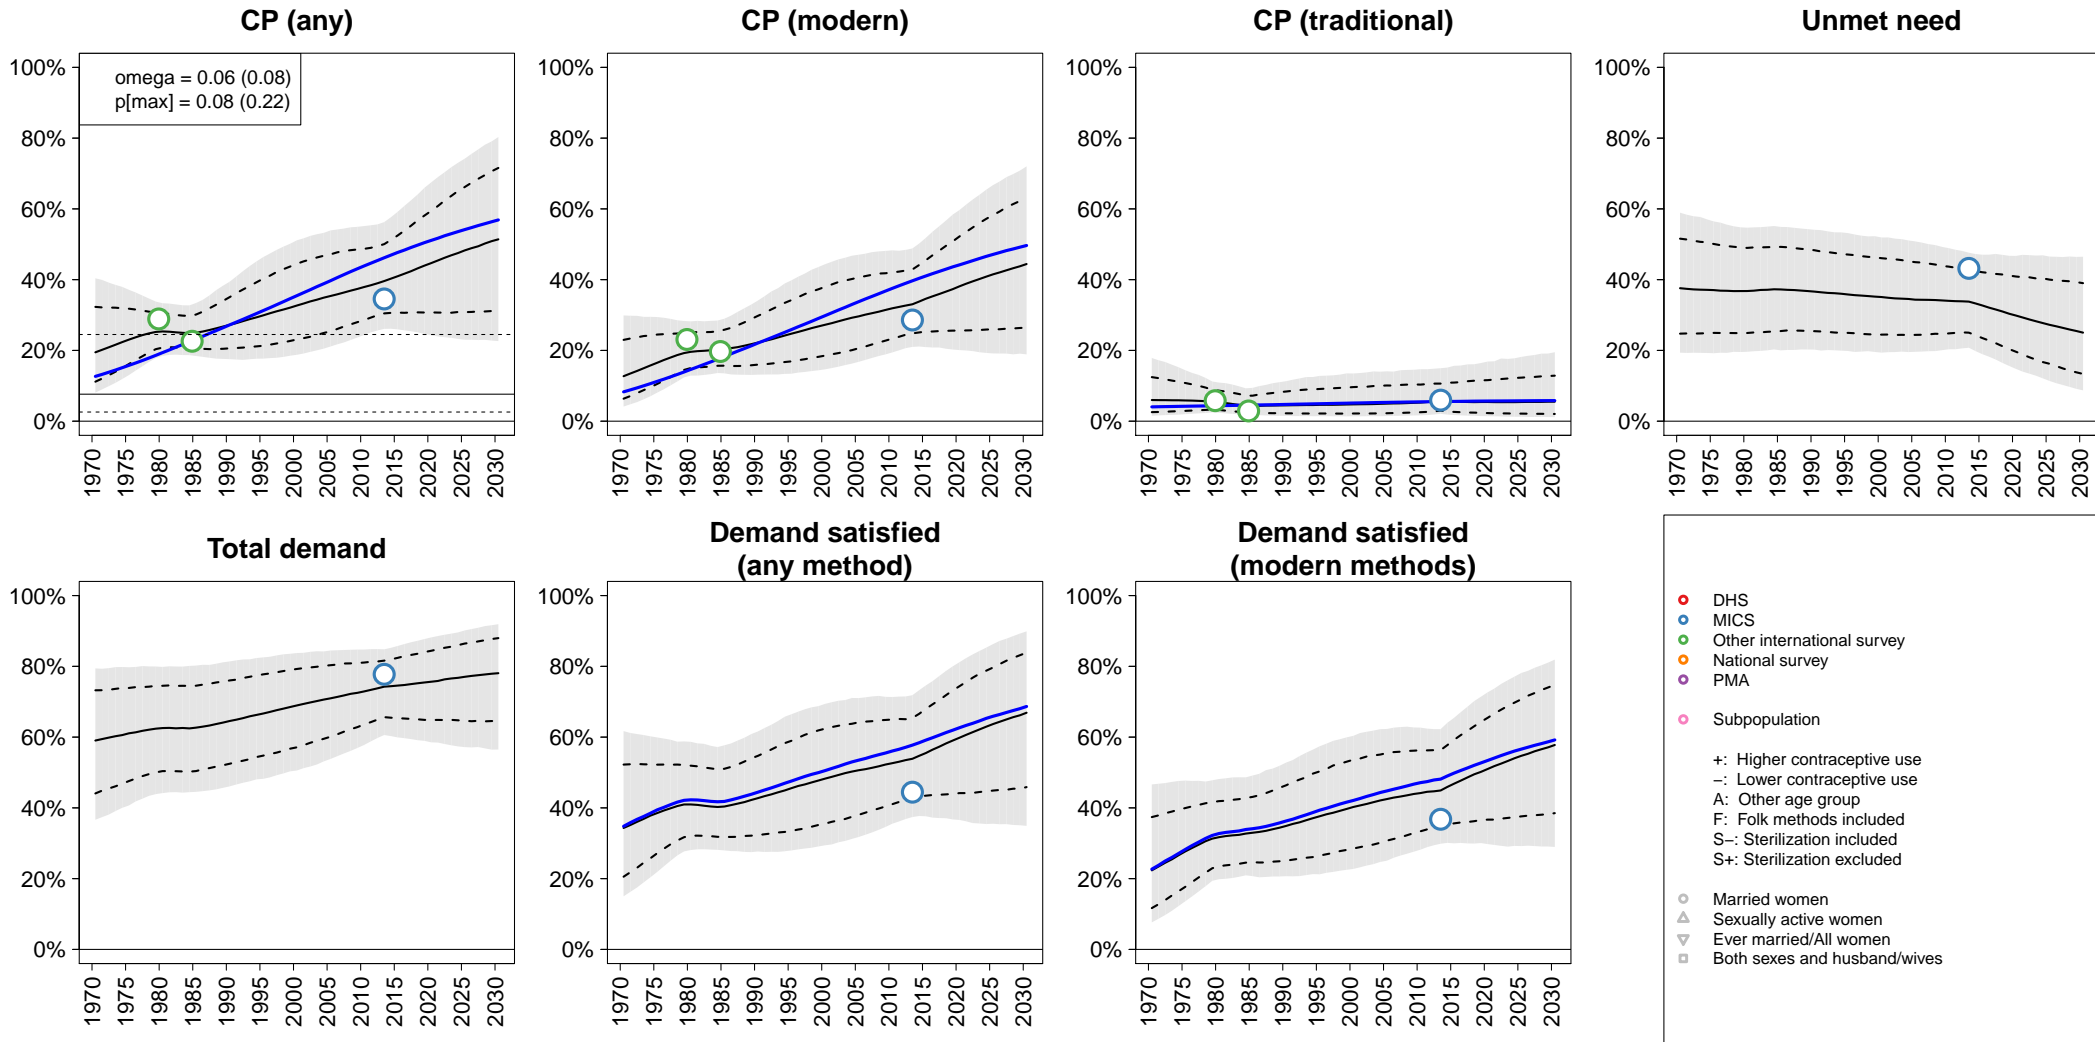

Papua New Guinea (Melanesia) --- Married / In-Union

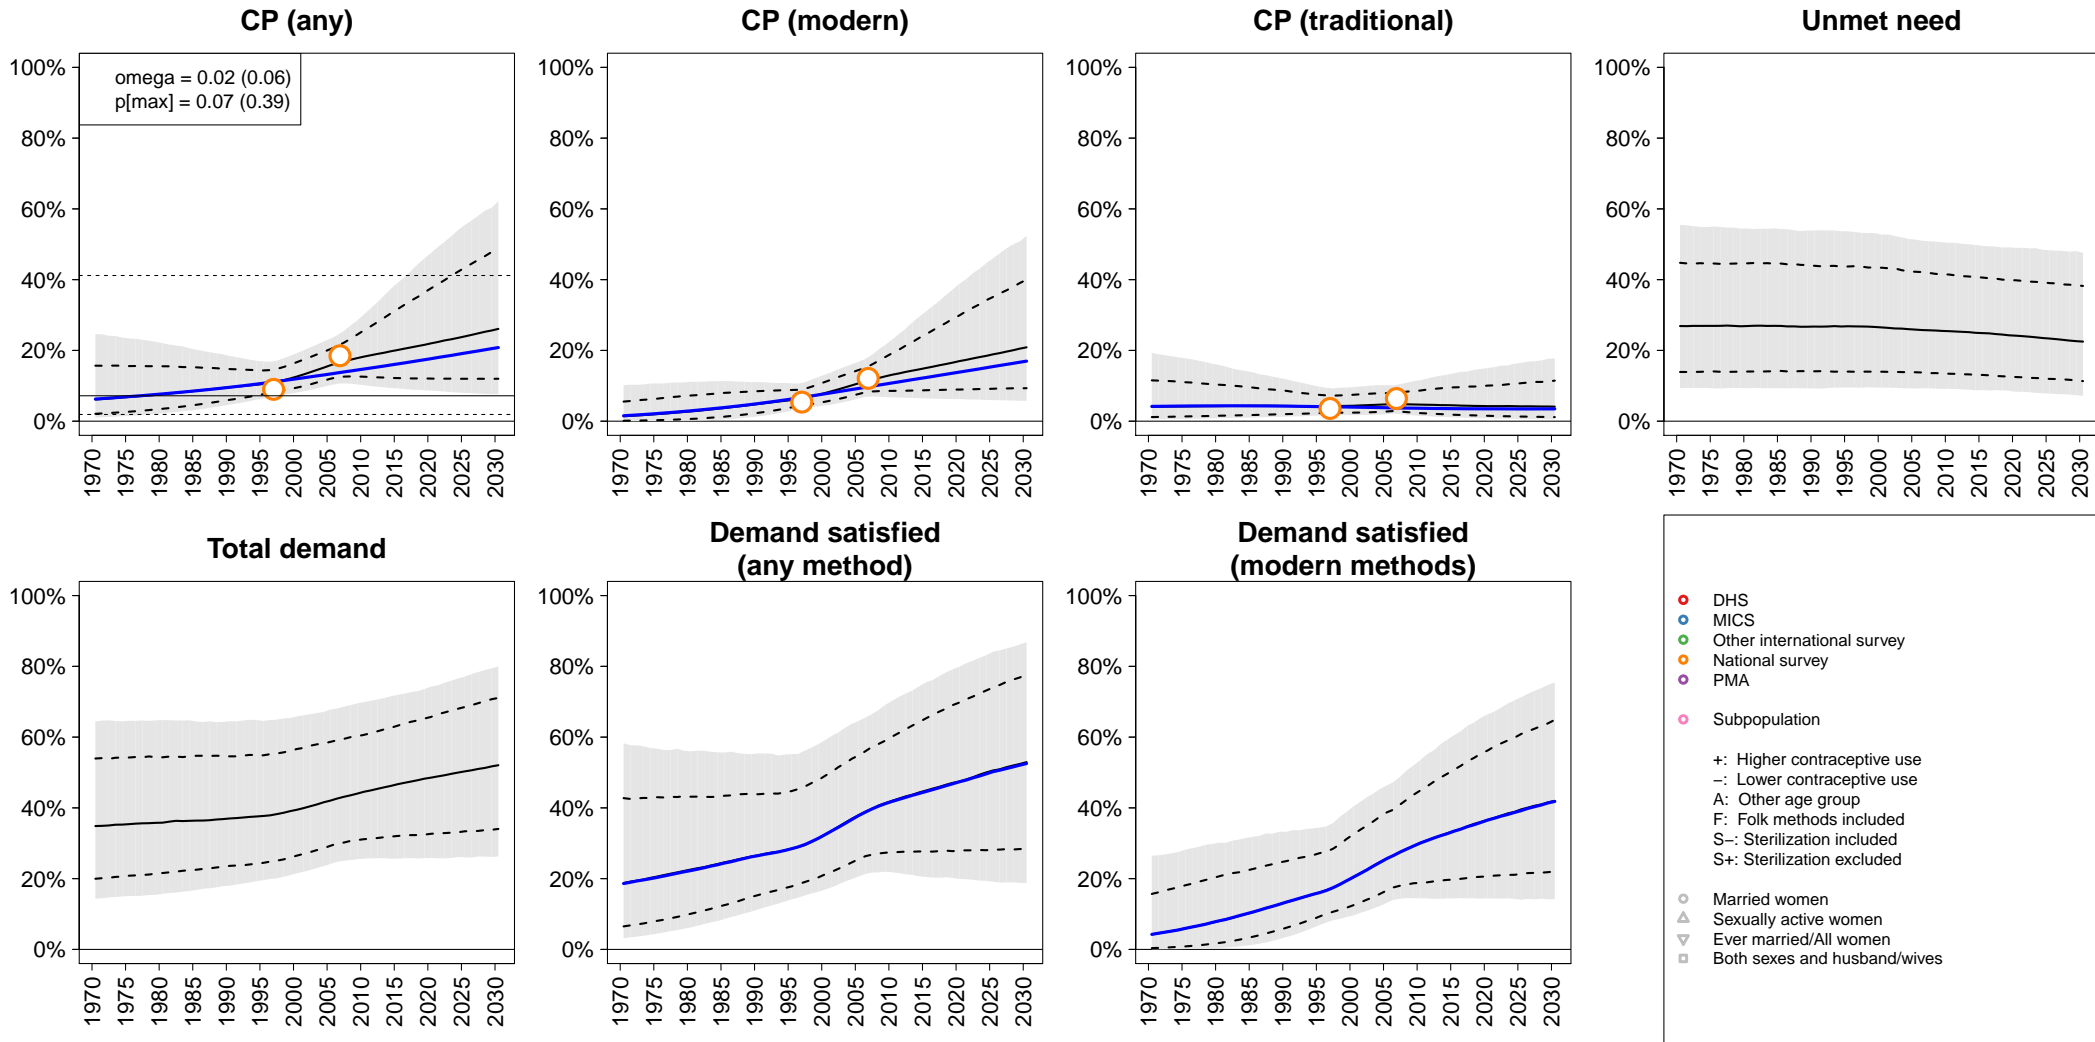

Paraguay (South America) --- Married / In-Union

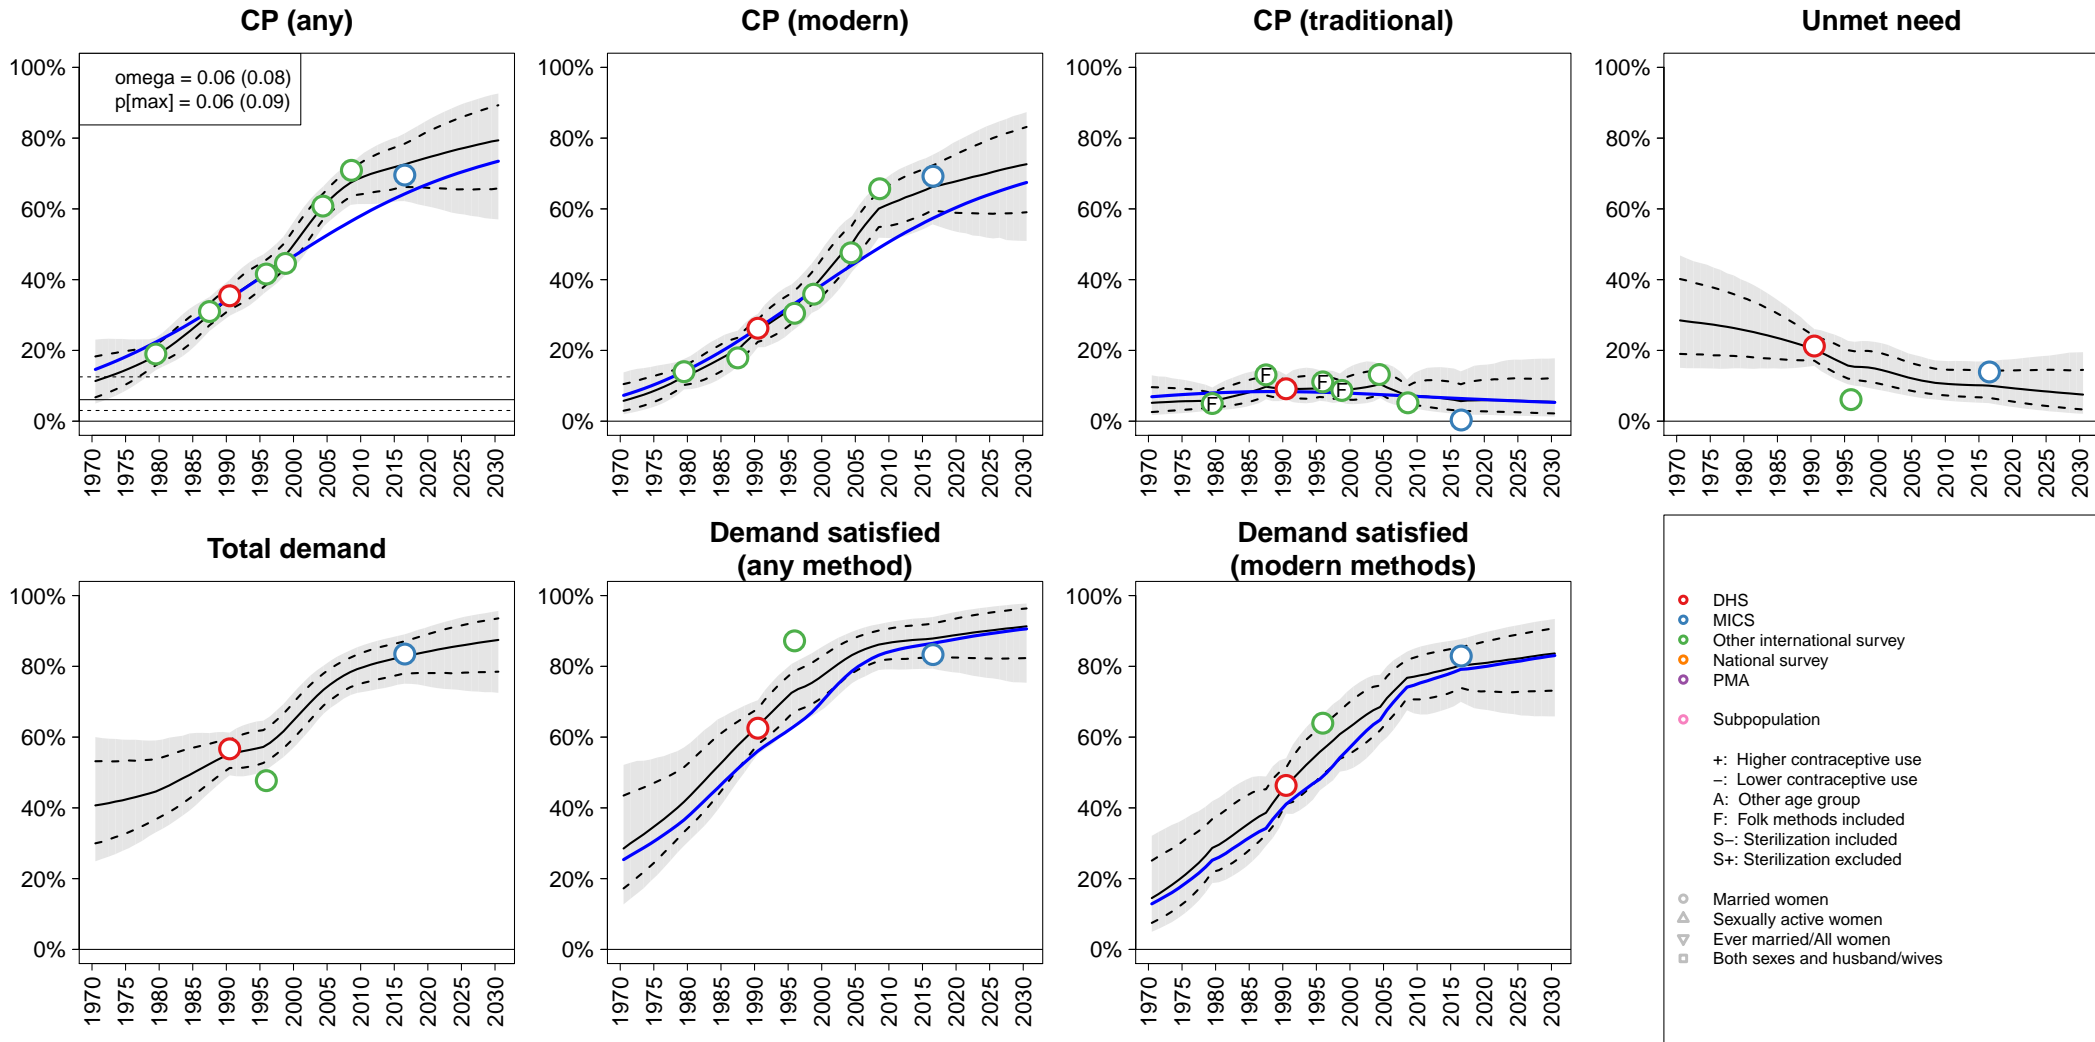



Peru (South America) --- Married / In-Union

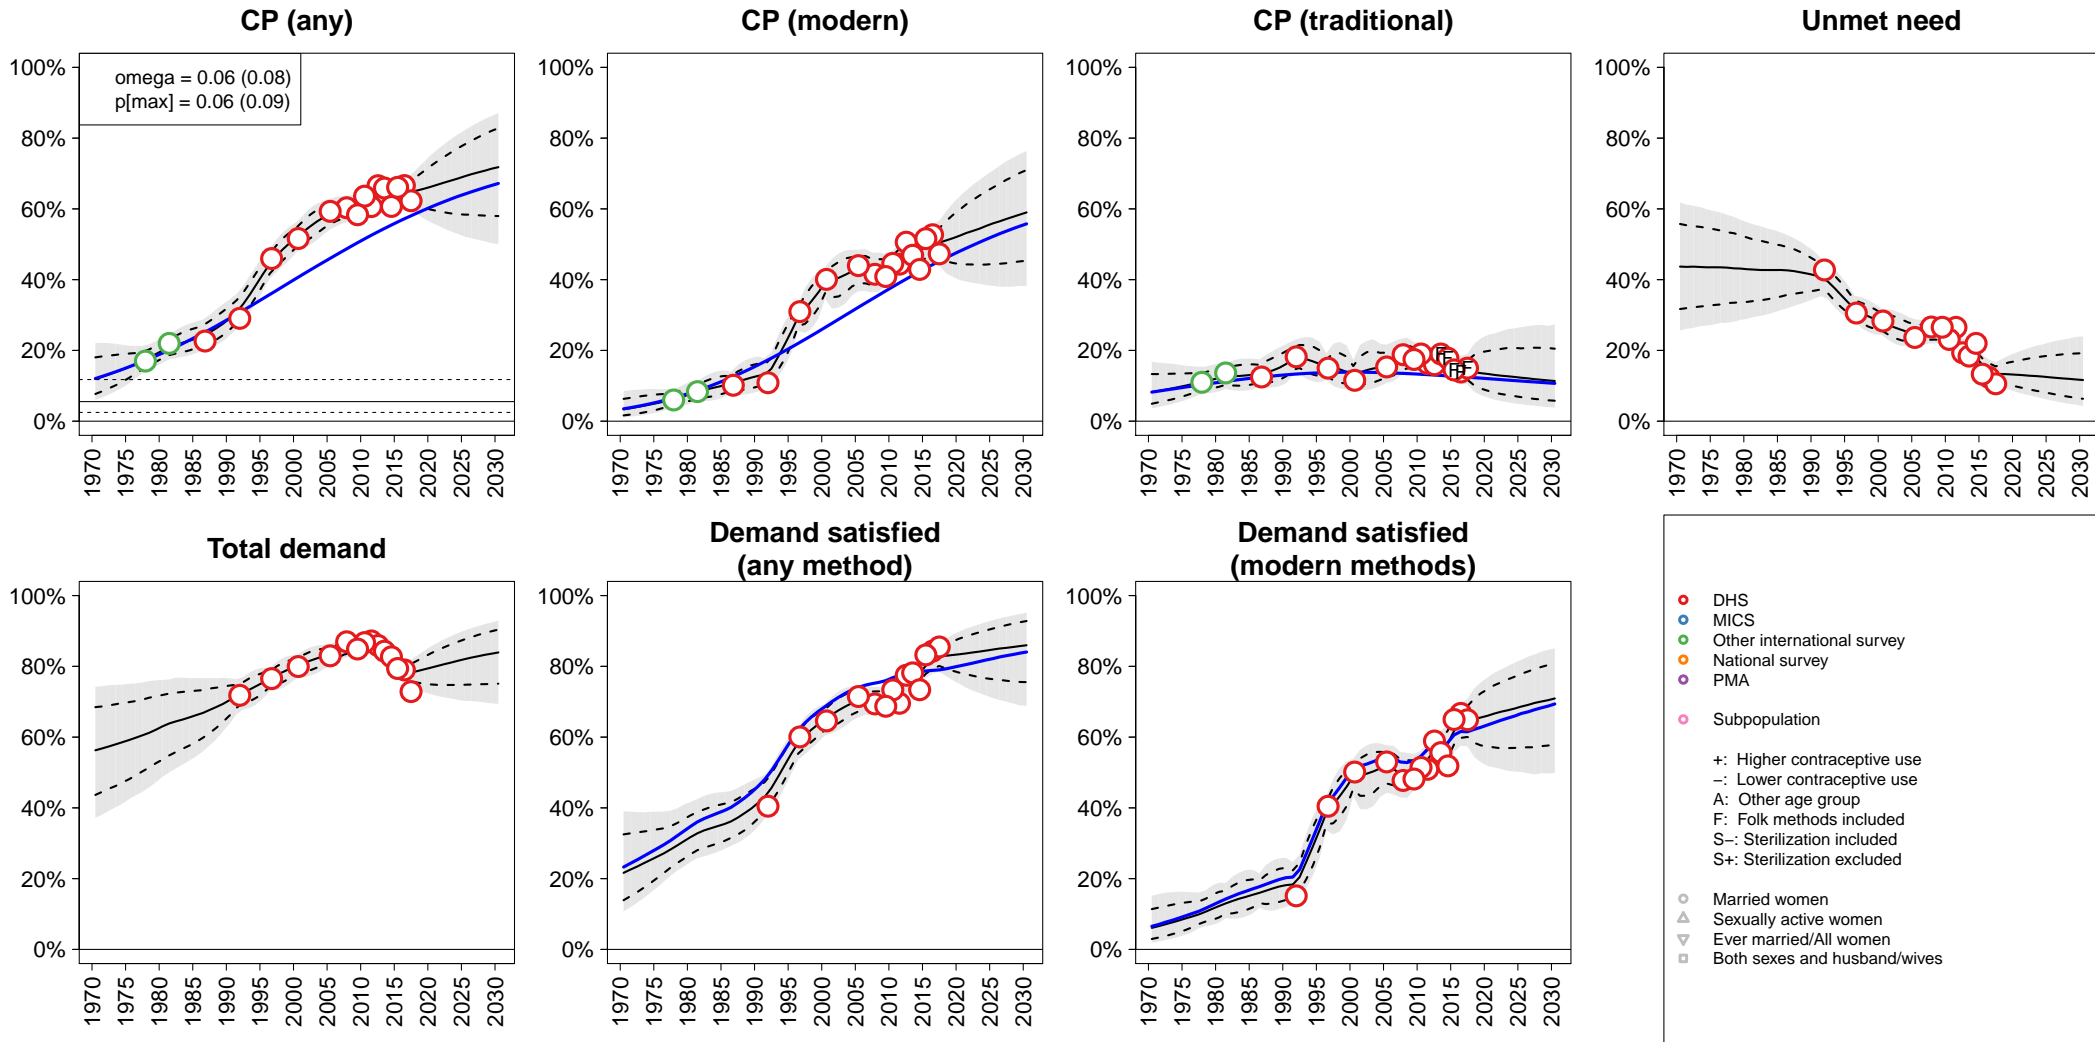

Philippines (South-eastern Asia) --- Married / In-Union

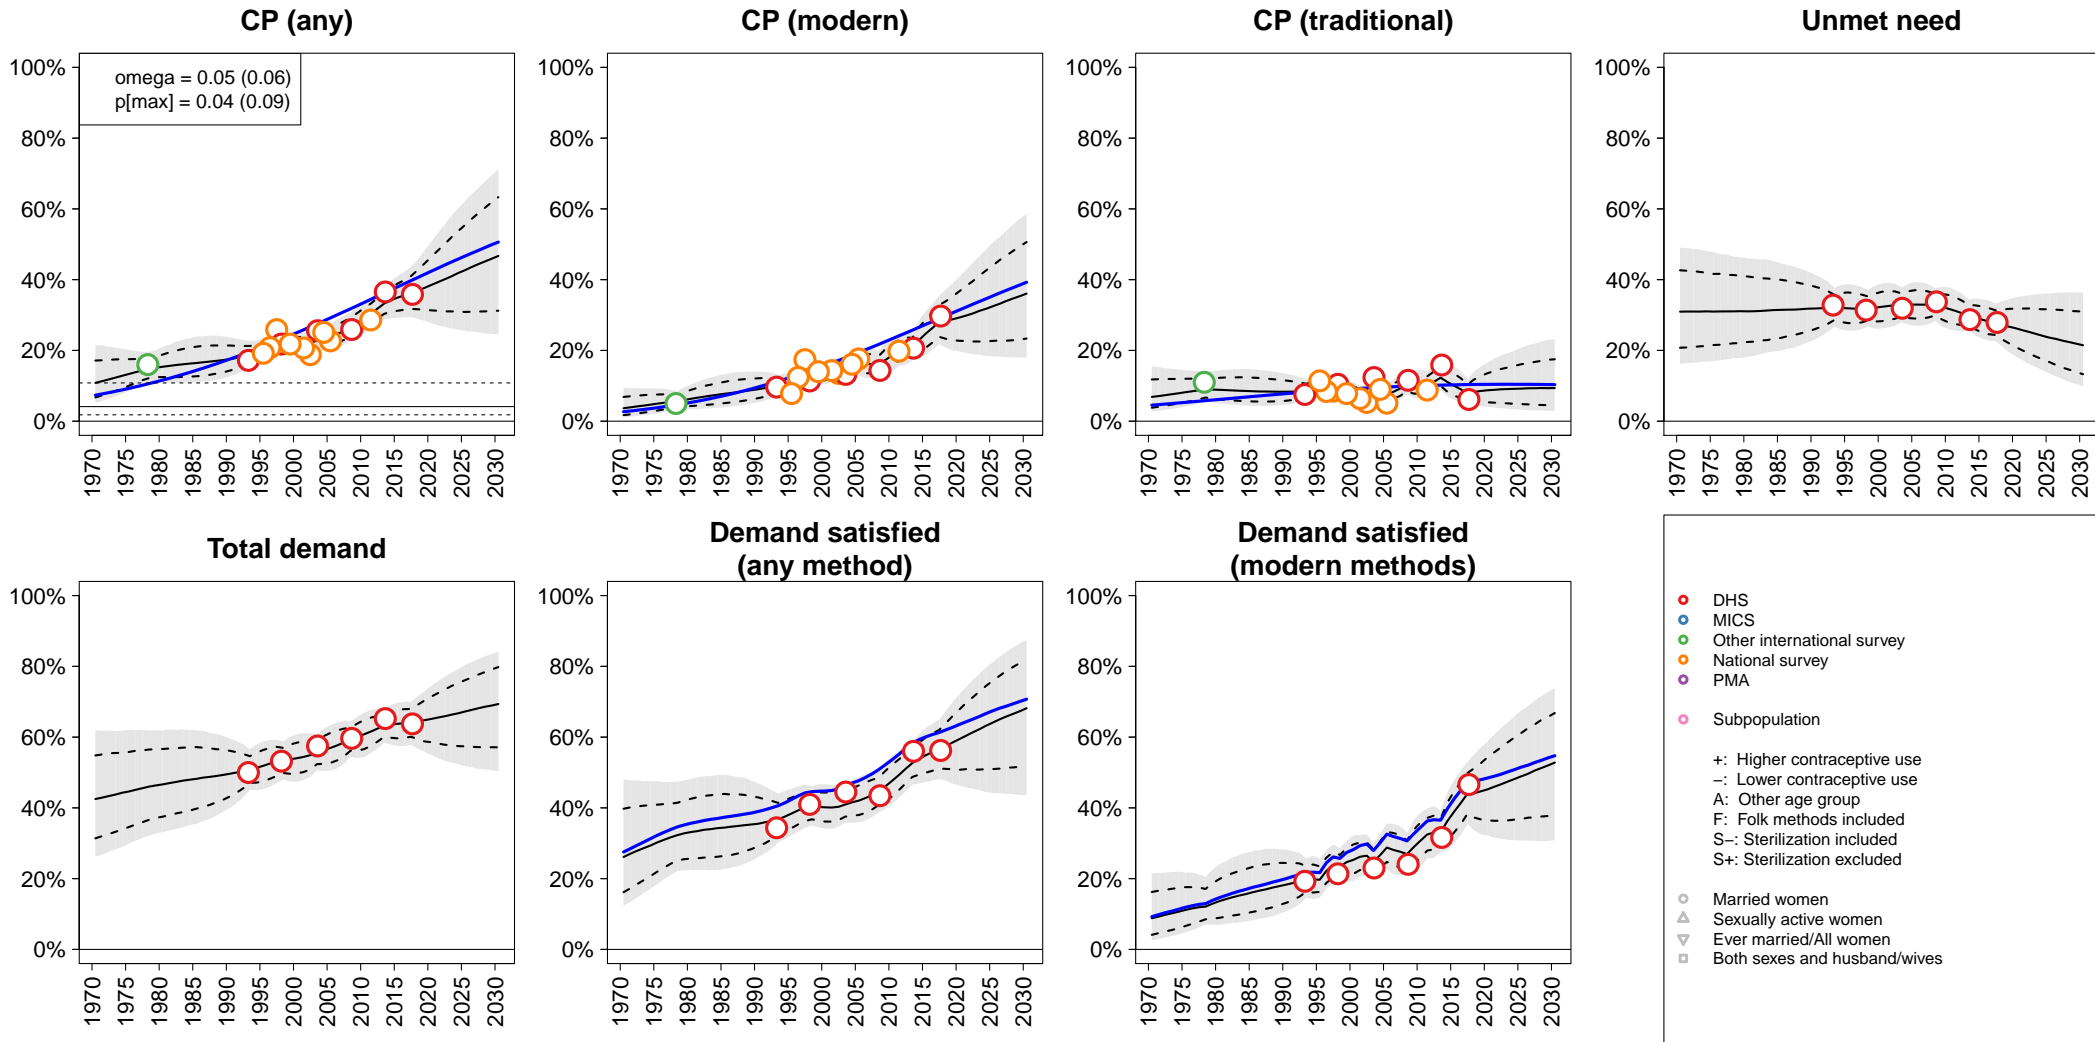

Portugal (Southern Europe) --- Married / In-Union

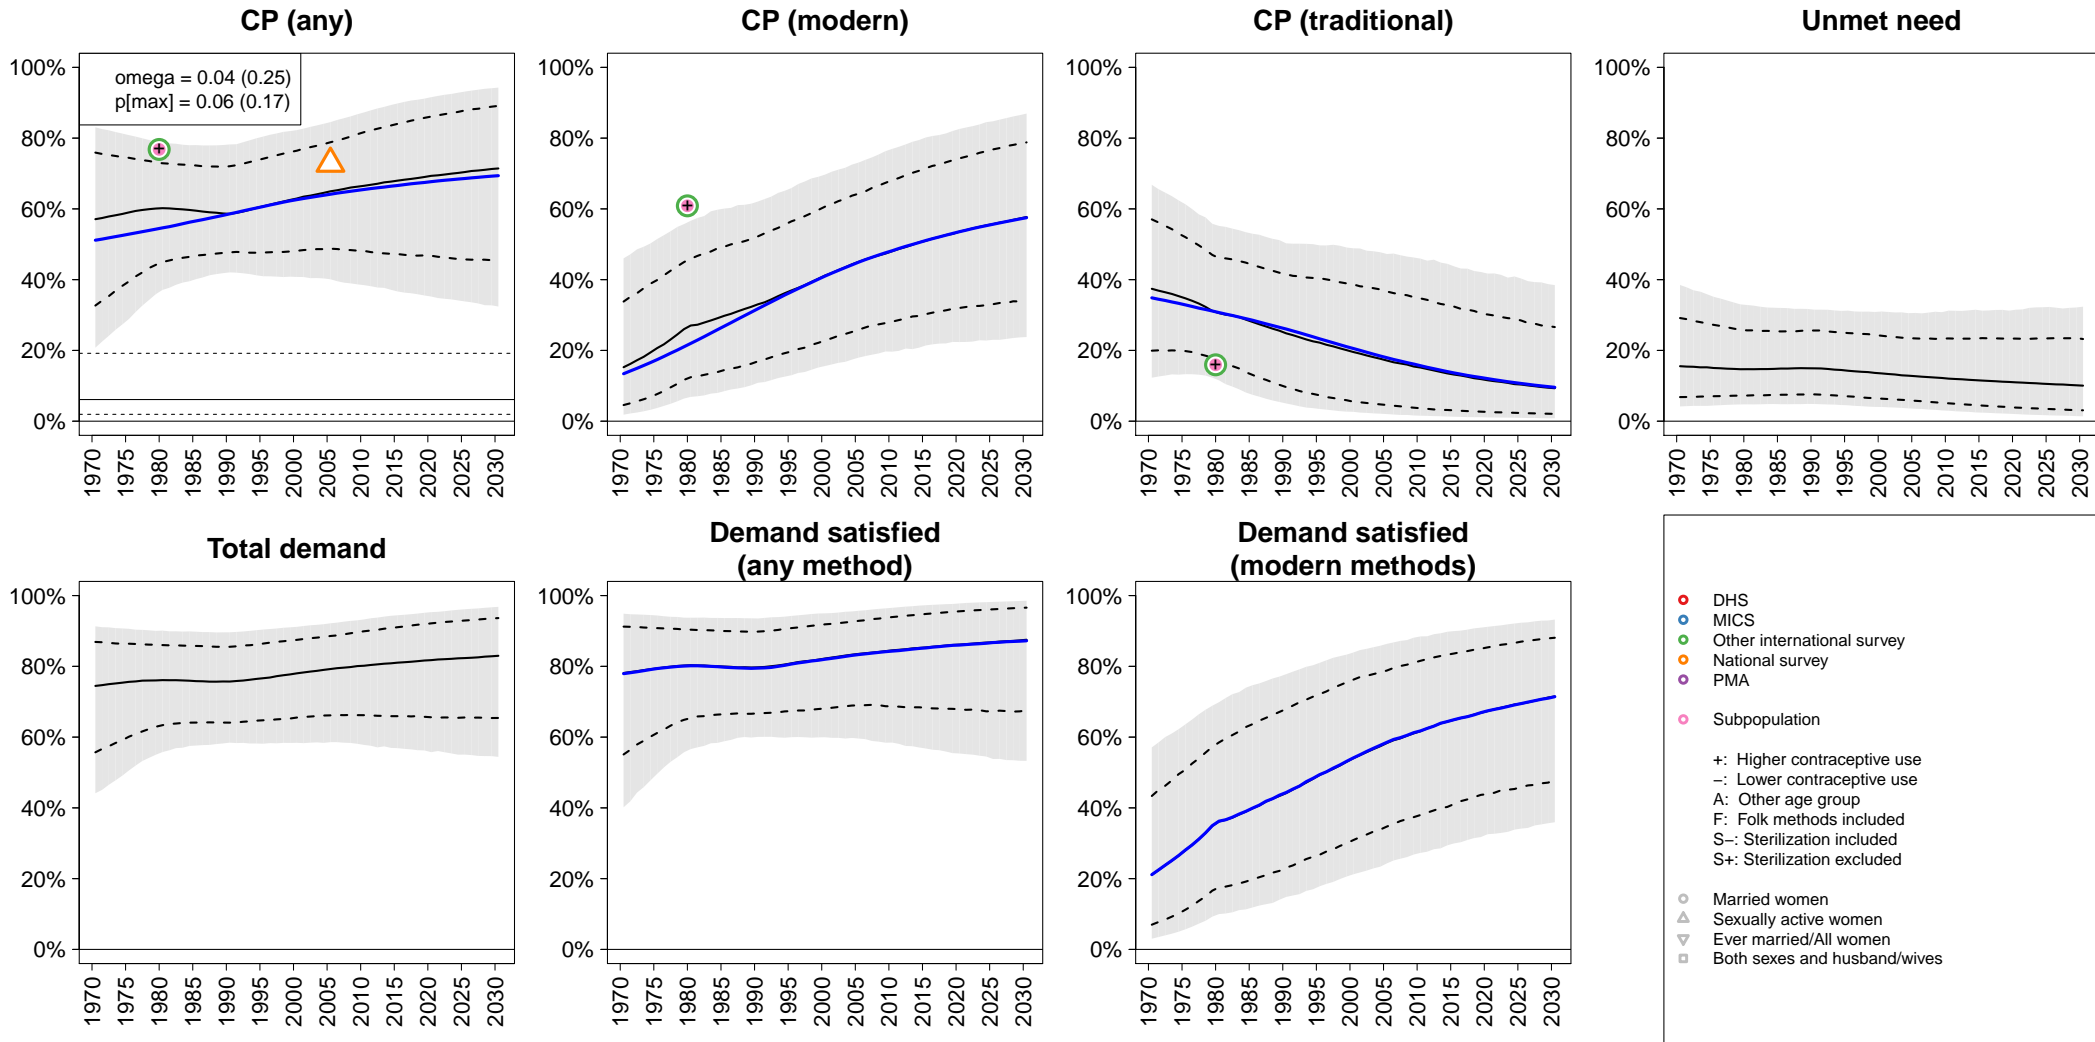

Qatar (Western Asia) --- Married / In-Union

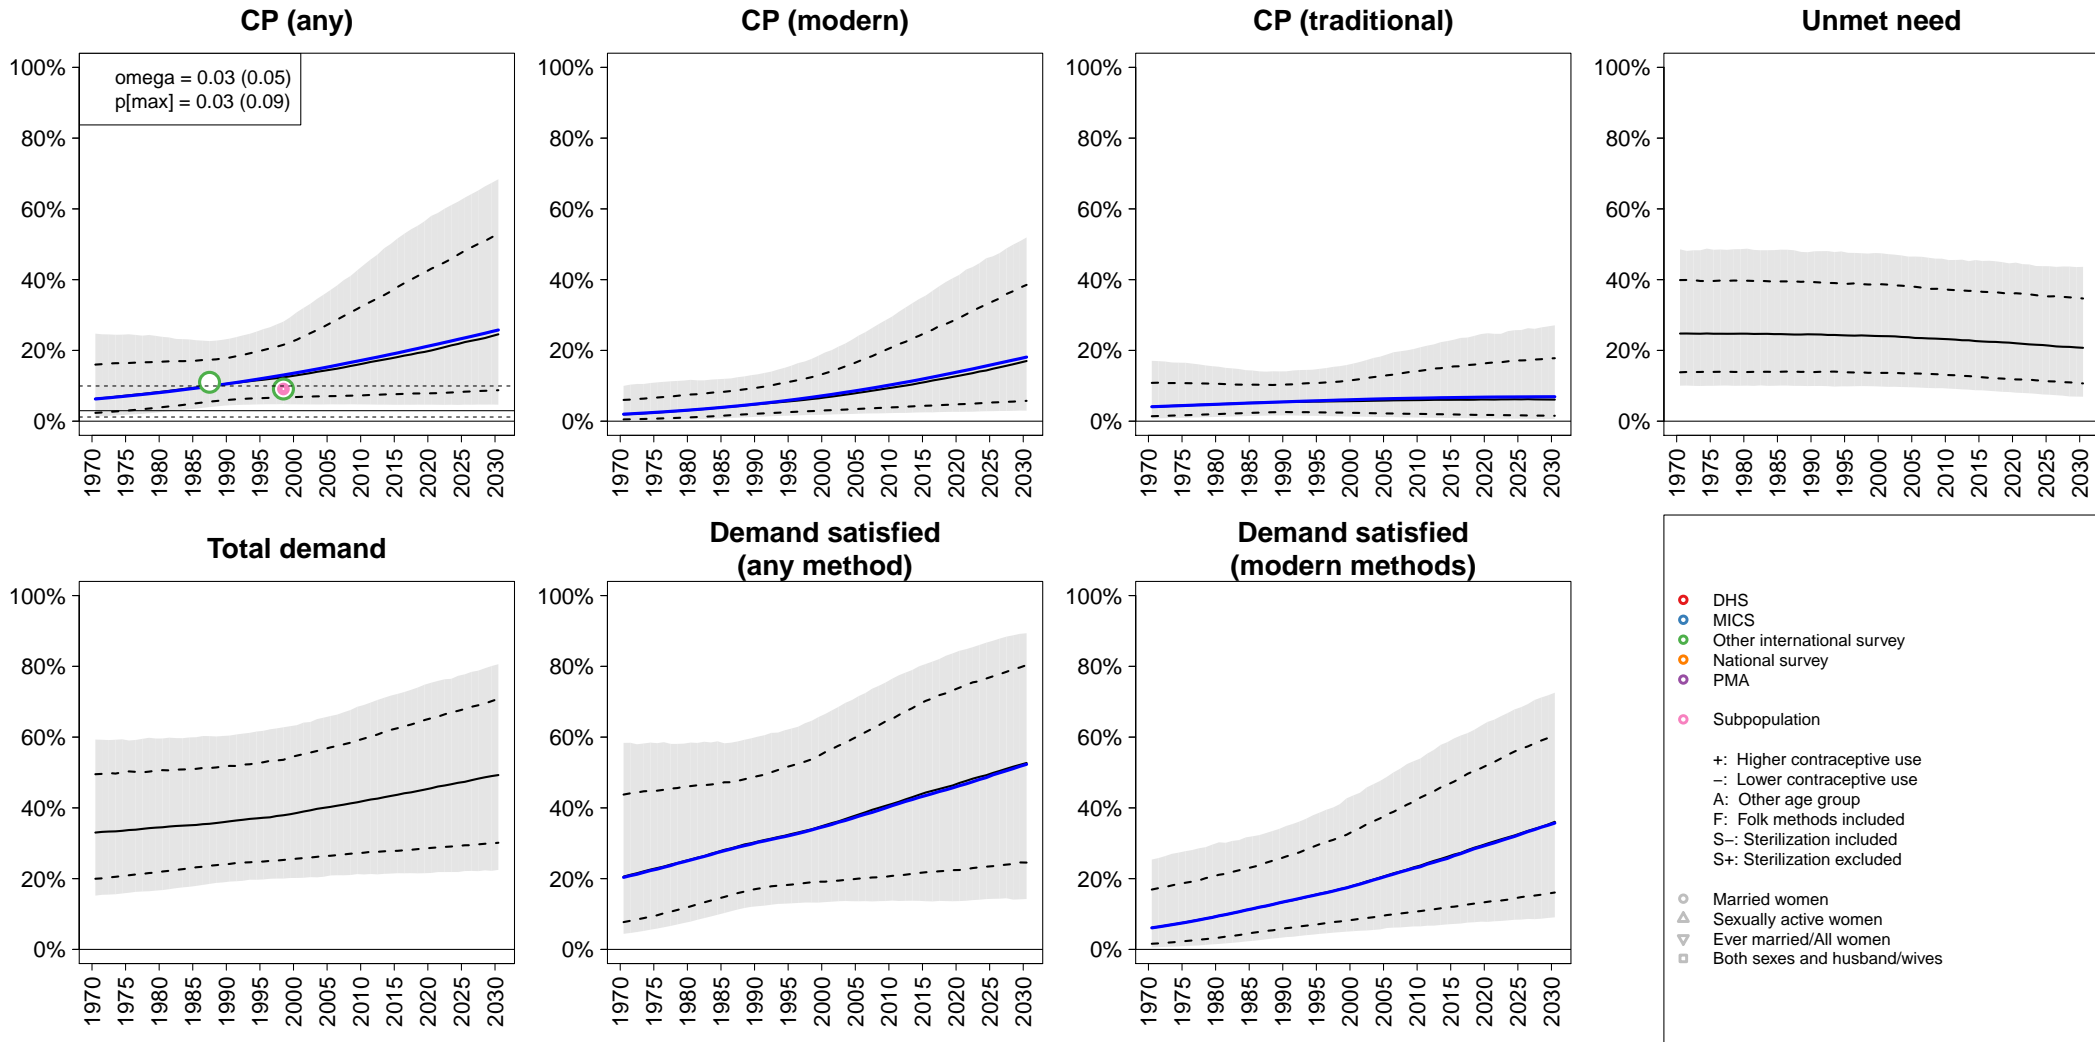

Republic of Korea (Eastern Asia) --- Married / In-Union

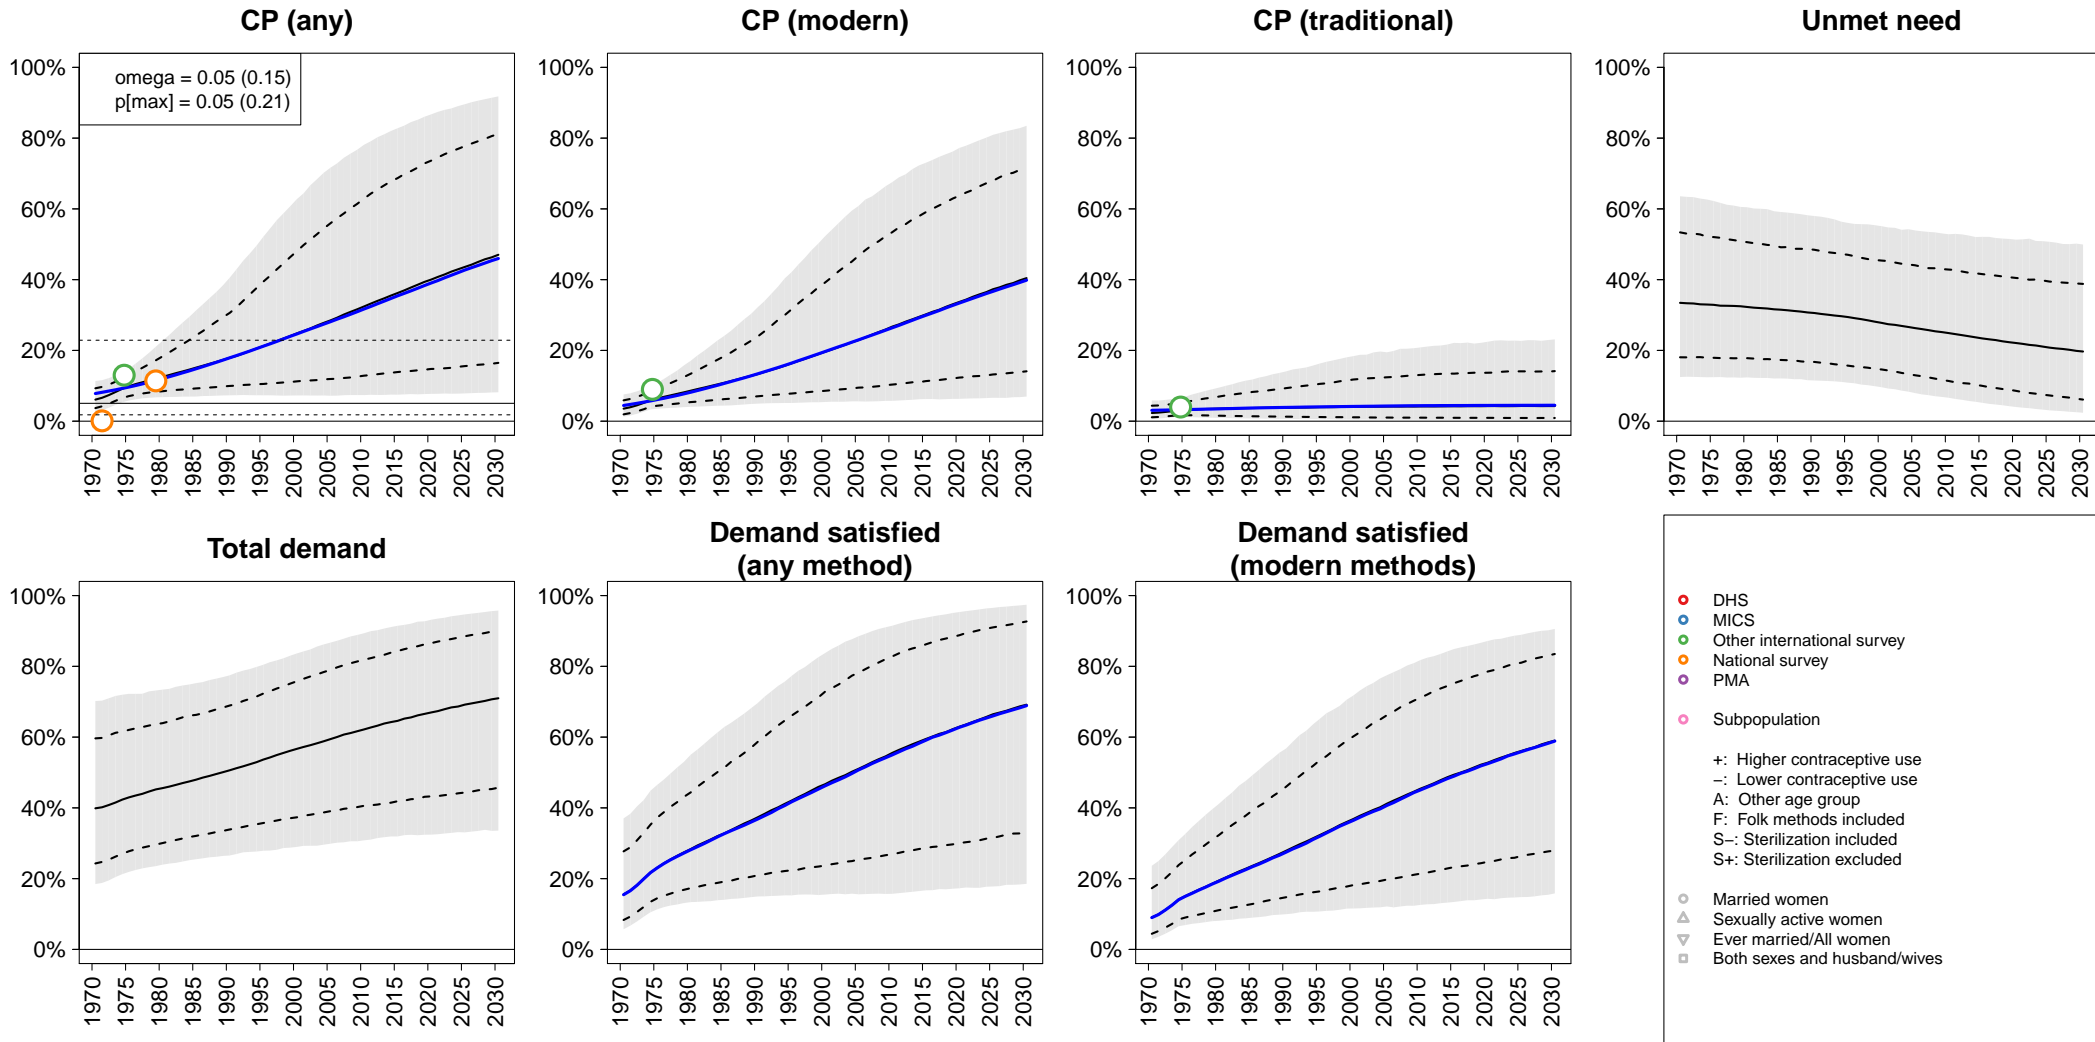

Republic of Moldova (Eastern Europe) --- Married / In-Union

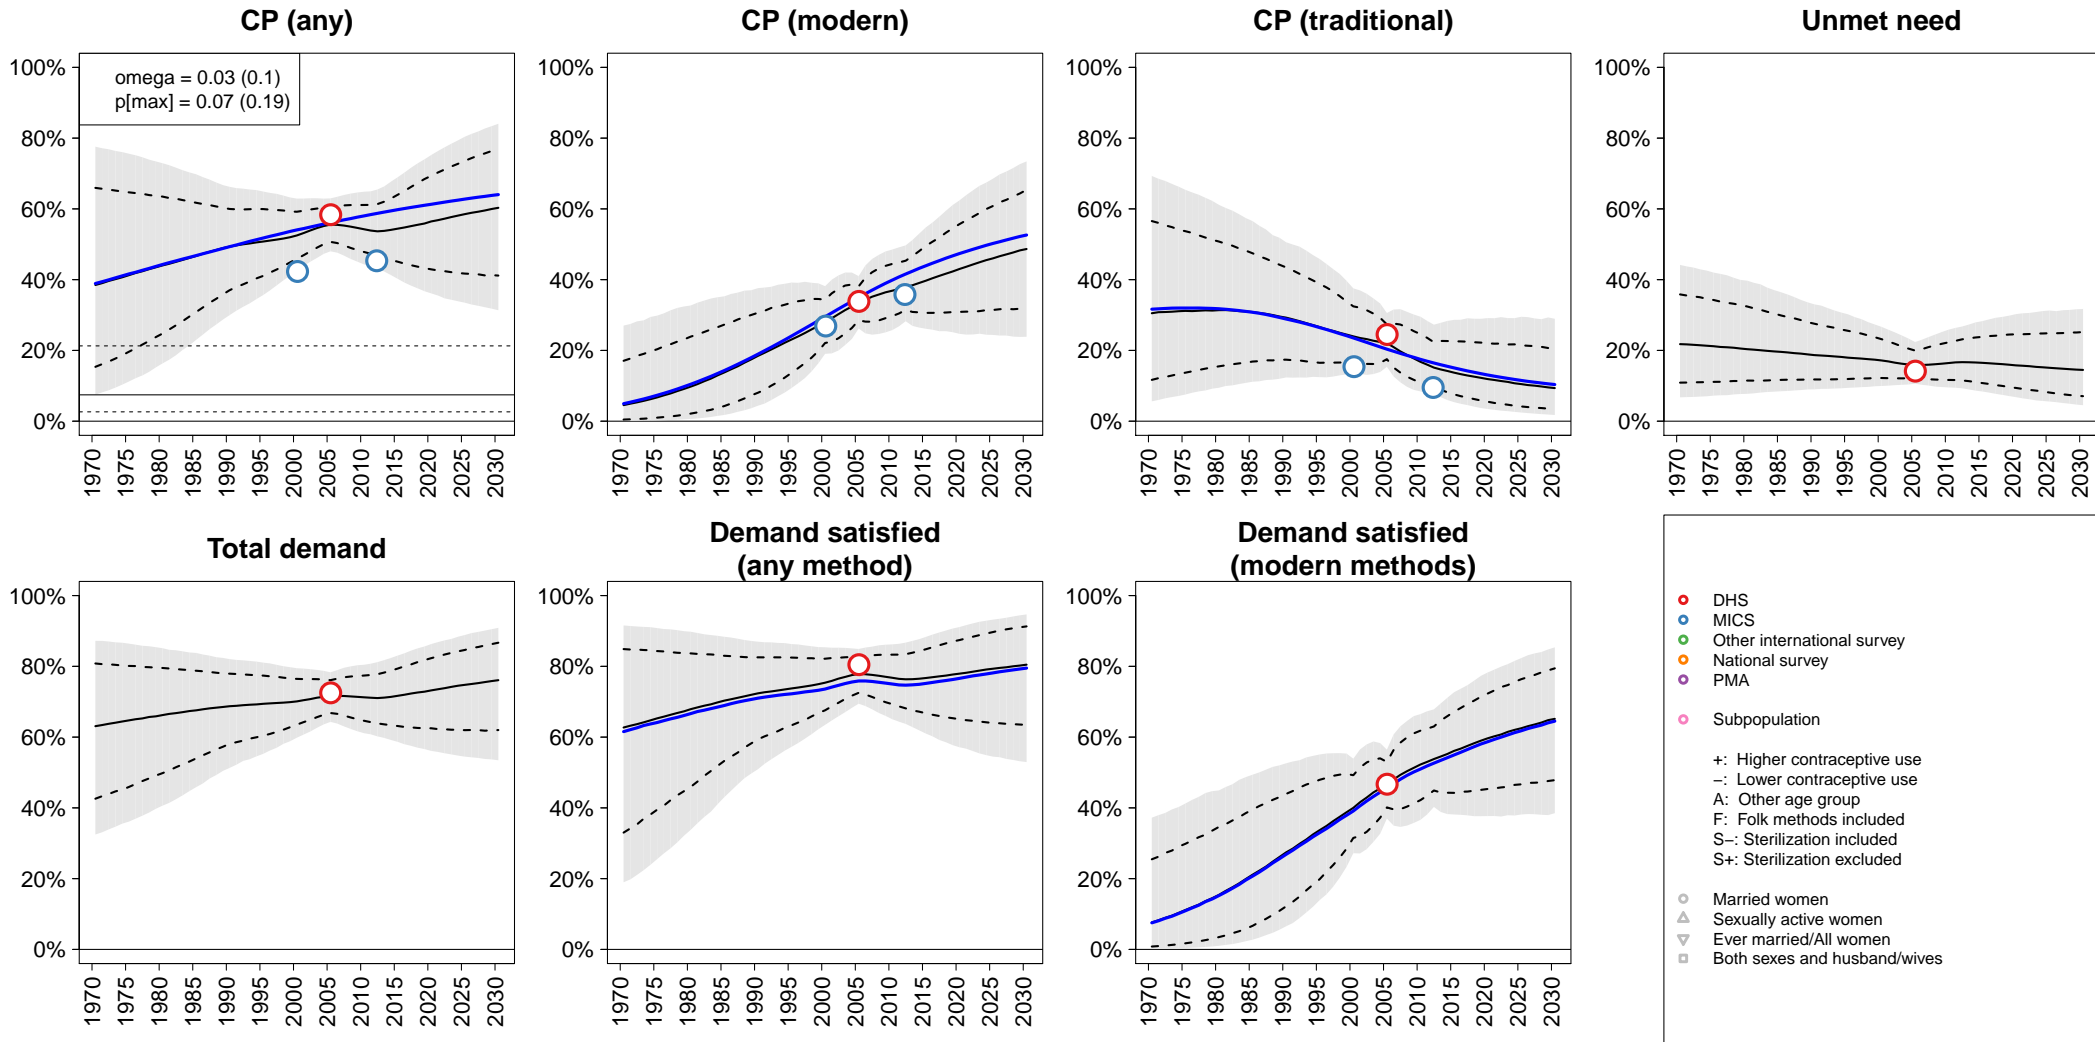

Rwanda (Eastern Africa) --- Married / In-Union

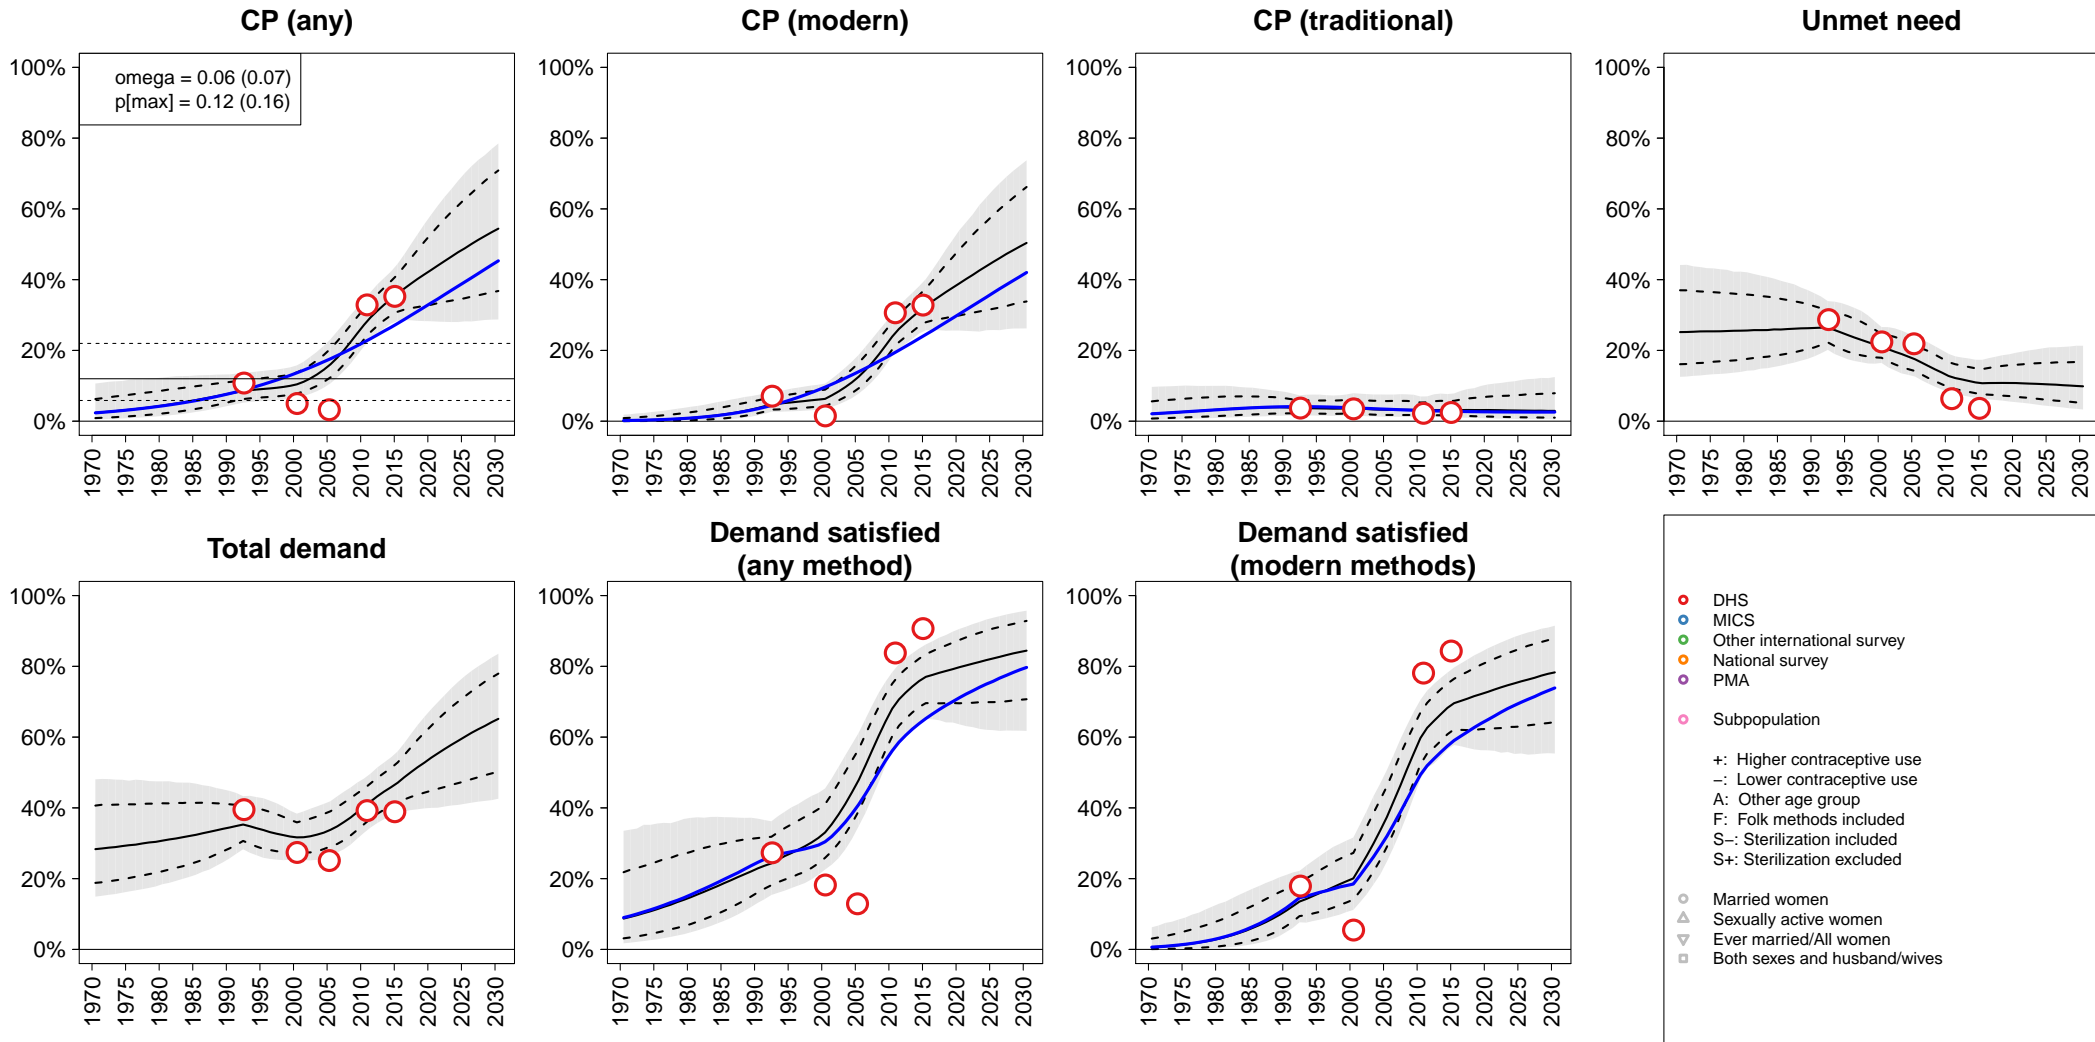

### Samoa (Polynesia) --- Married / In-Union

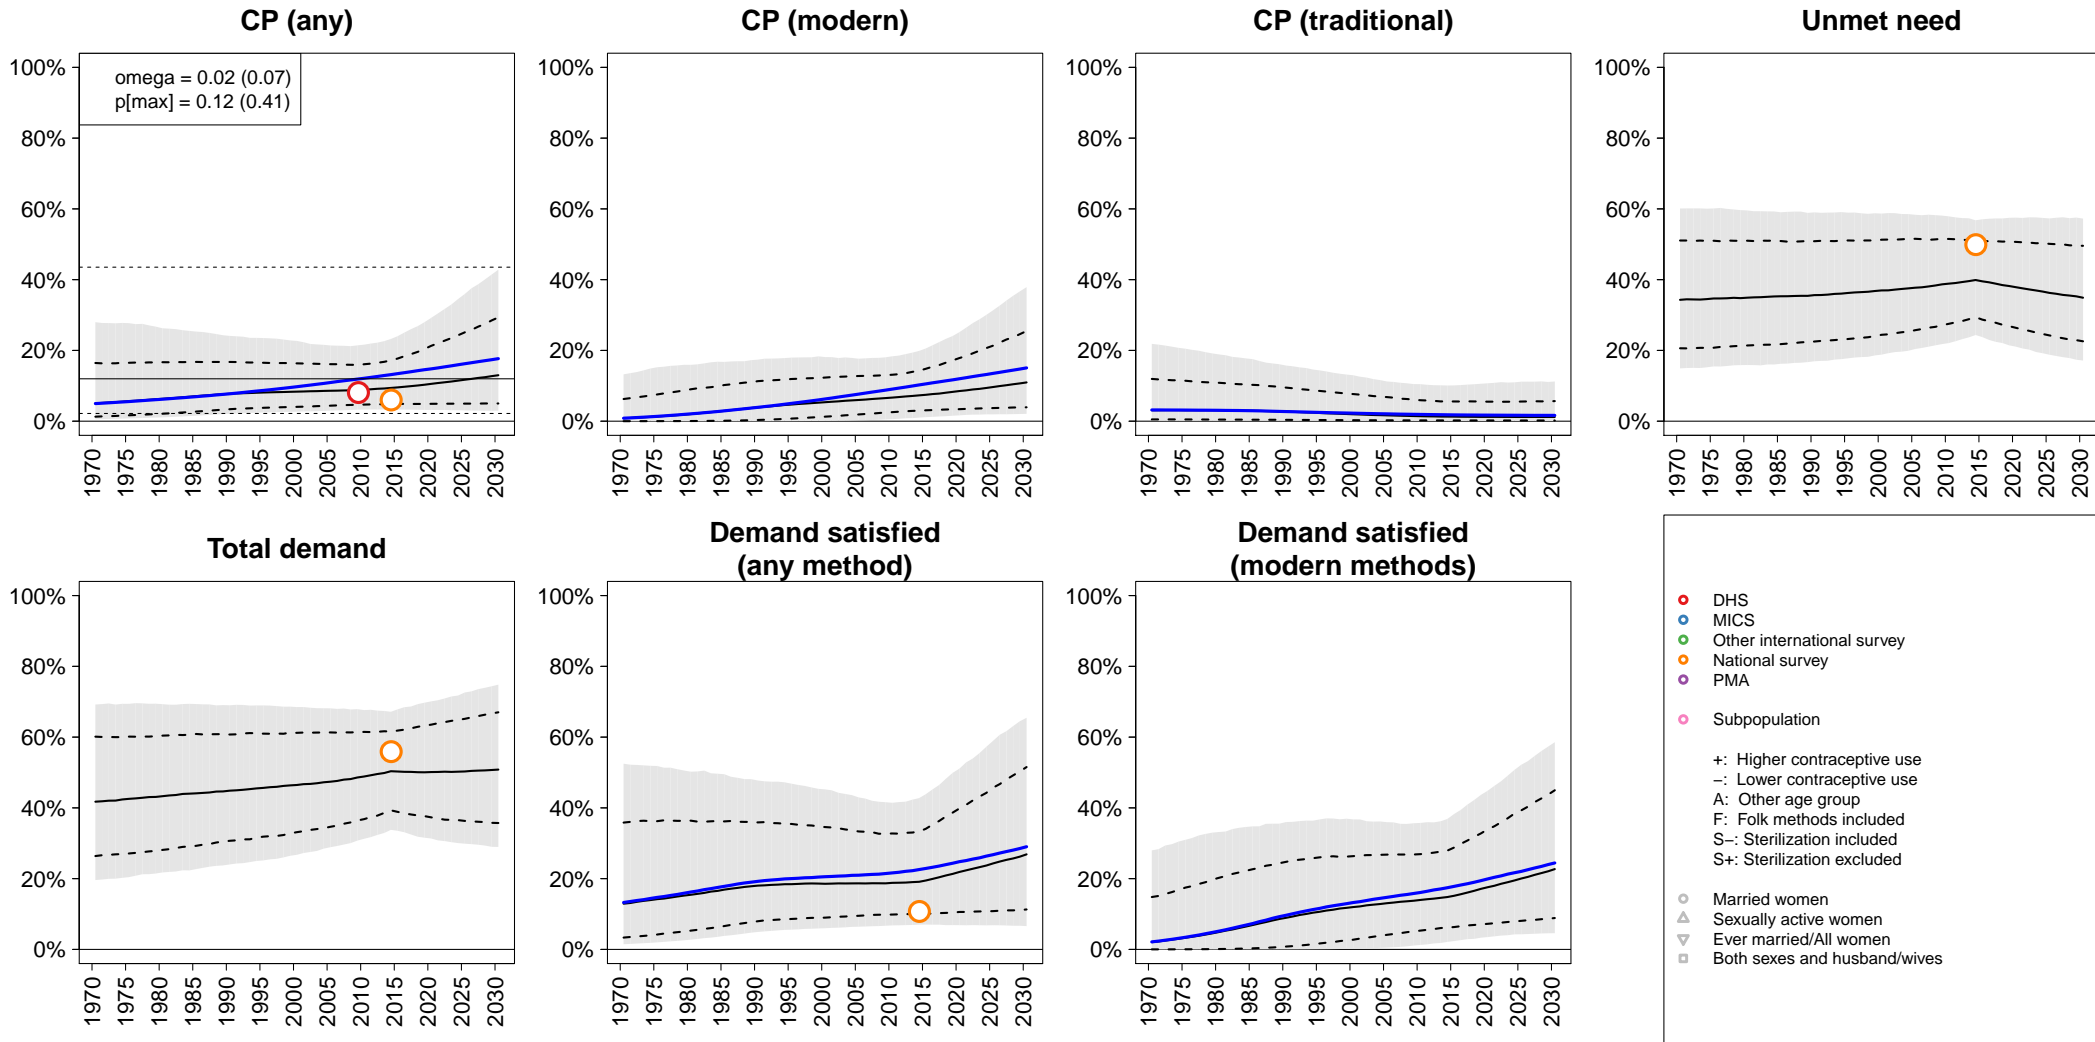



Sao Tome and Principe (Middle Africa) --- Married / In-Union

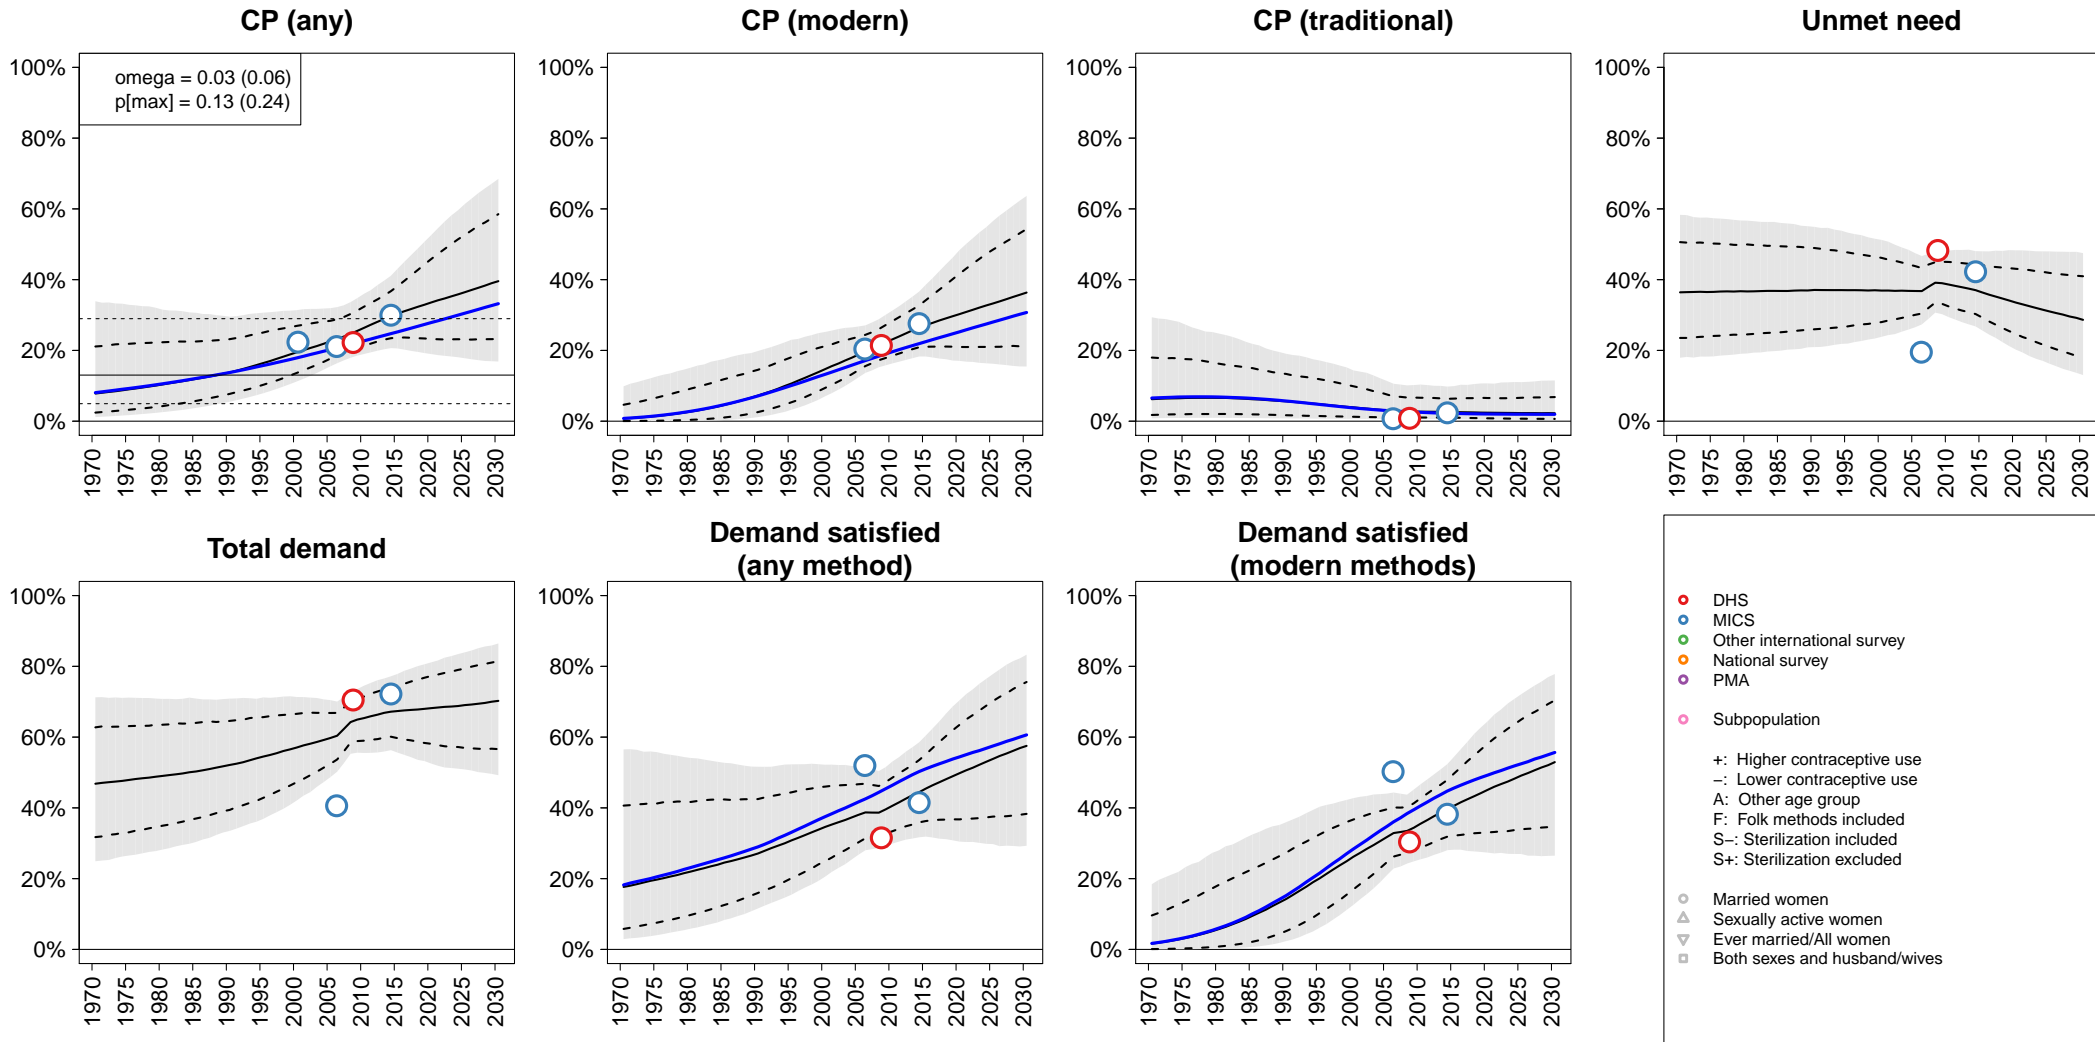

Saudi Arabia (Western Asia) --- Married / In-Union

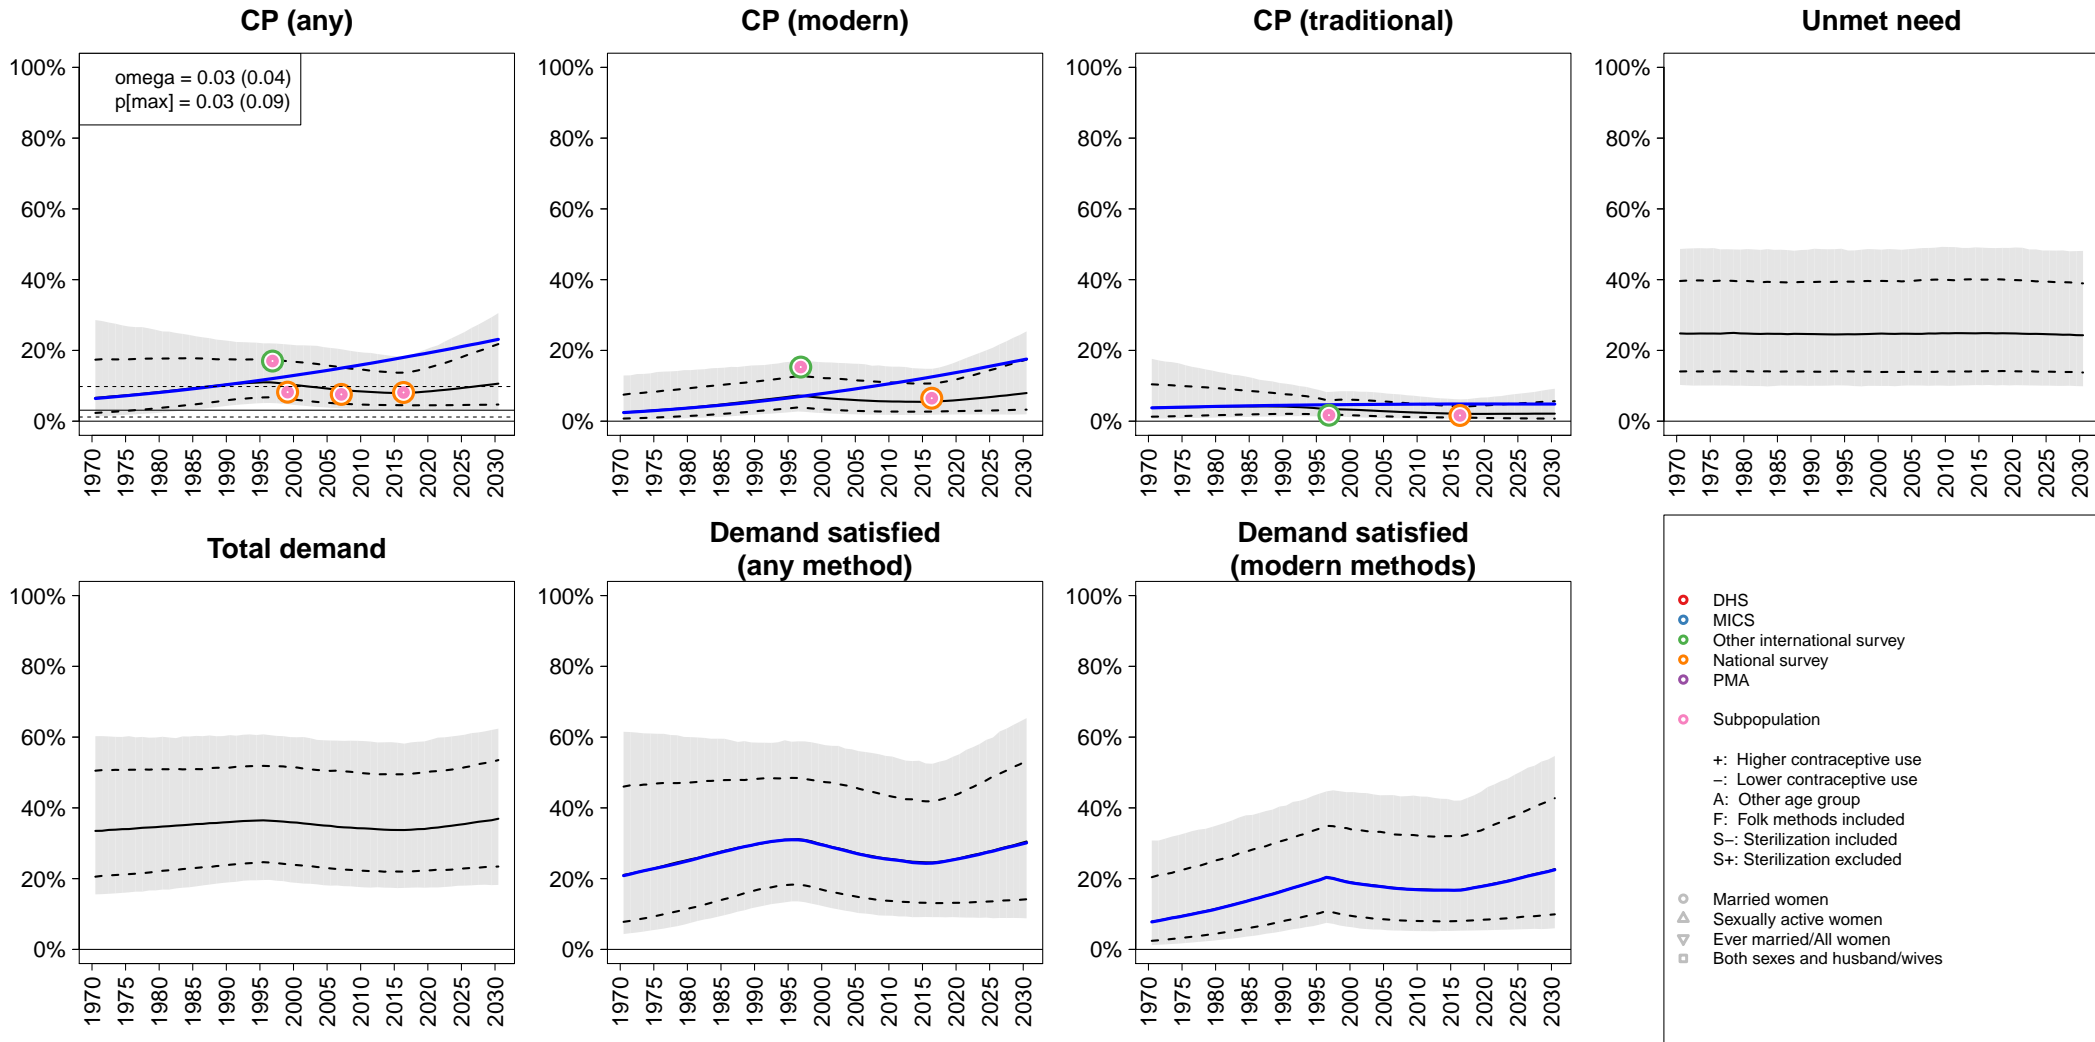

Senegal (Western Africa) --- Married / In-Union

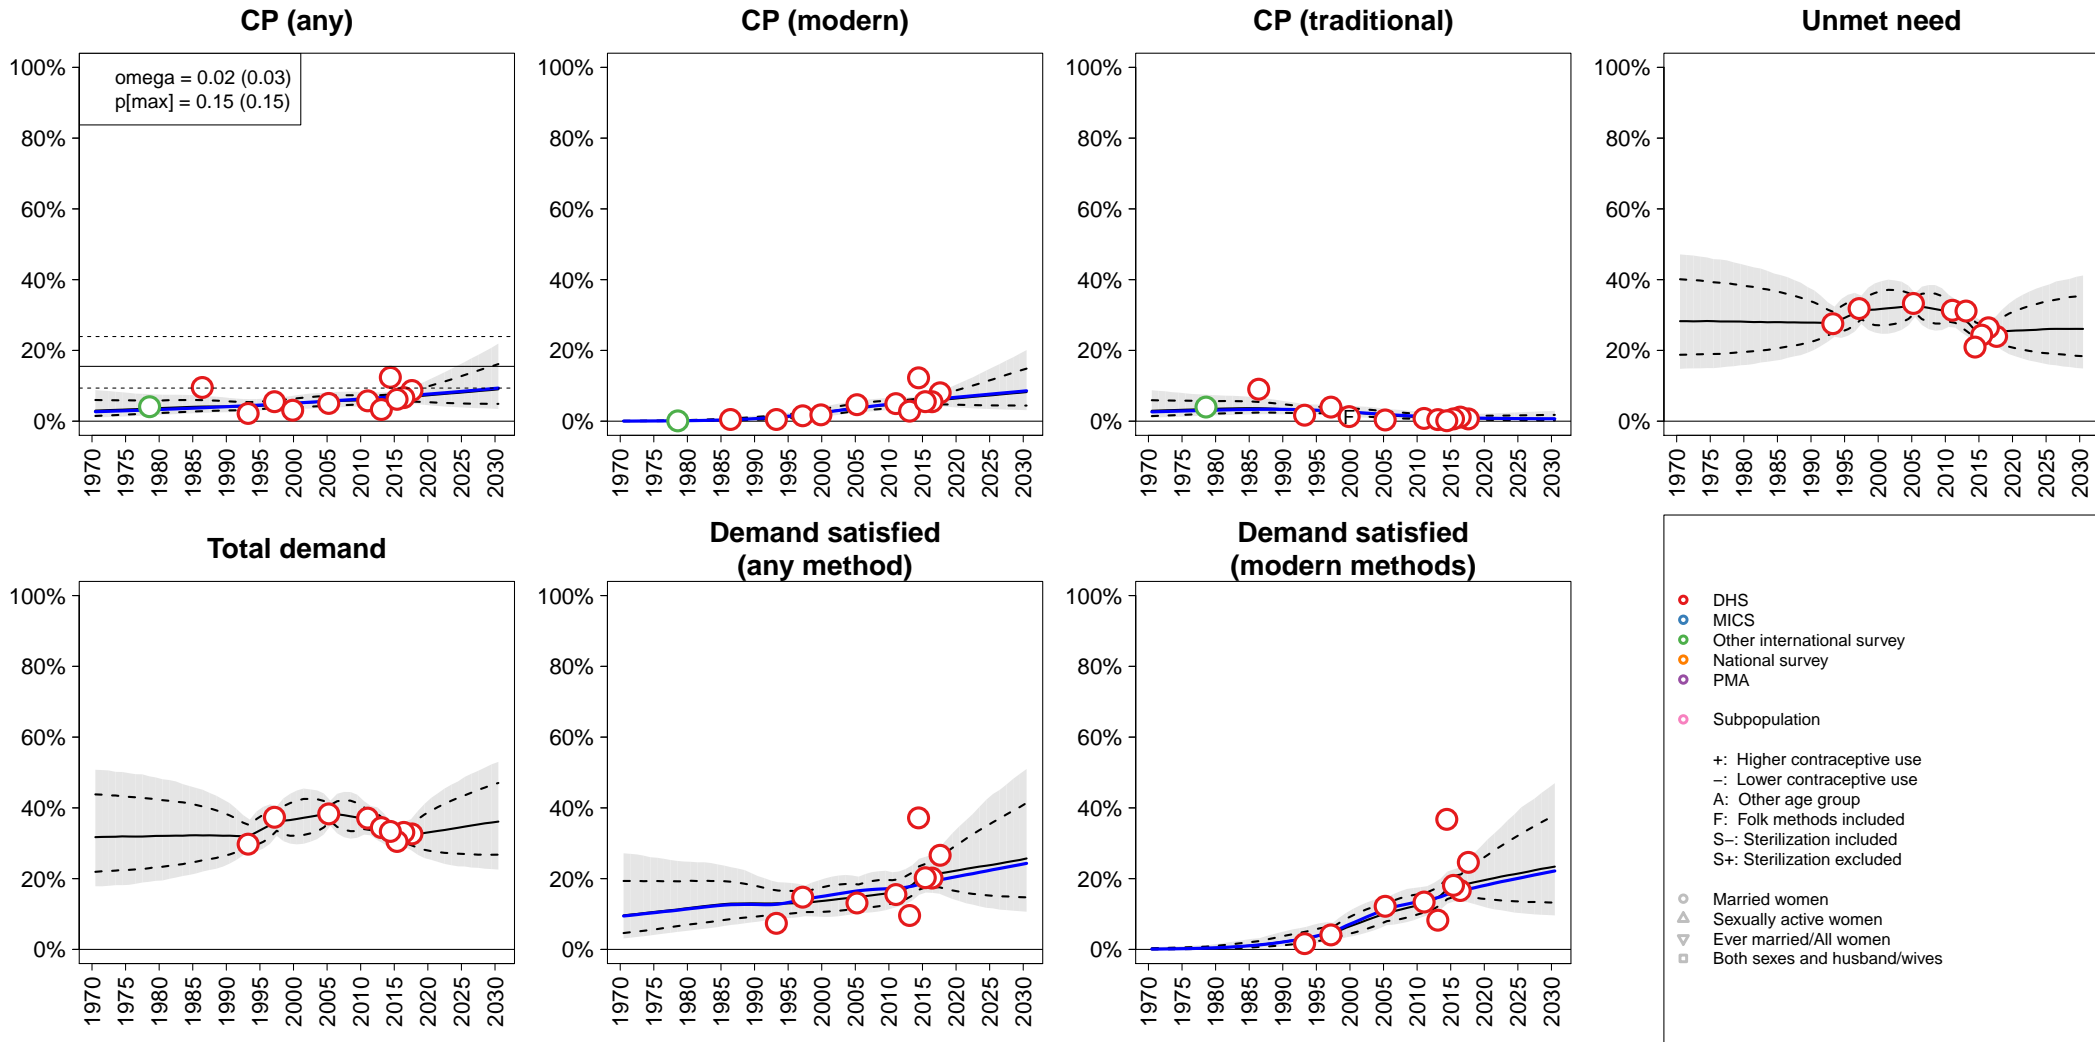

### Sierra Leone (Western Africa) --- Married / In-Union

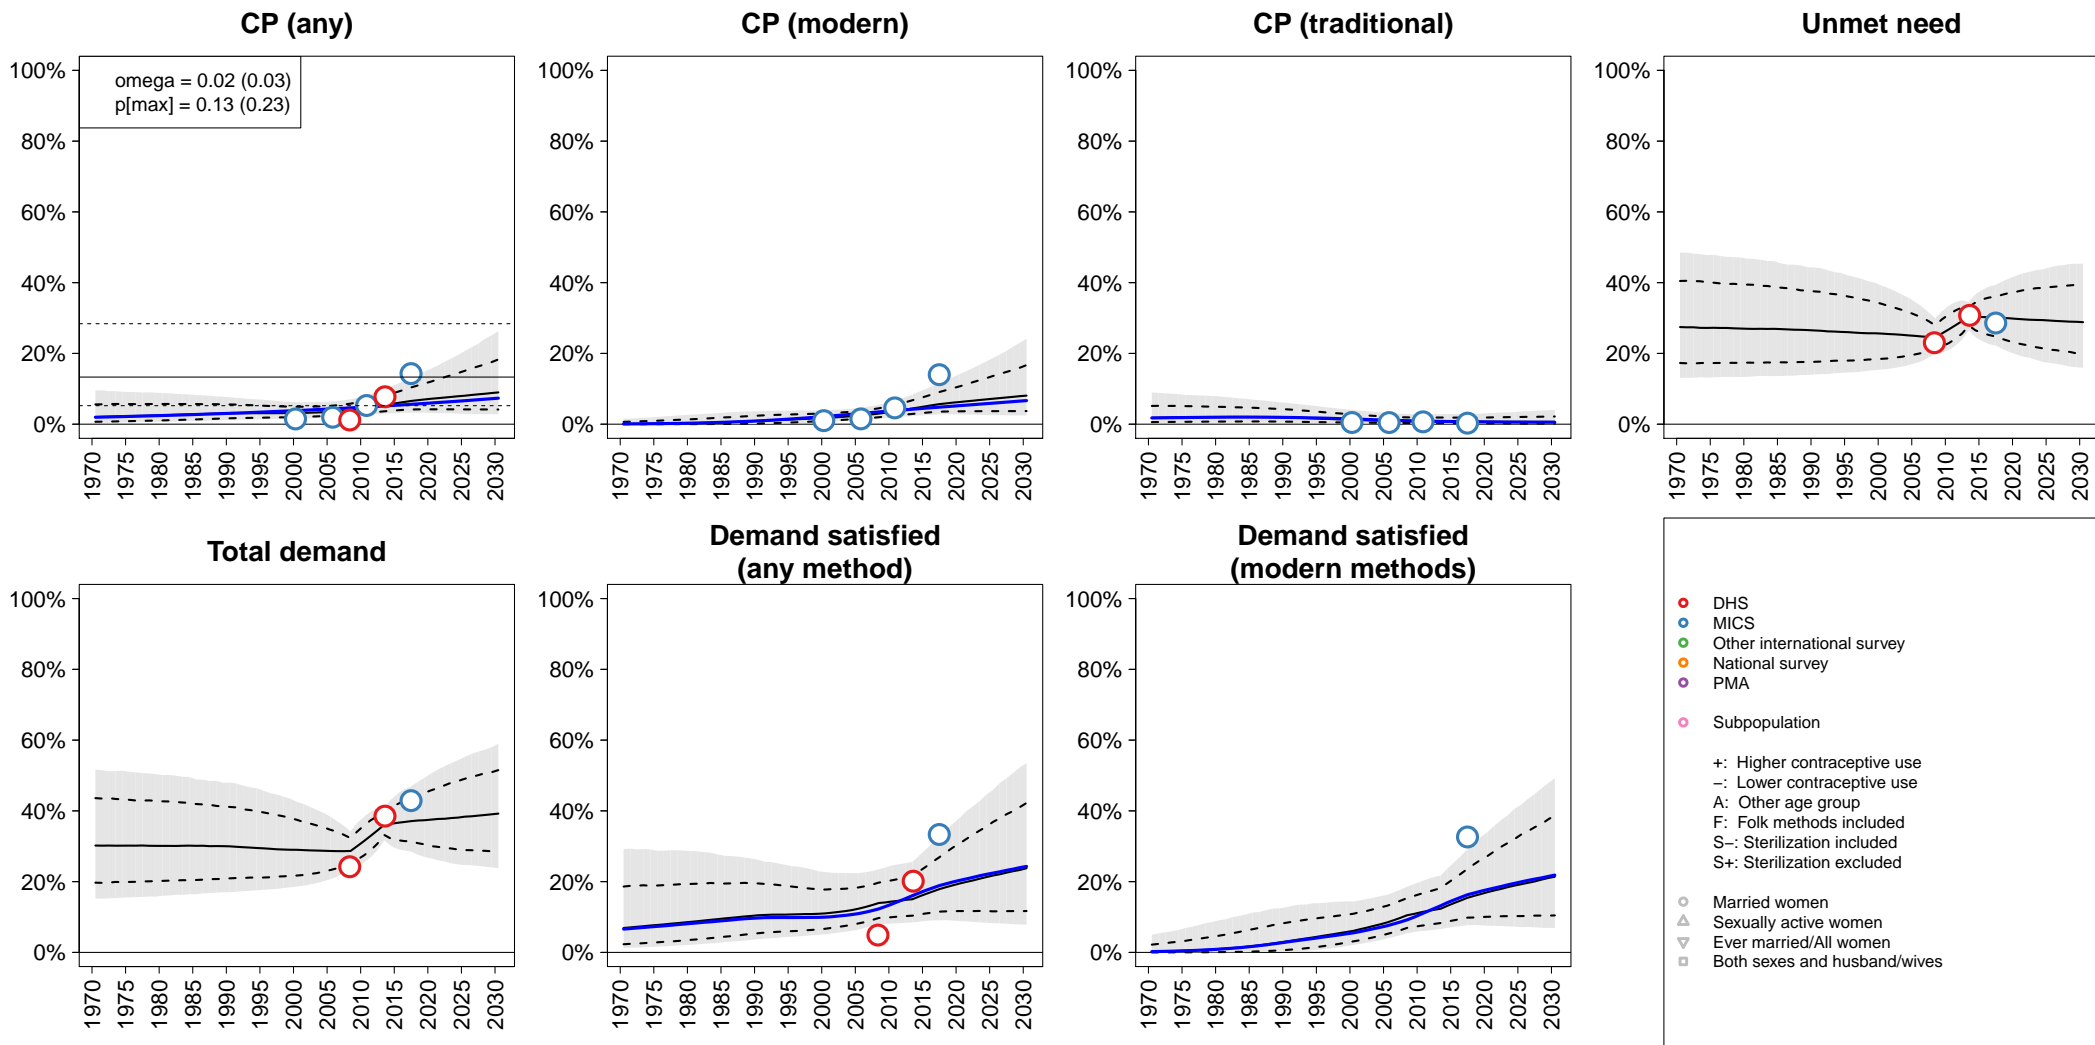

Solomon Islands (Melanesia) --- Married / In-Union

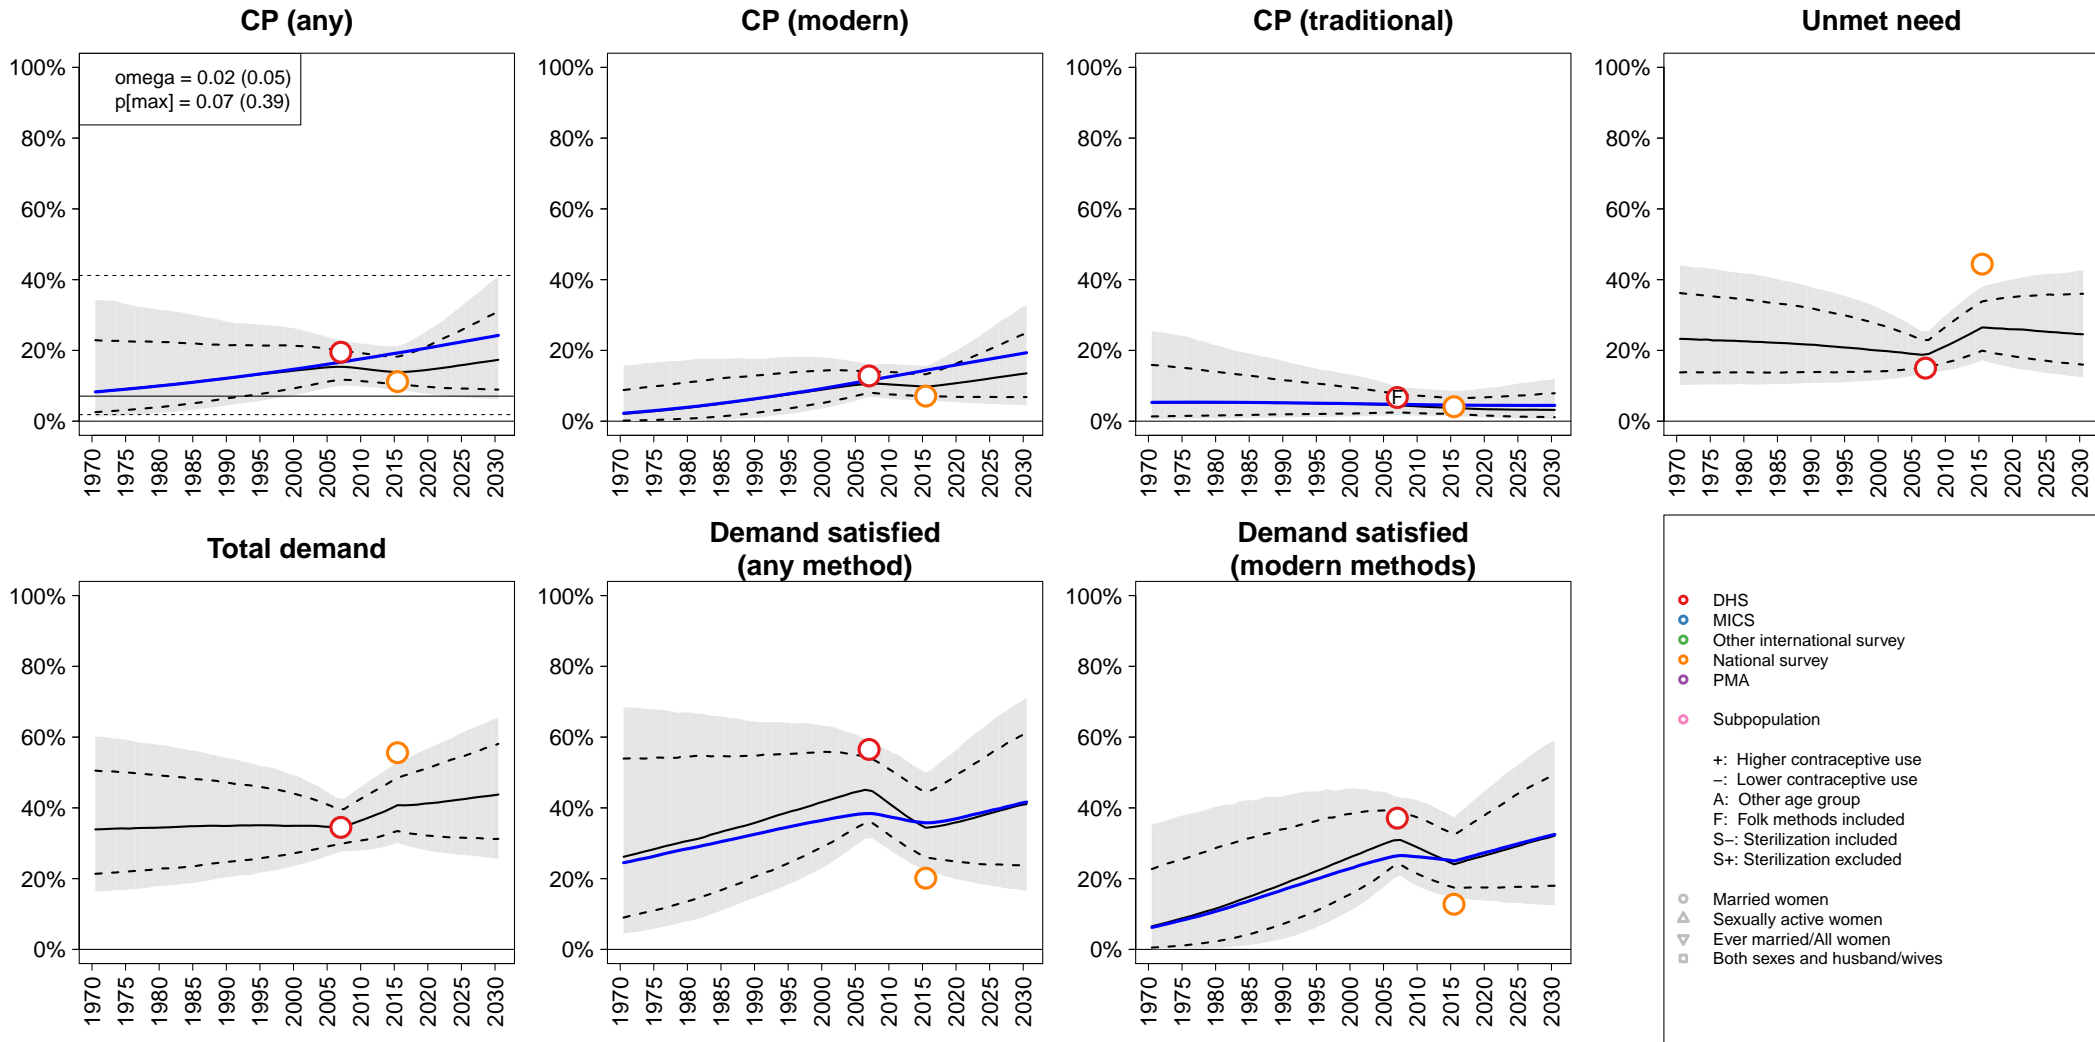

Somalia (Eastern Africa) --- Married / In-Union

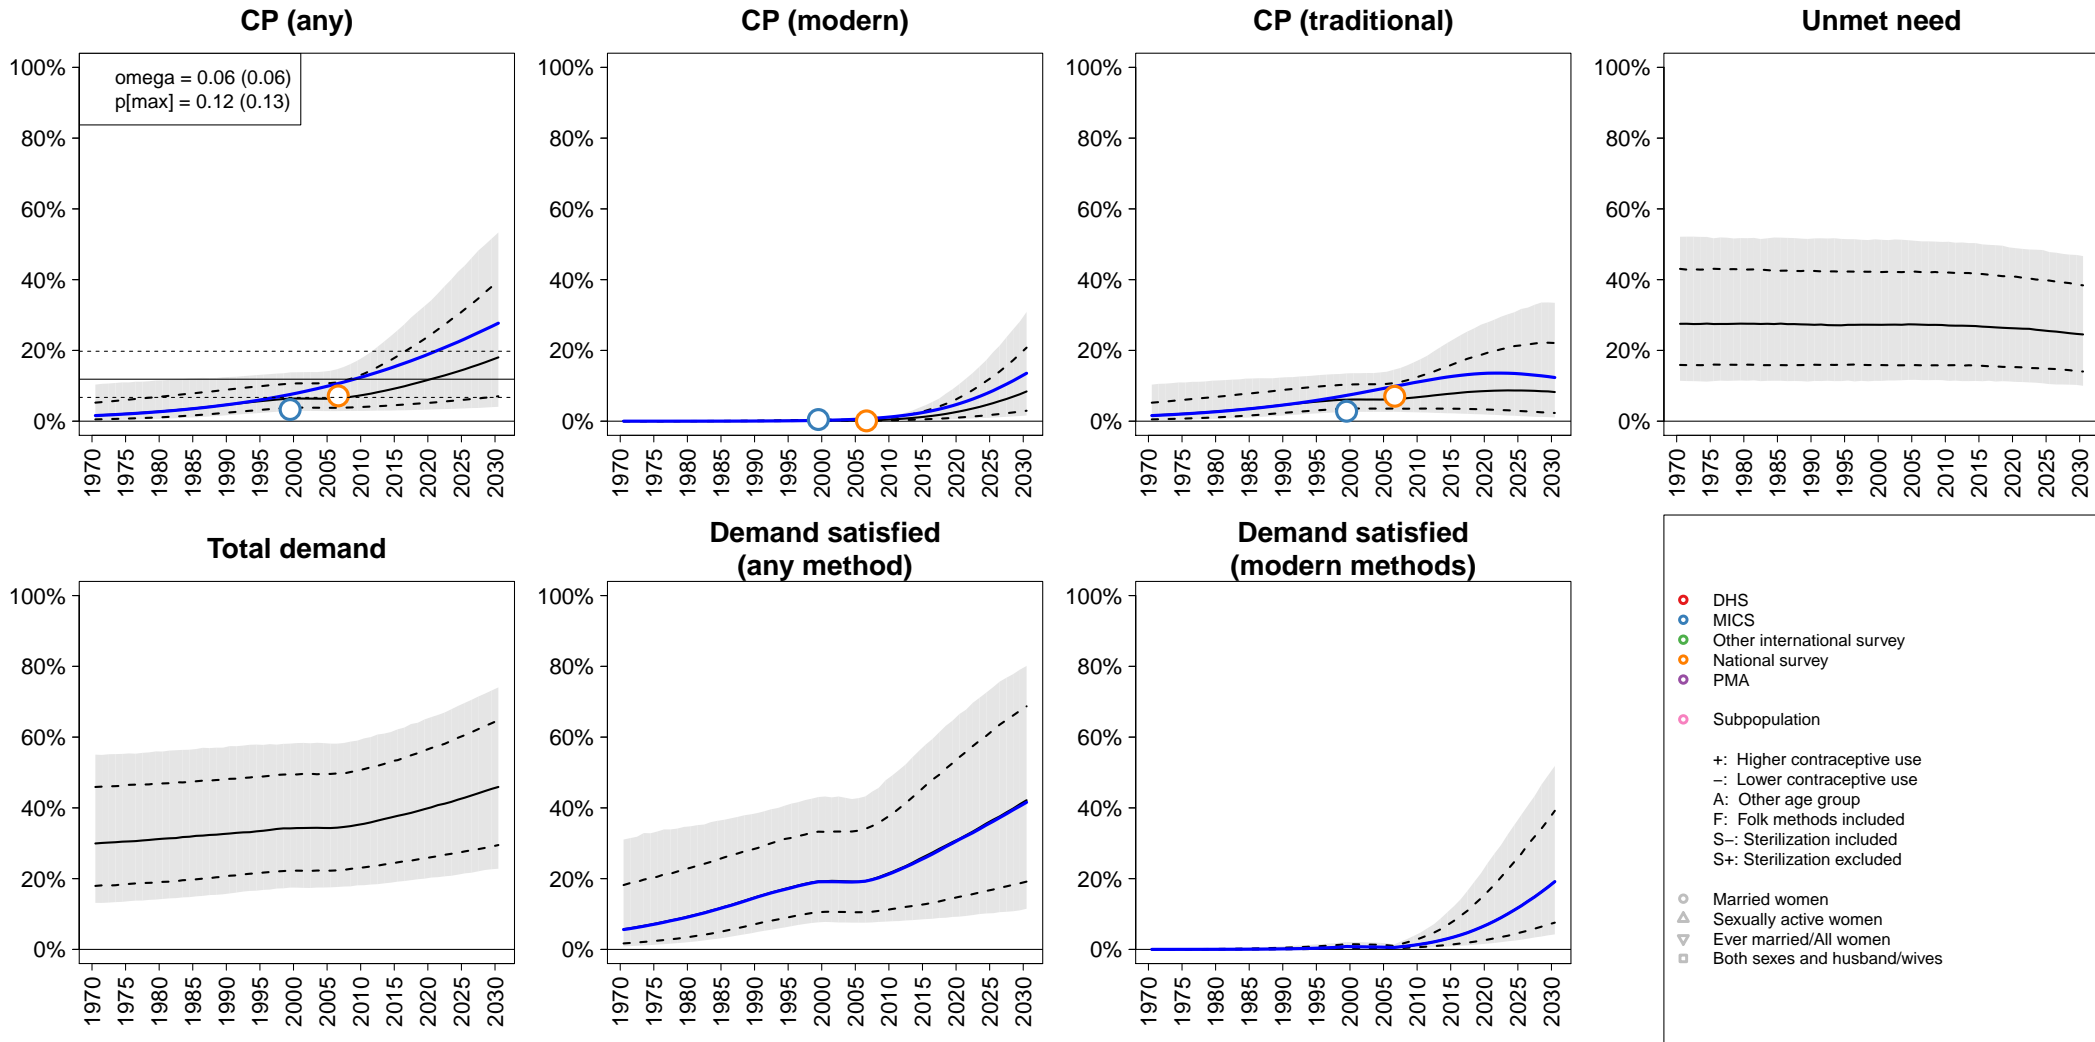

South Africa (Southern Africa) --- Married / In-Union

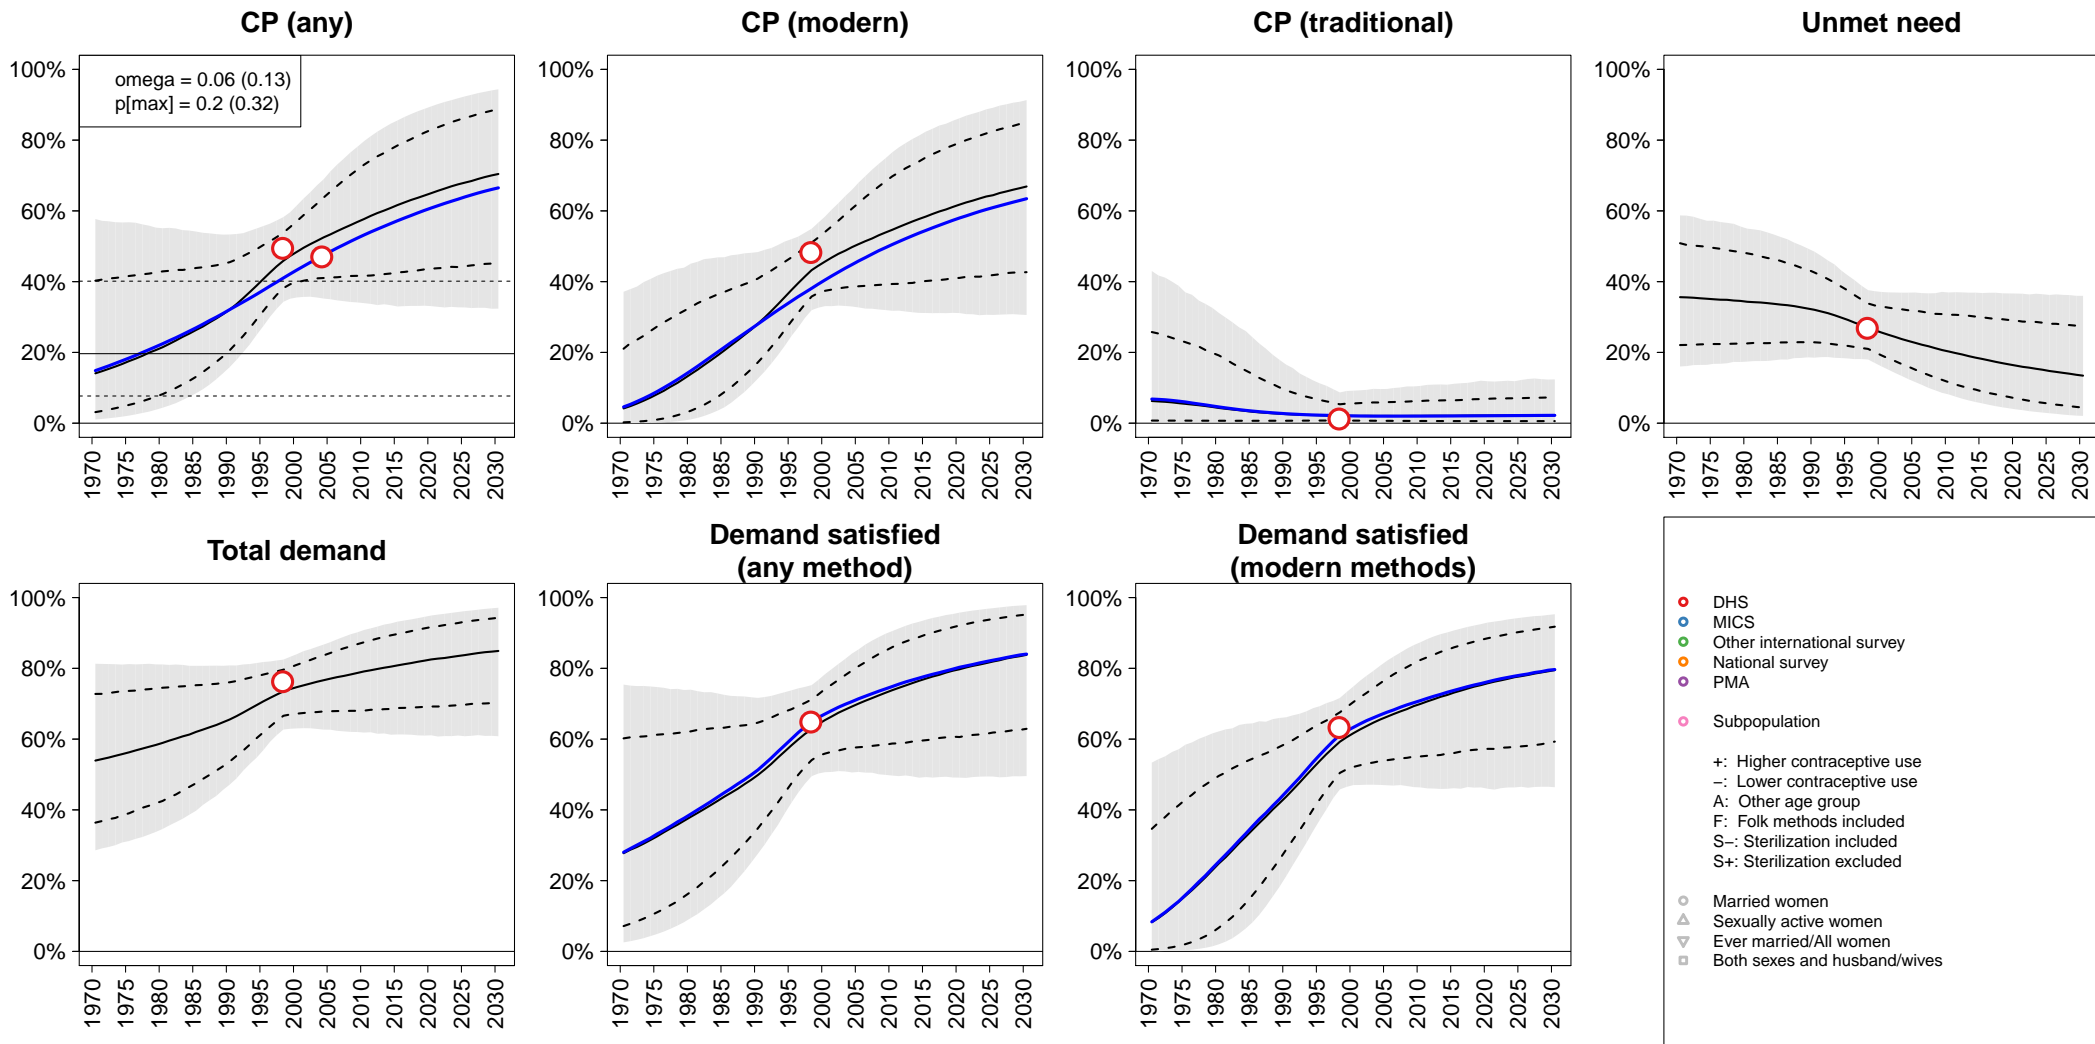

Spain (Southern Europe) --- Married / In-Union

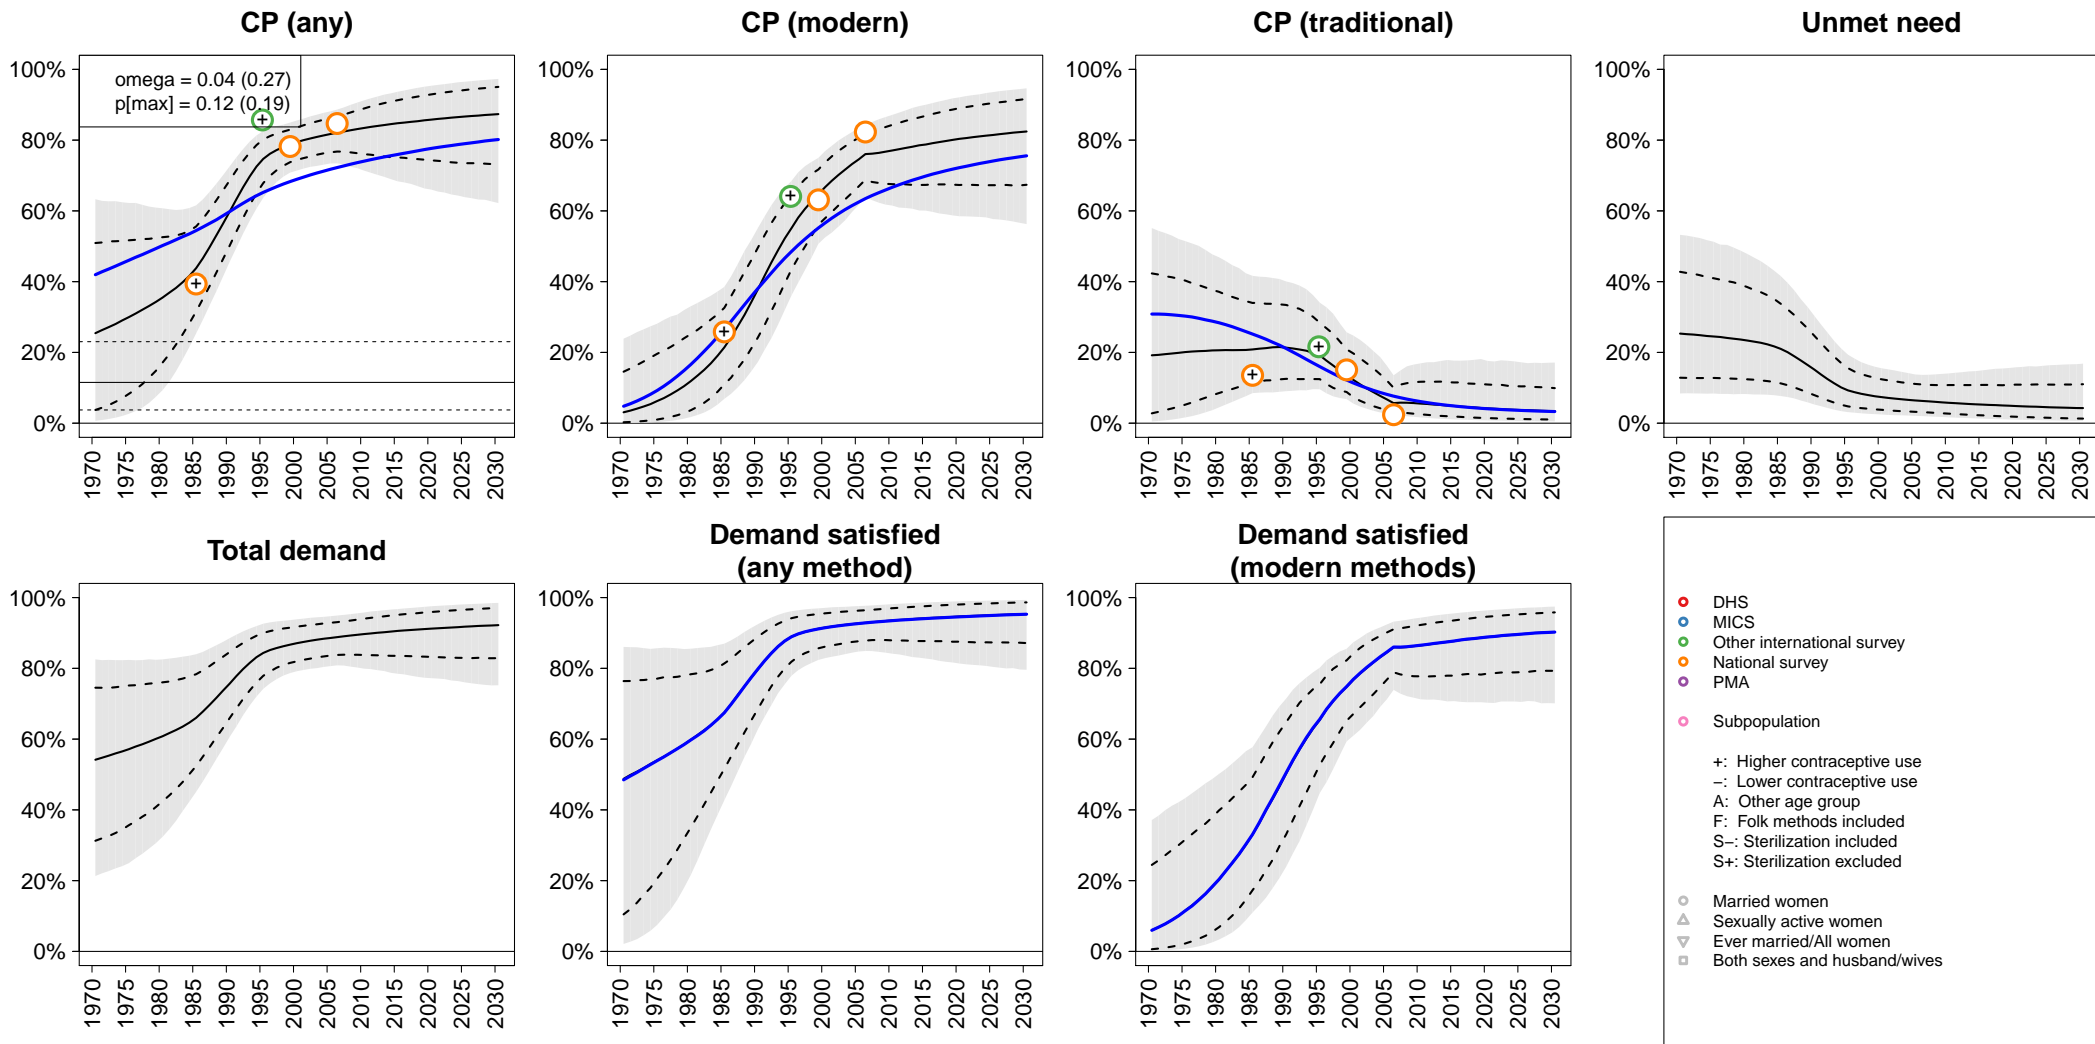



### Sri Lanka (Southern Asia) --- Married / In-Union

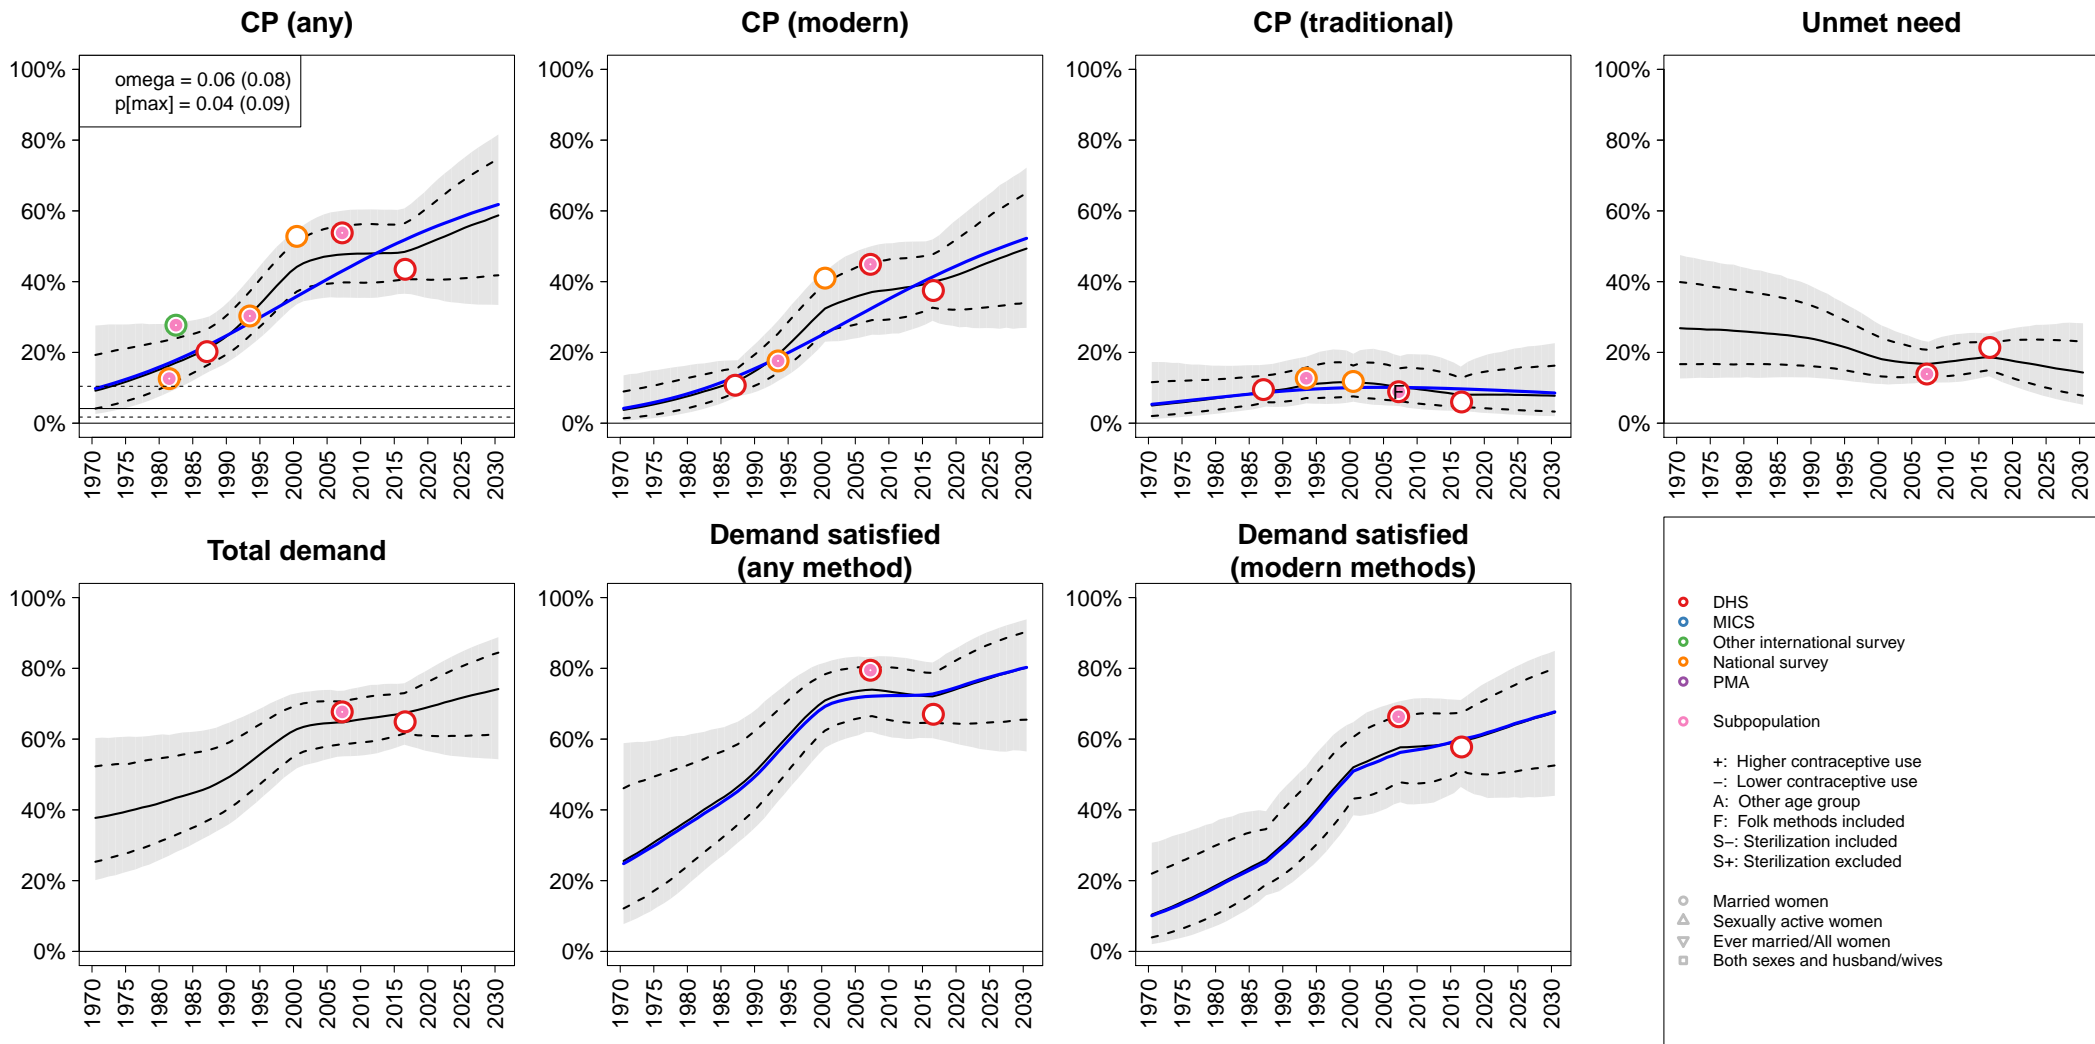

St. Lucia (Caribbean) --- Married / In-Union

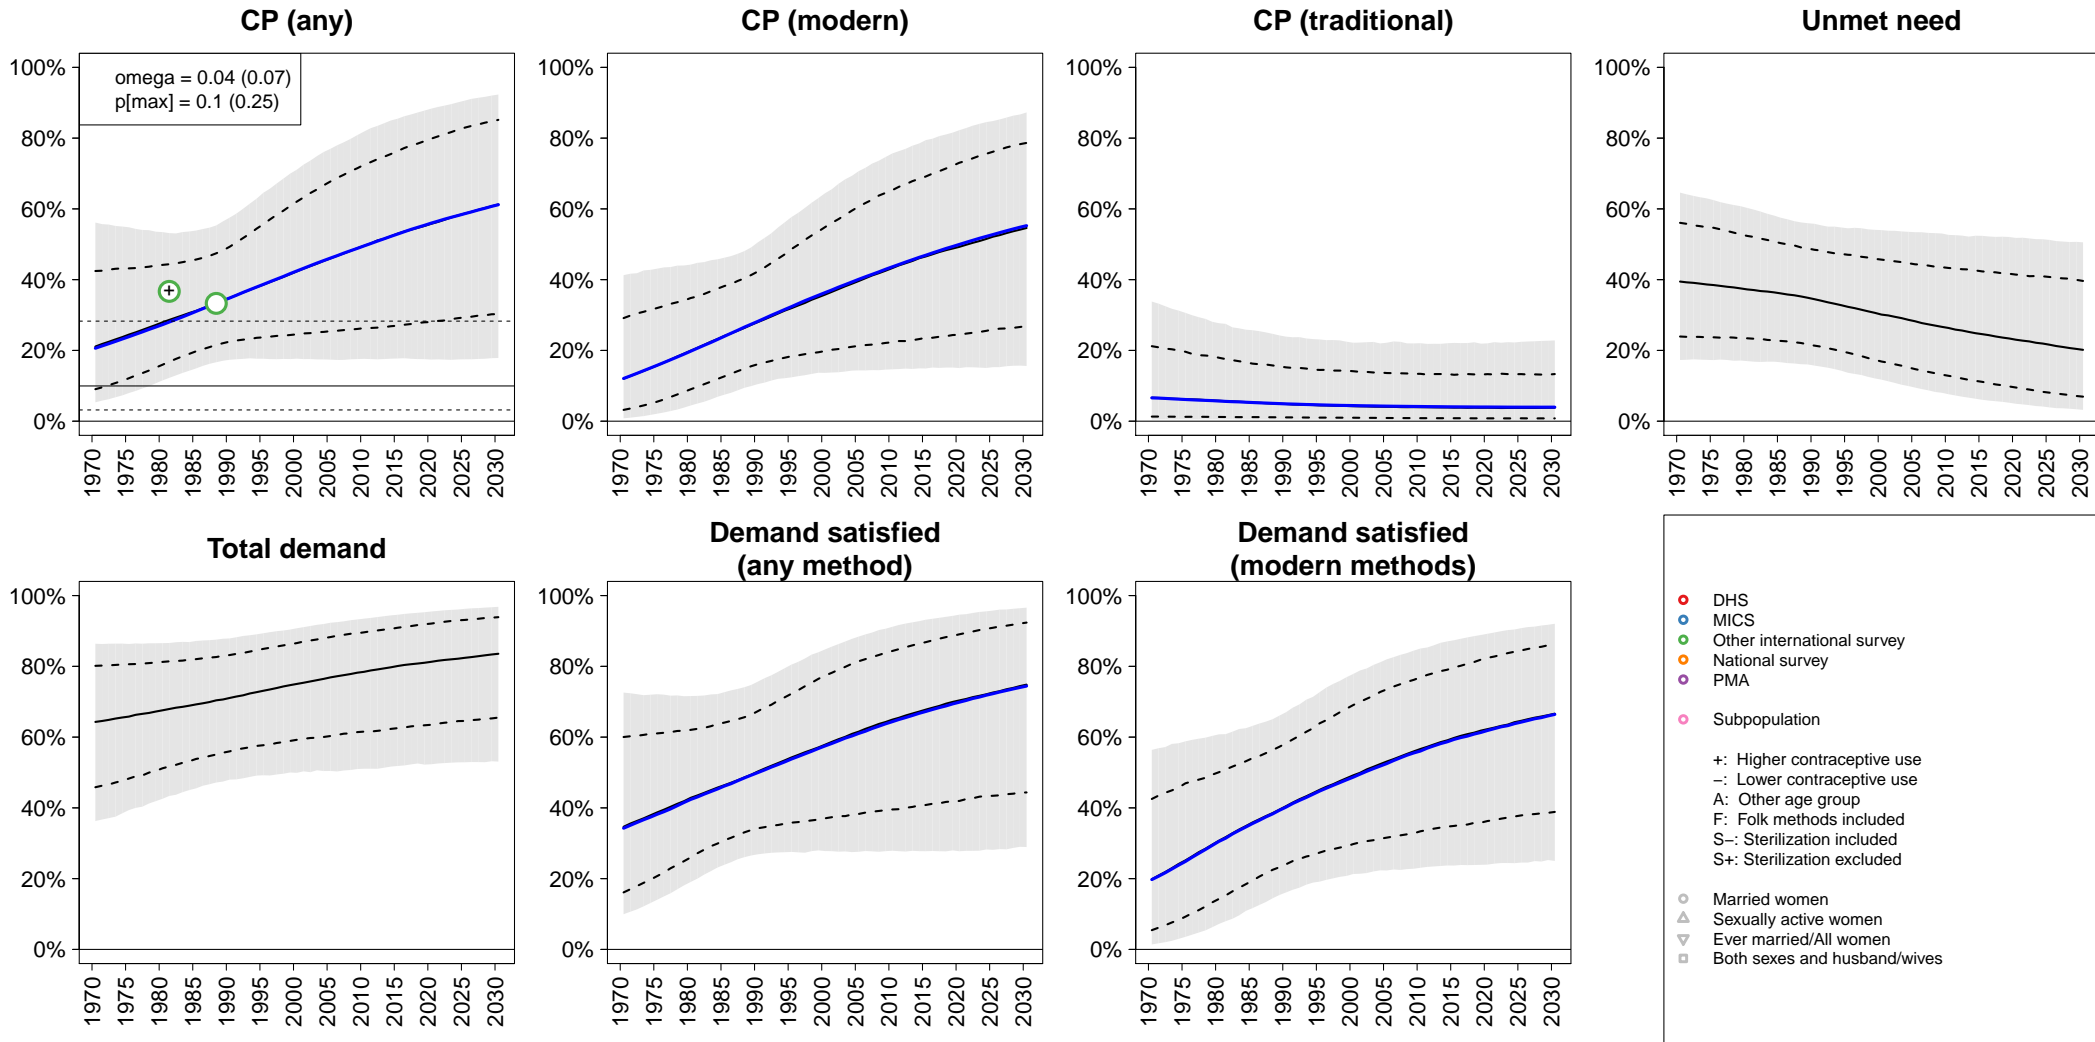

St. Vincent and the Grenadines (Caribbean) --- Married / In-Union

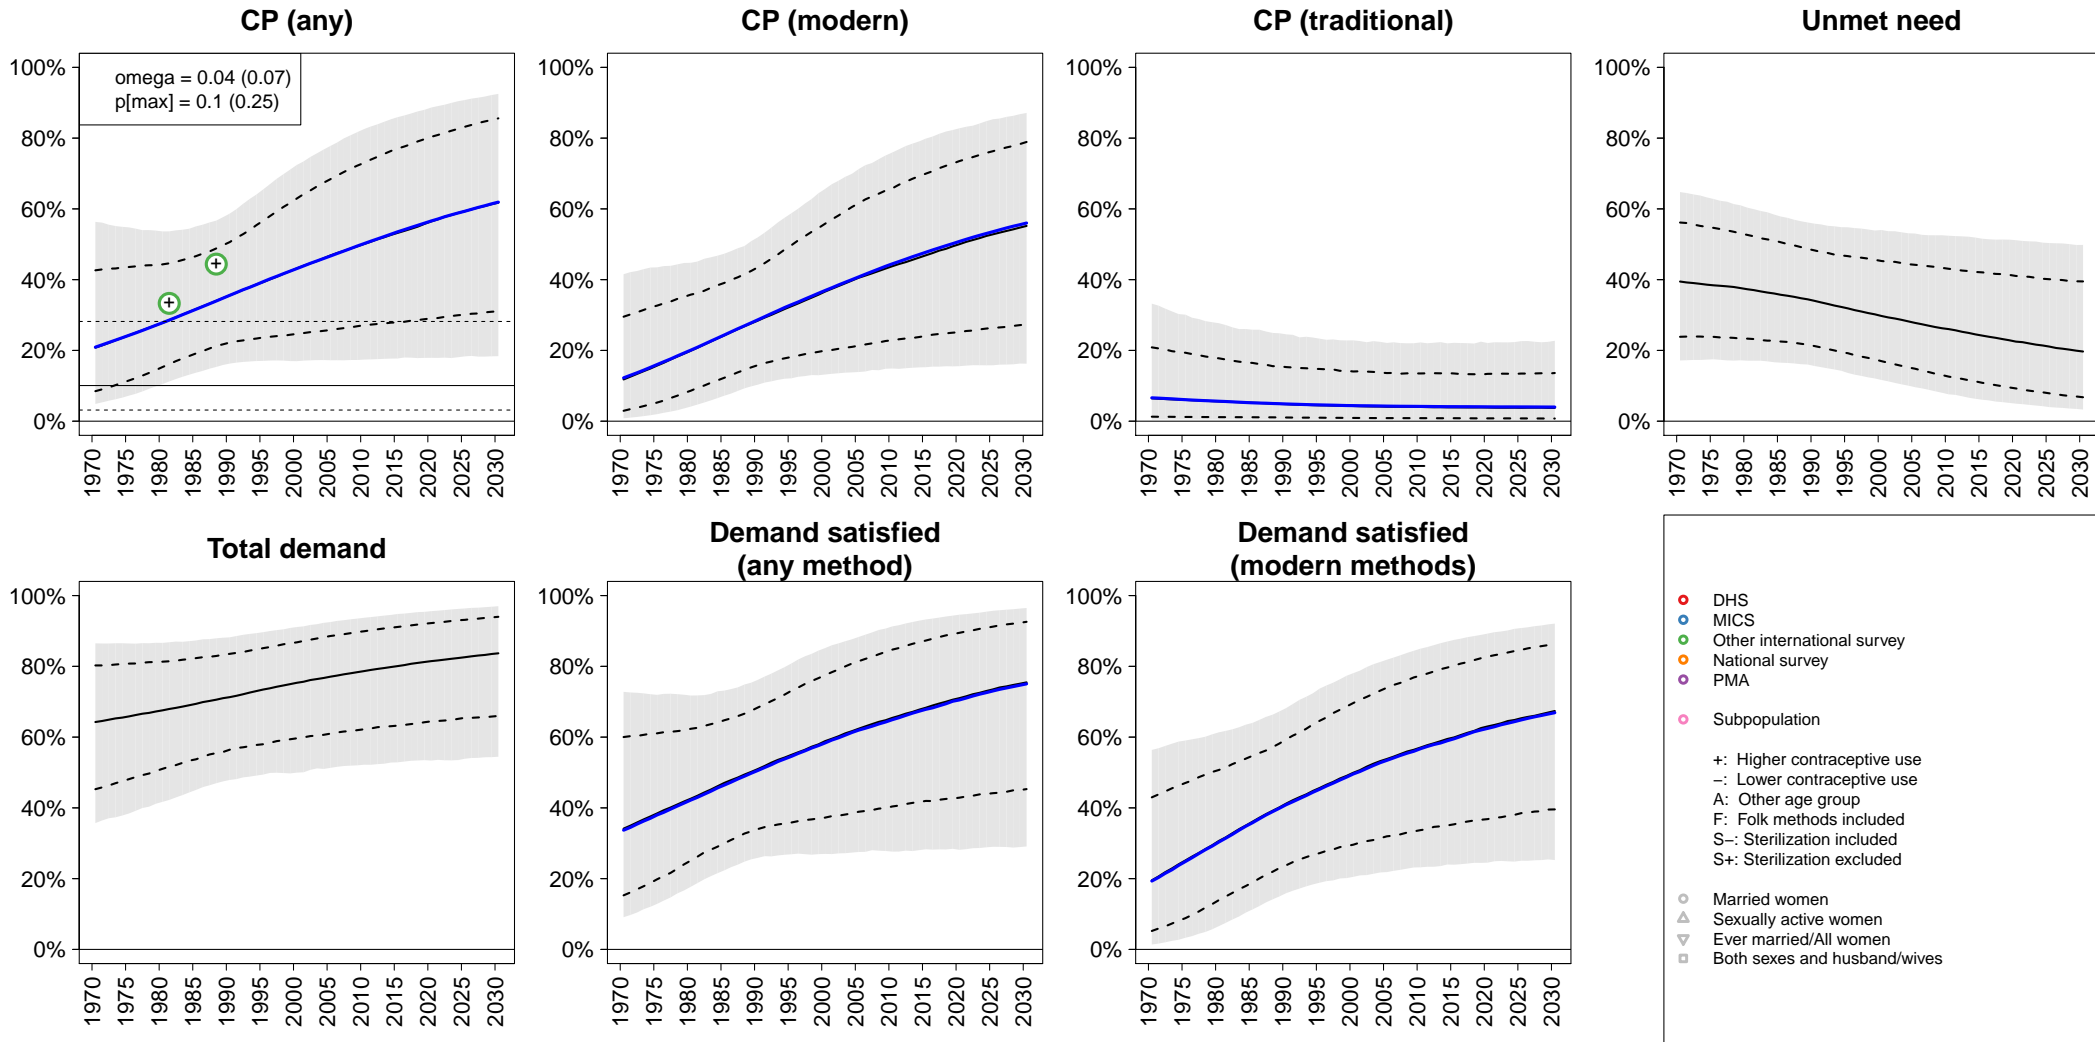

State of Palestine (Western Asia) --- Married / In-Union

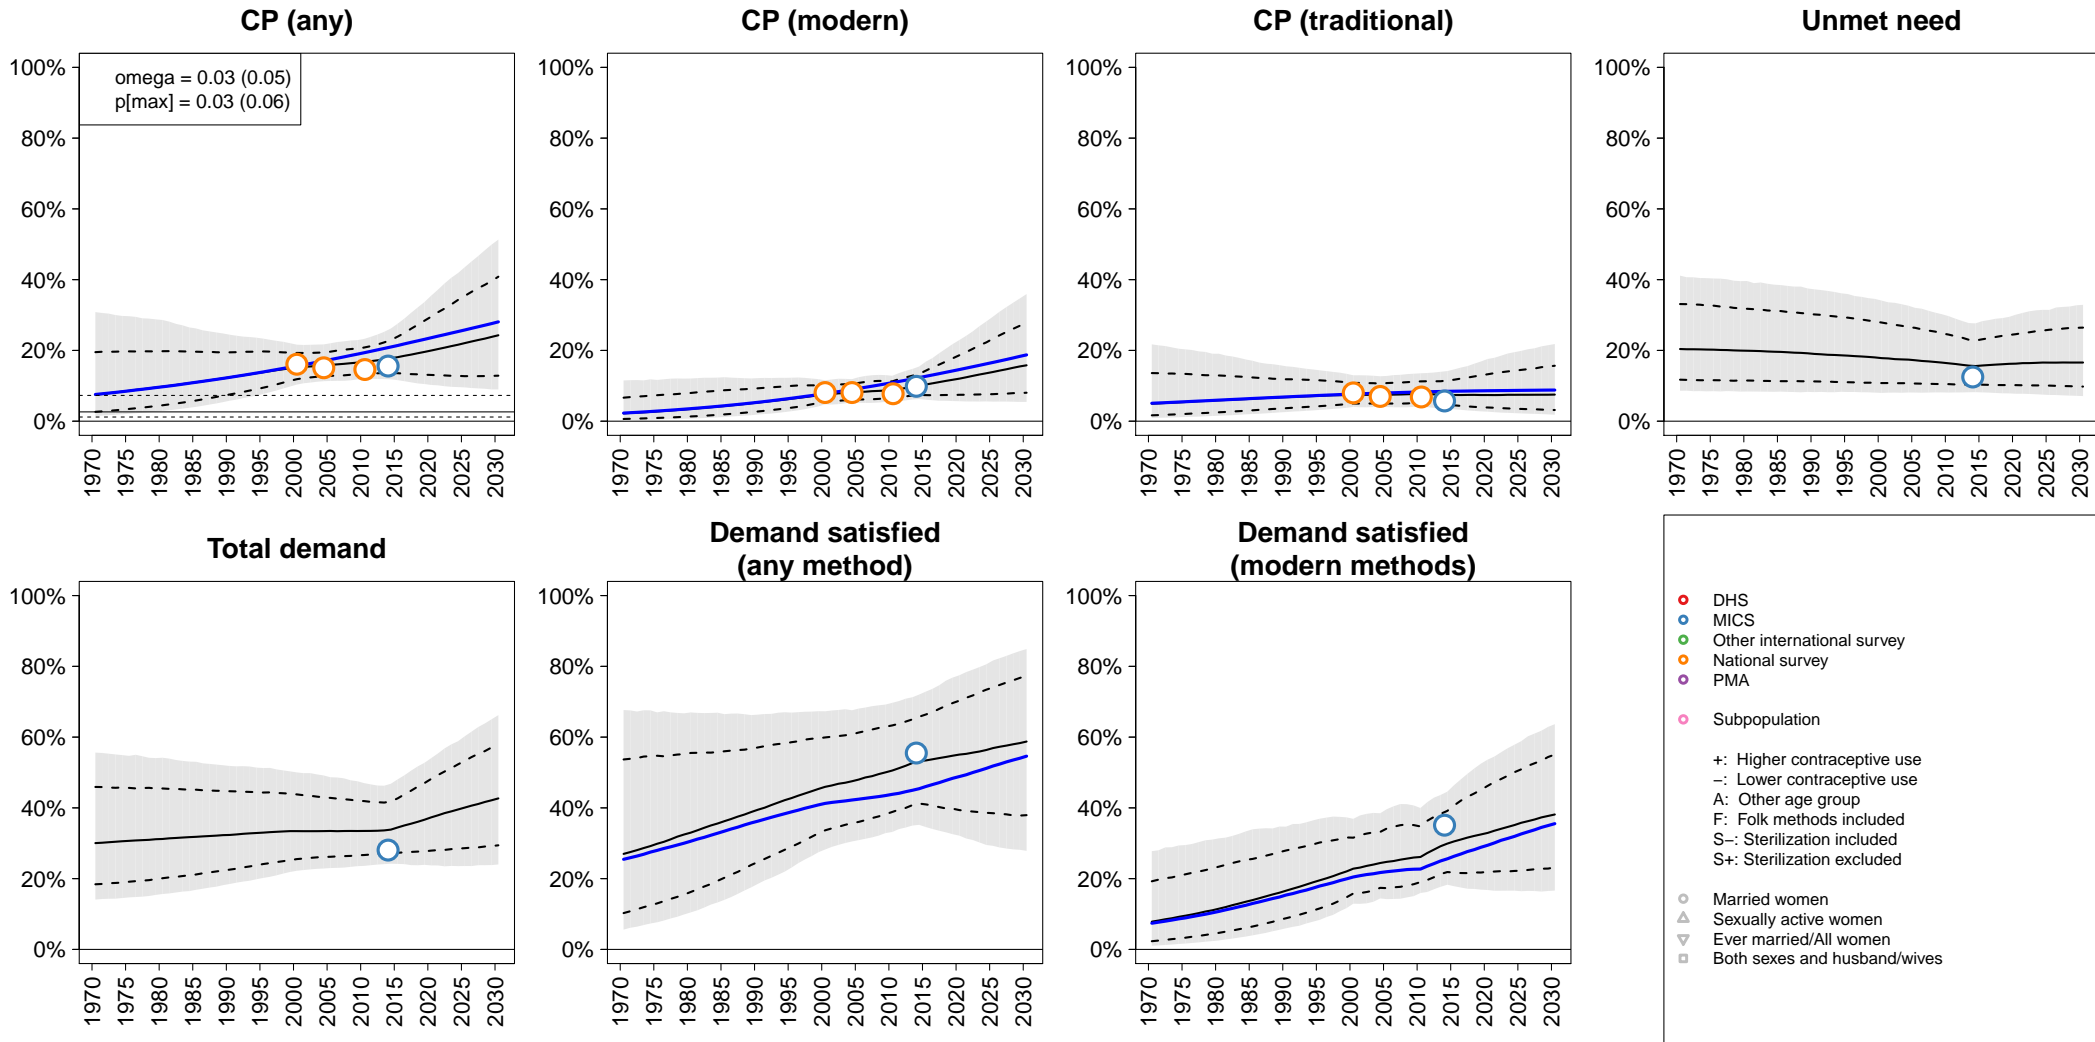

### Sudan (Northern Africa) --- Married / In-Union

**CP (any)**

**CP (modern)**

**CP (traditional)**

**Unmet need**

**Total demand**

**Demand satisfied (any method)**

**Demand satisfied (modern methods)**

● DHS  
● MICS  
● Other international survey  
● National survey  
● PMA  
● Subpopulation  
  
+: Higher contraceptive use  
-: Lower contraceptive use  
A: Other age group  
F: Folk methods included  
S-: Sterilization included  
S+: Sterilization excluded  
  
○ Married women  
△ Sexually active women  
▽ Ever married/All women  
□ Both sexes and husband/wives

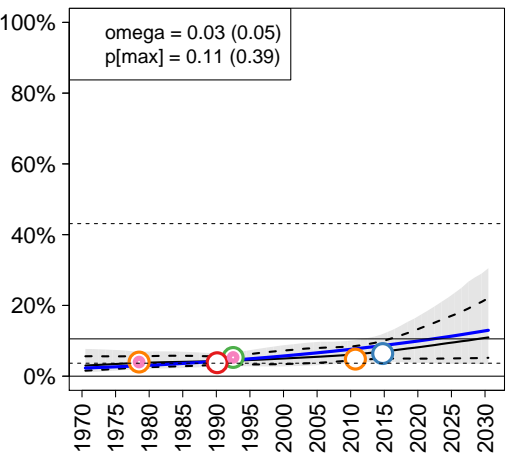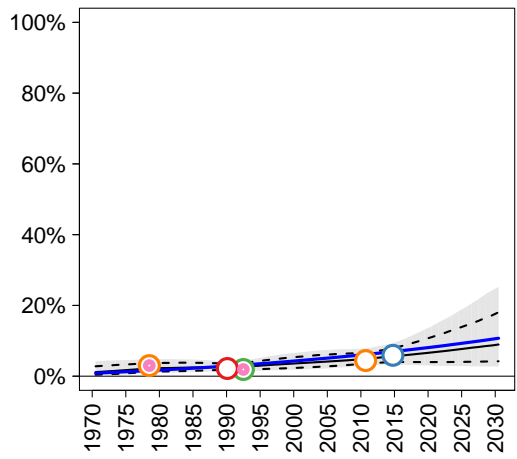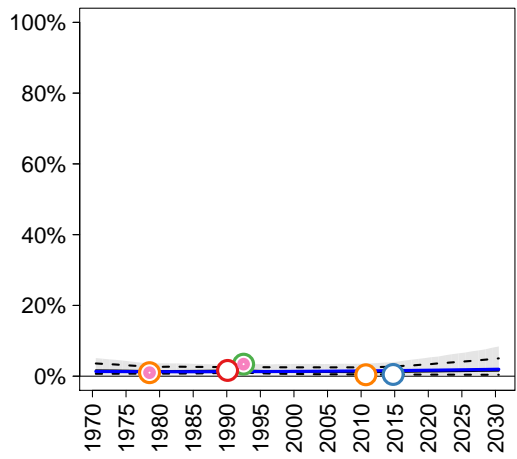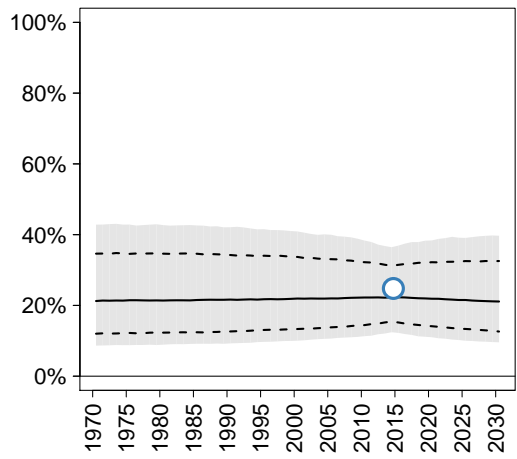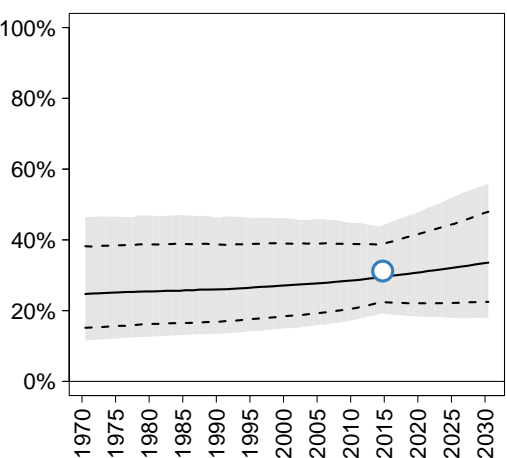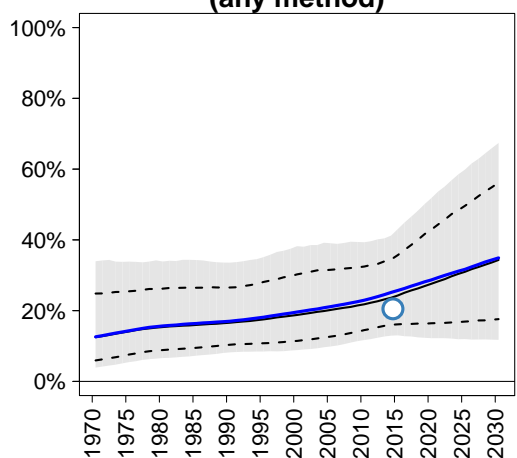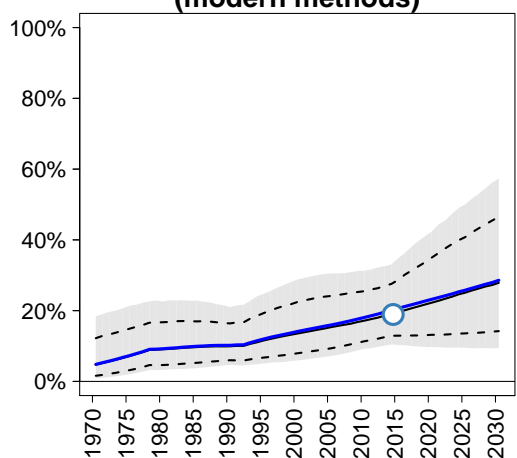

Suriname (South America) --- Married / In-Union

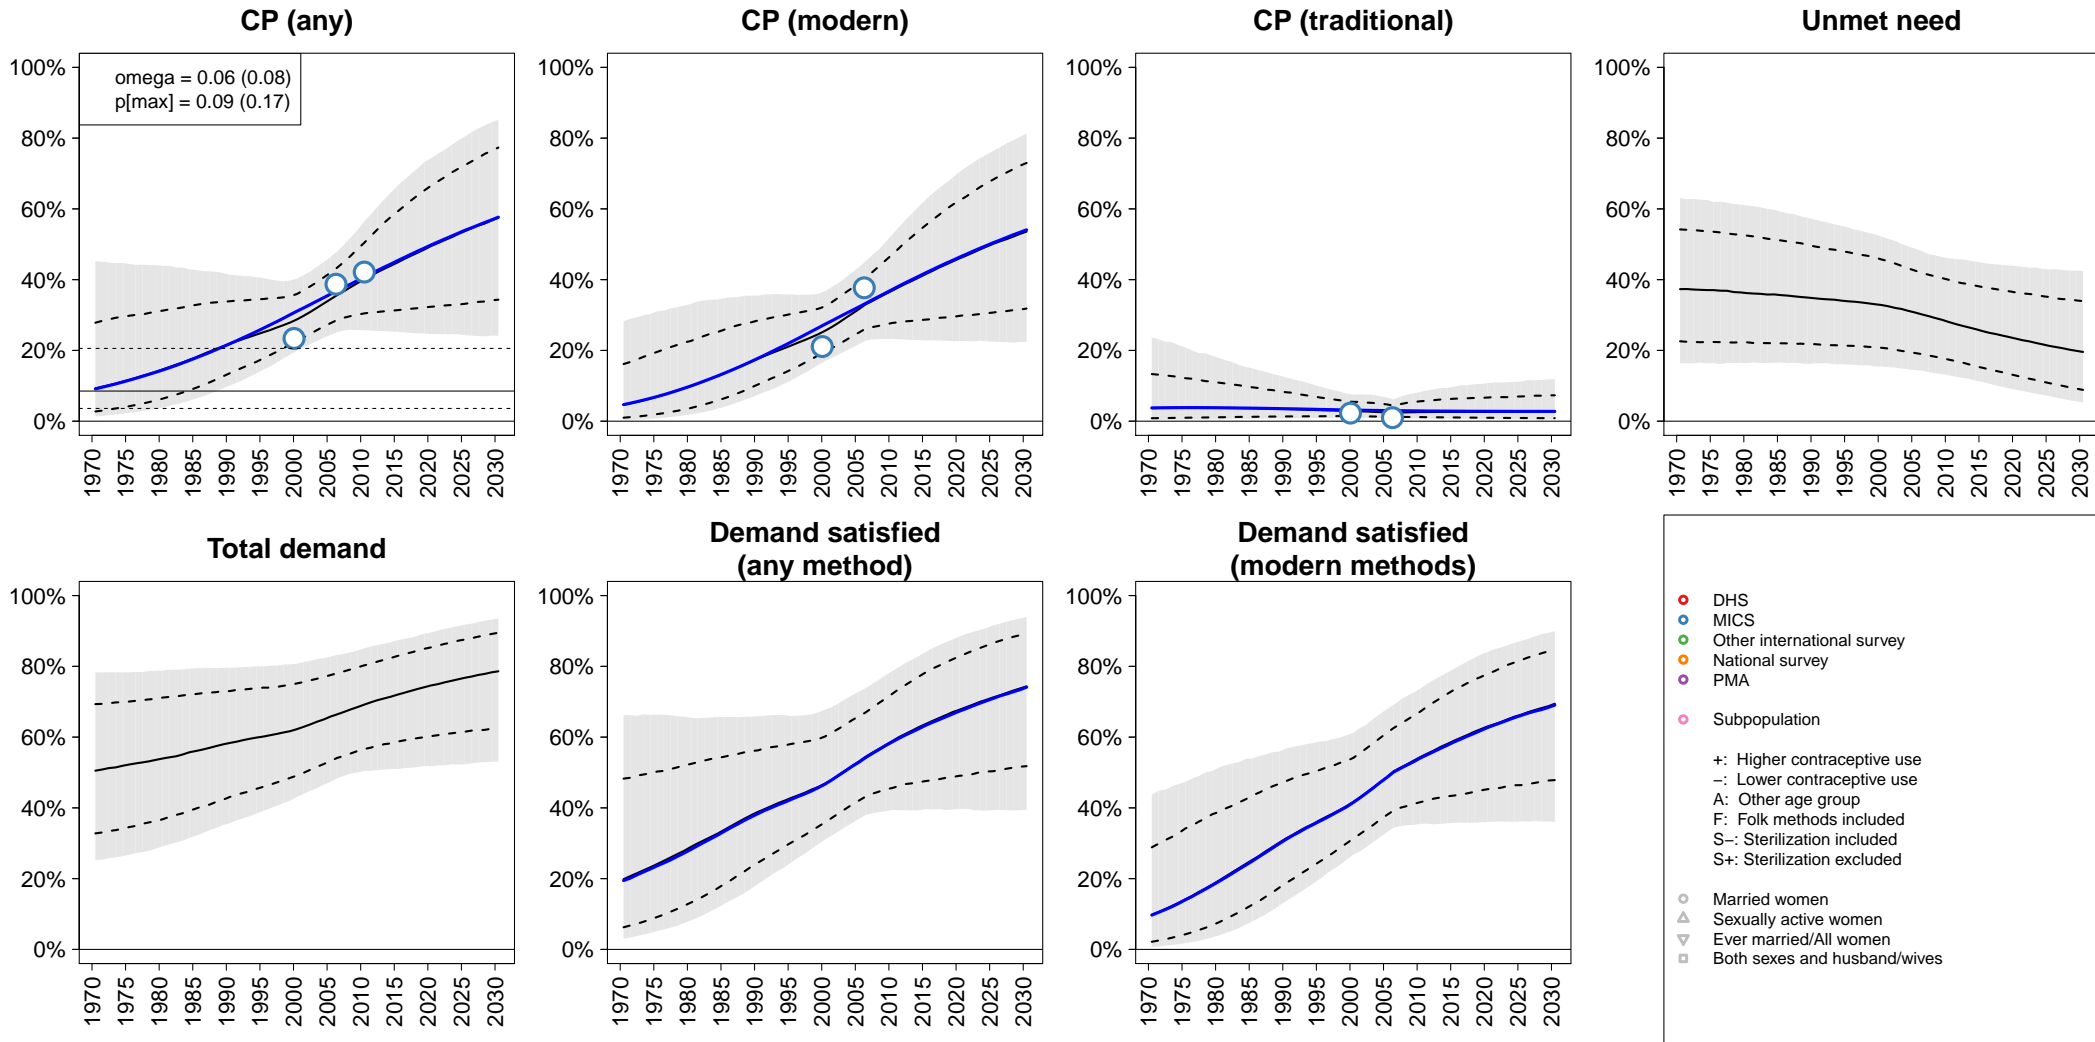

Syrian Arab Republic (Western Asia) --- Married / In-Union

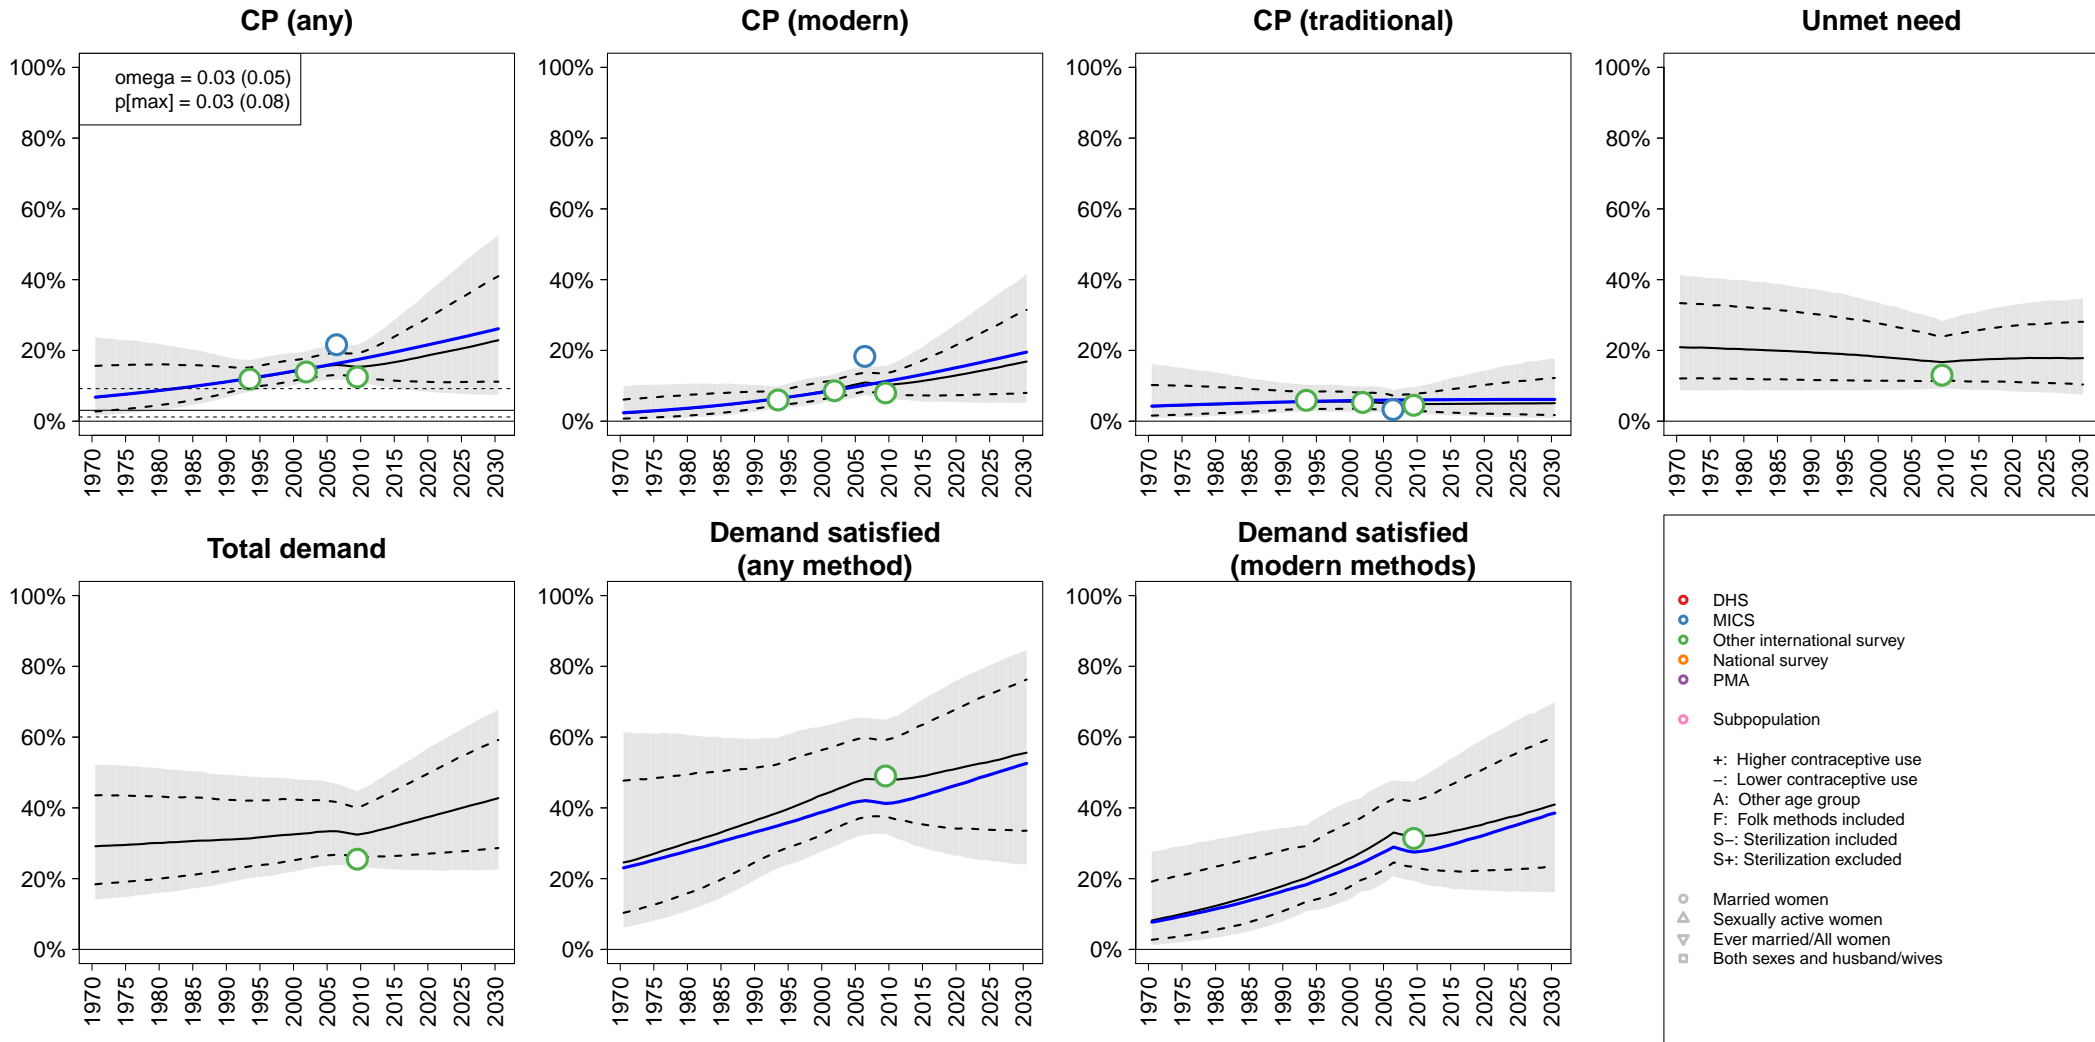

Tajikistan (Central Asia) --- Married / In-Union

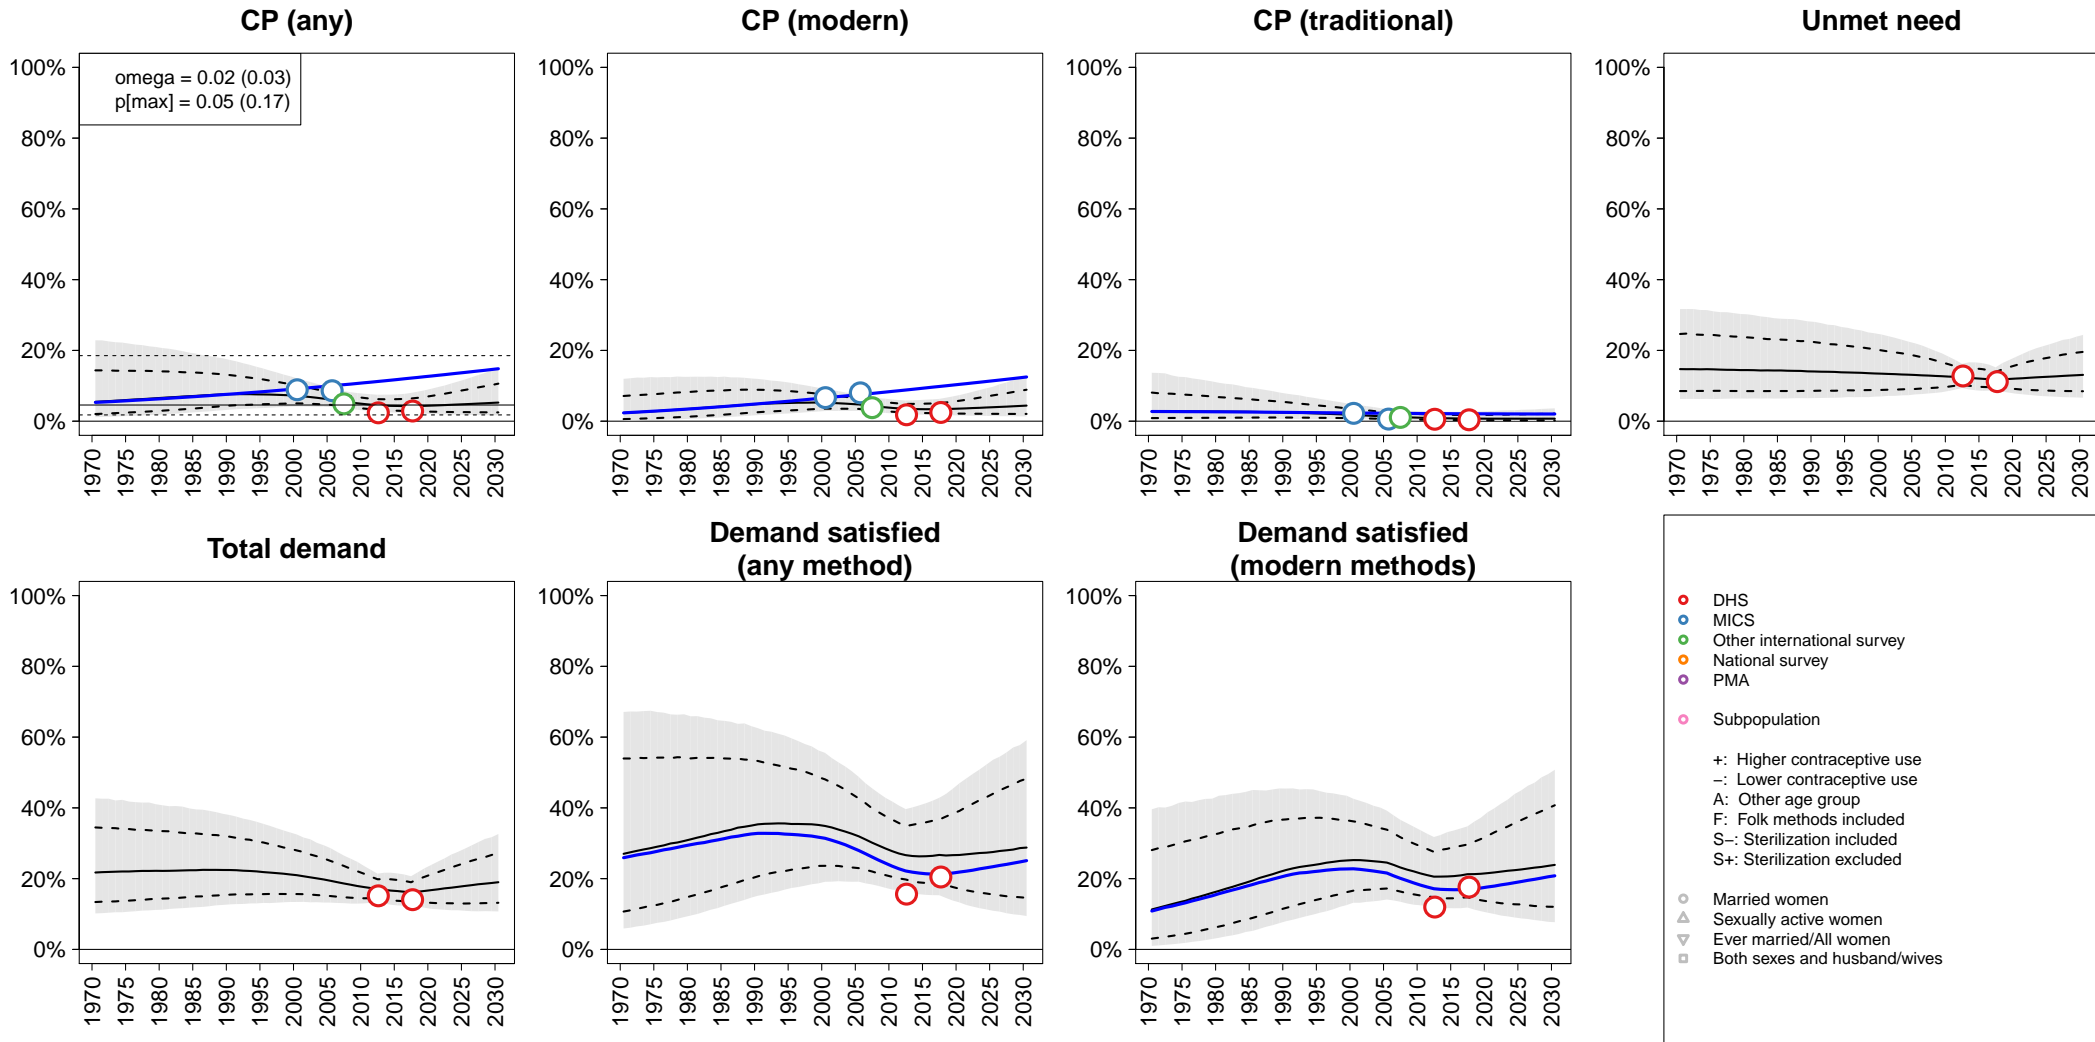



Thailand (South-eastern Asia) --- Married / In-Union

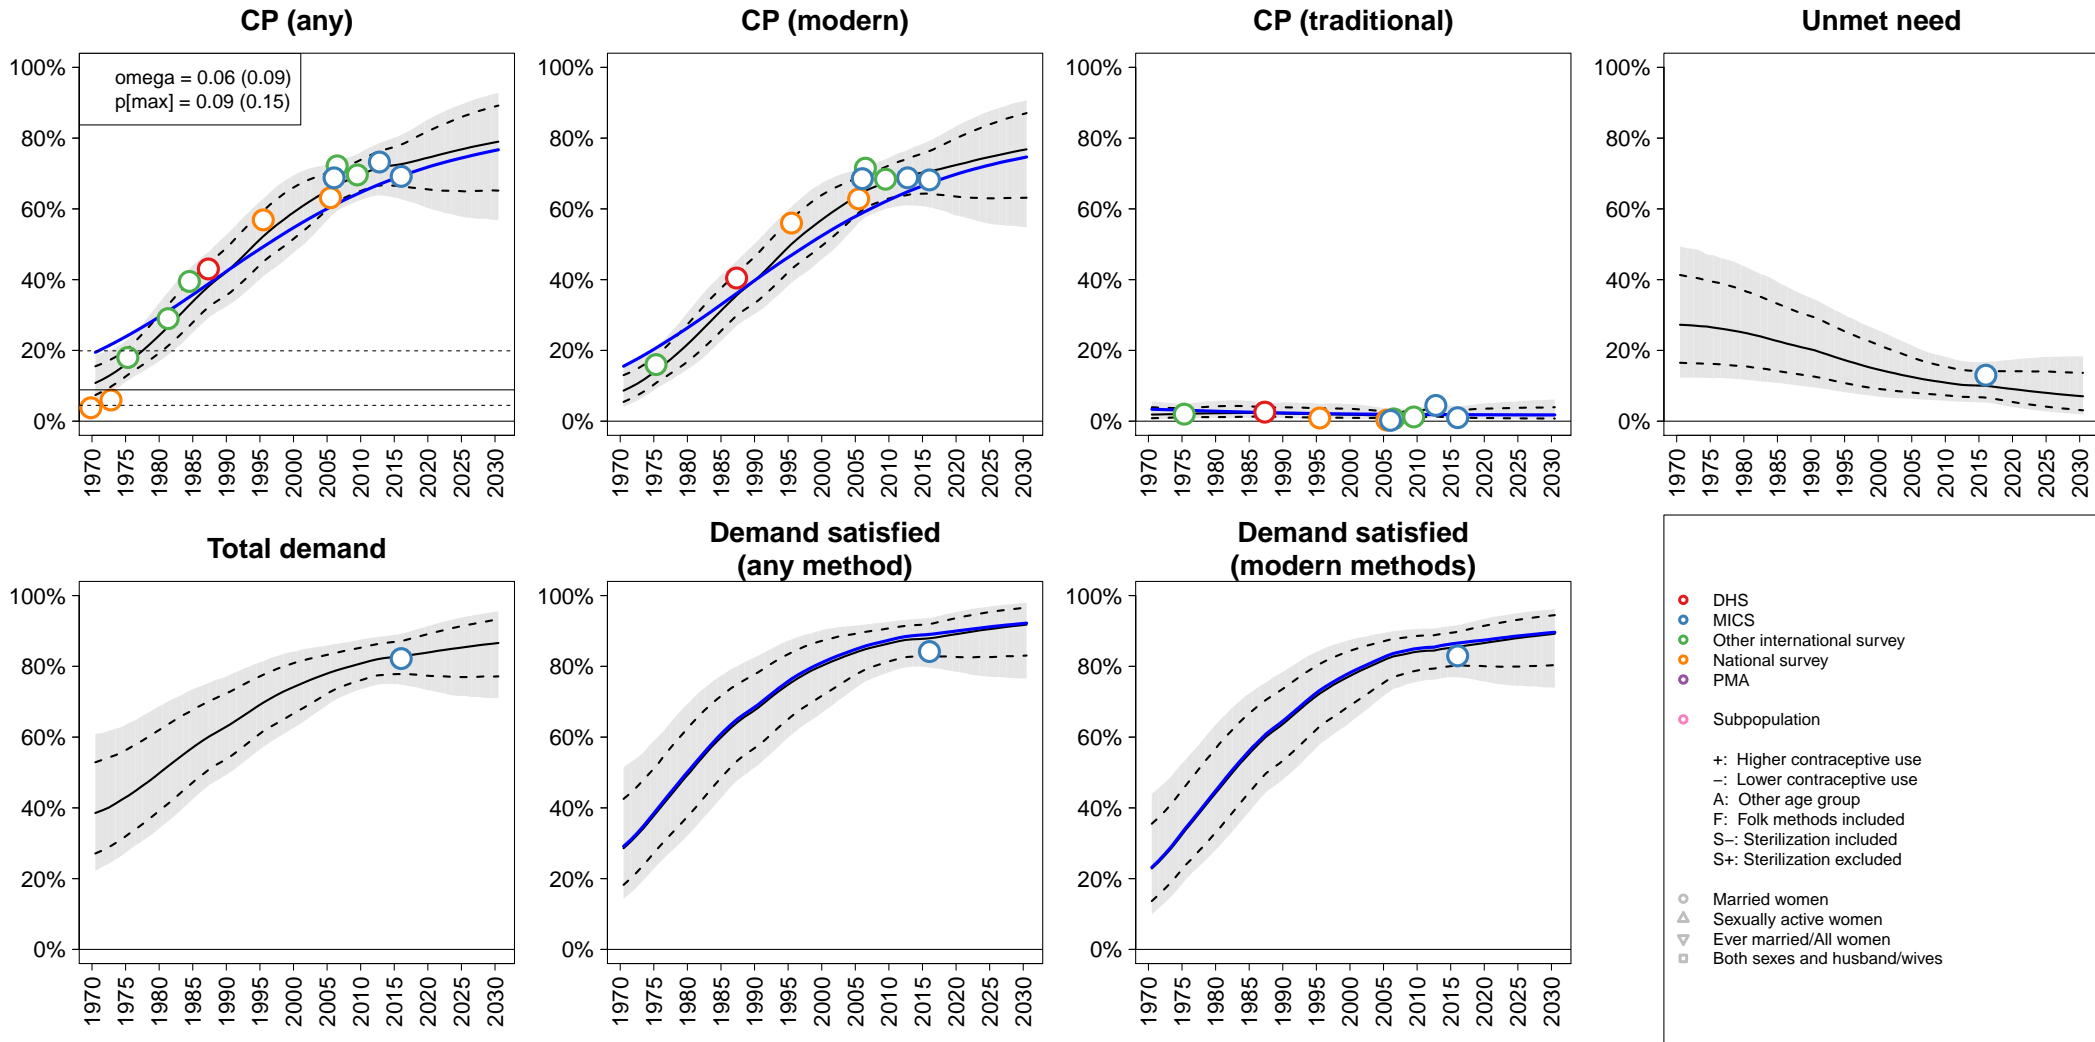

Togo (Western Africa) --- Married / In-Union

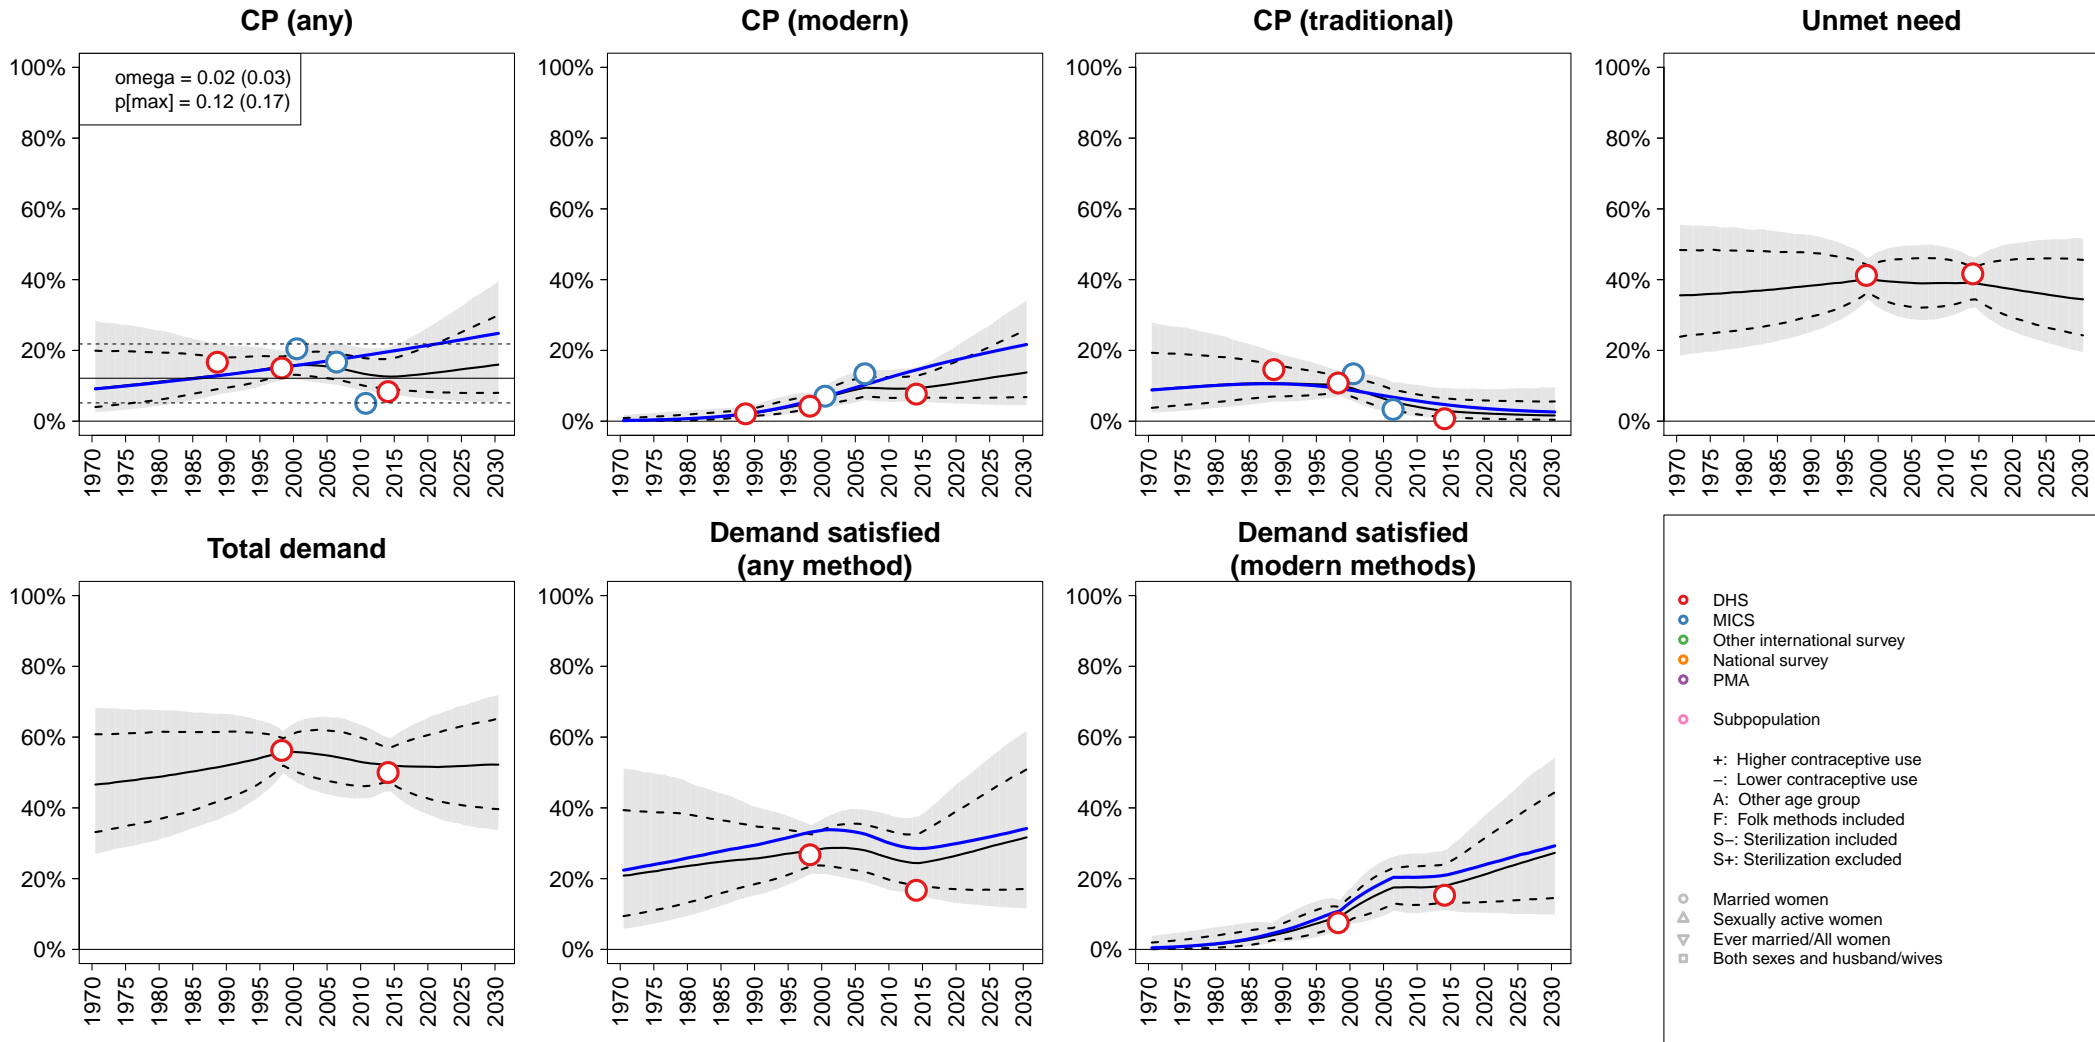

Trinidad and Tobago (Caribbean) ---- Married / In-Union

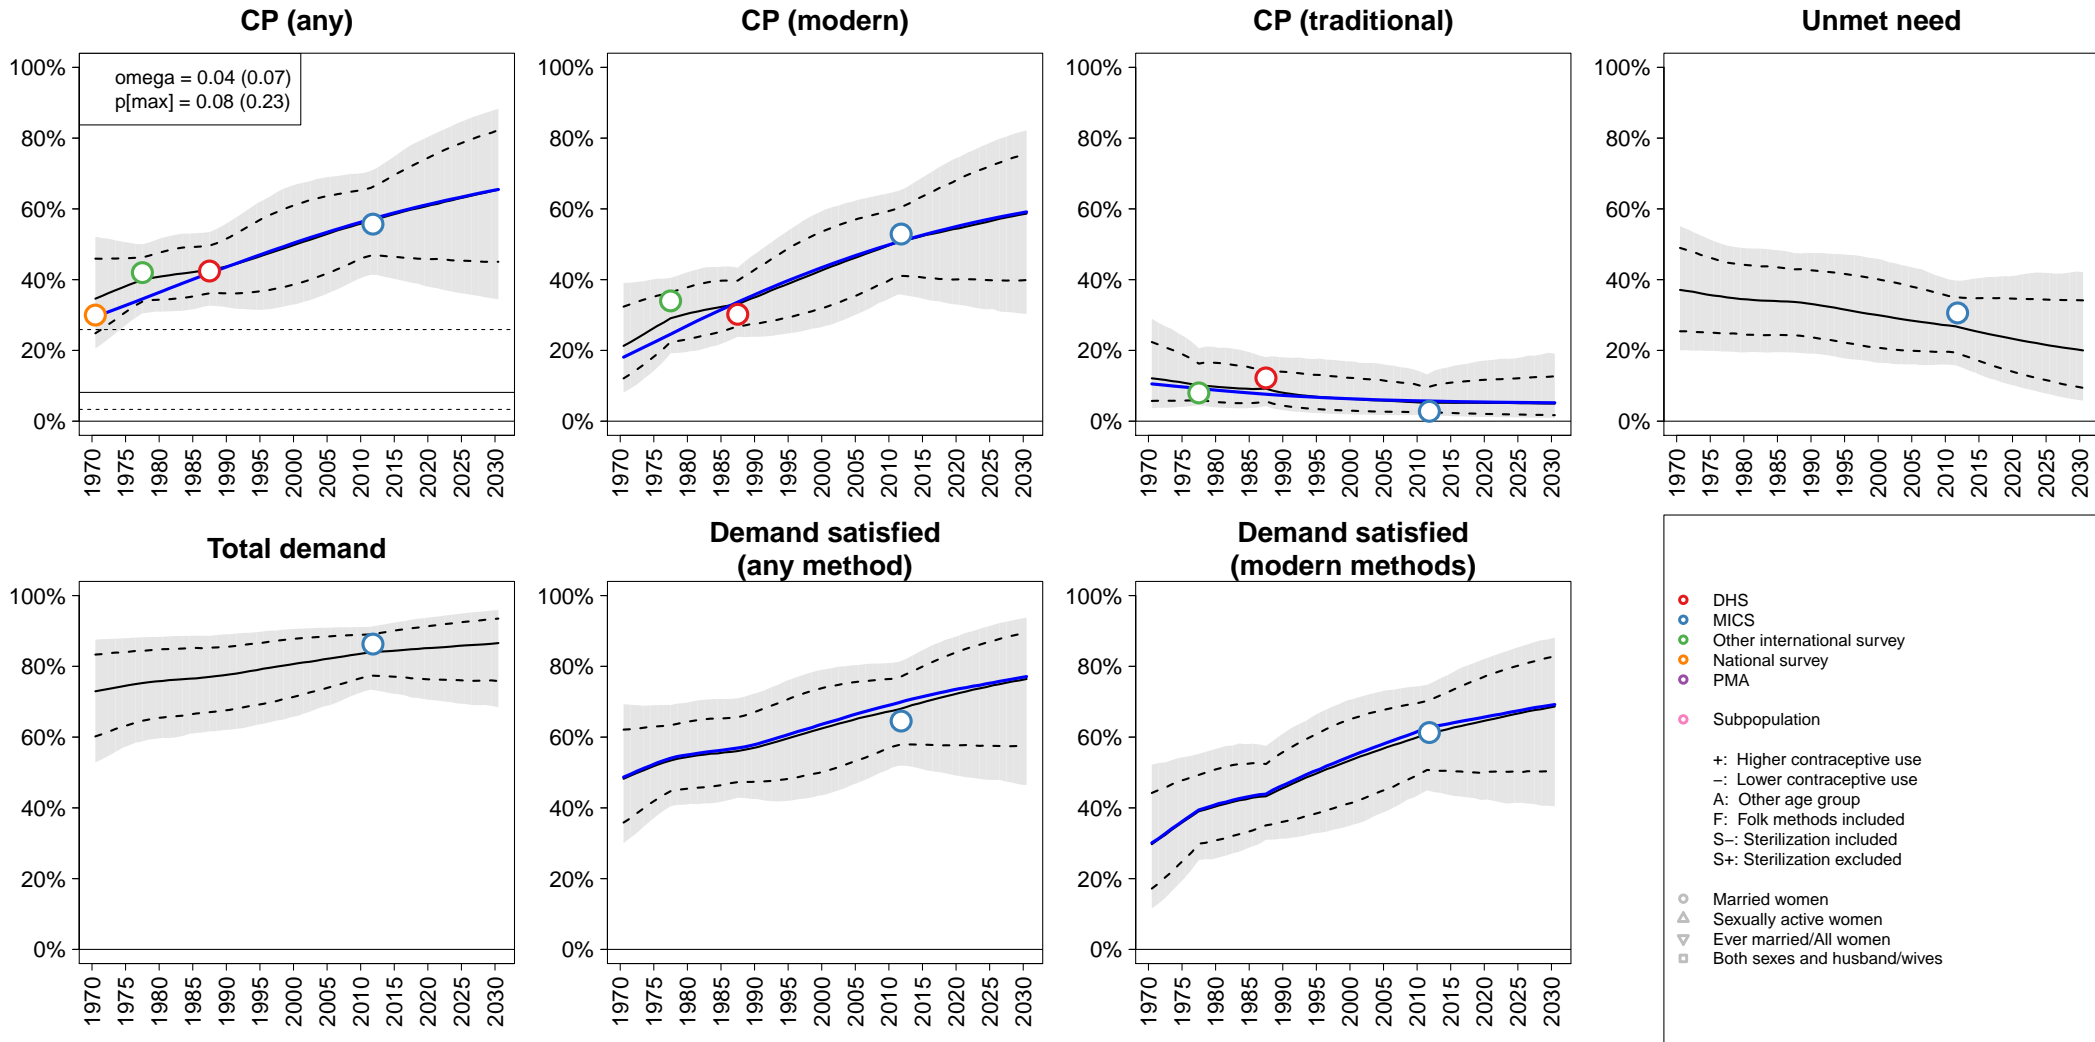

Tunisia (Northern Africa) --- Married / In-Union

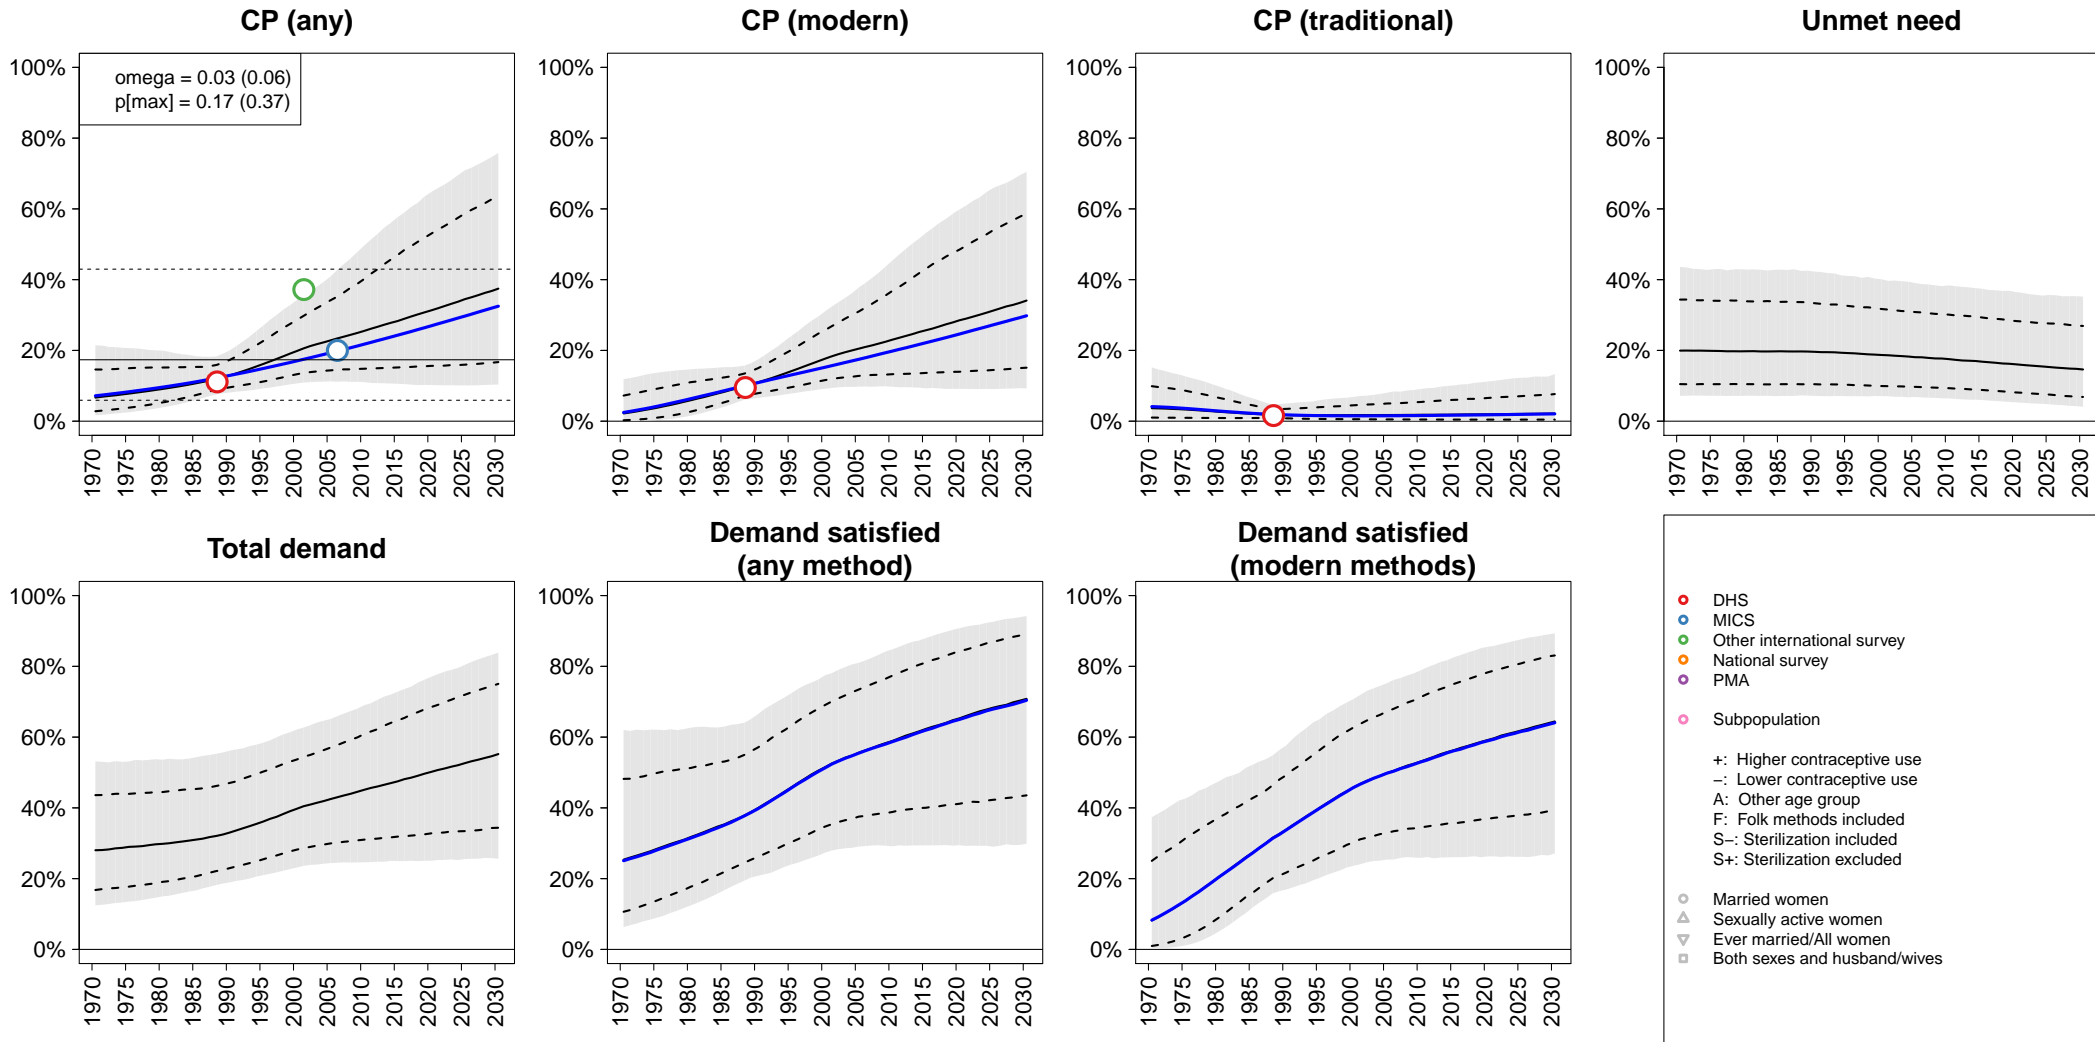

Turkey (Western Asia) --- Married / In-Union

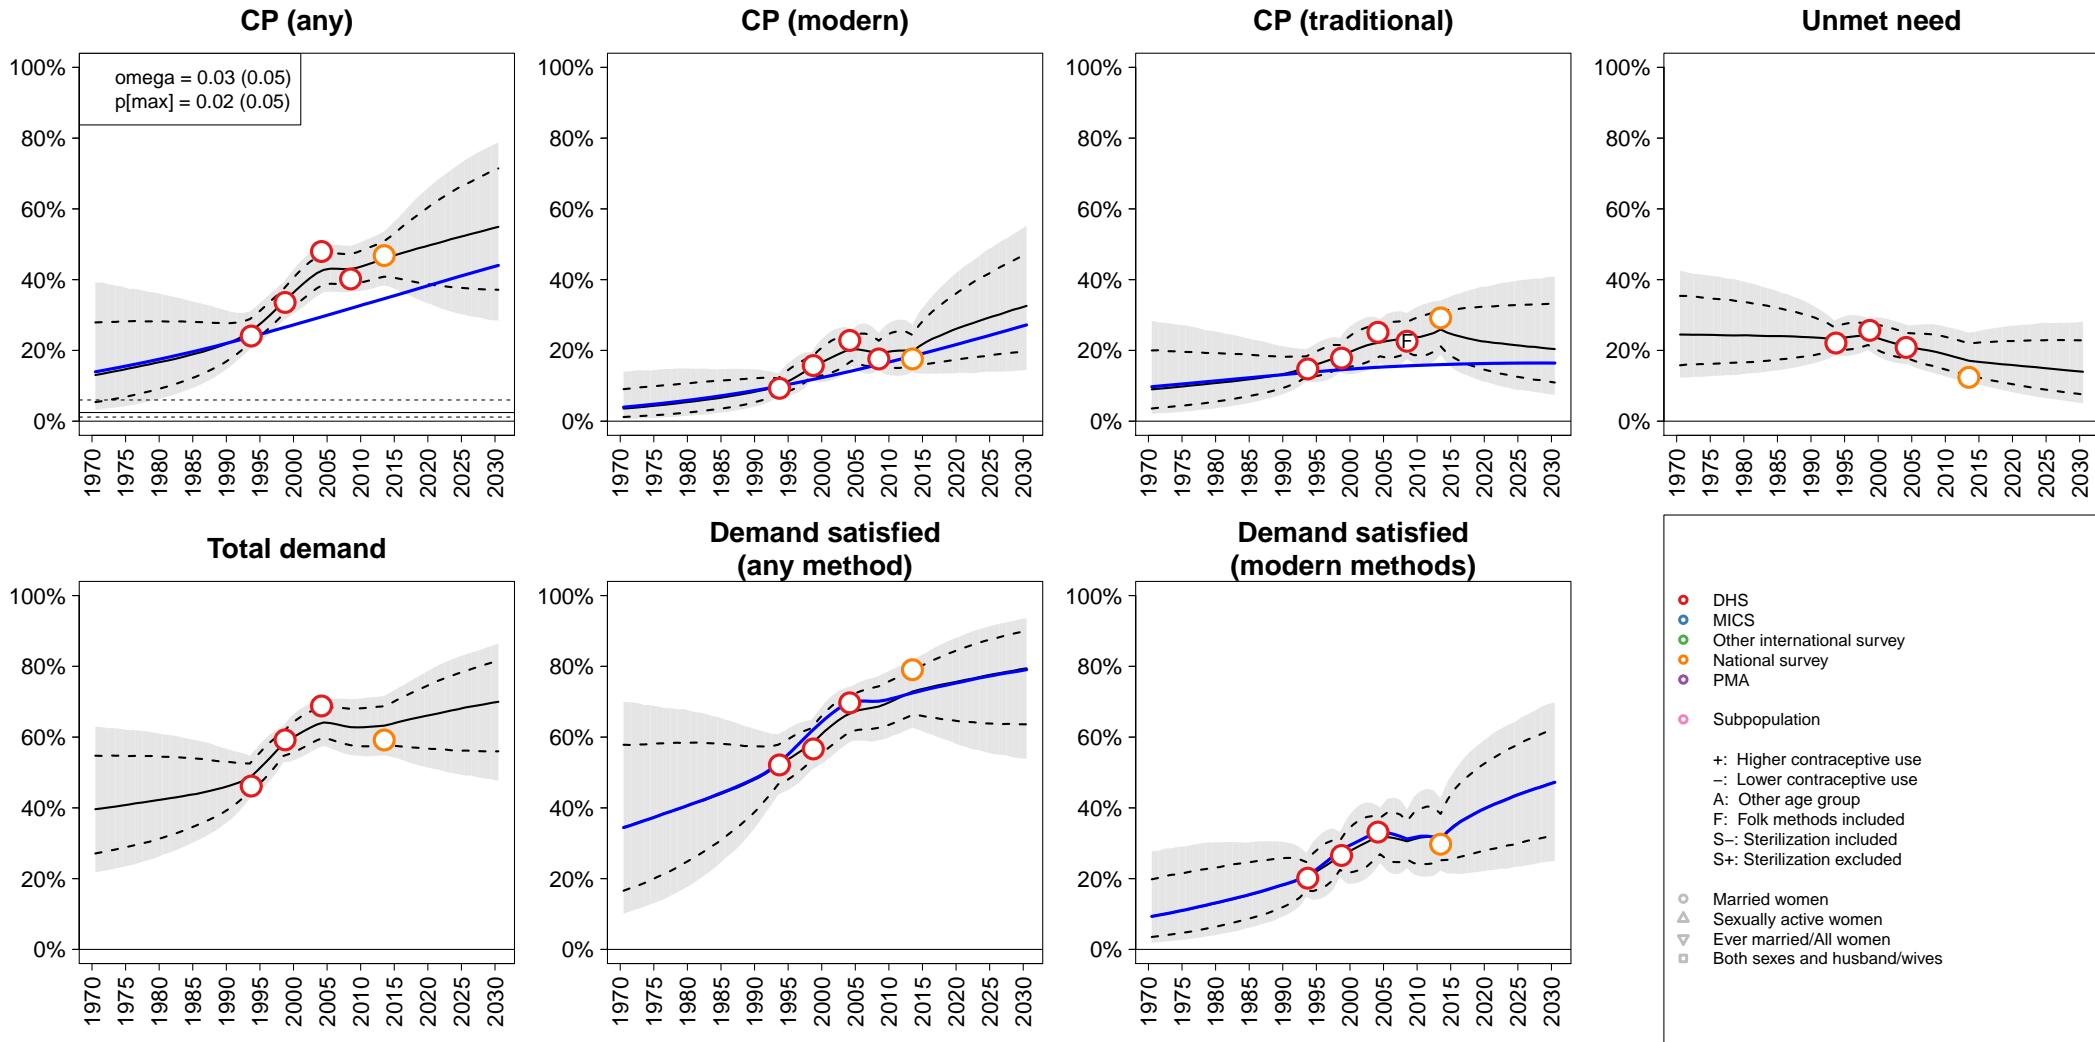

Turkmenistan (Central Asia) --- Married / In-Union

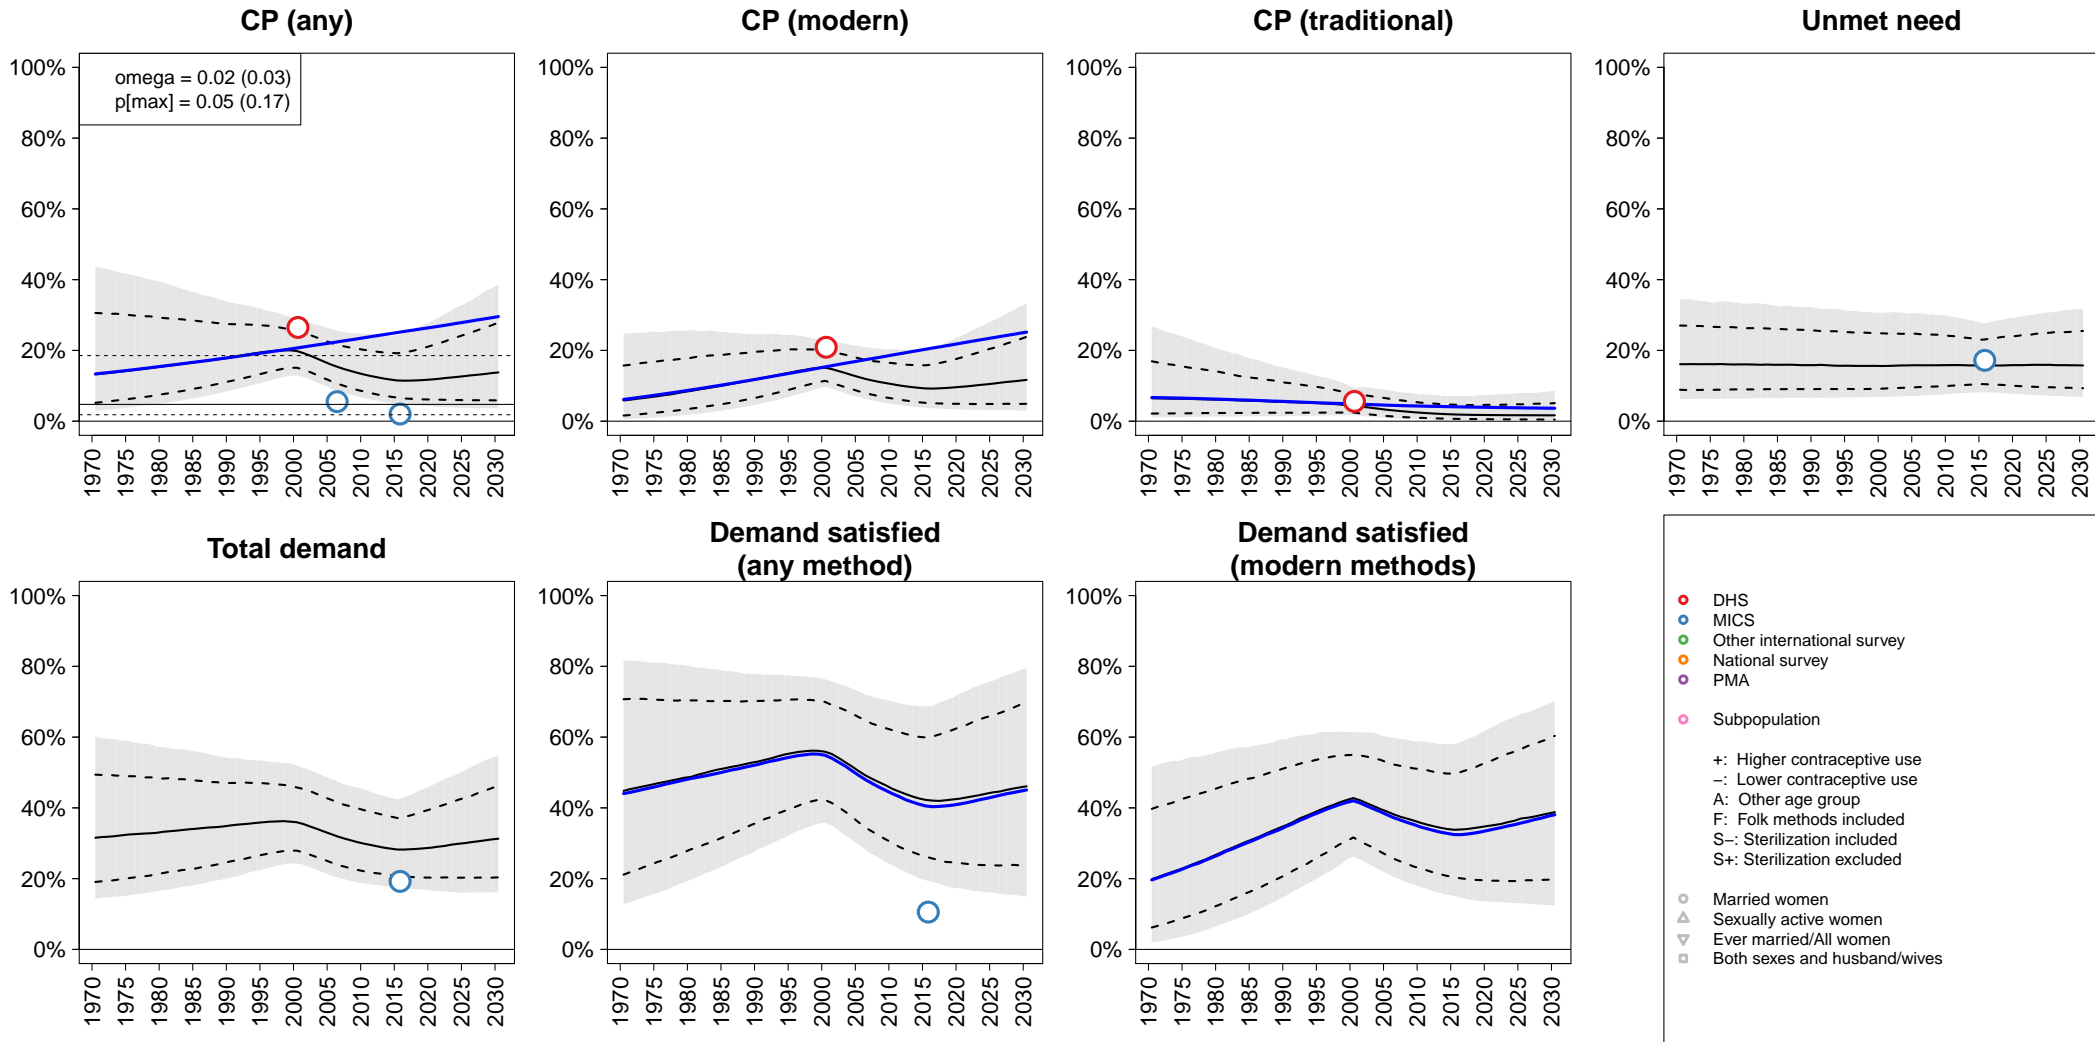

Uganda (Eastern Africa) --- Married / In-Union

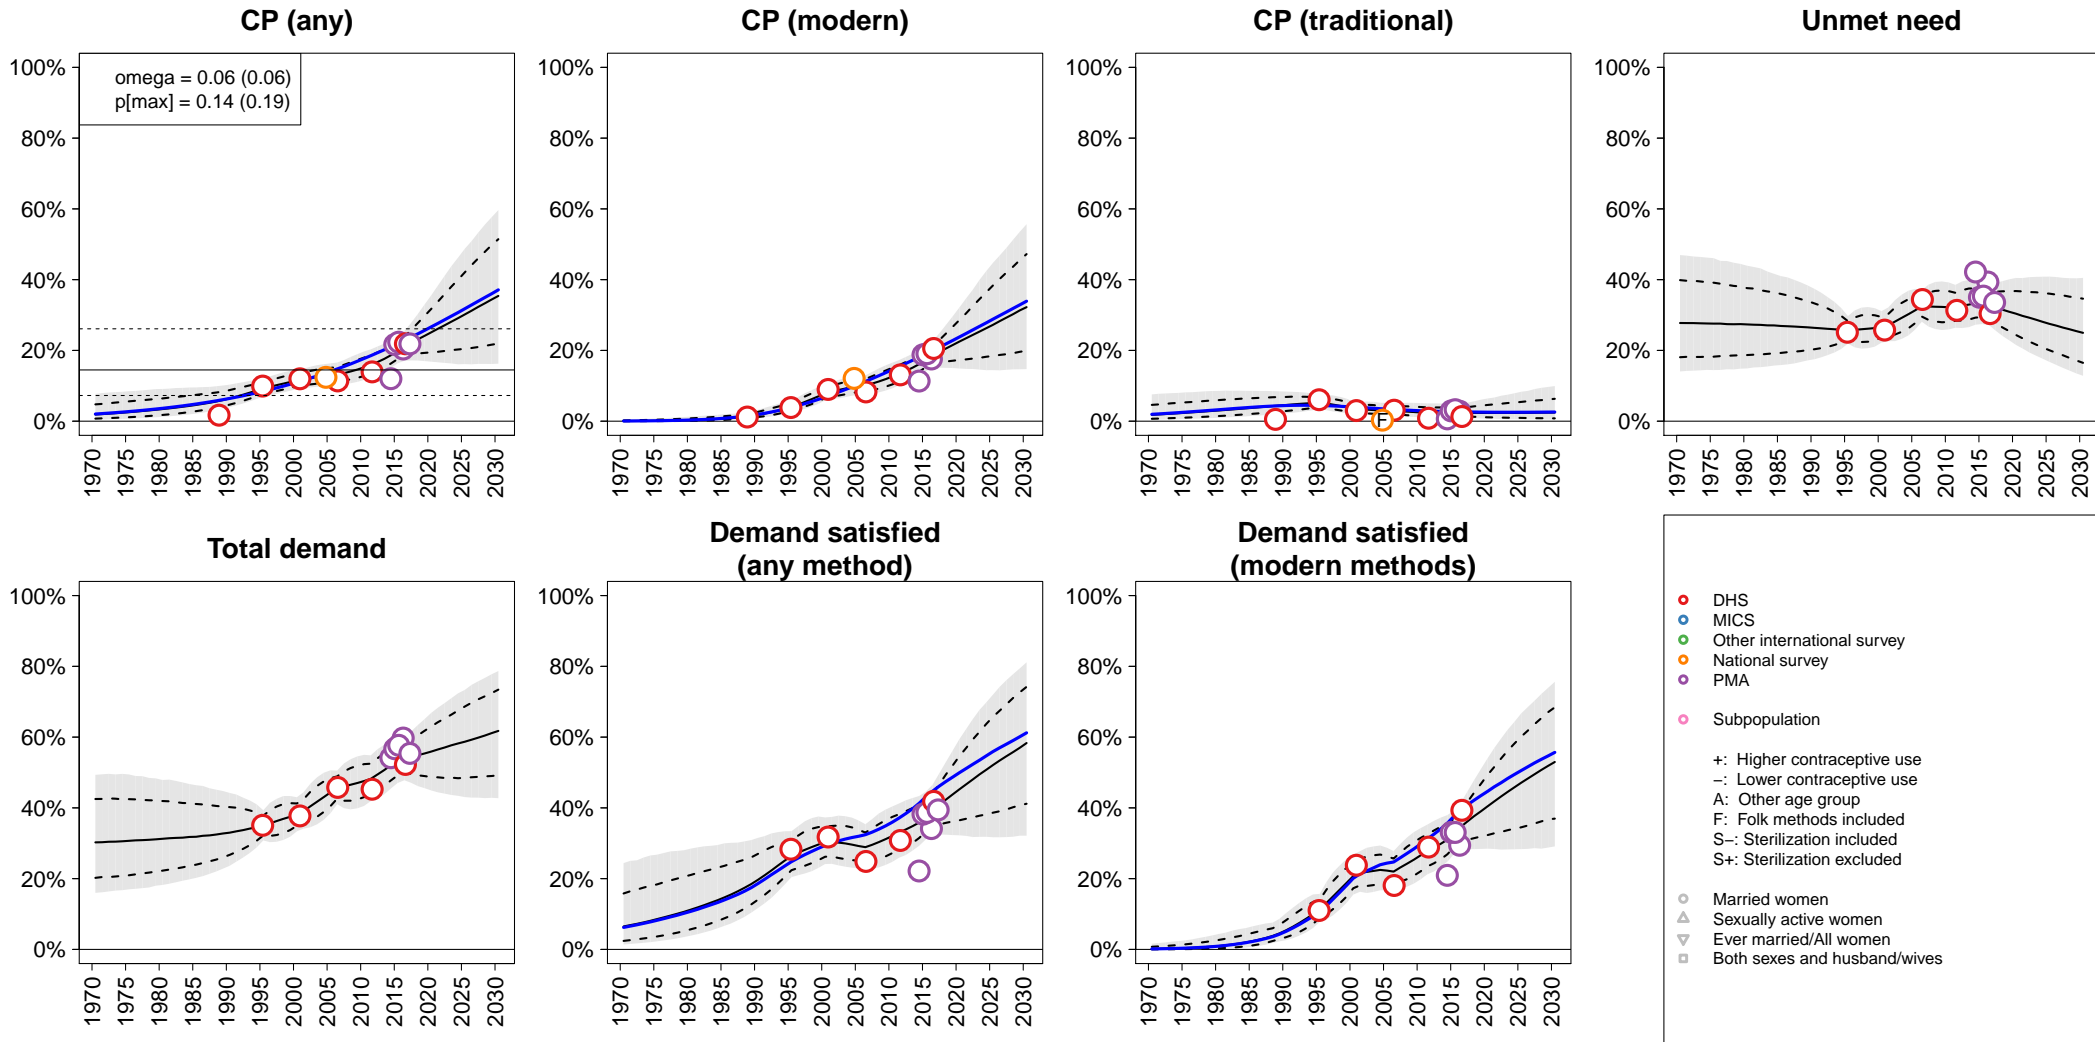

Ukraine (Eastern Europe) --- Married / In-Union

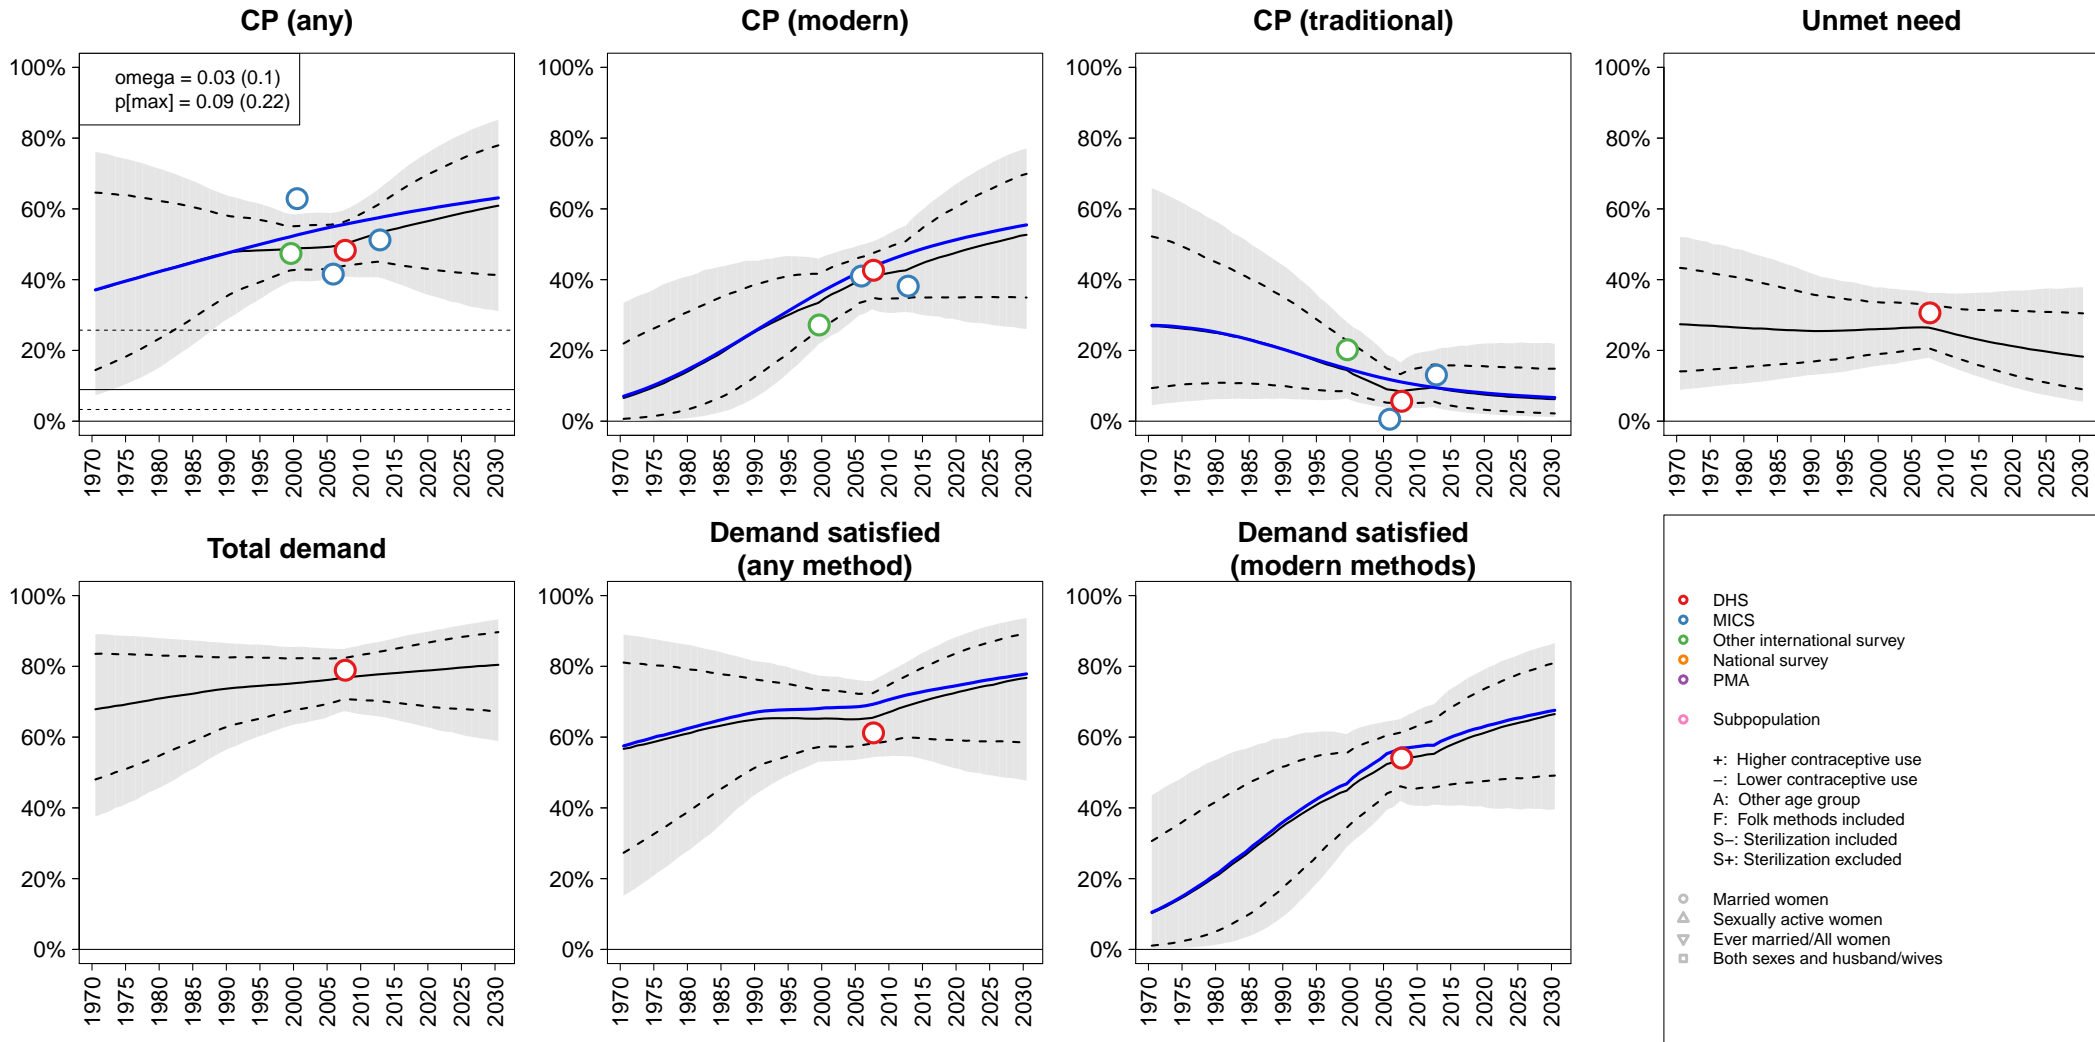



United Rep. of Tanzania (Eastern Africa) --- Married / In-Union

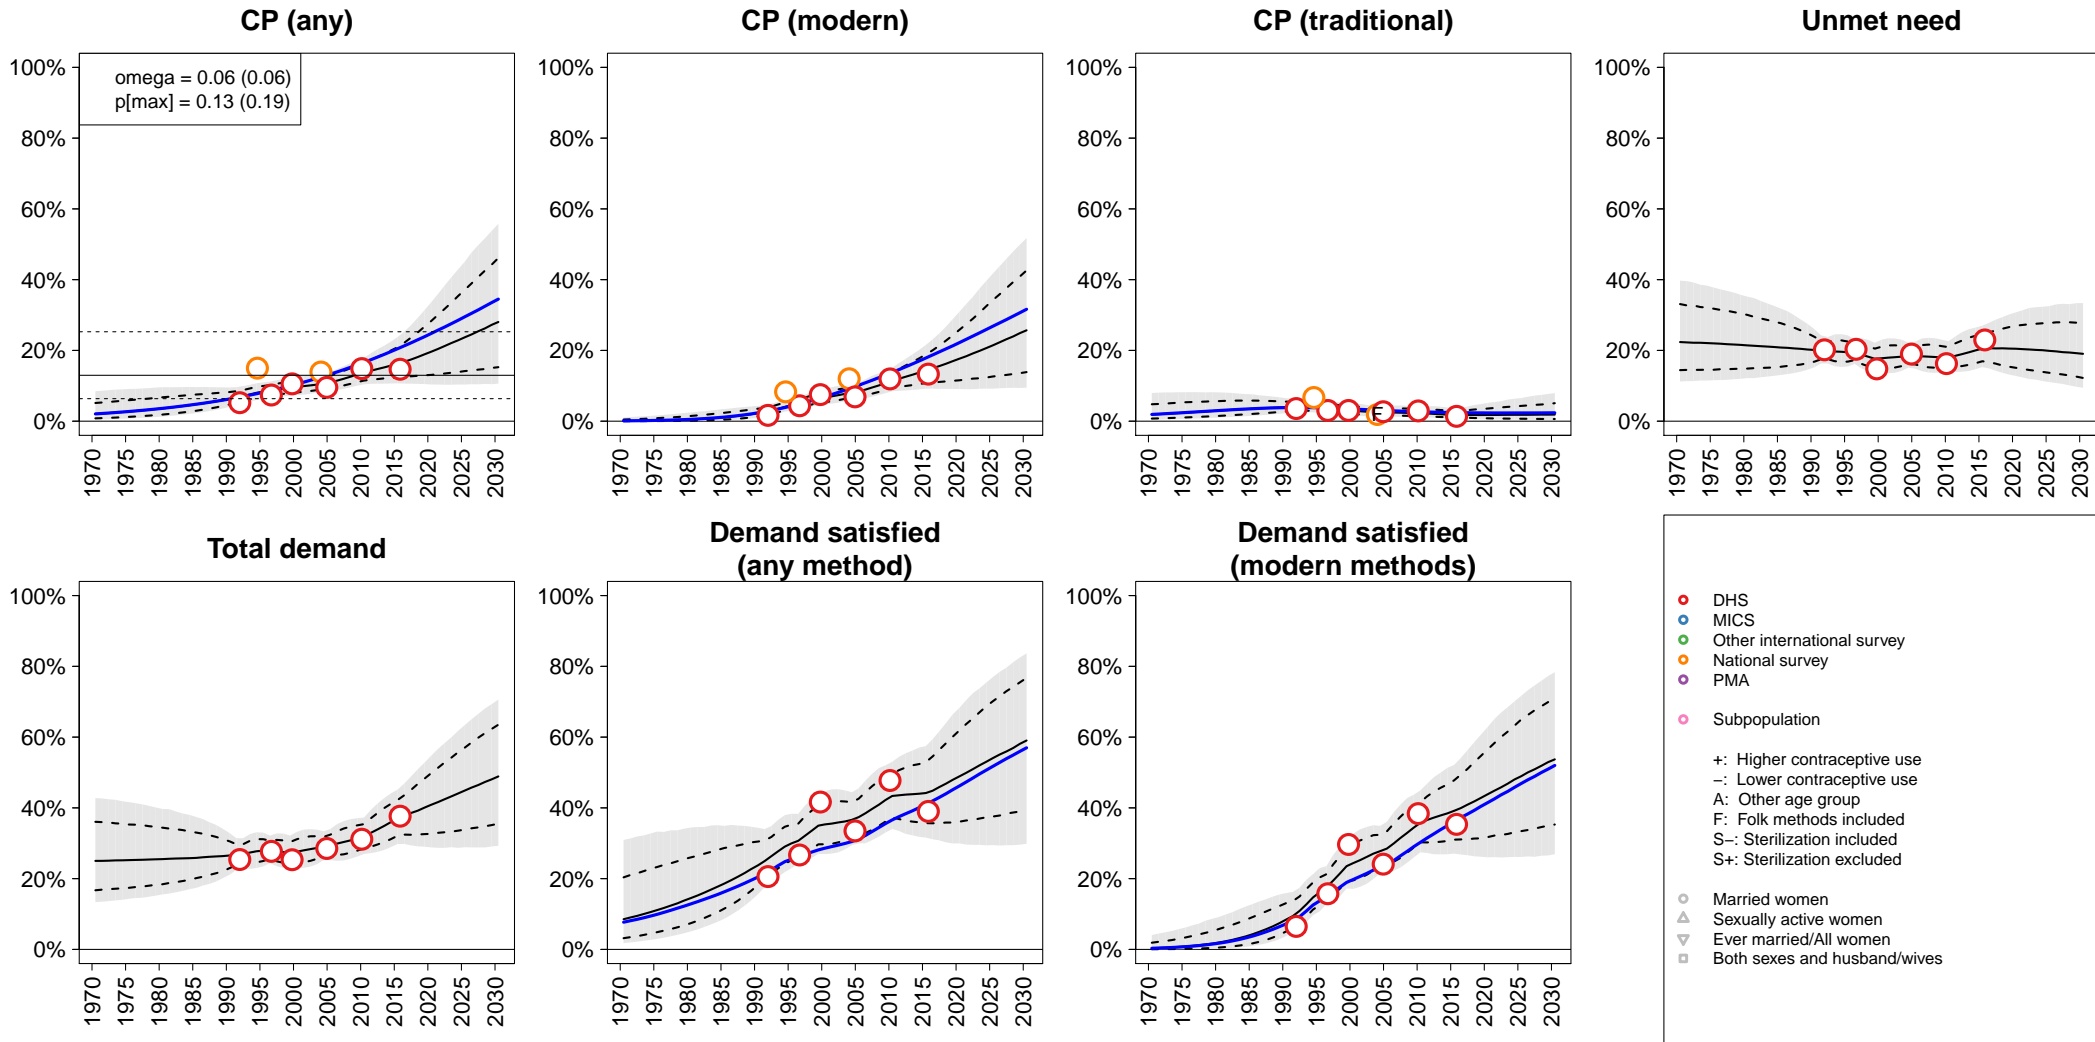

United States of America (Northern America) --- Married / In-Union

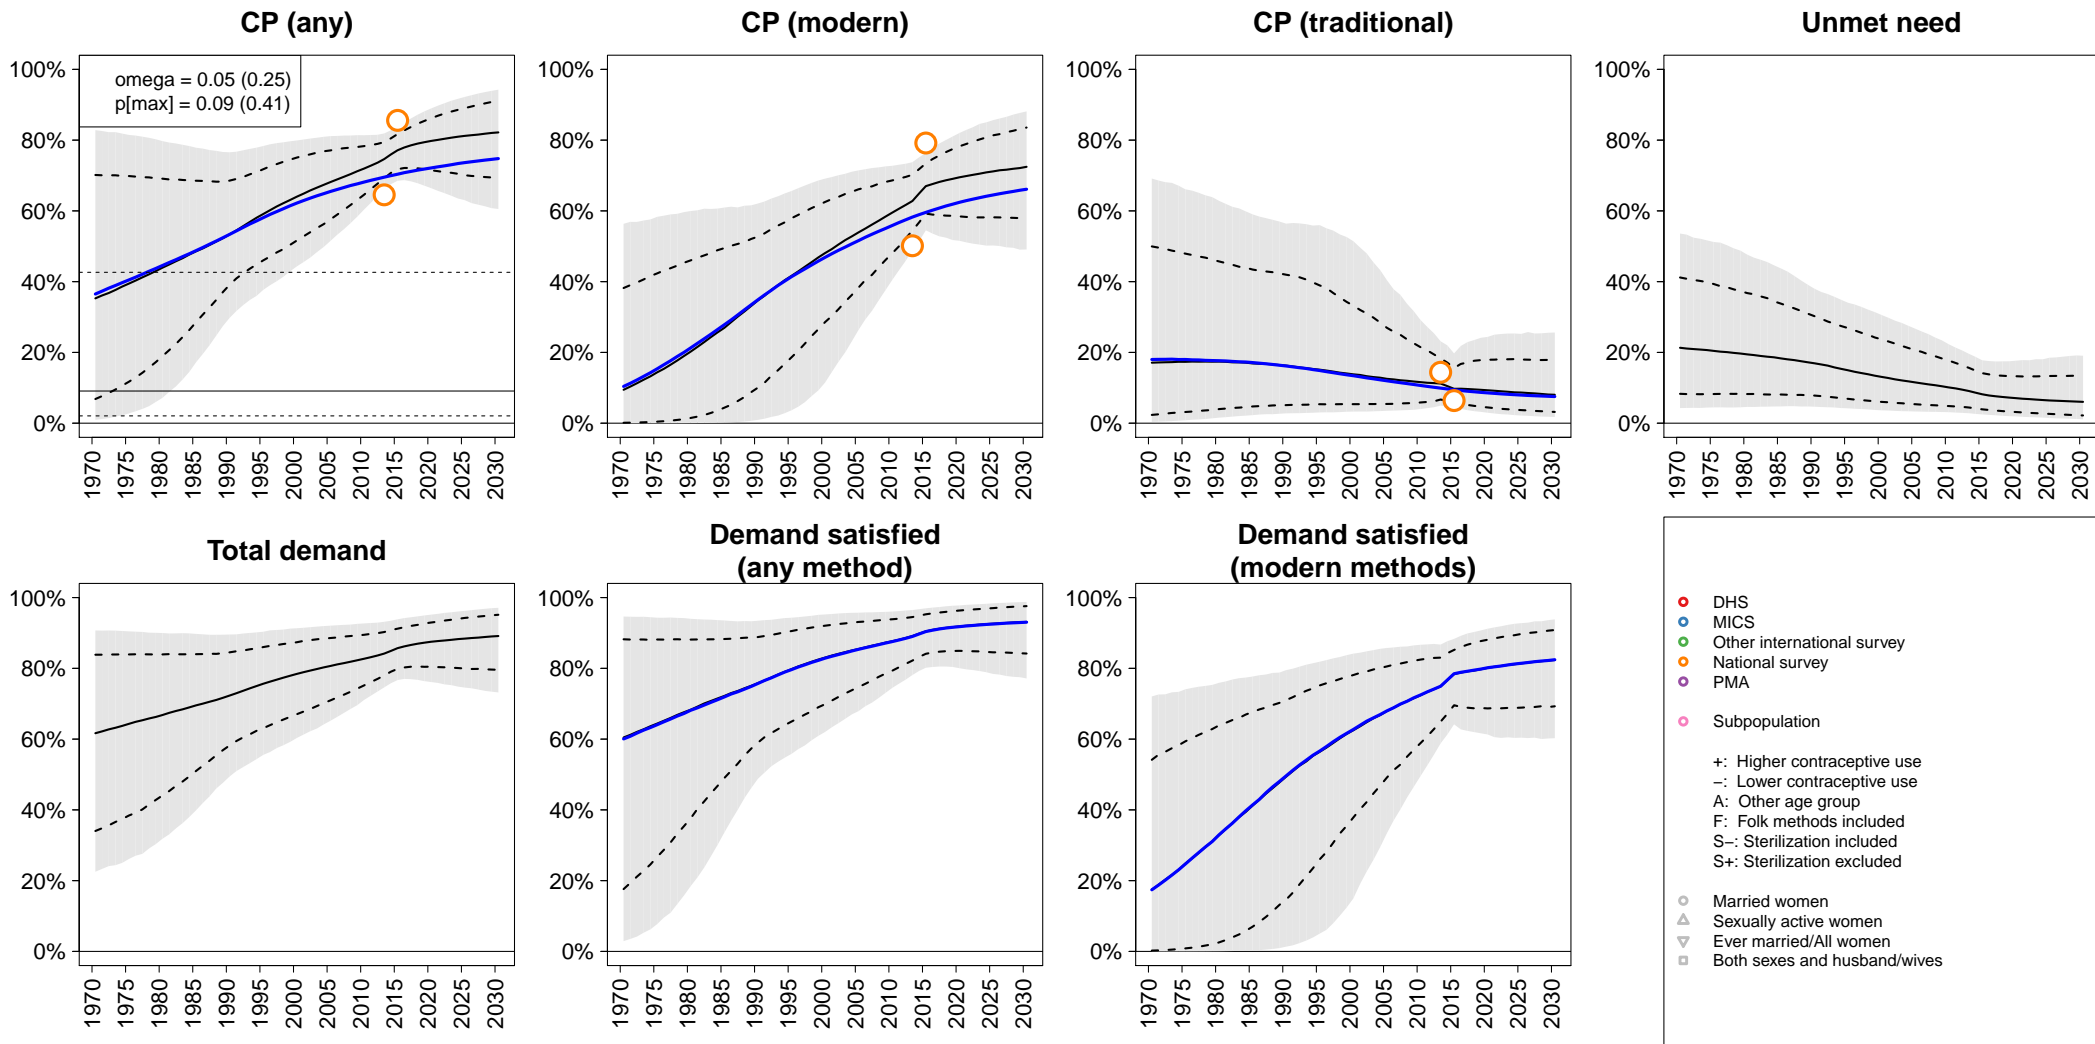

Uzbekistan (Central Asia) --- Married / In-Union

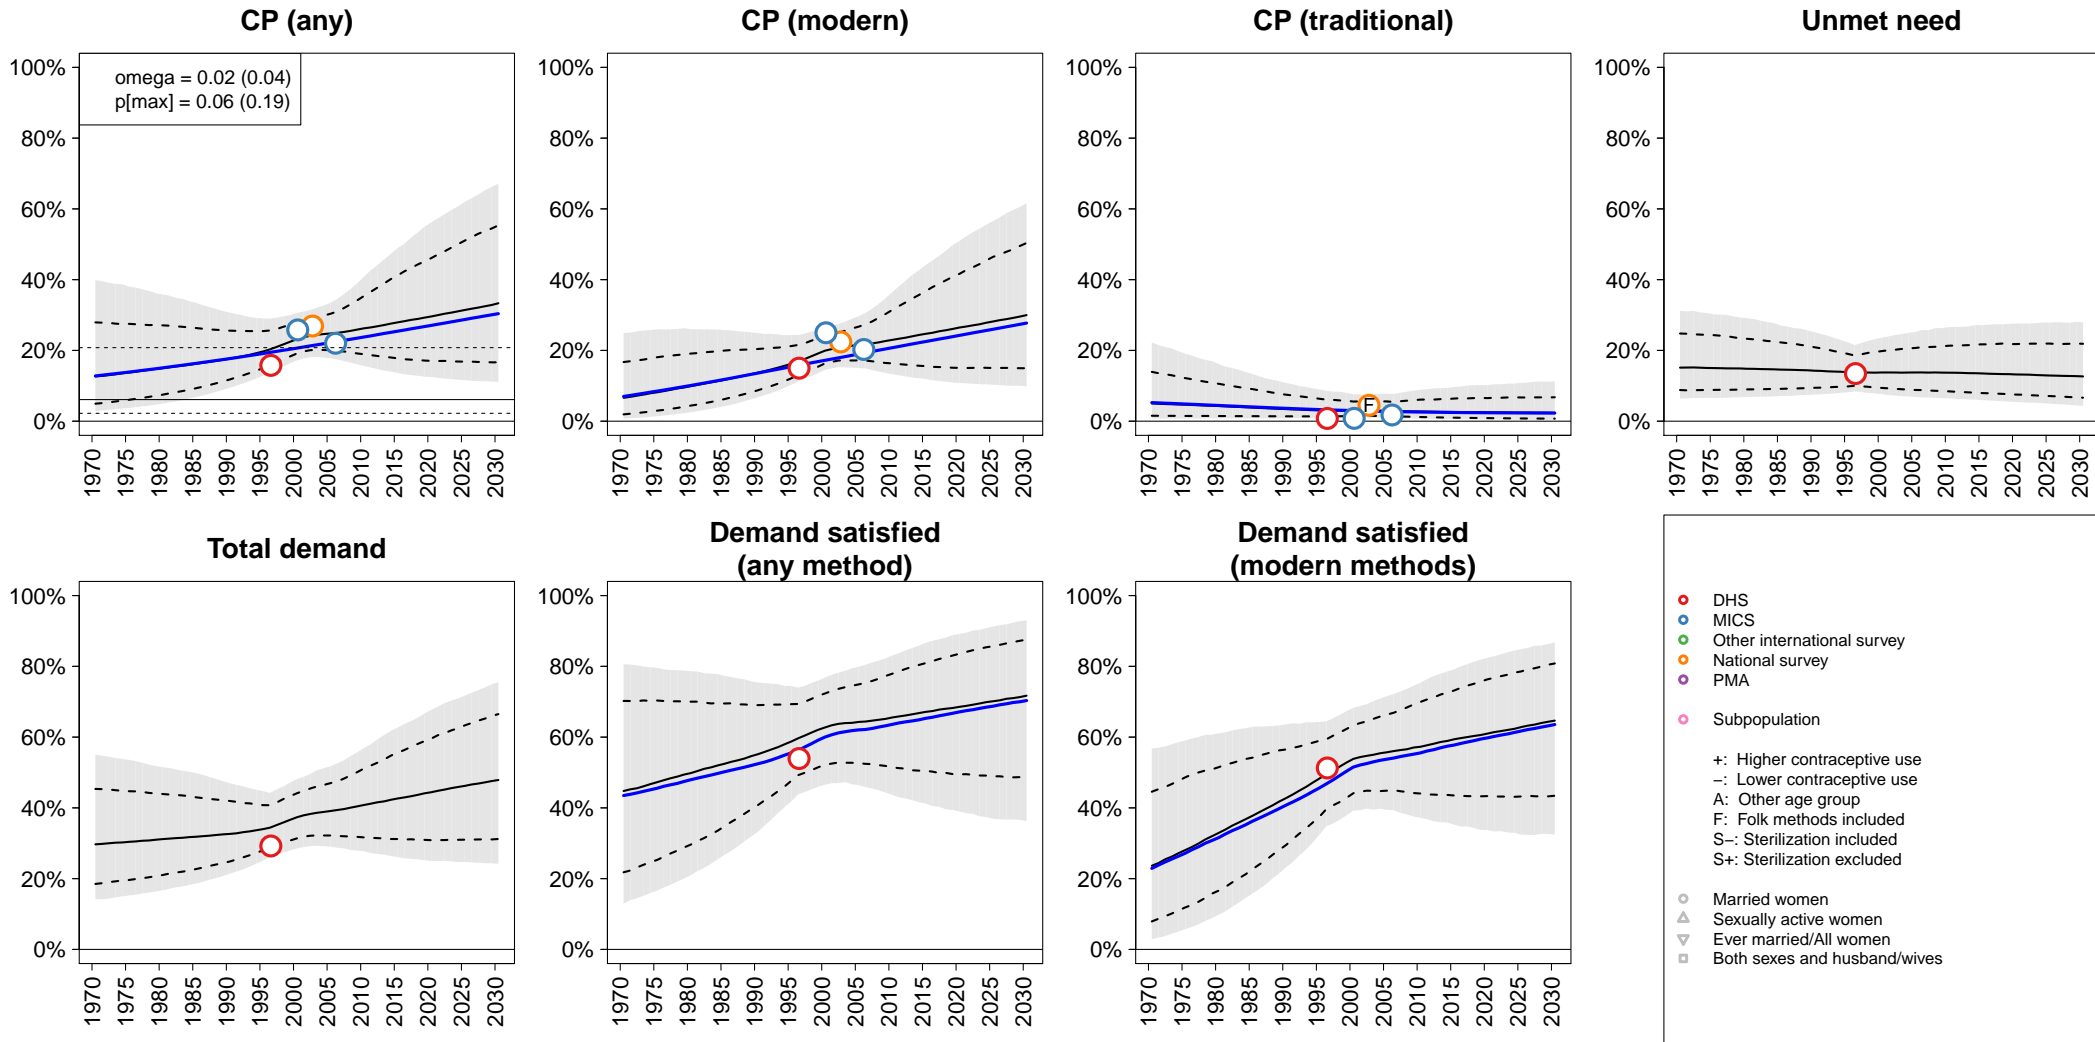

Venezuela, Bolivarian Republic of (South America) --- Married / In-Union

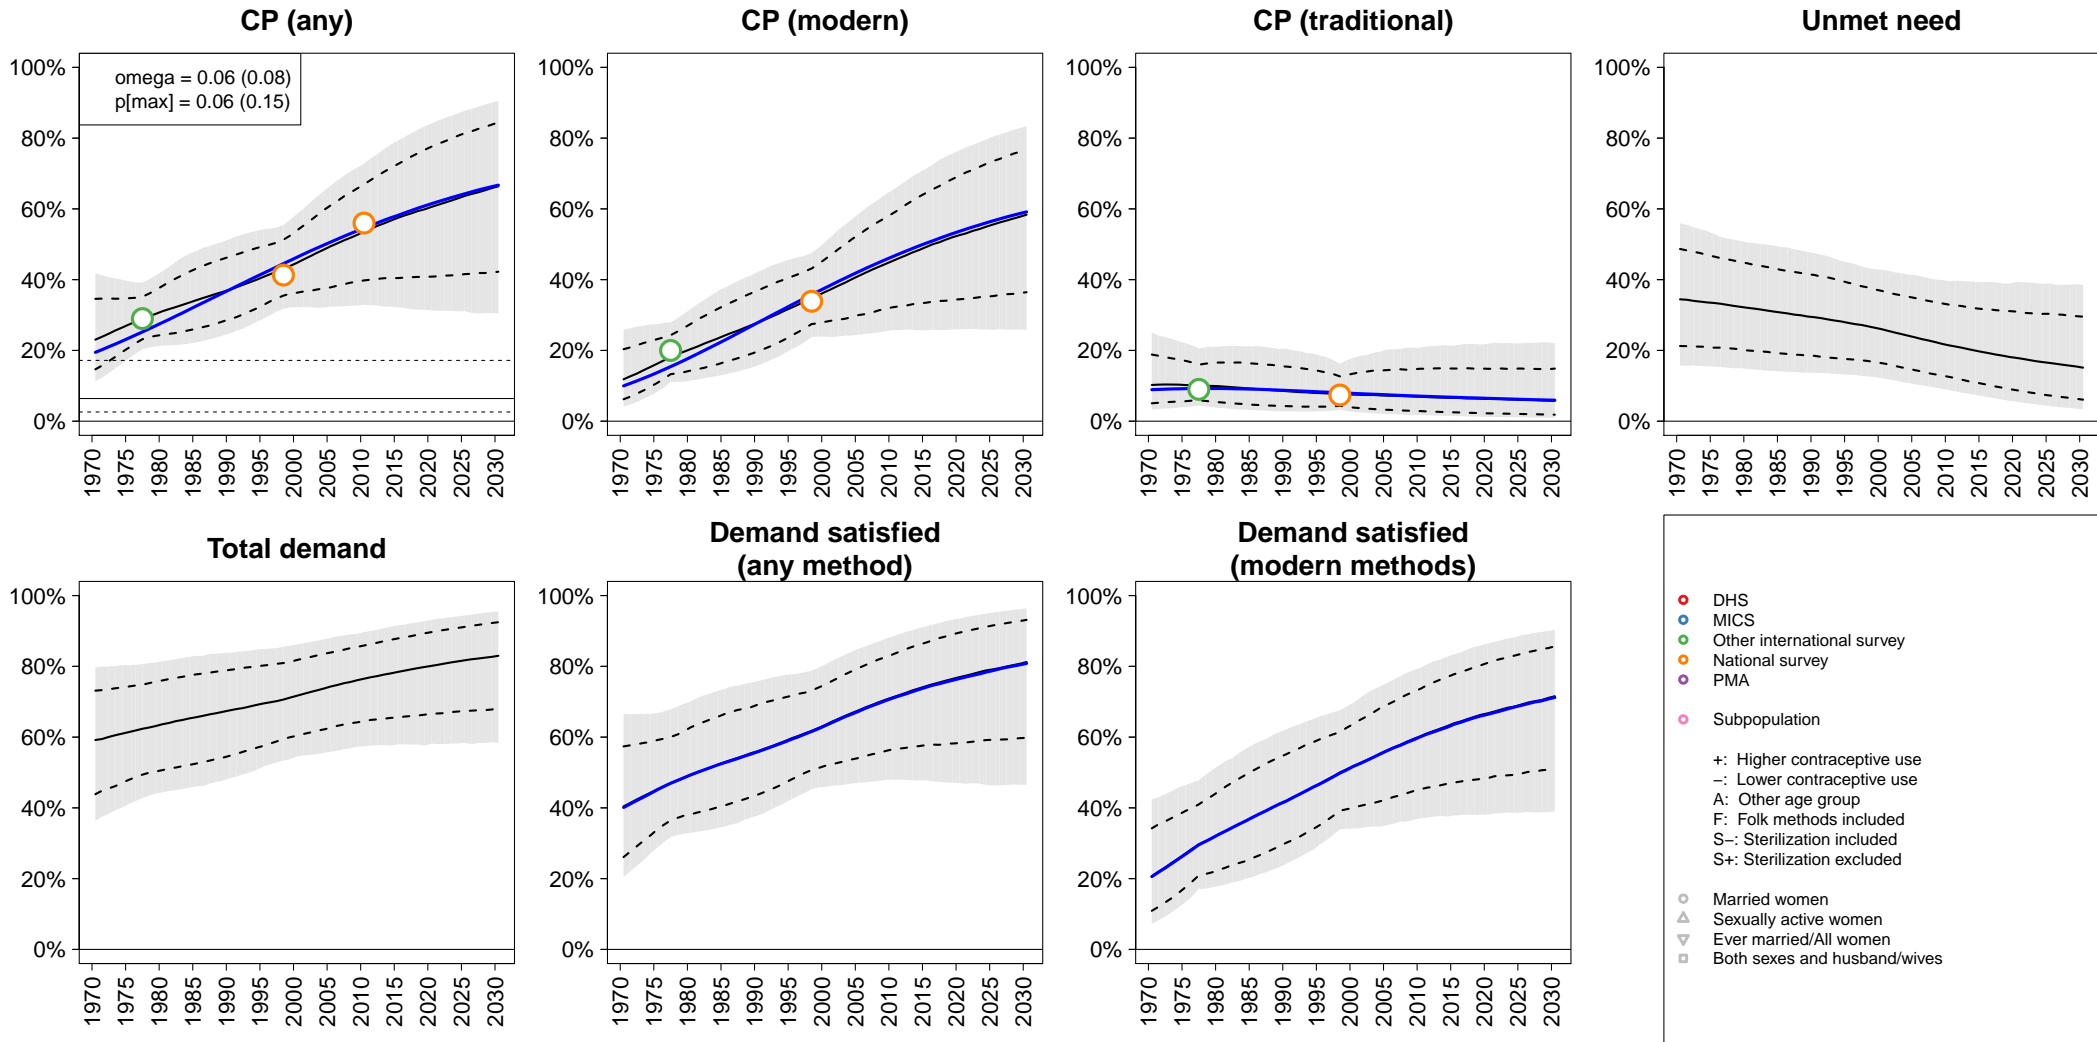

Viet Nam (South-eastern Asia) --- Married / In-Union

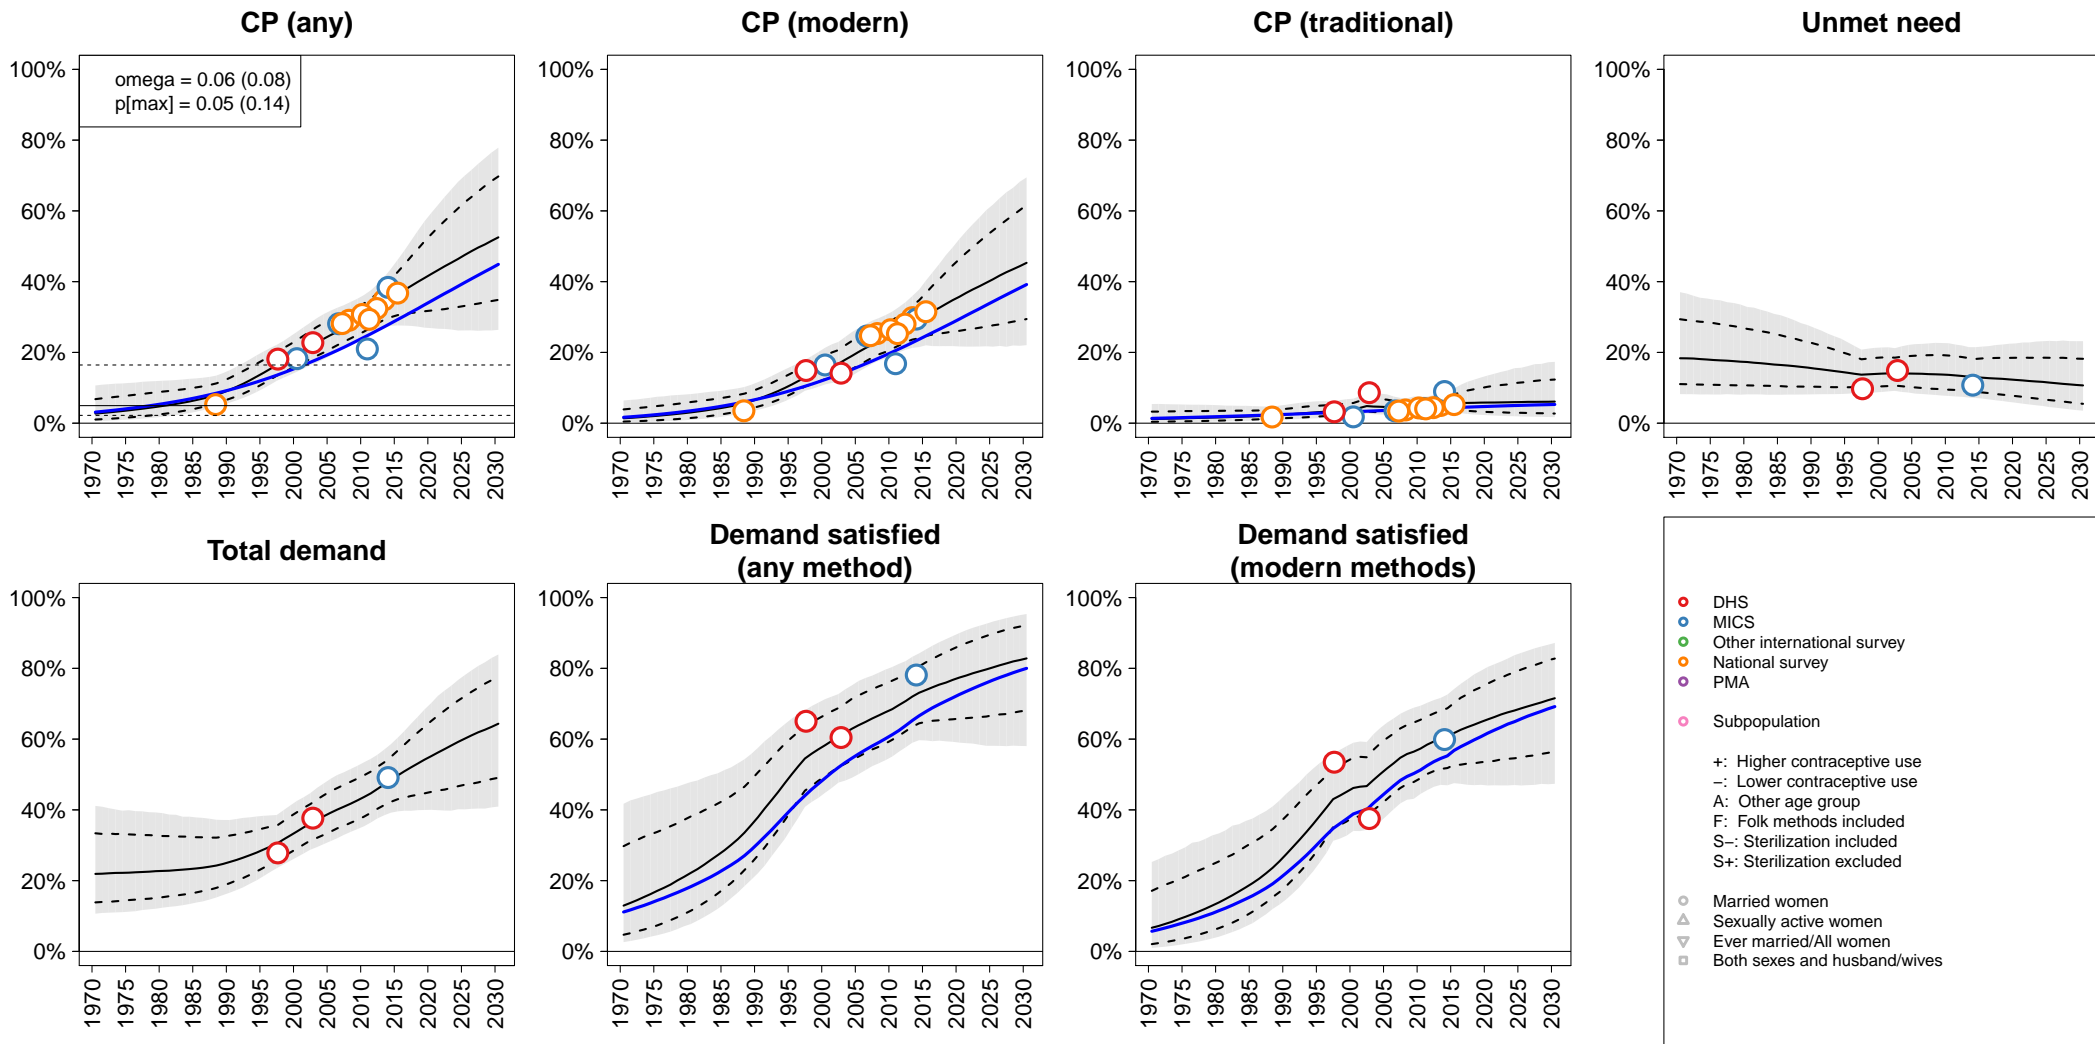

### Yemen (Western Asia) --- Married / In-Union

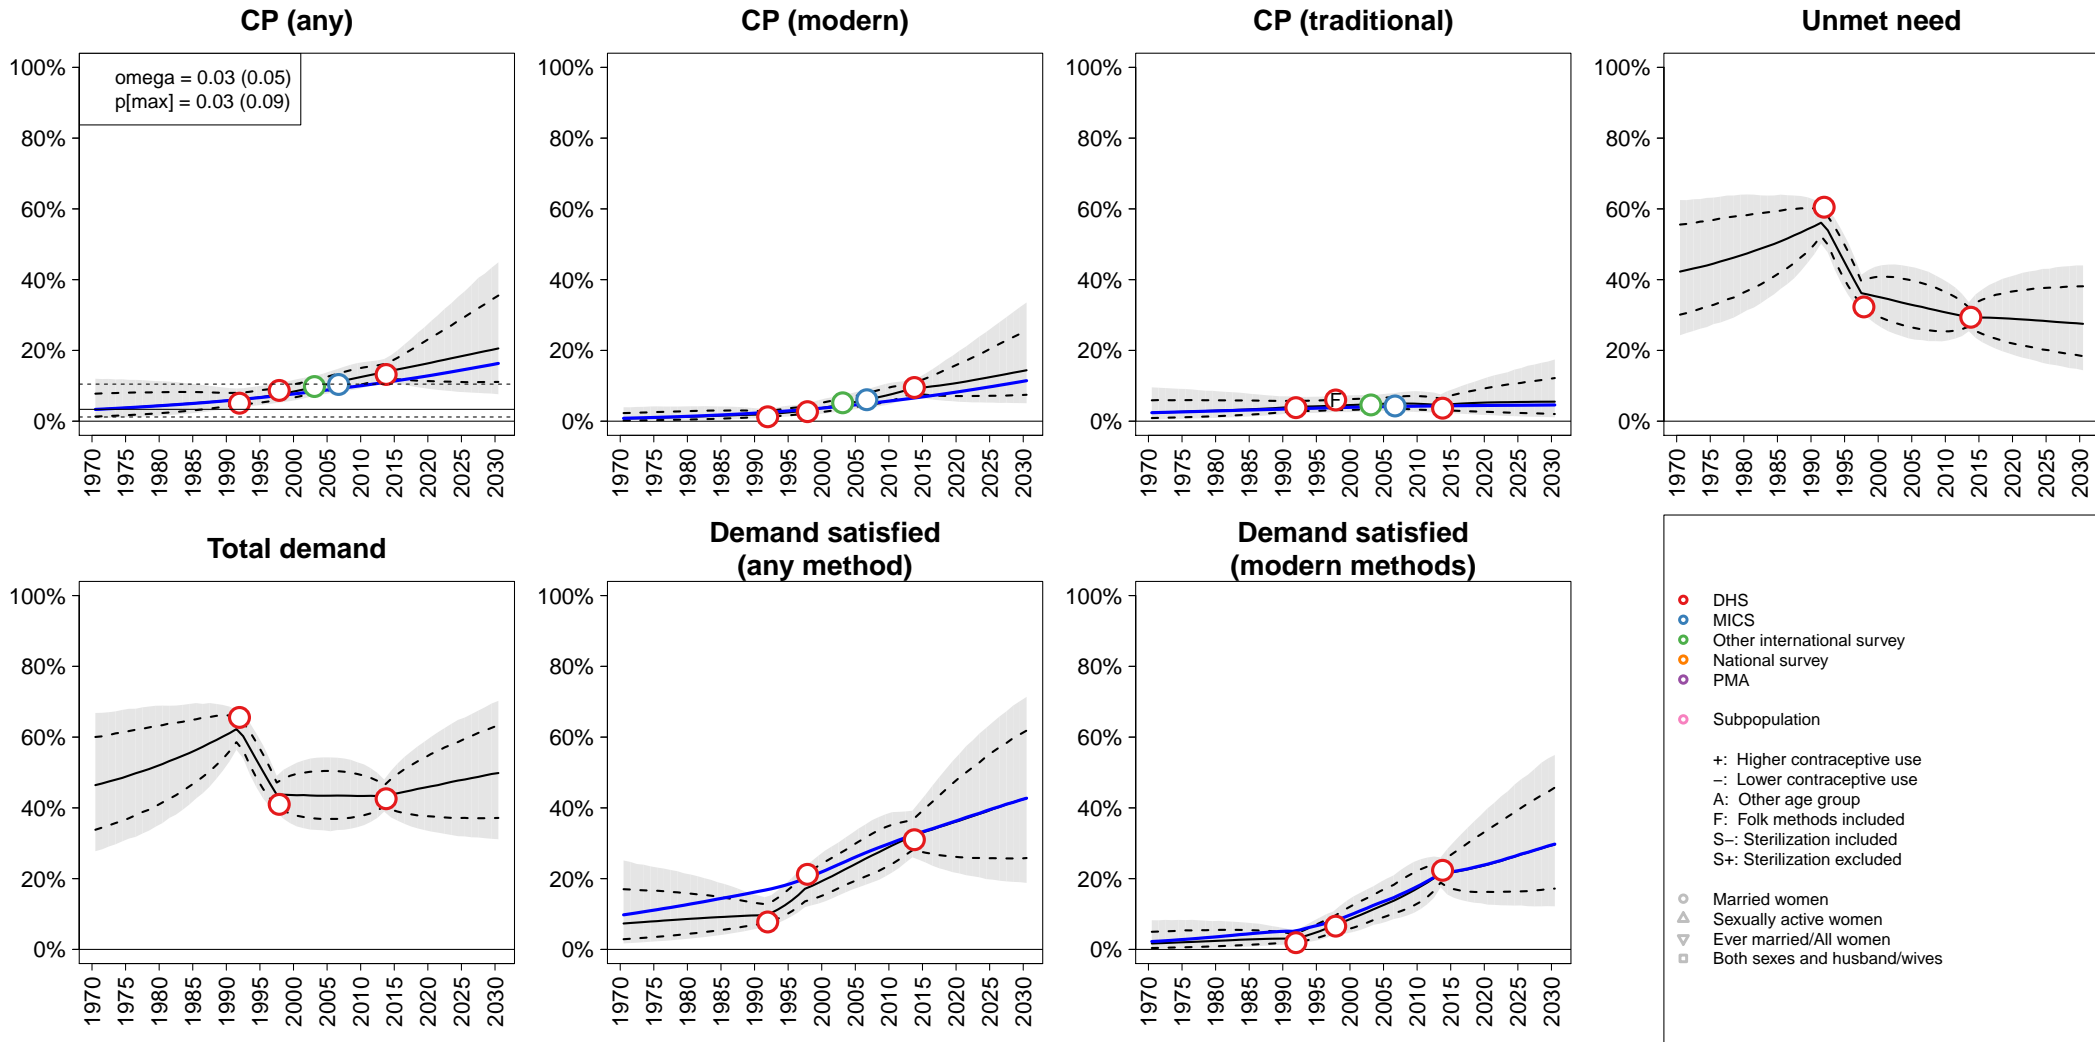

Zambia (Eastern Africa) --- Married / In-Union

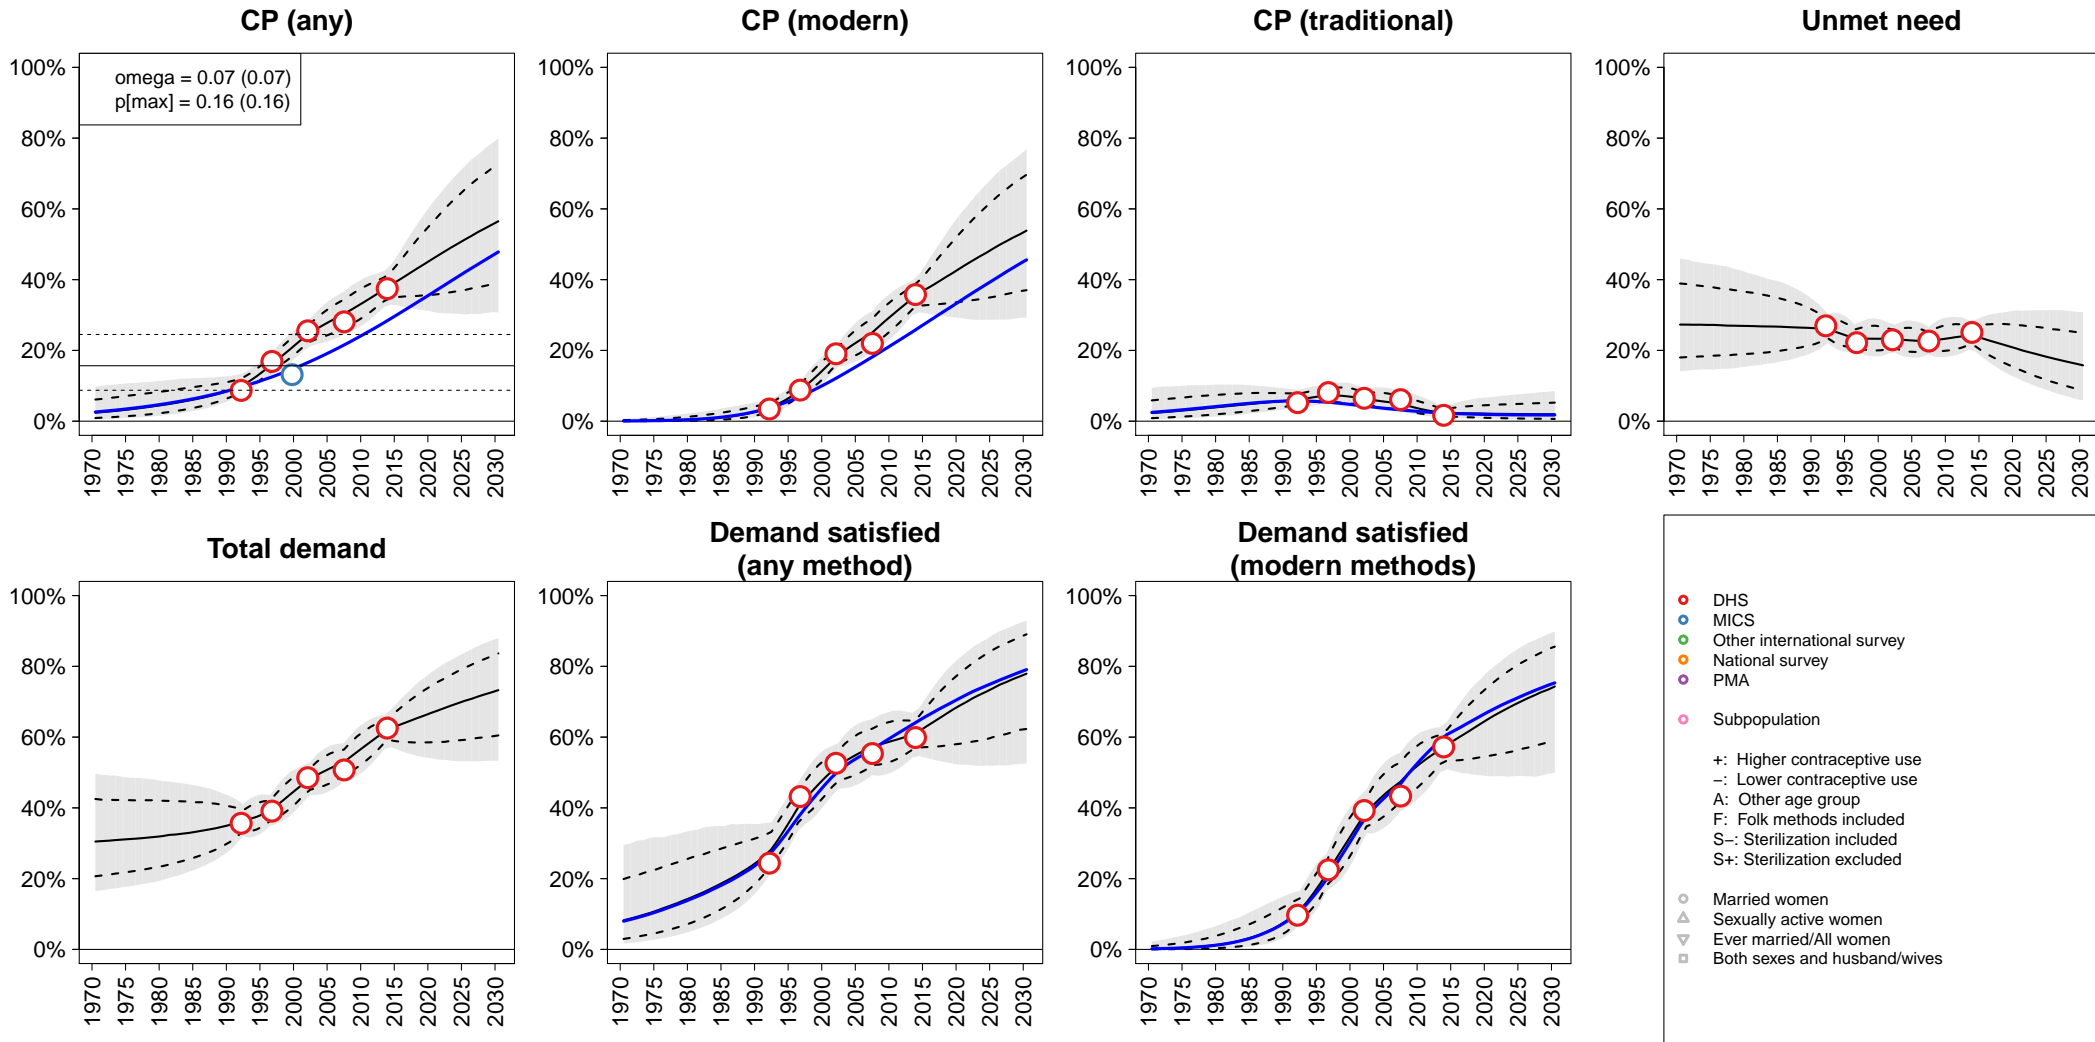

Zimbabwe (Eastern Africa) --- Married / In-Union

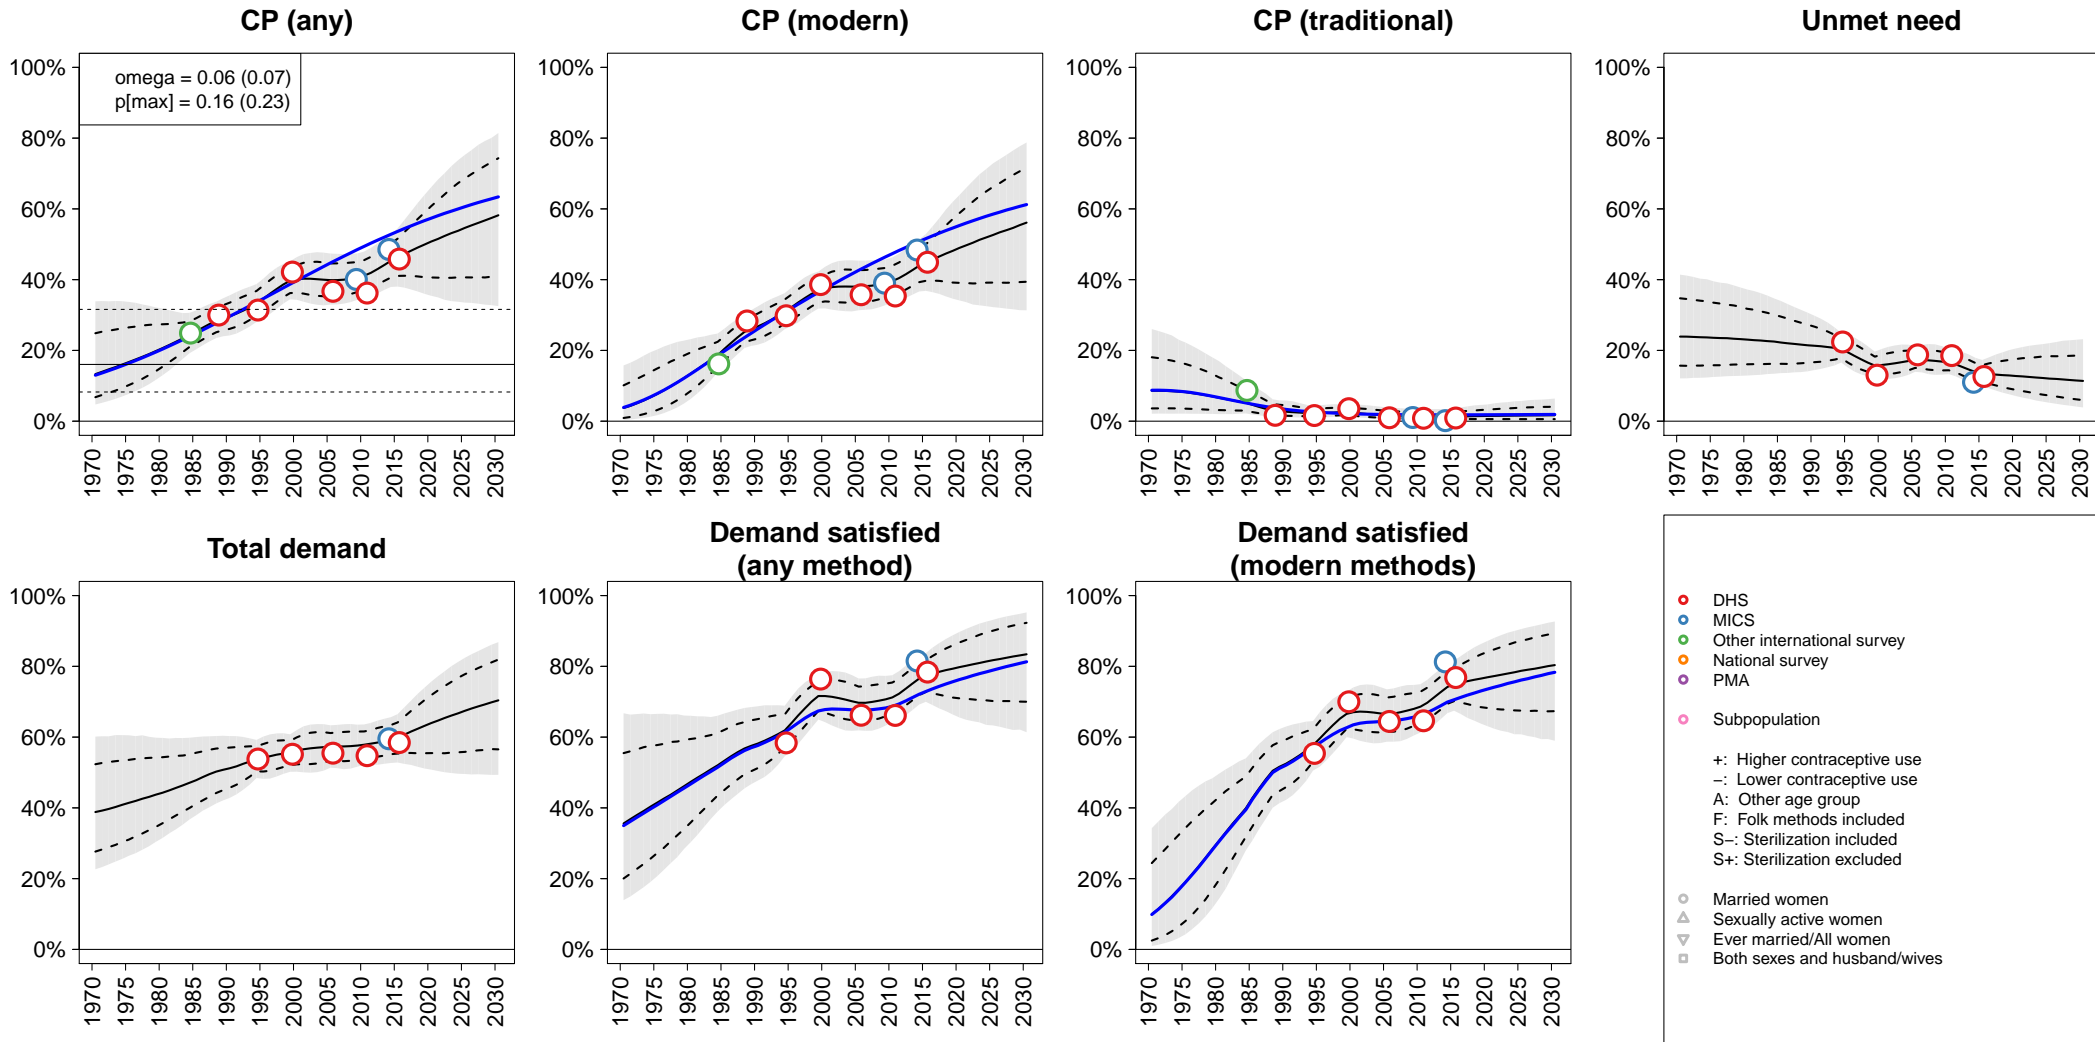



### 1.3 All Adolescent Women

Albania --- All women

CP (any)

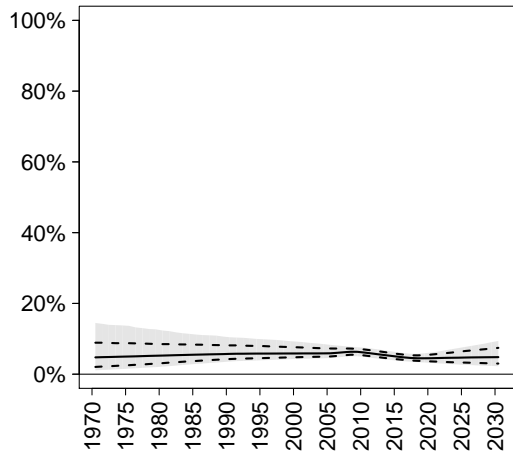

CP (modern)

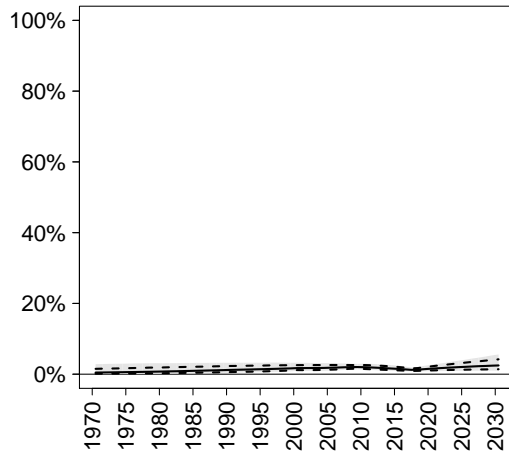

CP (traditional)

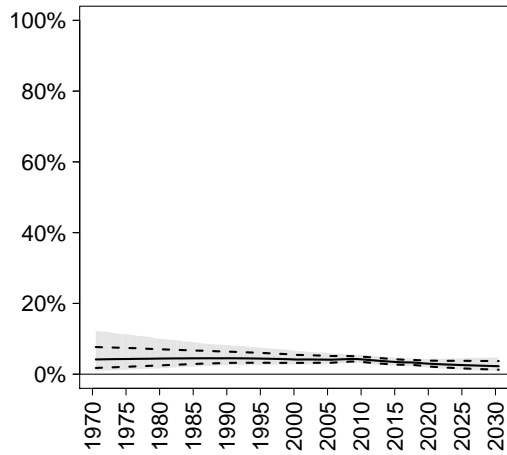

Unmet need among all unmarried women

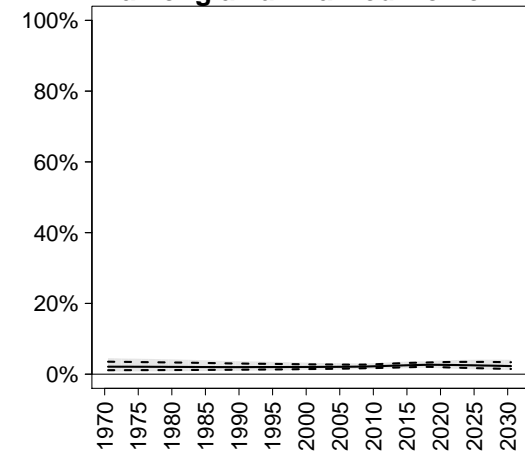

Total demand

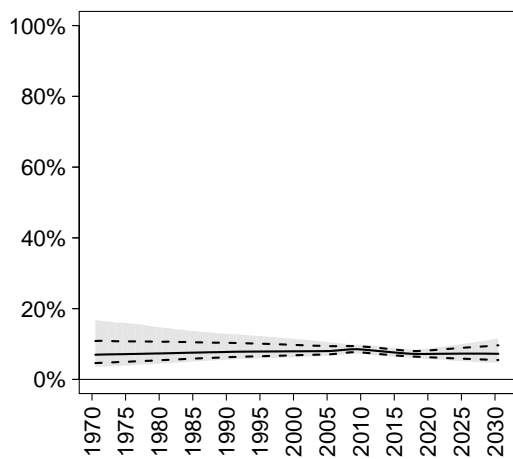

Demand satisfied (any method)

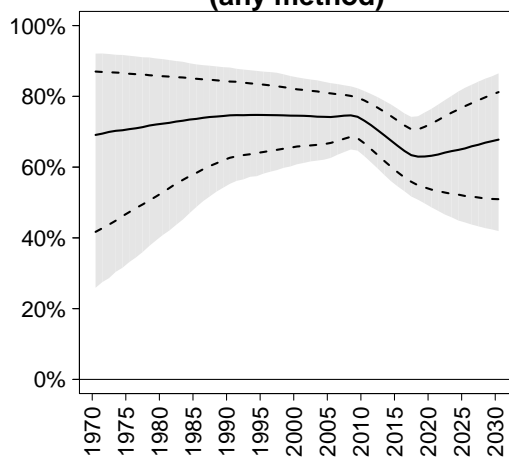

Demand satisfied (modern methods)

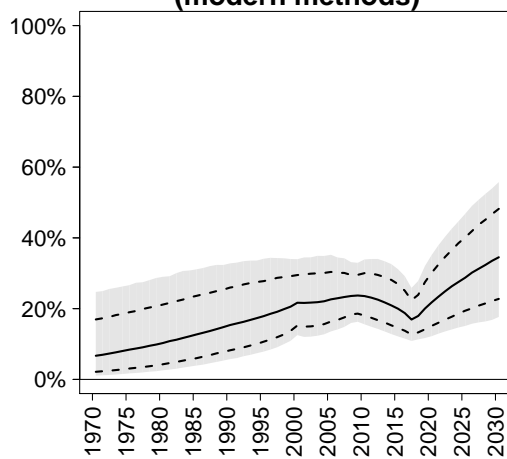

Angola --- All women

**CP (any)**

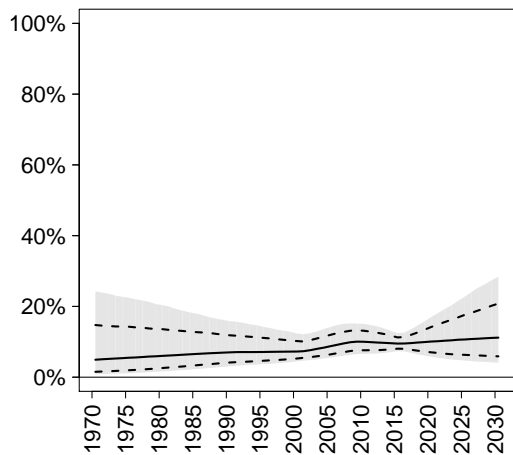

**CP (modern)**

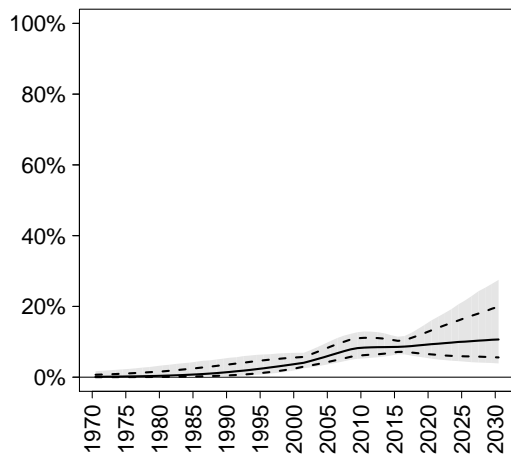

**CP (traditional)**

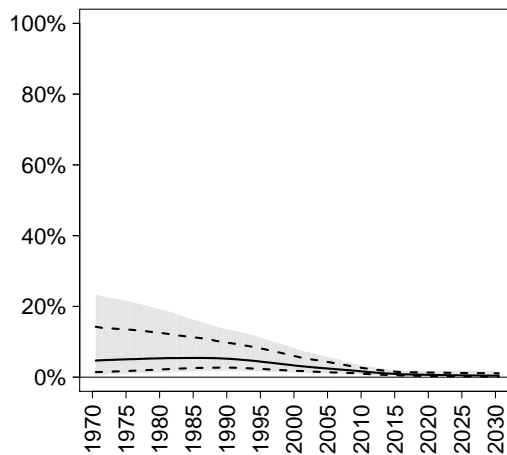

**Unmet need among all unmarried women**

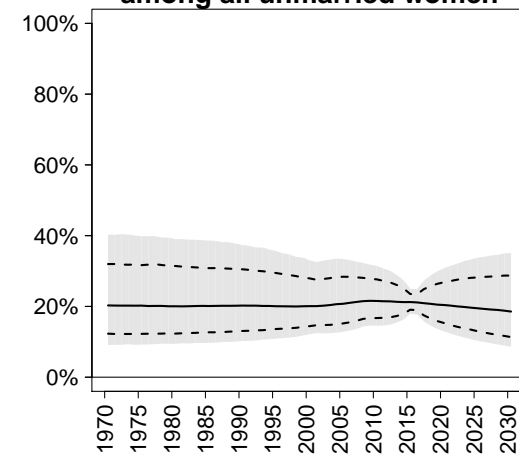

**Total demand**

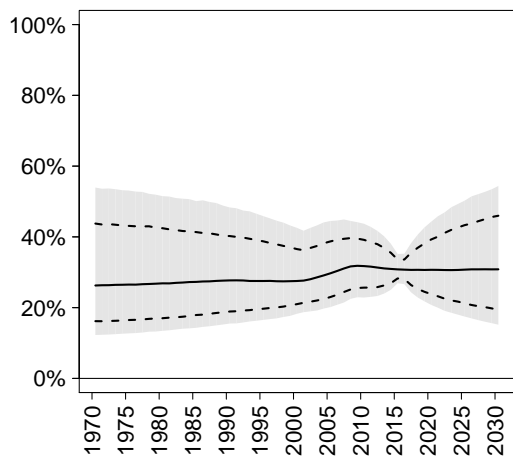

**Demand satisfied (any method)**

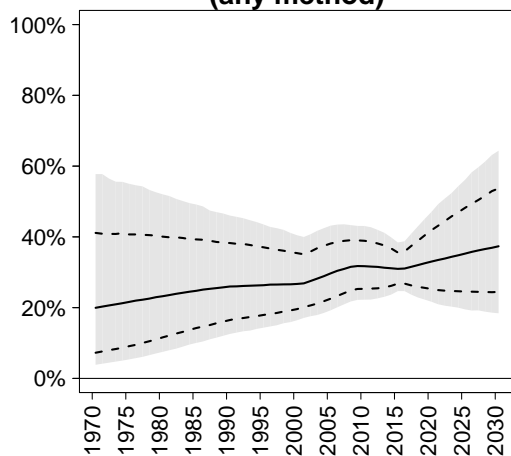

**Demand satisfied (modern methods)**

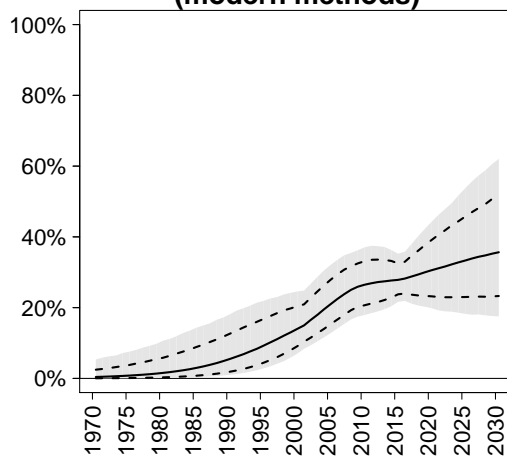

Armenia --- All women

CP (any)

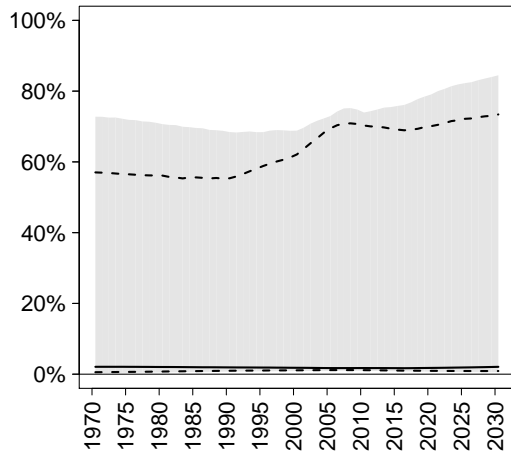

CP (modern)

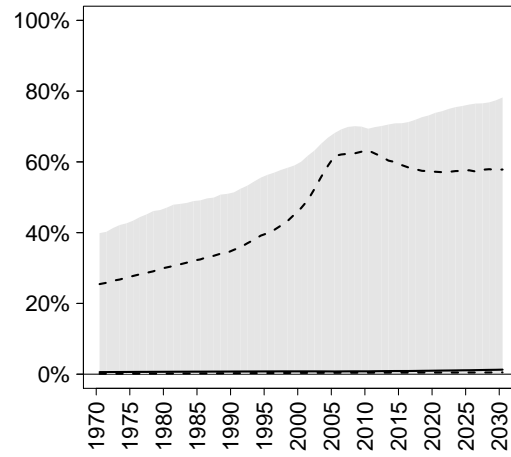

CP (traditional)

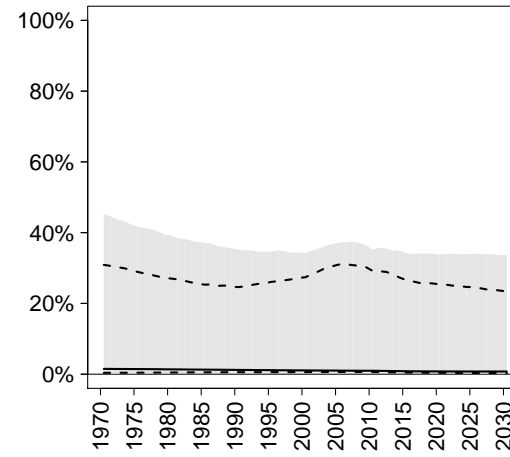

Unmet need among all unmarried women

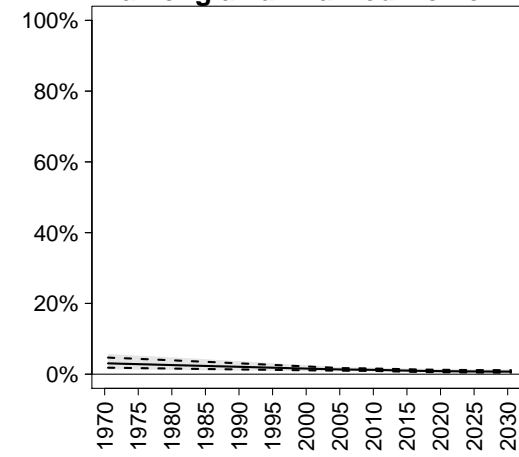

Total demand

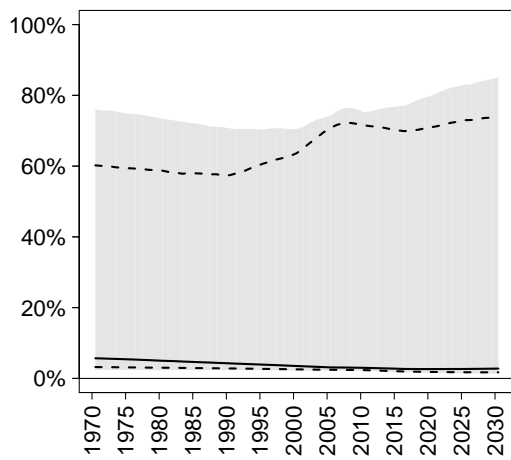

Demand satisfied (any method)

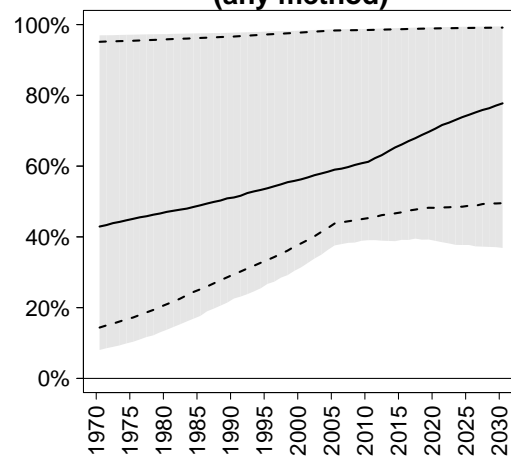

Demand satisfied (modern methods)

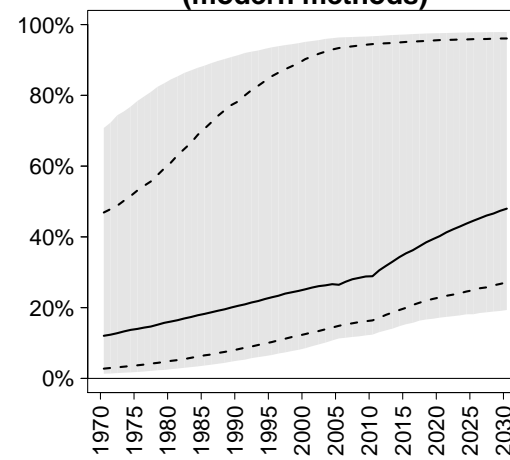

Barbados --- All women

CP (any)

CP (modern)

CP (traditional)

Unmet need among all unmarried women

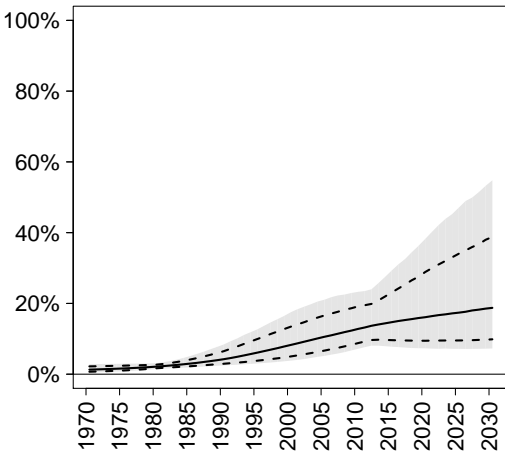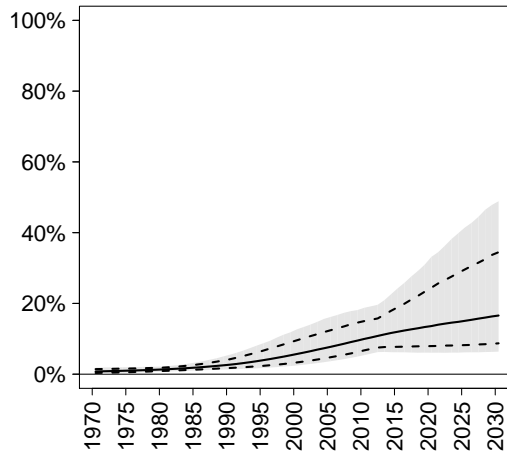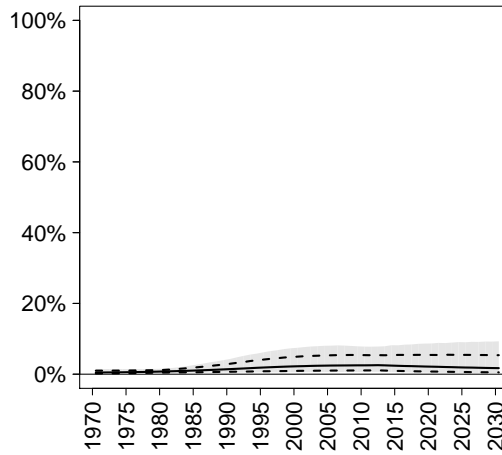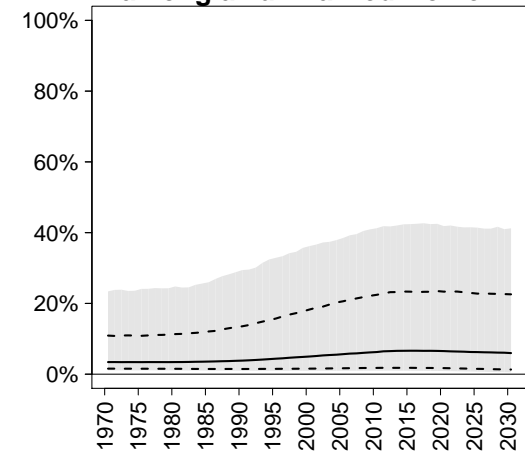

Total demand

Demand satisfied (any method)

Demand satisfied (modern methods)

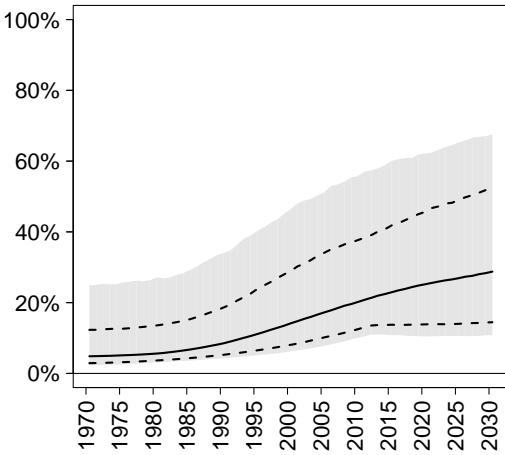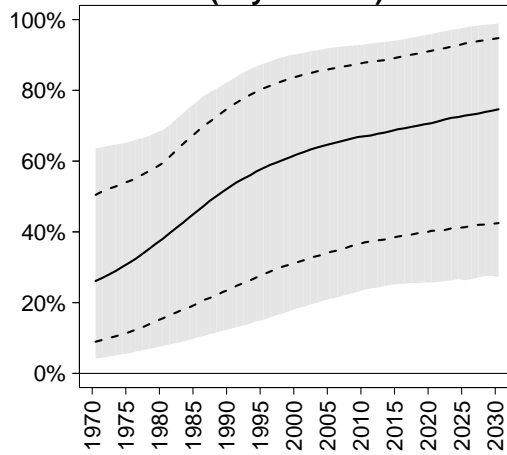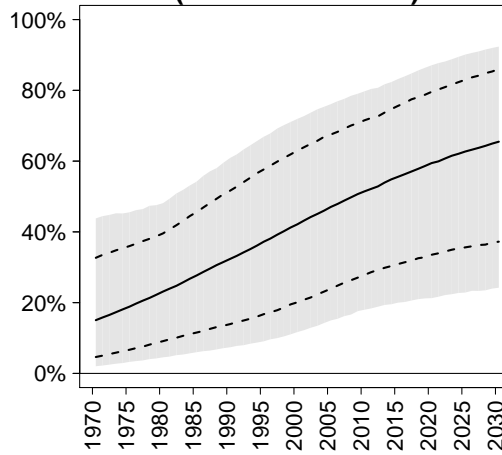

Benin --- All women

CP (any)

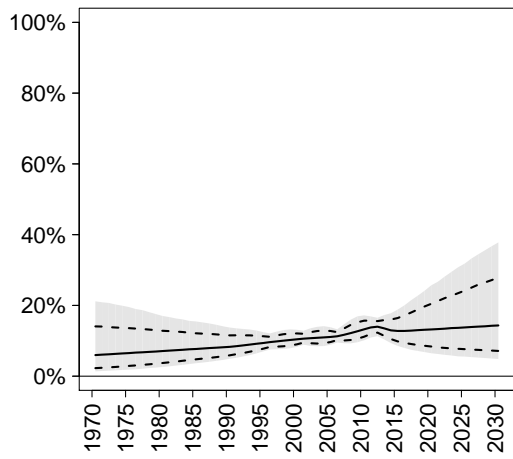

CP (modern)

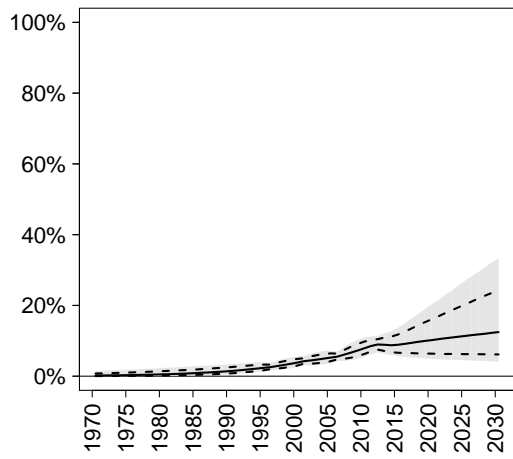

CP (traditional)

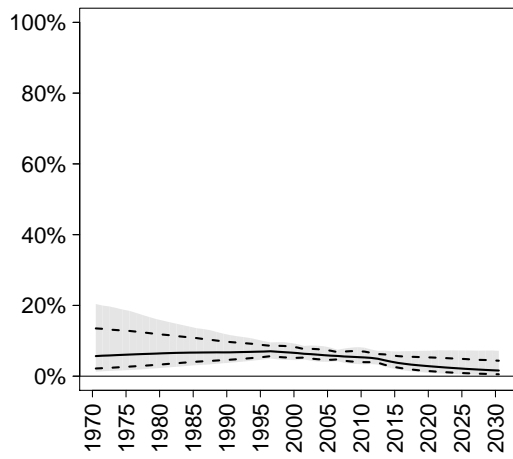

Unmet need among all unmarried women

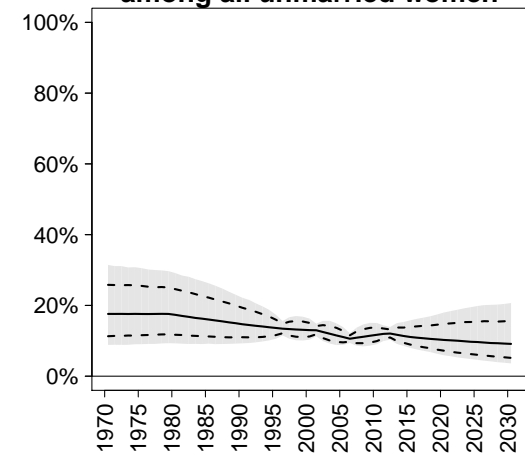

Total demand

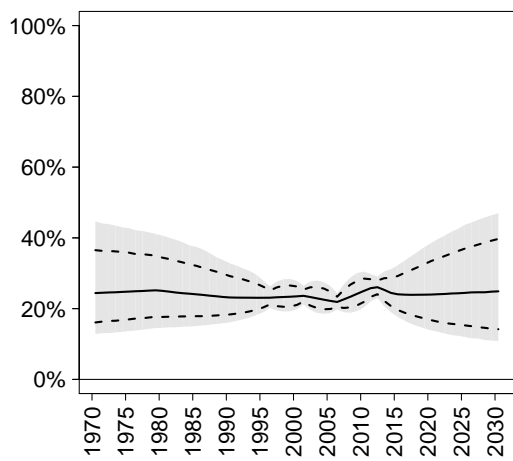

Bolivia (Plurinational State of) --- All women

CP (any)

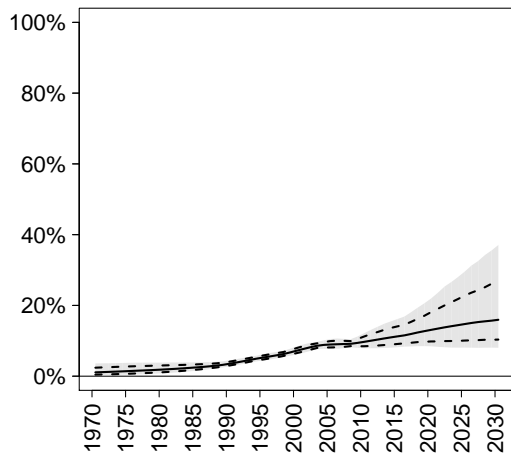

CP (modern)

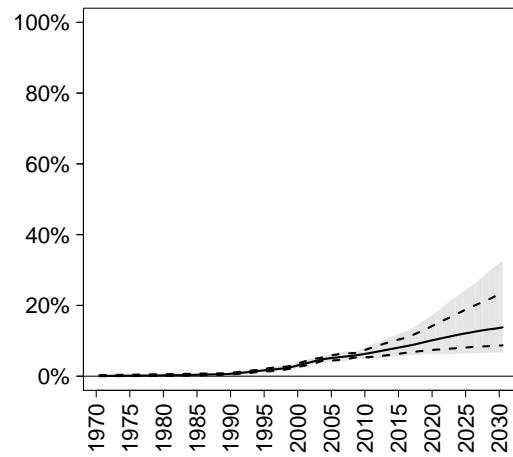

CP (traditional)

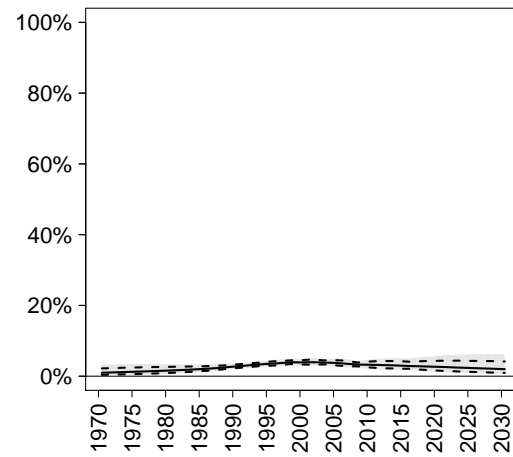

Unmet need among all unmarried women

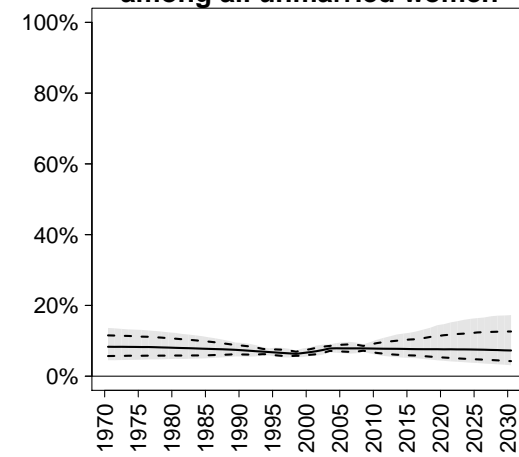

Total demand

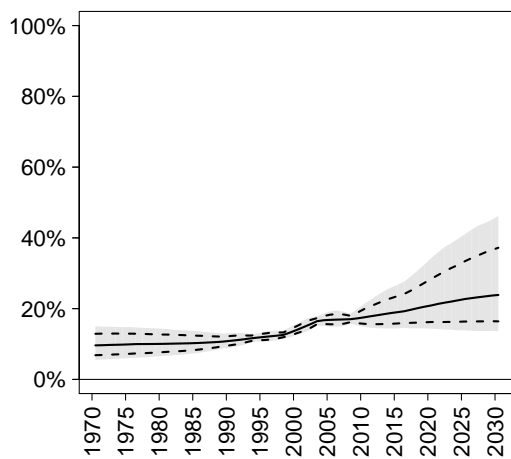

Bosnia and Herzegovina --- All women

**CP (any)**

**CP (modern)**

**CP (traditional)**

**Unmet need among all unmarried women**

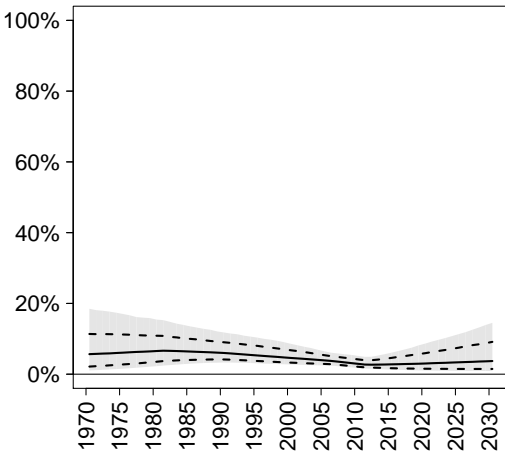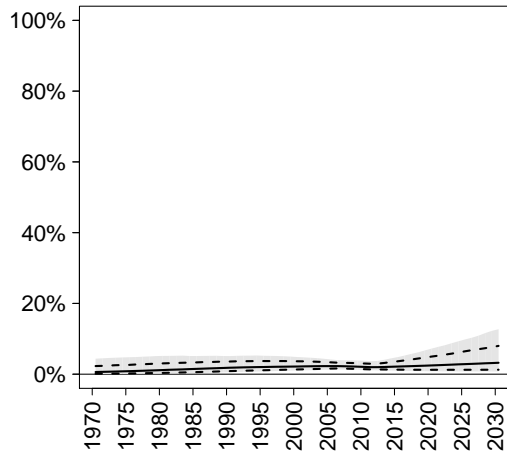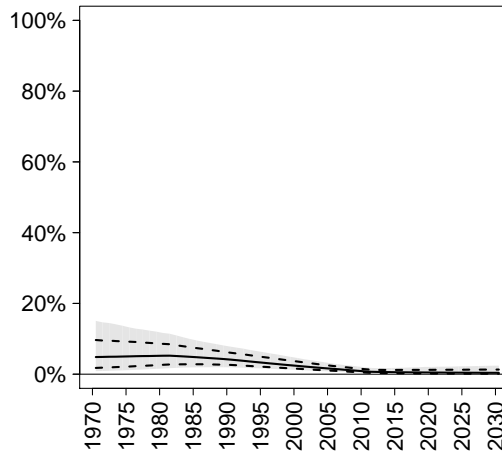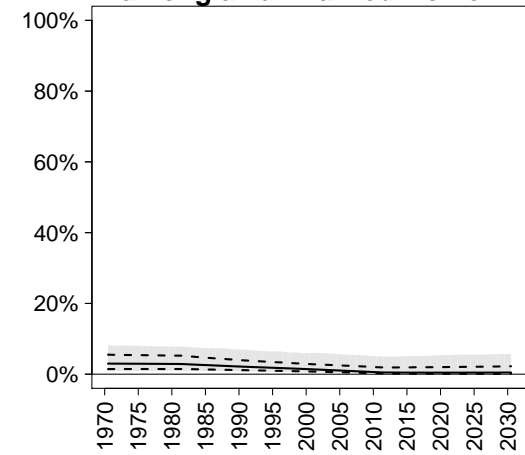

**Total demand**

**Demand satisfied (any method)**

**Demand satisfied (modern methods)**

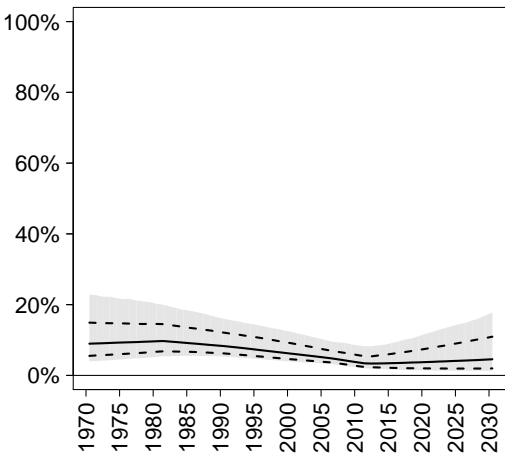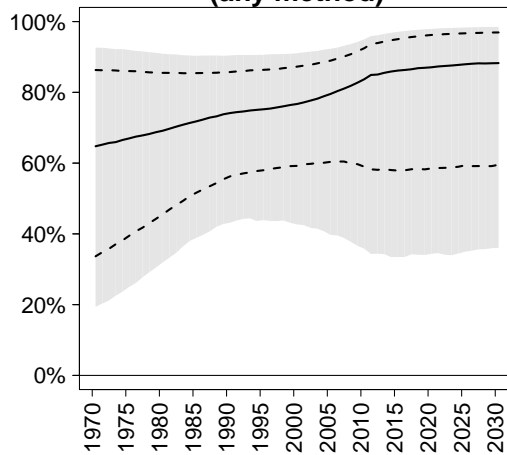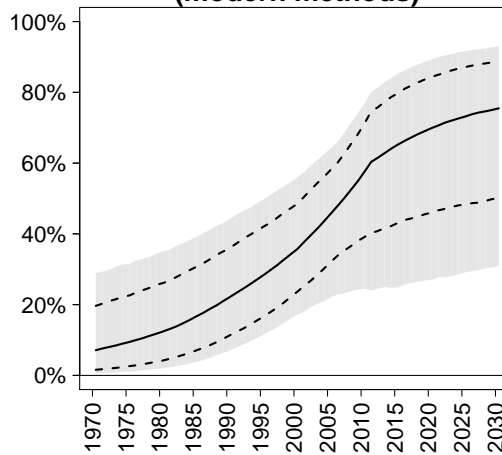



Brazil --- All women

CP (any)

CP (modern)

CP (traditional)

Unmet need among all unmarried women

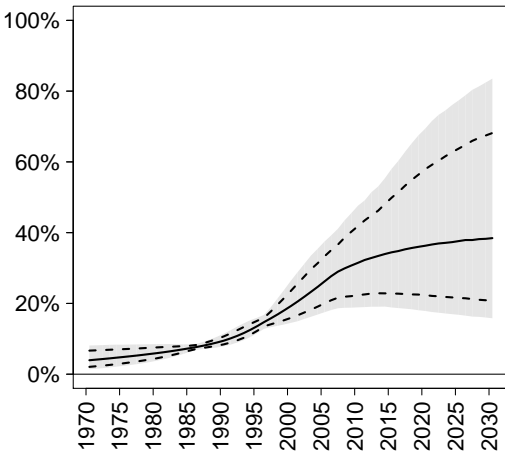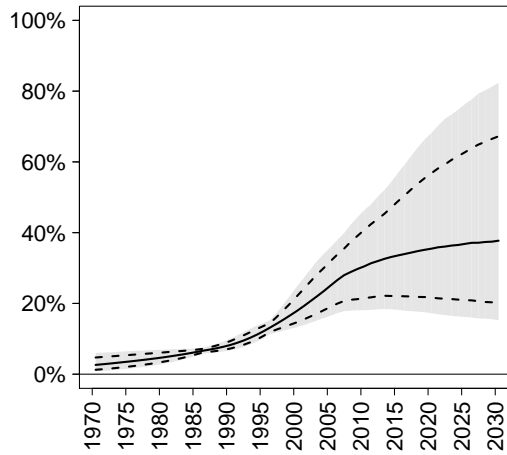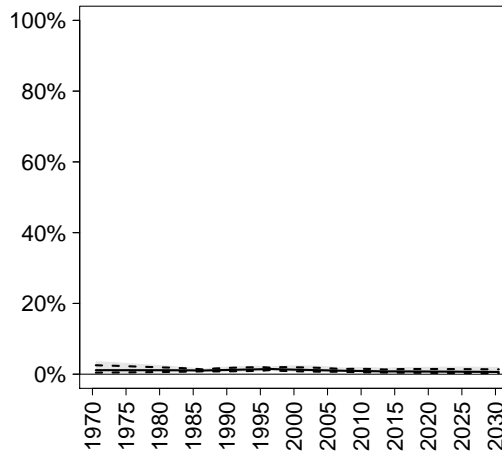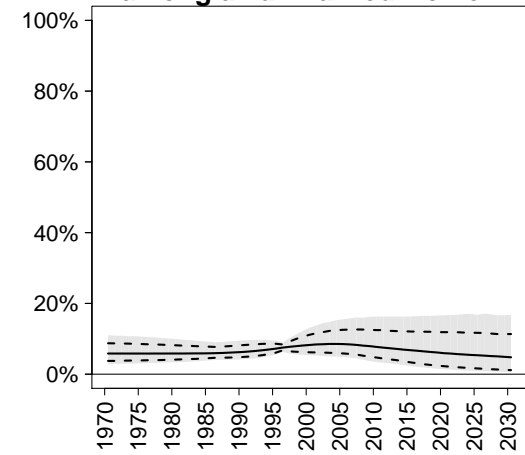

Total demand

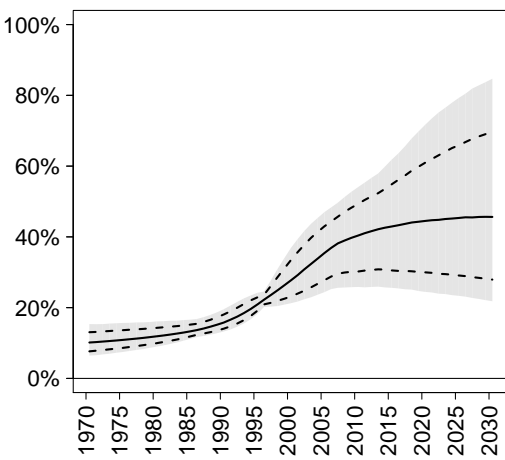

Burkina Faso --- All women

**CP (any)**

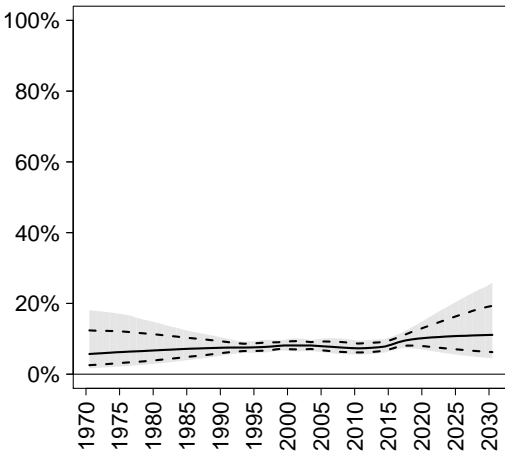

**CP (modern)**

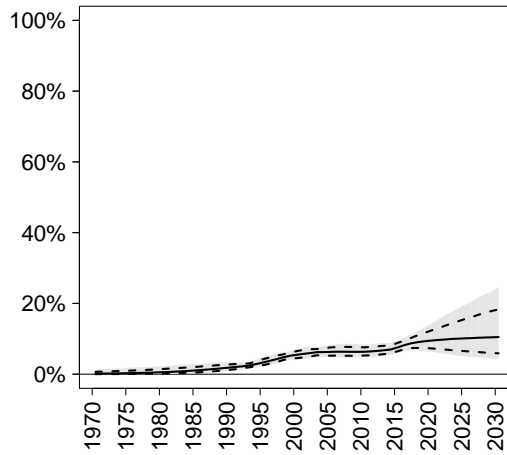

**CP (traditional)**

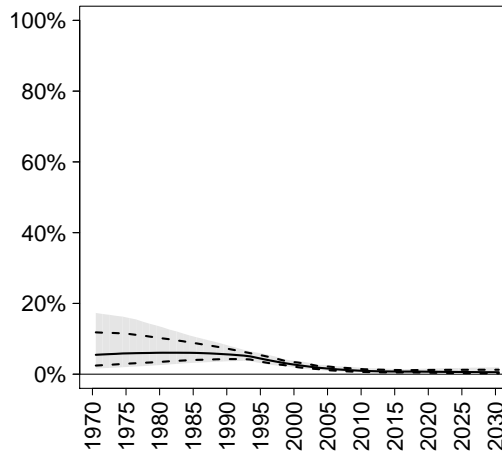

**Unmet need among all unmarried women**

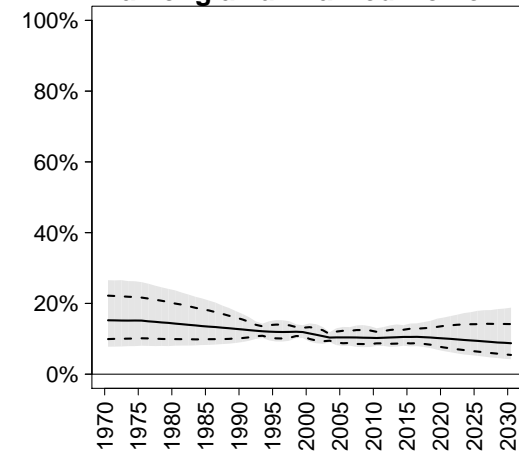

**Total demand**

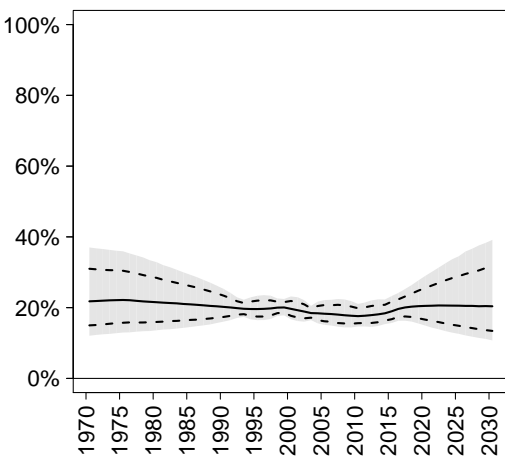

**Demand satisfied (any method)**

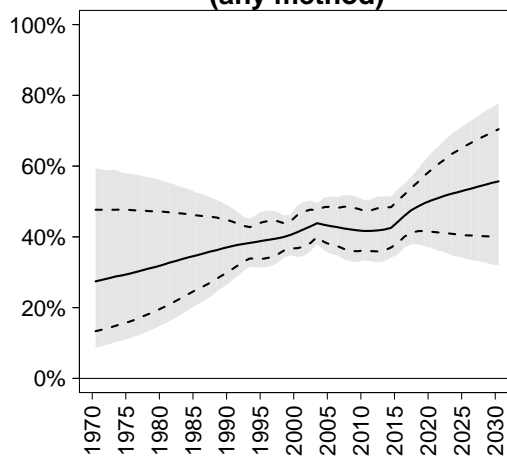

**Demand satisfied (modern methods)**

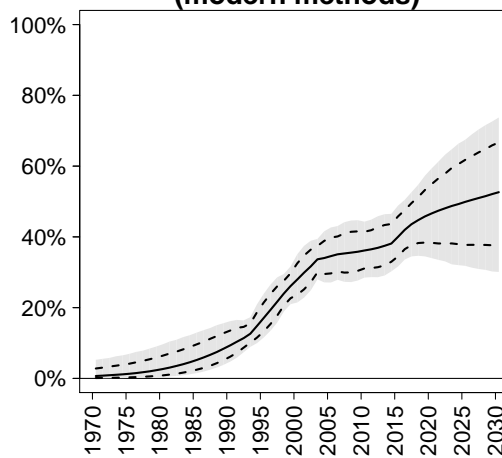

Burundi --- All women

**CP (any)**

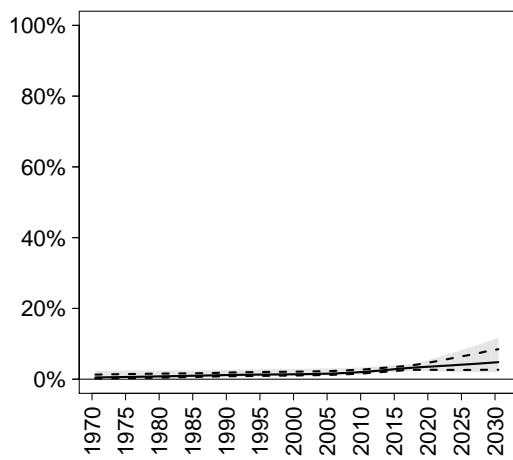

**CP (modern)**

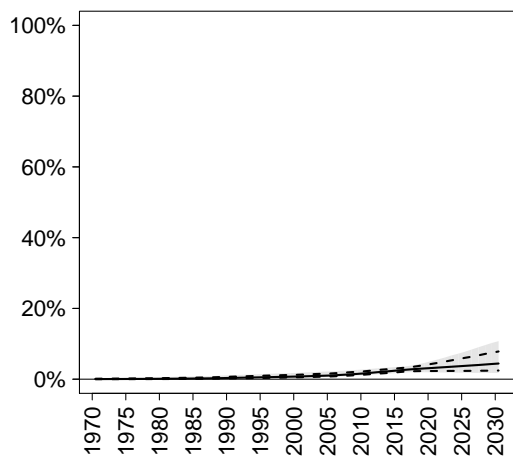

**CP (traditional)**

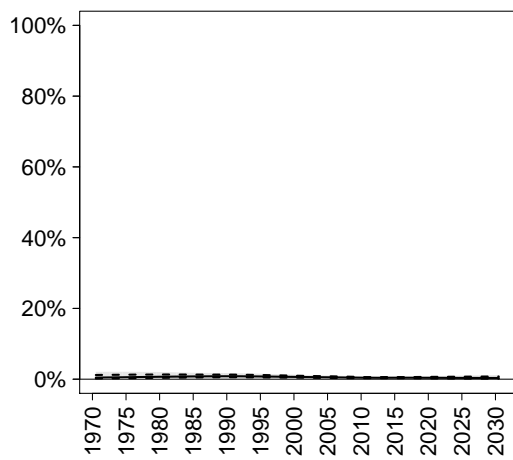

**Unmet need among all unmarried women**

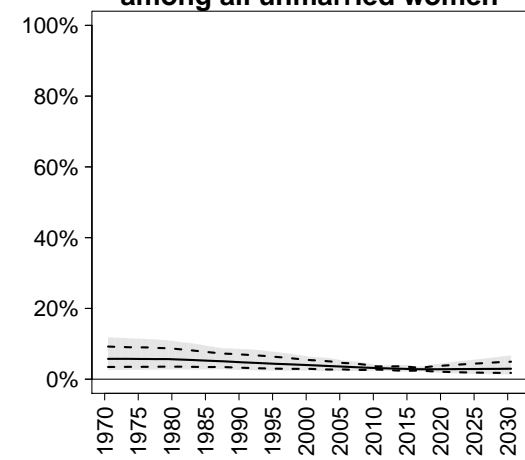

**Total demand**

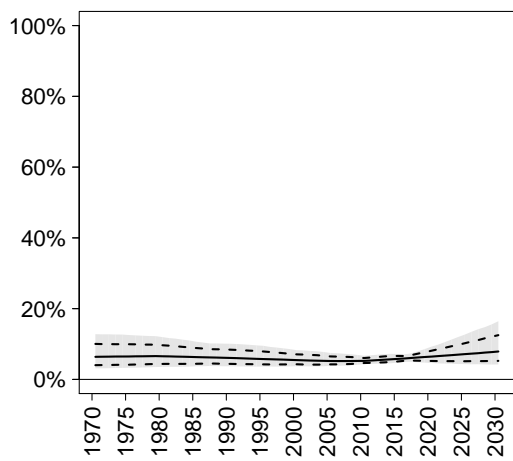

**Demand satisfied (any method)**

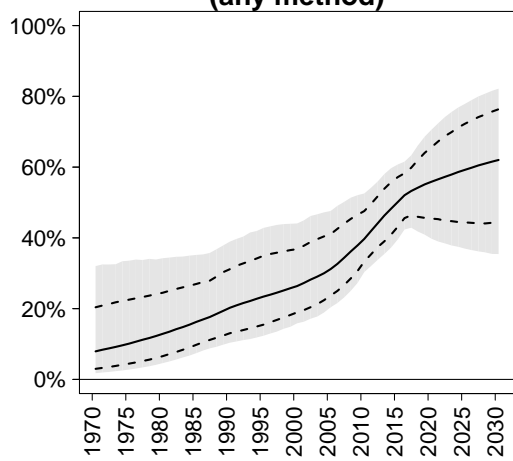

**Demand satisfied (modern methods)**

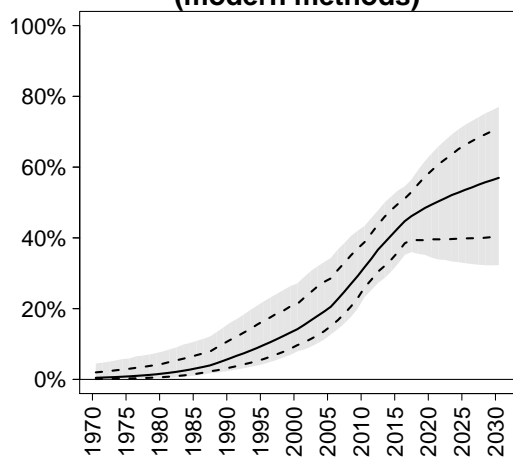

Cabo Verde --- All women

**CP (any)**

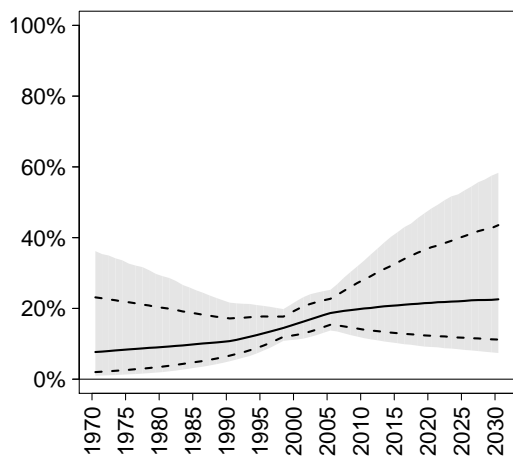

**CP (modern)**

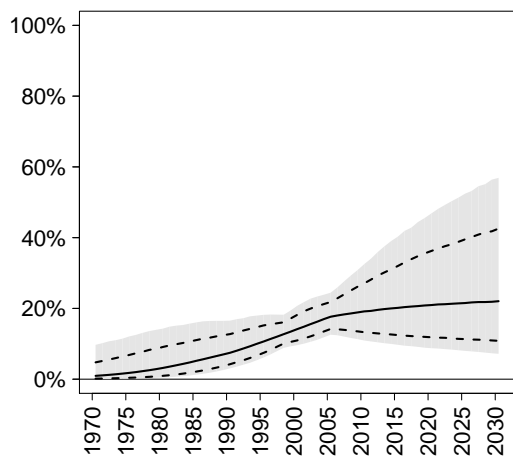

**CP (traditional)**

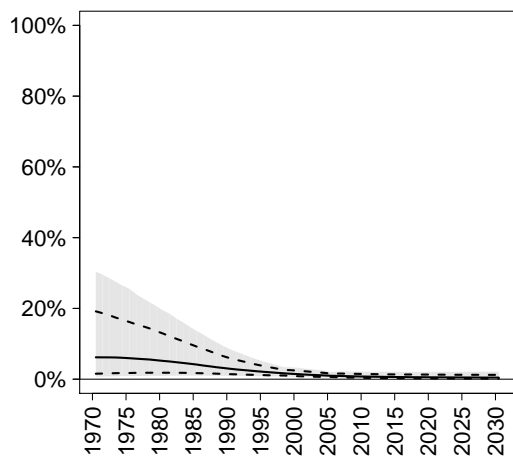

**Unmet need among all unmarried women**

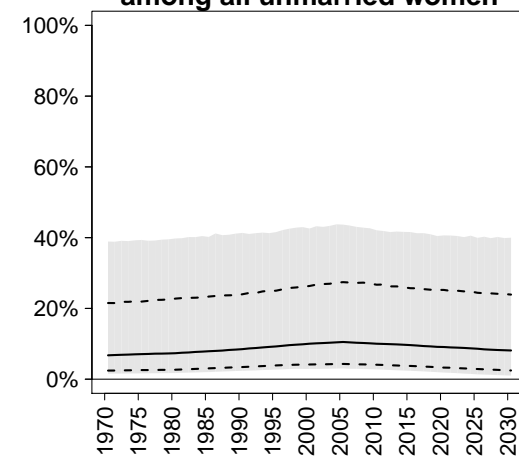

**Total demand**

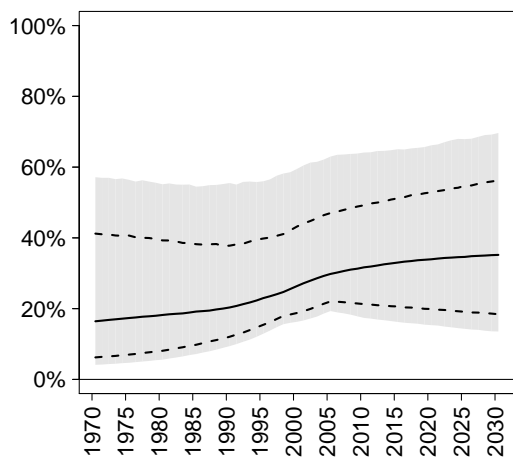

**Demand satisfied (any method)**

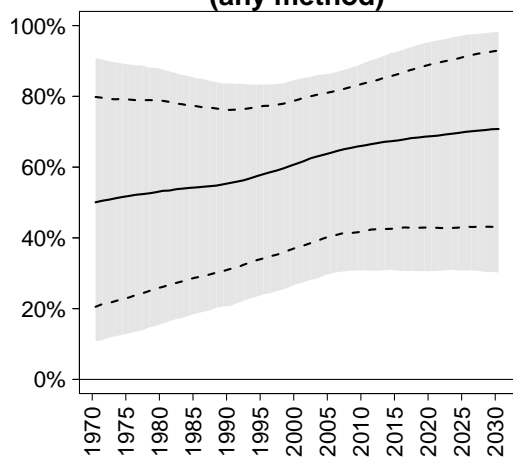

**Demand satisfied (modern methods)**

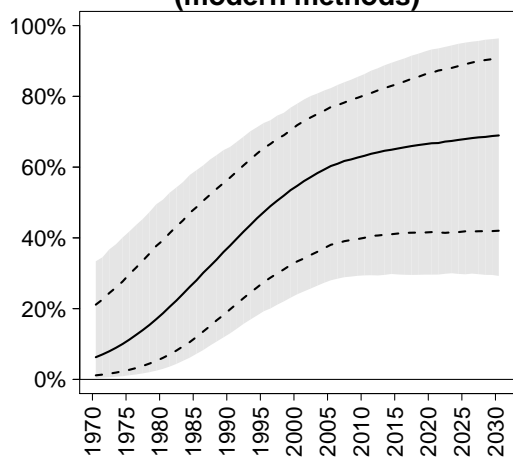

Cambodia --- All women

CP (any)

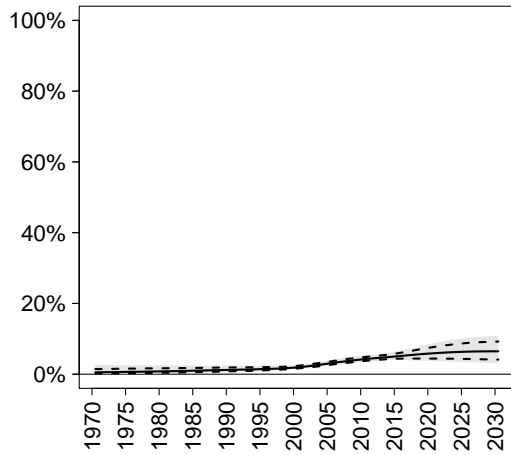

CP (modern)

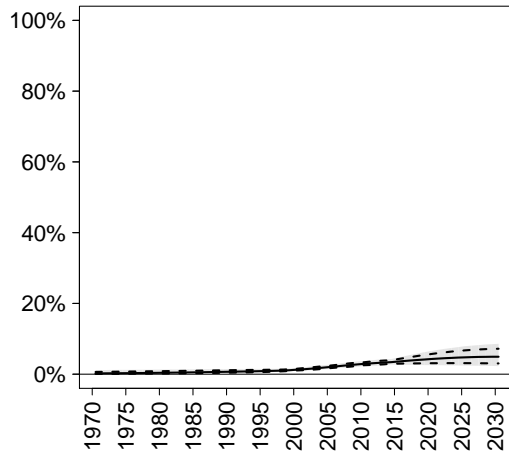

CP (traditional)

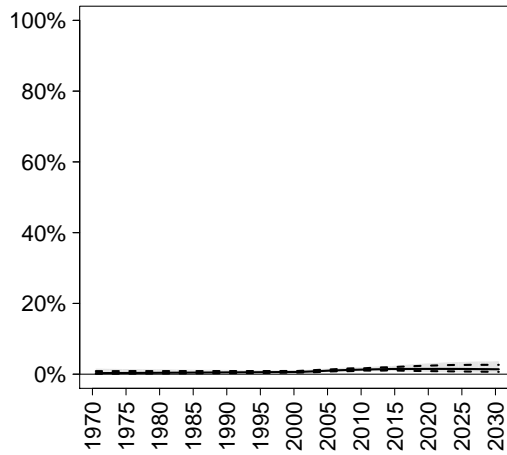

Unmet need among all unmarried women

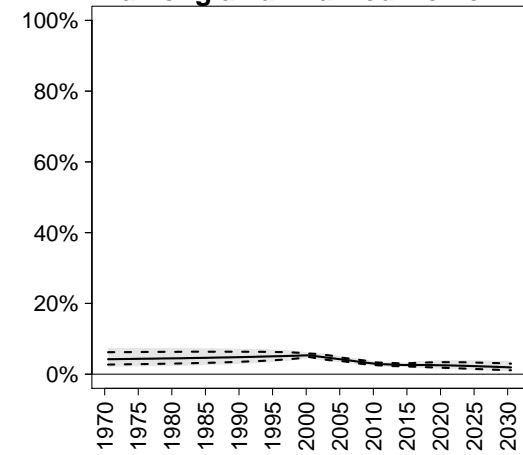

Total demand

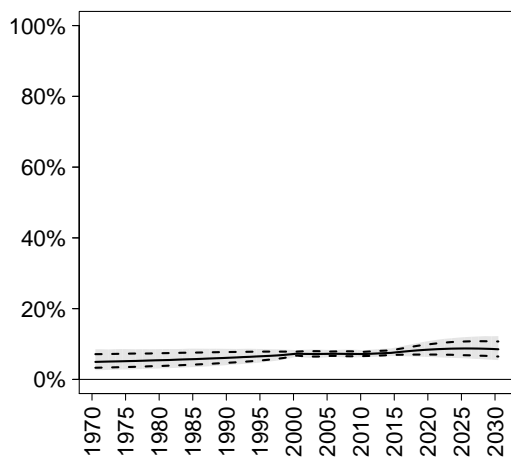

Demand satisfied (any method)

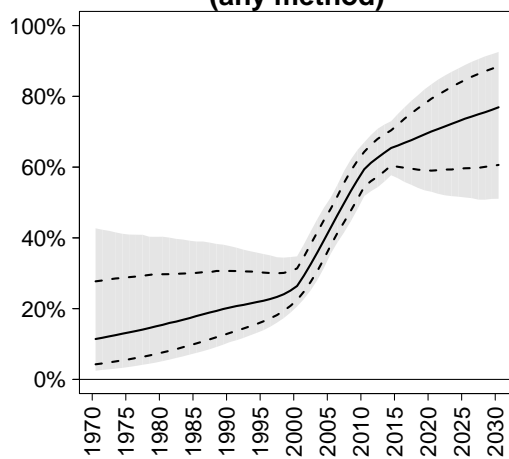

Demand satisfied (modern methods)

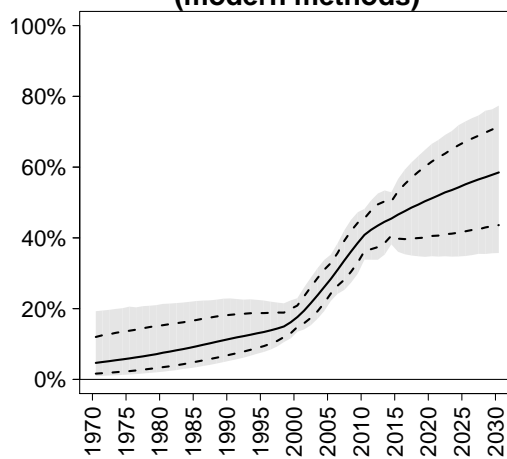

Cameroon --- All women

**CP (any)**

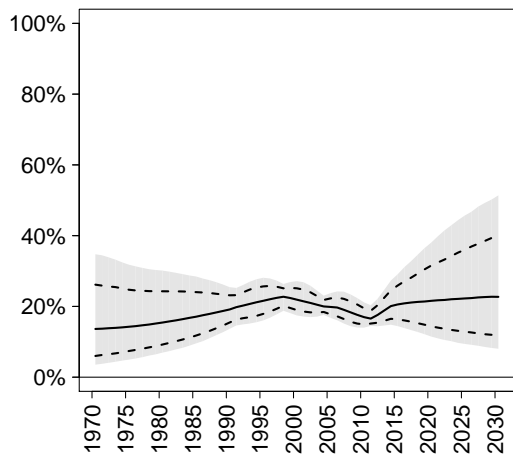

**CP (modern)**

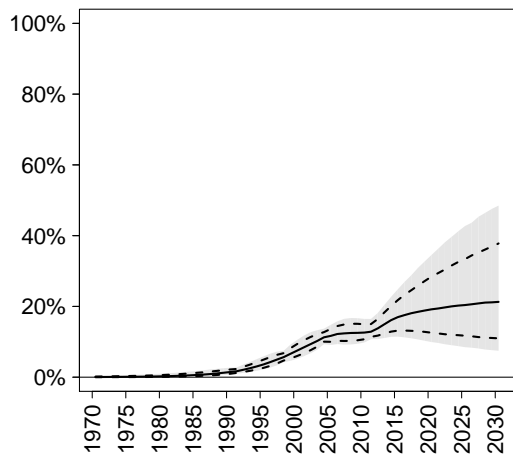

**CP (traditional)**

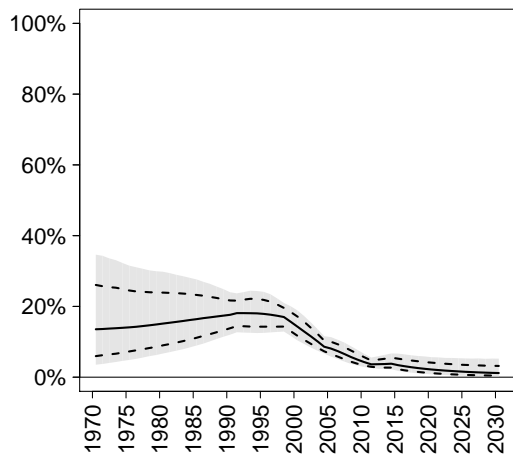

**Unmet need among all unmarried women**

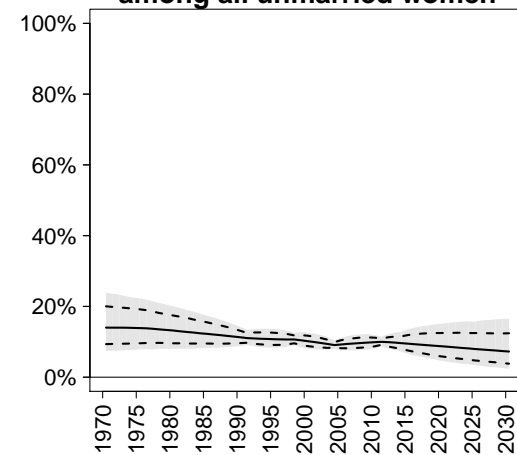

**Total demand**

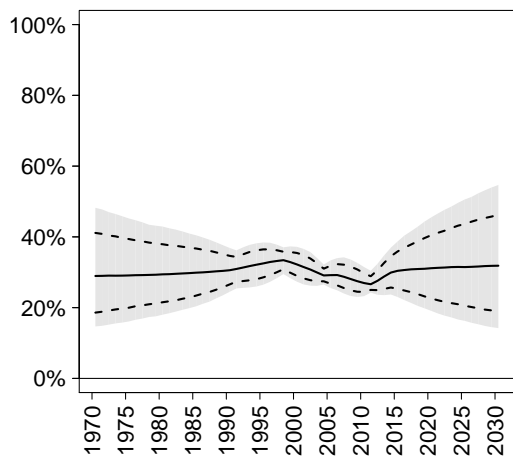

**Demand satisfied (any method)**

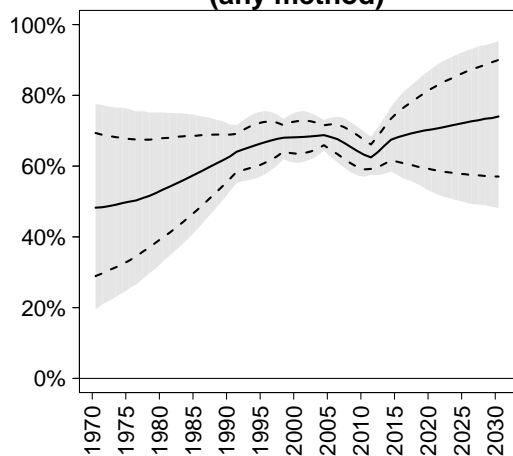

**Demand satisfied (modern methods)**

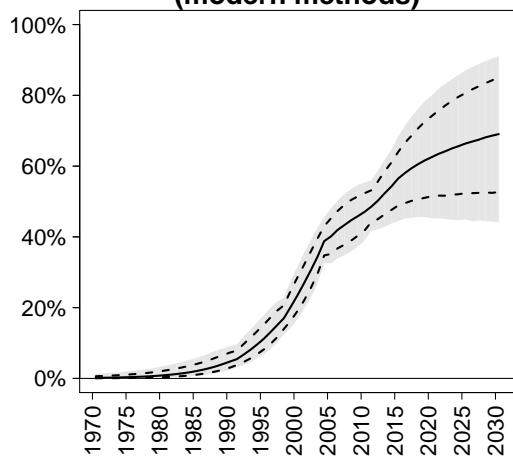

Central African Republic --- All women

**CP (any)**

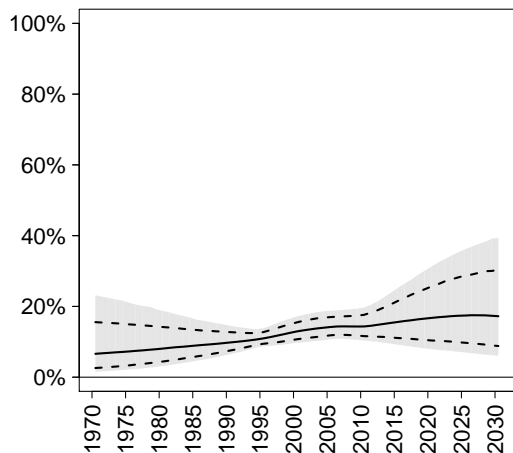

**CP (modern)**

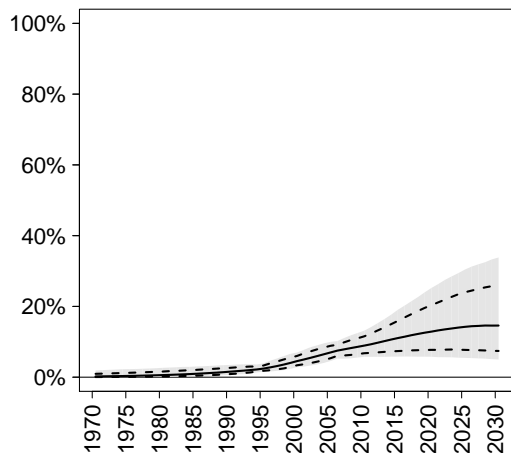

**CP (traditional)**

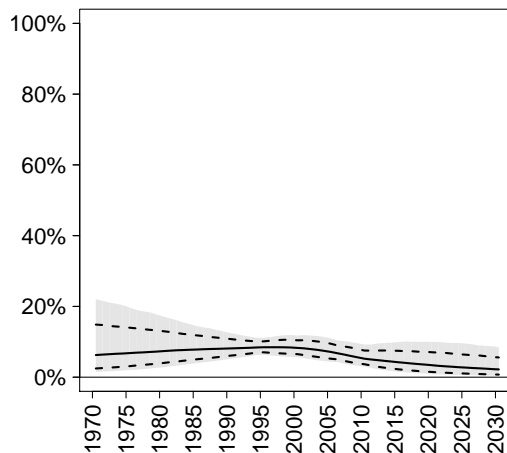

**Unmet need among all unmarried women**

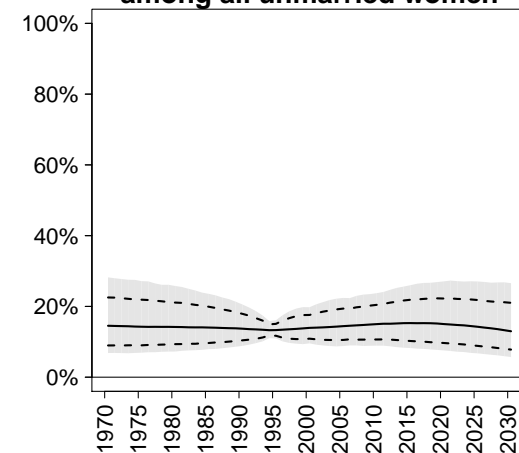

**Total demand**

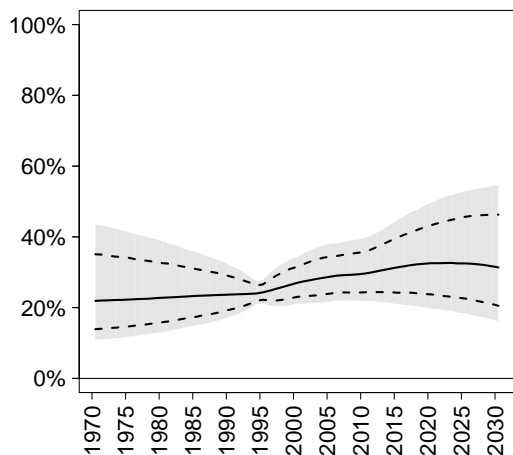

Chad --- All women

CP (any)

CP (modern)

CP (traditional)

Unmet need among all unmarried women

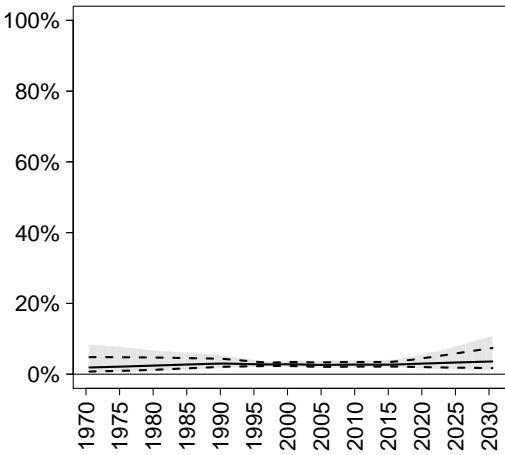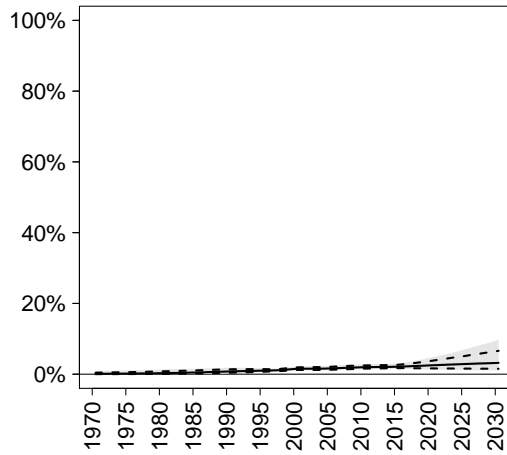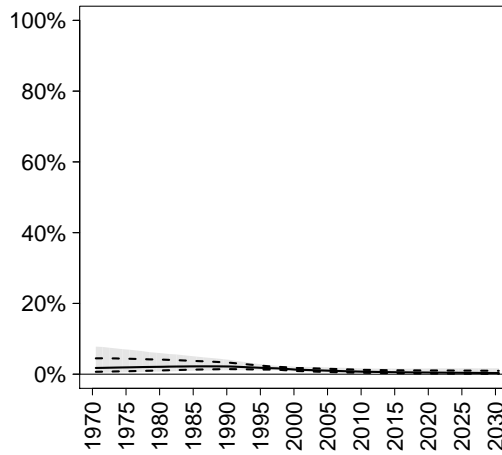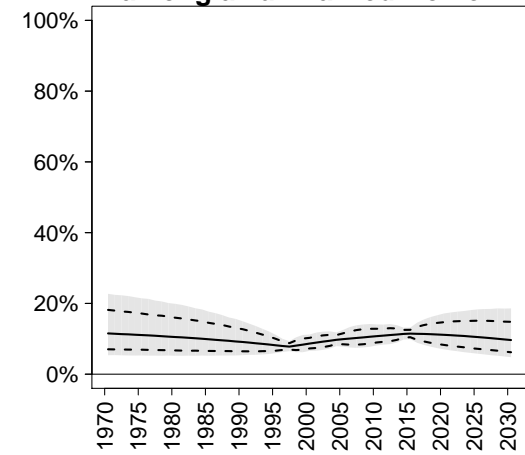

Total demand

Demand satisfied (any method)

Demand satisfied (modern methods)

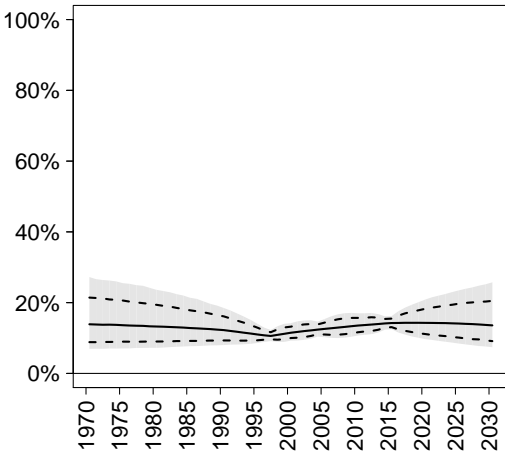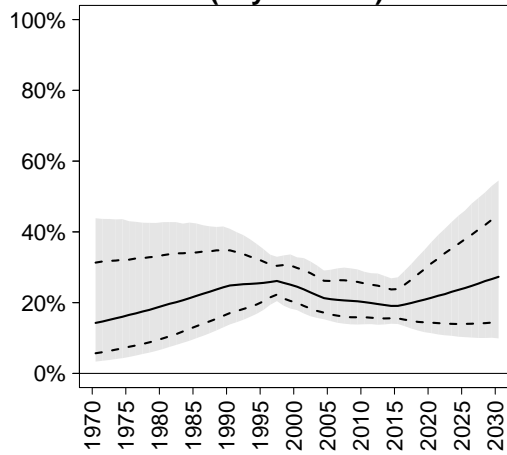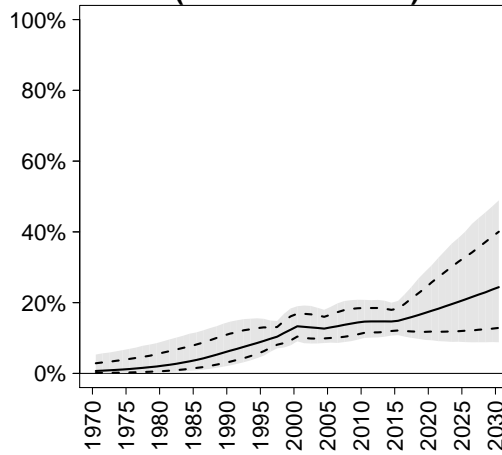



Colombia --- All women

CP (any)

CP (modern)

CP (traditional)

Unmet need among all unmarried women

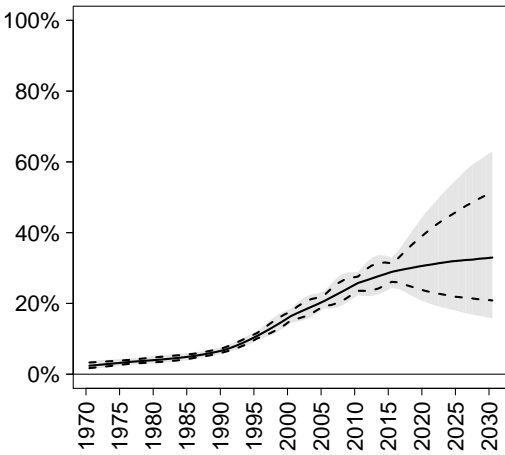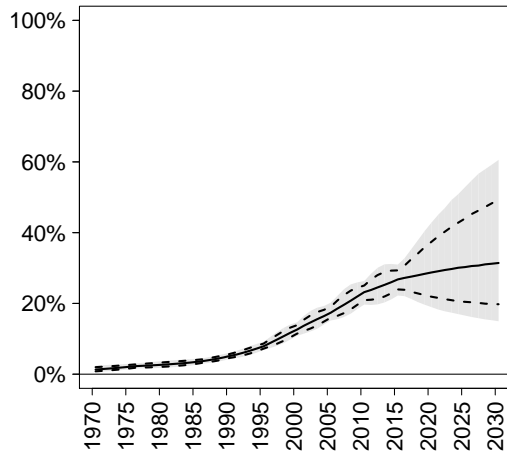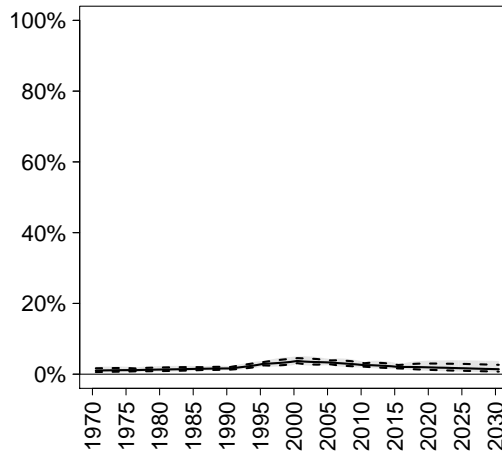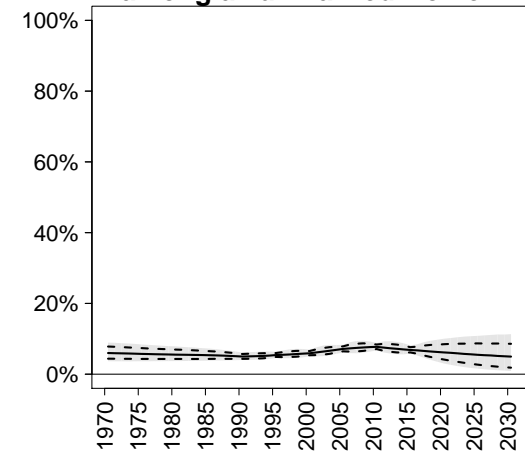

Total demand

Demand satisfied (any method)

Demand satisfied (modern methods)

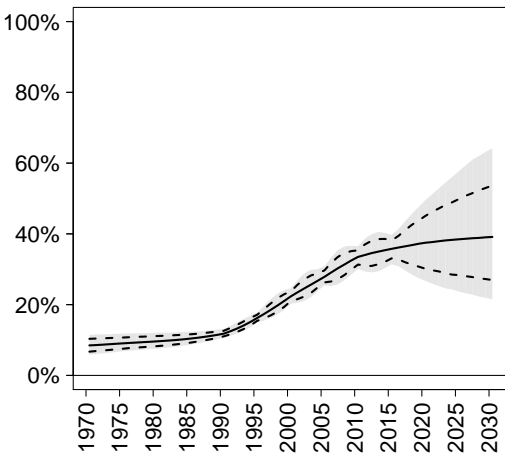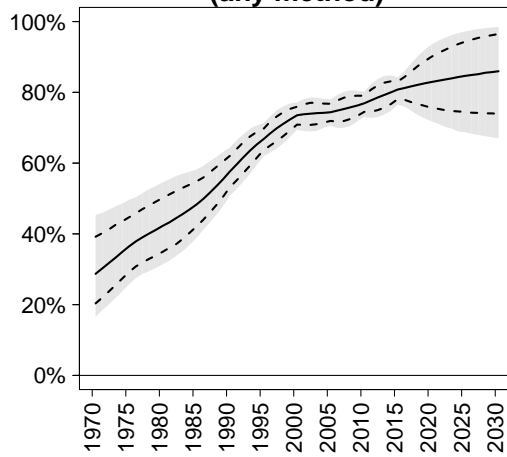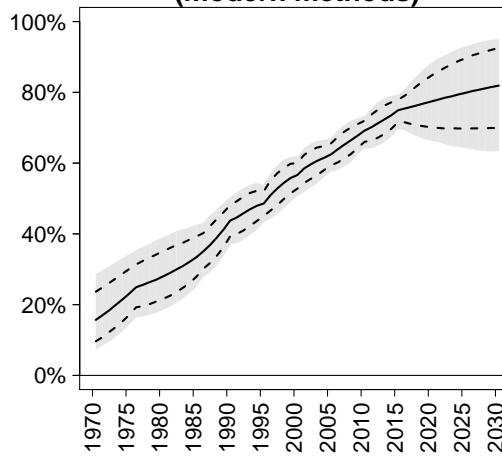

Comoros --- All women

CP (any)

CP (modern)

CP (traditional)

Unmet need among all unmarried women

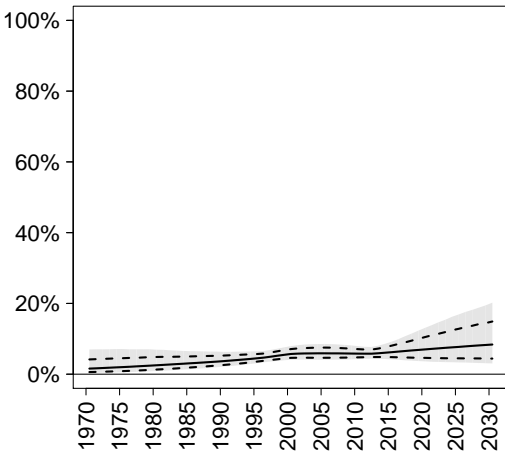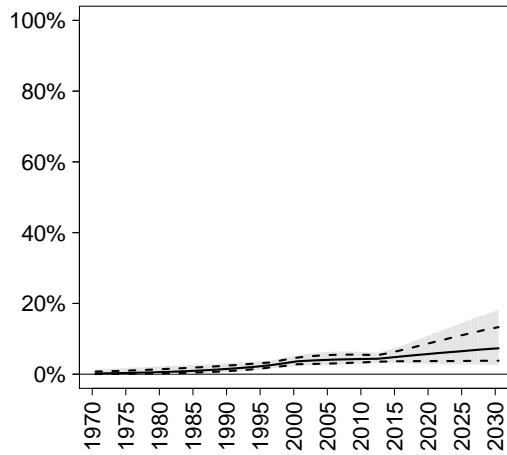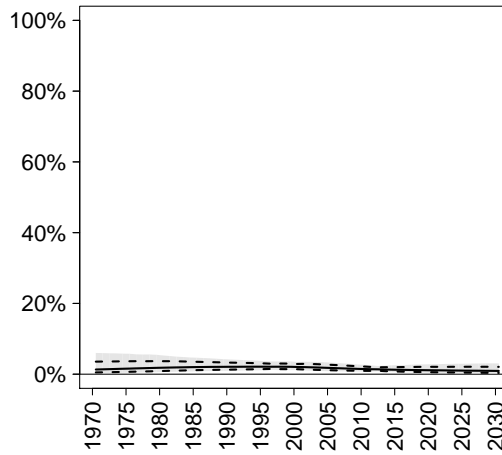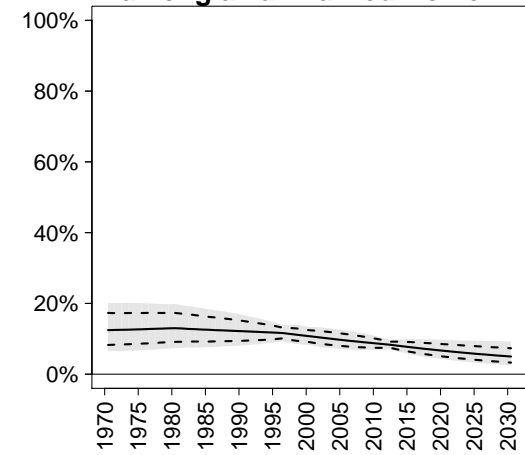

Total demand

Demand satisfied (any method)

Demand satisfied (modern methods)

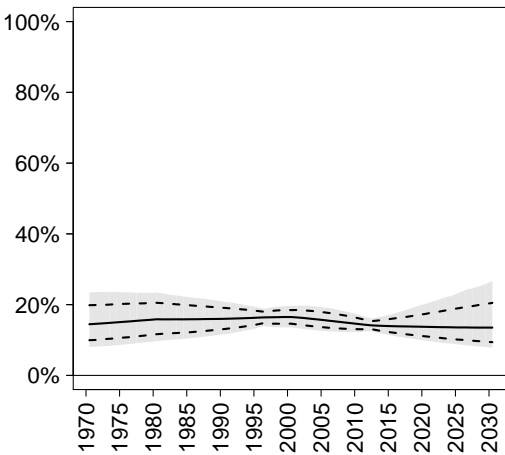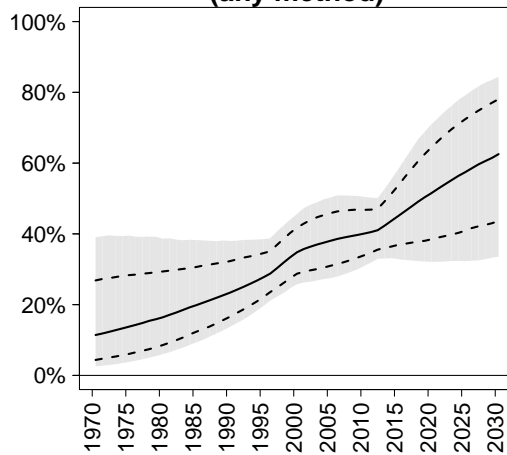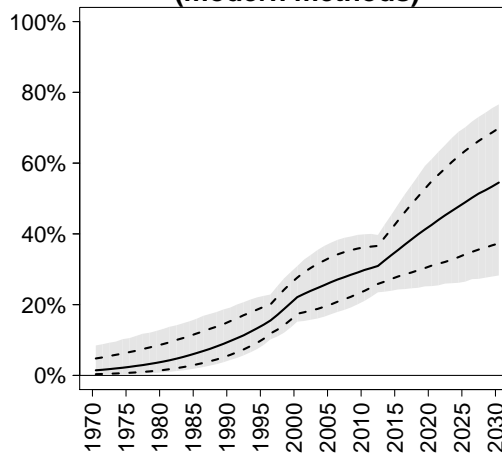

Congo --- All women

CP (any)

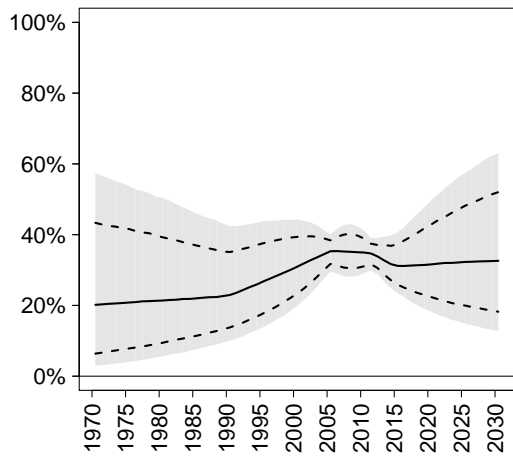

CP (modern)

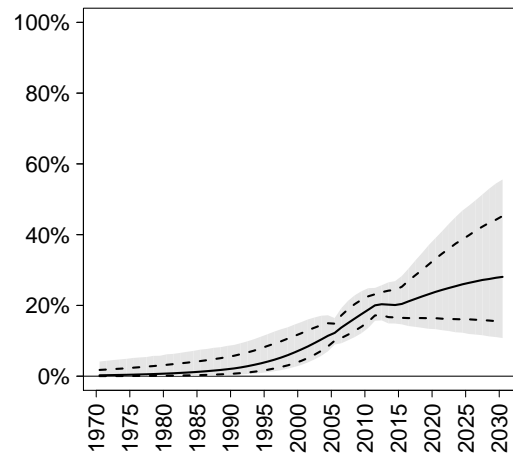

CP (traditional)

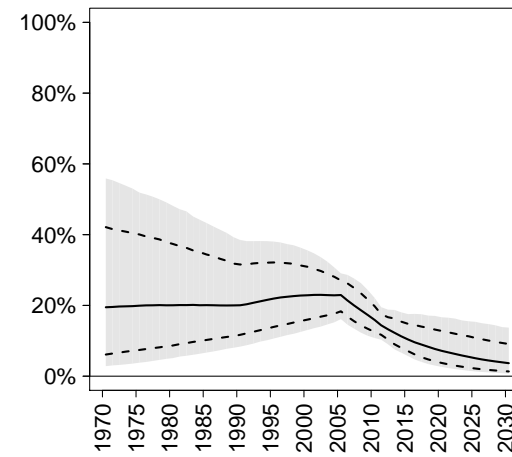

Unmet need among all unmarried women

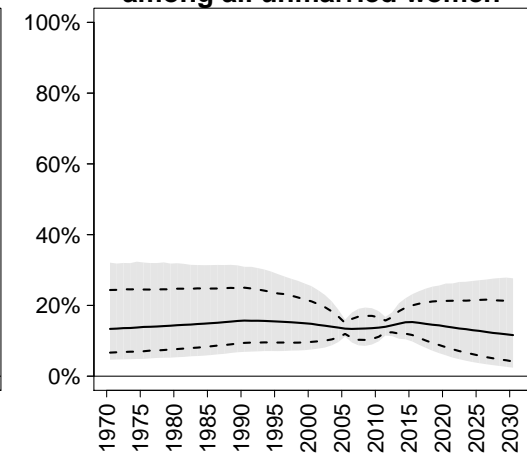

Total demand

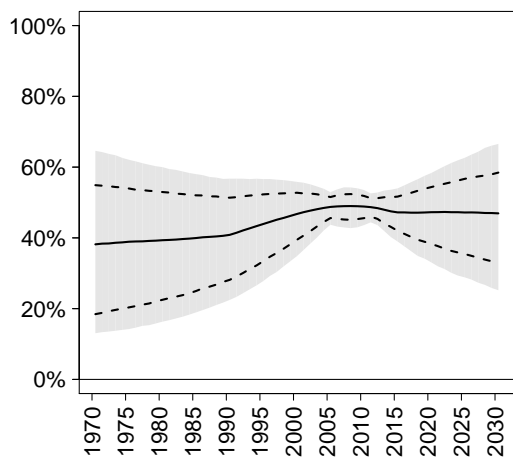

Costa Rica --- All women

CP (any)

CP (modern)

CP (traditional)

Unmet need among all unmarried women

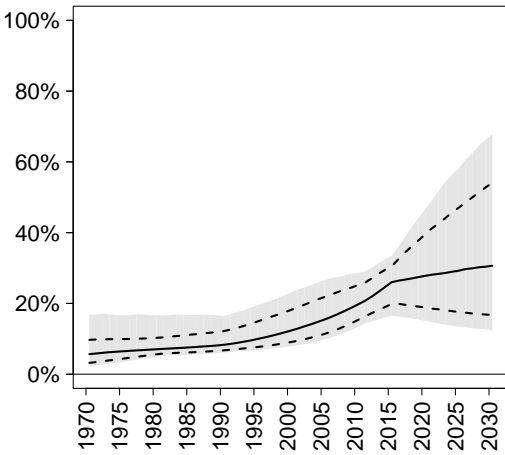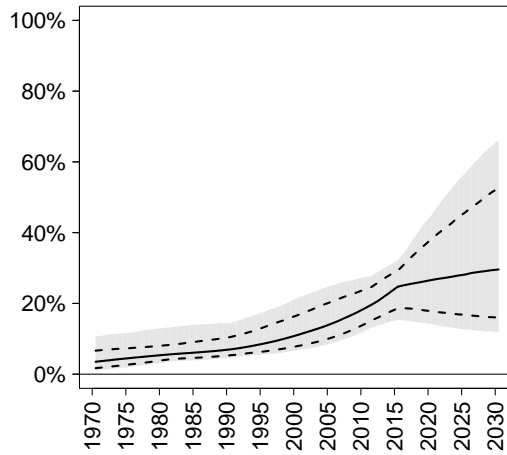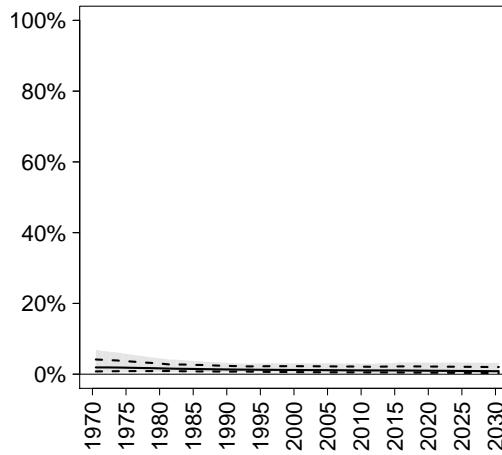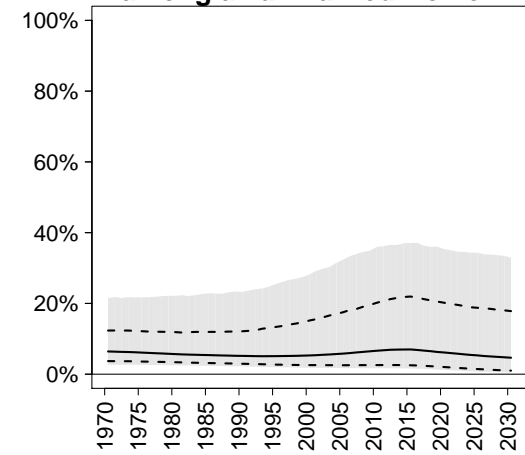

Total demand

Demand satisfied (any method)

Demand satisfied (modern methods)

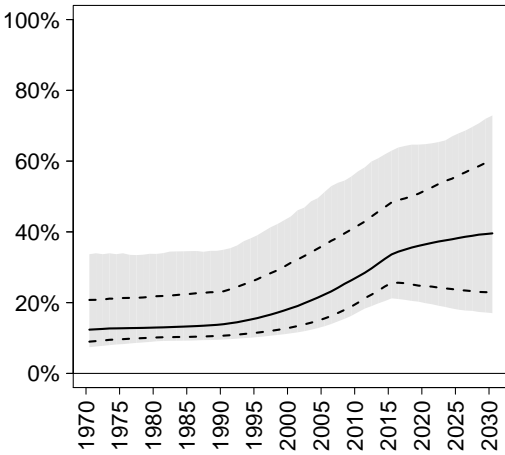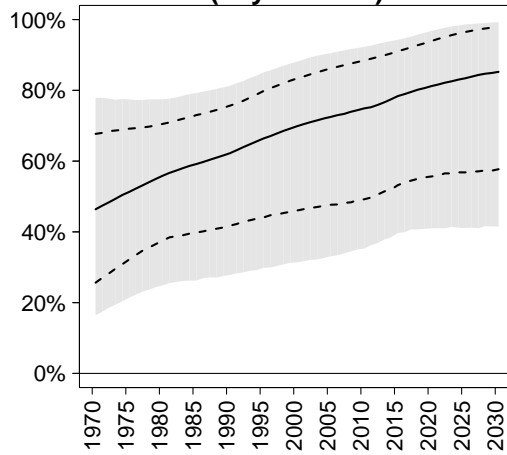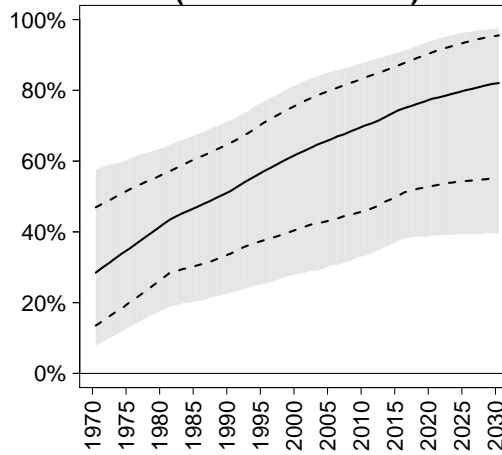

Côte d'Ivoire --- All women

**CP (any)**

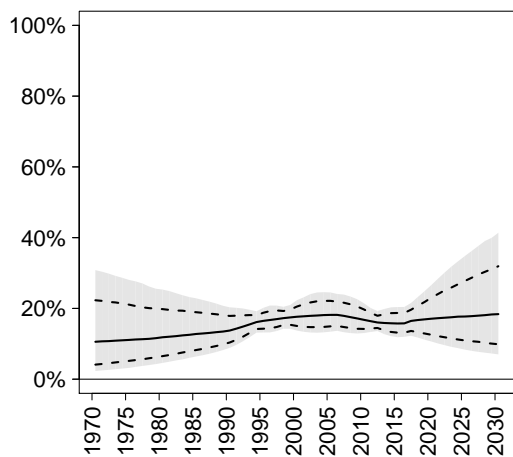

**CP (modern)**

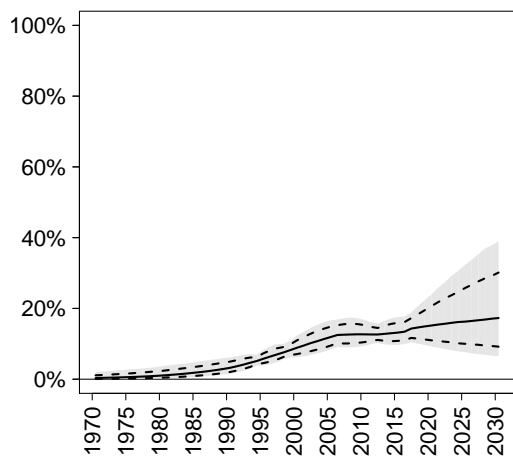

**CP (traditional)**

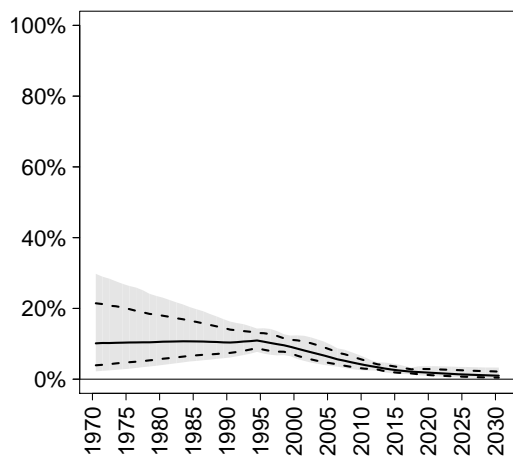

**Unmet need among all unmarried women**

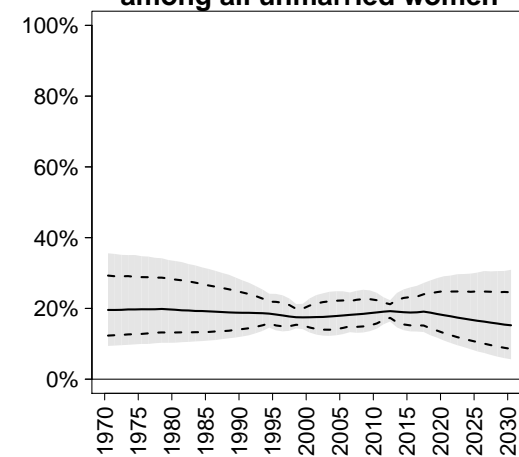

**Total demand**

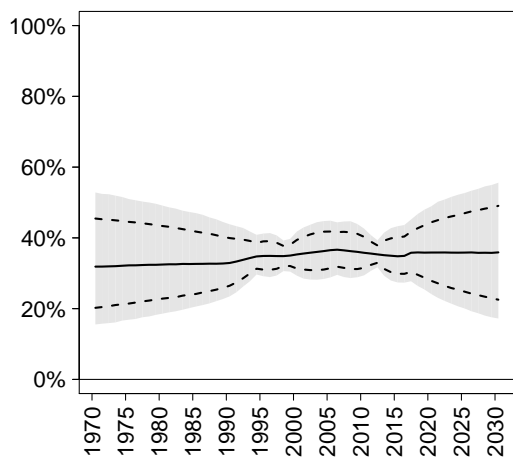

**Demand satisfied (any method)**

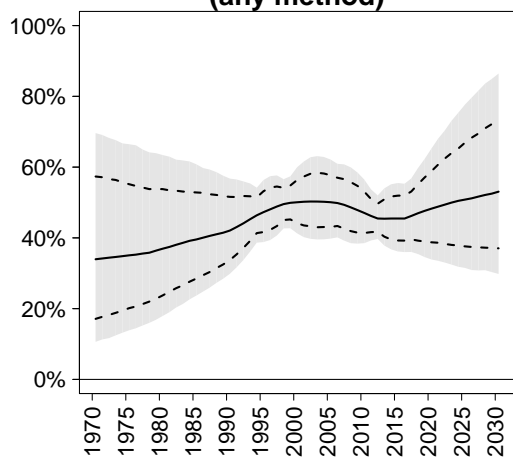

**Demand satisfied (modern methods)**

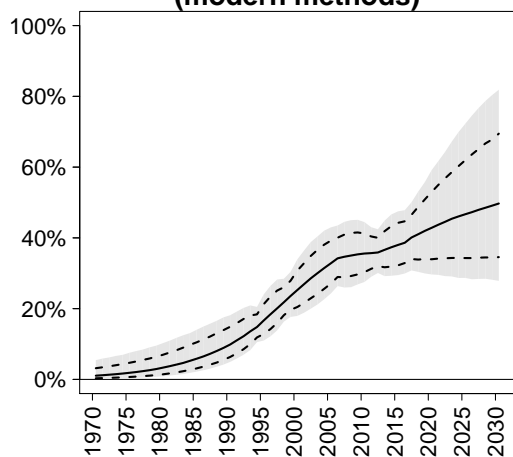

Cuba --- All women

**CP (any)**

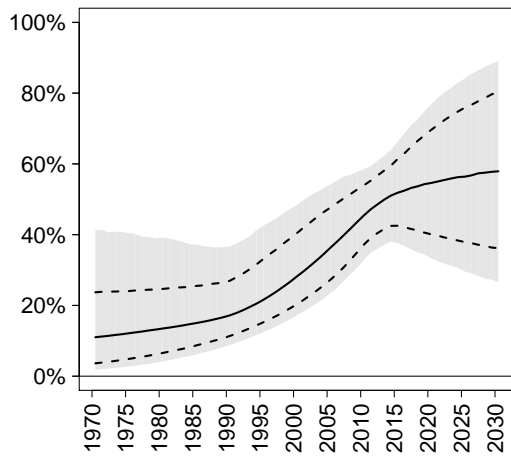

**CP (modern)**

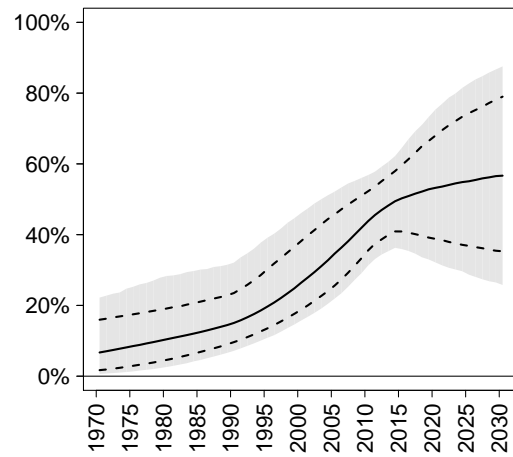

**CP (traditional)**

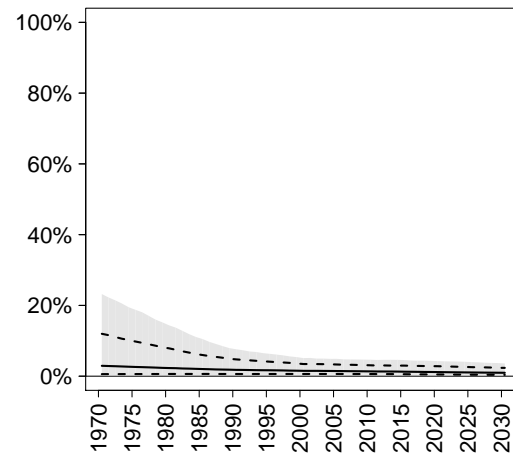

**Unmet need among all unmarried women**

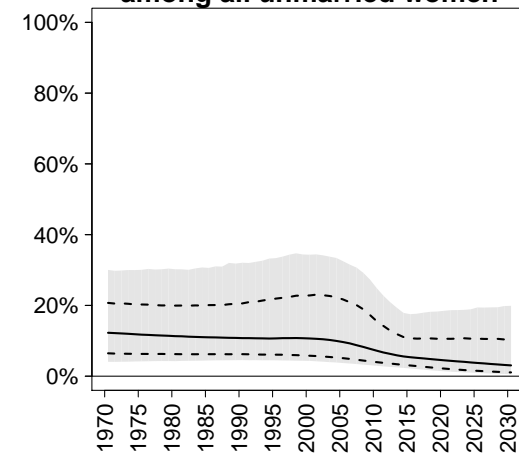

**Total demand**

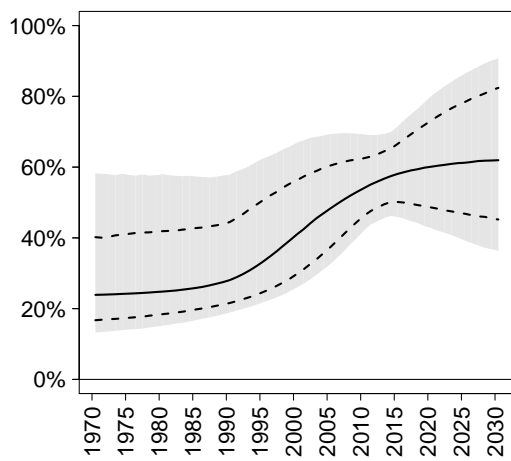

**Demand satisfied (any method)**

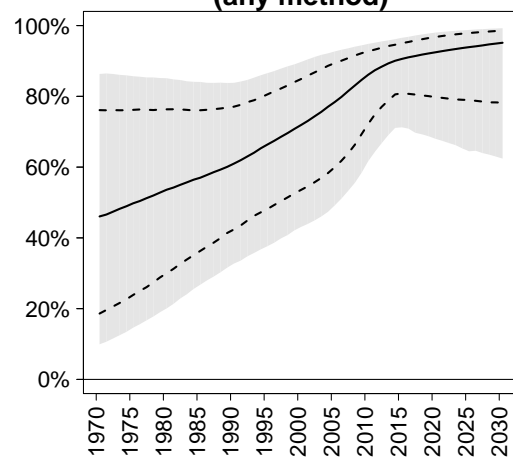

**Demand satisfied (modern methods)**

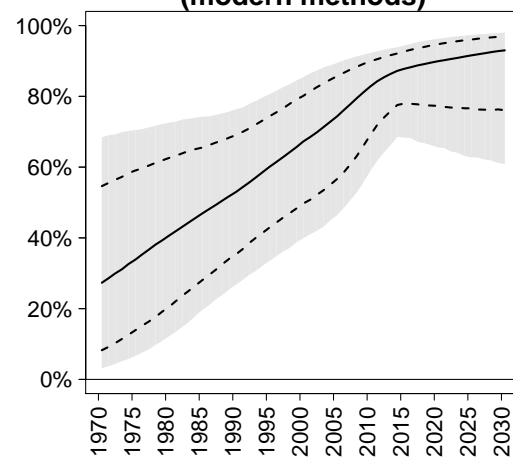

Democratic Republic of the Congo --- All women

**CP (any)**

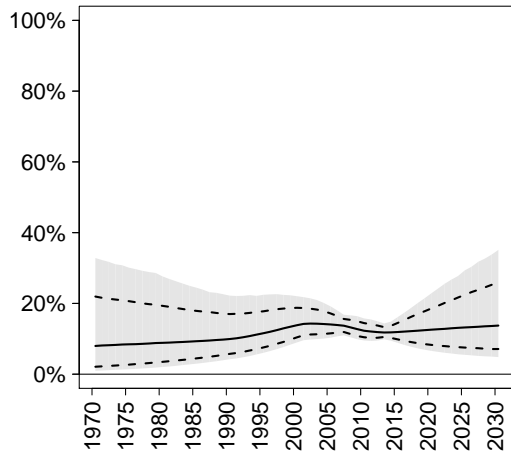

**CP (modern)**

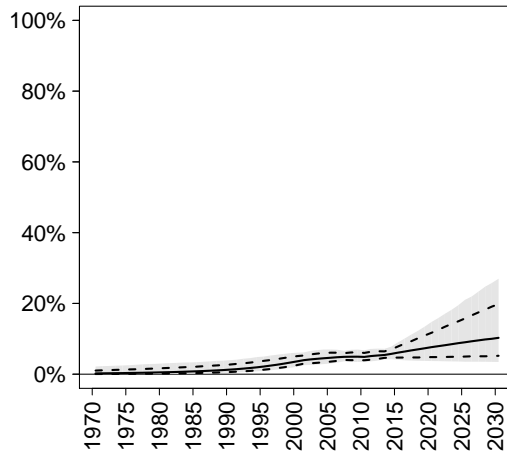

**CP (traditional)**

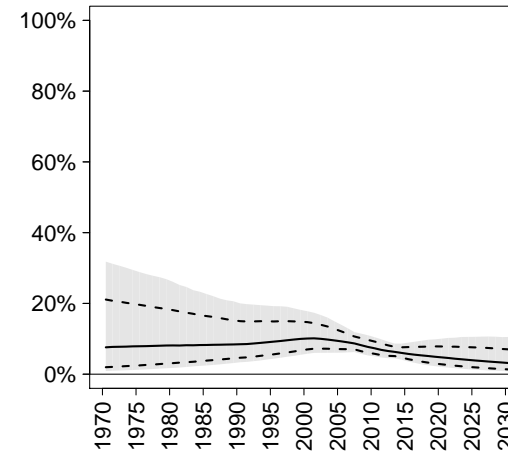

**Unmet need among all unmarried women**

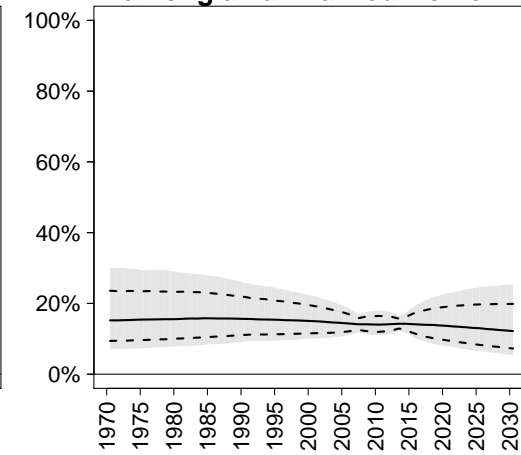

**Total demand**

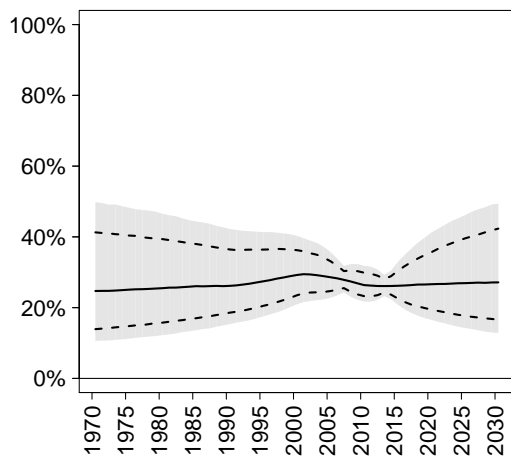

**Demand satisfied (any method)**

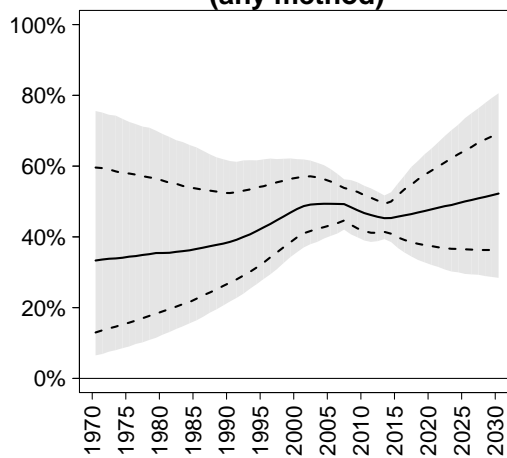

**Demand satisfied (modern methods)**

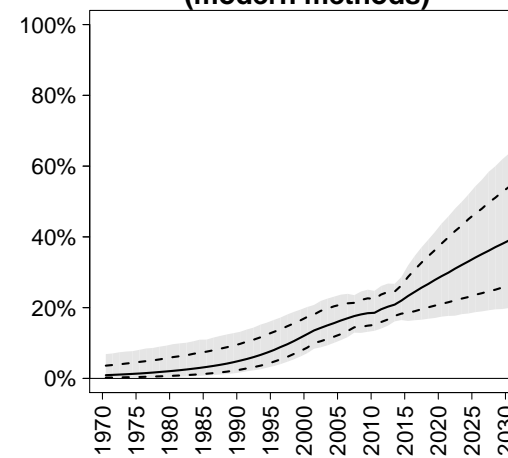

Dominican Republic --- All women

**CP (any)**

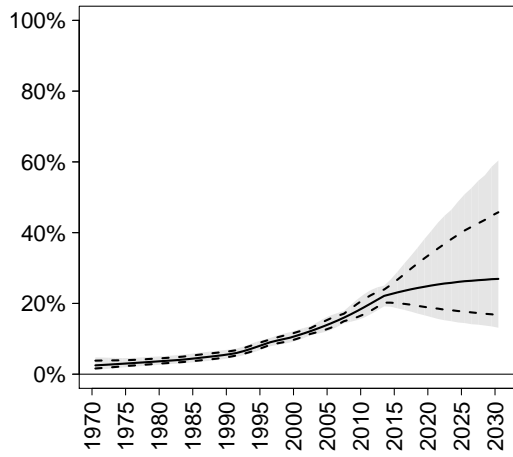

**CP (modern)**

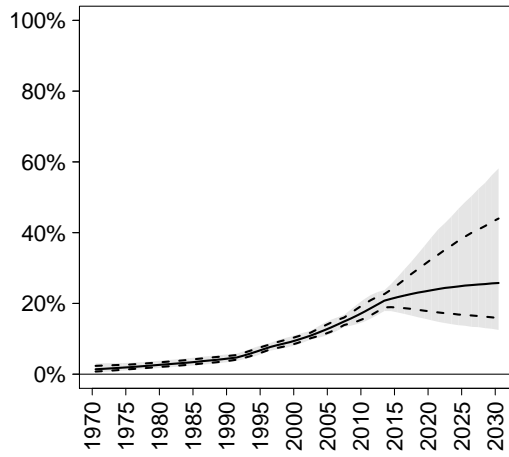

**CP (traditional)**

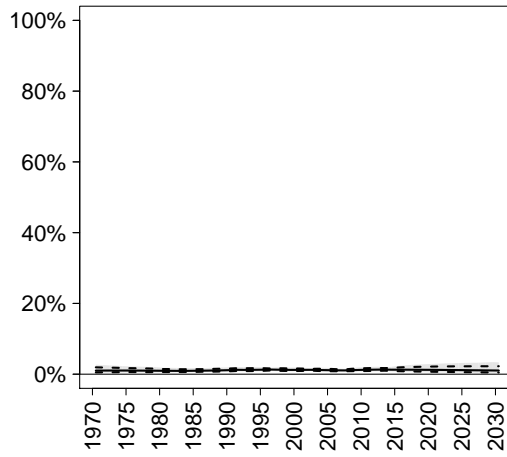

**Unmet need among all unmarried women**

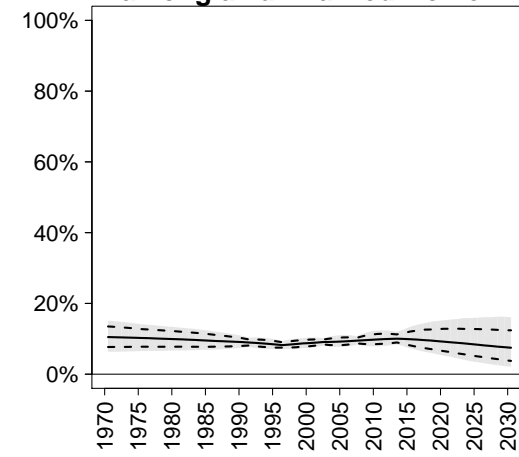

**Total demand**

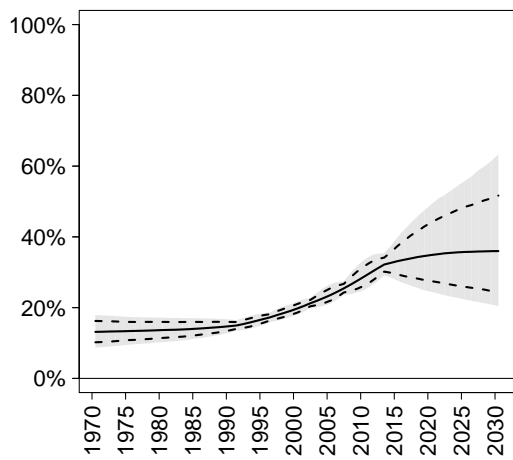

**Demand satisfied (any method)**

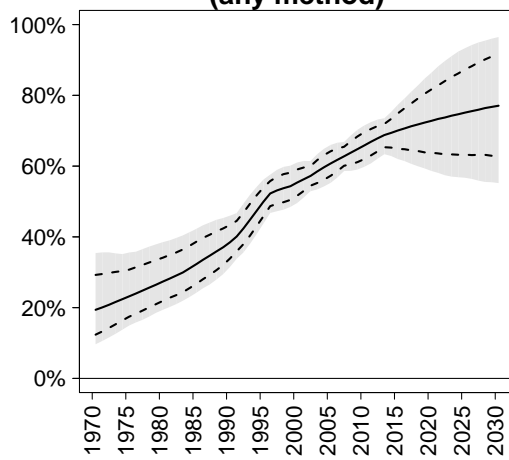

**Demand satisfied (modern methods)**

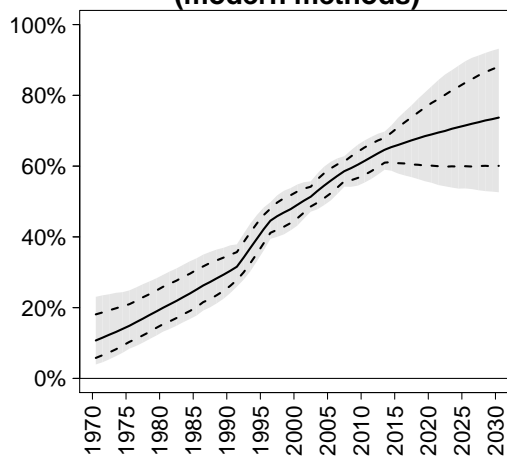



Ecuador --- All women

**CP (any)**

**CP (modern)**

**CP (traditional)**

**Unmet need  
among all unmarried women**

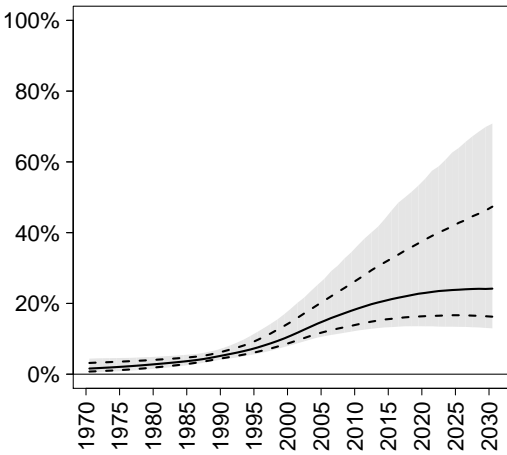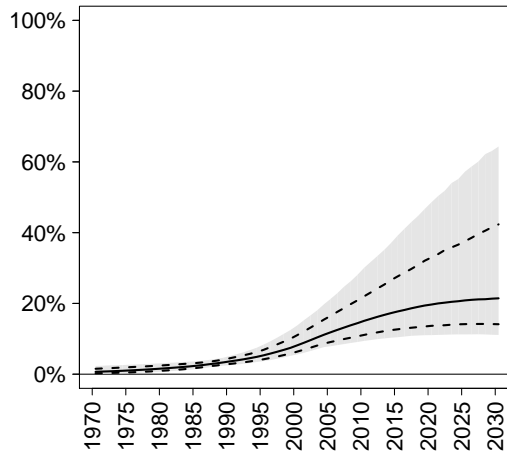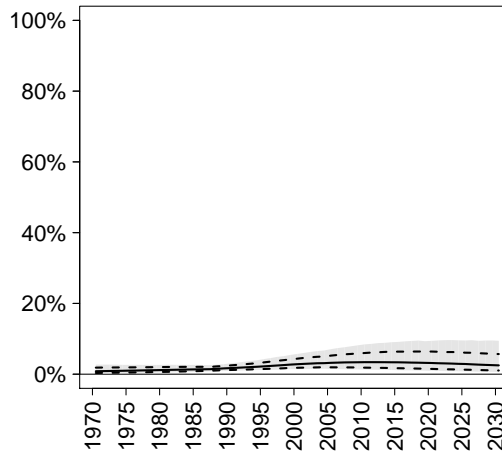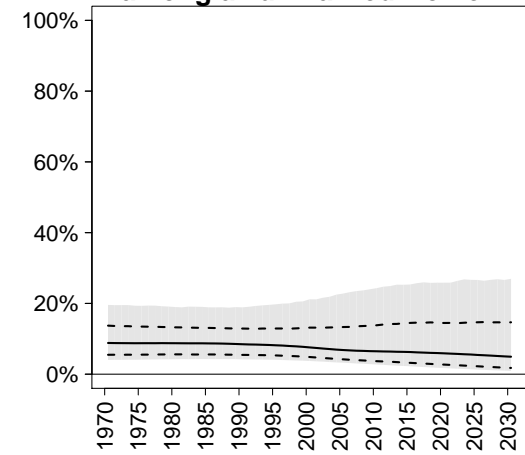

**Total demand**

**Demand satisfied  
(any method)**

**Demand satisfied  
(modern methods)**

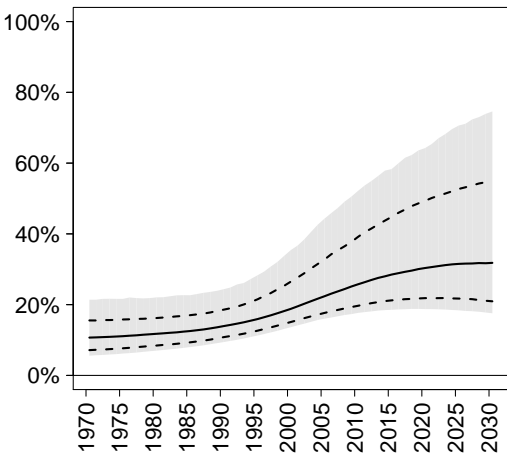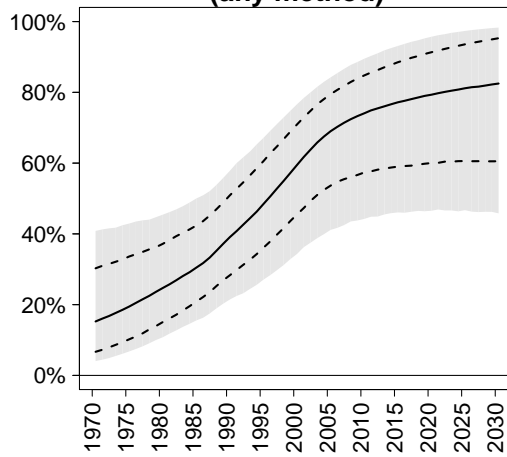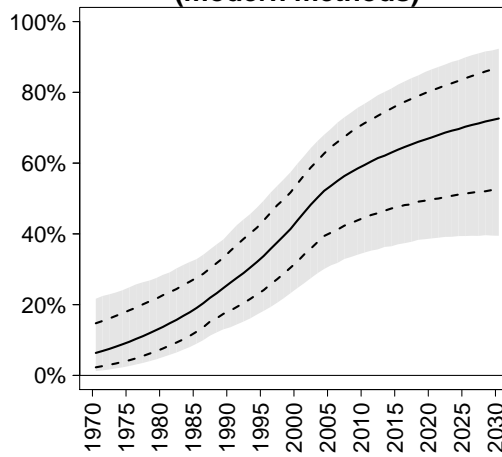

El Salvador --- All women

**CP (any)**

**CP (modern)**

**CP (traditional)**

**Unmet need among all unmarried women**

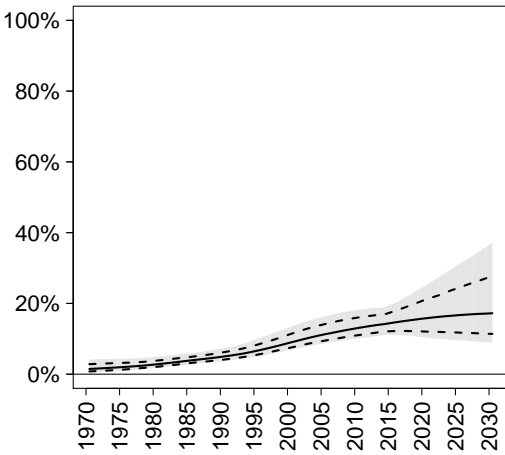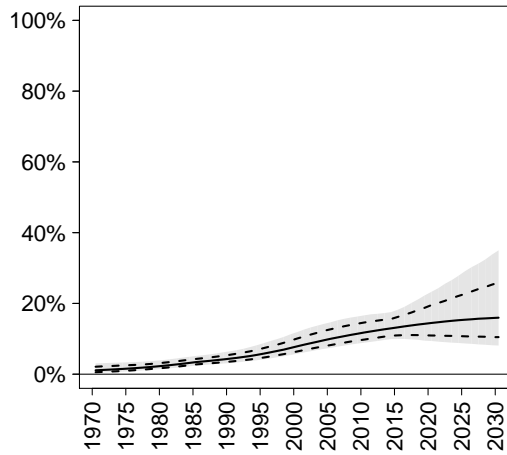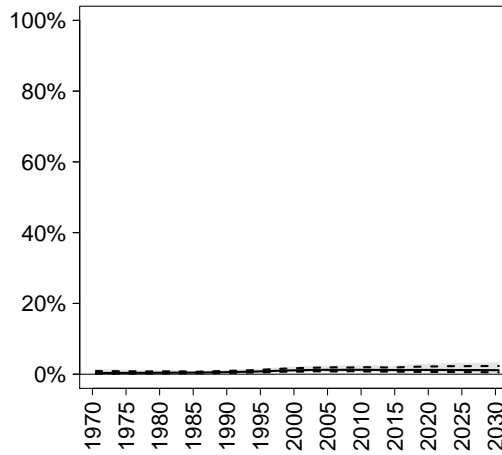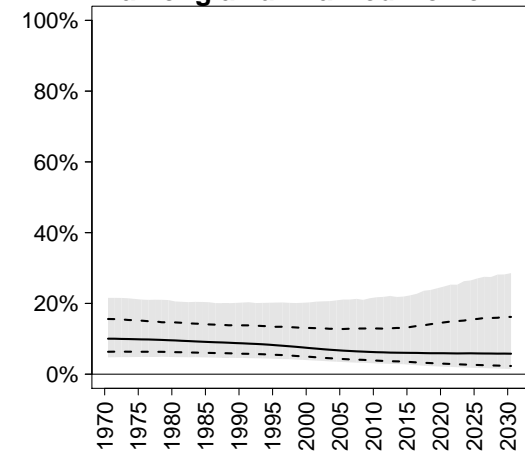

**Total demand**

**Demand satisfied (any method)**

**Demand satisfied (modern methods)**

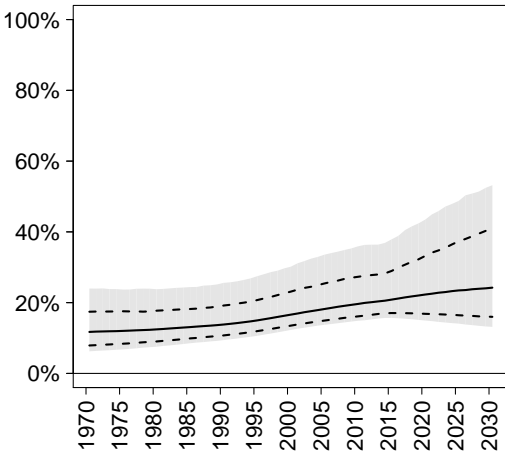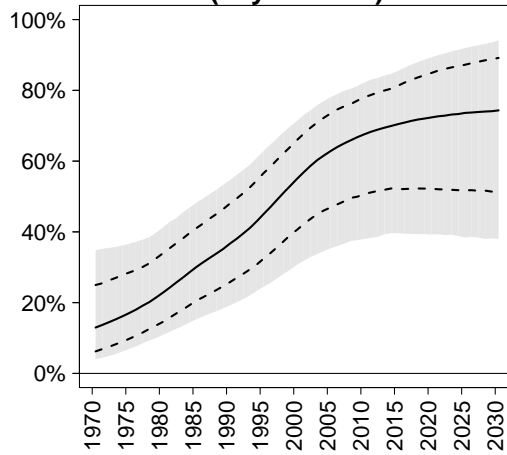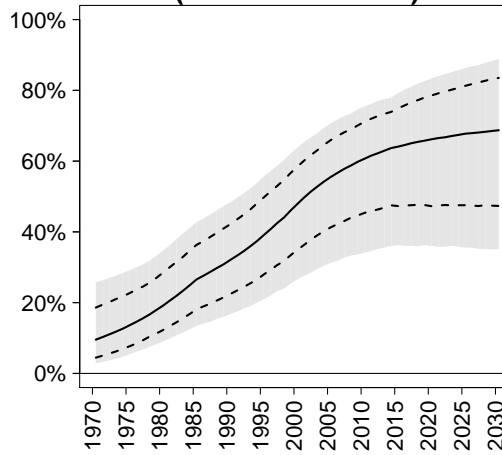

Eritrea --- All women

**CP (any)**

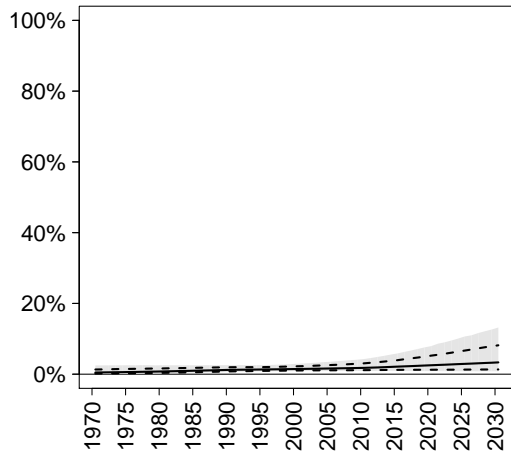

**CP (modern)**

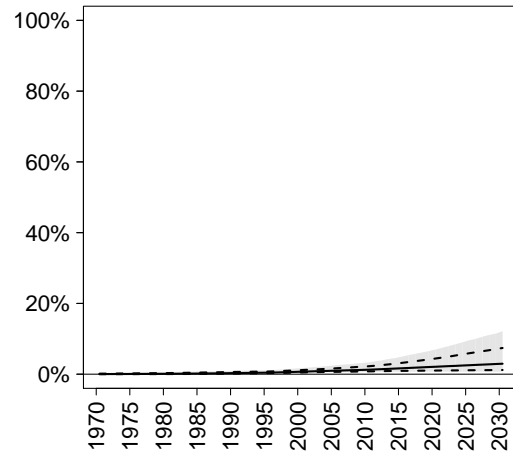

**CP (traditional)**

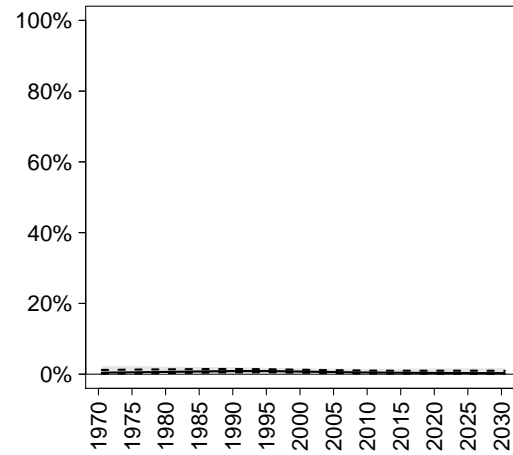

**Unmet need among all unmarried women**

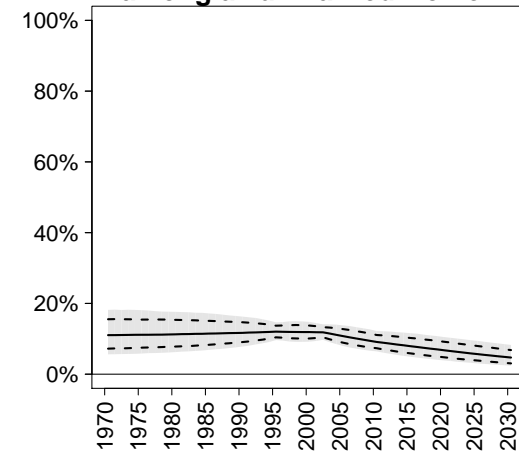

**Total demand**

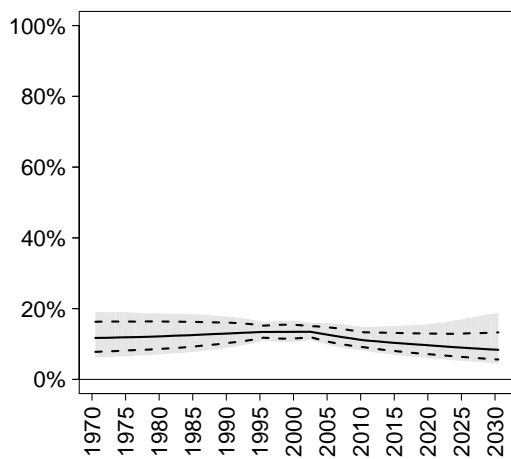

**Demand satisfied (any method)**

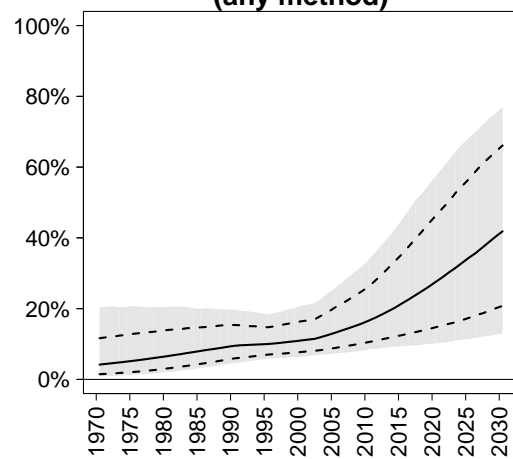

**Demand satisfied (modern methods)**

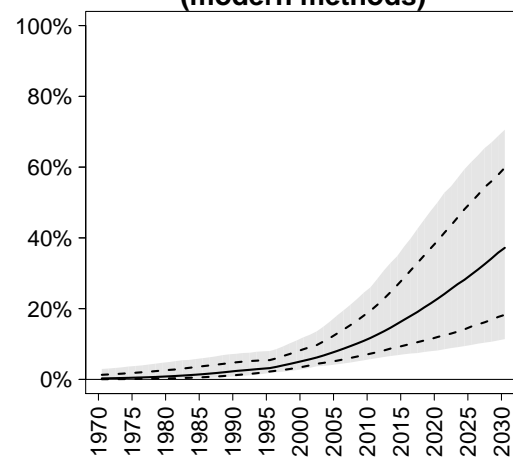

Eswatini --- All women

**CP (any)**

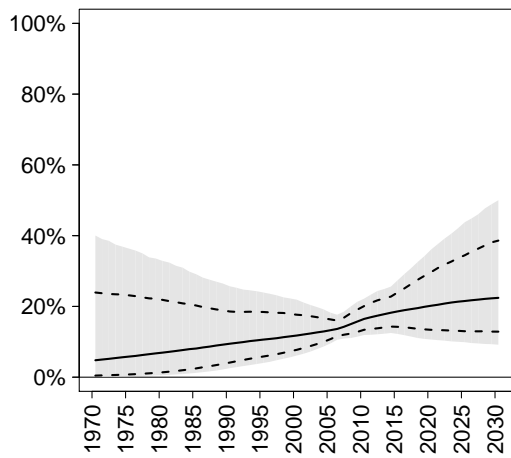

**CP (modern)**

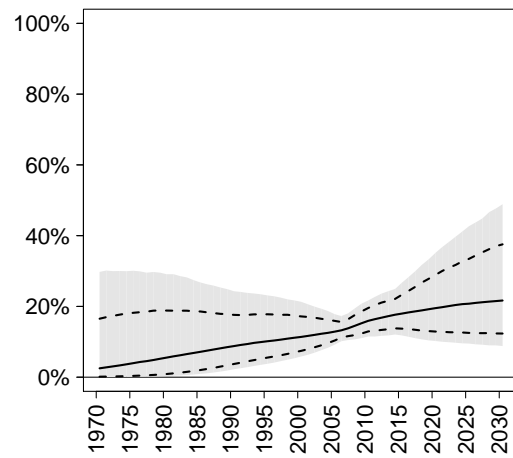

**CP (traditional)**

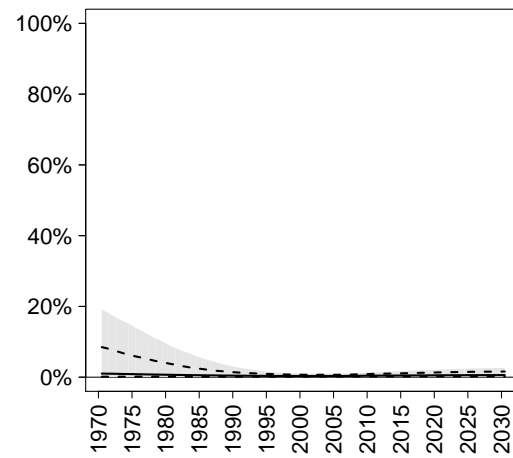

**Unmet need among all unmarried women**

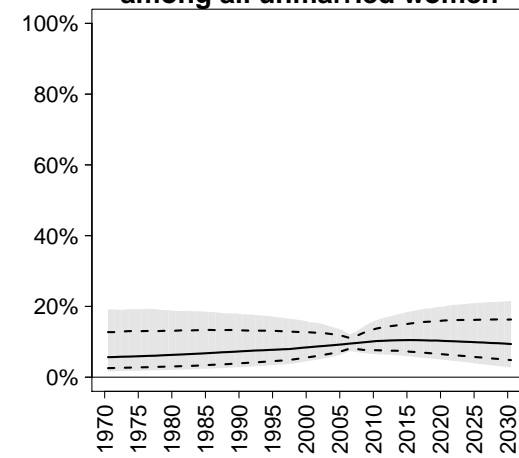

**Total demand**

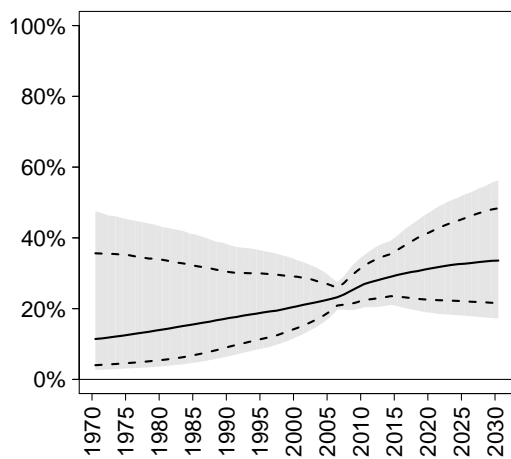

**Demand satisfied (any method)**

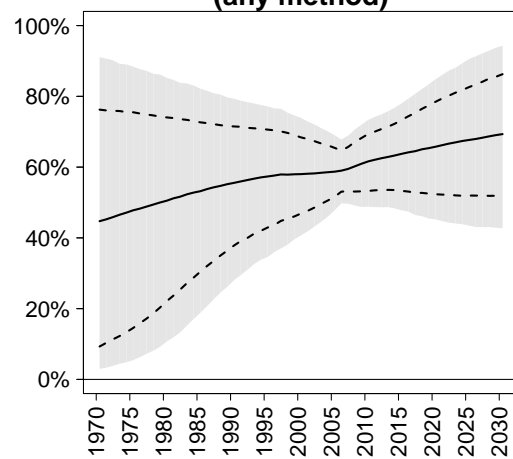

**Demand satisfied (modern methods)**

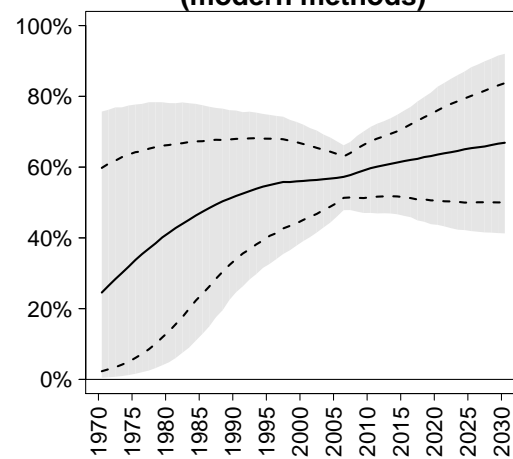

Ethiopia --- All women

**CP (any)**

**CP (modern)**

**CP (traditional)**

**Unmet need  
among all unmarried women**

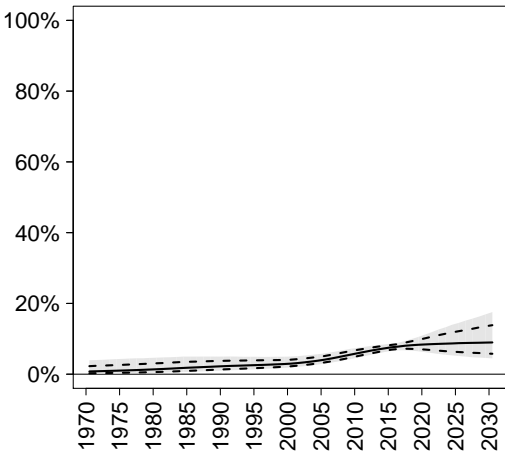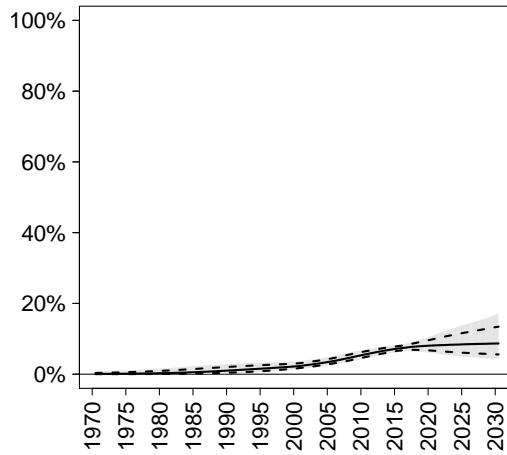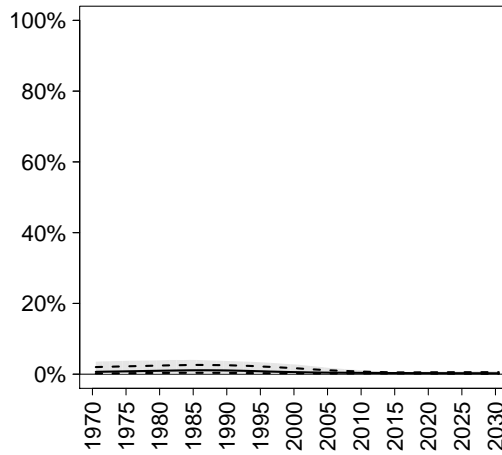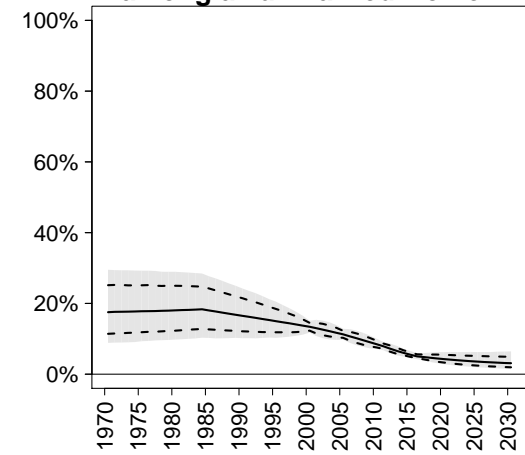

**Total demand**

**Demand satisfied  
(any method)**

**Demand satisfied  
(modern methods)**

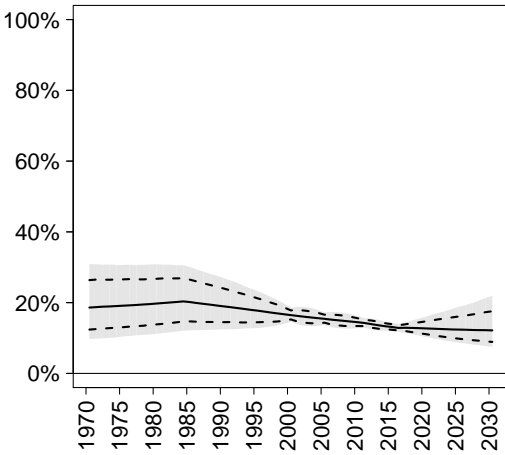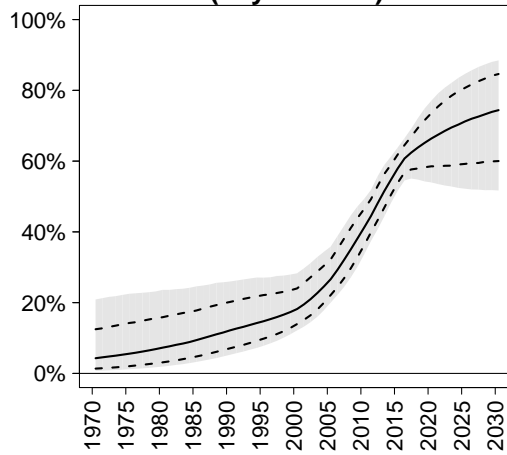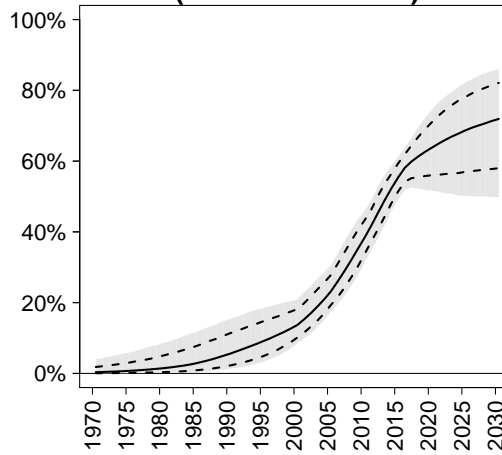

Gabon --- All women

**CP (any)**

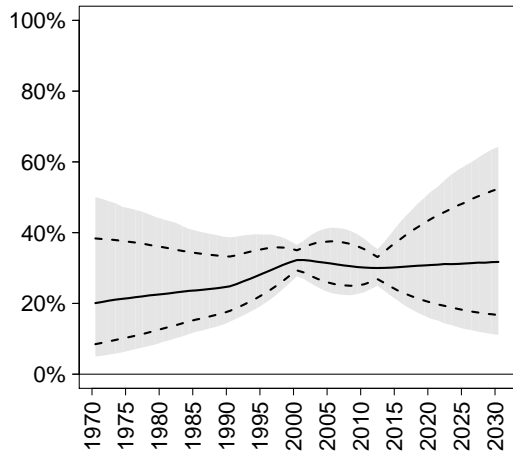

**CP (modern)**

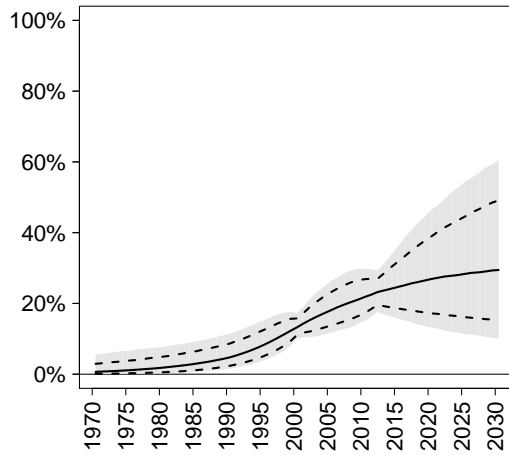

**CP (traditional)**

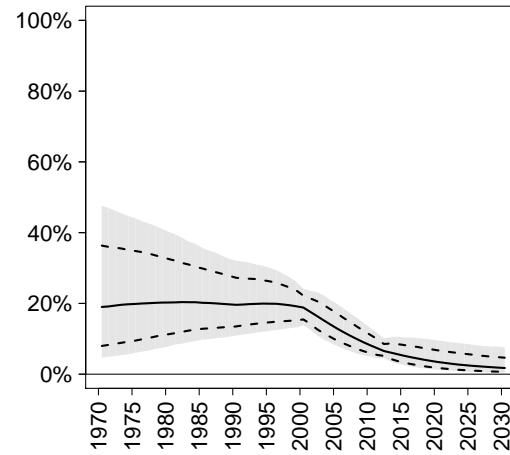

**Unmet need among all unmarried women**

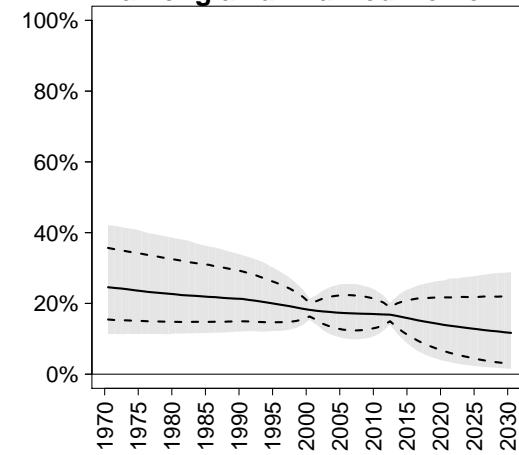

**Total demand**

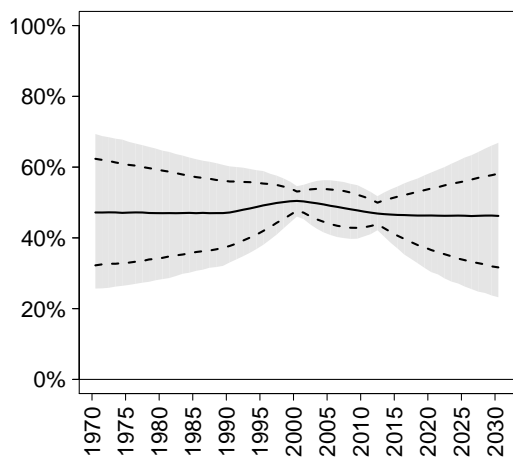

**Demand satisfied (any method)**

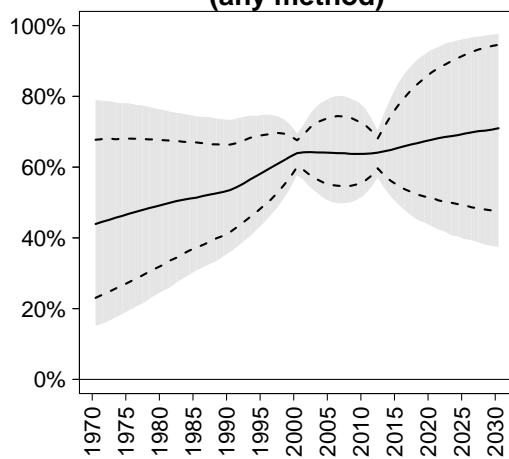

**Demand satisfied (modern methods)**

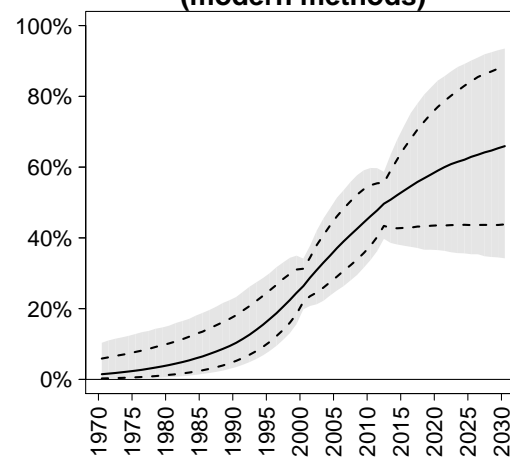

Gambia --- All women

**CP (any)**

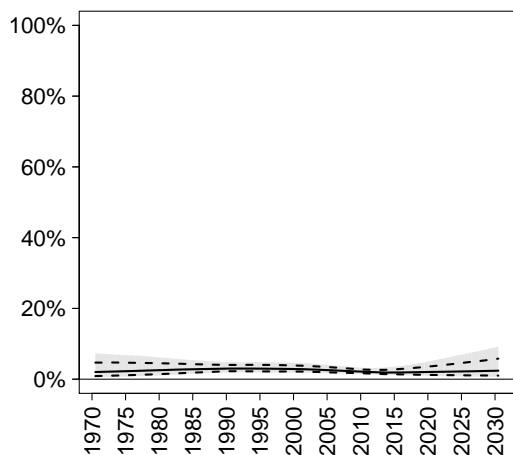

**CP (modern)**

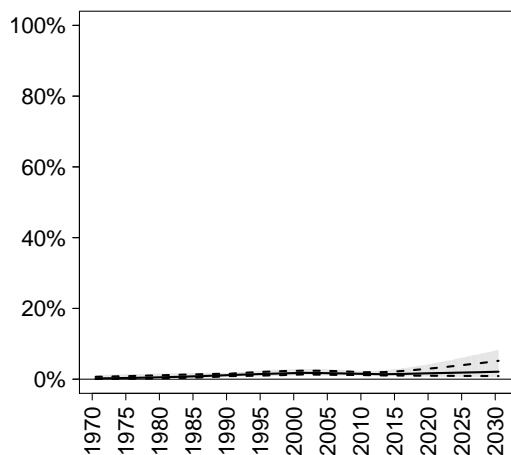

**CP (traditional)**

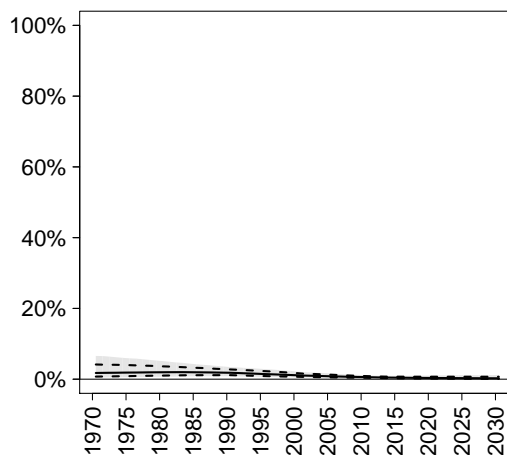

**Unmet need among all unmarried women**

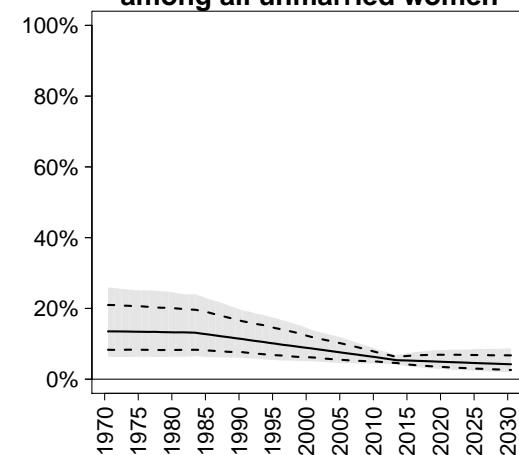

**Total demand**

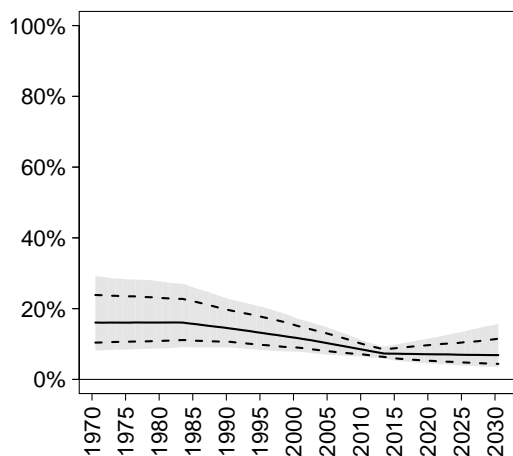

**Demand satisfied (any method)**

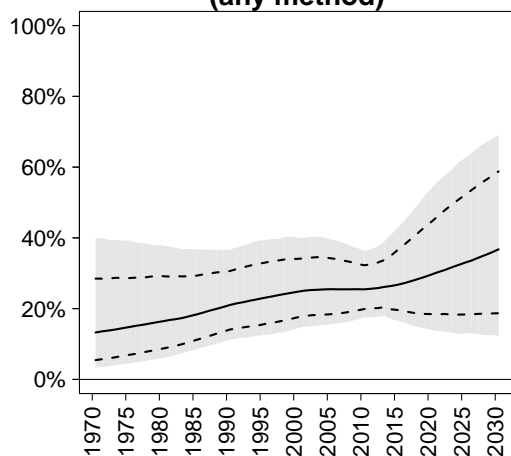

**Demand satisfied (modern methods)**

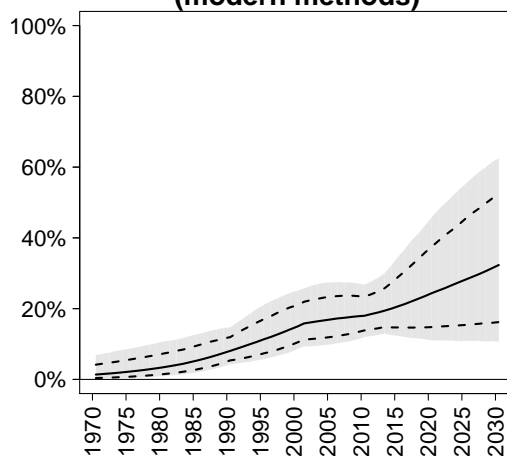

Ghana --- All women

**CP (any)**

**CP (modern)**

**CP (traditional)**

**Unmet need  
among all unmarried women**

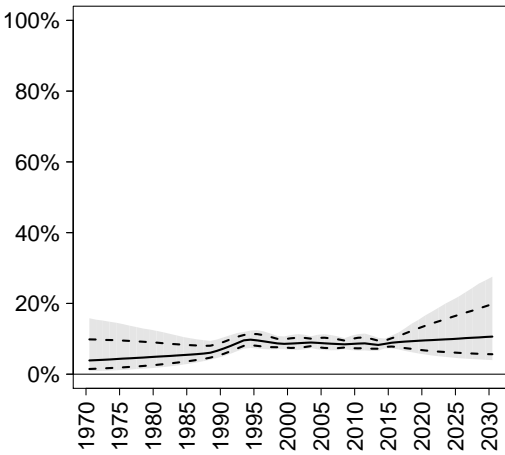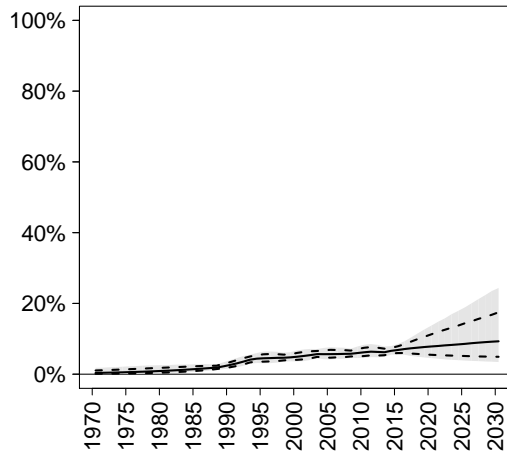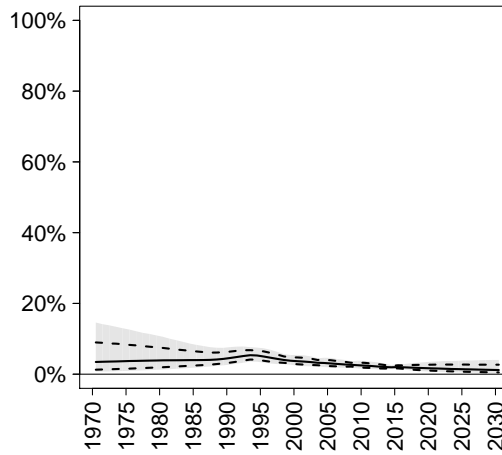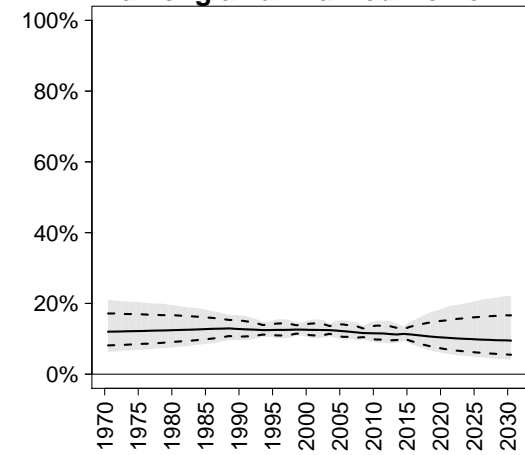

**Total demand**

**Demand satisfied  
(any method)**

**Demand satisfied  
(modern methods)**

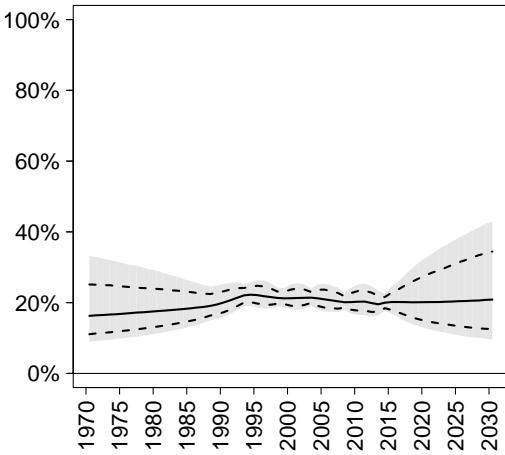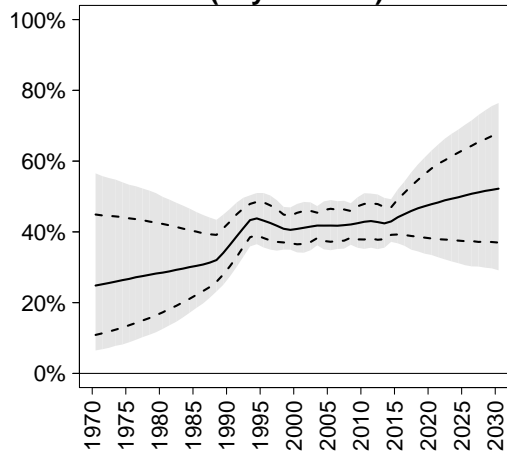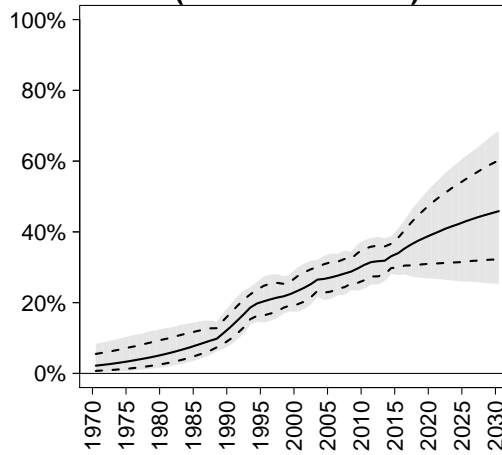



Guatemala --- All women

CP (any)

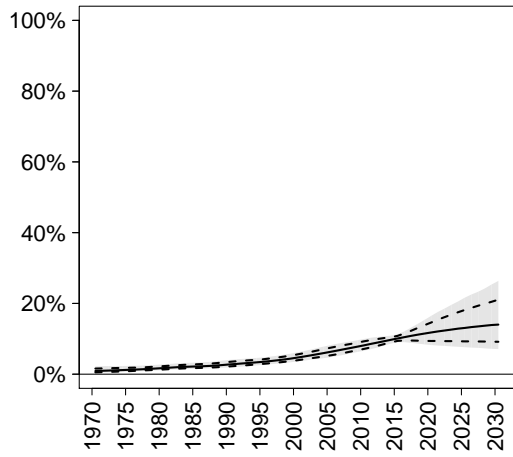

CP (modern)

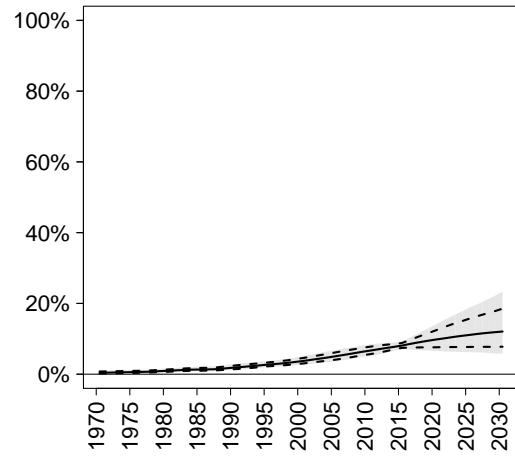

CP (traditional)

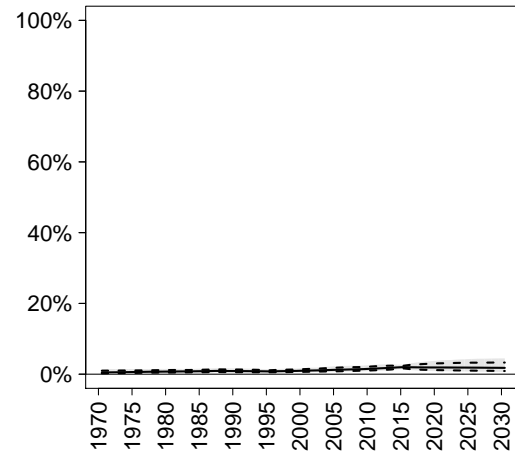

Unmet need among all unmarried women

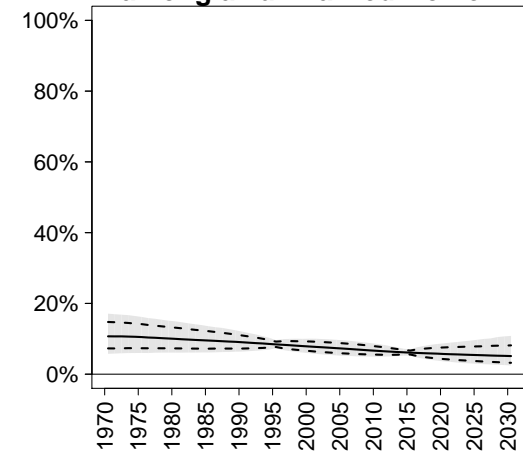

Total demand

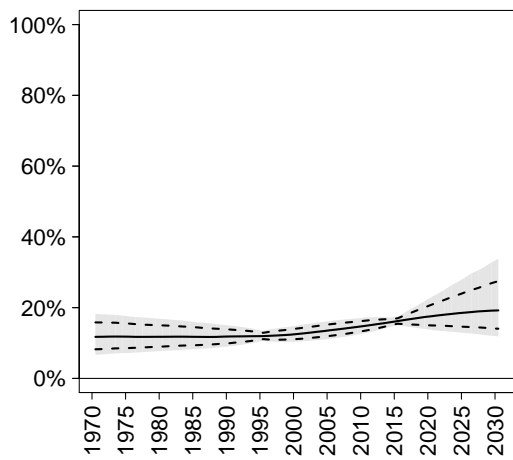

Guinea --- All women

CP (any)

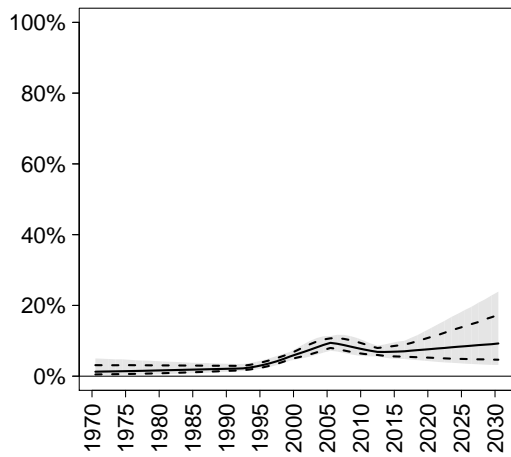

CP (modern)

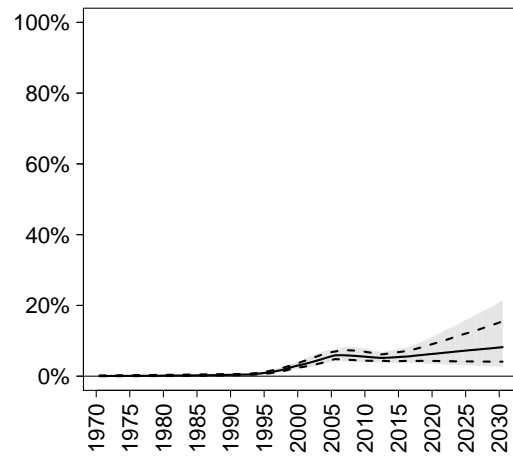

CP (traditional)

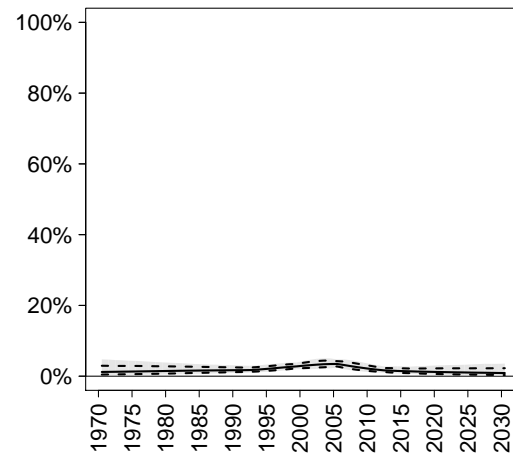

Unmet need among all unmarried women

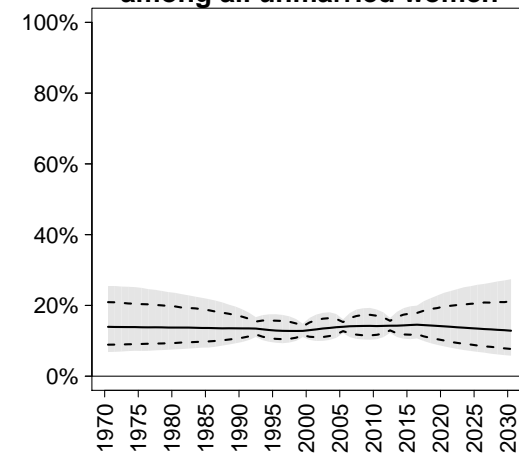

Total demand

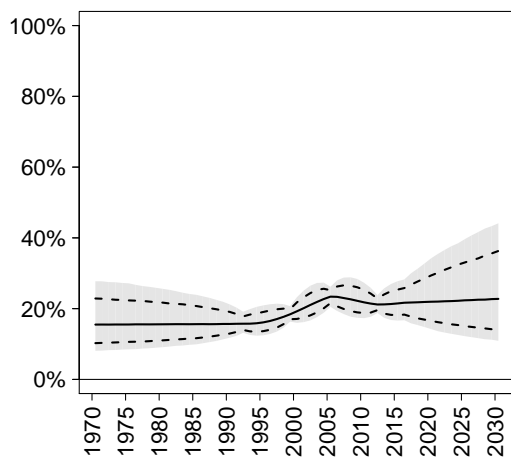

Demand satisfied (any method)

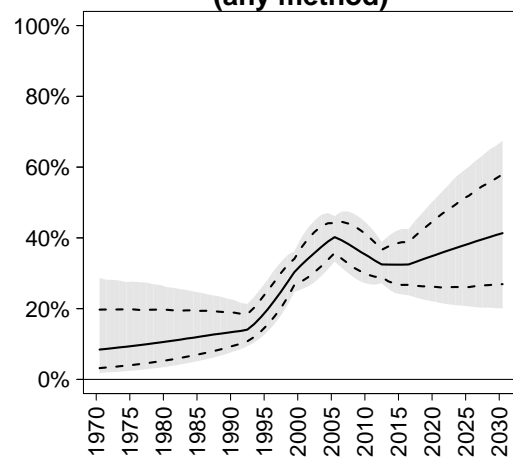

Demand satisfied (modern methods)

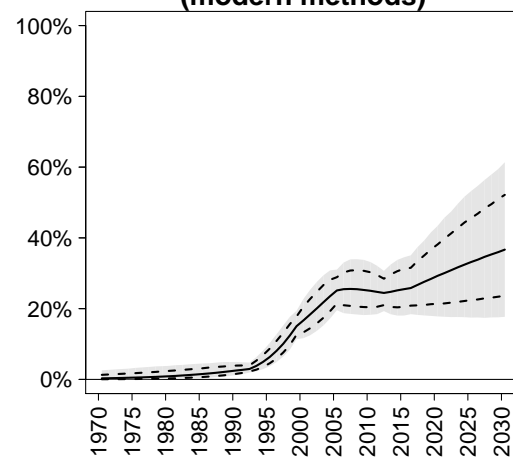

Guinea-Bissau --- All women

CP (any)

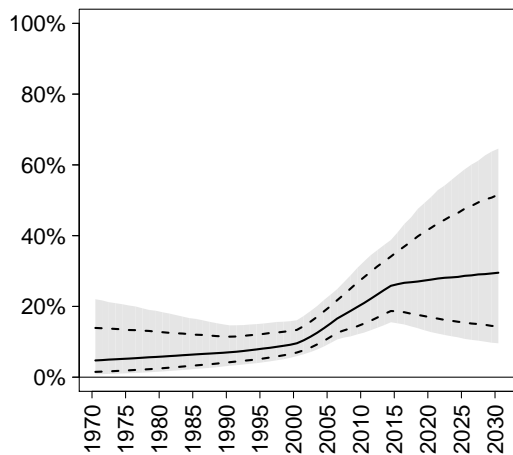

CP (modern)

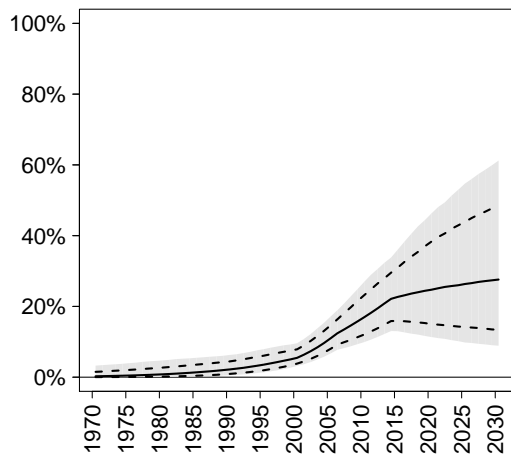

CP (traditional)

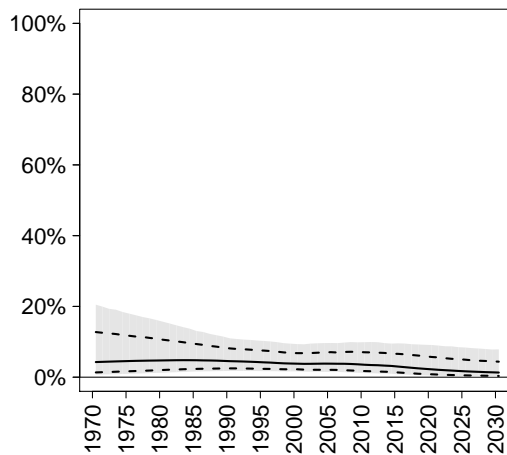

Unmet need among all unmarried women

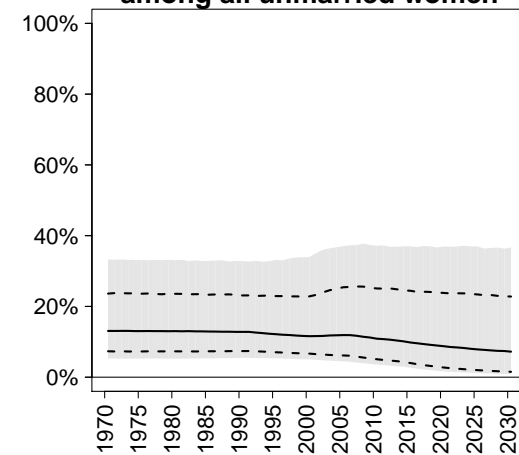

Total demand

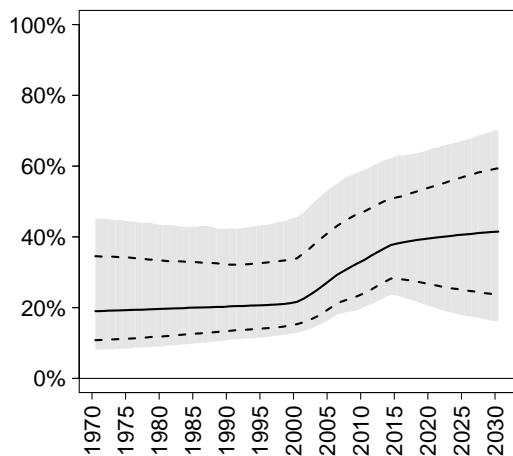

Demand satisfied (any method)

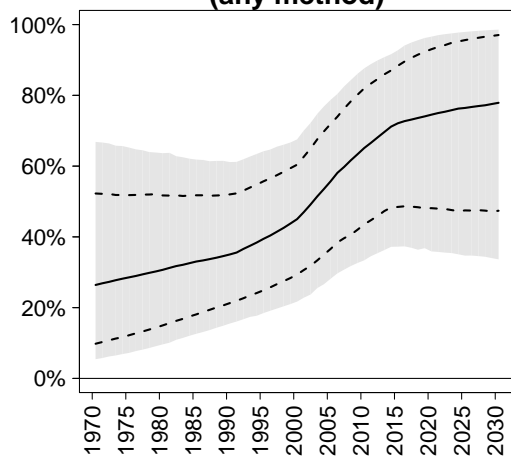

Demand satisfied (modern methods)

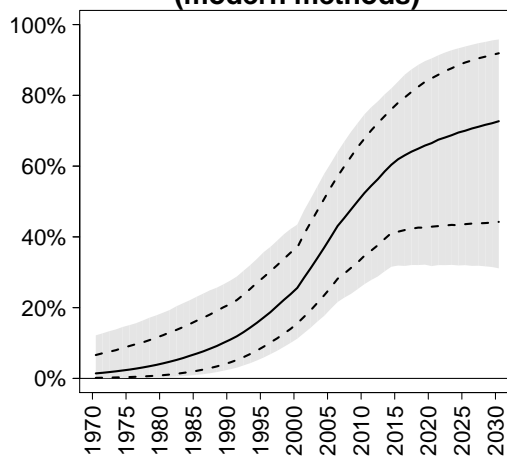

Guyana --- All women

**CP (any)**

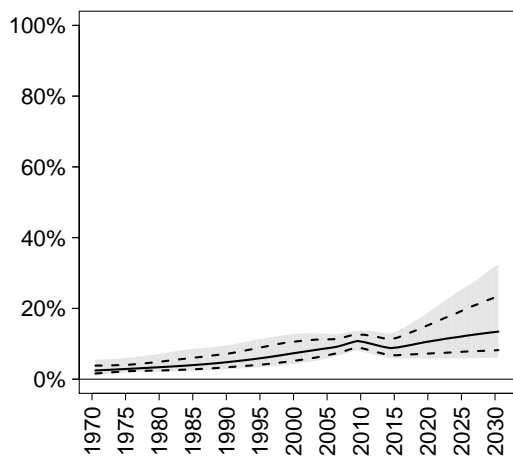

**CP (modern)**

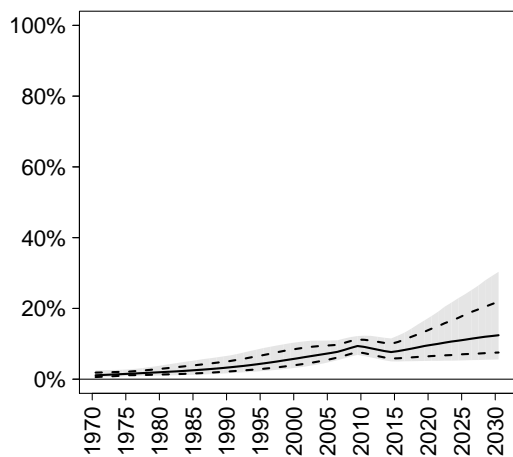

**CP (traditional)**

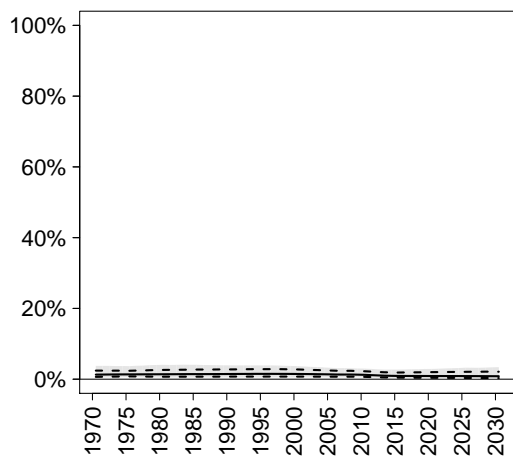

**Unmet need among all unmarried women**

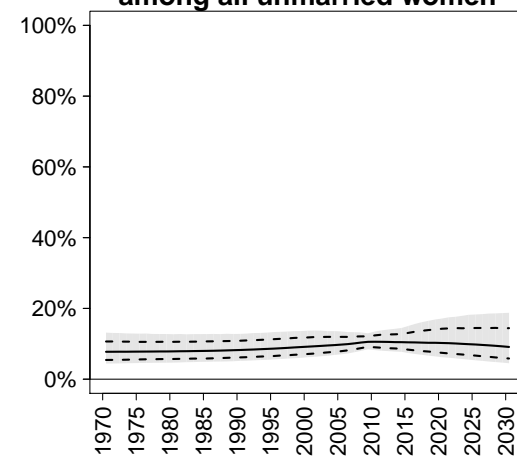

**Total demand**

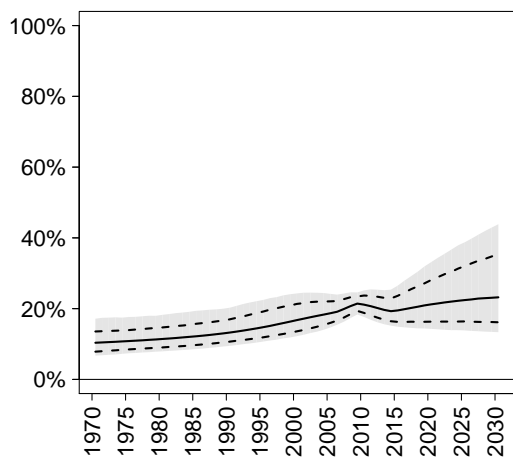

**Demand satisfied (any method)**

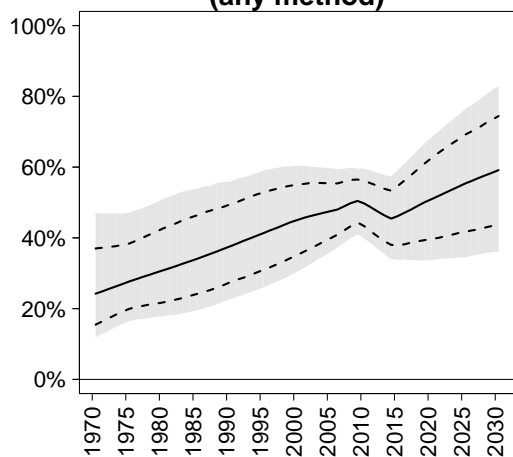

**Demand satisfied (modern methods)**

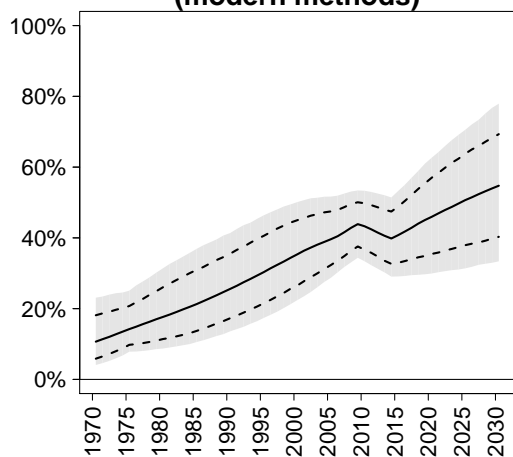

Haiti --- All women

**CP (any)**

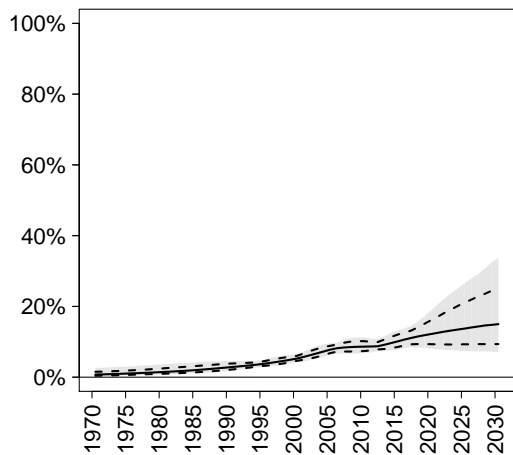

**CP (modern)**

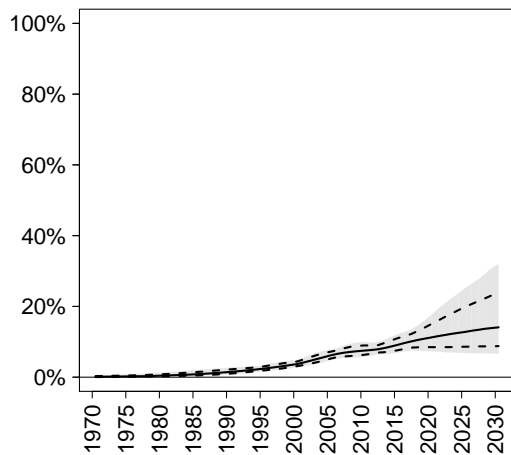

**CP (traditional)**

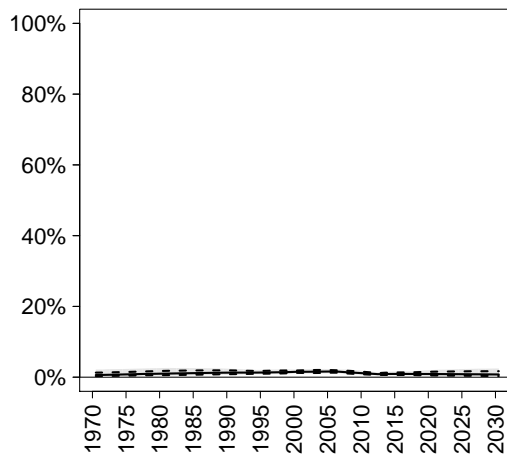

**Unmet need among all unmarried women**

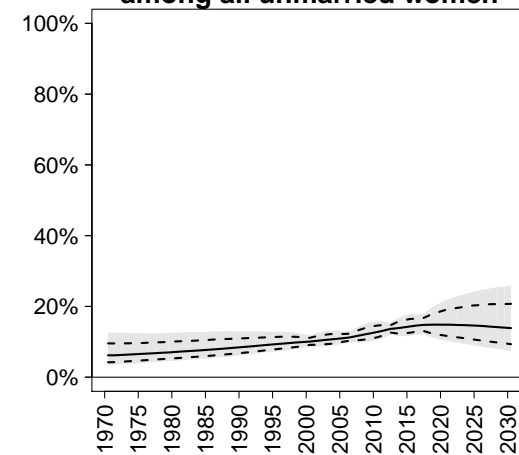

**Total demand**

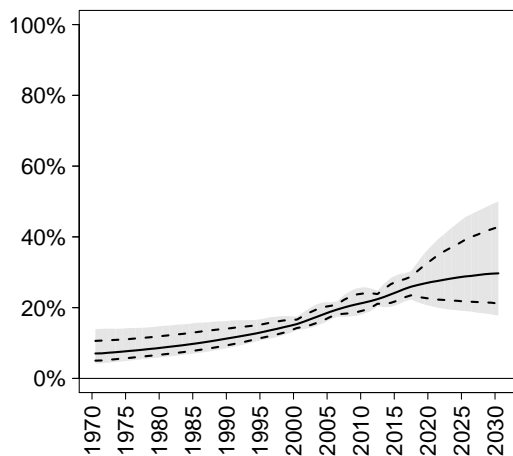

**Demand satisfied (any method)**

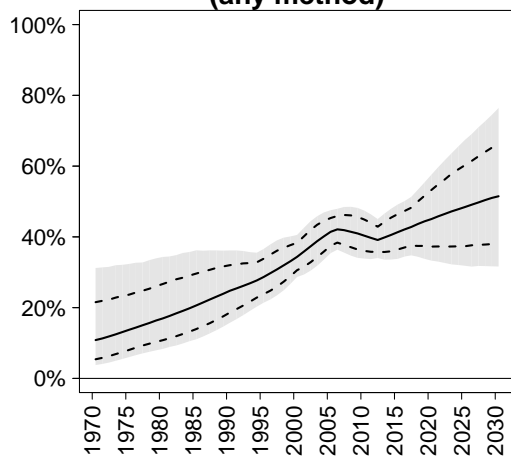

**Demand satisfied (modern methods)**

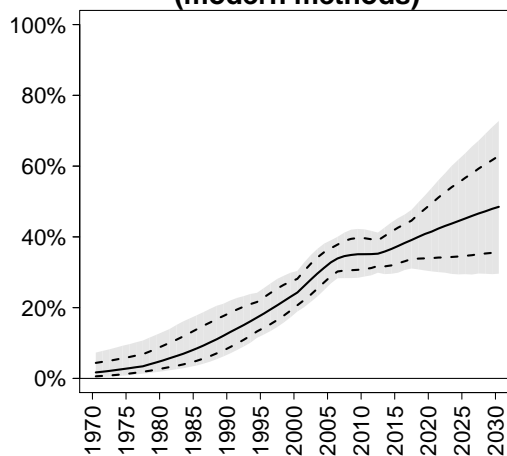

Honduras --- All women

**CP (any)**

**CP (modern)**

**CP (traditional)**

**Unmet need  
among all unmarried women**

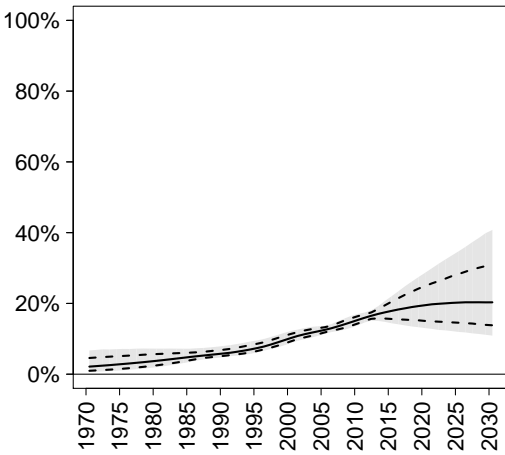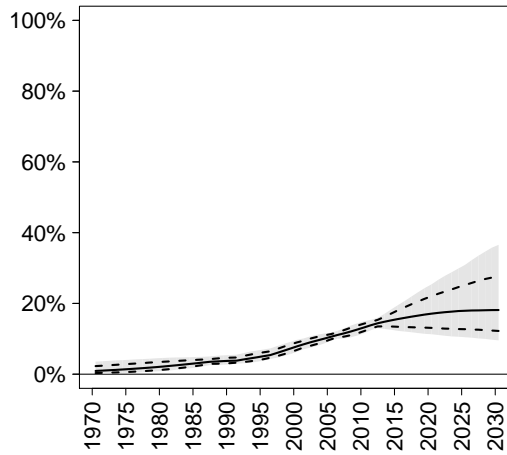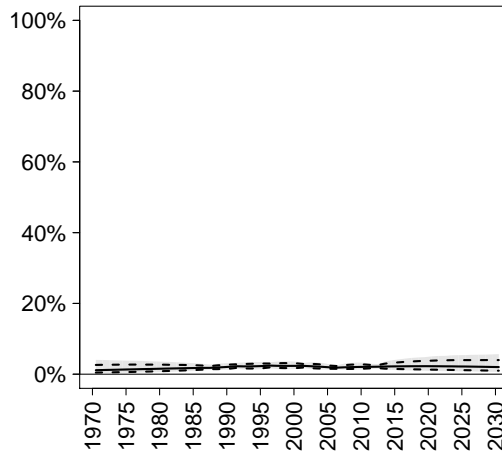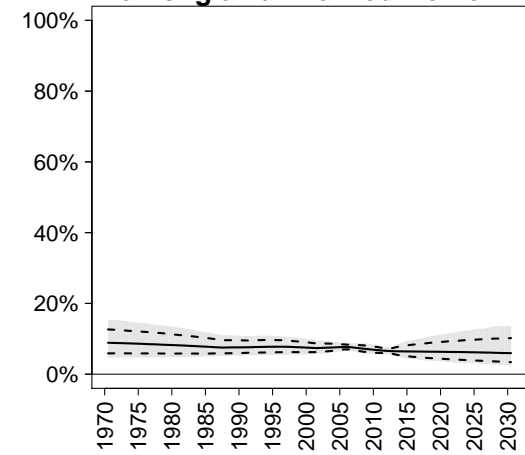

**Total demand**

**Demand satisfied  
(any method)**

**Demand satisfied  
(modern methods)**

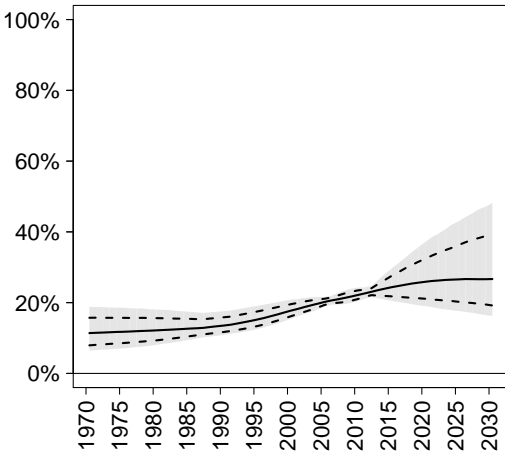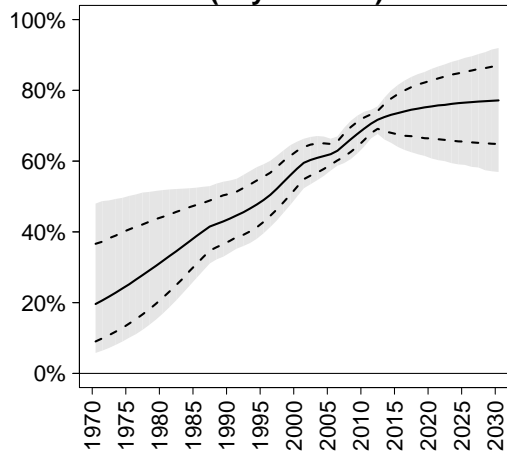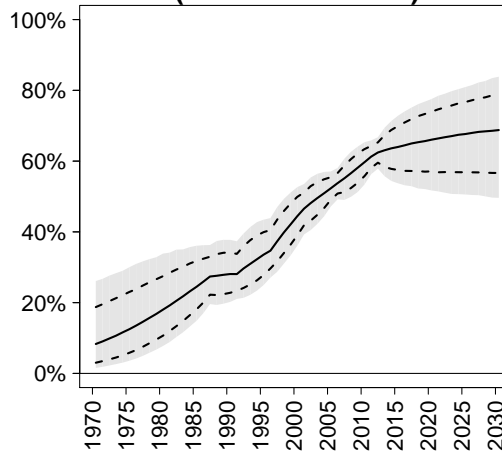

India --- All women

**CP (any)**

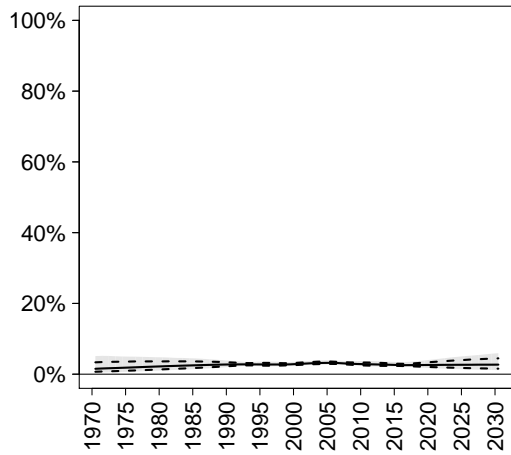

**CP (modern)**

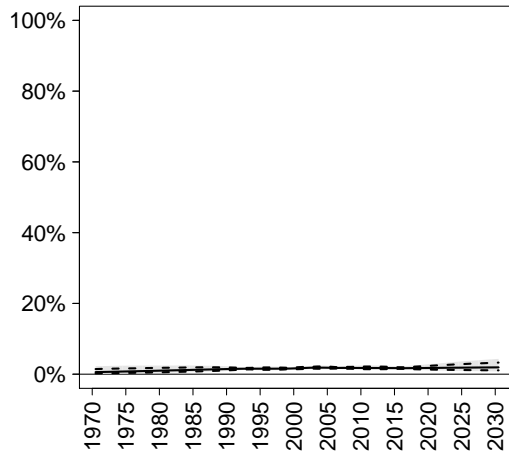

**CP (traditional)**

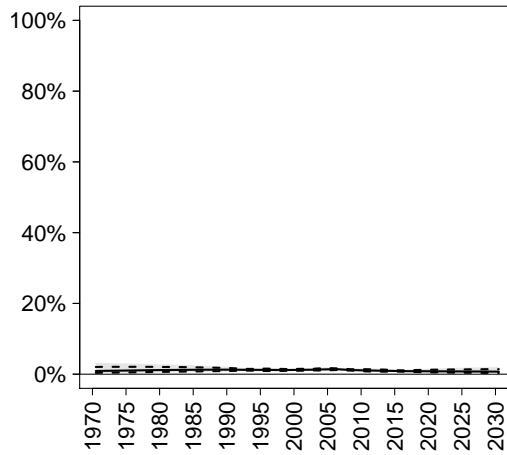

**Unmet need among all unmarried women**

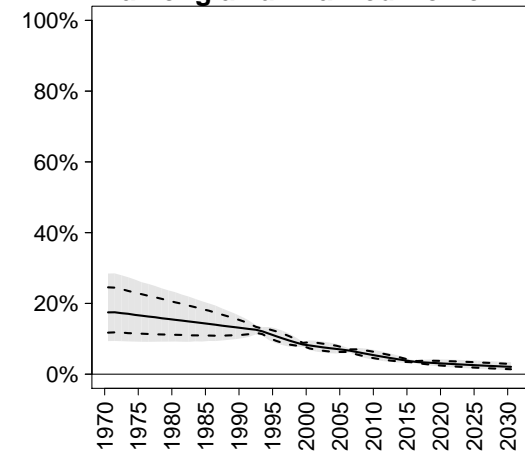

**Total demand**

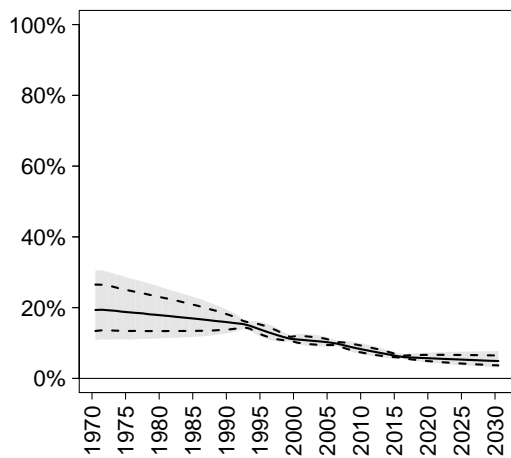

**Demand satisfied (any method)**

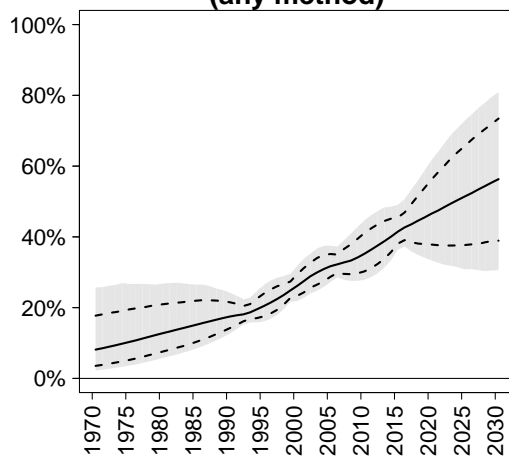

**Demand satisfied (modern methods)**

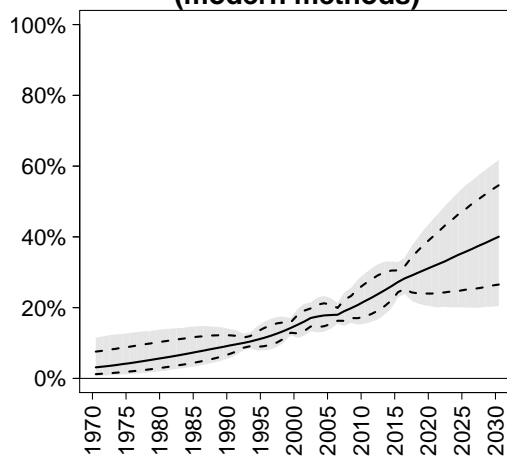

Indonesia --- All women

**CP (any)**

**CP (modern)**

**CP (traditional)**

**Unmet need  
among all unmarried women**

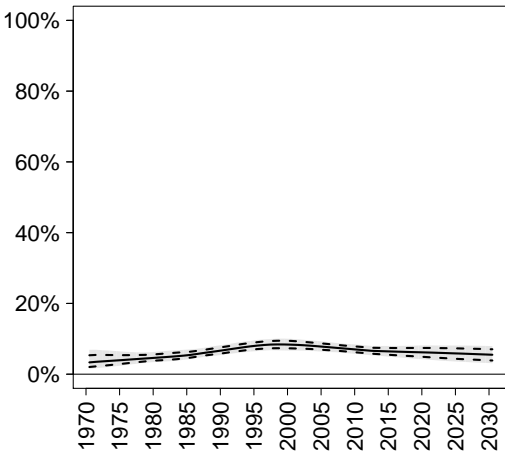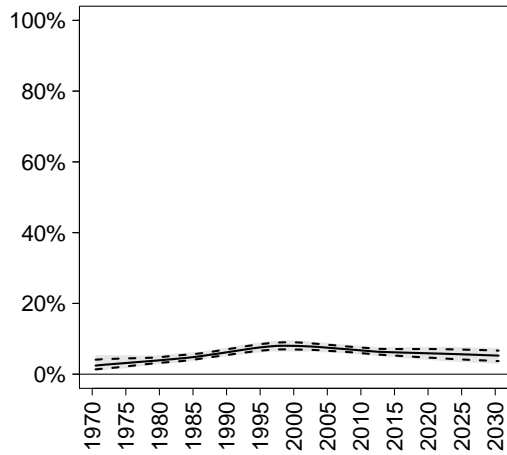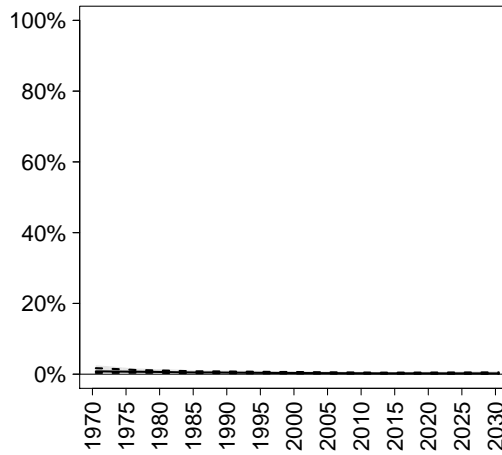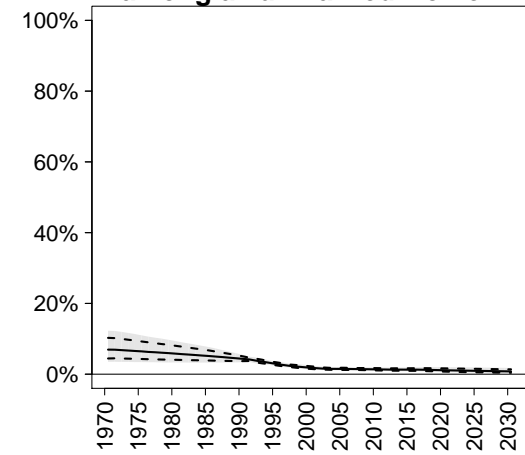

**Total demand**

**Demand satisfied  
(any method)**

**Demand satisfied  
(modern methods)**

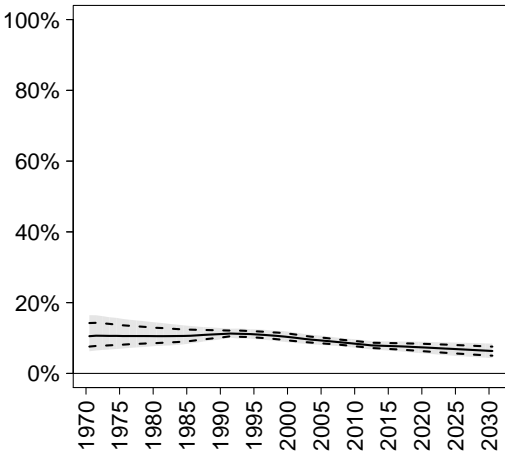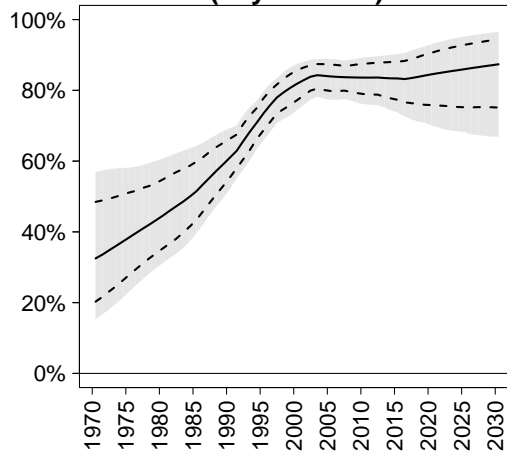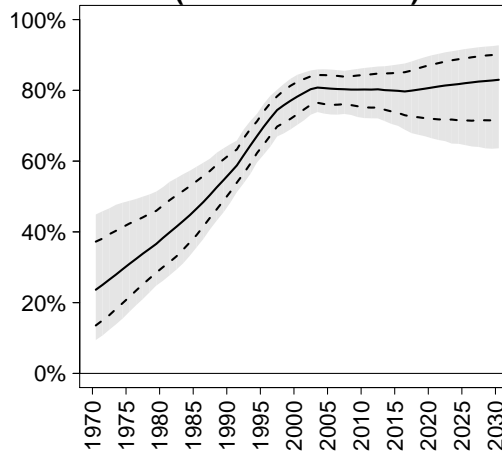



Jamaica --- All women

CP (any)

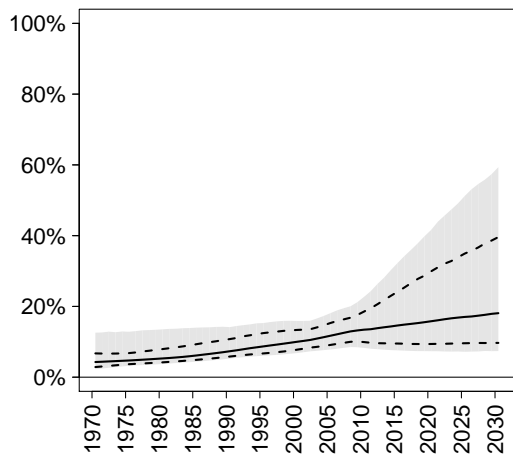

CP (modern)

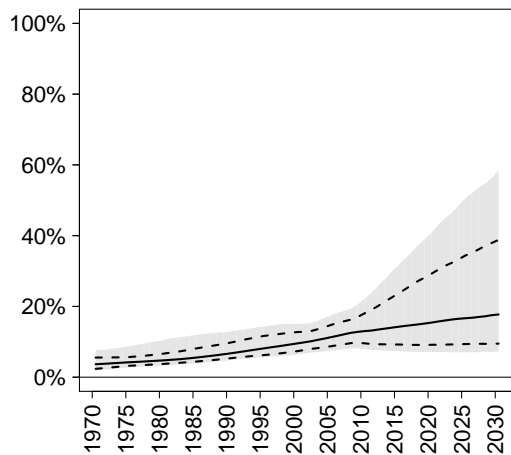

CP (traditional)

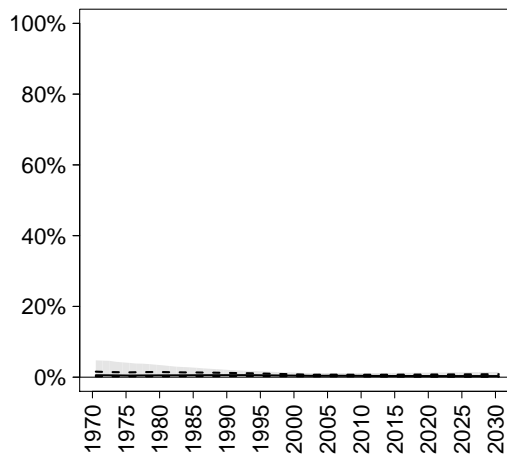

Unmet need among all unmarried women

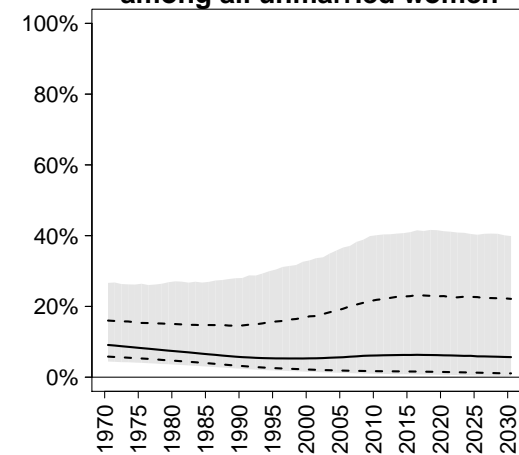

Total demand

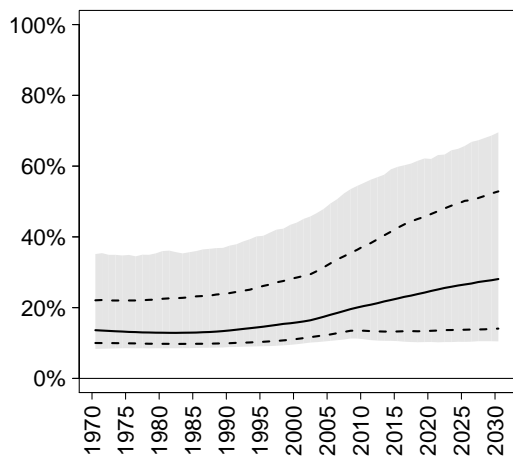

Demand satisfied (any method)

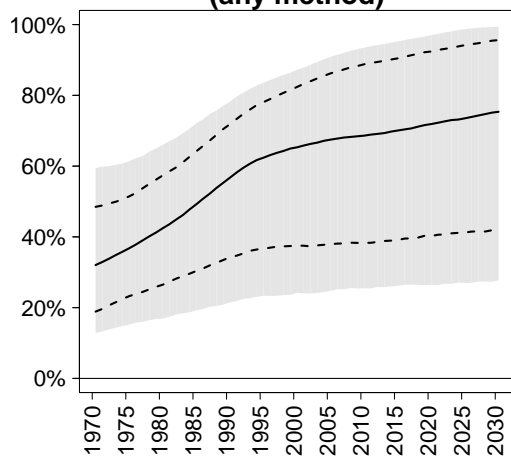

Demand satisfied (modern methods)

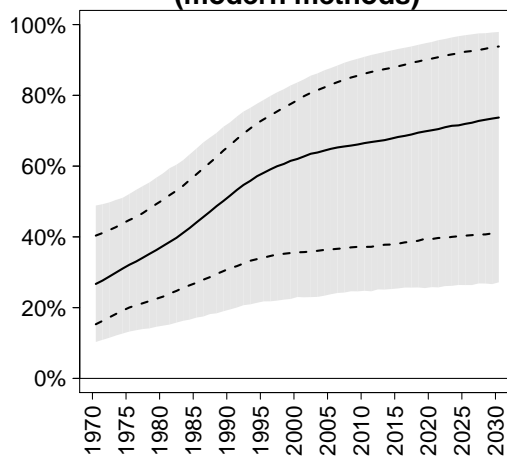

Kazakhstan --- All women

**CP (any)**

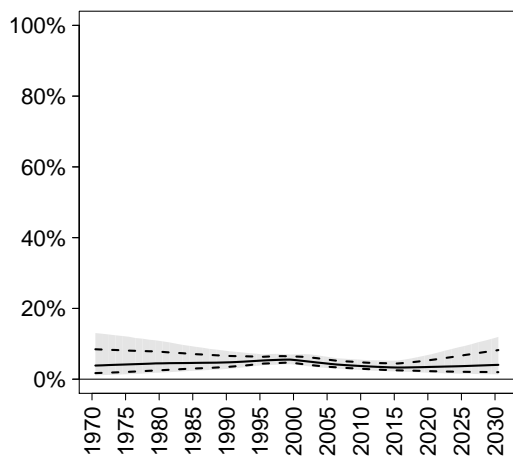

**CP (modern)**

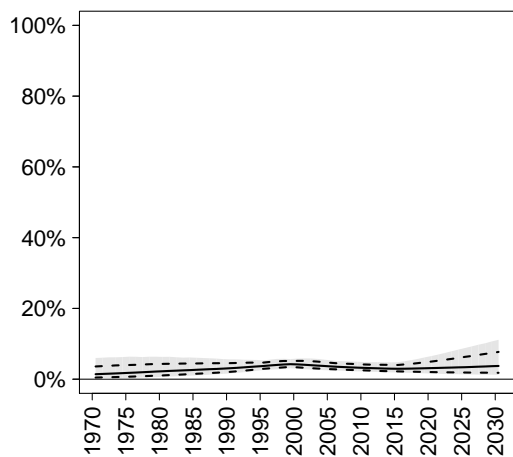

**CP (traditional)**

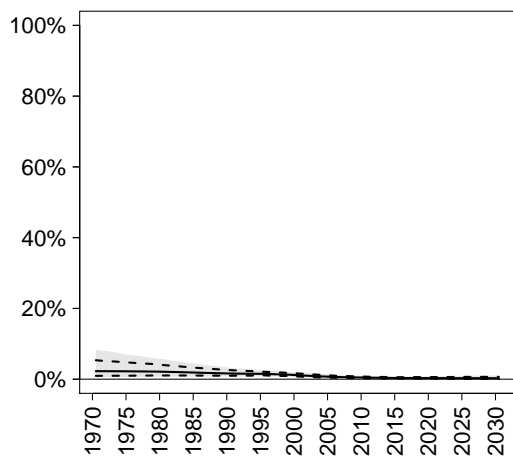

**Unmet need among all unmarried women**

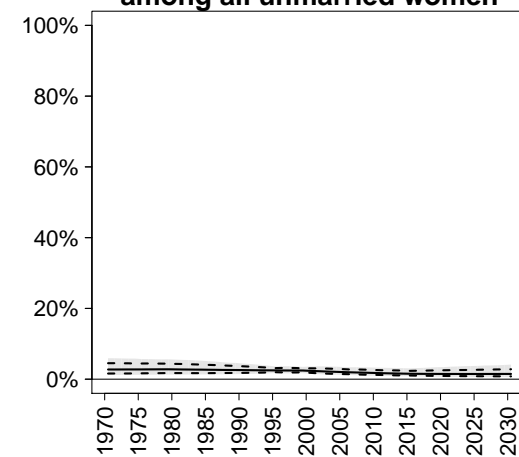

**Total demand**

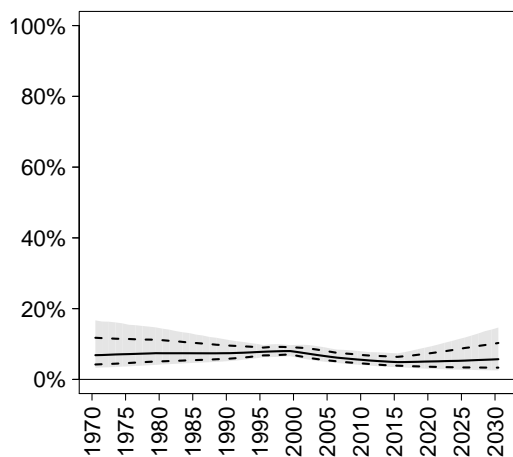

**Demand satisfied (any method)**

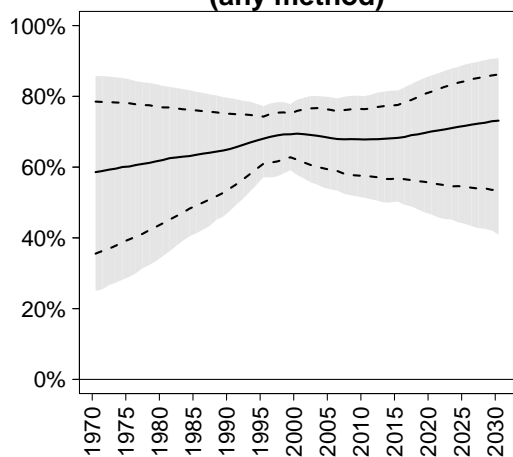

**Demand satisfied (modern methods)**

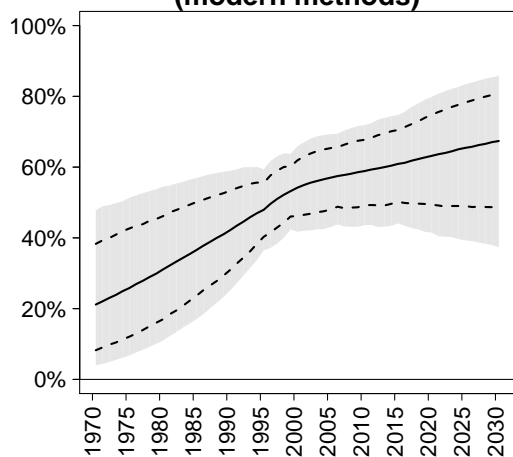

Kenya ---- All women

**CP (any)**

**CP (modern)**

**CP (traditional)**

**Unmet need  
among all unmarried women**

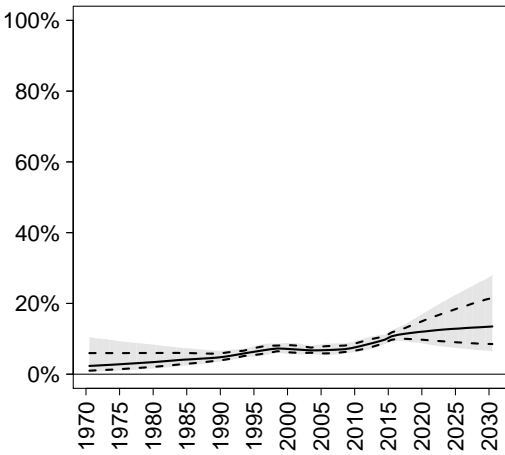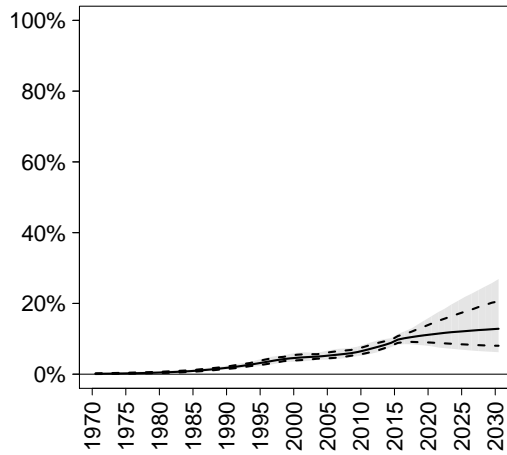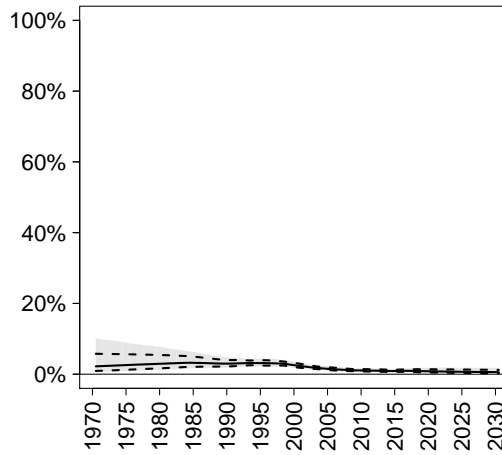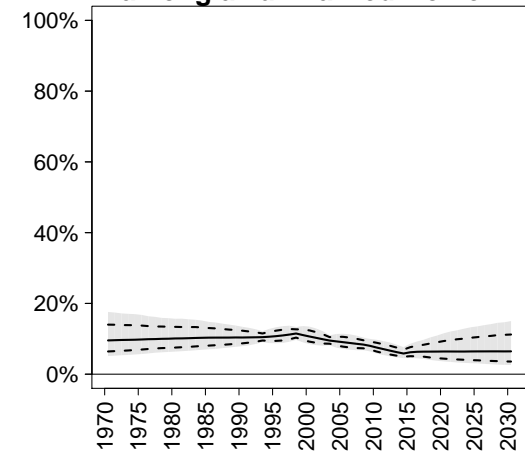

**Total demand**

**Demand satisfied  
(any method)**

**Demand satisfied  
(modern methods)**

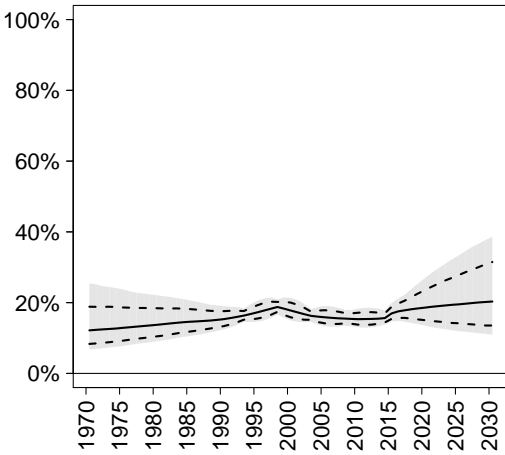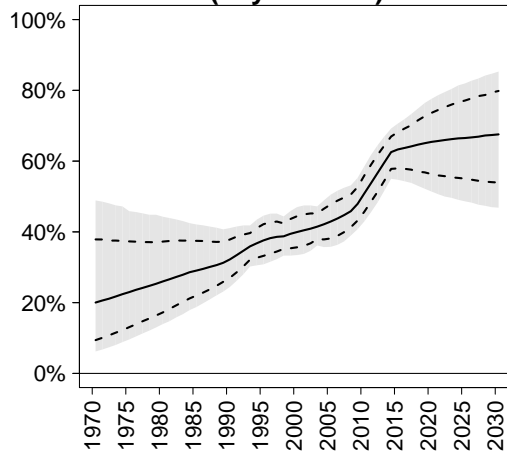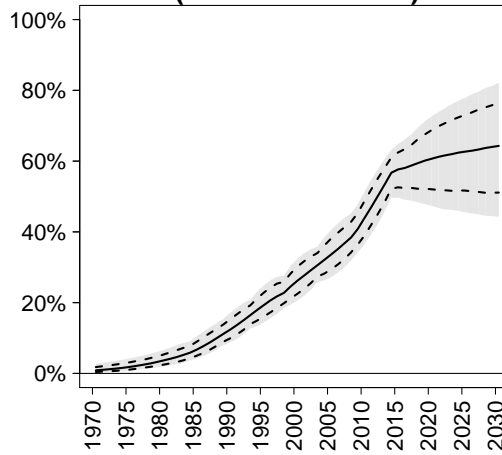

Kyrgyzstan --- All women

**CP (any)**

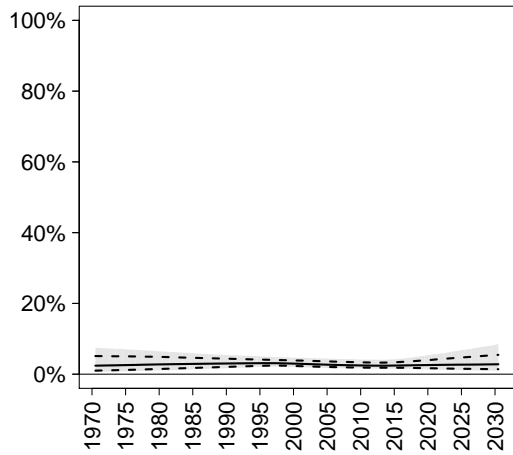

**CP (modern)**

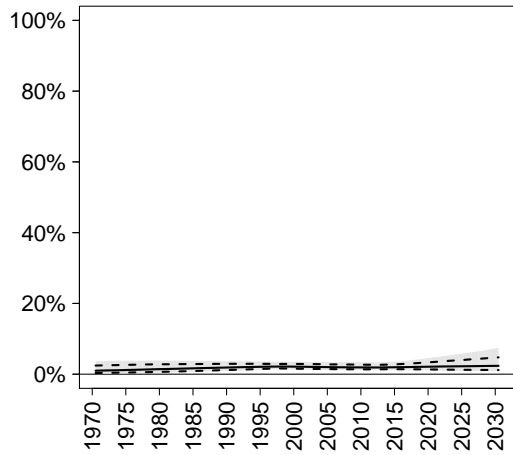

**CP (traditional)**

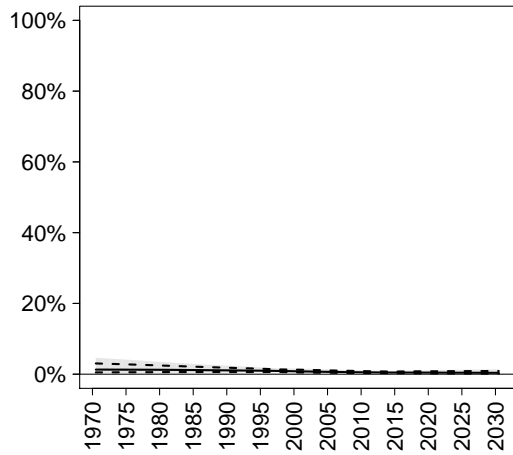

**Unmet need among all unmarried women**

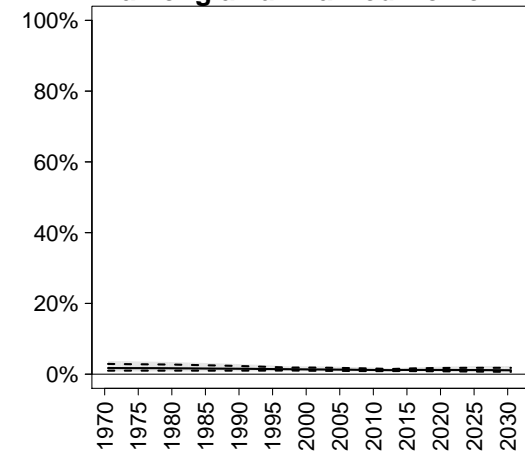

**Total demand**

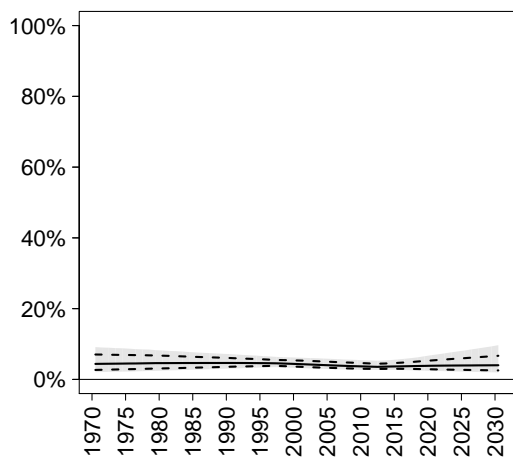

**Demand satisfied (any method)**

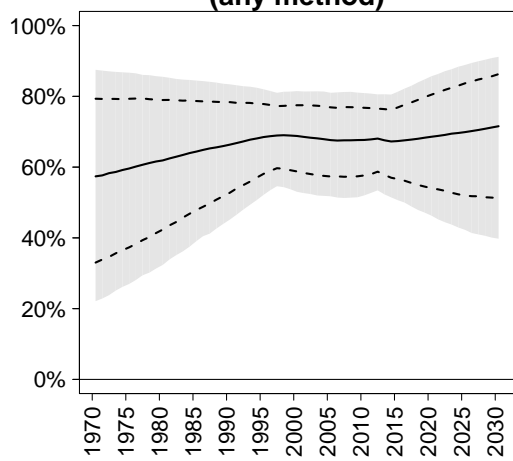

**Demand satisfied (modern methods)**

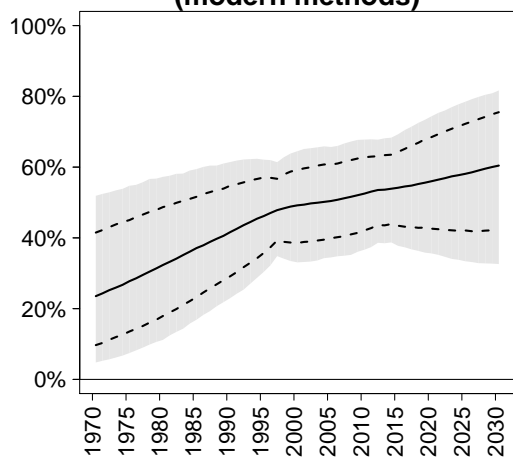

Lesotho --- All women

**CP (any)**

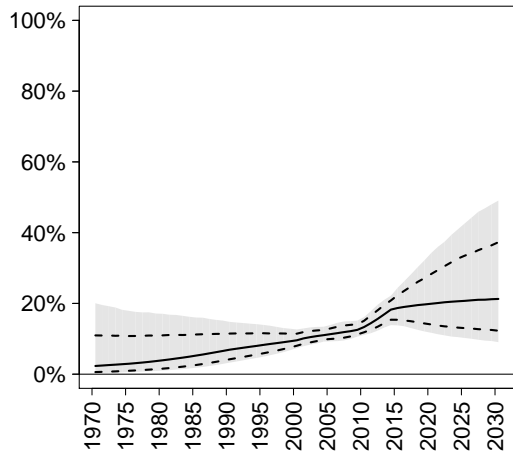

**CP (modern)**

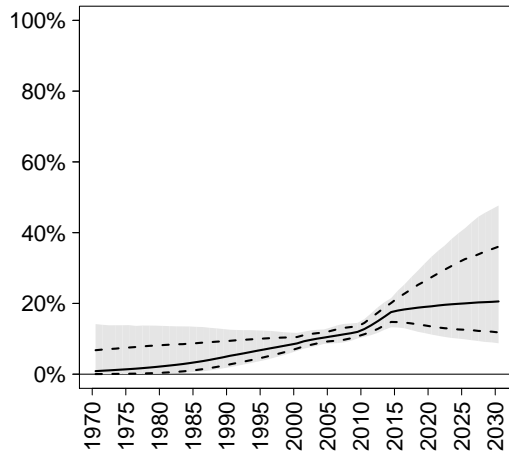

**CP (traditional)**

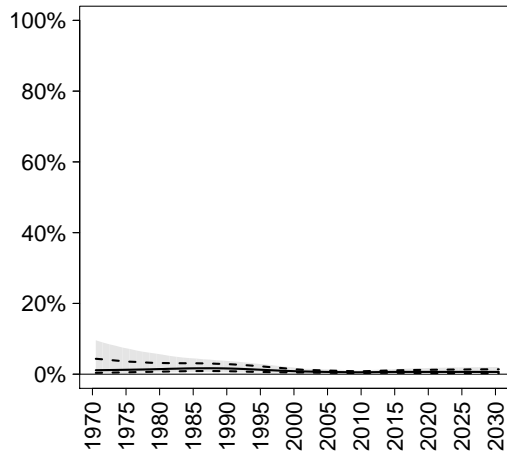

**Unmet need among all unmarried women**

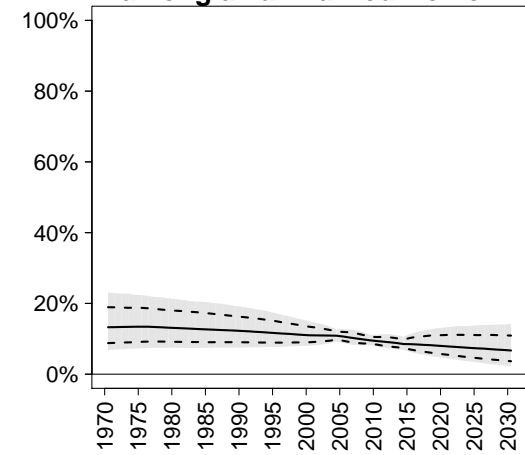

**Total demand**

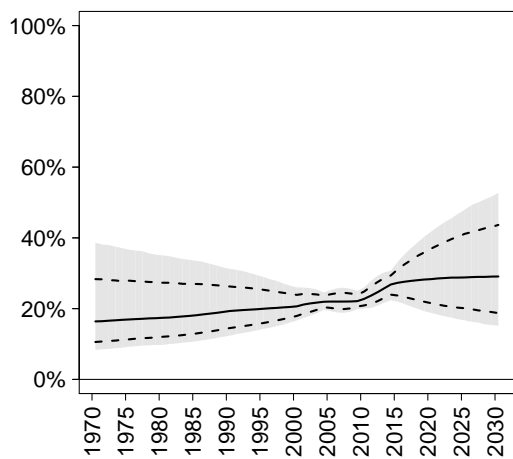

**Demand satisfied (any method)**

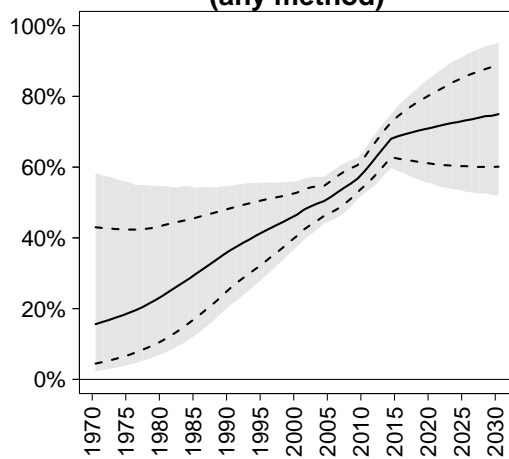

**Demand satisfied (modern methods)**

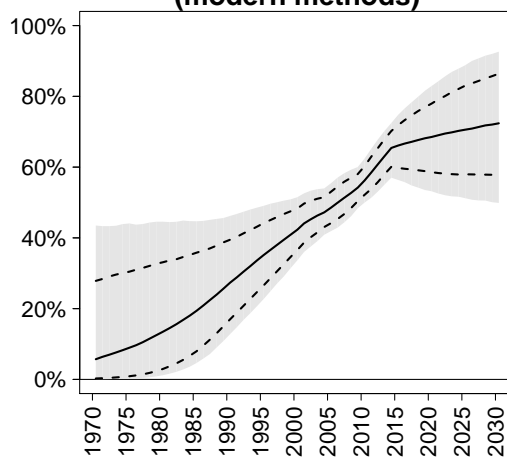

Liberia --- All women

**CP (any)**

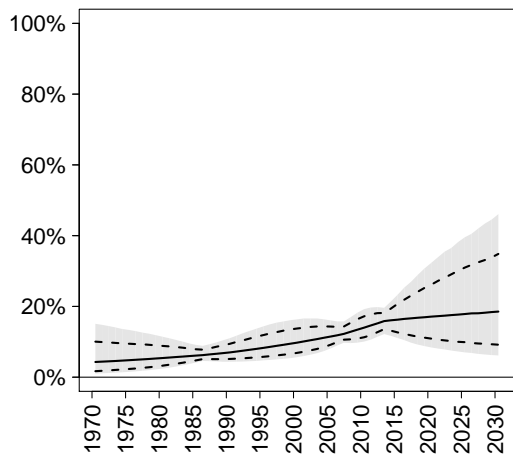

**CP (modern)**

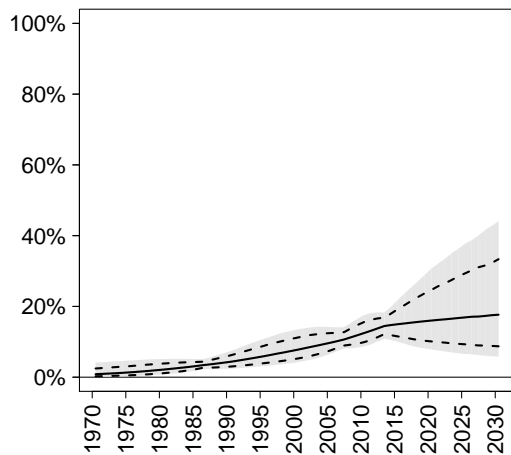

**CP (traditional)**

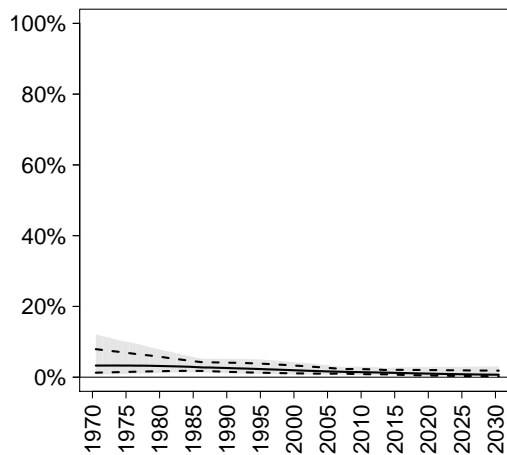

**Unmet need among all unmarried women**

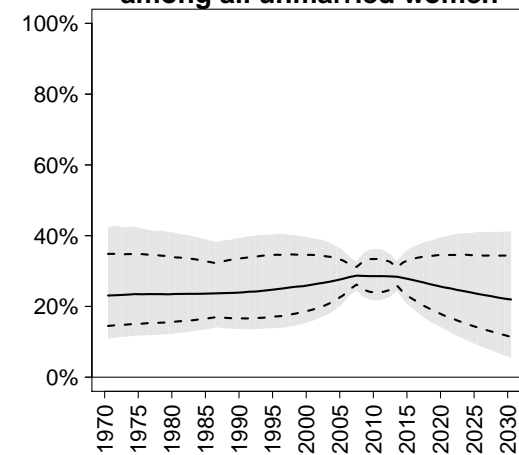

**Total demand**

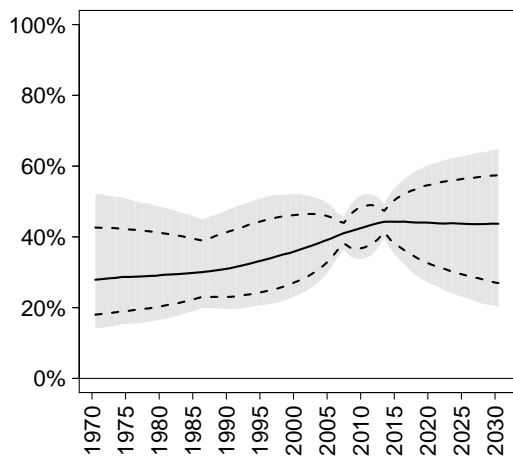

**Demand satisfied (any method)**

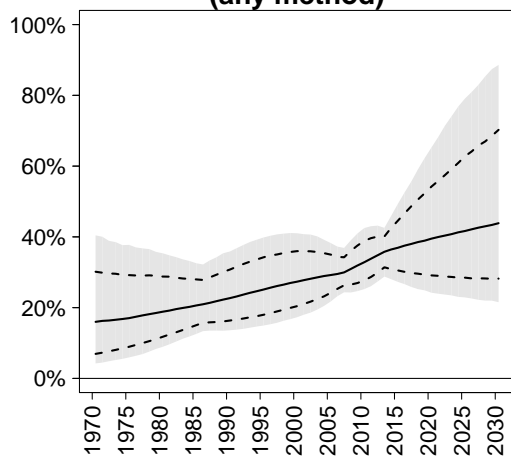

**Demand satisfied (modern methods)**

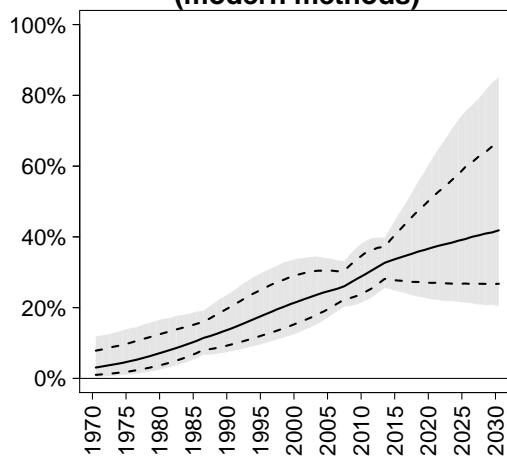

Madagascar --- All women

**CP (any)**

**CP (modern)**

**CP (traditional)**

**Unmet need  
among all unmarried women**

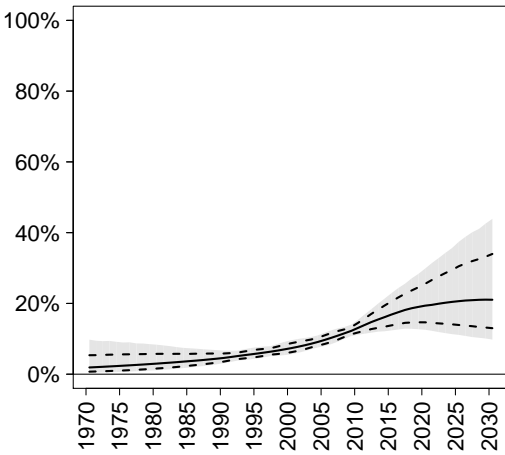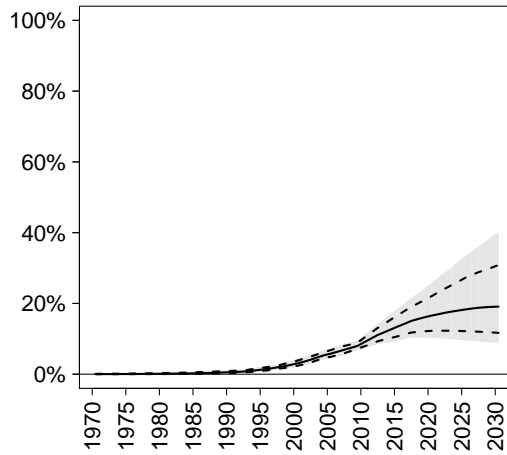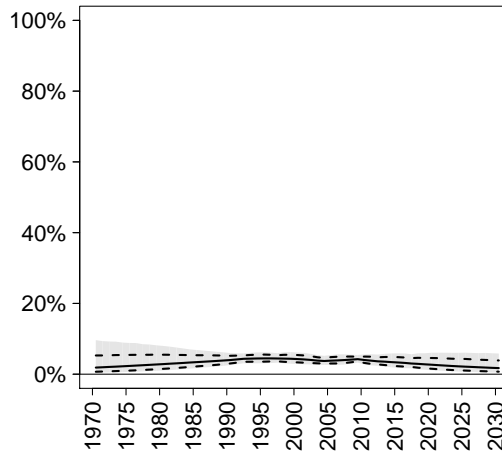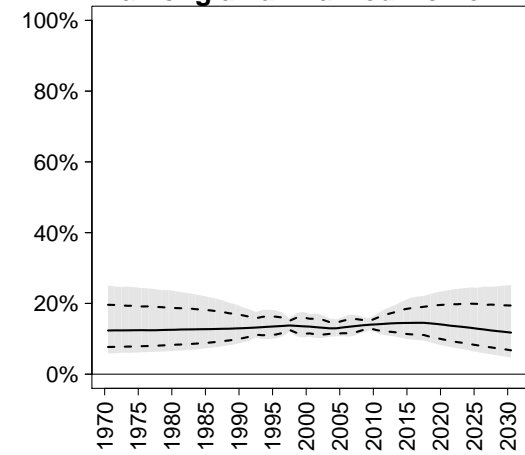

**Total demand**

**Demand satisfied  
(any method)**

**Demand satisfied  
(modern methods)**

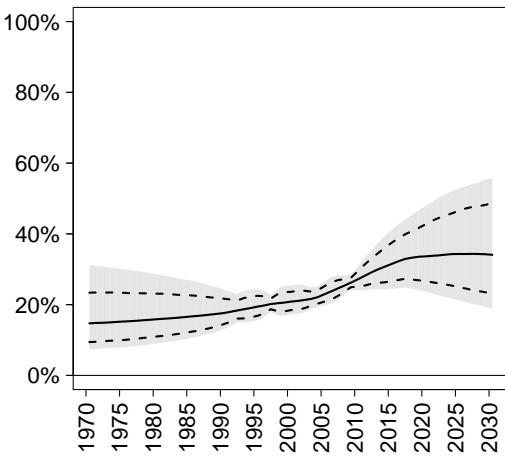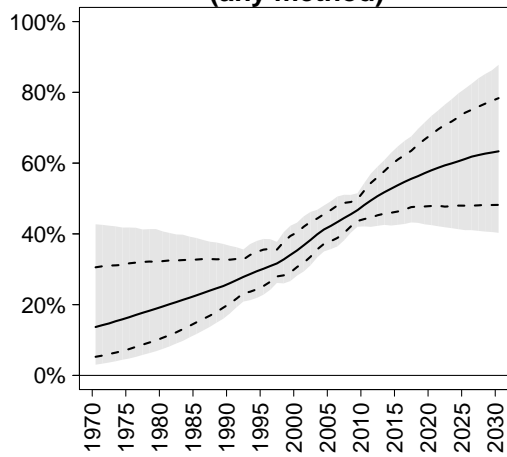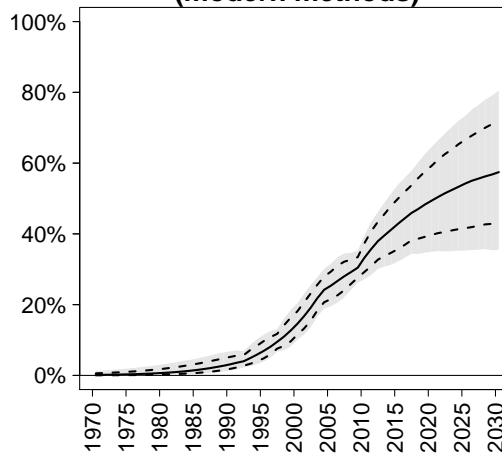

Malawi --- All women

CP (any)

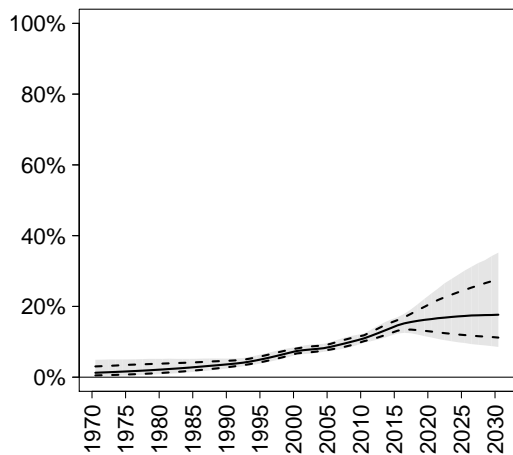

CP (modern)

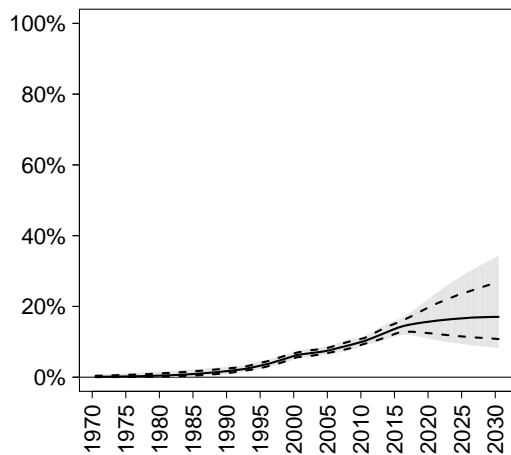

CP (traditional)

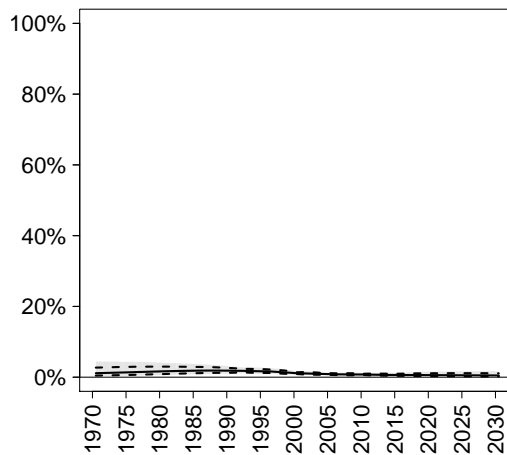

Unmet need among all unmarried women

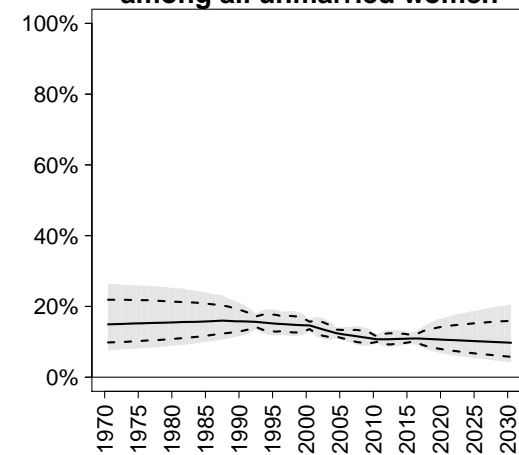

Total demand

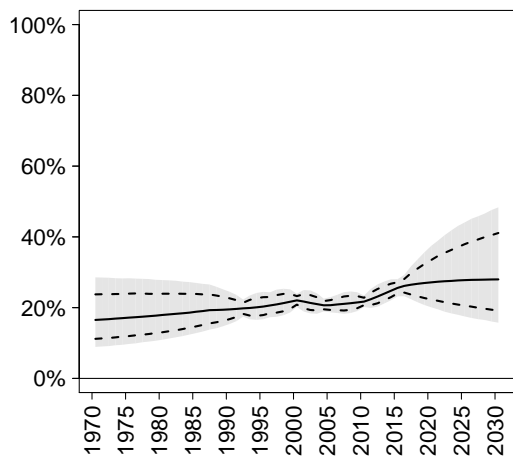

Demand satisfied (any method)

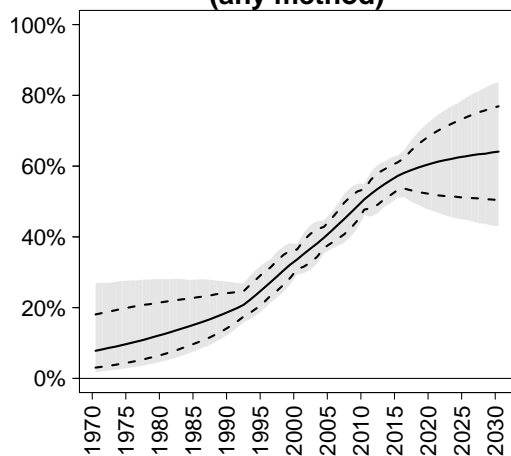

Demand satisfied (modern methods)

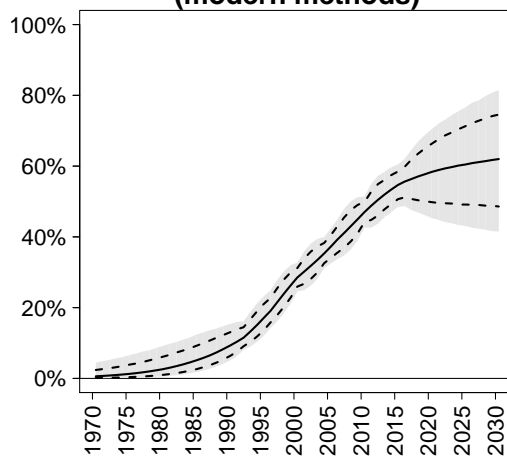



Mali --- All women

**CP (any)**

**CP (modern)**

**CP (traditional)**

**Unmet need among all unmarried women**

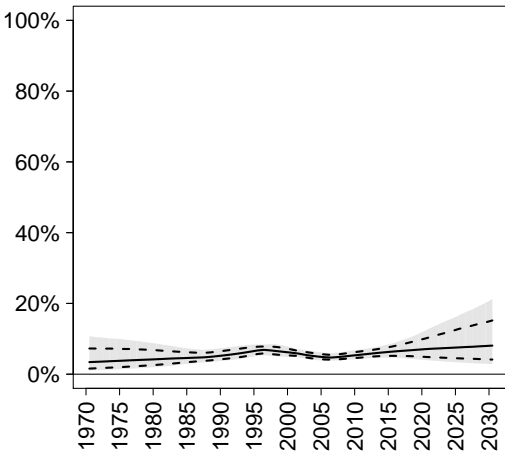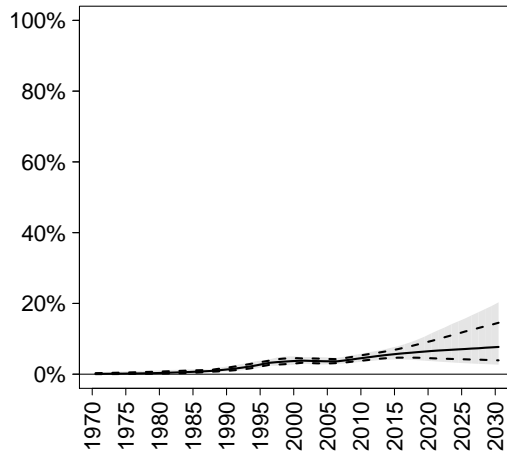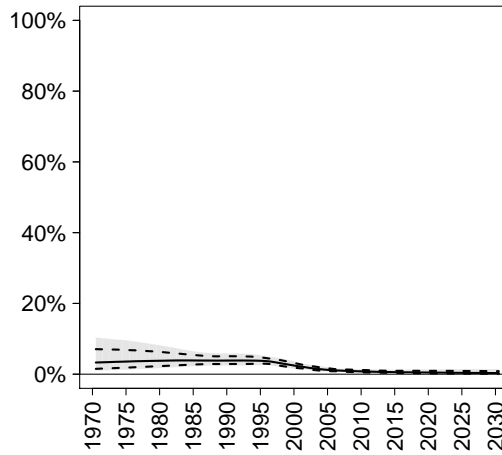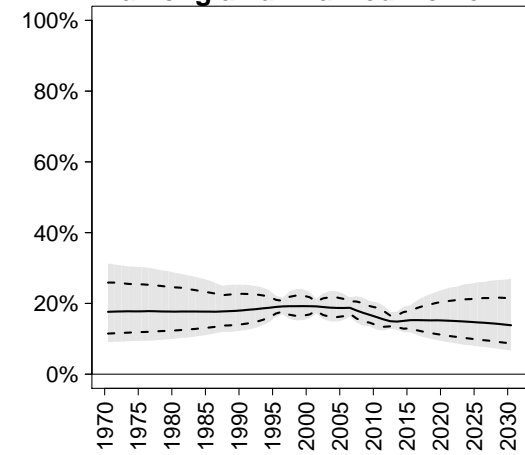

**Total demand**

**Demand satisfied (any method)**

**Demand satisfied (modern methods)**

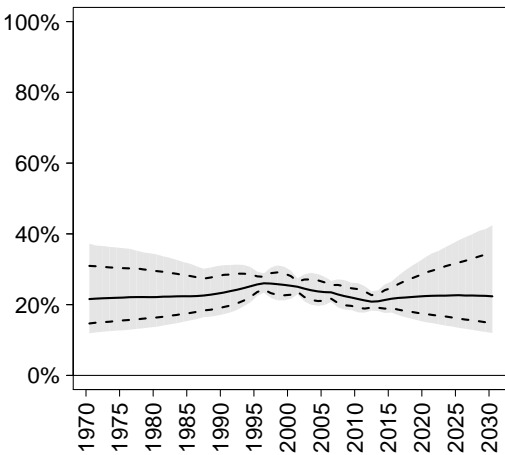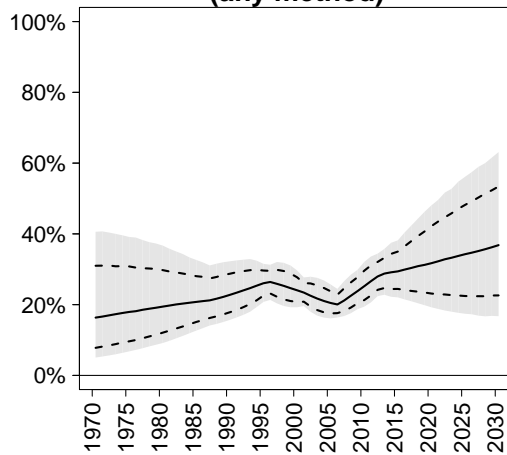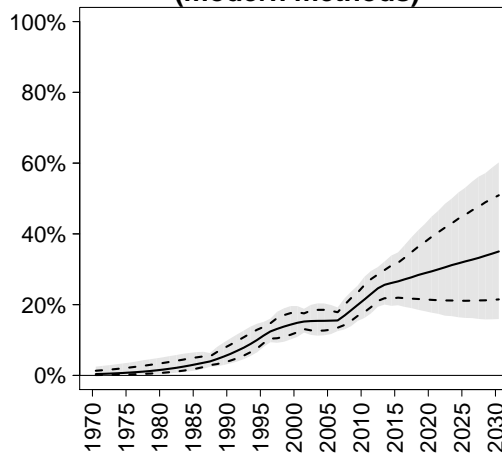

Mexico --- All women

**CP (any)**

**CP (modern)**

**CP (traditional)**

**Unmet need  
among all unmarried women**

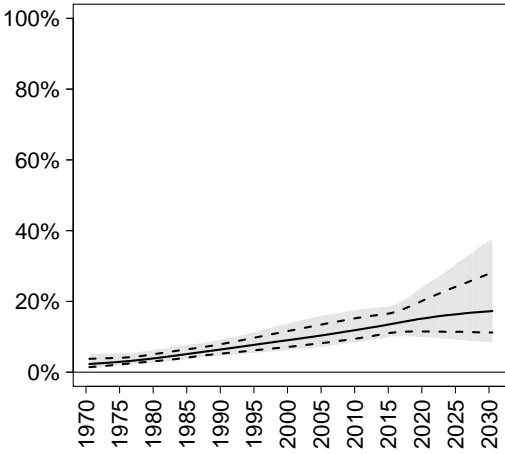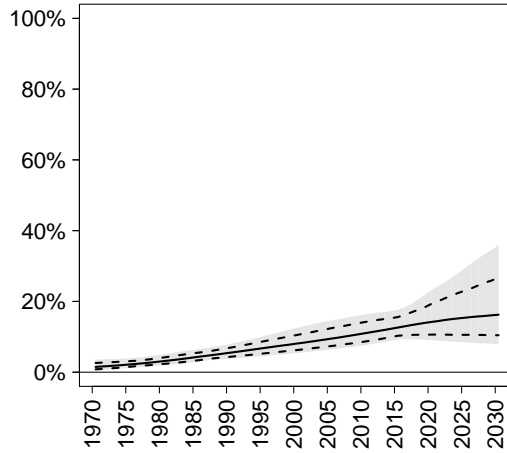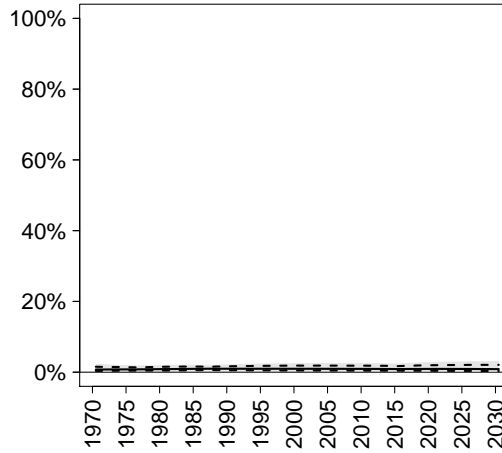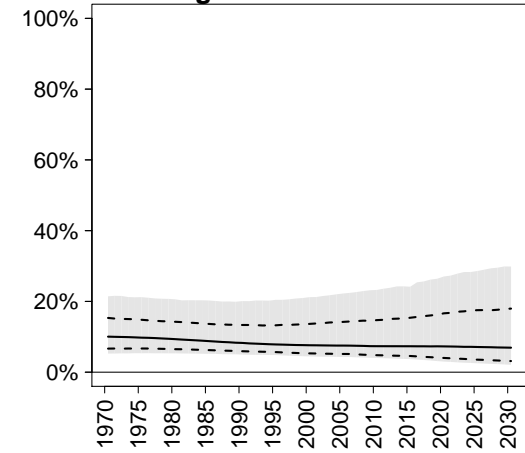

**Total demand**

**Demand satisfied  
(any method)**

**Demand satisfied  
(modern methods)**

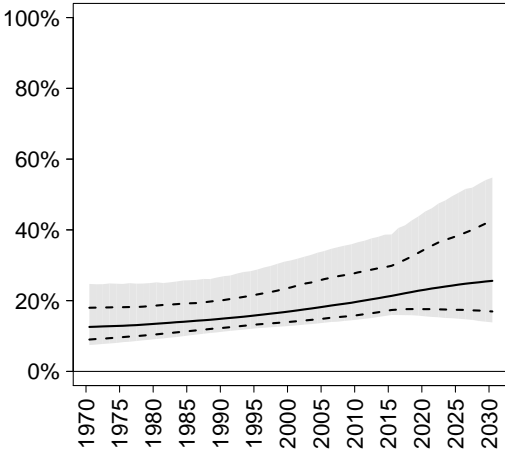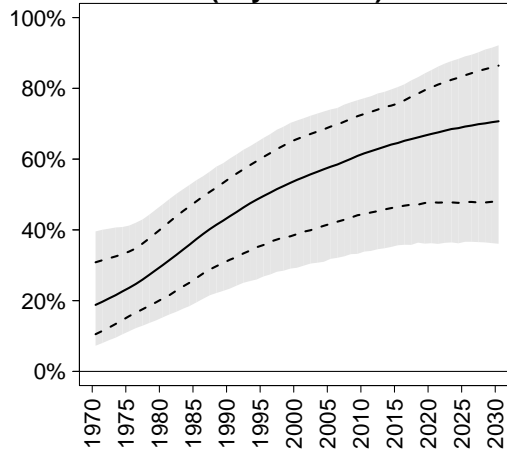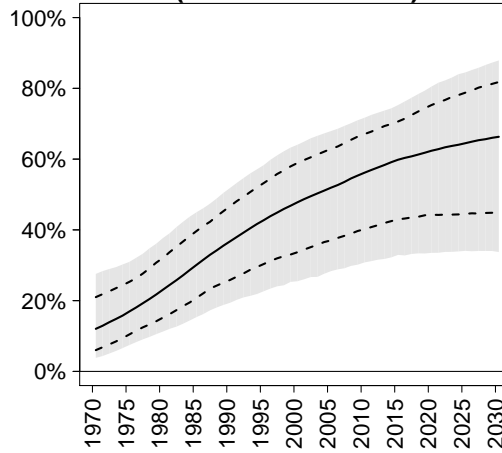

Mongolia --- All women

**CP (any)**

**CP (modern)**

**CP (traditional)**

**Unmet need among all unmarried women**

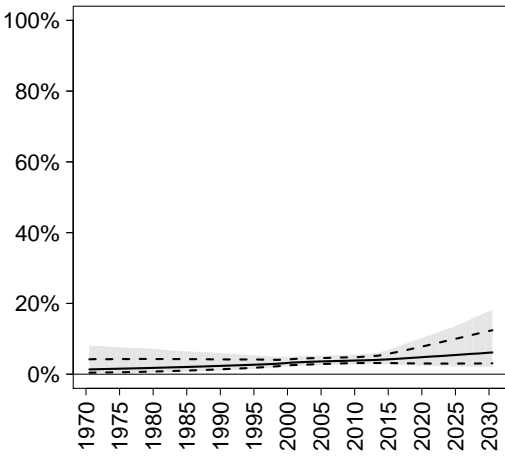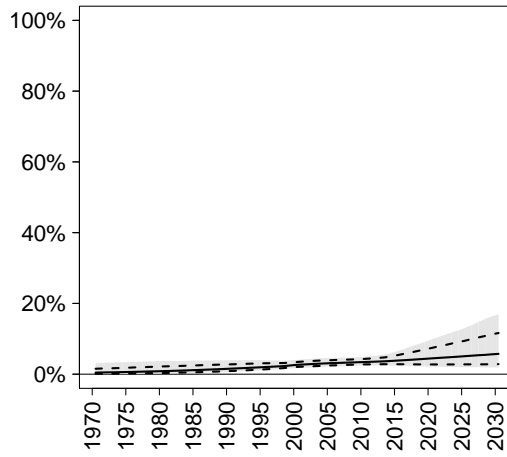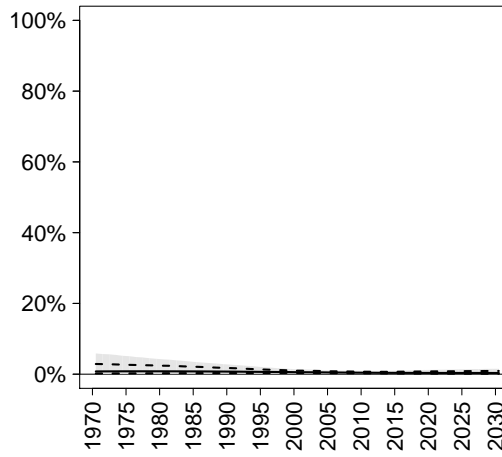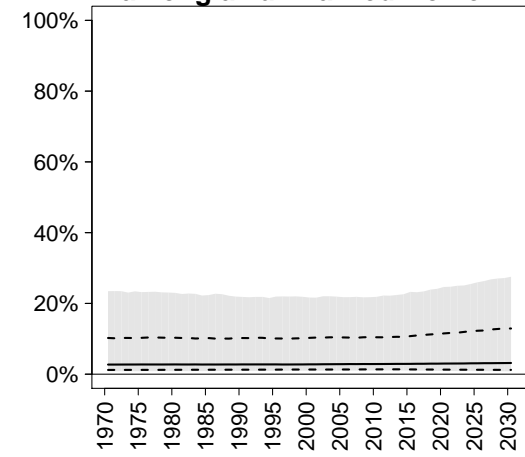

**Total demand**

**Demand satisfied (any method)**

**Demand satisfied (modern methods)**

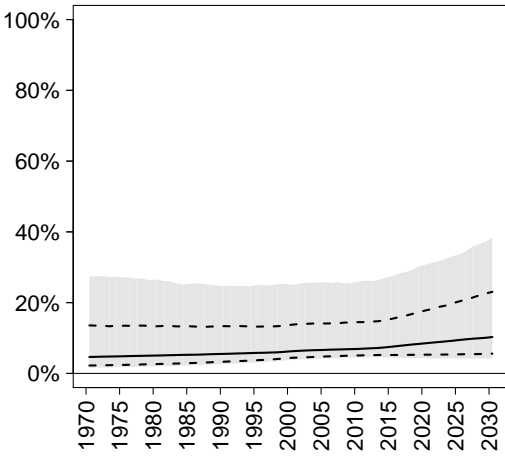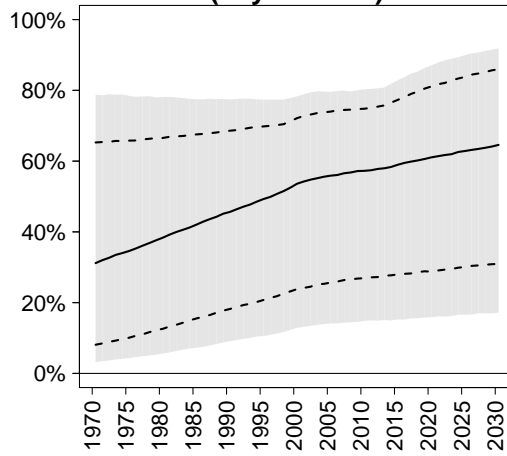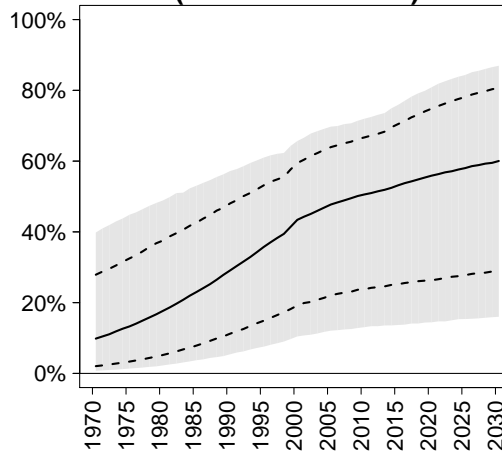

Mozambique --- All women

**CP (any)**

**CP (modern)**

**CP (traditional)**

**Unmet need among all unmarried women**

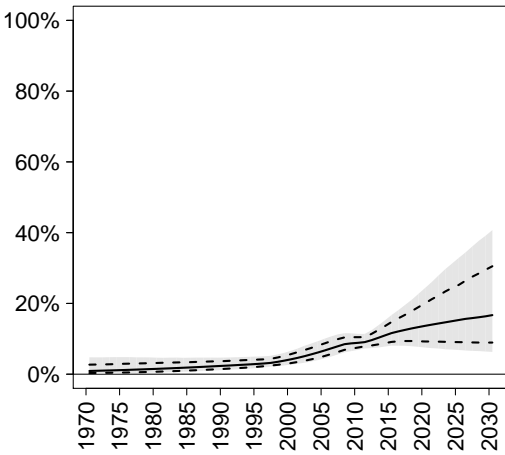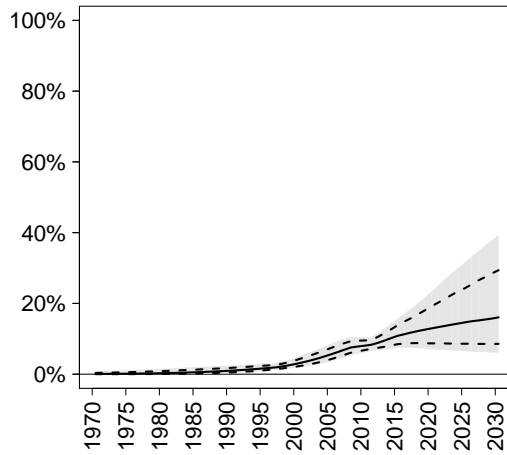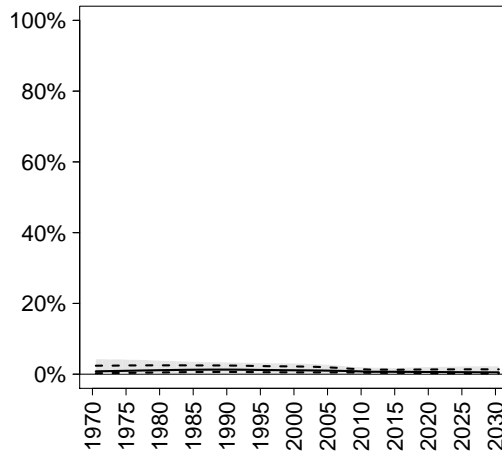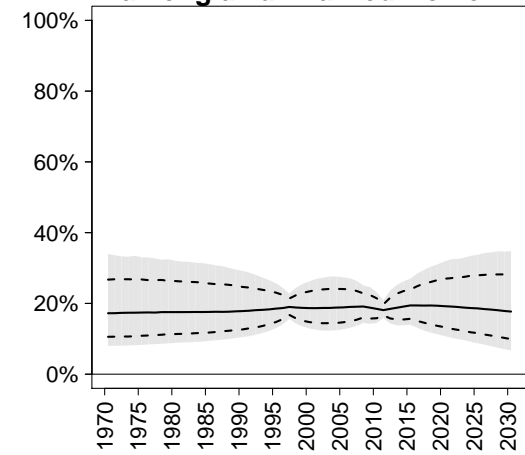

**Total demand**

**Demand satisfied (any method)**

**Demand satisfied (modern methods)**

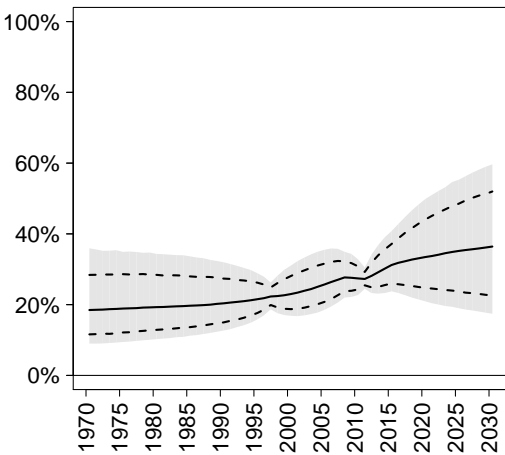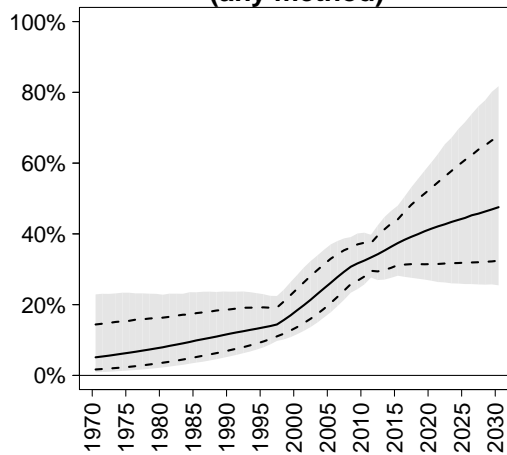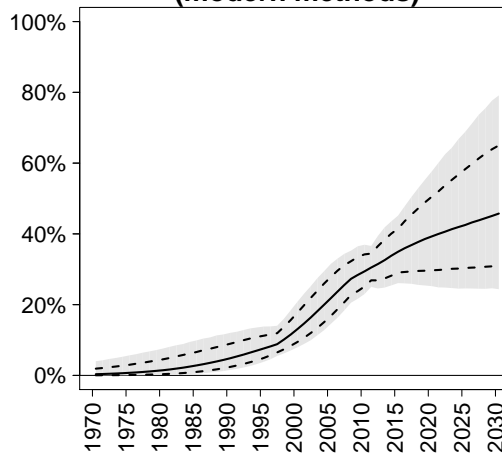

Namibia --- All women

**CP (any)**

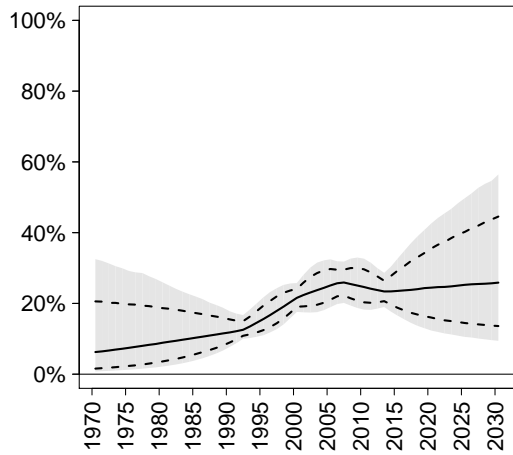

**CP (modern)**

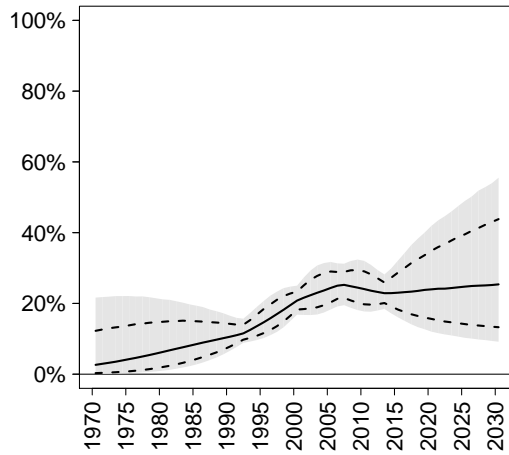

**CP (traditional)**

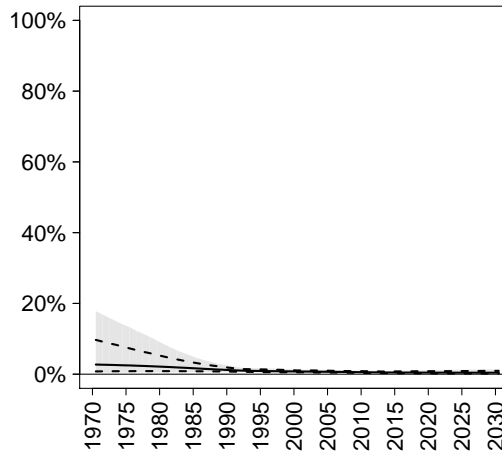

**Unmet need among all unmarried women**

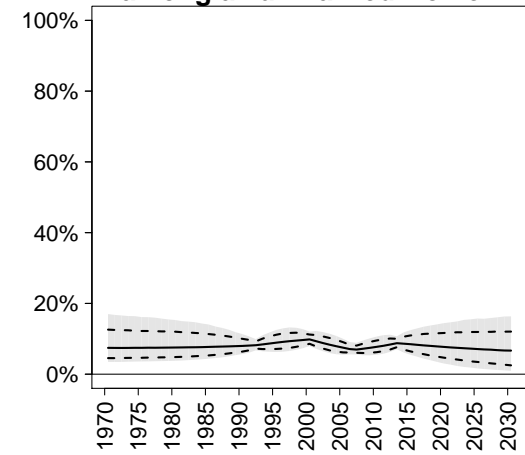

**Total demand**

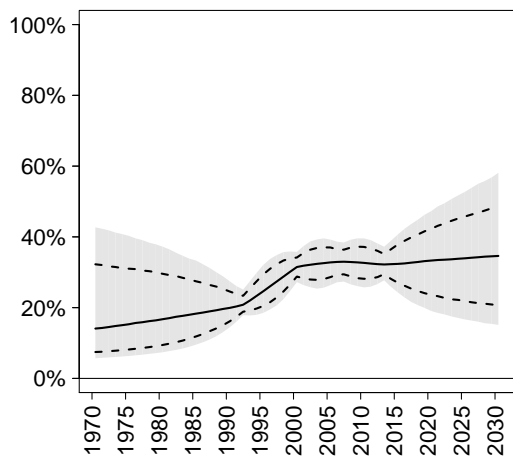

**Demand satisfied (any method)**

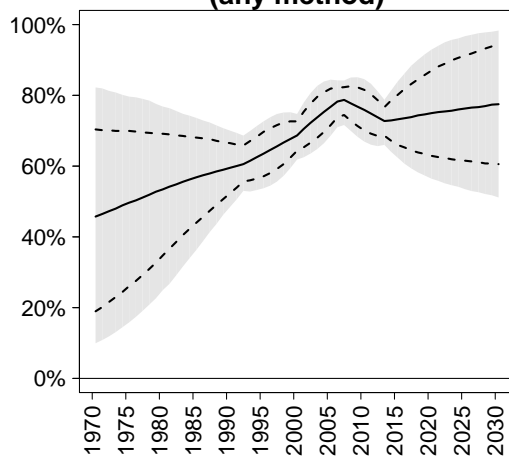

**Demand satisfied (modern methods)**

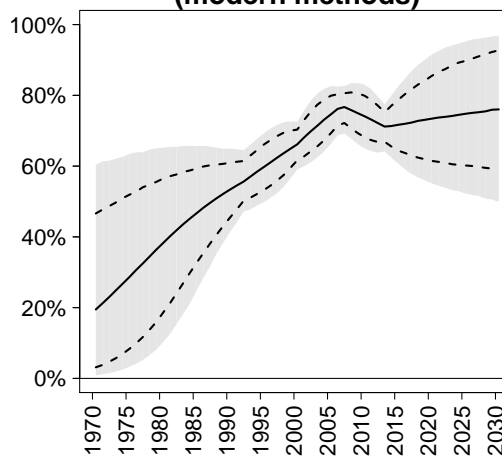

Nepal --- All women

CP (any)

CP (modern)

CP (traditional)

Unmet need among all unmarried women

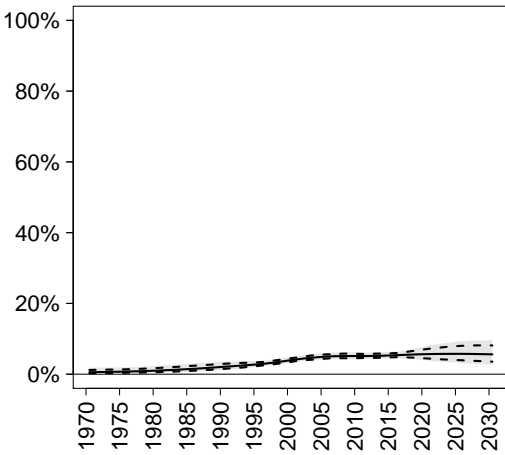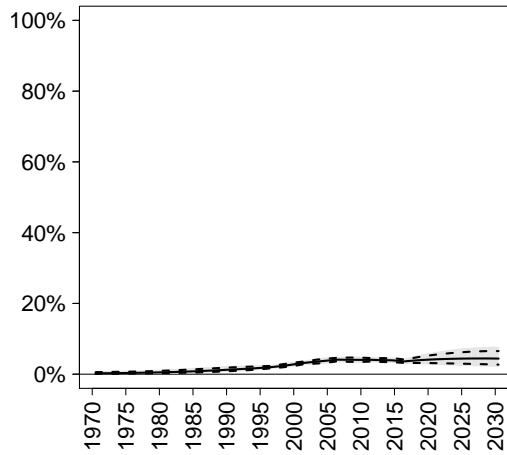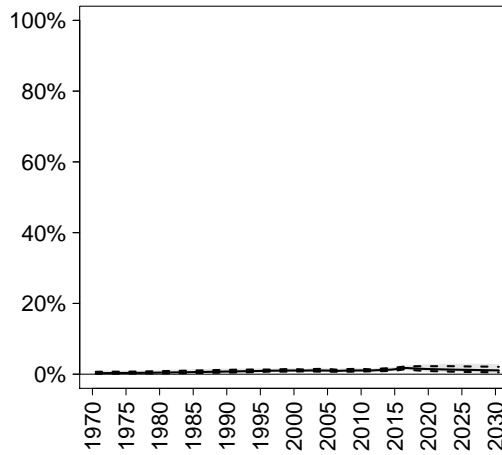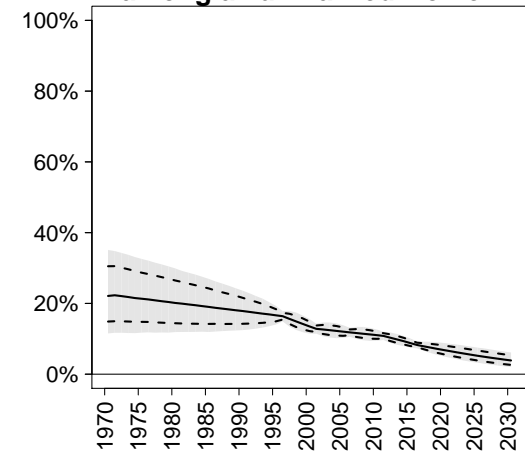

Total demand

Demand satisfied (any method)

Demand satisfied (modern methods)

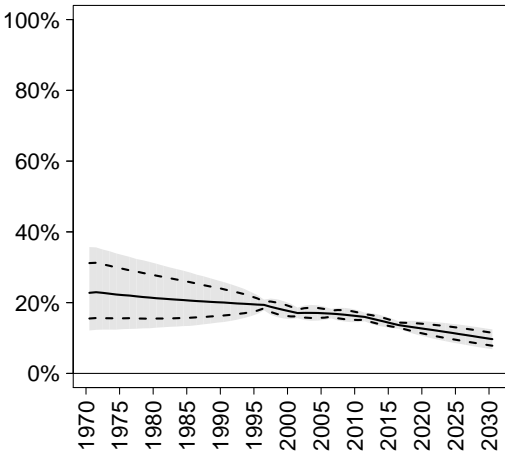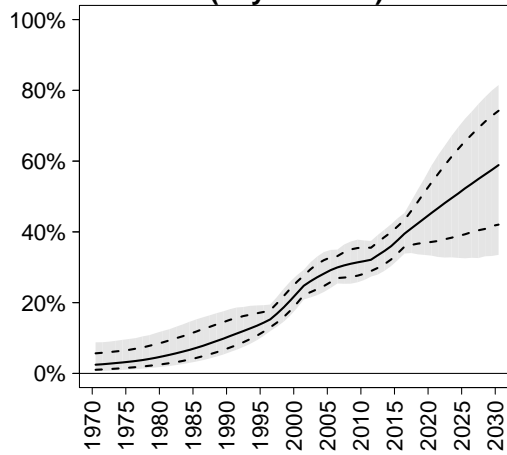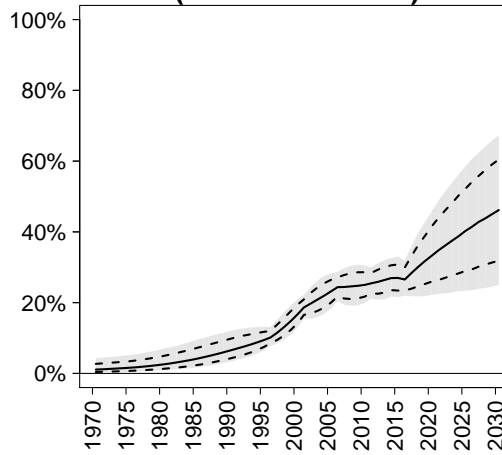

Nicaragua --- All women

CP (any)

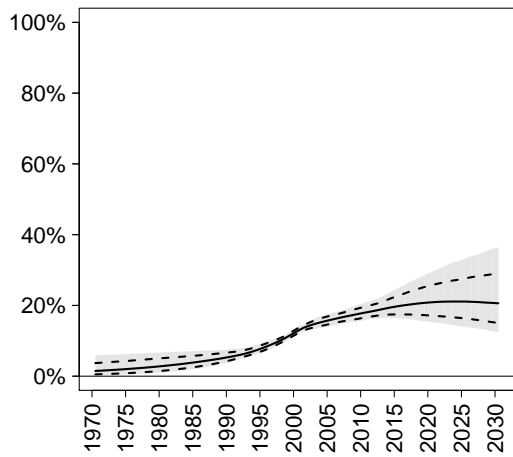

CP (modern)

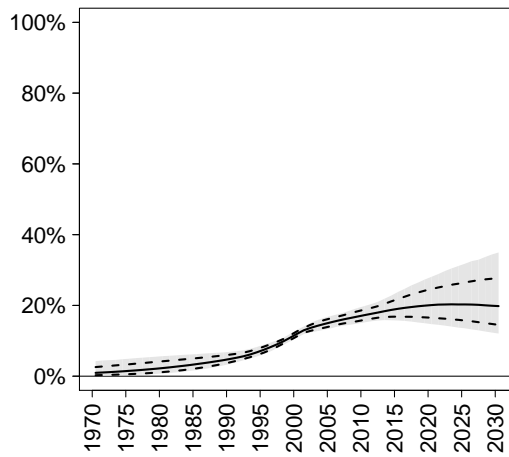

CP (traditional)

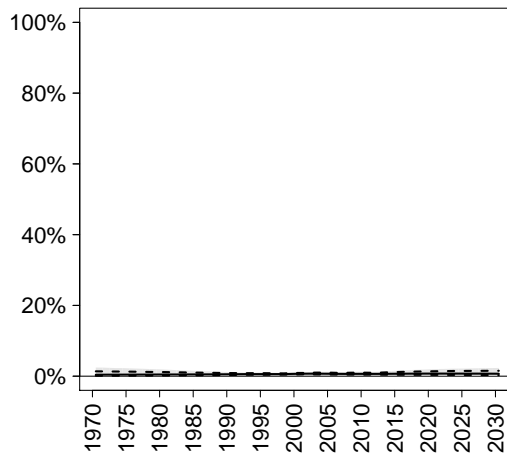

Unmet need among all unmarried women

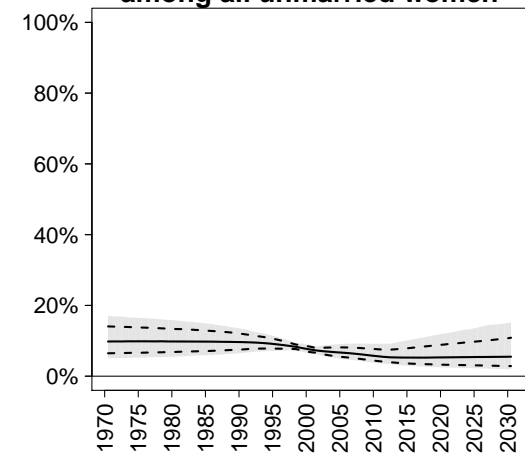

Total demand

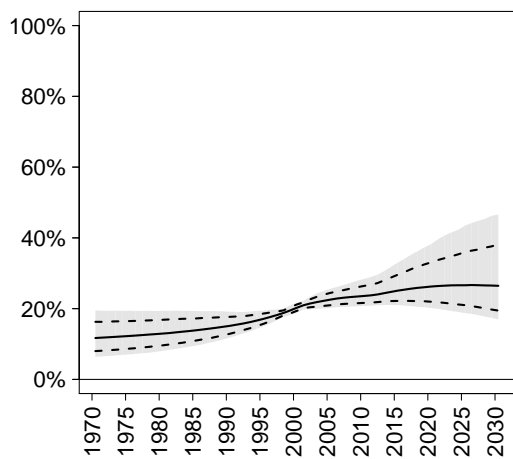

Demand satisfied (any method)

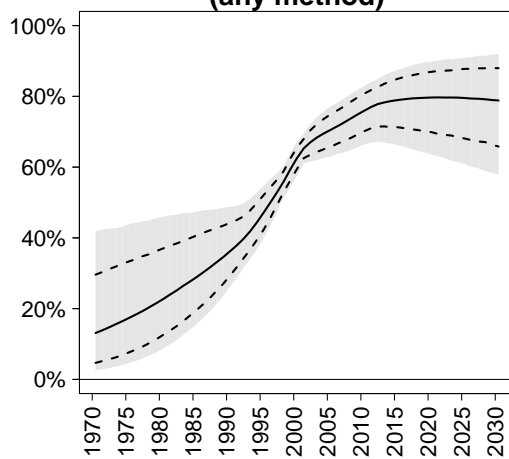

Demand satisfied (modern methods)

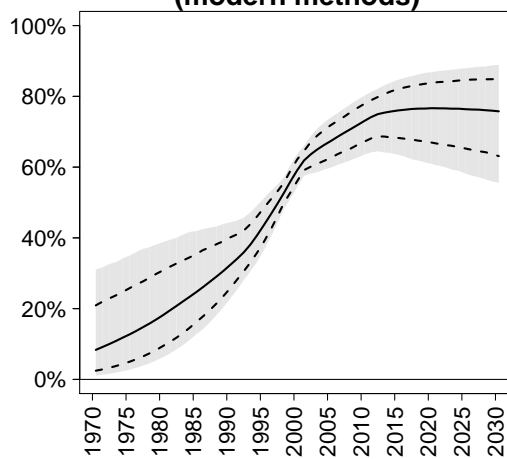

Niger --- All women

**CP (any)**

**CP (modern)**

**CP (traditional)**

**Unmet need  
among all unmarried women**

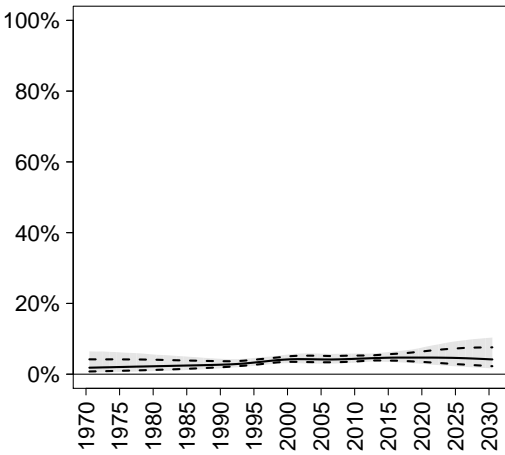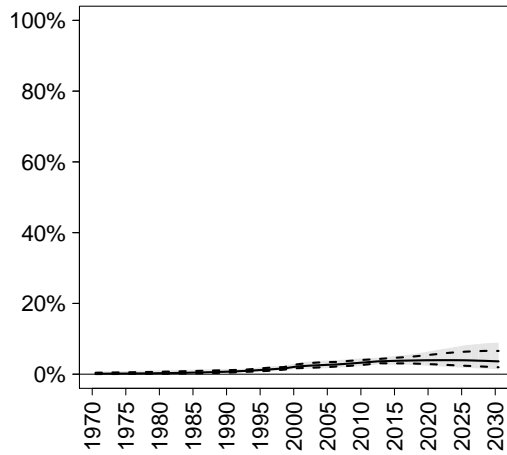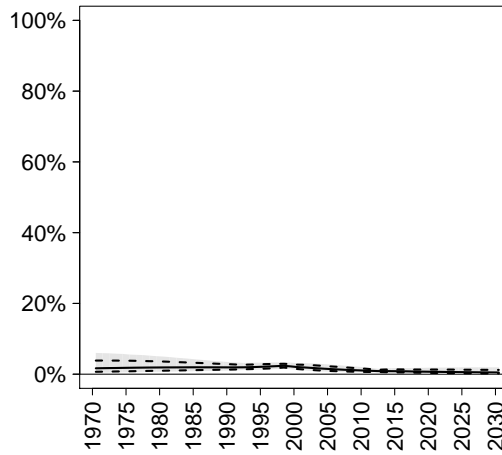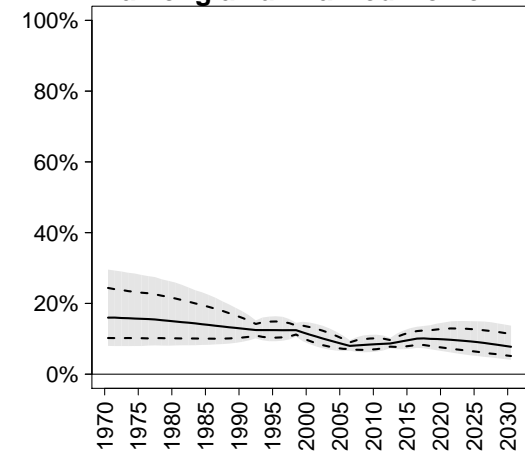

**Total demand**

**Demand satisfied  
(any method)**

**Demand satisfied  
(modern methods)**

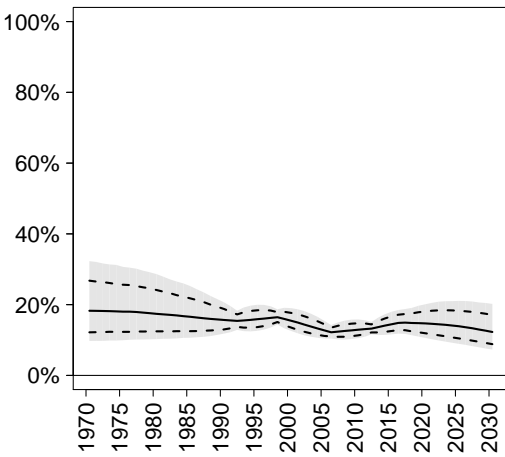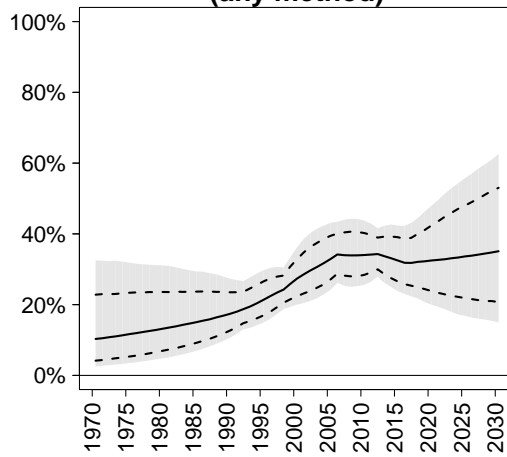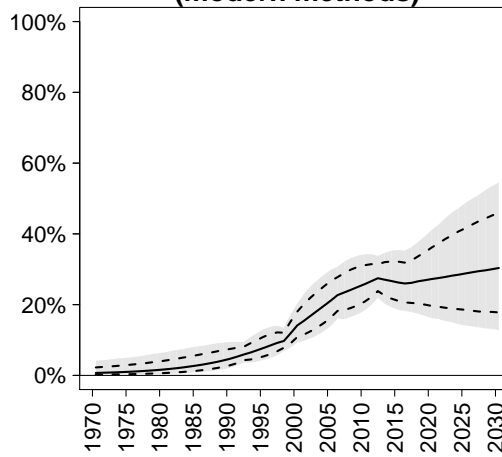



Nigeria --- All women

**CP (any)**

**CP (modern)**

**CP (traditional)**

**Unmet need among all unmarried women**

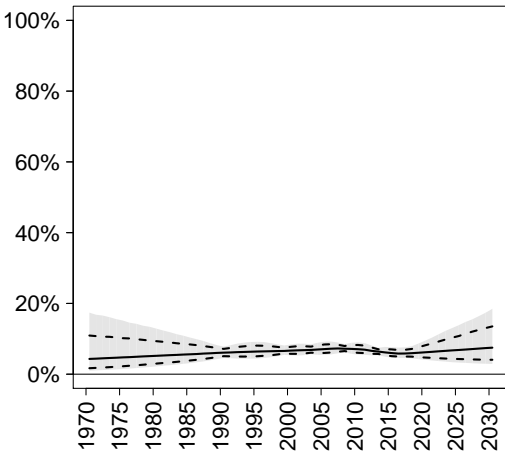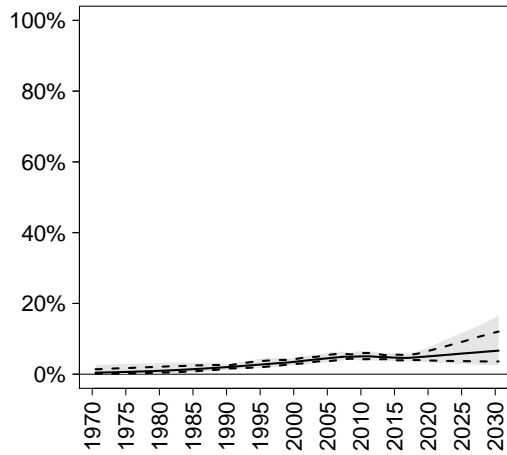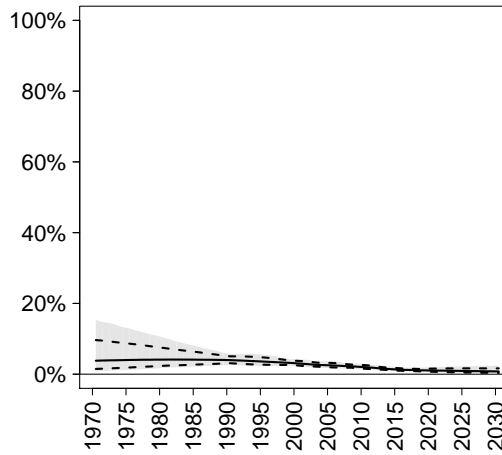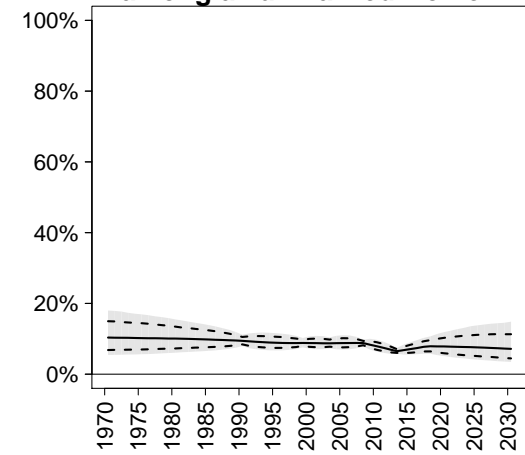

**Total demand**

**Demand satisfied (any method)**

**Demand satisfied (modern methods)**

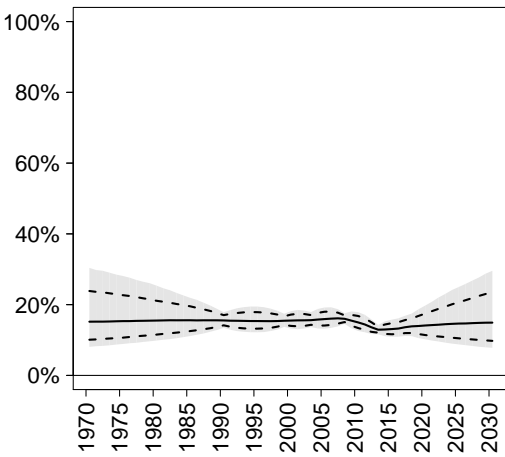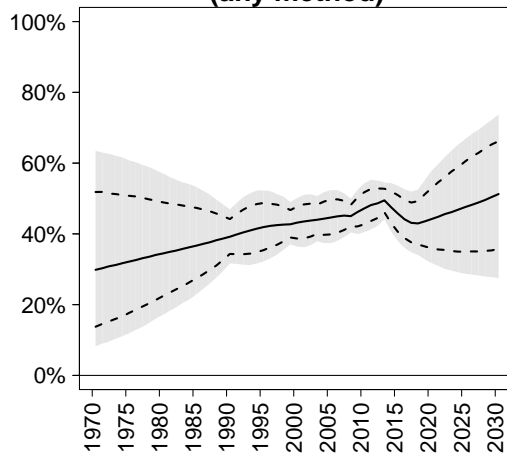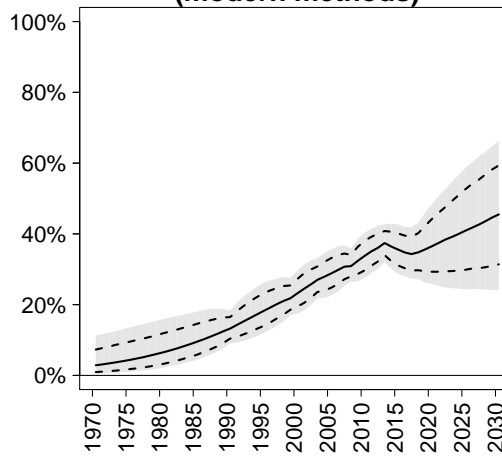

Papua New Guinea --- All women

**CP (any)**

**CP (modern)**

**CP (traditional)**

**Unmet need  
among all unmarried women**

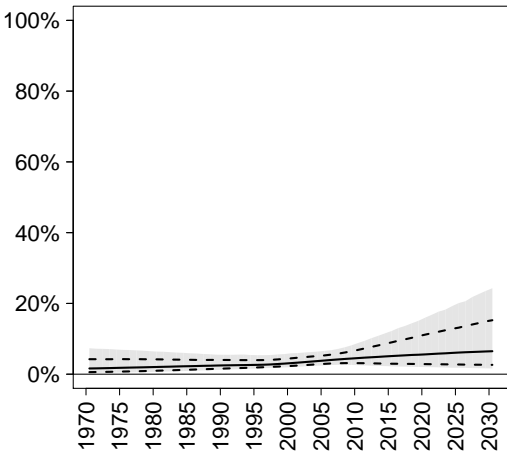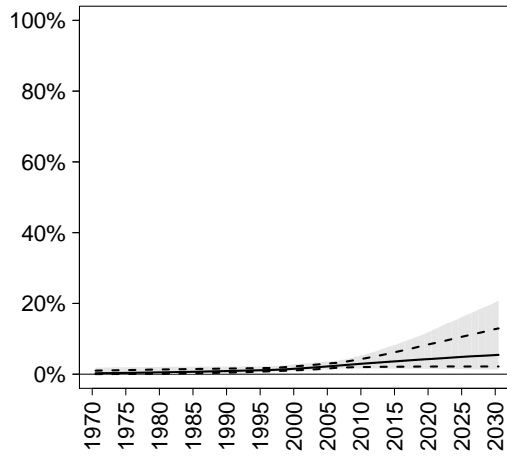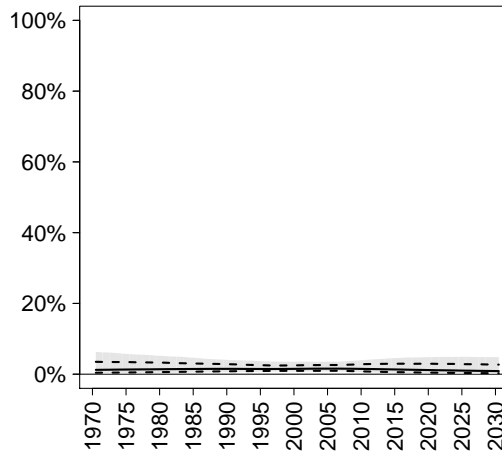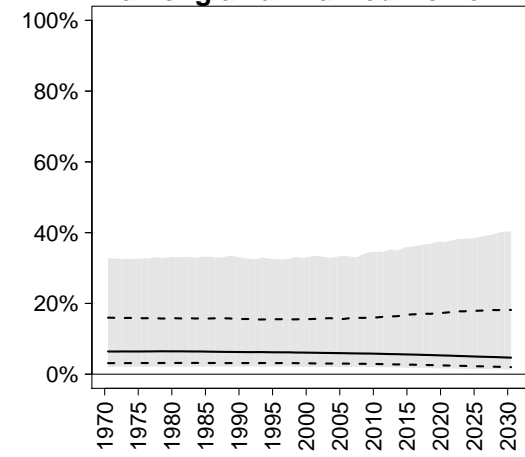

**Total demand**

**Demand satisfied  
(any method)**

**Demand satisfied  
(modern methods)**

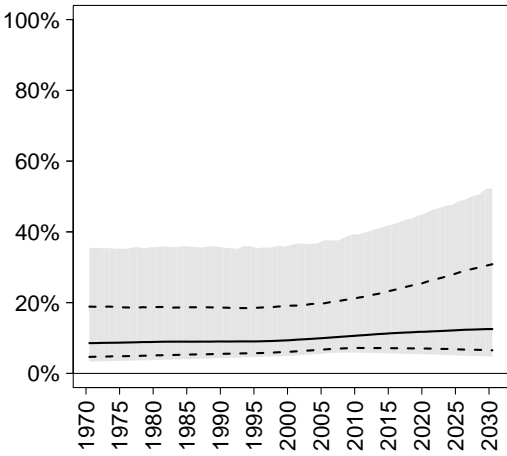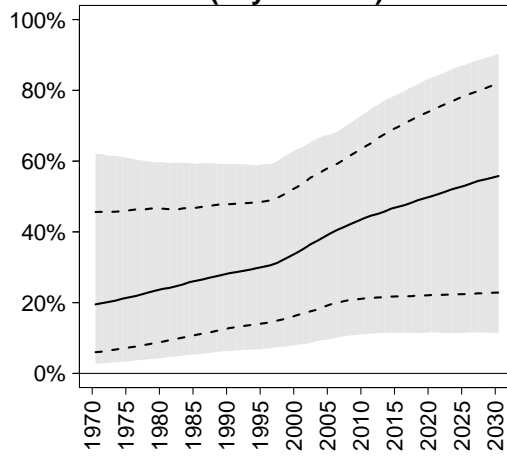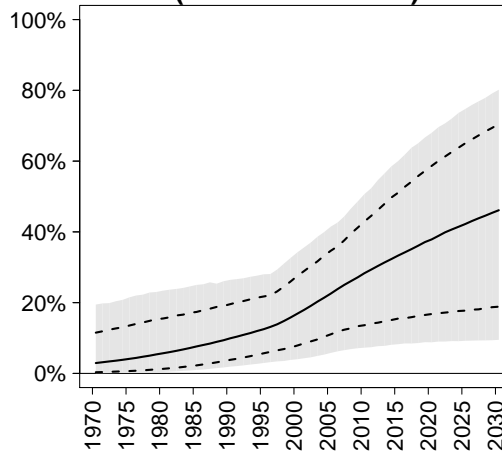

Paraguay --- All women

CP (any)

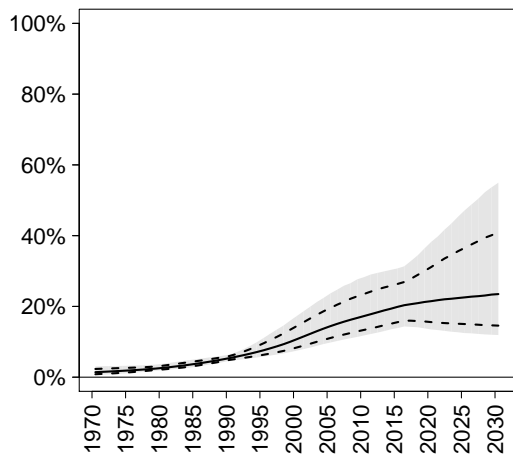

CP (modern)

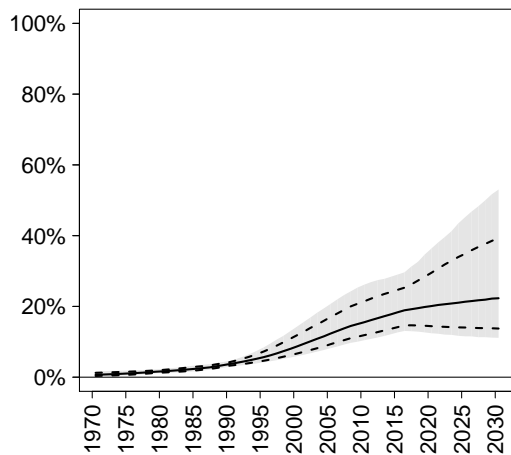

CP (traditional)

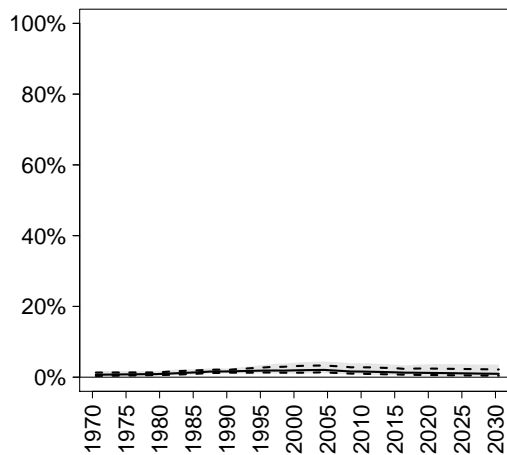

Unmet need among all unmarried women

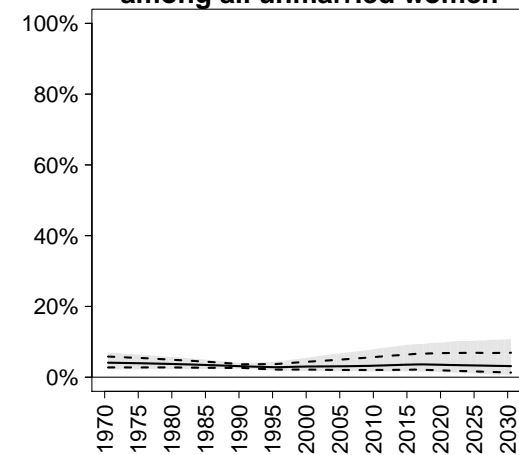

Total demand

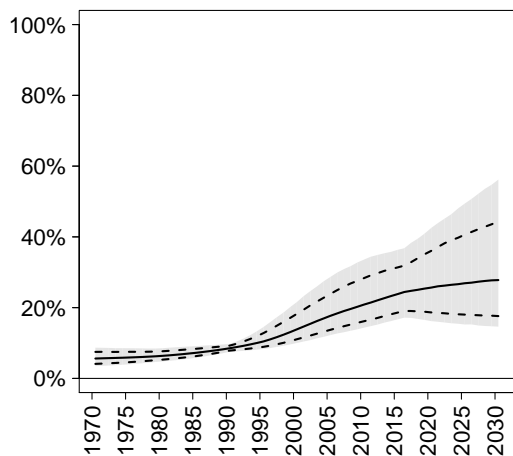

Demand satisfied (any method)

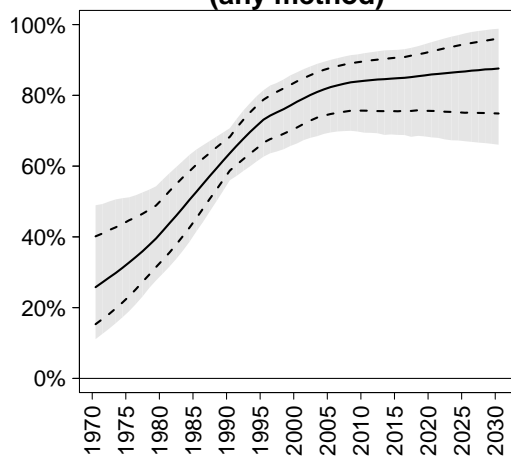

Demand satisfied (modern methods)

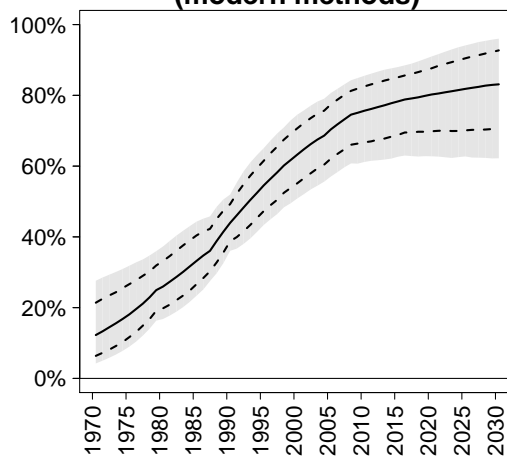

Peru --- All women

CP (any)

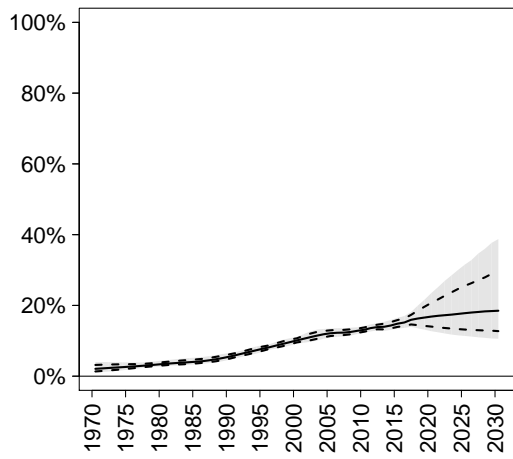

CP (modern)

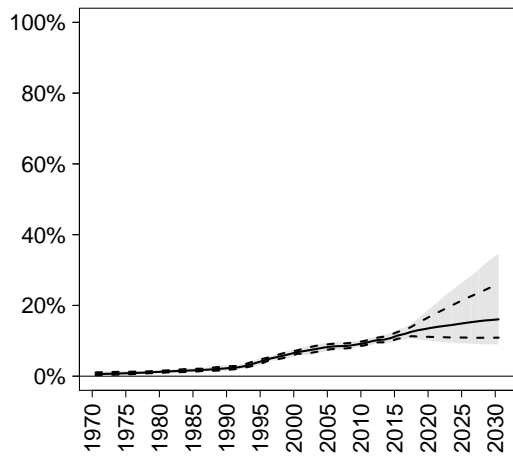

CP (traditional)

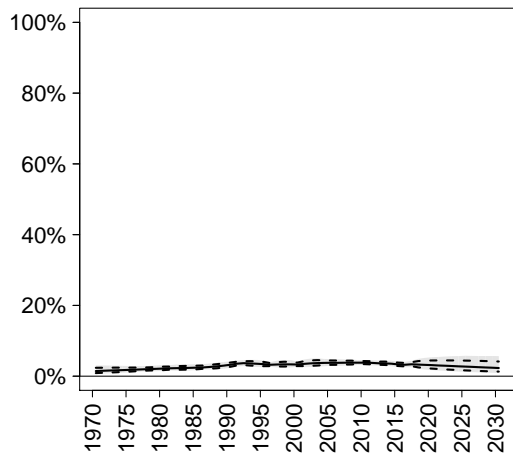

Unmet need among all unmarried women

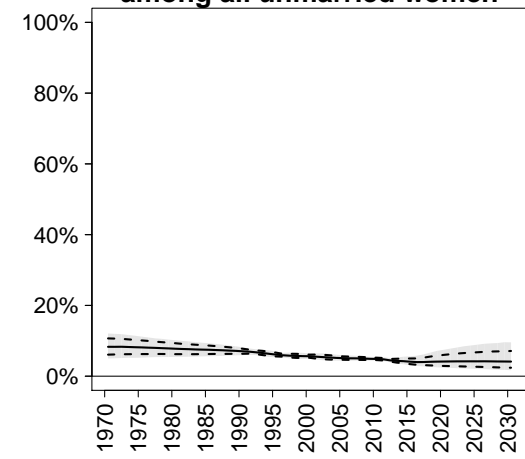

Total demand

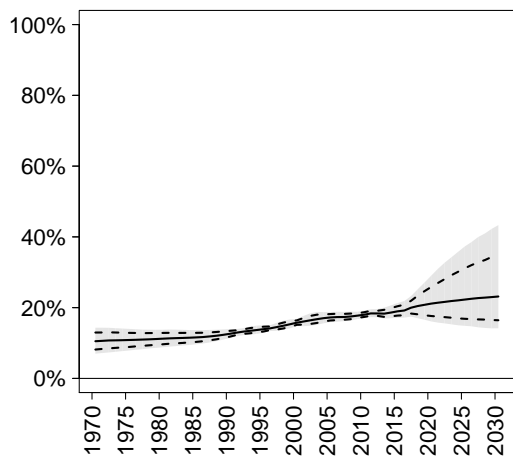

Philippines --- All women

**CP (any)**

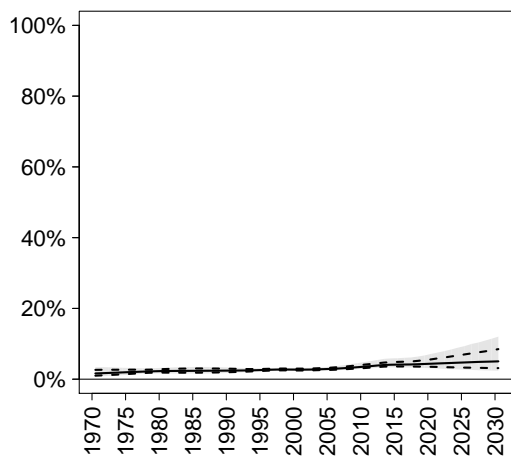

**CP (modern)**

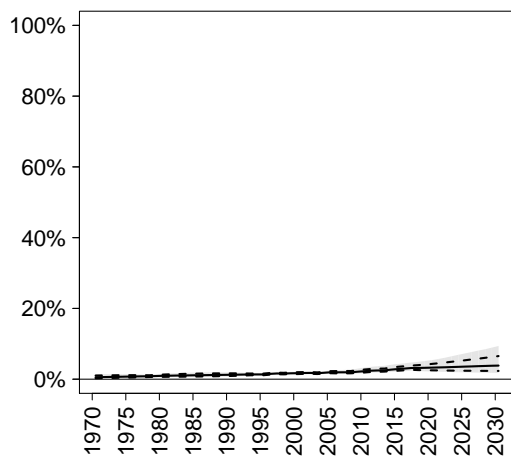

**CP (traditional)**

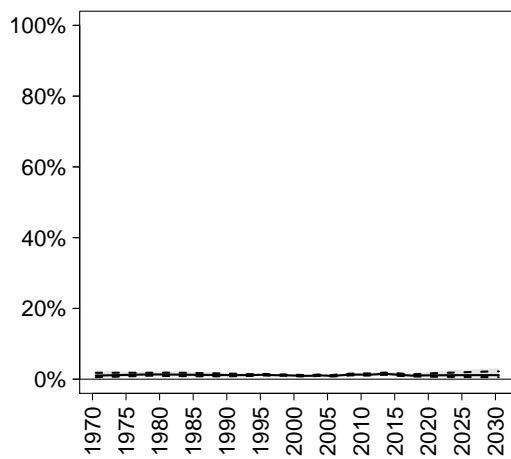

**Unmet need among all unmarried women**

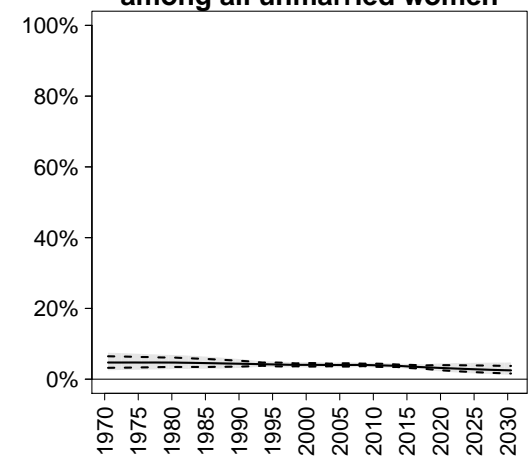

**Total demand**

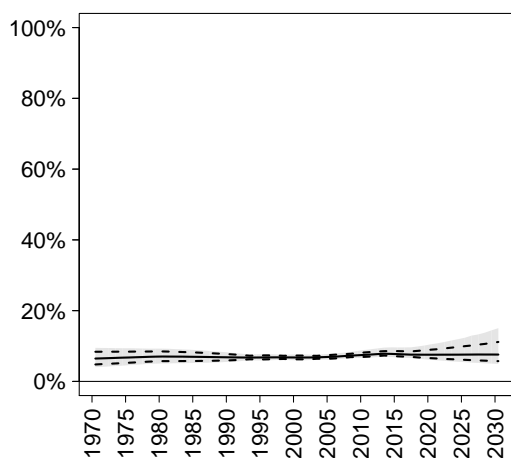

**Demand satisfied (any method)**

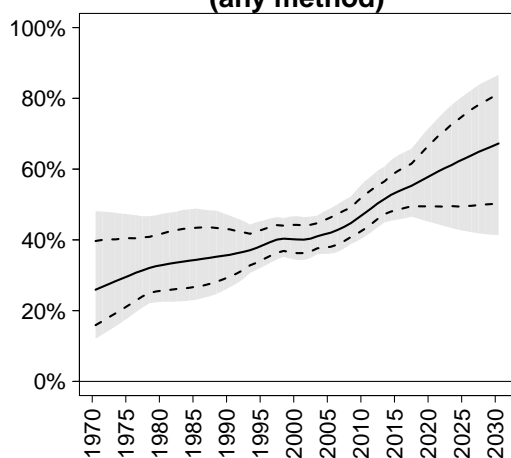

**Demand satisfied (modern methods)**

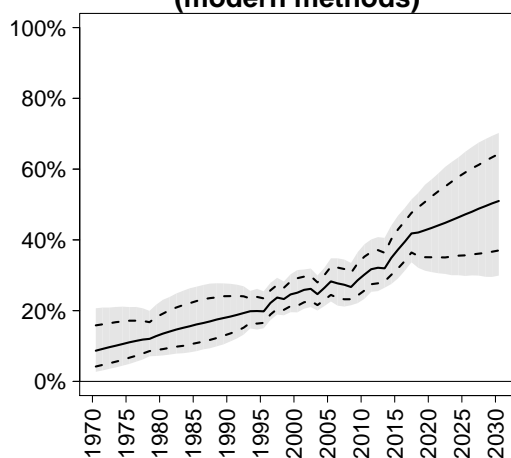

Republic of Moldova --- All women

**CP (any)**

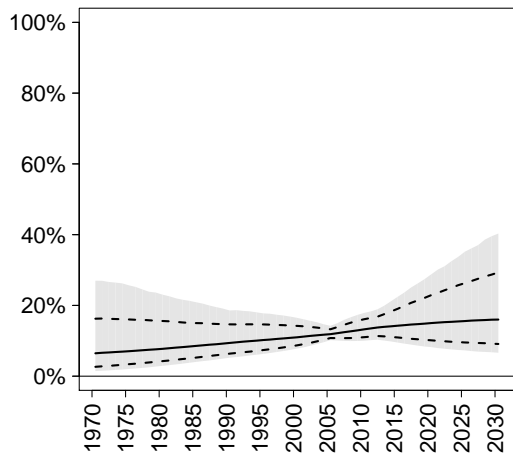

**CP (modern)**

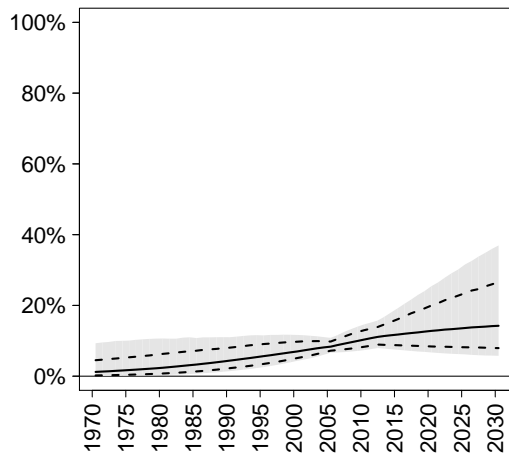

**CP (traditional)**

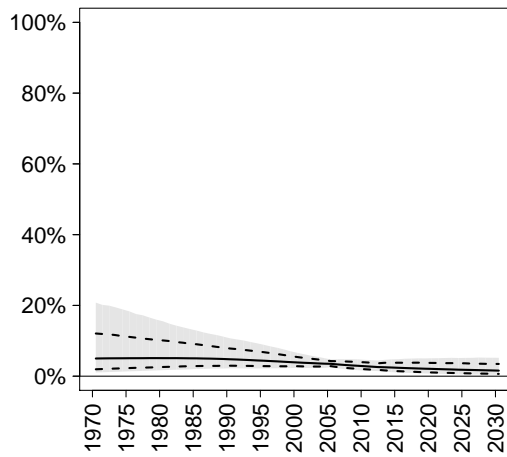

**Unmet need among all unmarried women**

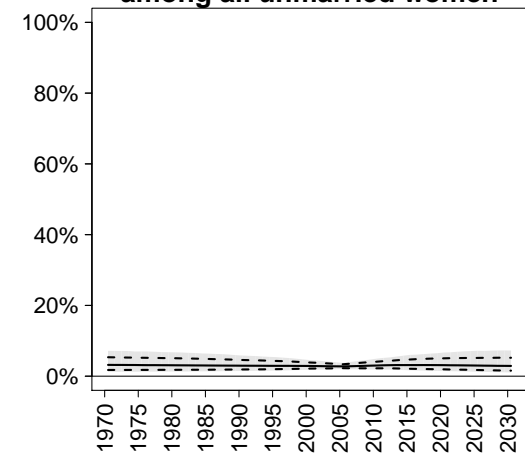

**Total demand**

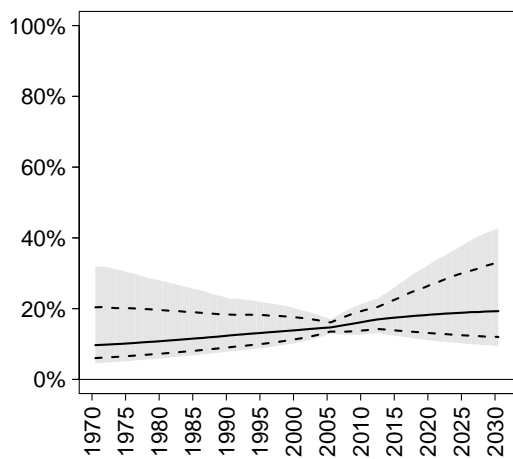

**Demand satisfied (any method)**

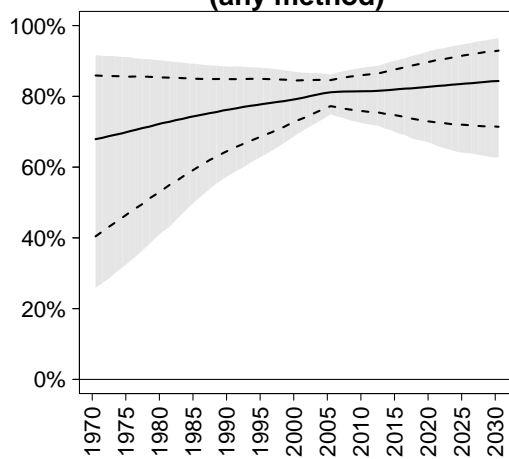

**Demand satisfied (modern methods)**

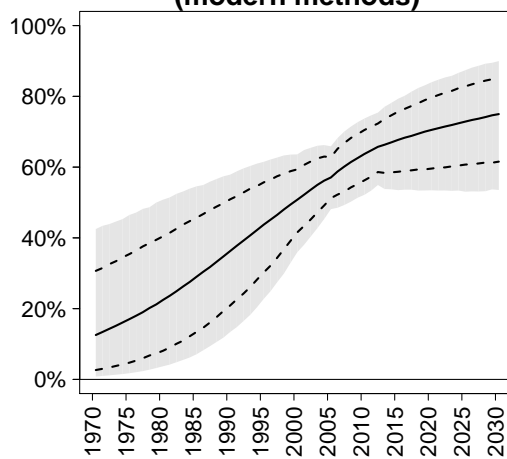

Rwanda --- All women

**CP (any)**

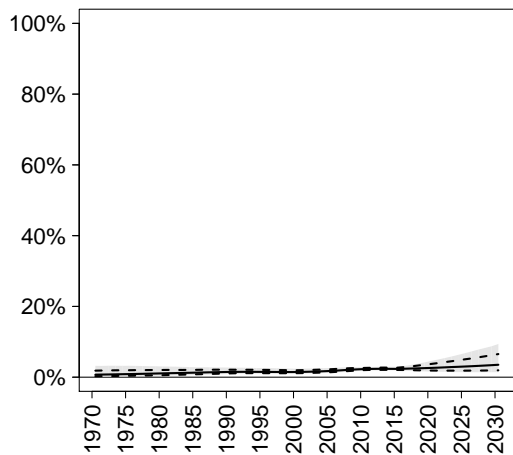

**CP (modern)**

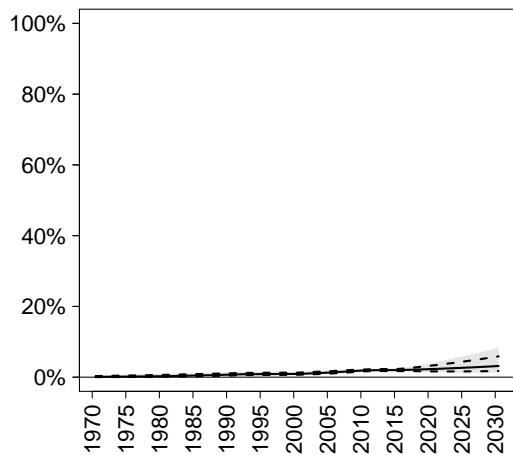

**CP (traditional)**

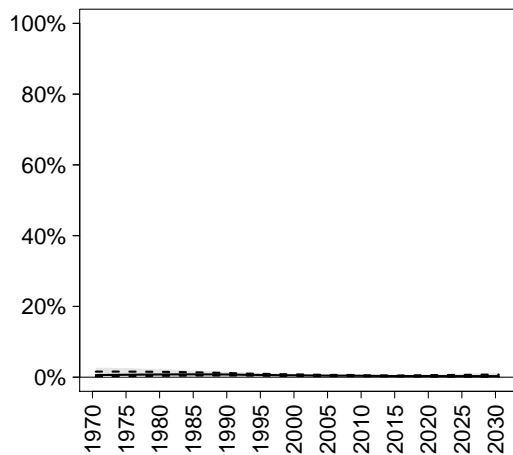

**Unmet need among all unmarried women**

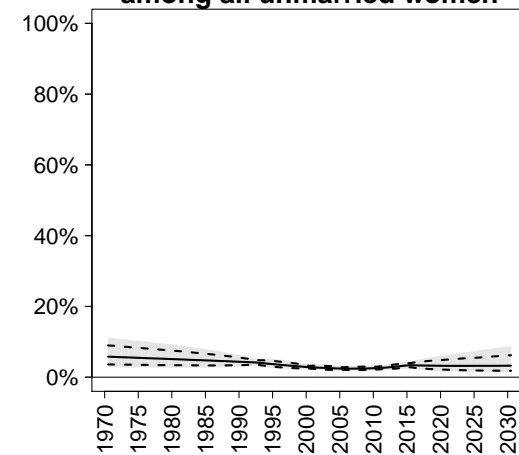

**Total demand**

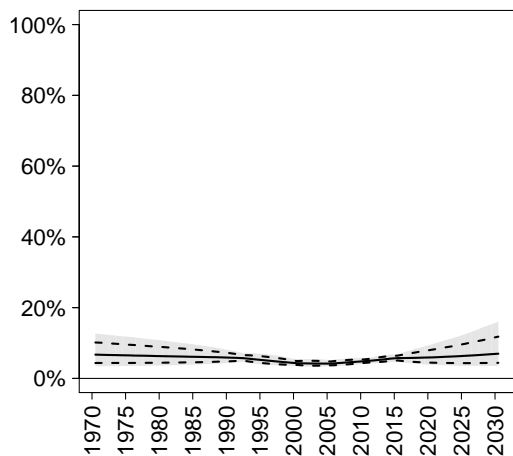

**Demand satisfied (any method)**

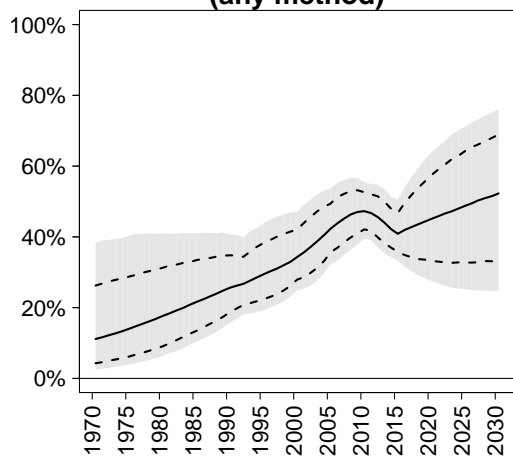

**Demand satisfied (modern methods)**

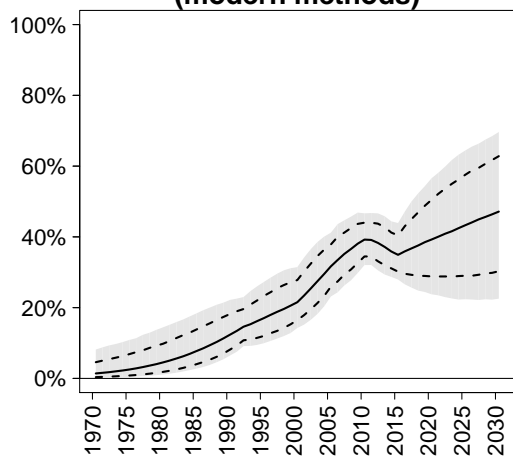

Samoa --- All women

**CP (any)**

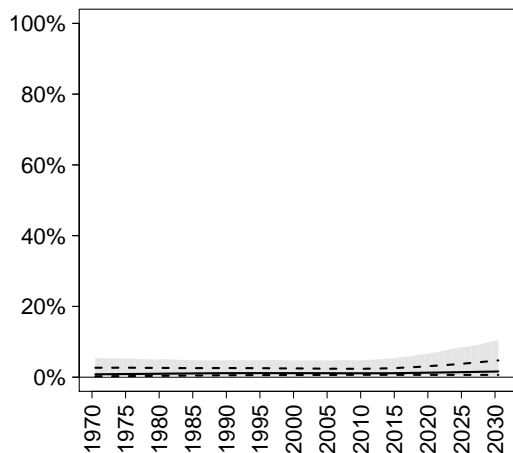

**CP (modern)**

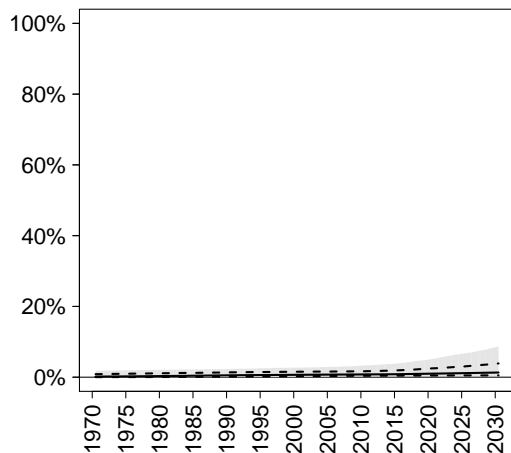

**CP (traditional)**

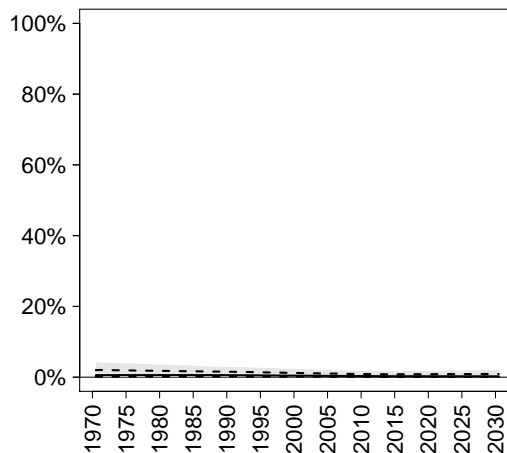

**Unmet need among all unmarried women**

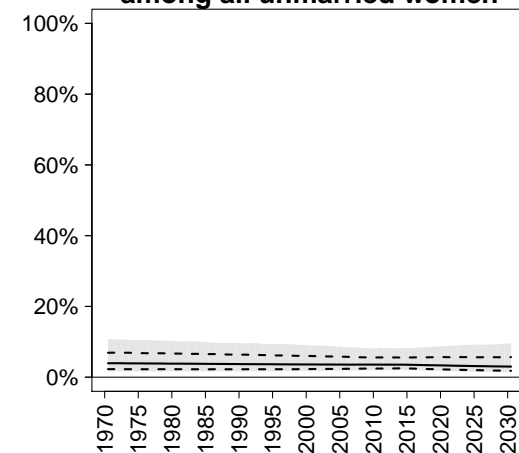

**Total demand**

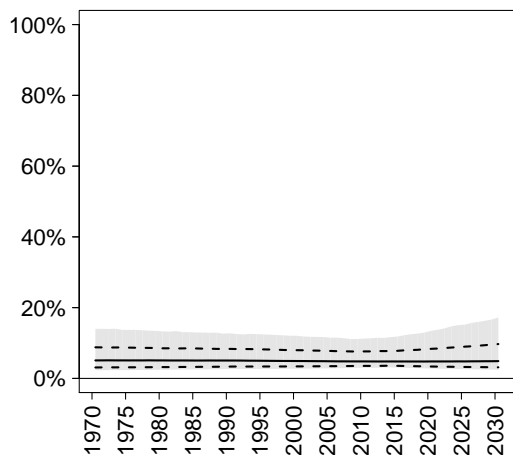

**Demand satisfied (any method)**

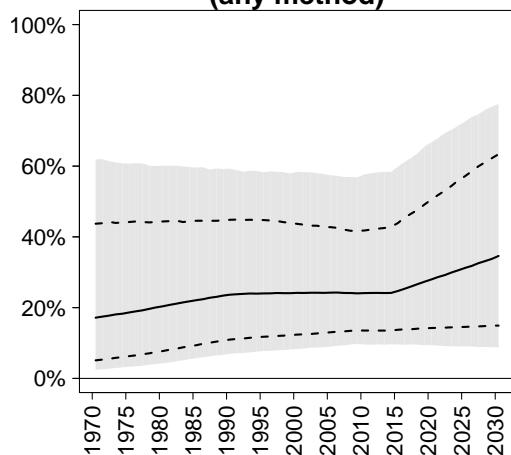

**Demand satisfied (modern methods)**

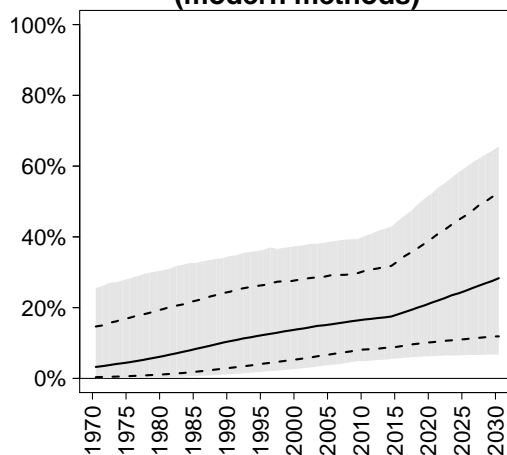



Sao Tome and Principe --- All women

**CP (any)**

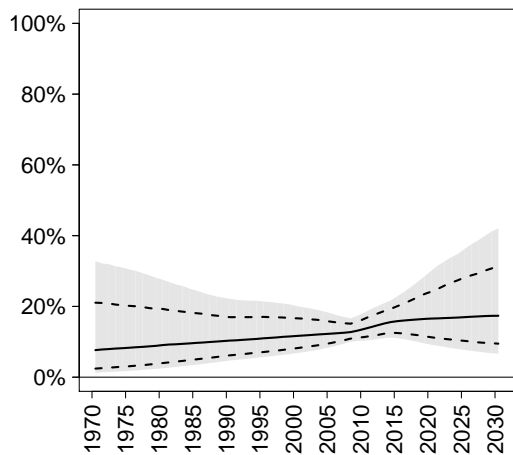

**CP (modern)**

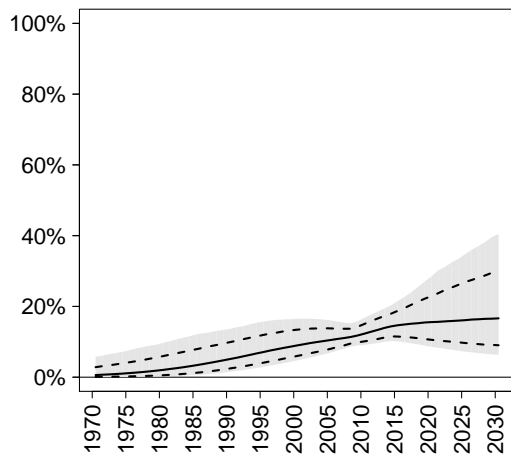

**CP (traditional)**

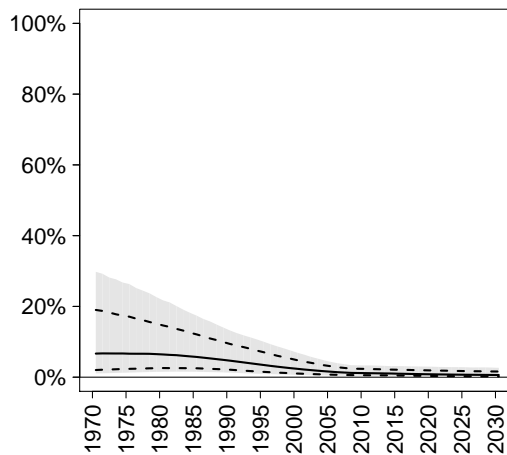

**Unmet need among all unmarried women**

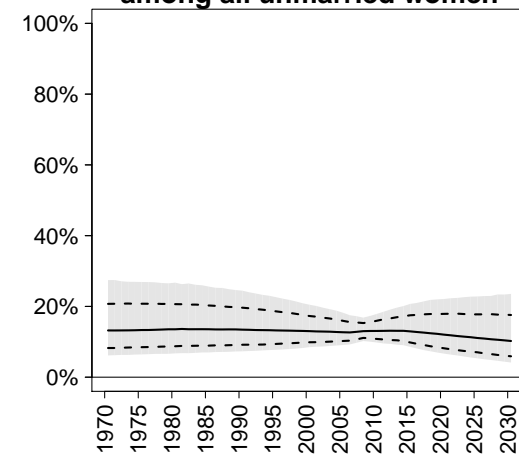

**Total demand**

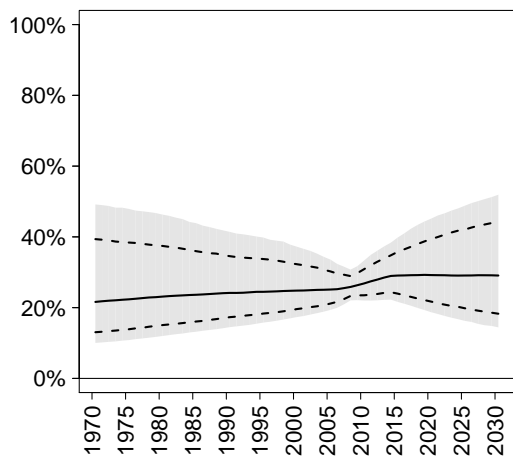

**Demand satisfied (any method)**

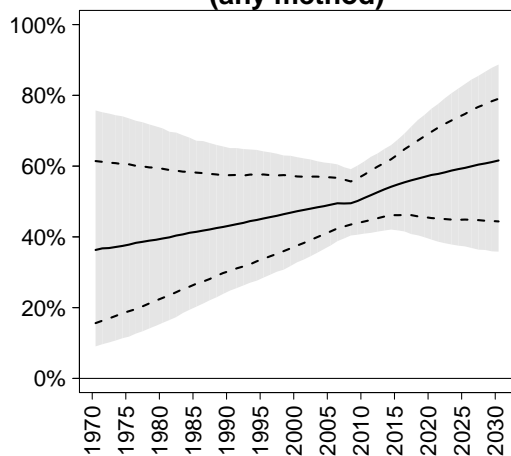

**Demand satisfied (modern methods)**

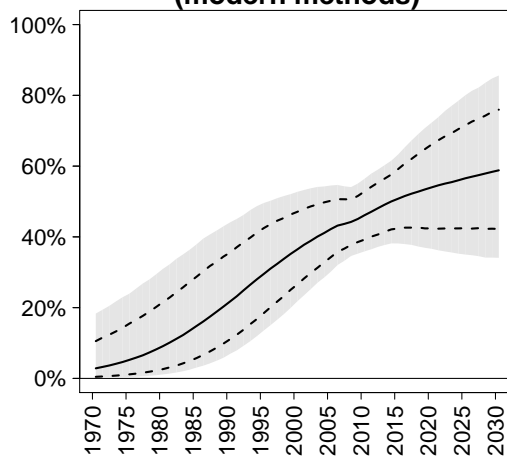

Senegal --- All women

**CP (any)**

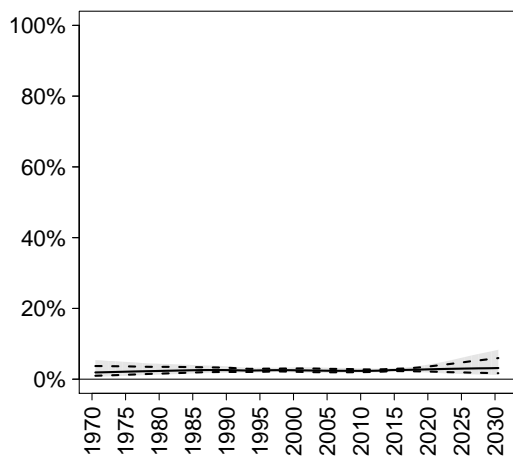

**CP (modern)**

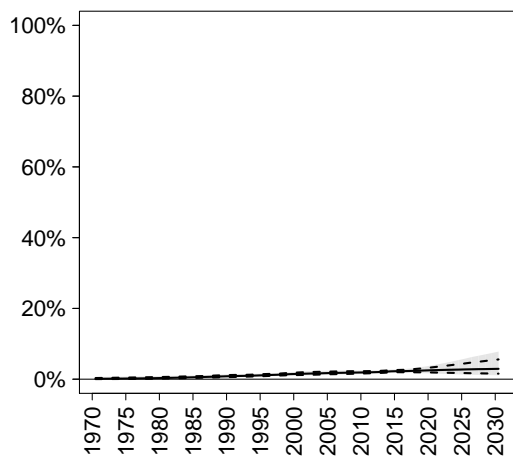

**CP (traditional)**

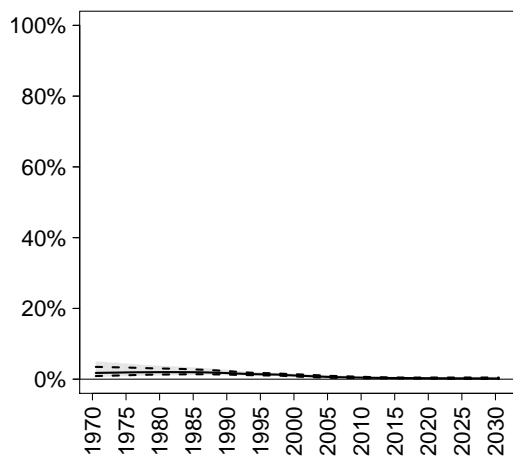

**Unmet need among all unmarried women**

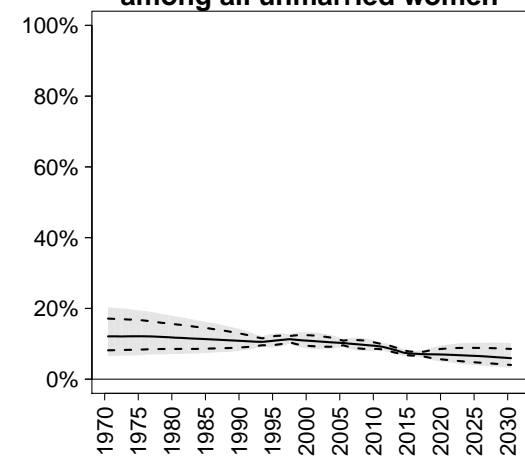

**Total demand**

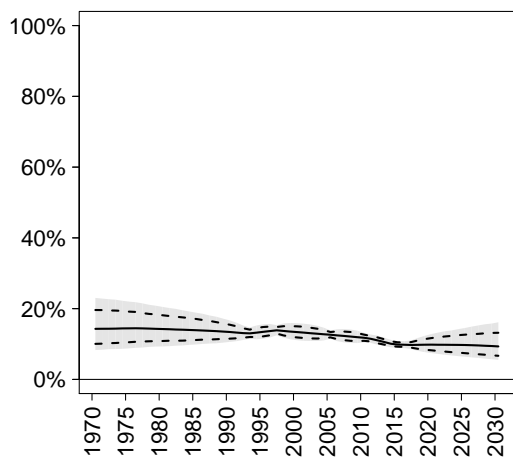

**Demand satisfied (any method)**

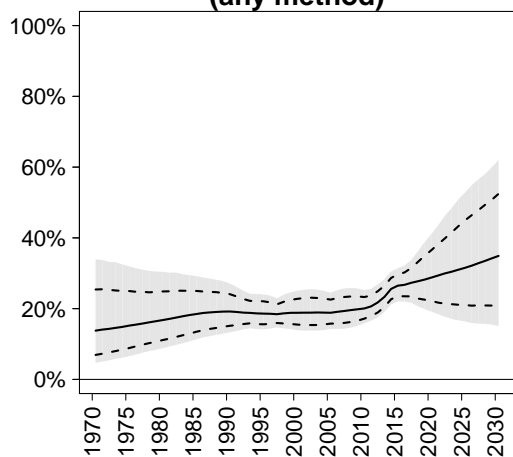

**Demand satisfied (modern methods)**

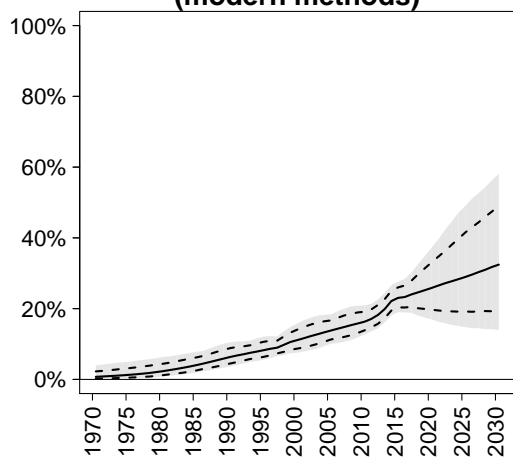

Sierra Leone --- All women

**CP (any)**

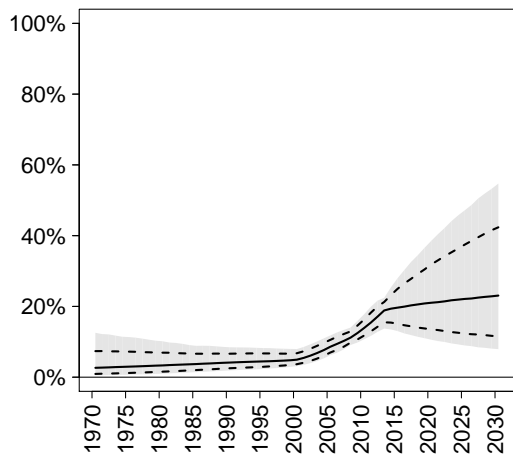

**CP (modern)**

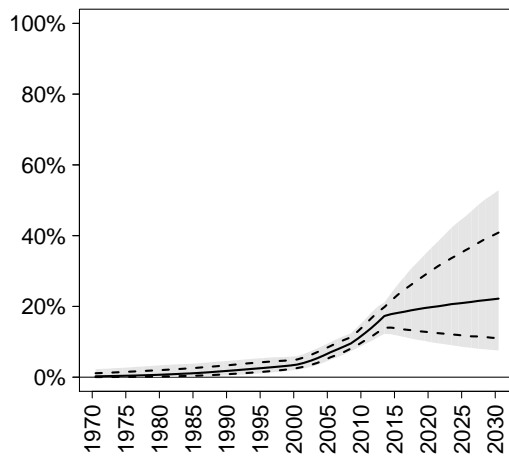

**CP (traditional)**

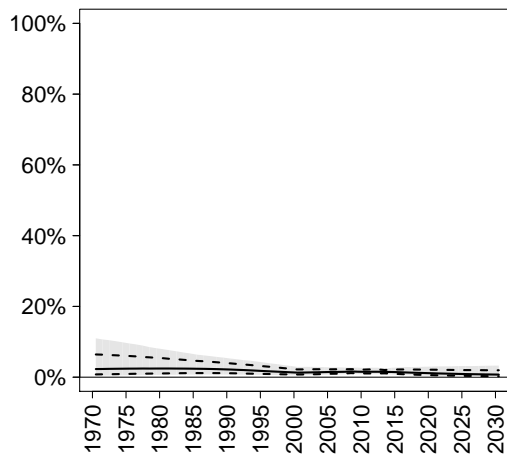

**Unmet need among all unmarried women**

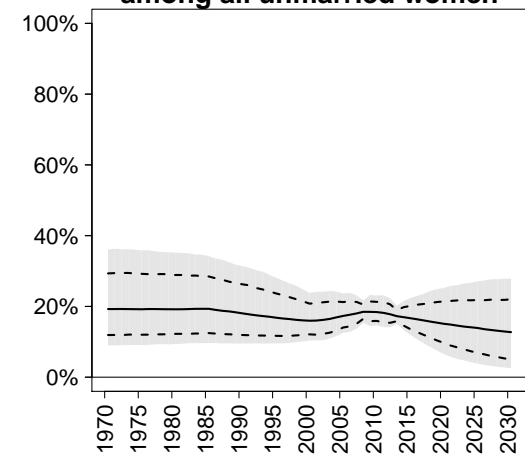

**Total demand**

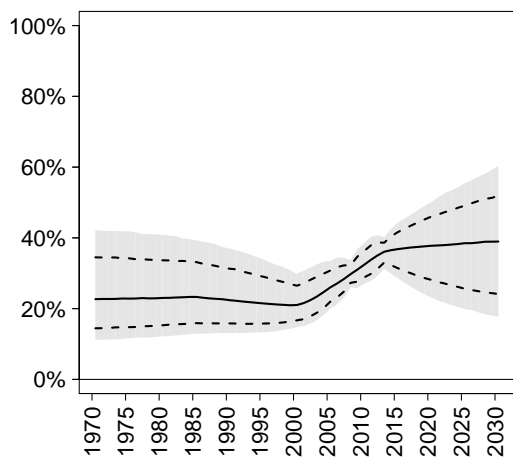

**Demand satisfied (any method)**

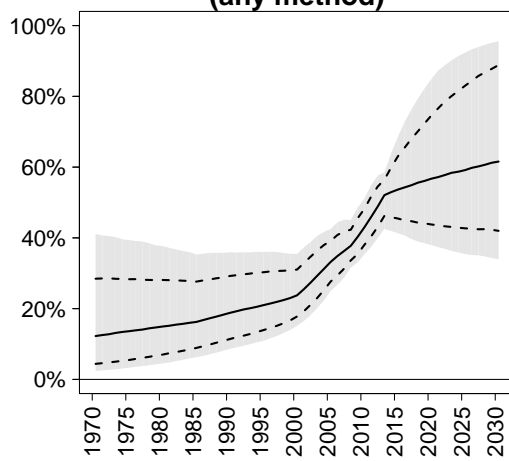

**Demand satisfied (modern methods)**

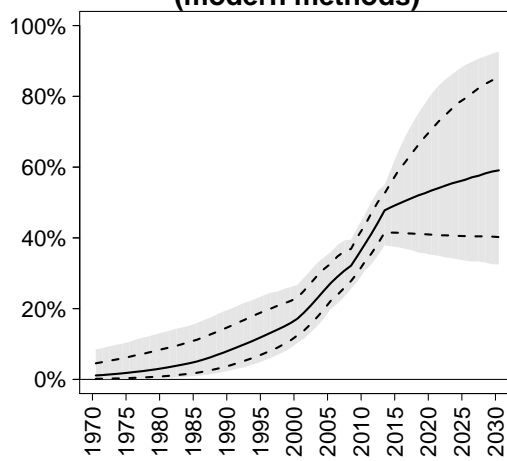

Solomon Islands --- All women

CP (any)

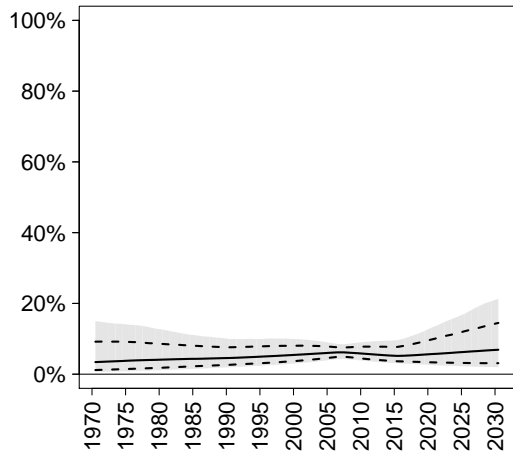

CP (modern)

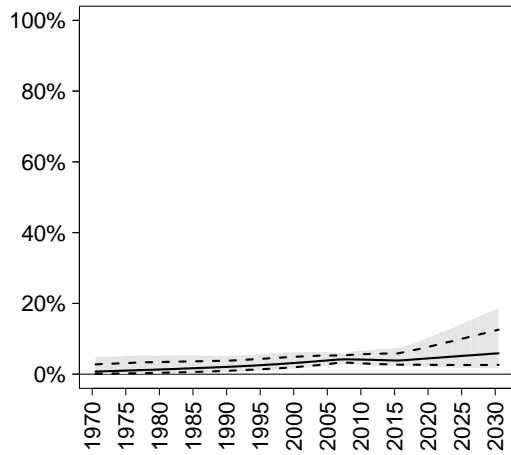

CP (traditional)

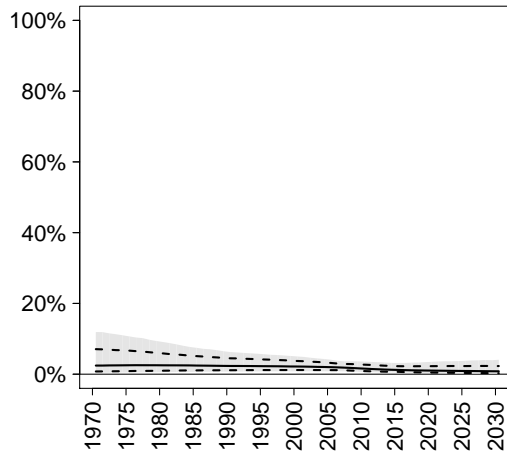

Unmet need among all unmarried women

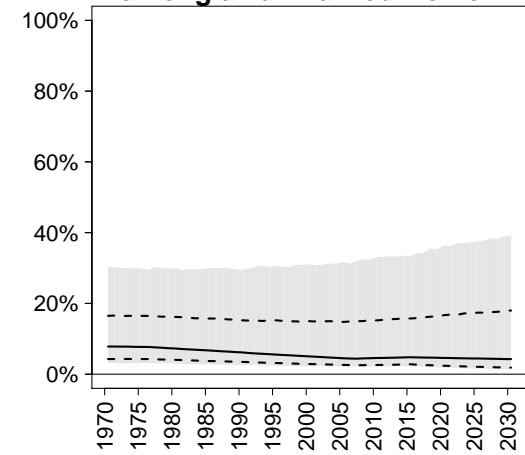

Total demand

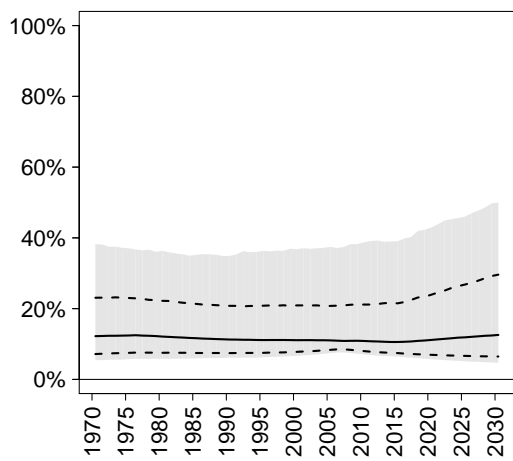

South Africa --- All women

**CP (any)**

**CP (modern)**

**CP (traditional)**

**Unmet need  
among all unmarried women**

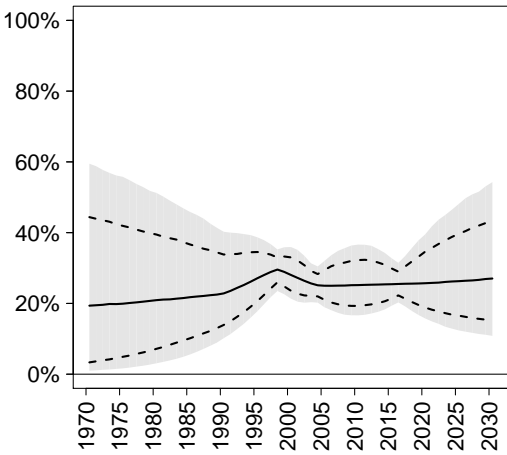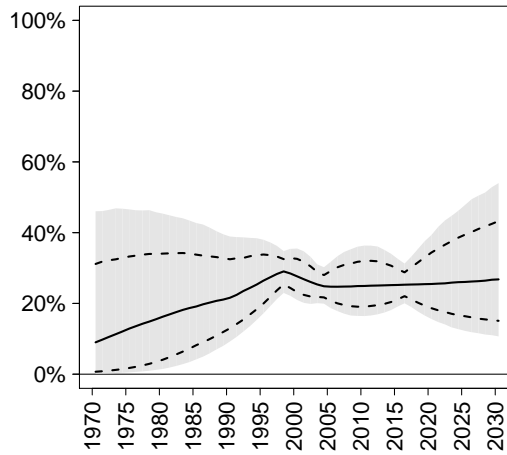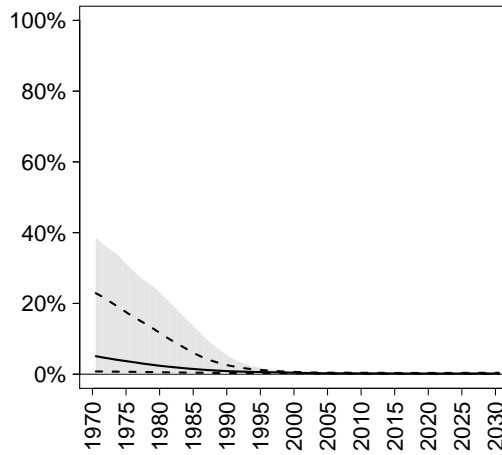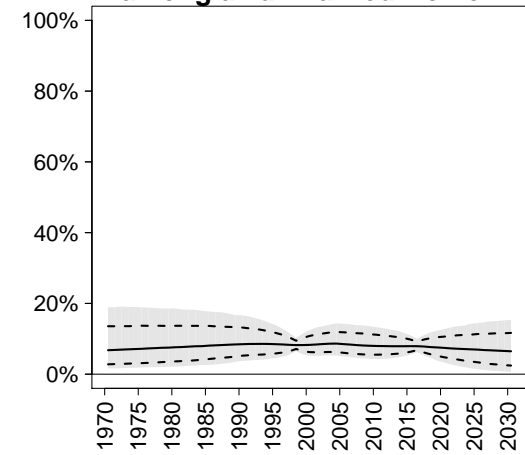

**Total demand**

**Demand satisfied  
(any method)**

**Demand satisfied  
(modern methods)**

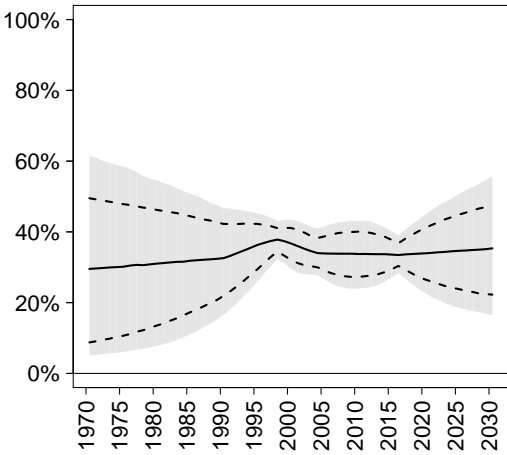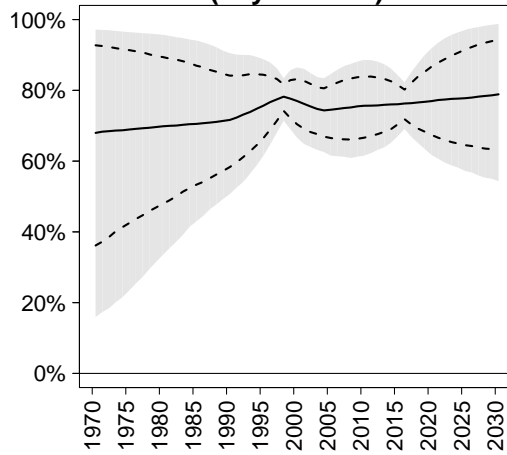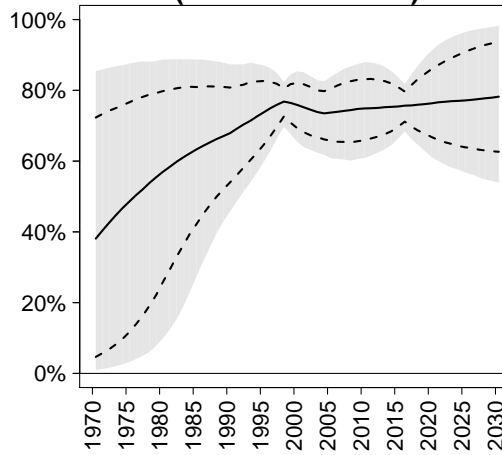

Suriname --- All women

**CP (any)**

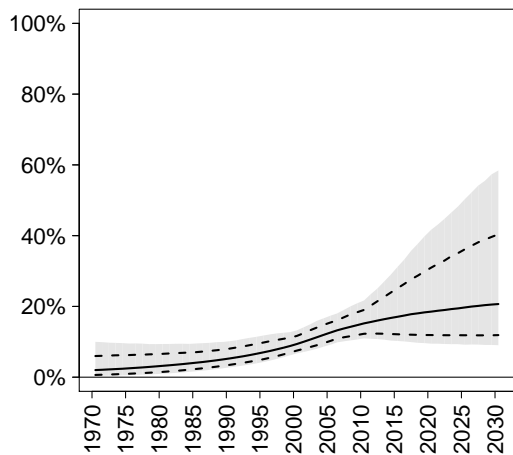

**CP (modern)**

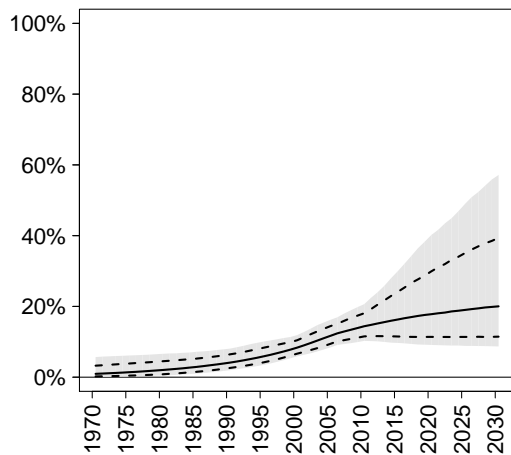

**CP (traditional)**

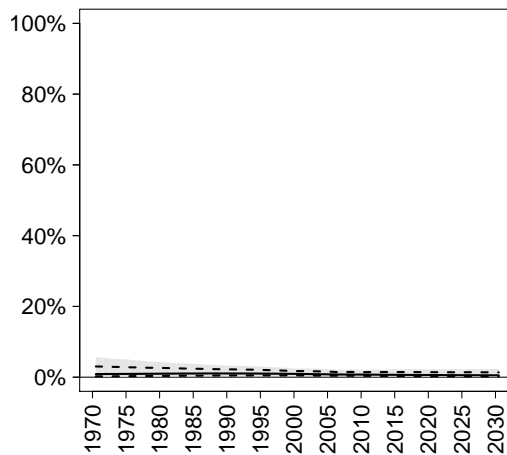

**Unmet need among all unmarried women**

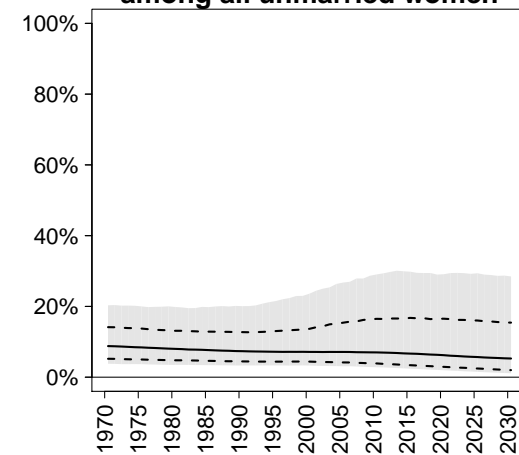

**Total demand**

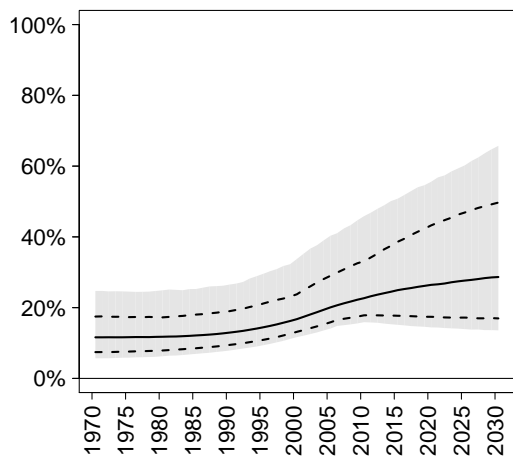

**Demand satisfied (any method)**

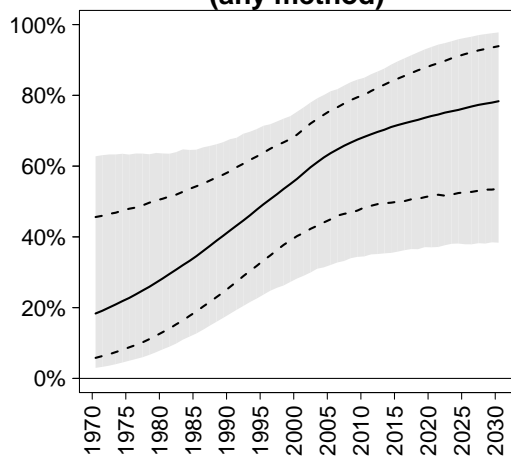

**Demand satisfied (modern methods)**

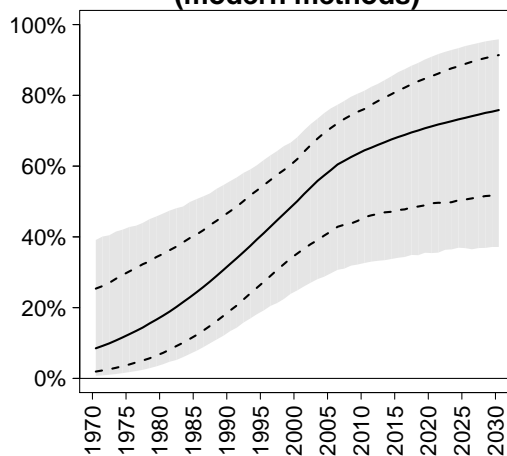

Tajikistan --- All women

CP (any)

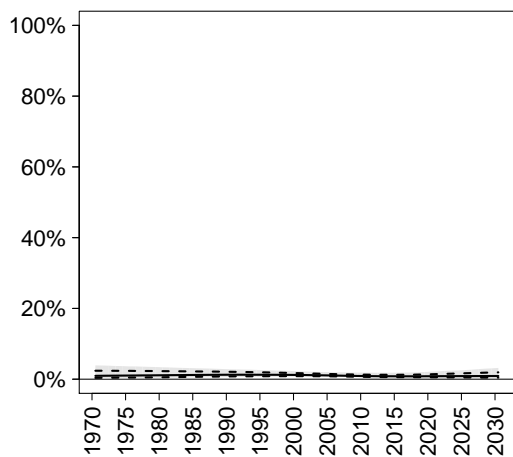

CP (modern)

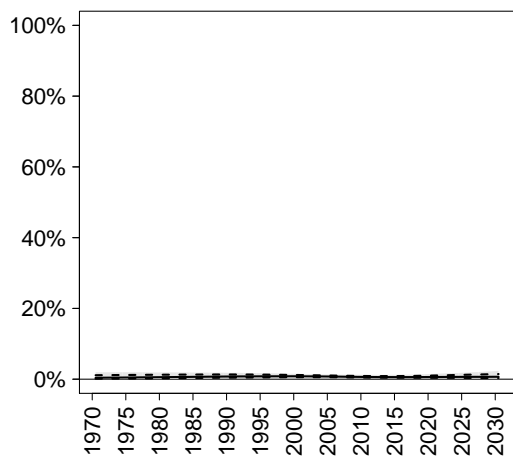

CP (traditional)

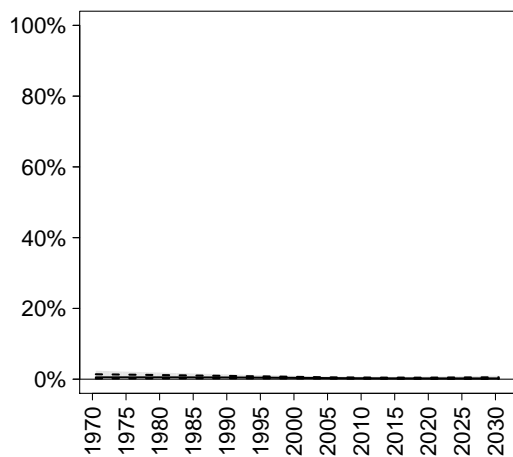

Unmet need among all unmarried women

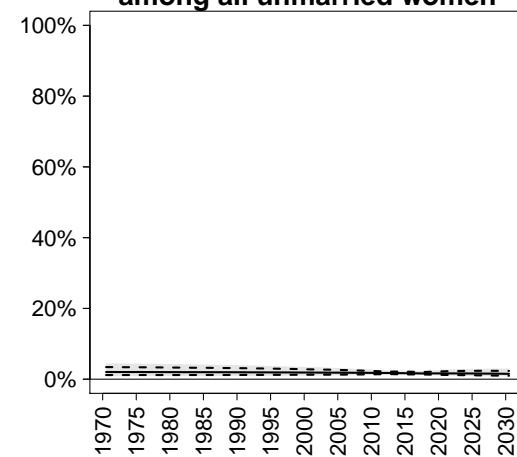

Total demand

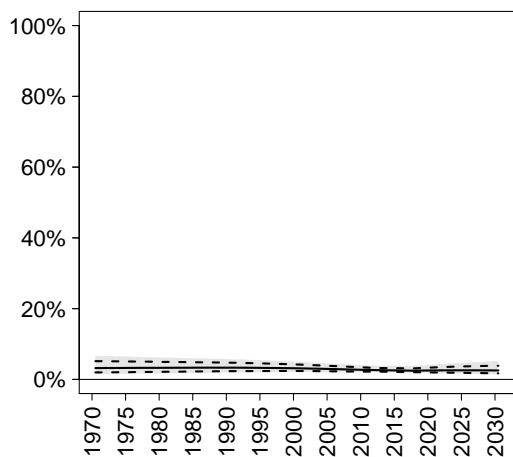

Thailand --- All women

**CP (any)**

**CP (modern)**

**CP (traditional)**

**Unmet need  
among all unmarried women**

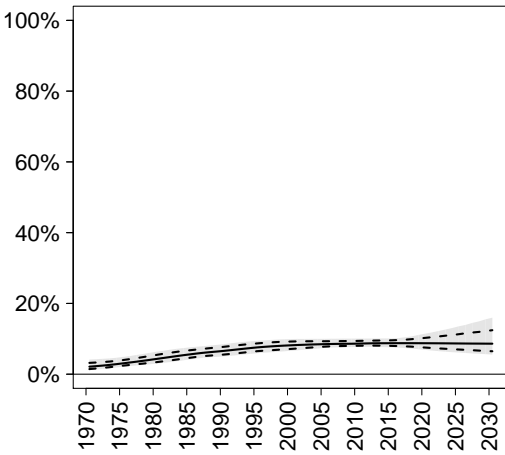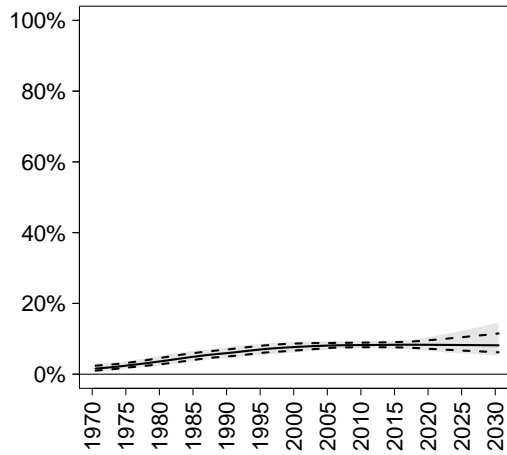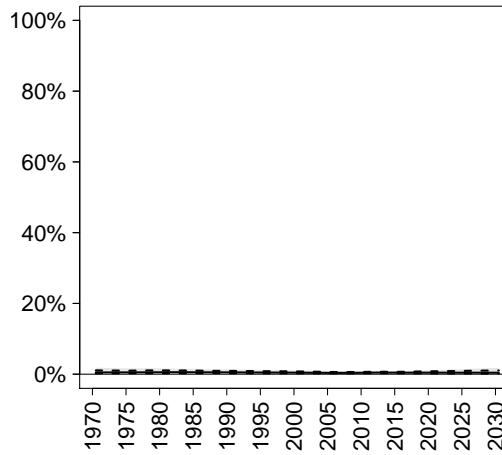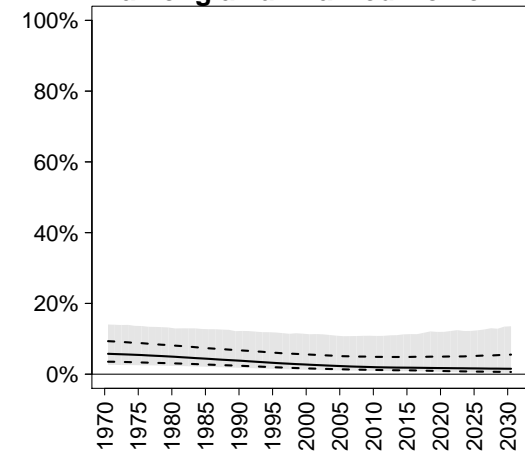

**Total demand**

**Demand satisfied  
(any method)**

**Demand satisfied  
(modern methods)**

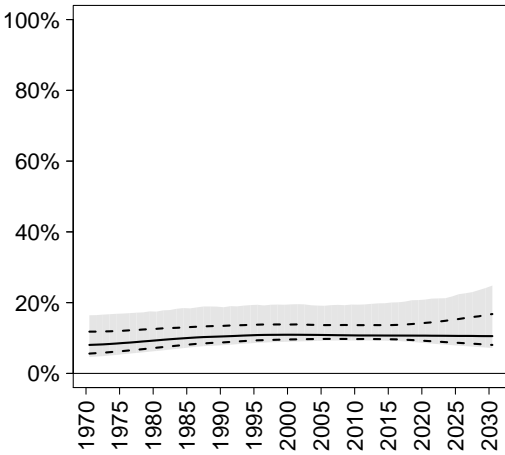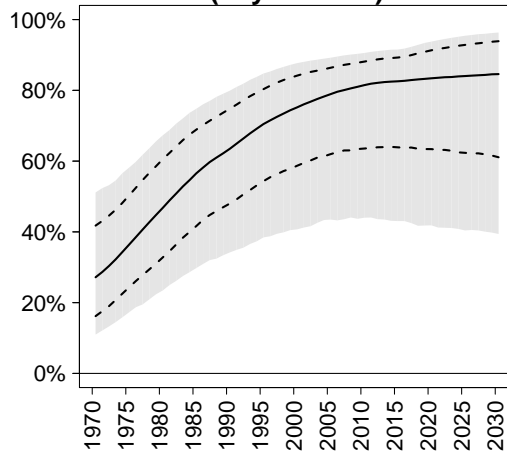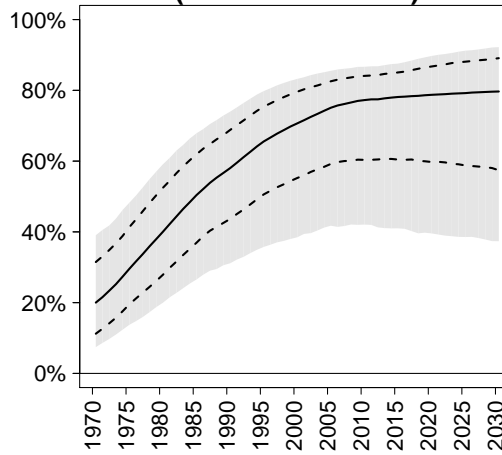



Timor-Leste --- All women

**CP (any)**

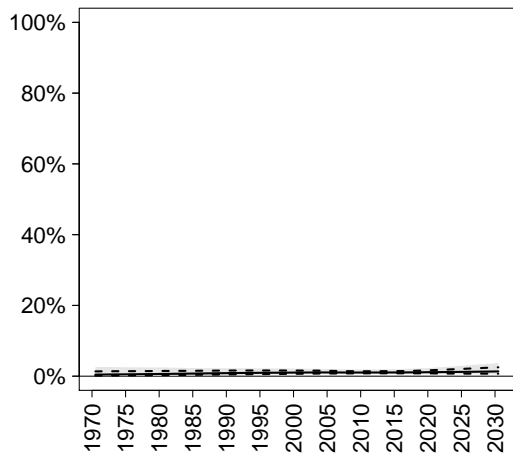

**CP (modern)**

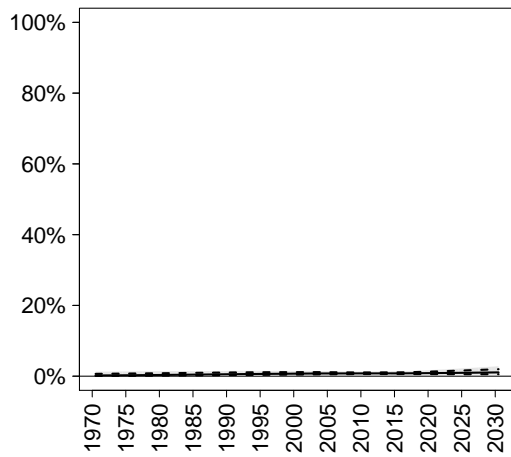

**CP (traditional)**

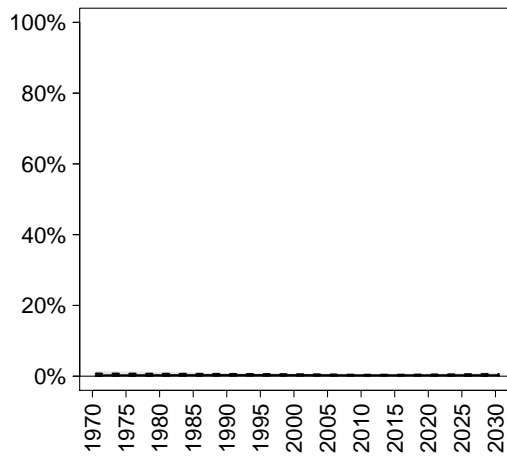

**Unmet need among all unmarried women**

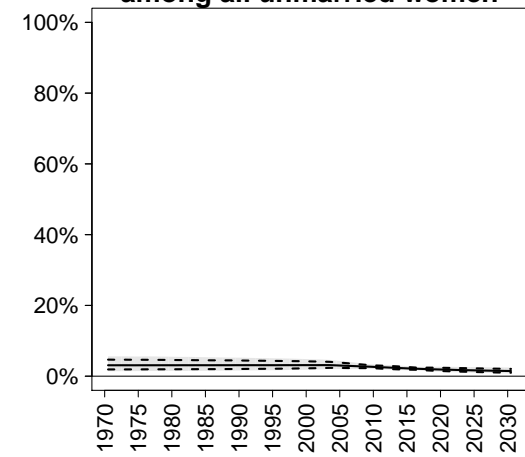

**Total demand**

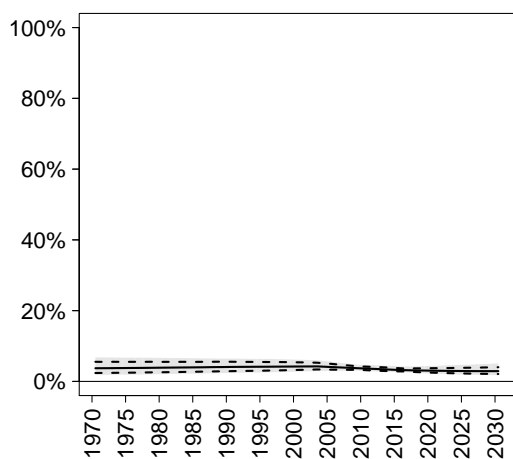

**Demand satisfied (any method)**

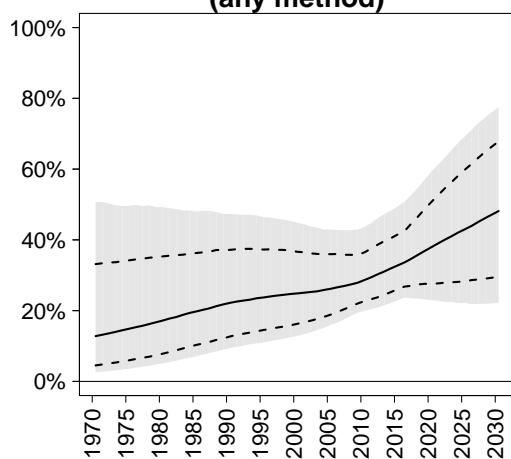

**Demand satisfied (modern methods)**

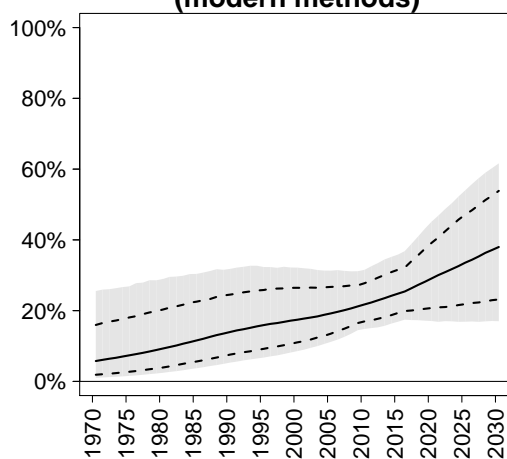

Togo --- All women

**CP (any)**

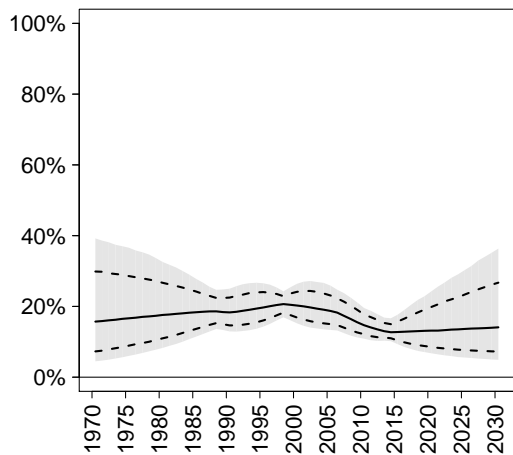

**CP (modern)**

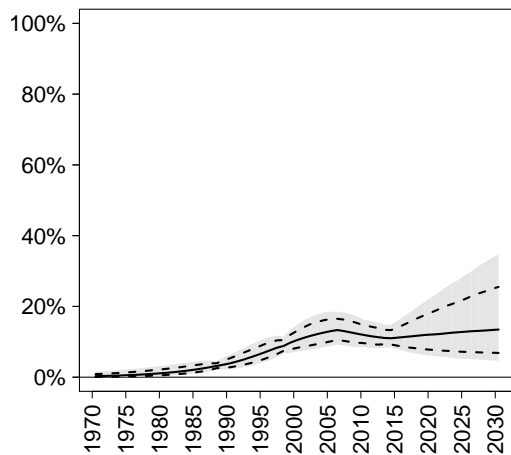

**CP (traditional)**

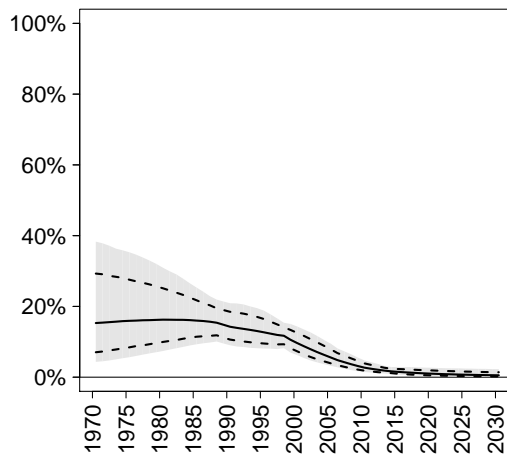

**Unmet need among all unmarried women**

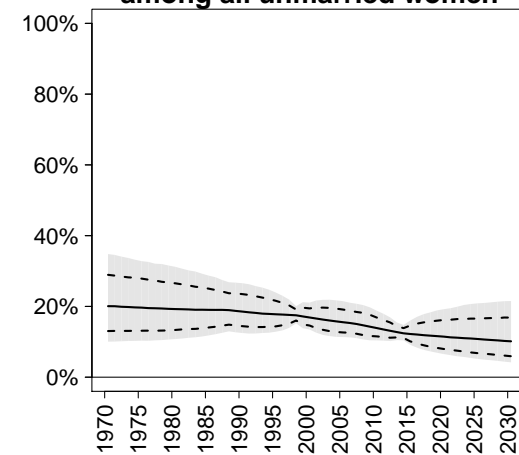

**Total demand**

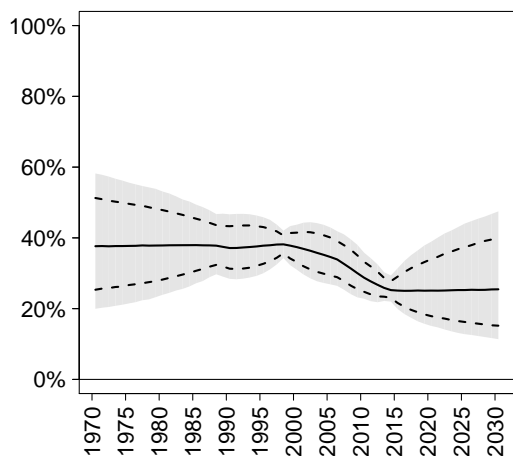

**Demand satisfied (any method)**

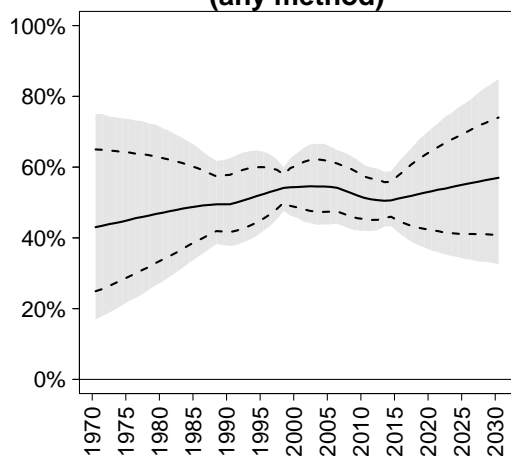

**Demand satisfied (modern methods)**

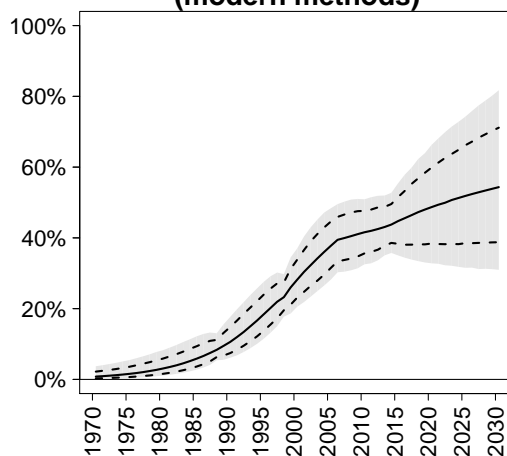

Trinidad and Tobago --- All women

**CP (any)**

**CP (modern)**

**CP (traditional)**

**Unmet need  
among all unmarried women**

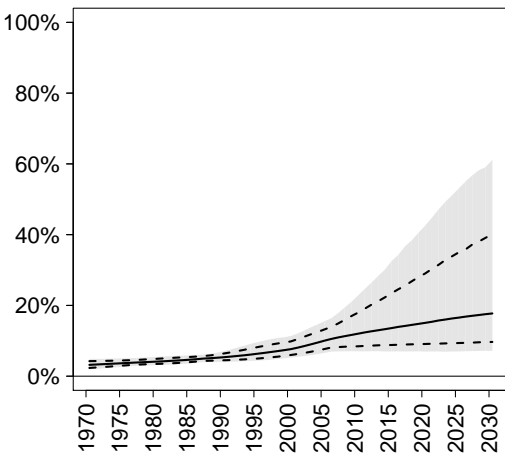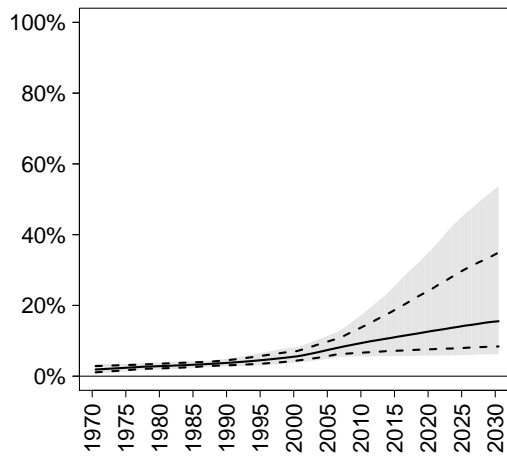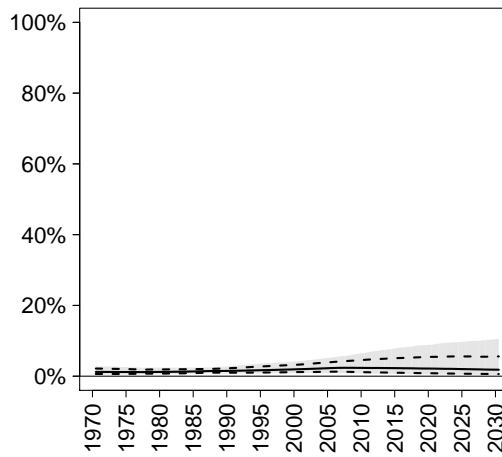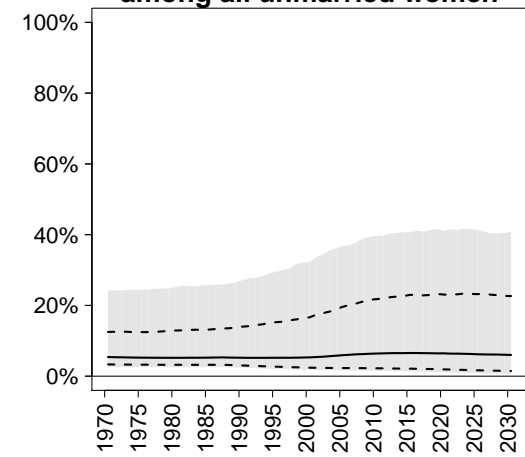

**Total demand**

**Demand satisfied  
(any method)**

**Demand satisfied  
(modern methods)**

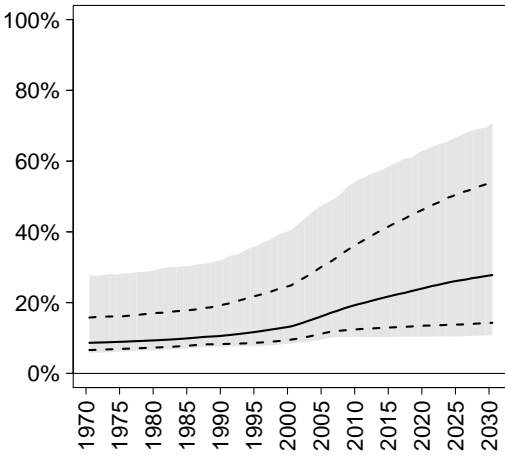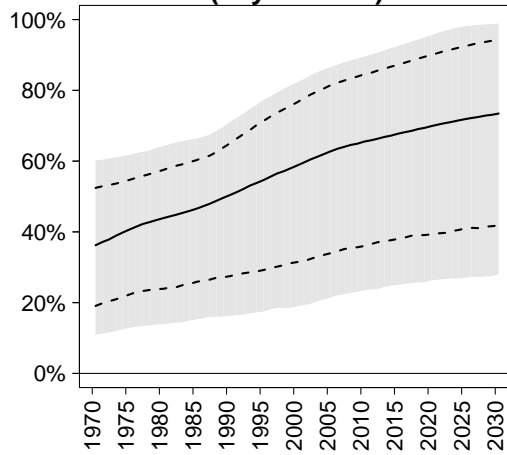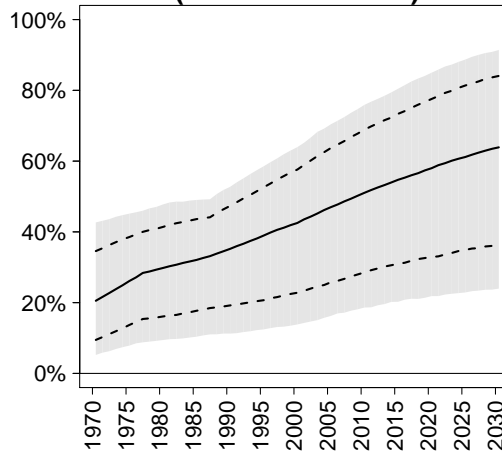

Uganda --- All women

**CP (any)**

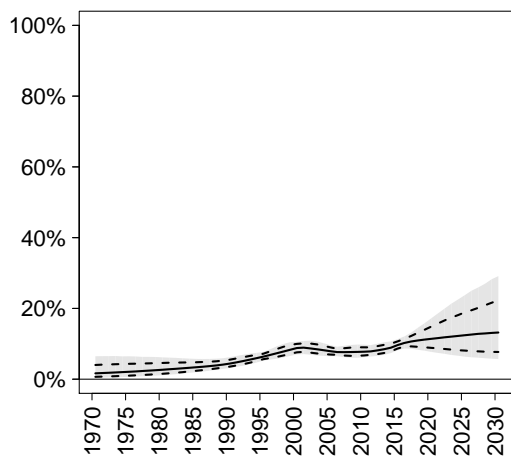

**CP (modern)**

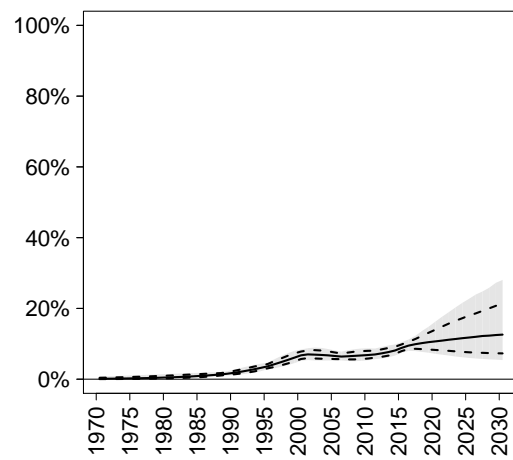

**CP (traditional)**

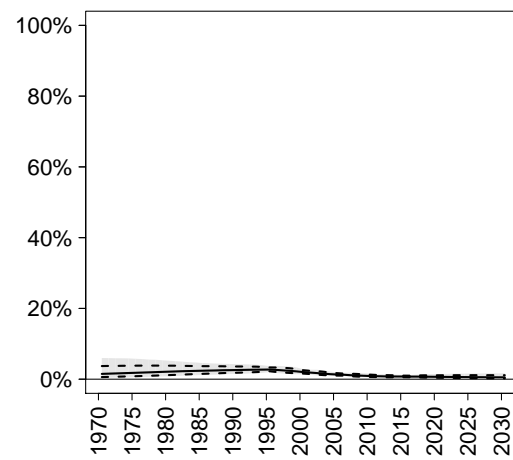

**Unmet need among all unmarried women**

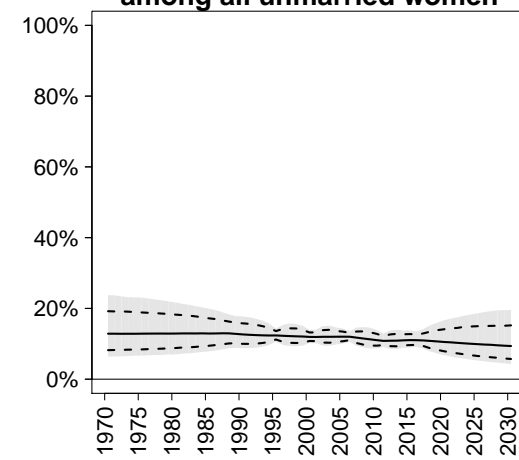

**Total demand**

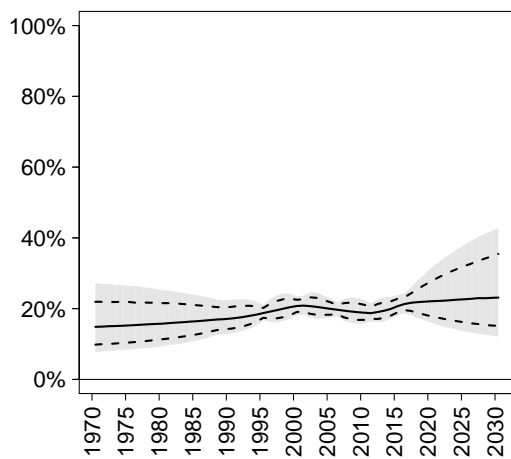

**Demand satisfied (any method)**

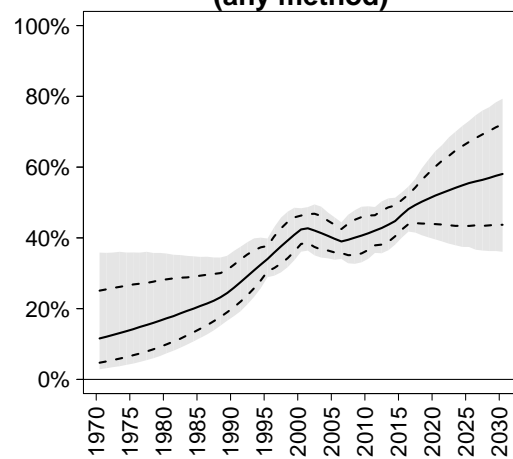

**Demand satisfied (modern methods)**

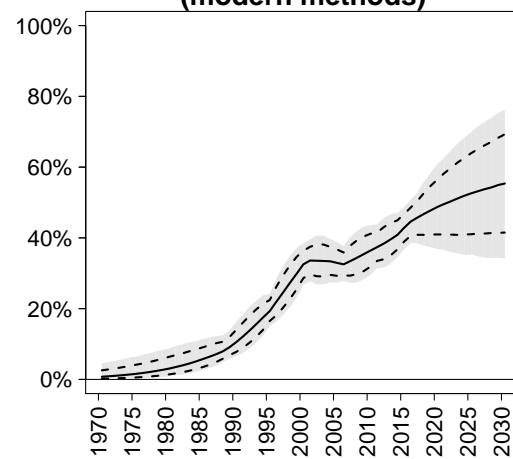

Ukraine --- All women

**CP (any)**

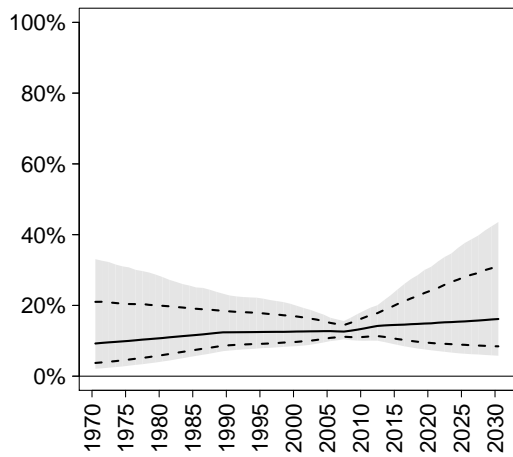

**CP (modern)**

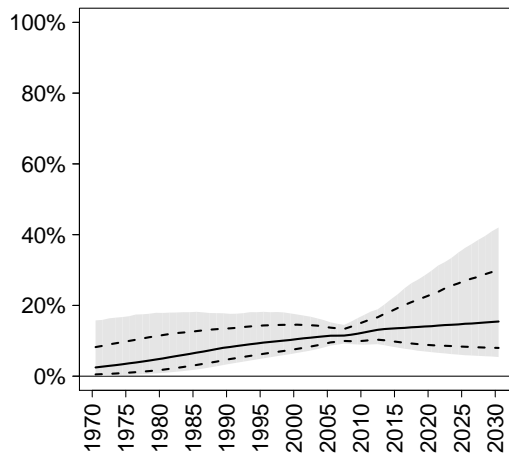

**CP (traditional)**

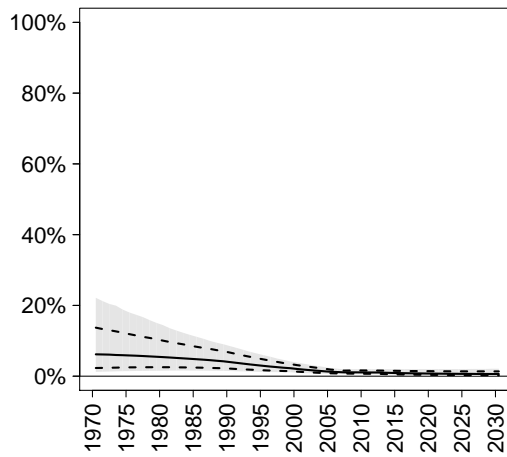

**Unmet need among all unmarried women**

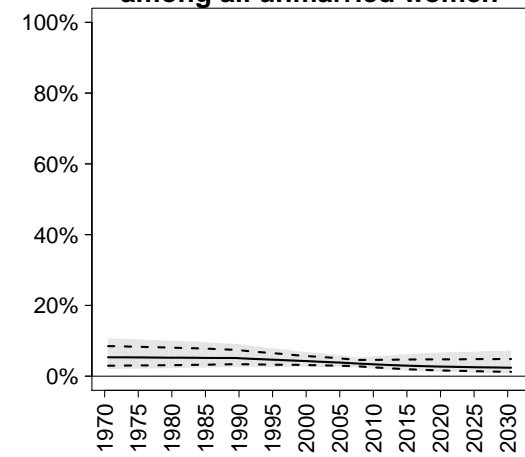

**Total demand**

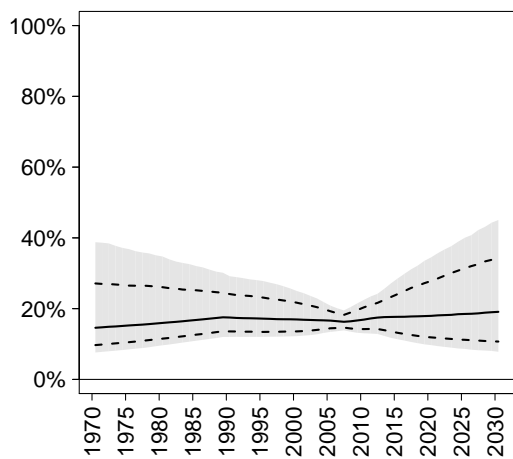

**Demand satisfied (any method)**

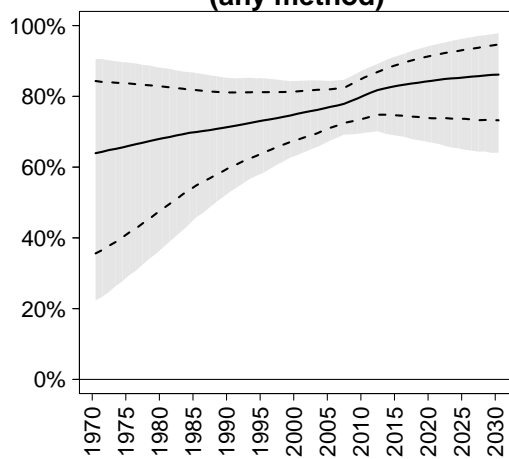

**Demand satisfied (modern methods)**

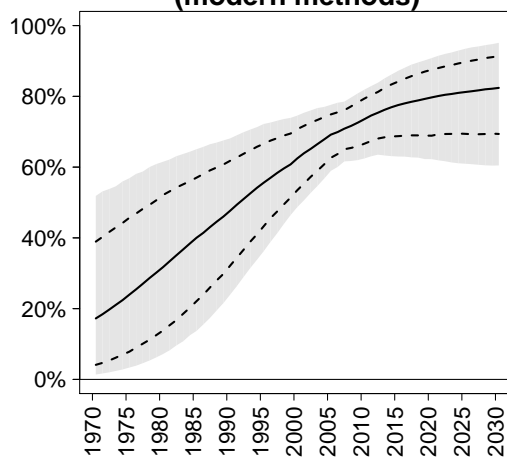

United Republic of Tanzania --- All women

**CP (any)**

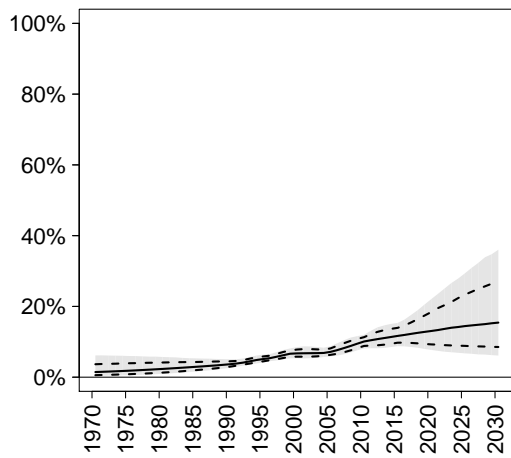

**CP (modern)**

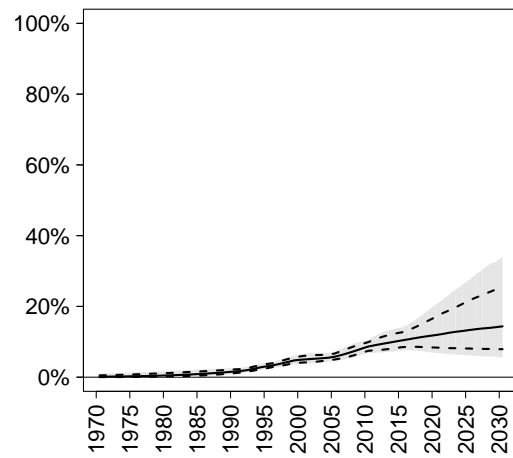

**CP (traditional)**

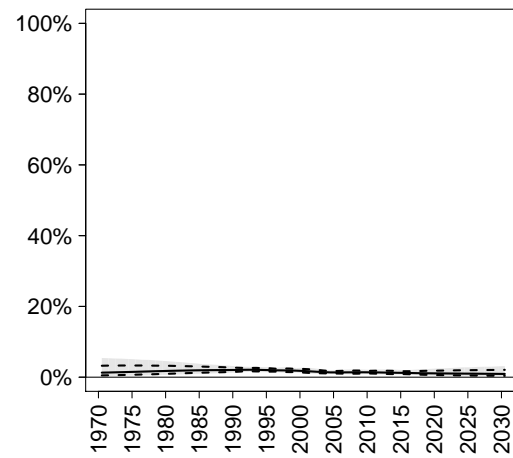

**Unmet need among all unmarried women**

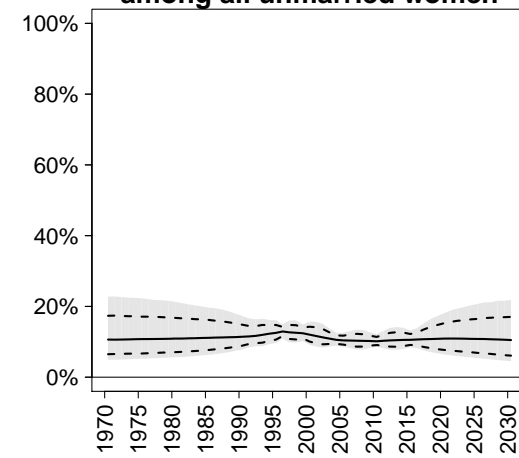

**Total demand**

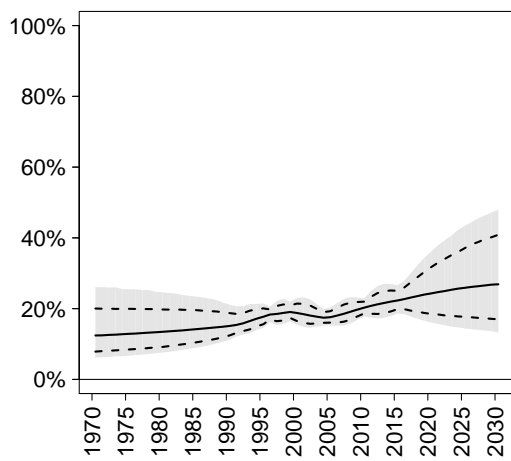

**Demand satisfied (any method)**

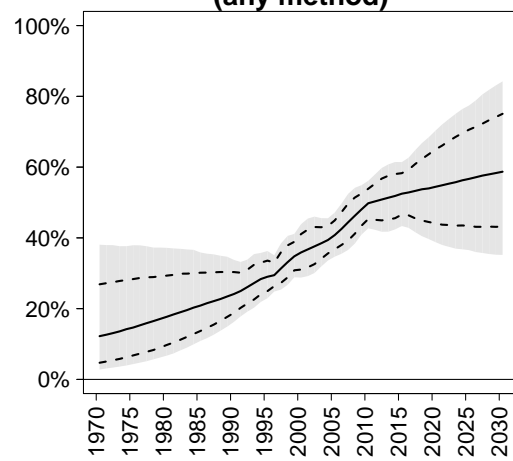

**Demand satisfied (modern methods)**

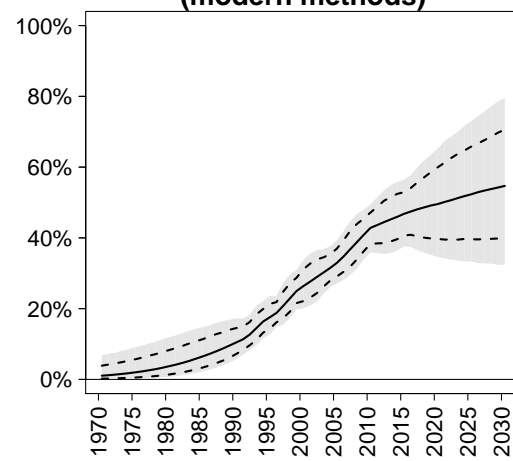

United States of America --- All women

CP (any)

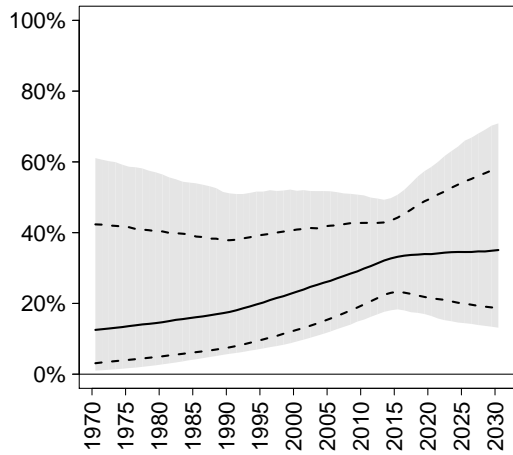

CP (modern)

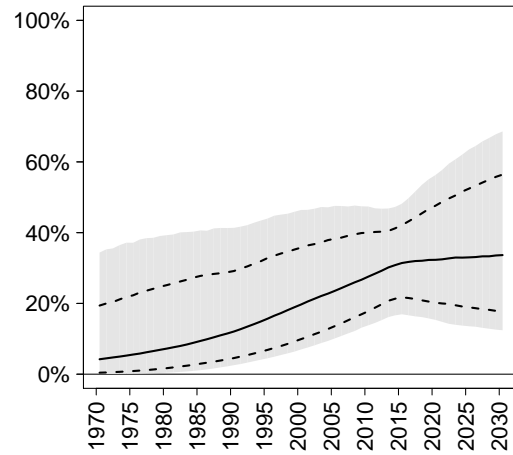

CP (traditional)

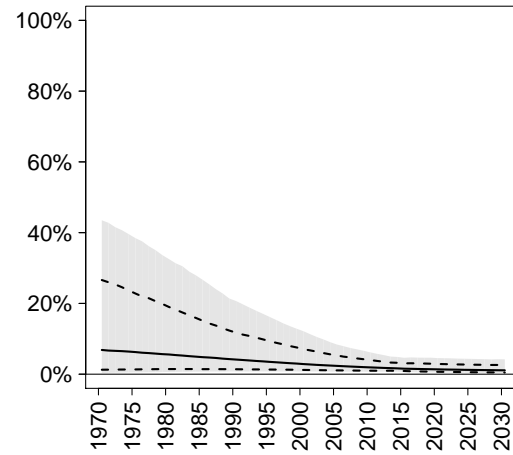

Unmet need among all unmarried women

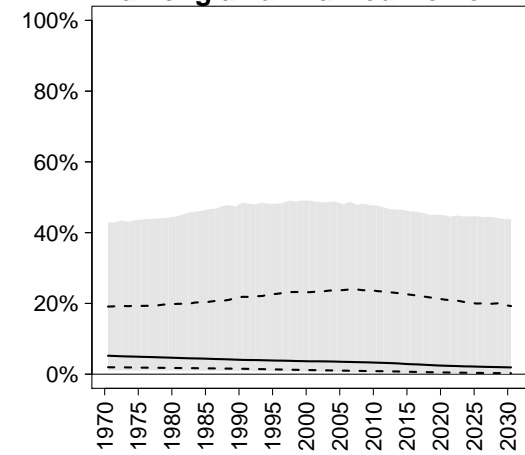

Total demand

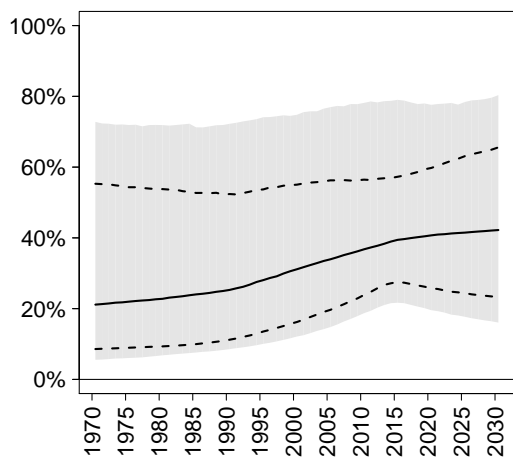

Uzbekistan --- All women

**CP (any)**

**CP (modern)**

**CP (traditional)**

**Unmet need  
among all unmarried women**

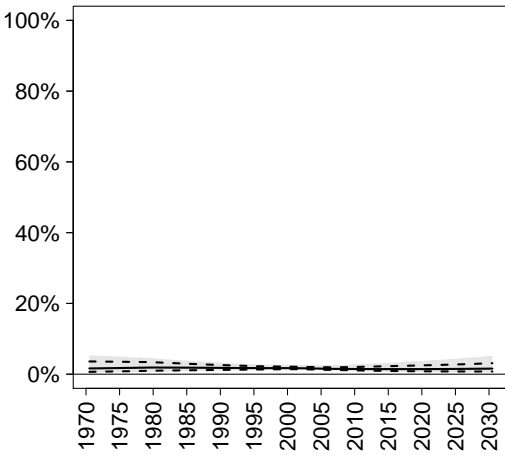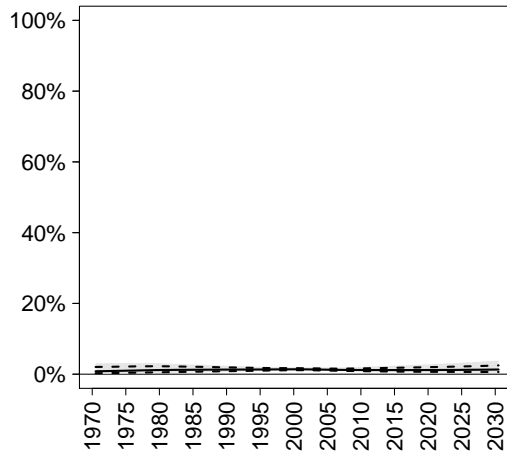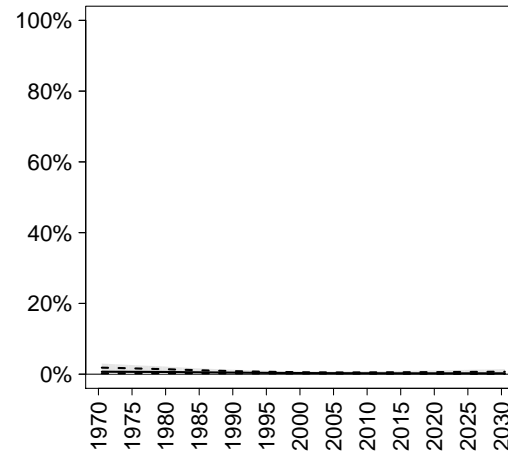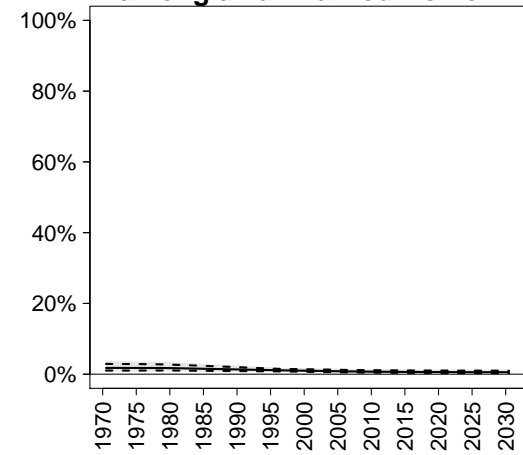

**Total demand**

**Demand satisfied  
(any method)**

**Demand satisfied  
(modern methods)**

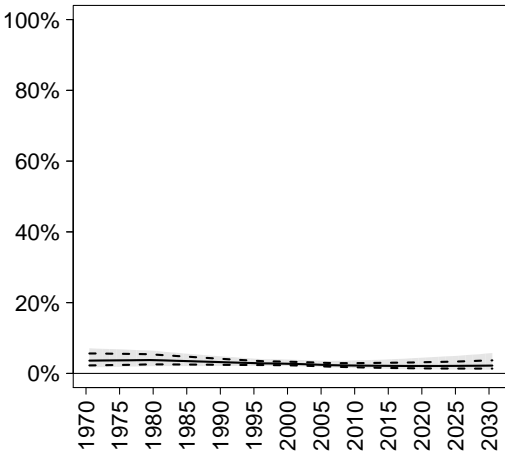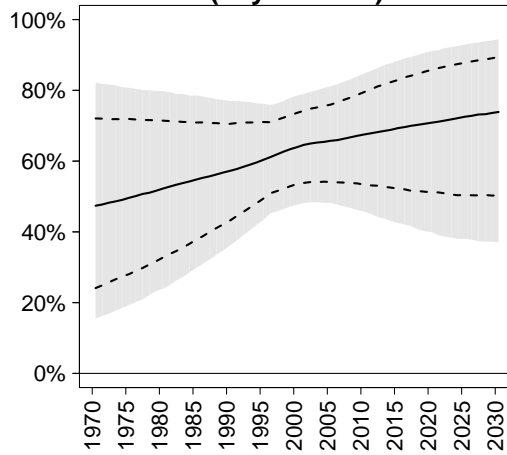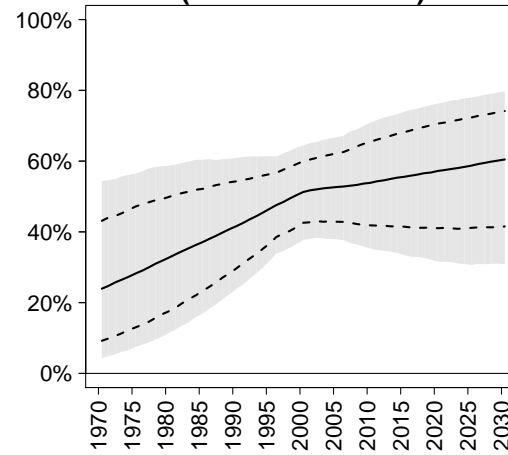



Viet Nam --- All women

**CP (any)**

**CP (modern)**

**CP (traditional)**

**Unmet need  
among all unmarried women**

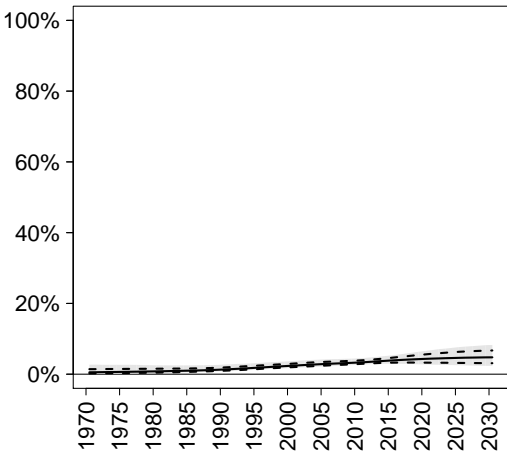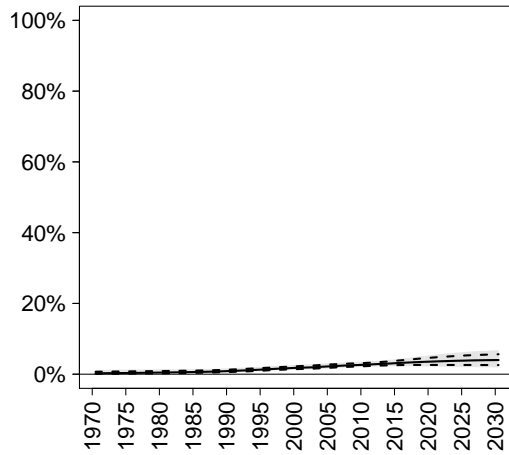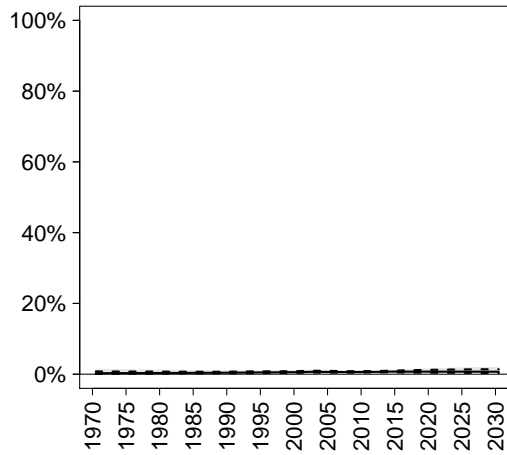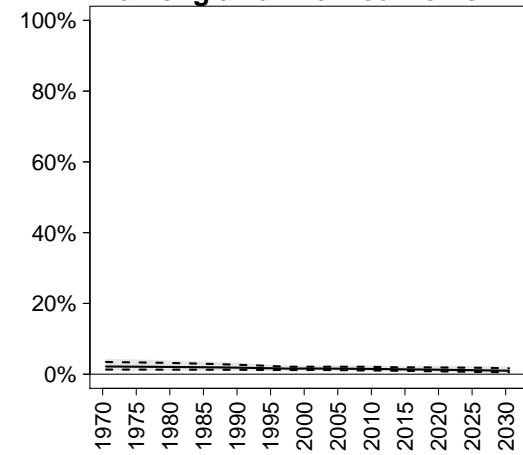

**Total demand**

**Demand satisfied  
(any method)**

**Demand satisfied  
(modern methods)**

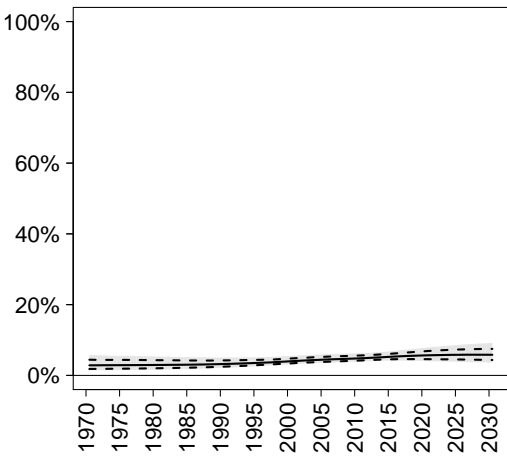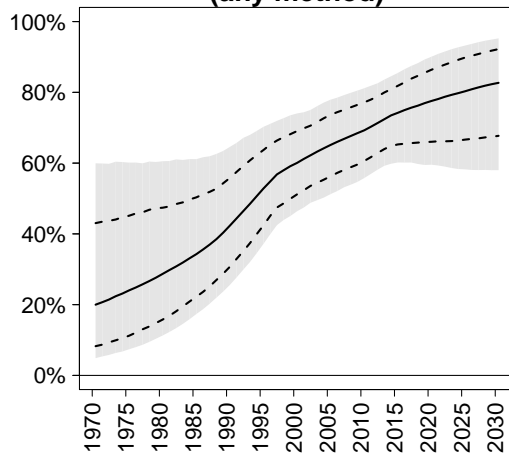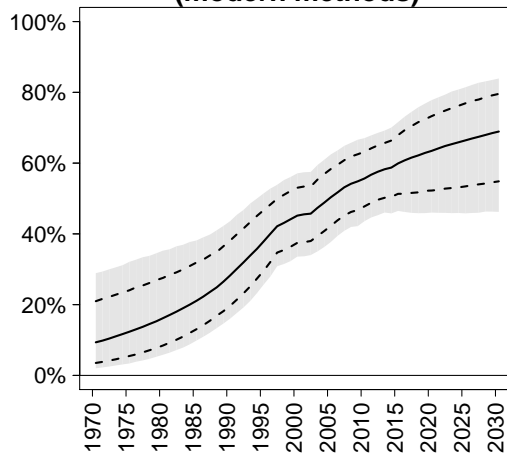

Zambia --- All women

**CP (any)**

**CP (modern)**

**CP (traditional)**

**Unmet need  
among all unmarried women**

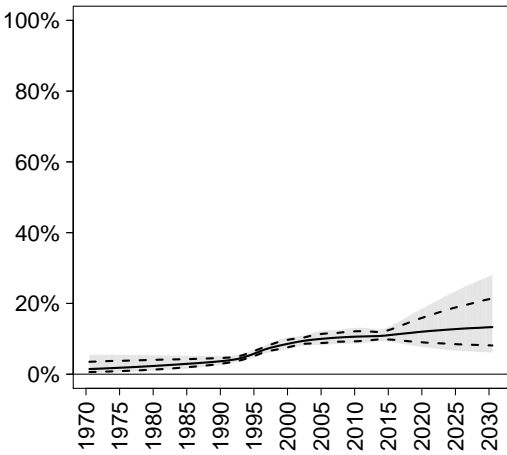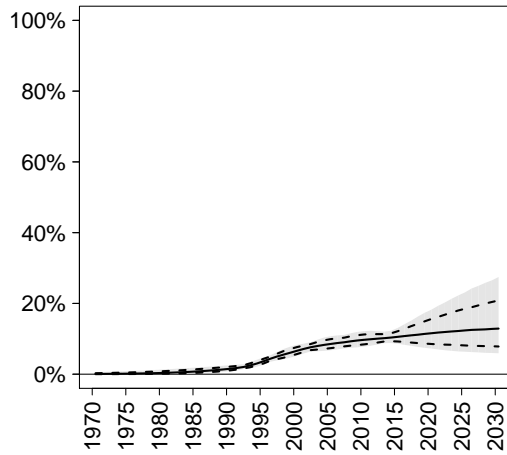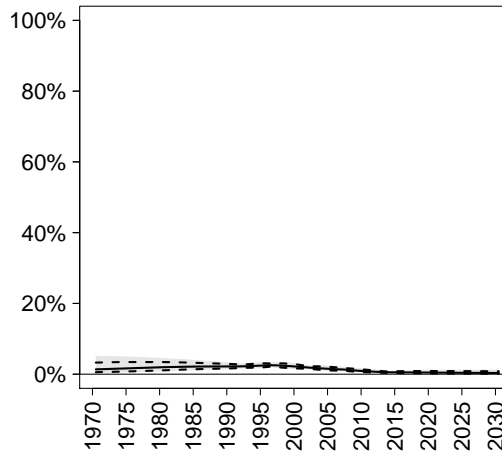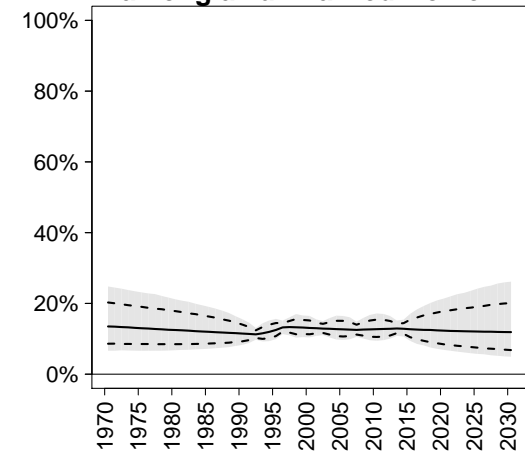

**Total demand**

**Demand satisfied  
(any method)**

**Demand satisfied  
(modern methods)**

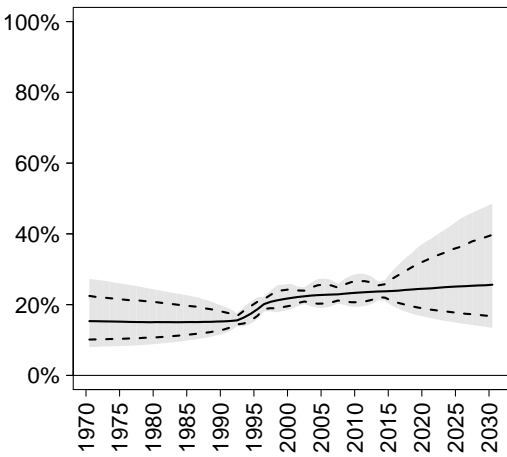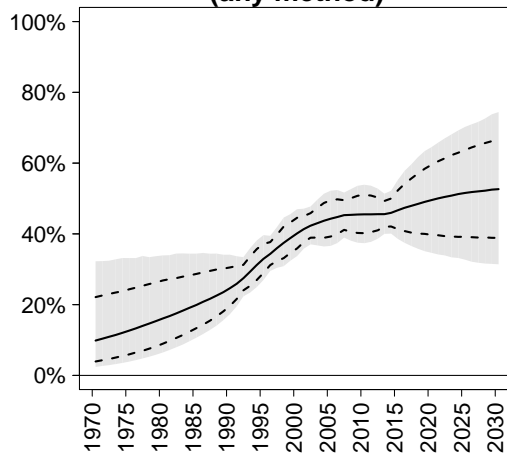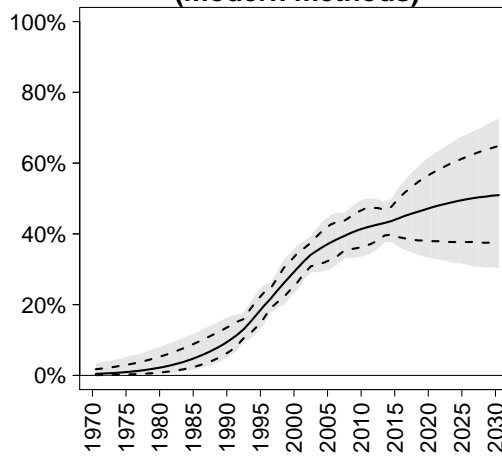

Zimbabwe ---- All women

**CP (any)**

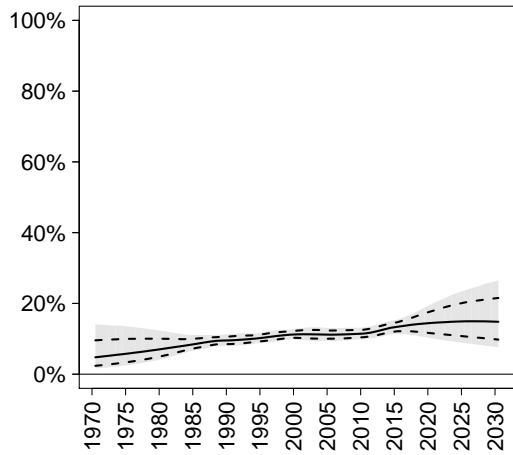

**CP (modern)**

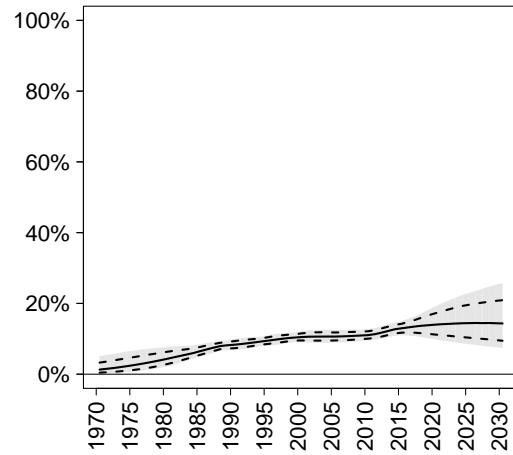

**CP (traditional)**

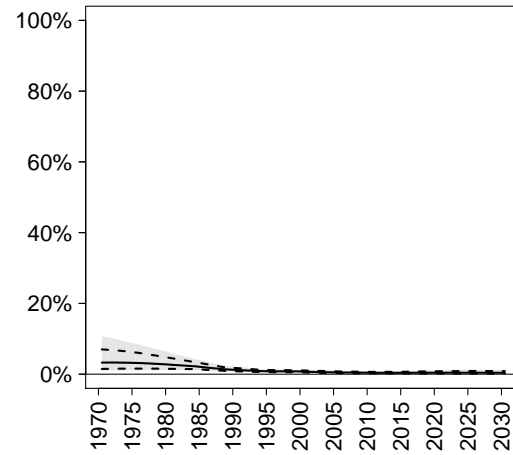

**Unmet need among all unmarried women**

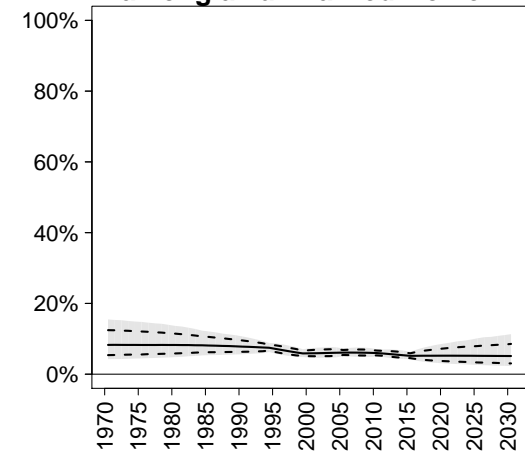

**Total demand**

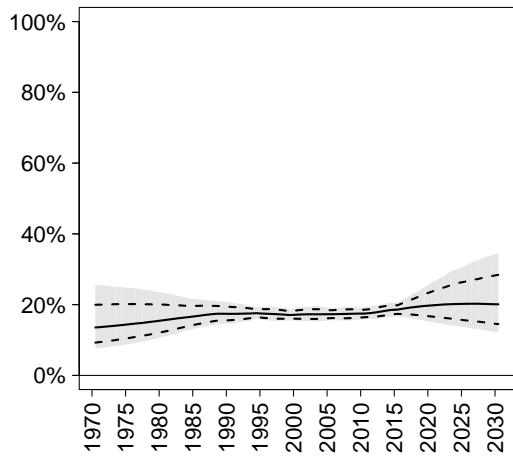

Supplement: pone.0247479.s003.pdf [file pone.0247479.s003.pdf]
