# Supplementary material for: Contraceptive use and needs among adolescent women aged 15–19: Regional and global estimates and projections from 1990 to 2030 from a Bayesian hierarchical modelling study
Source: PubMed Central journal article supplement (PMC7932081; doi:10.1371/journal.pone.0247479), 2021-03-04
Supplement: pone.0247479.s011.pdf [file pone.0247479.s011.pdf]

Contraceptive Use and Needs  
among Adolescent Women Aged 15-19:  
Regional and Global Estimates and Projections from 1990 to 2030  
from a Bayesian Hierarchical Modelling Study  
**S1 APPENDIX: Supplementary Figures**

Vladimíra Kantorová<sup>\*1</sup>, Mark C. Wheldon<sup>1</sup>, Aisha N. Z. Dasgupta<sup>1</sup>, Philipp Ueffing<sup>1</sup>, and  
Helena Cruz Castanheira<sup>2</sup>

<sup>1</sup>United Nations, Department of Economic and Social Affairs, Population Division, New York, NY,  
United States of America<sup>†</sup>

<sup>2</sup>United Nations, Economic Commission for Latin America and the Caribbean, Santiago de Chile,  
Chile<sup>†</sup>

6th May 2020

---

<sup>\*</sup>Corresponding author. Vladimíra Kantorová, Population Division, Department of Economic and Social Affairs, United Nations, [kantorova@un.org](mailto:kantorova@un.org)

<sup>†</sup>The views and opinions expressed in this paper are those of the authors and do not necessarily represent those of the United Nations. This paper has not been formally edited and cleared by the United Nations.

## Contents

|          |                                                          |          |
|----------|----------------------------------------------------------|----------|
| <b>1</b> | <b>Data and Methods</b>                                  | <b>1</b> |
| <b>2</b> | <b>Estimates and Projections for Level 2 Regions</b>     | <b>1</b> |
| <b>3</b> | <b>Ternary Colour Maps with Re-centred Colour Scales</b> | <b>1</b> |
| <b>4</b> | <b>Country-Specific Estimates and Projections</b>        | <b>7</b> |
| 4.1      | Unmarried Adolescent Women . . . . .                     | 7        |
| 4.2      | Married Adolescent Women . . . . .                       | 94       |
| 4.3      | All Adolescent Women . . . . .                           | 225      |

## List of Figures

|   |                                                                                                      |   |
|---|------------------------------------------------------------------------------------------------------|---|
| A | Data availability by region, time-period and marital status. . . . .                                 | 2 |
| B | Estimates and projections by Level 2 regions. . . . .                                                | 3 |
| B | (cont'd). . . . .                                                                                    | 4 |
| C | Ternary colour scheme map with centred colour scheme, unmarried adolescent women aged 15–19. . . . . | 5 |
| D | Ternary colour scheme map with centred colour scheme, all adolescent women aged 15–19. . . . .       | 6 |

## 1 Data and Methods

Data availability by region, time-period, and marital status is summarized in Figure A.

## 2 Estimates and Projections for Level 2 Regions

Estimates and projections are plotted for Level 2 regions in Figure B.

## 3 Ternary Colour Maps with Re-centred Colour Scales

In most countries, the majority of adolescent women aged 15–19 who are unmarried and not in-union experienced no need for family planning in 2019. This makes it difficult to identify relative differences among countries from a plot using a ternary colour scale centred at the point  $(1/3, 1/3, 1/3)$ , as in Figures 8 and 9 in the main article. Relative differences can be highlighted by re-centring the colour scale to the compositional mean (e.g., Pawlowsky-Glahn et al., 2015) of the data. We do this for unmarried and all women in Figures C and D. Maps with centred colour schemes are useful for comparing countries in the same population (i.e., in the same map). They cannot be used for cross-population comparisons.

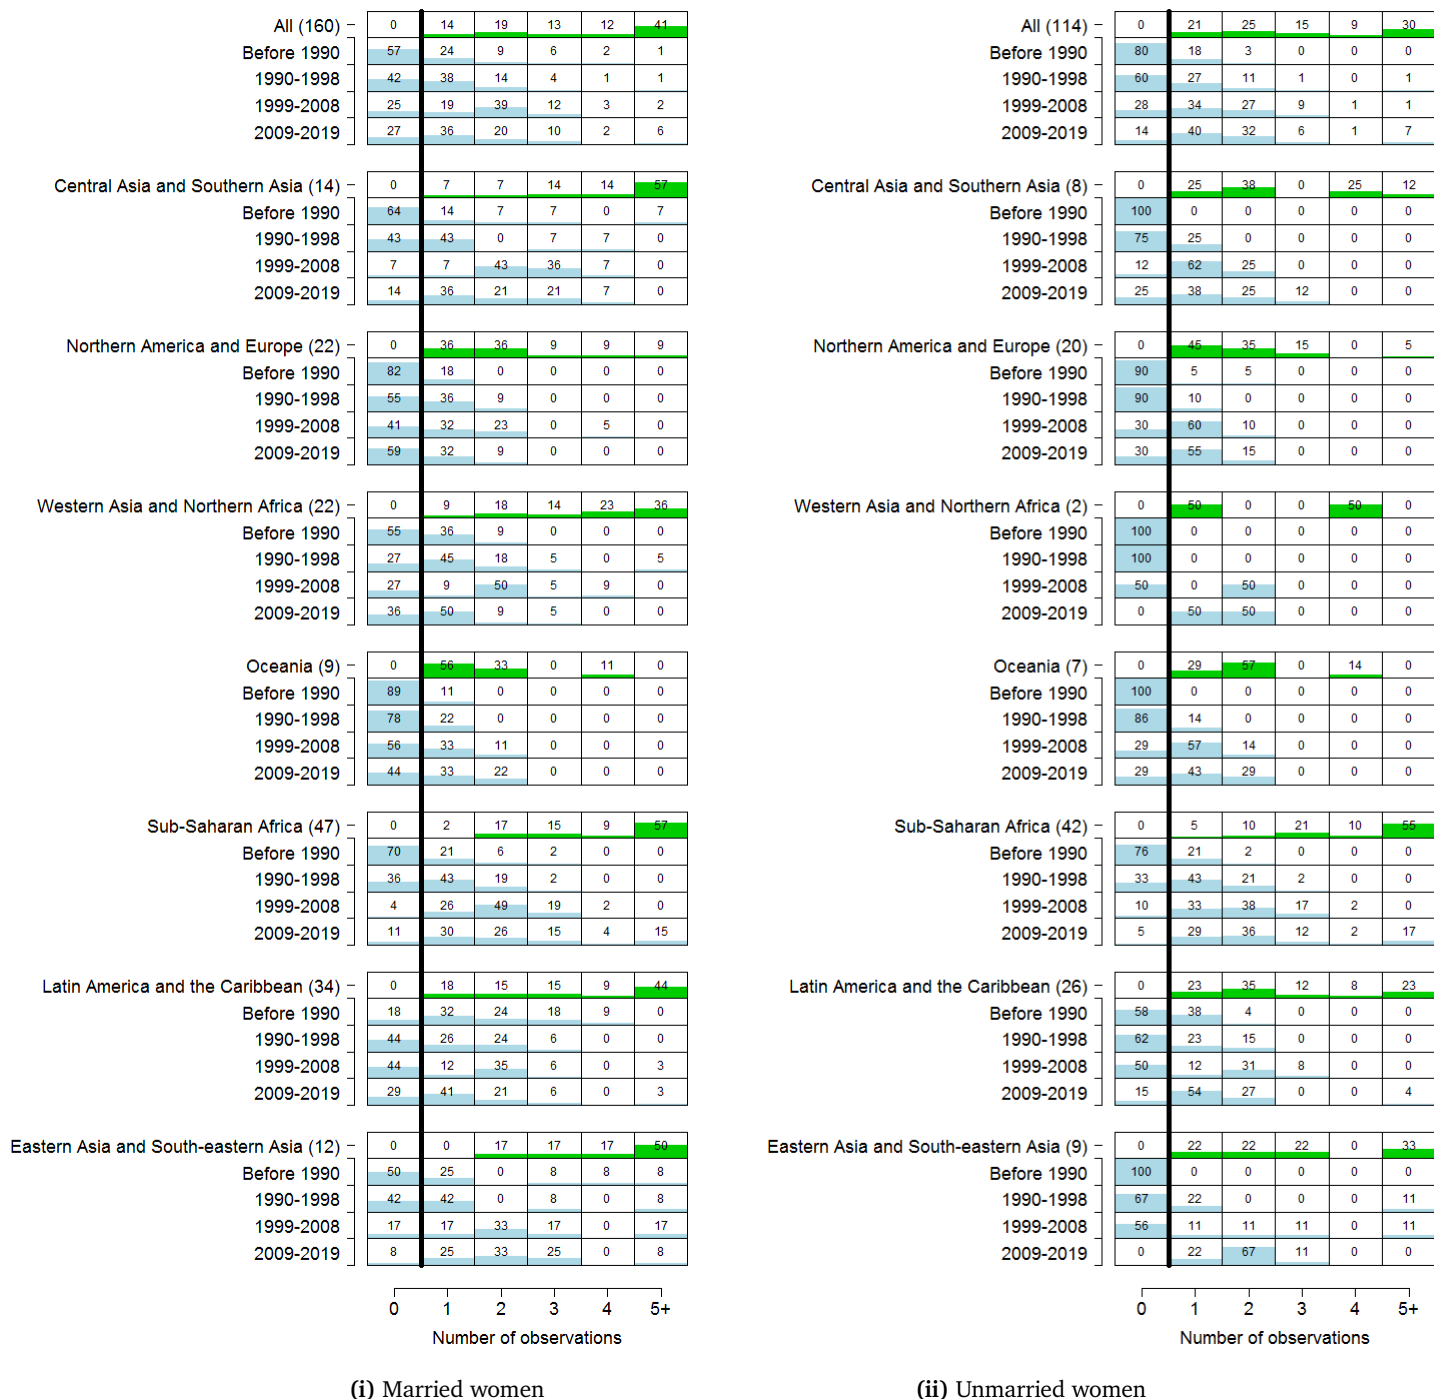

**Figure A. Data availability by region, time-period and marital status.** Proportion of countries by number of observations of contraceptive prevalence (any method) by region and time period for (i) married and (ii) unmarried women aged 15–19. The cells give the percentage of all countries for the given region and time period with the number of observations according to column. The cells sum to 100 (within rounding) across each row. The numbers in parentheses next to the region names are the number of countries in that region with at least one observation



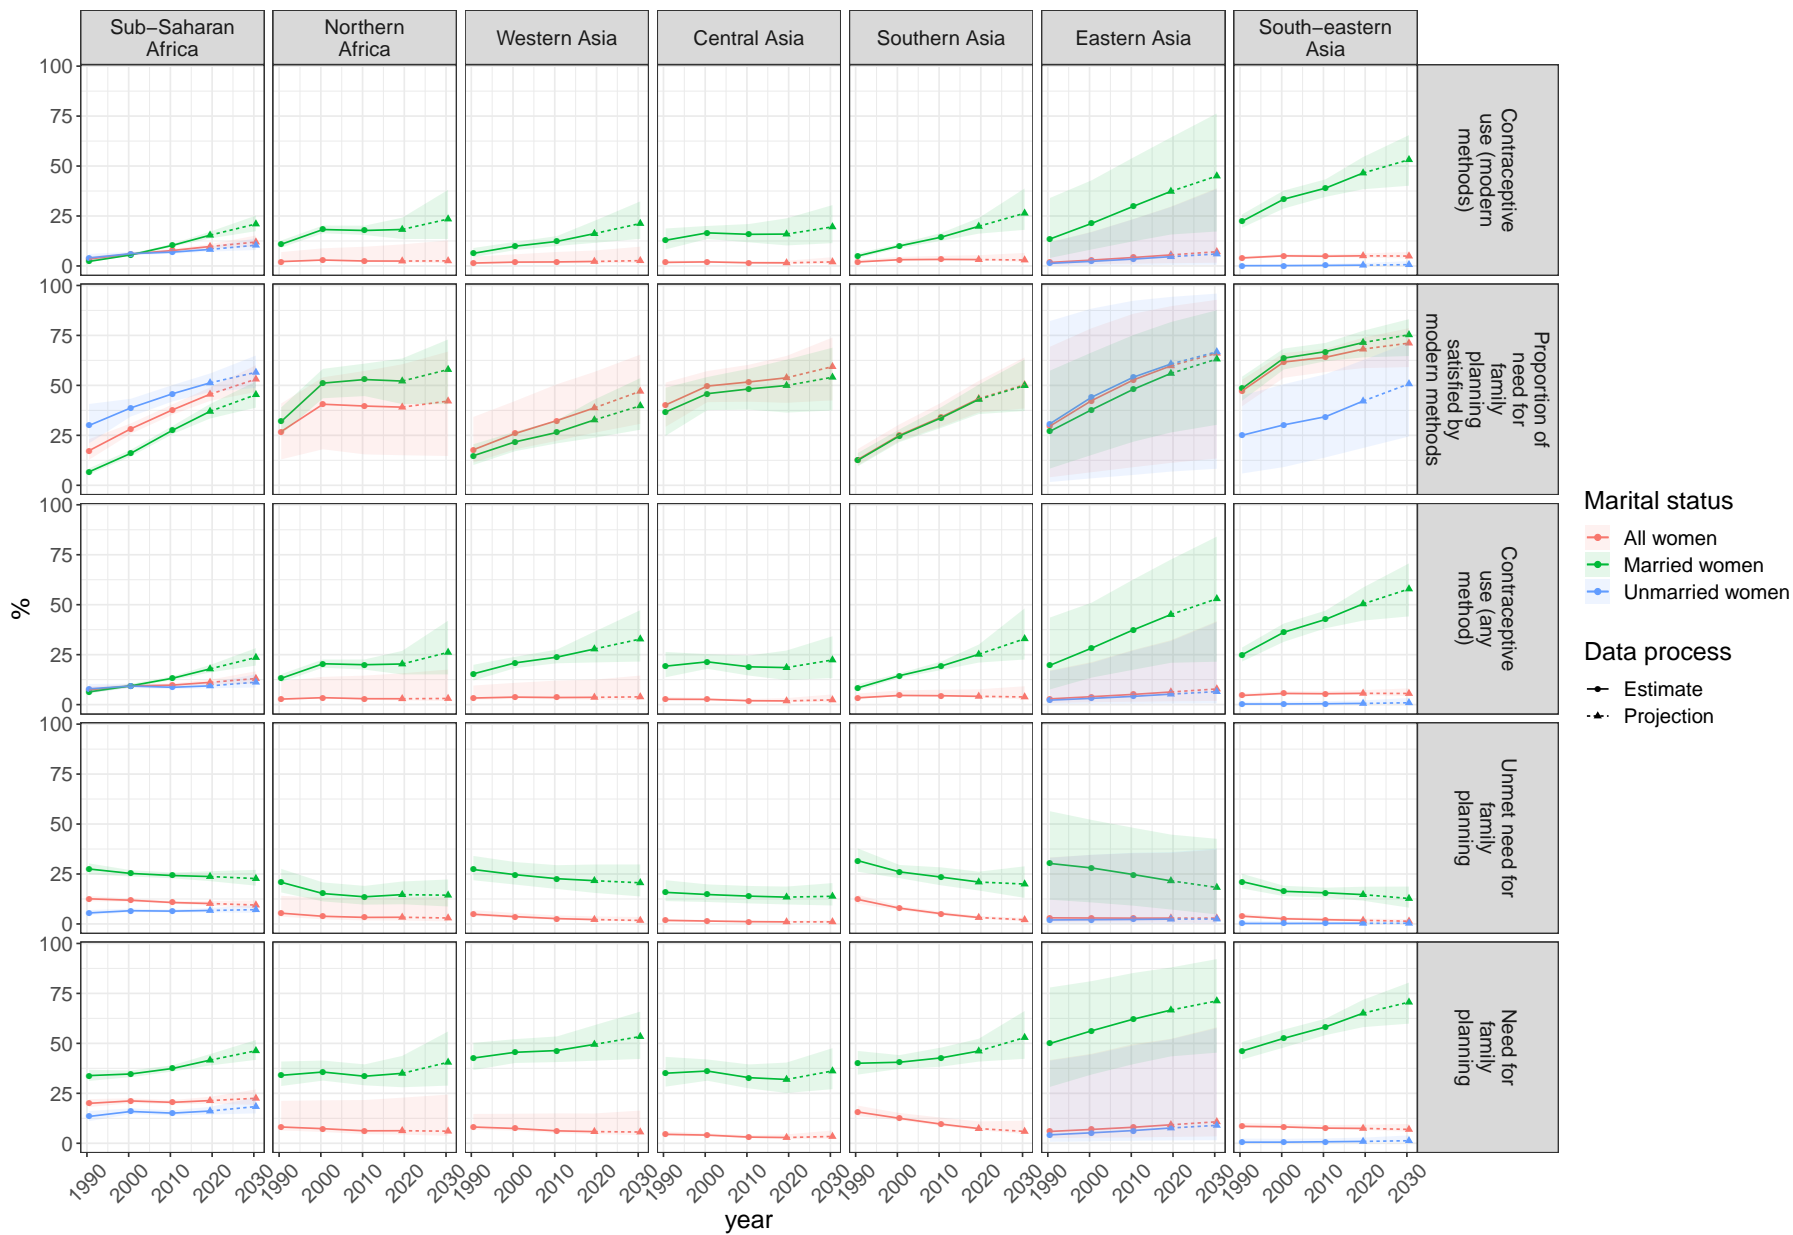

(i)

**Figure B.** Estimates and projections of the proportion of adolescent women (15-19 years) using contraception (any method and modern methods) and having unmet need for family planning, by marital status and regions, 1990–2030. Given are the posterior medians (solid lines) posterior 95% uncertainty intervals (ribbons).

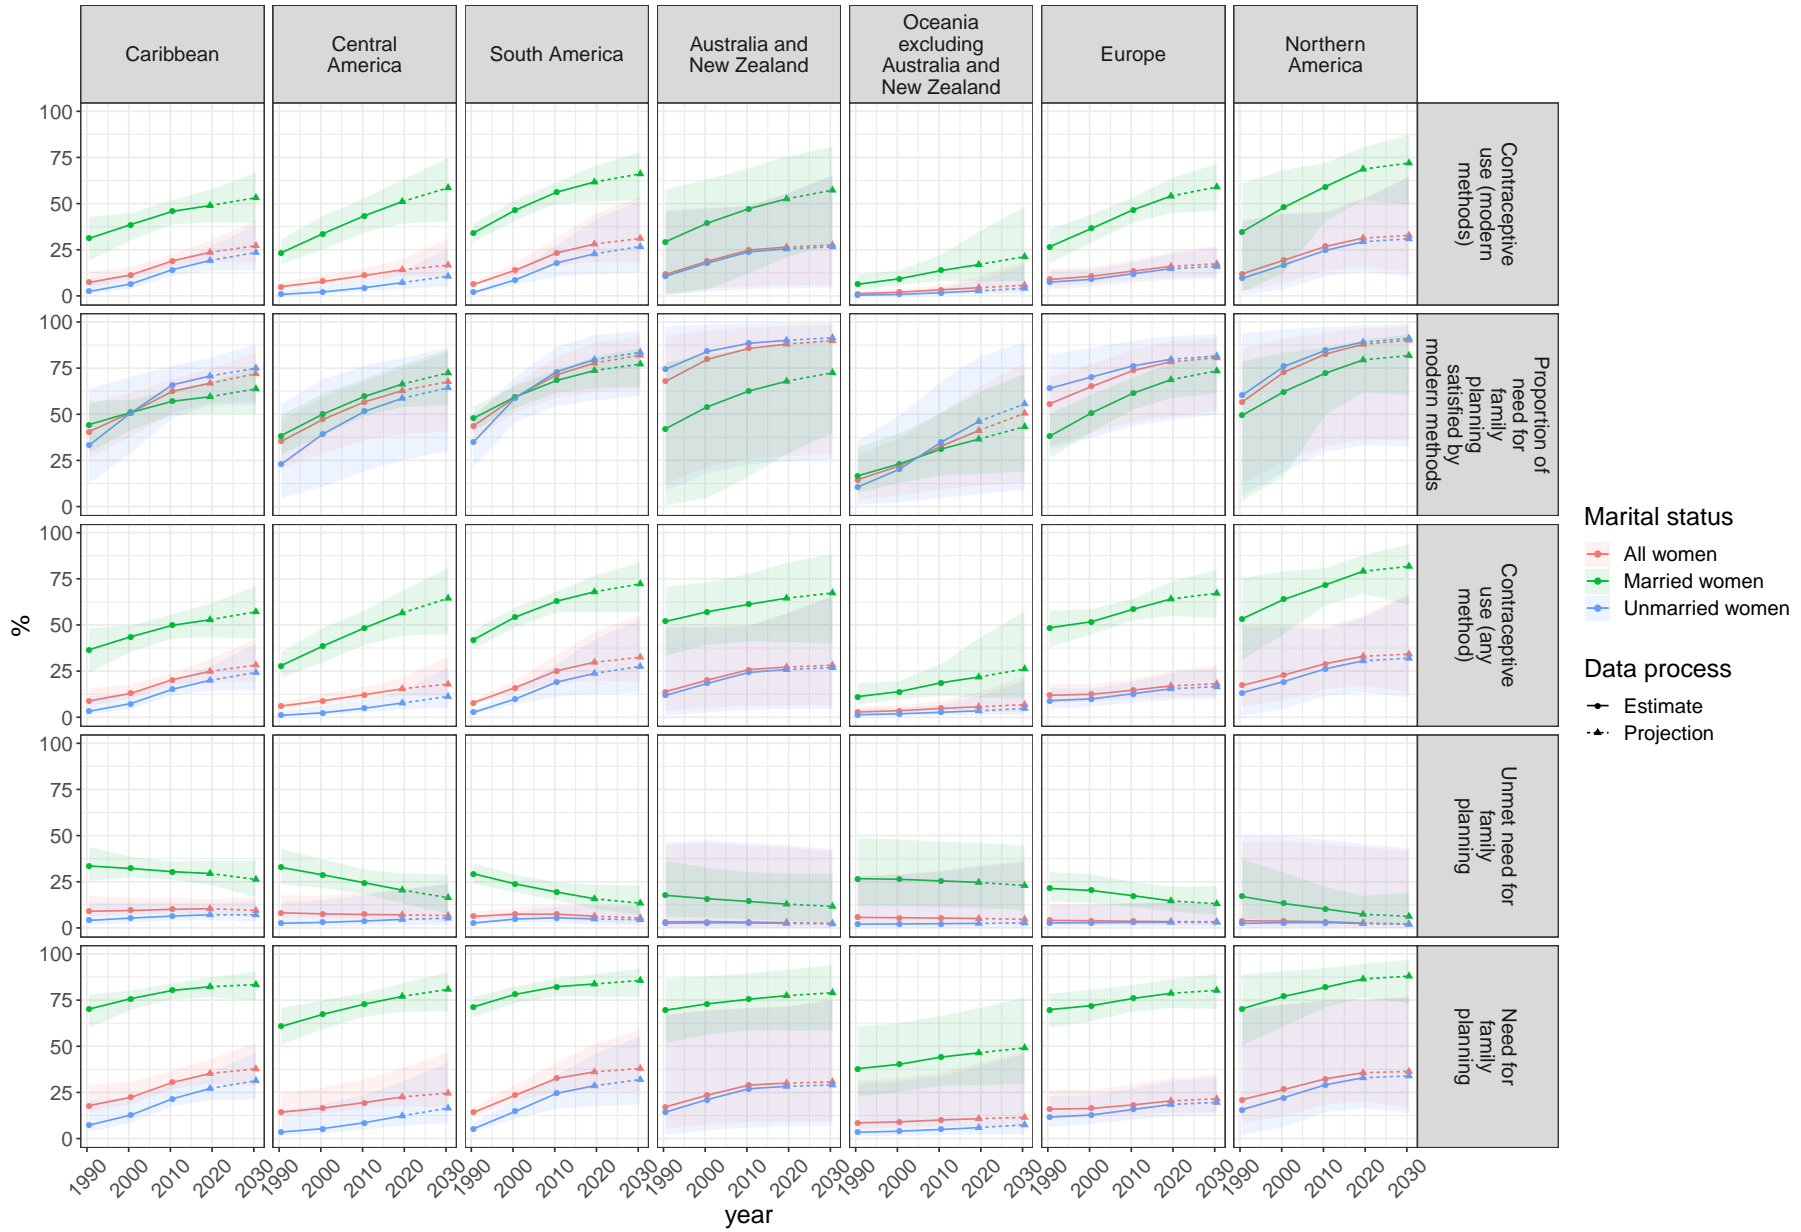

(ii)

Figure B. (cont'd).

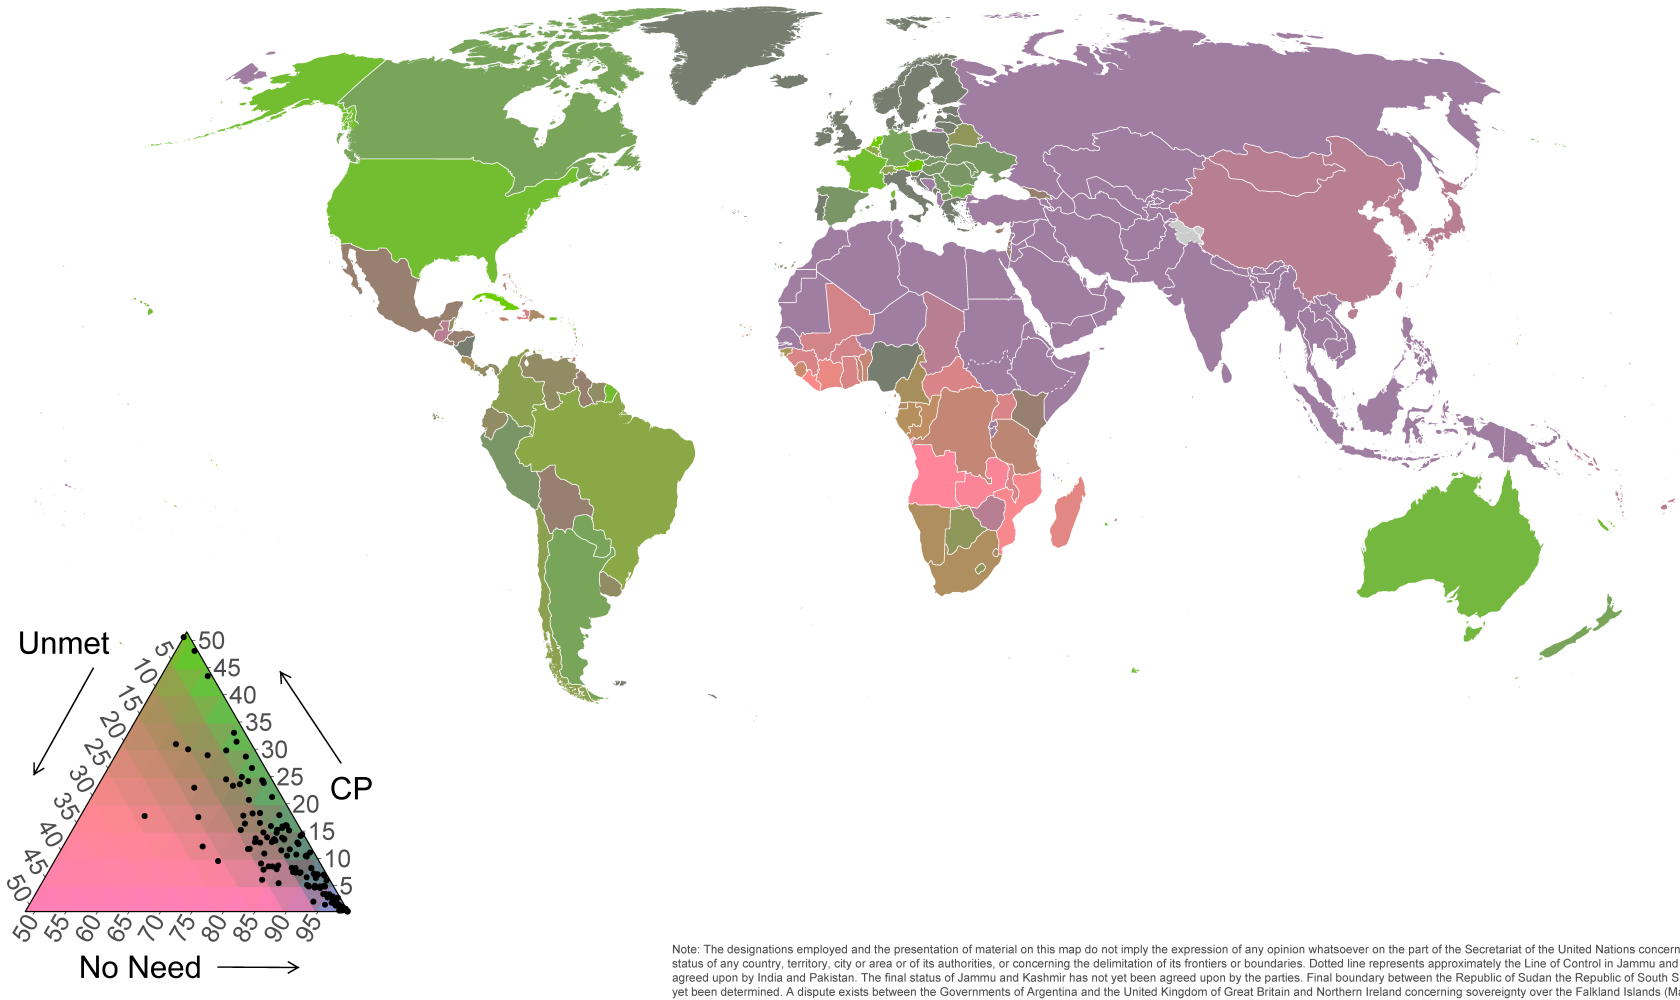

Note: The designations employed and the presentation of material on this map do not imply the expression of any opinion whatsoever on the part of the Secretariat of the United Nations concerning the legal status of any country, territory, city or area or of its authorities, or concerning the delimitation of its frontiers or boundaries. Dotted line represents approximately the Line of Control in Jammu and Kashmir agreed upon by India and Pakistan. The final status of Jammu and Kashmir has not yet been agreed upon by the parties. Final boundary between the Republic of Sudan and the Republic of South Sudan has not yet been determined. A dispute exists between the Governments of Argentina and the United Kingdom of Great Britain and Northern Ireland concerning sovereignty over the Falkland Islands (Malvinas).

**Figure C. Ternary colour scheme map for unmarried adolescent women aged 15–19, with centred colour scheme.** The map shows contraceptive use (any method), unmet need for family planning, and no need for family planning for unmarried women aged 15–19 years, 2019. The colour scheme is centred at the compositional mean so that relative differences among countries are highlighted. However, it also means that this map is not directly comparable with the other ternary colour scheme maps. Note that the legend has been cropped.

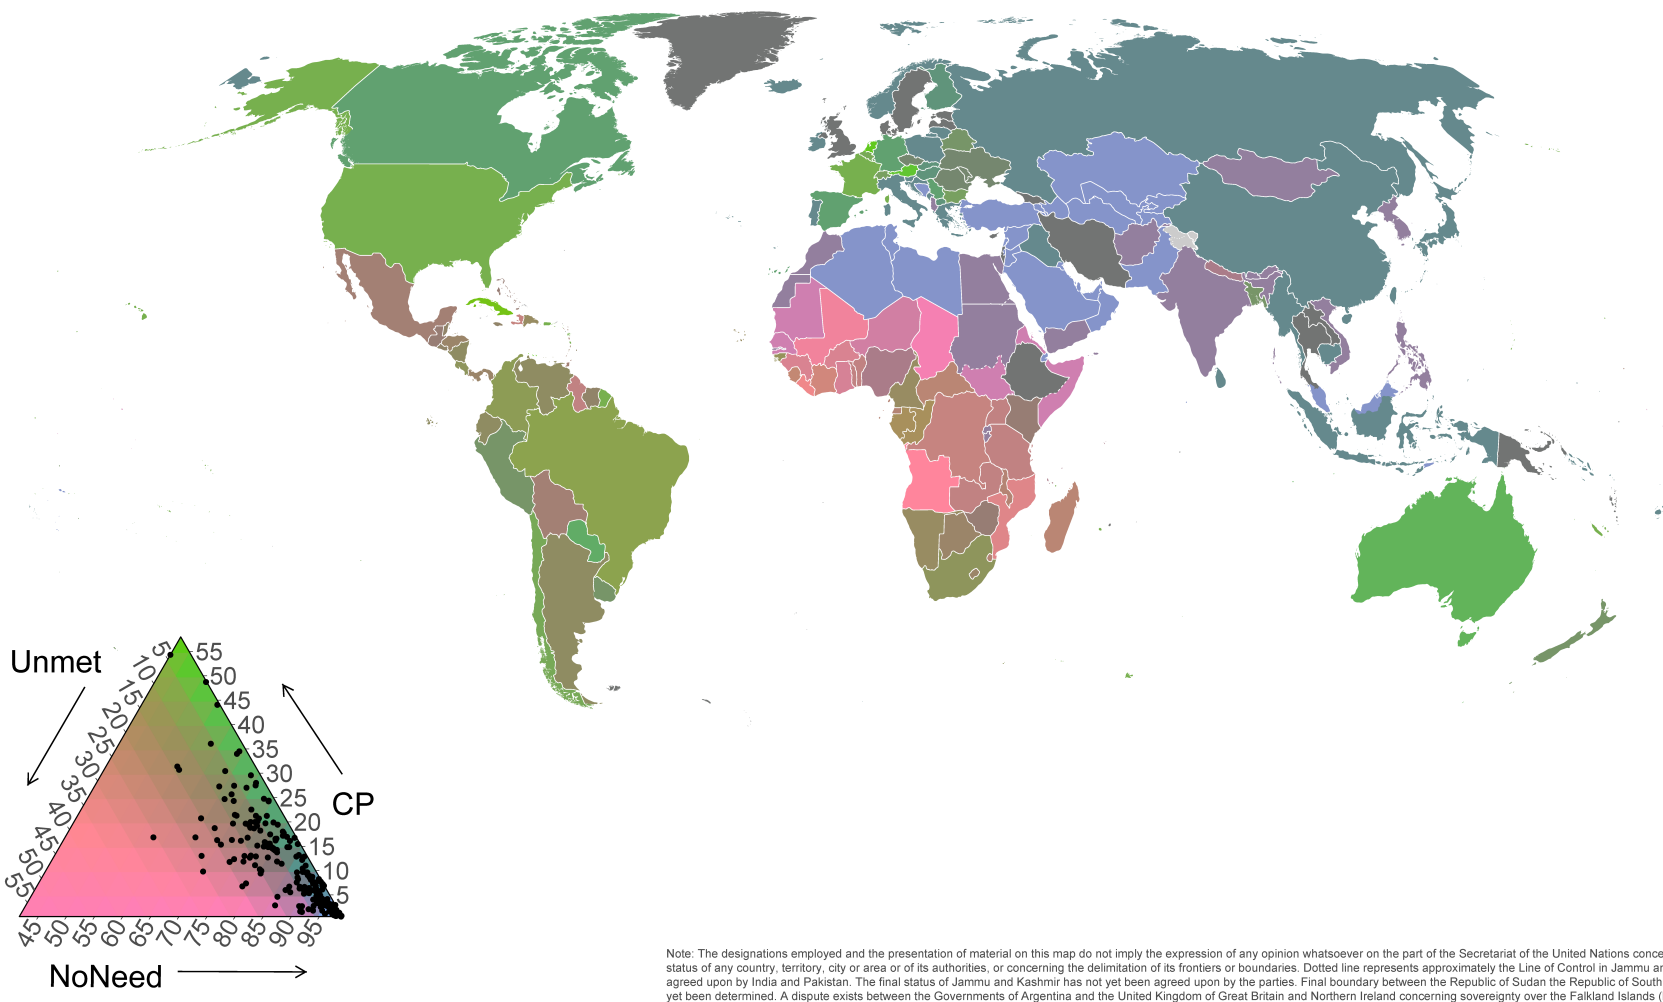

Note: The designations employed and the presentation of material on this map do not imply the expression of any opinion whatsoever on the part of the Secretariat of the United Nations concerning the legal status of any country, territory, city or area or of its authorities, or concerning the delimitation of its frontiers or boundaries. Dotted line represents approximately the Line of Control in Jammu and Kashmir agreed upon by India and Pakistan. The final status of Jammu and Kashmir has not yet been agreed upon by the parties. Final boundary between the Republic of Sudan and the Republic of South Sudan has not yet been determined. A dispute exists between the Governments of Argentina and the United Kingdom of Great Britain and Northern Ireland concerning sovereignty over the Falkland Islands (Malvinas).

**Figure D. Ternary colour scheme map for all adolescent women aged 15–19, with centred colour scheme.** The map shows contraceptive use (any method), unmet need for family planning, and no need for family planning for unmarried women aged 15–19 years, 2019. The colour scheme is centred at the compositional mean so that relative differences among countries are highlighted. However, it also means that this map is not directly comparable with the other ternary colour scheme maps. Note that the legend has been cropped.

## 4 Country-Specific Estimates and Projections of Family-Planning Indicators

These figures contain a systematic and comprehensive set of annual, model-based estimates and projections, and underlying survey-based observations, for a collection of family planning indicators, including contraceptive prevalence, the unmet need for family planning, and the demand for family planning satisfied by use of contraception (any method or modern methods alone). They pertain to the population of adolescent women aged 15–19 years.

The results pertain to adolescent women aged 15–19 years who are unmarried and not in a union ('unmarried'), married or in a union ('married'), and all adolescent women aged 15–19. They cover the period from 1970 to 2030. Estimates based on medians, as well as 80 per cent uncertainty intervals (represented by lines) and 95 per cent uncertainty intervals (represented by shaded areas), are provided for 185 countries or areas. The results are based on data available as of February 2019.

*Note:* The designations employed and the material presented in this publication do not imply the expression of any opinion whatsoever on the part of the Secretariat of the United Nations concerning the legal status of any country, territory or area or of its authorities, or concerning the delimitation of its frontiers or boundaries. The term "country" as used in this publication also refers, as appropriate, to territories or areas. Countries or areas listed individually are only those with 90,000 inhabitants or more in 2017 and ; the rest are included in the aggregates but are not listed separately.

### 4.1 Unmarried Adolescent Women

Albania (Southern Europe, SA Group 1) --- Unmarried / Not In-Union

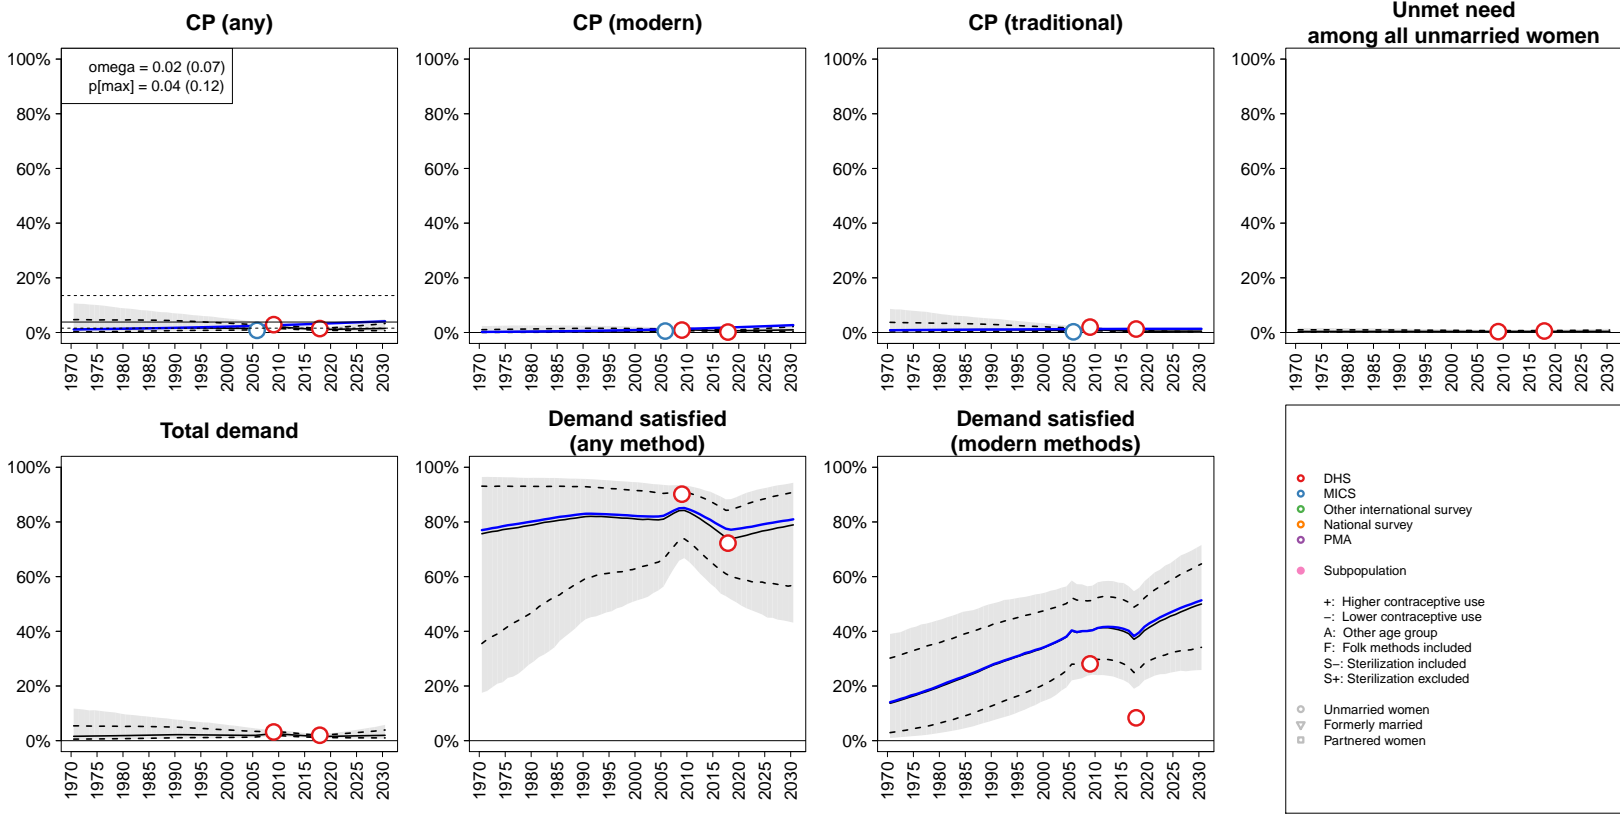

Angola (Middle Africa, SA Group 1) --- Unmarried / Not In-Union

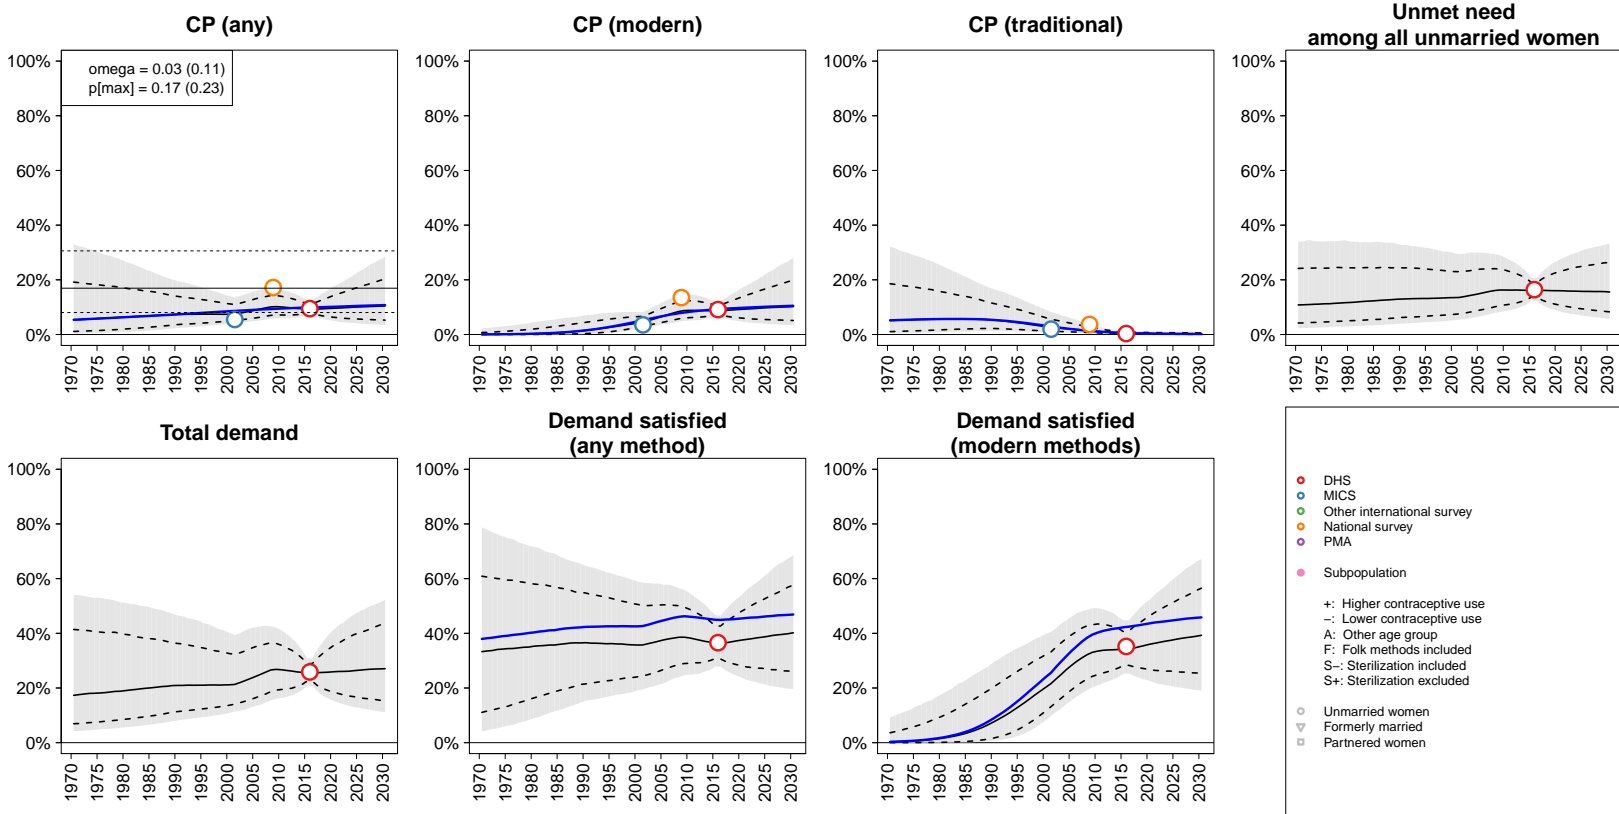

Armenia (Western Asia, SA Group 0) --- Unmarried / Not In-Union

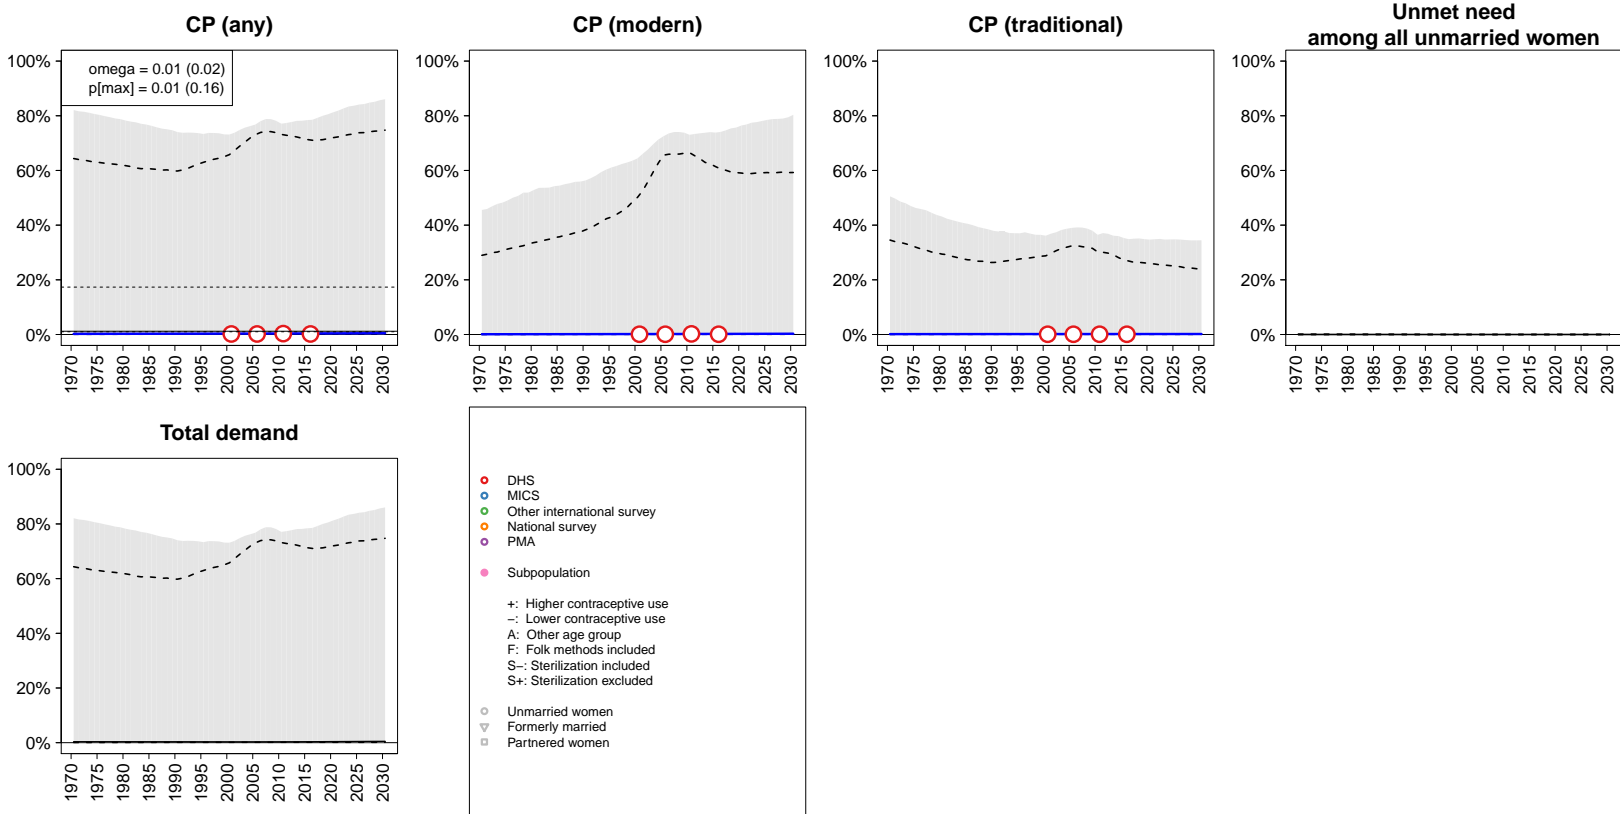



Barbados (Caribbean, SA Group 1) --- Unmarried / Not In-Union

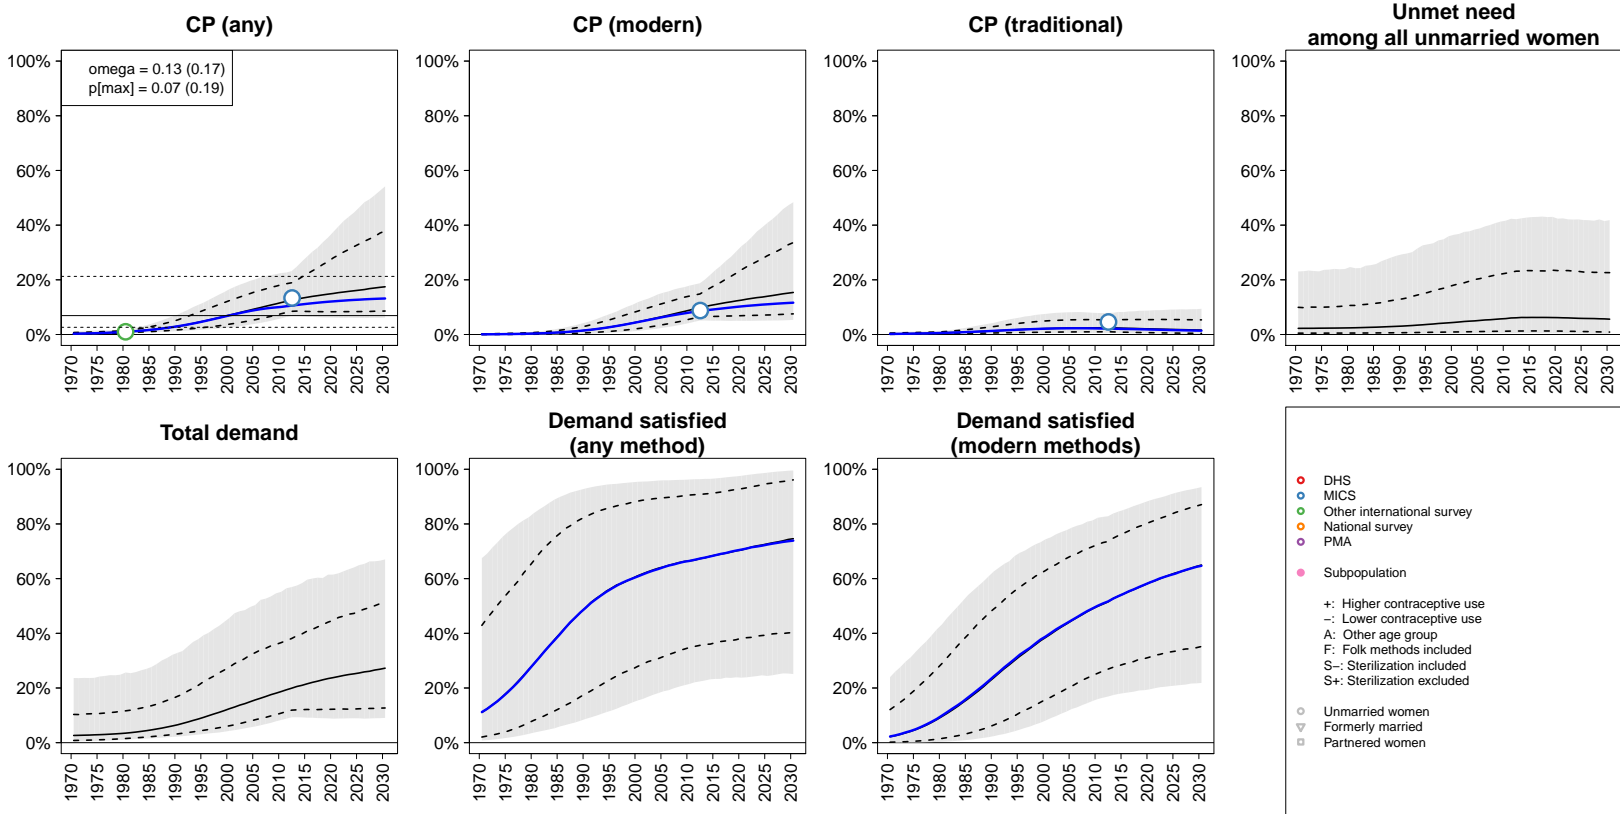

Belarus (Eastern Europe, SA Group 1) ---- Unmarried / Not In-Union

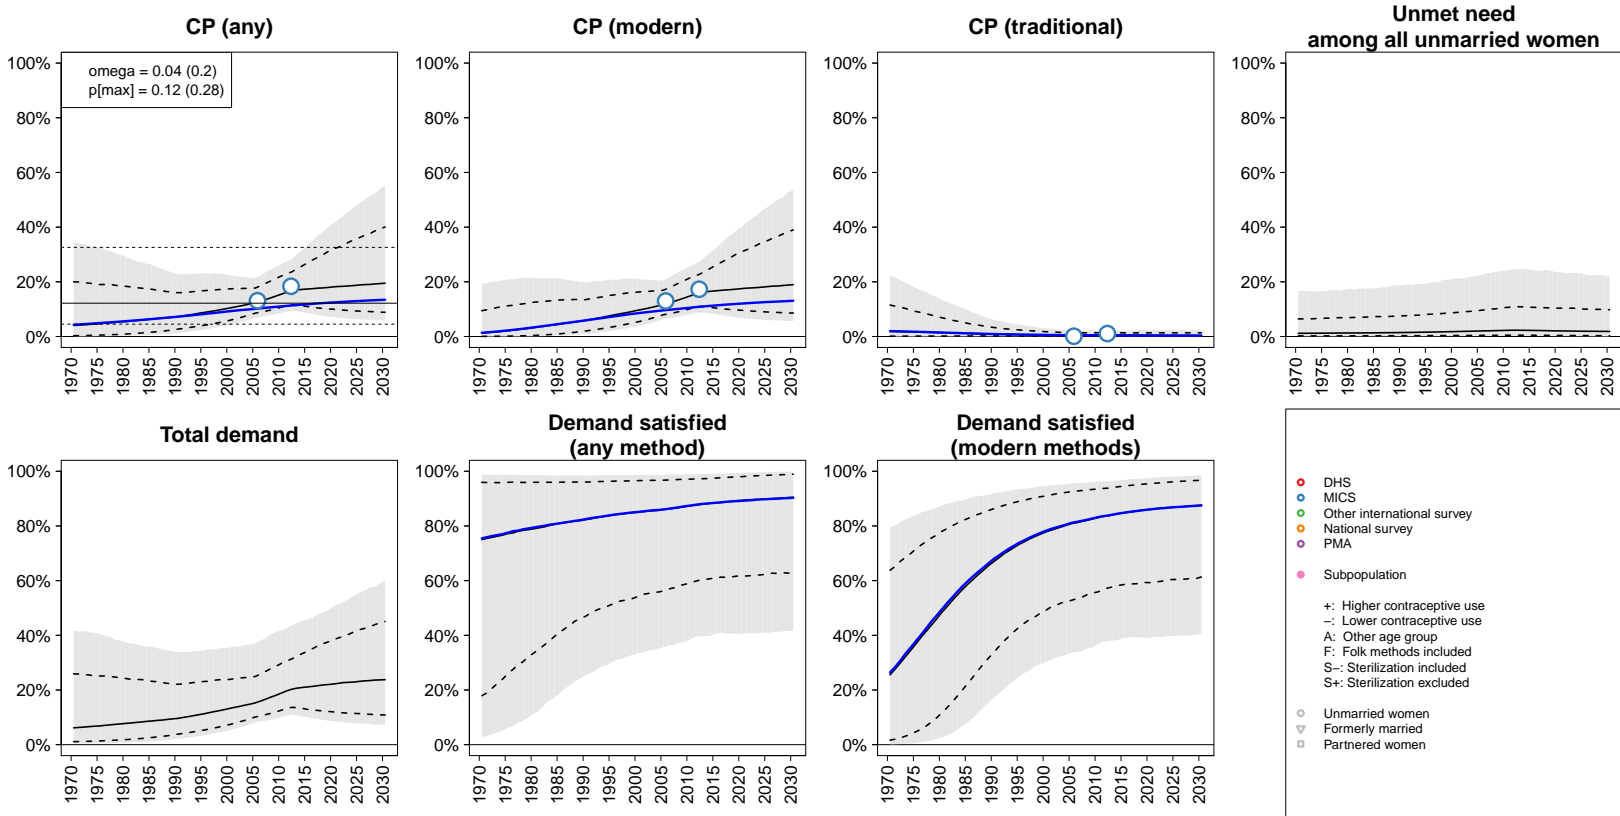

Benin (Western Africa, SA Group 1) --- Unmarried / Not In-Union

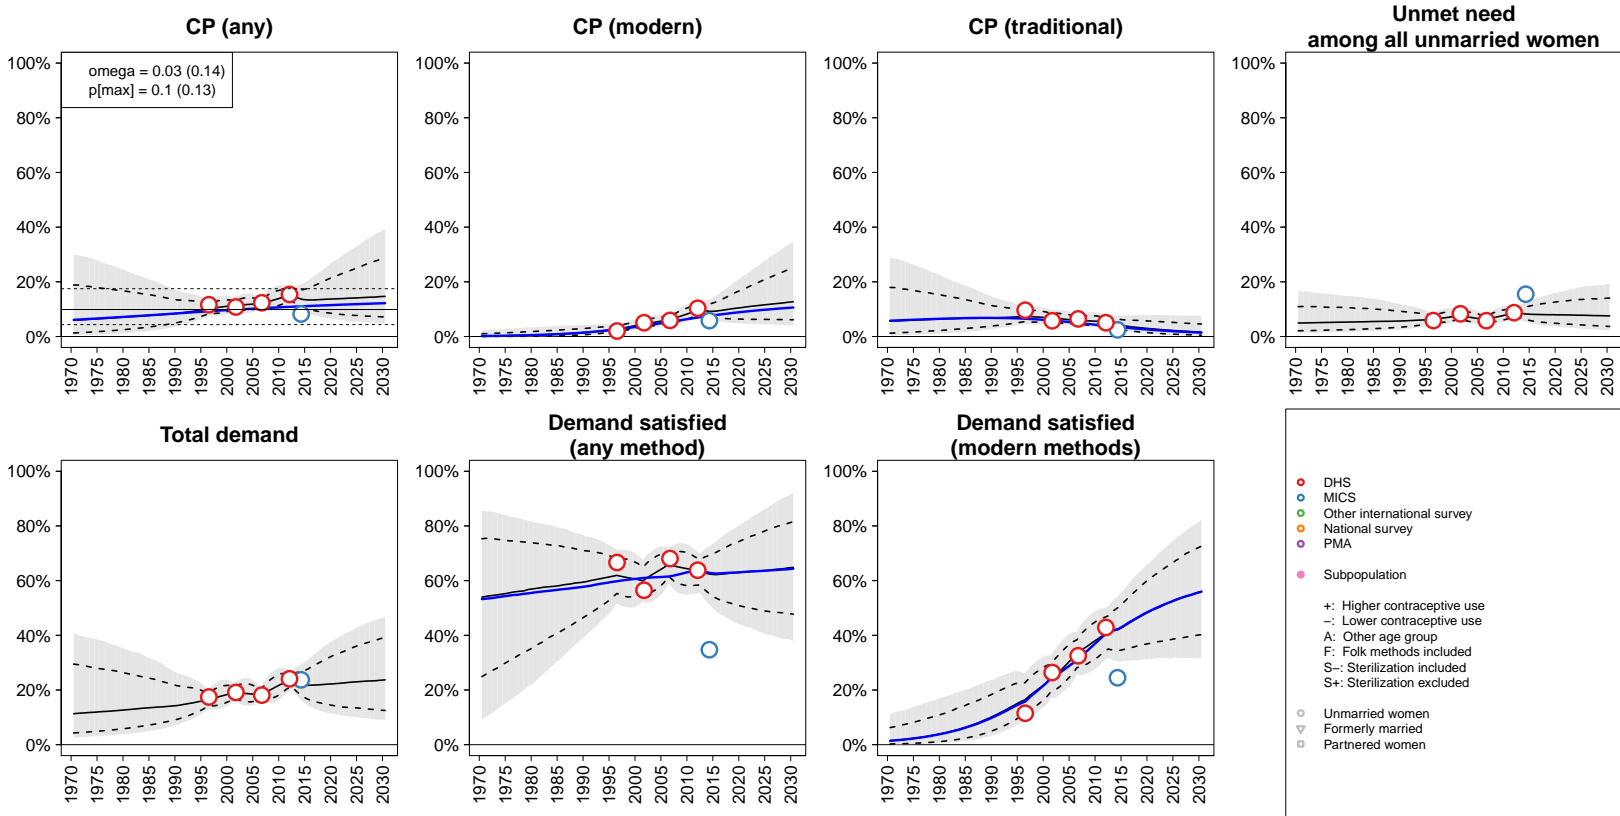

Bolivia, Plurinational State of (South America, SA Group 1) --- Unmarried / Not In-Union

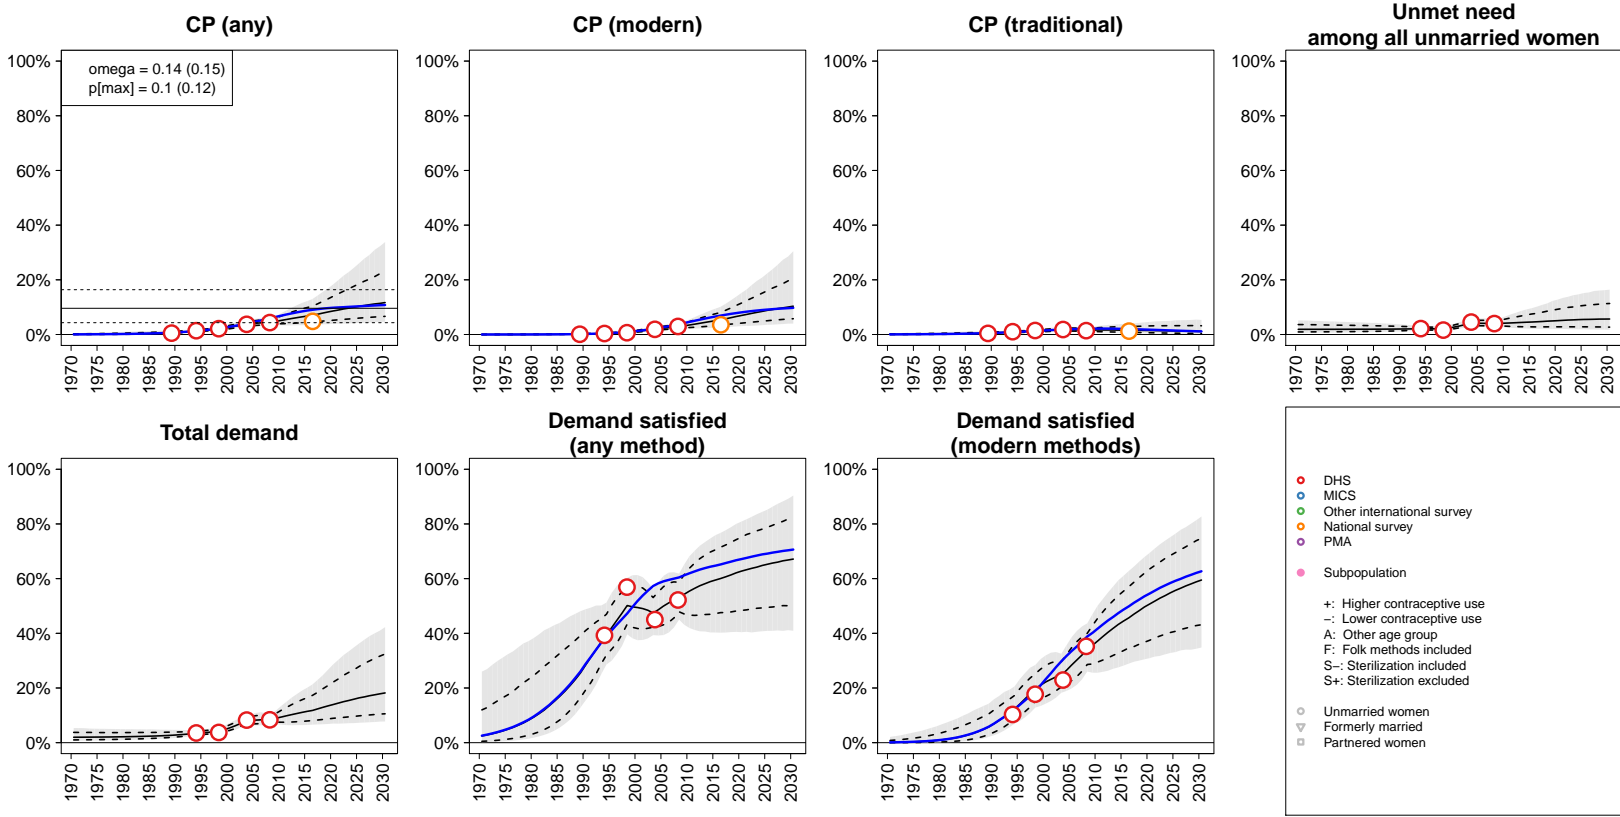

Bosnia and Herzegovina (Southern Europe, SA Group 1) --- Unmarried / Not In-Union

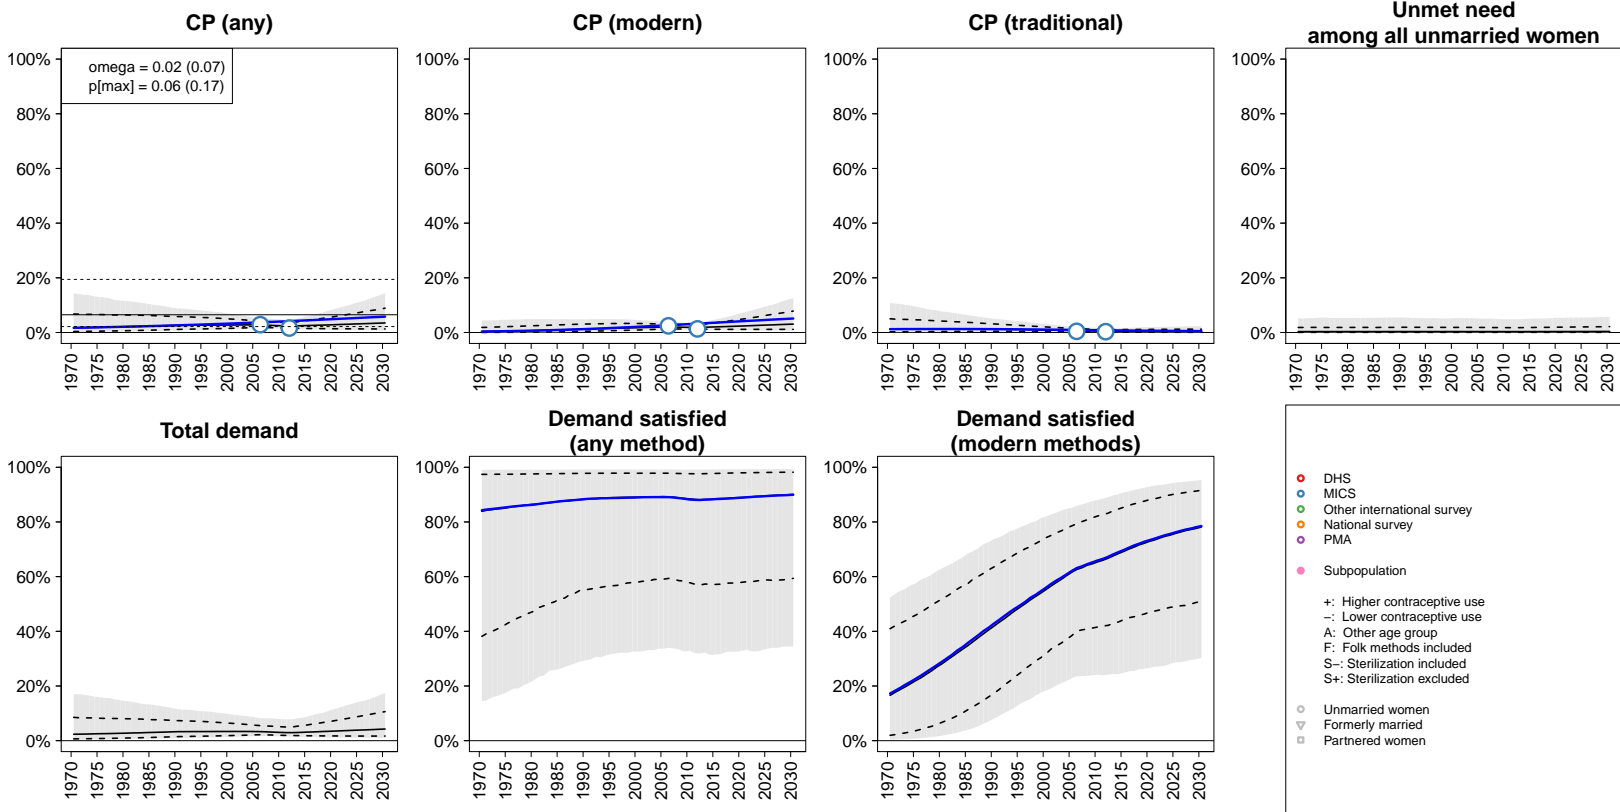

Brazil (South America, SA Group 1) --- Unmarried / Not In-Union

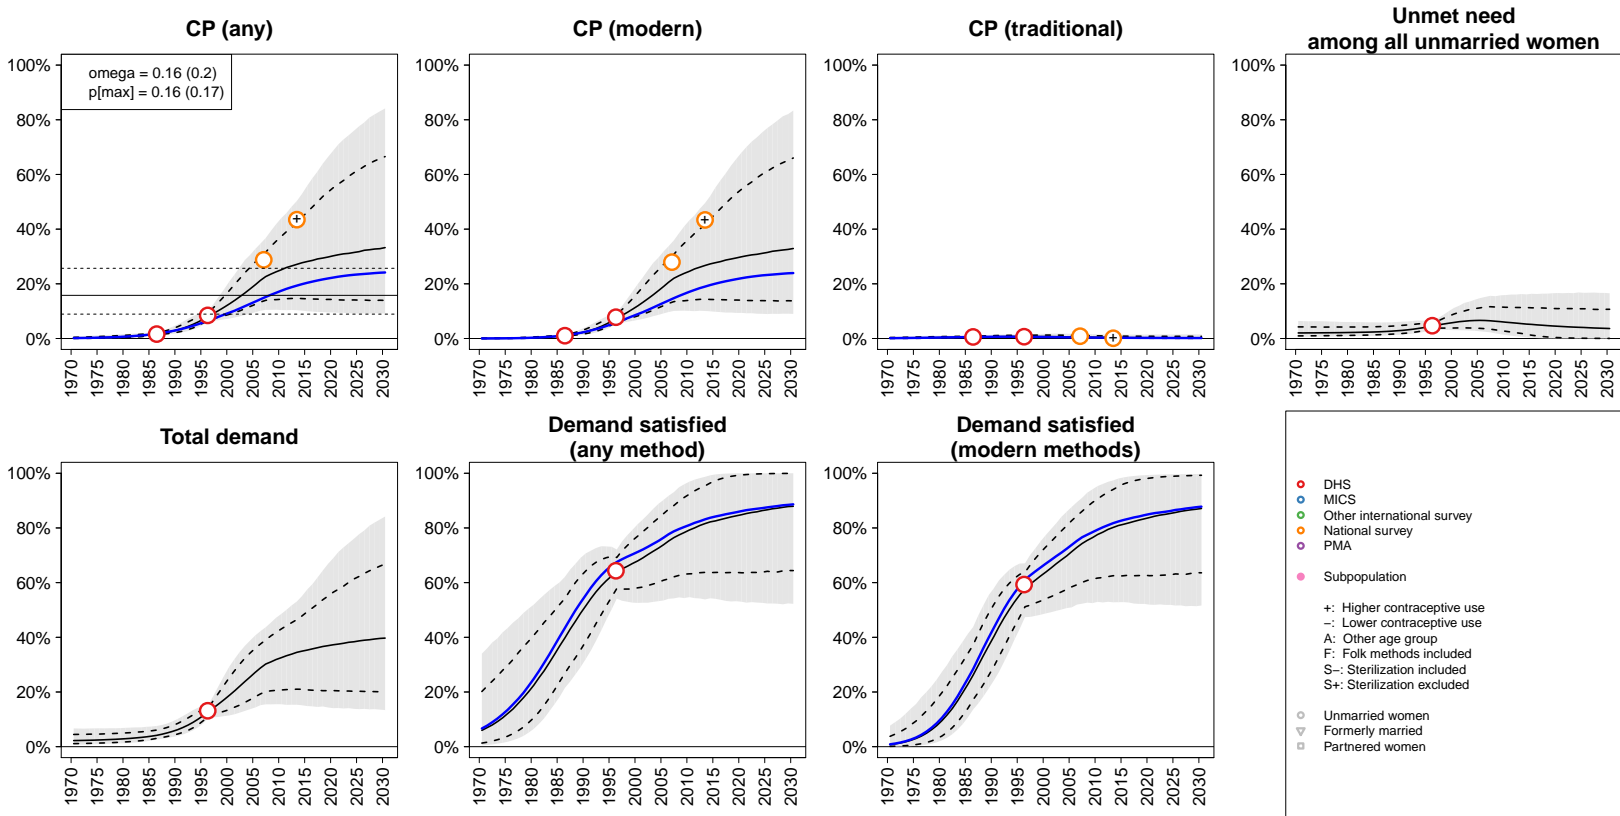

Burkina Faso (Western Africa, SA Group 1) --- Unmarried / Not In-Union

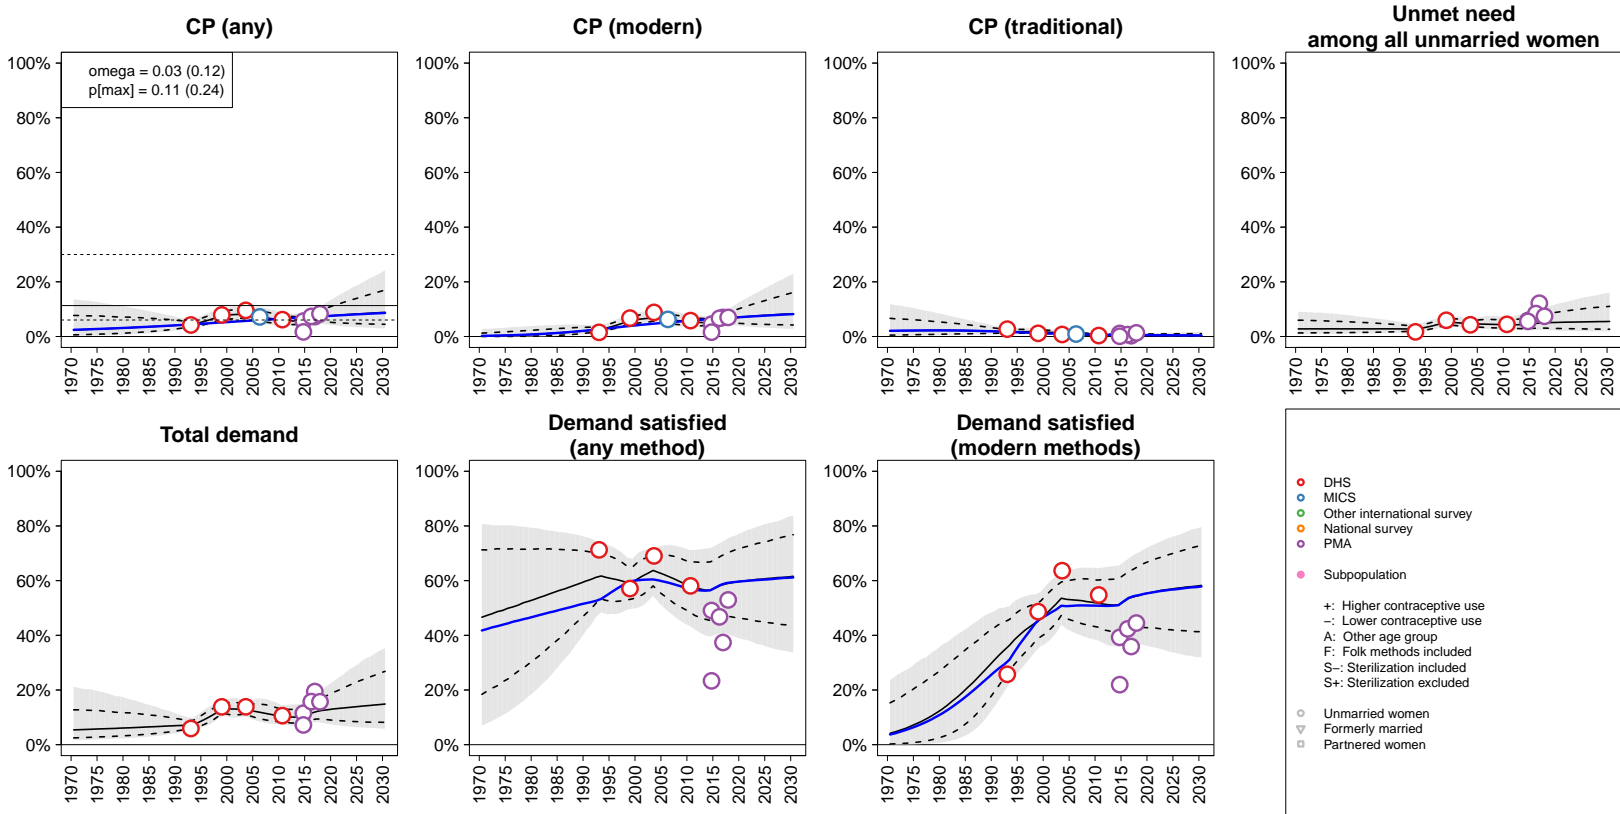

Burundi (Eastern Africa, SA Group 1) --- Unmarried / Not In-Union

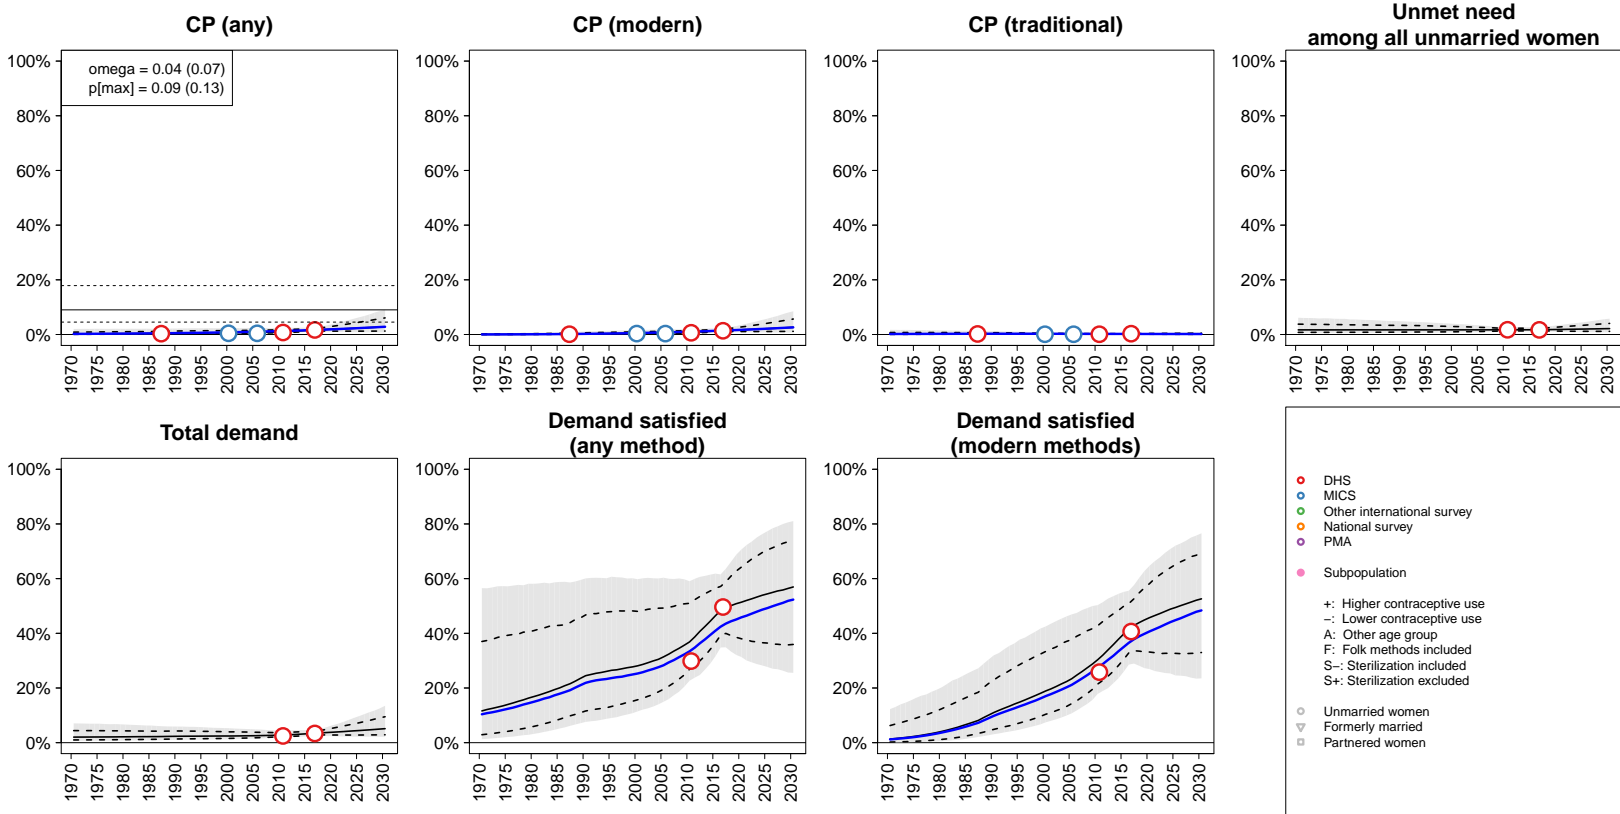



Cabo Verde (Western Africa, SA Group 1) ---- Unmarried / Not In-Union

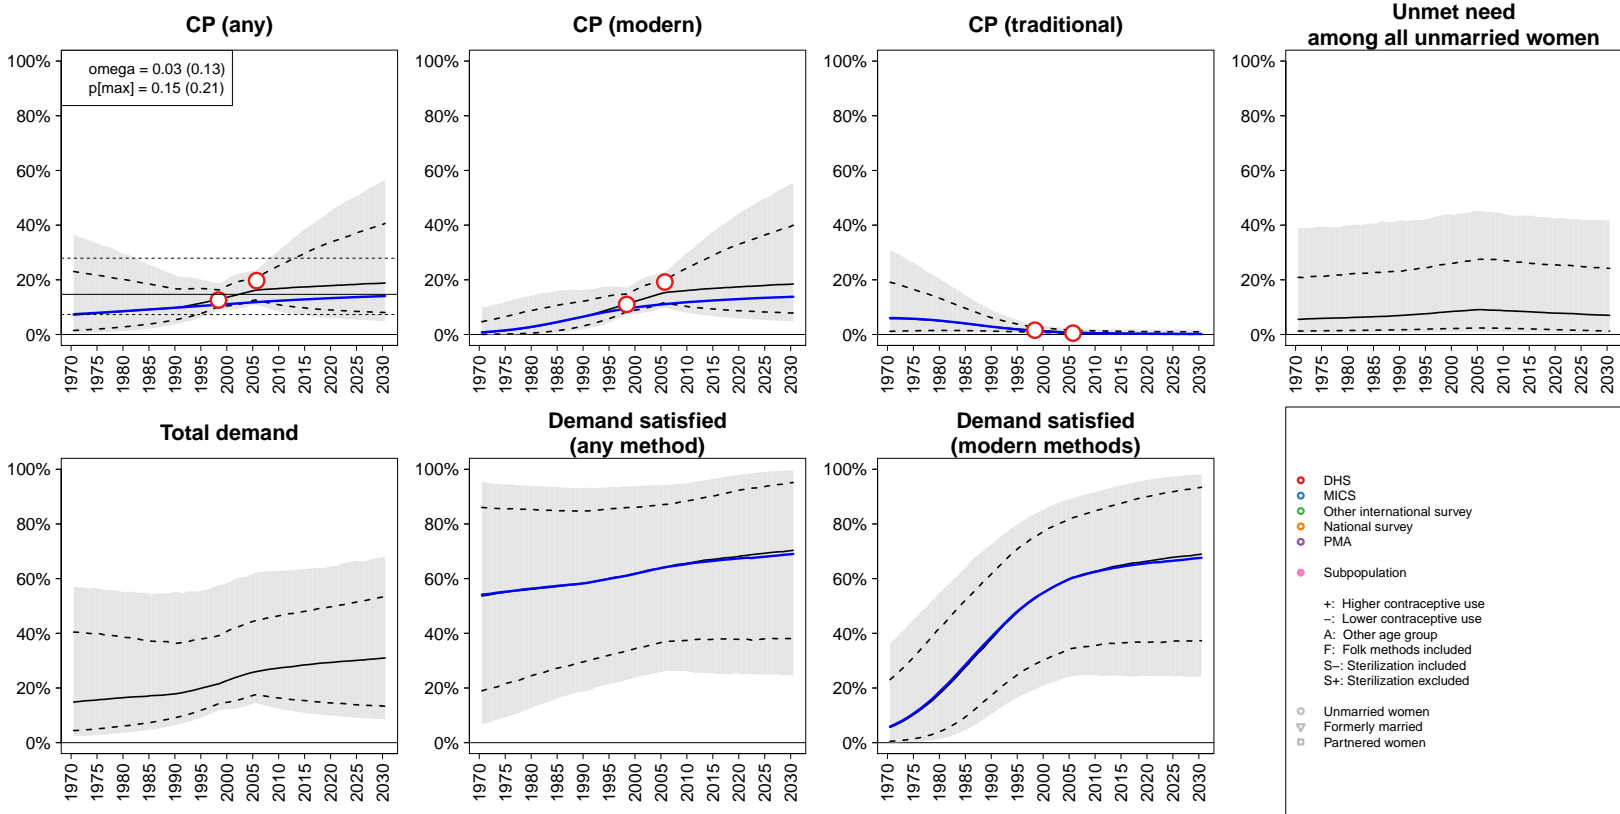

Cambodia (South-eastern Asia, SA Group 0) --- Unmarried / Not In-Union

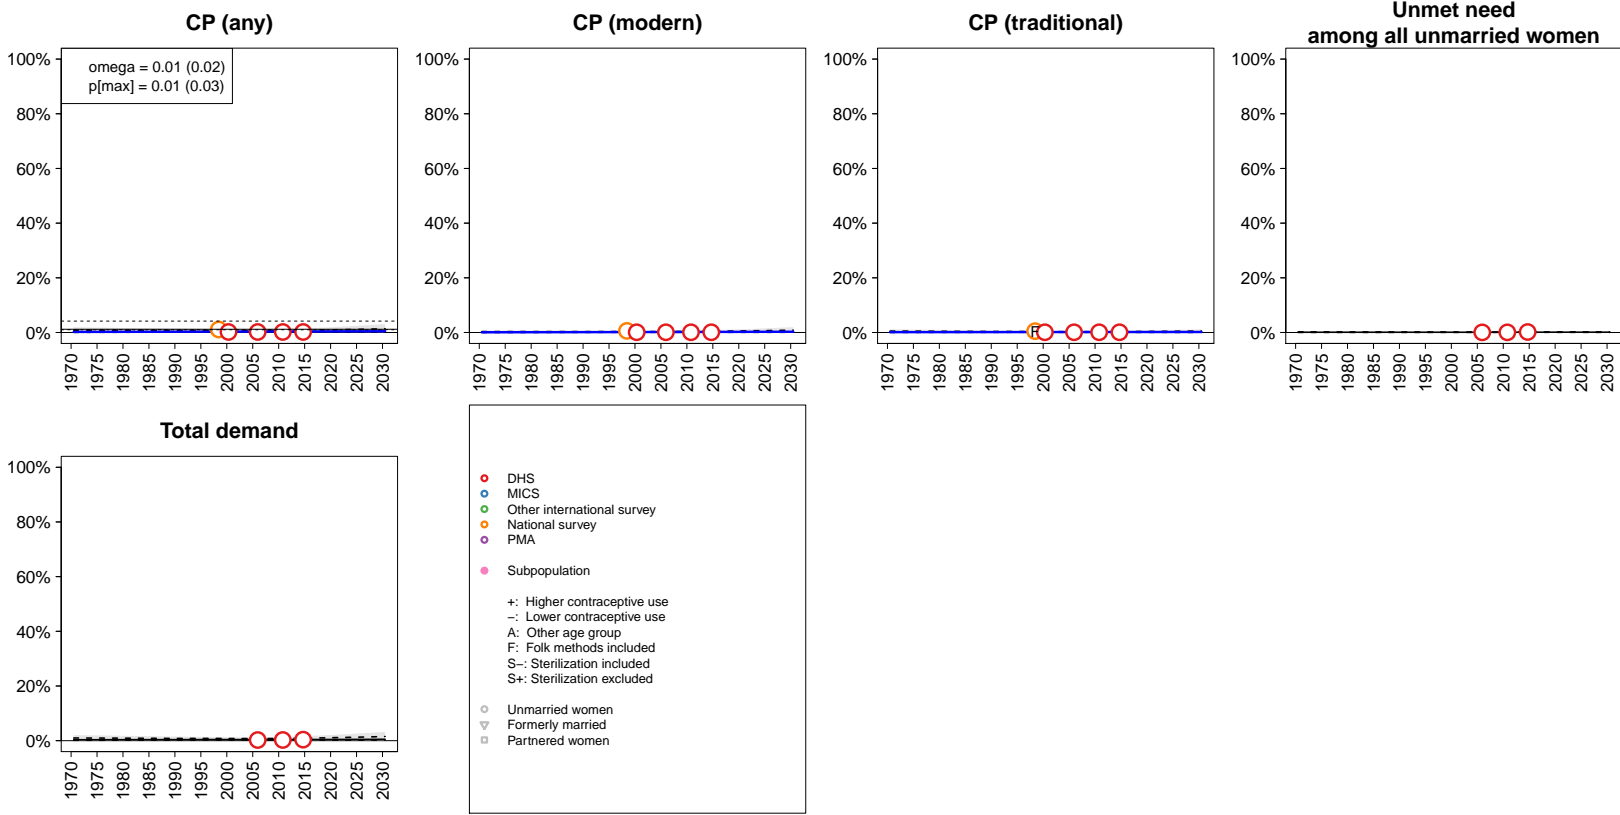

Cameroon (Middle Africa, SA Group 1) --- Unmarried / Not In-Union

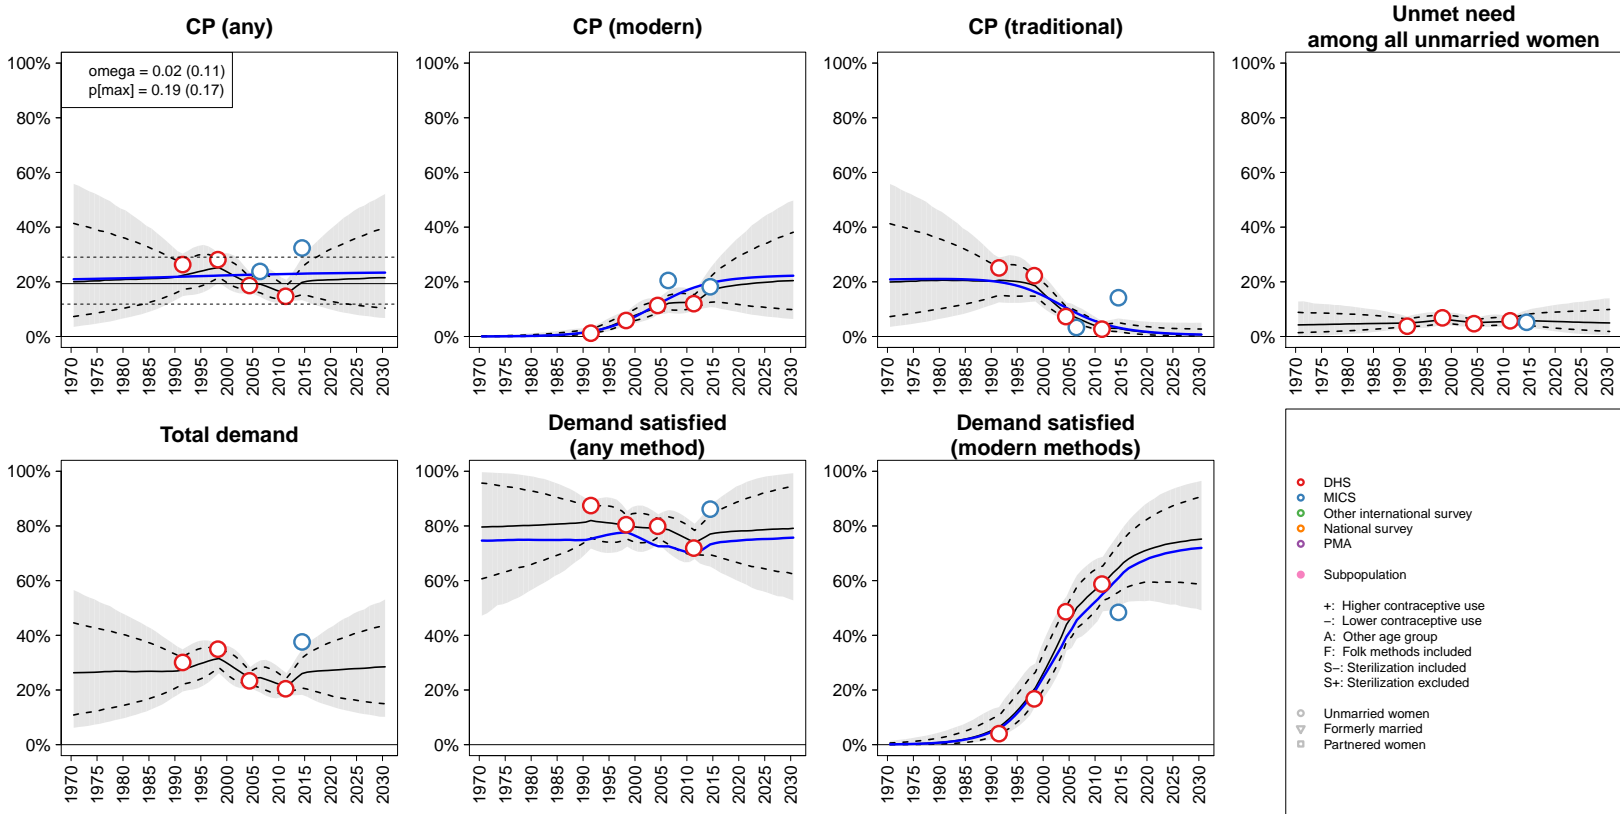

Central African Republic (Middle Africa, SA Group 1) --- Unmarried / Not In-Union

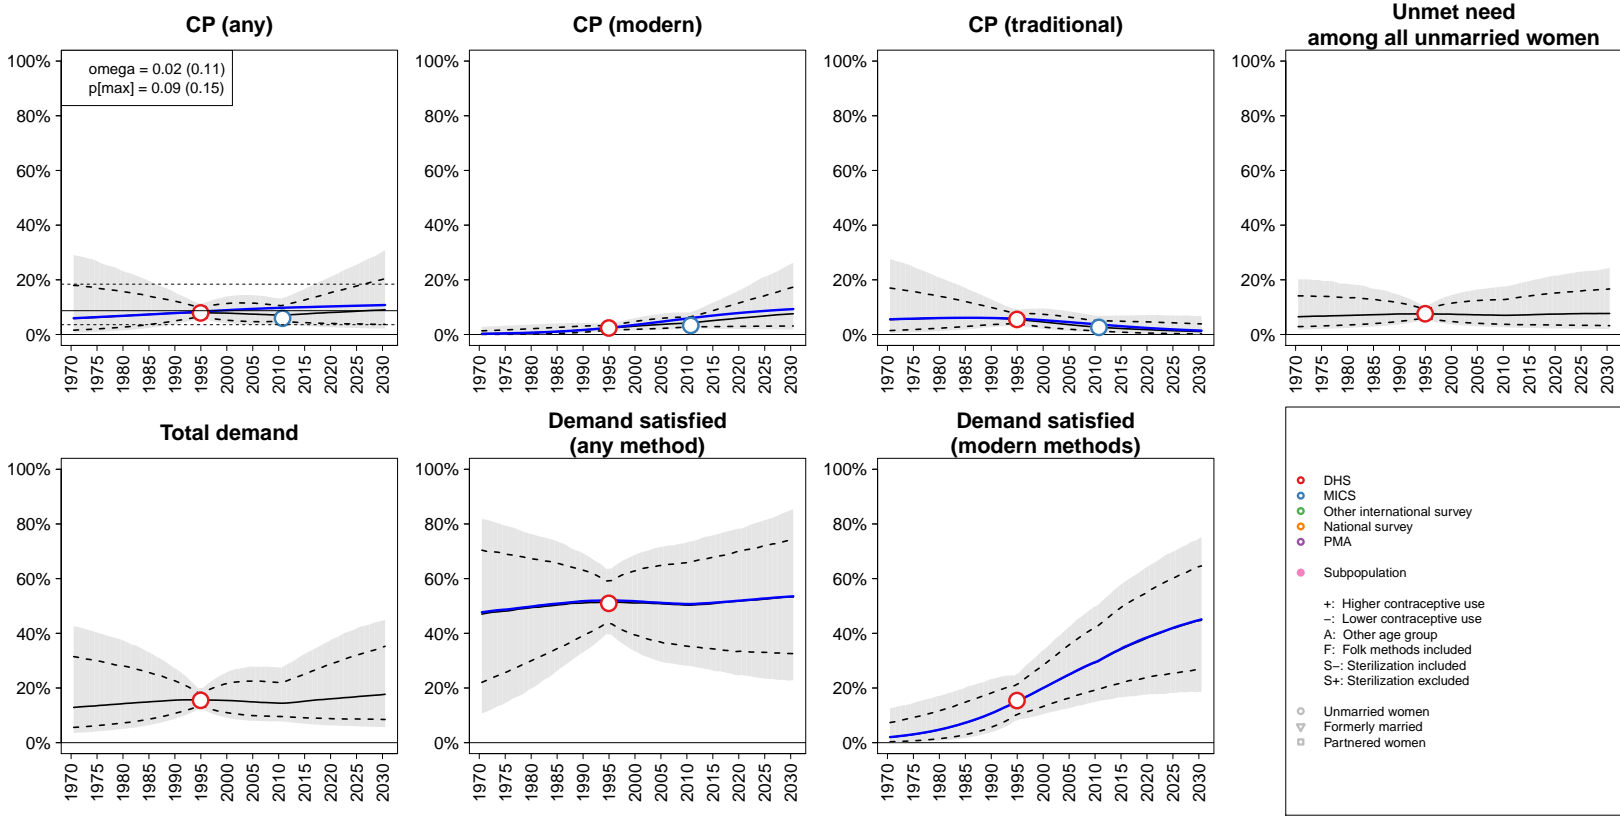

Chad (Middle Africa, SA Group 1) --- Unmarried / Not In-Union

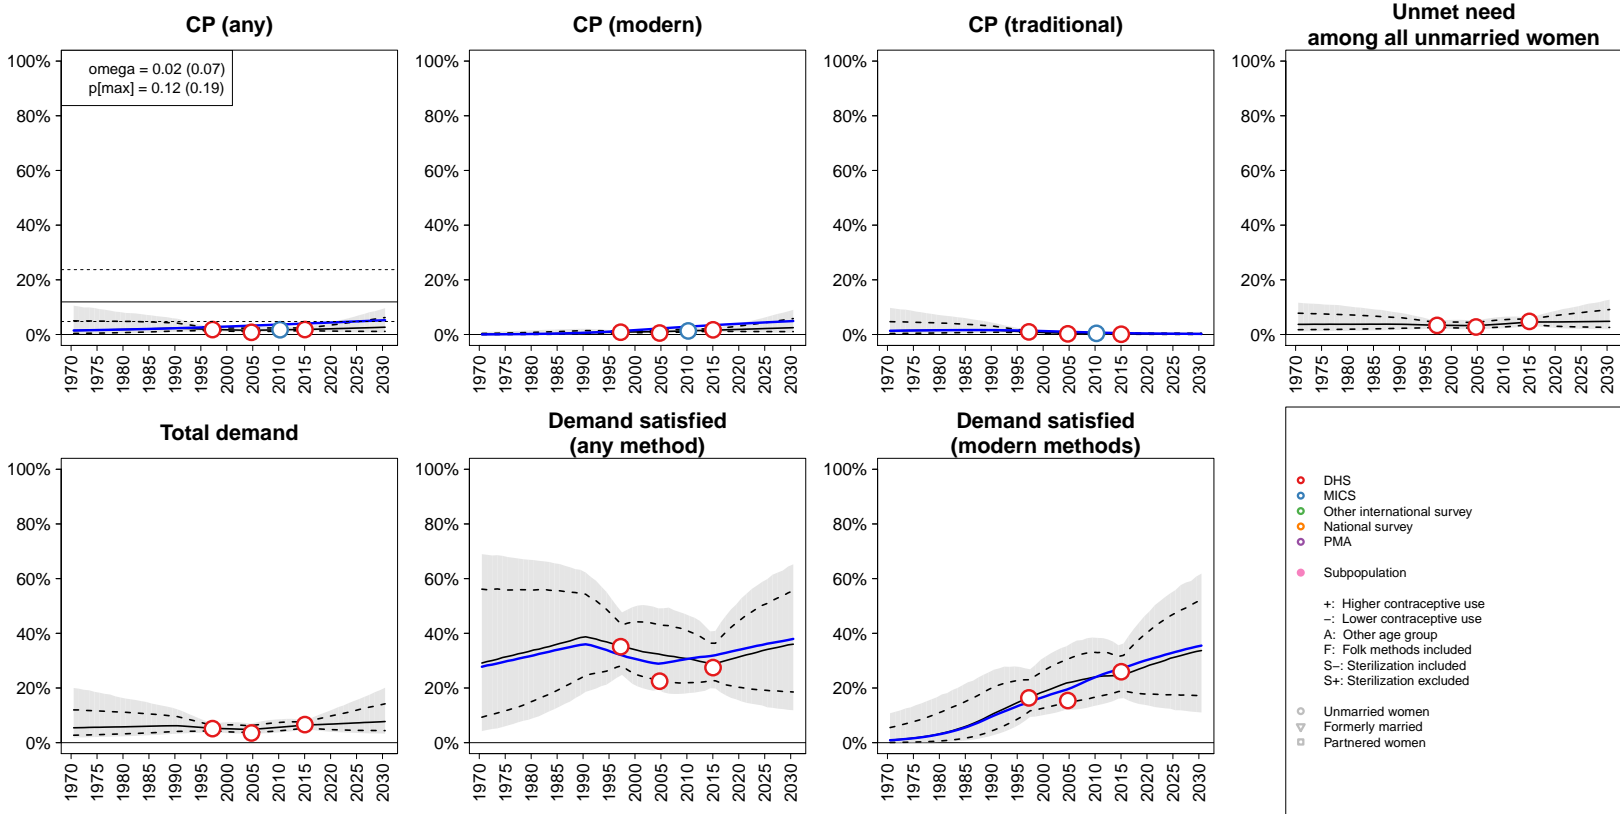

Colombia (South America, SA Group 1) — Unmarried / Not In-Union

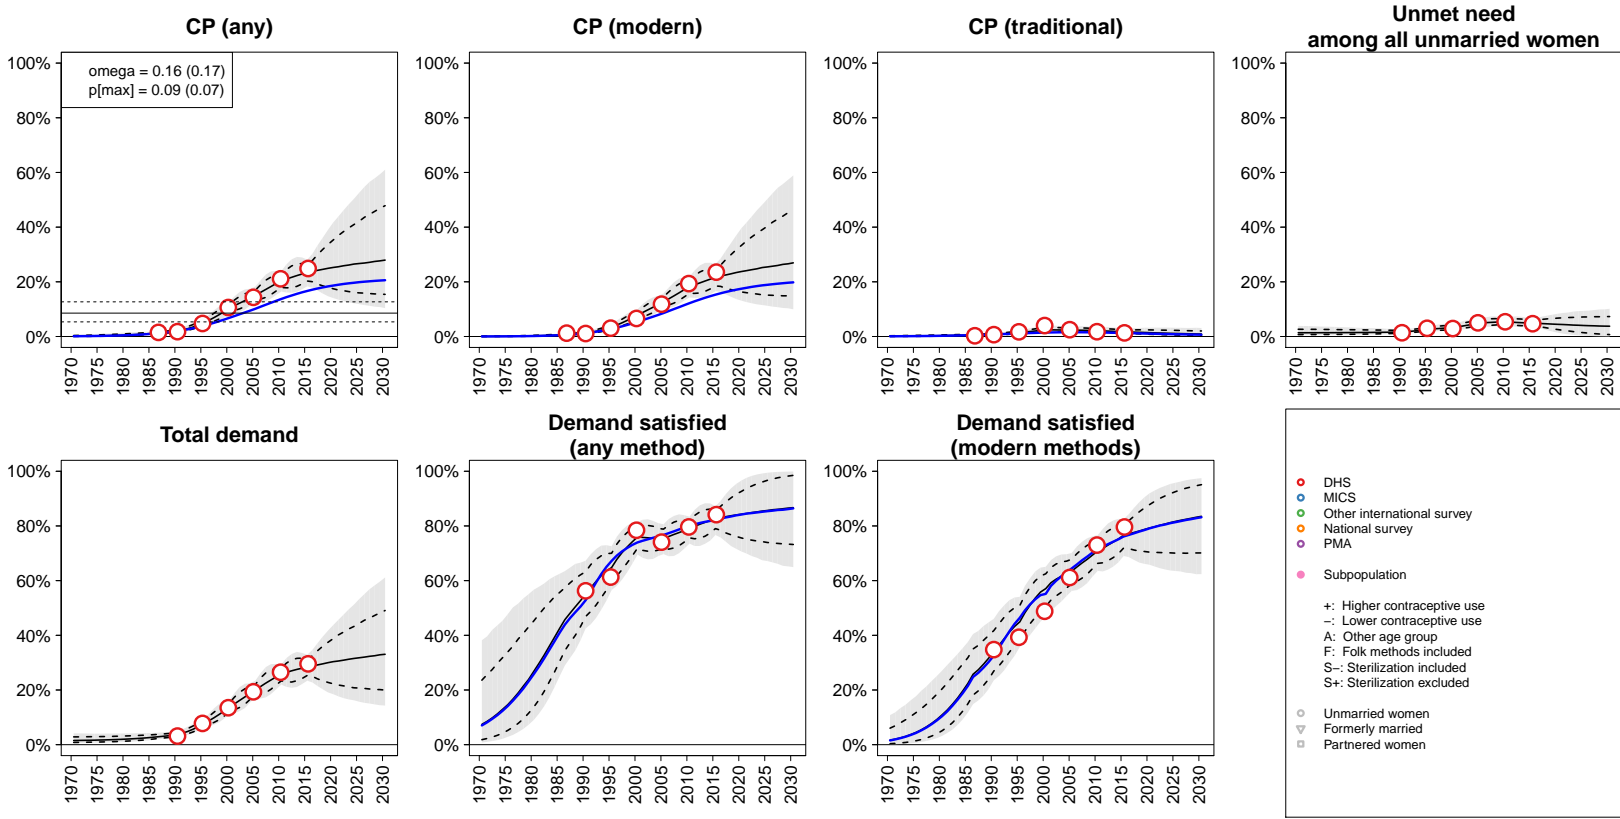

Comoros (Eastern Africa, SA Group 1) ---- Unmarried / Not In-Union

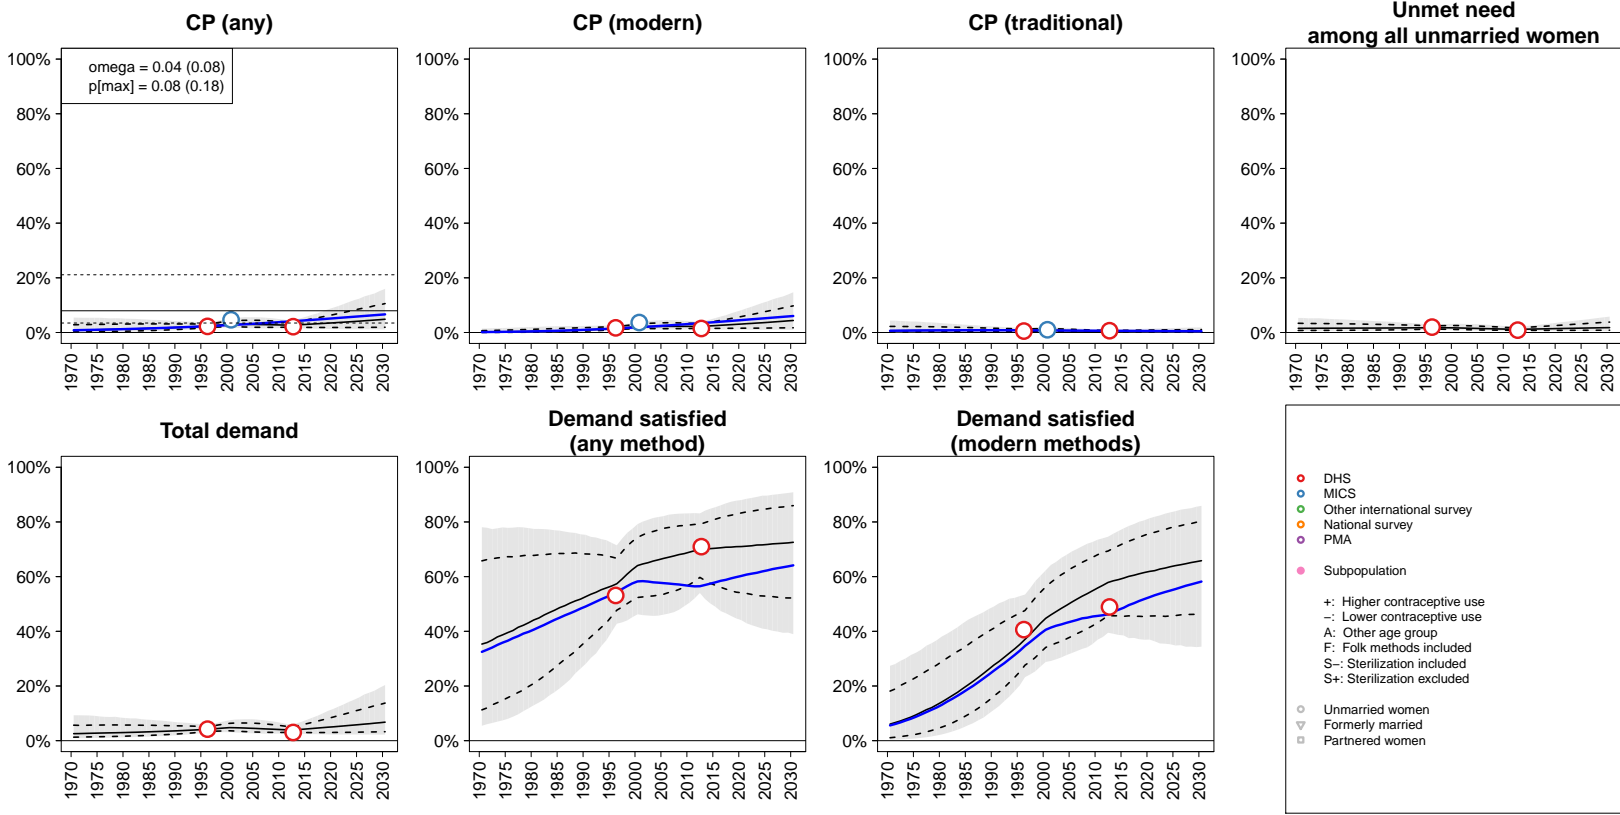

Congo (Middle Africa, SA Group 1) --- Unmarried / Not In-Union

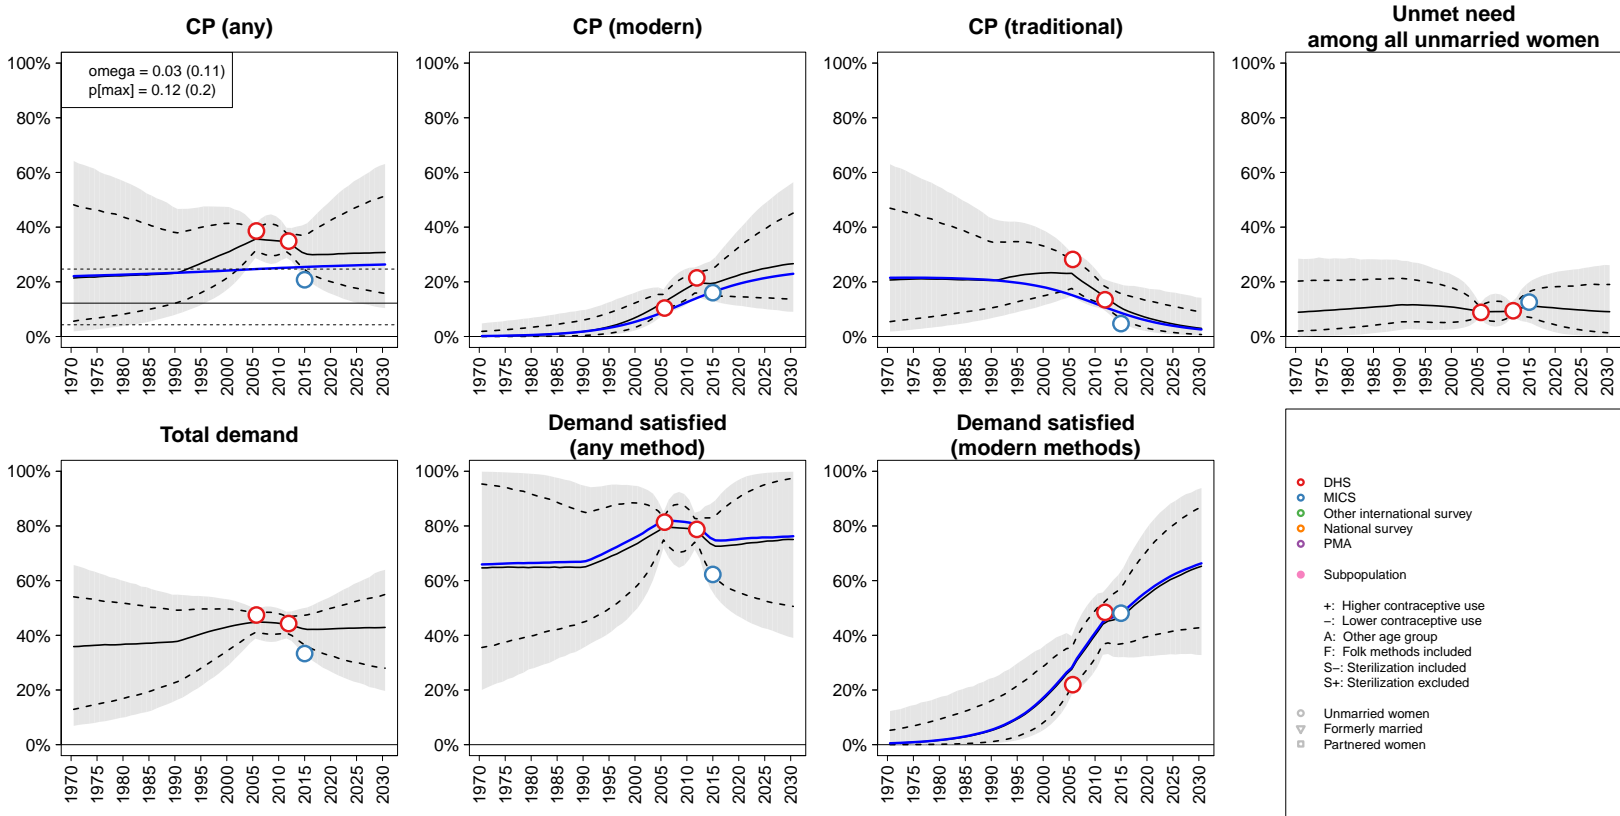



Costa Rica (Central America, SA Group 1) --- Unmarried / Not In-Union

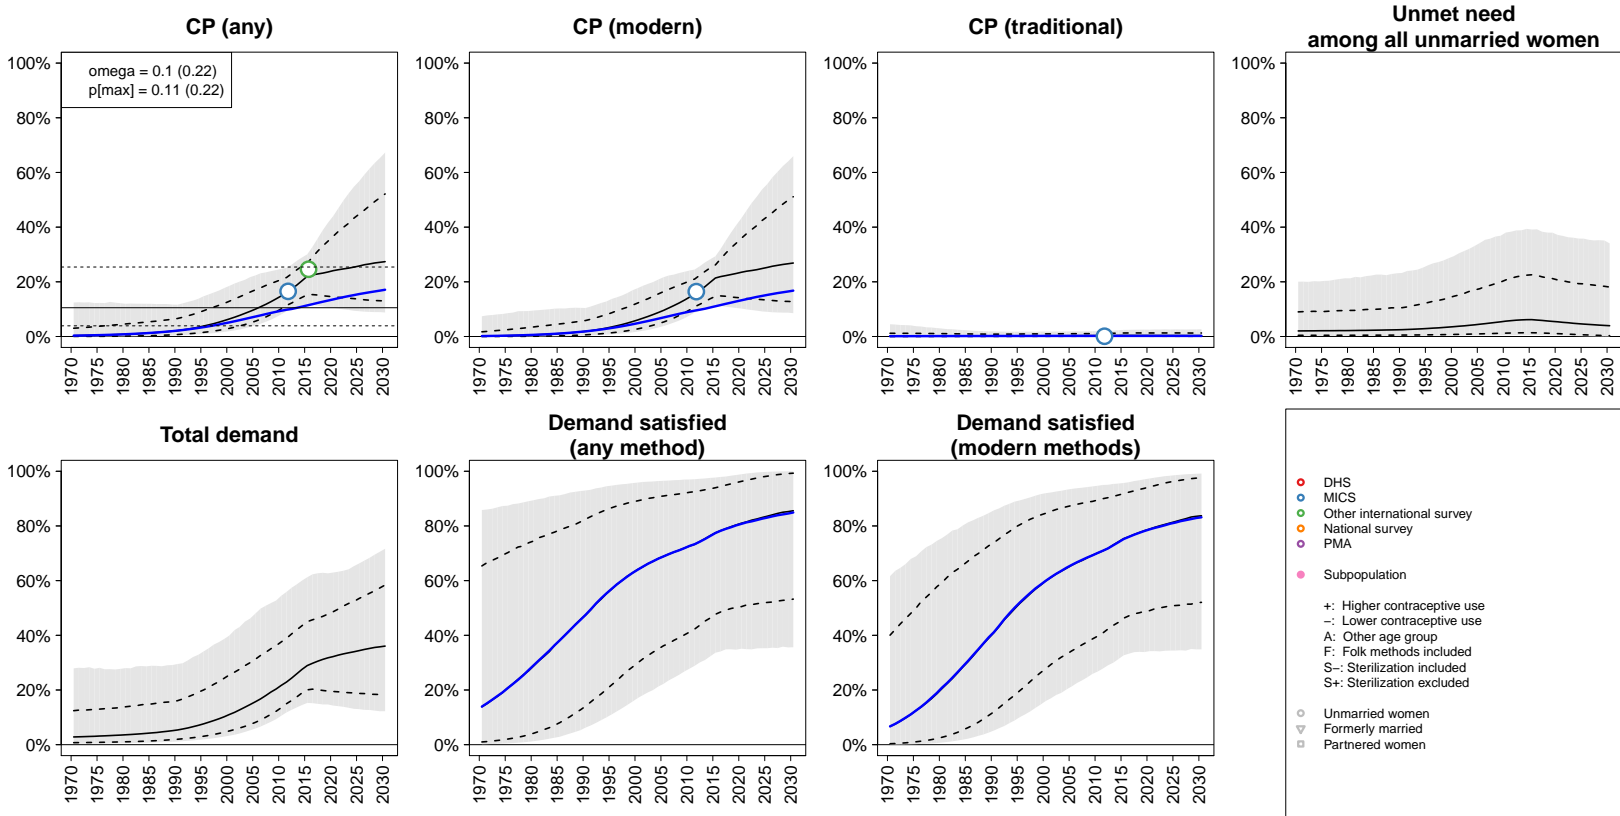

Côte d'Ivoire (Western Africa, SA Group 1) --- Unmarried / Not In-Union

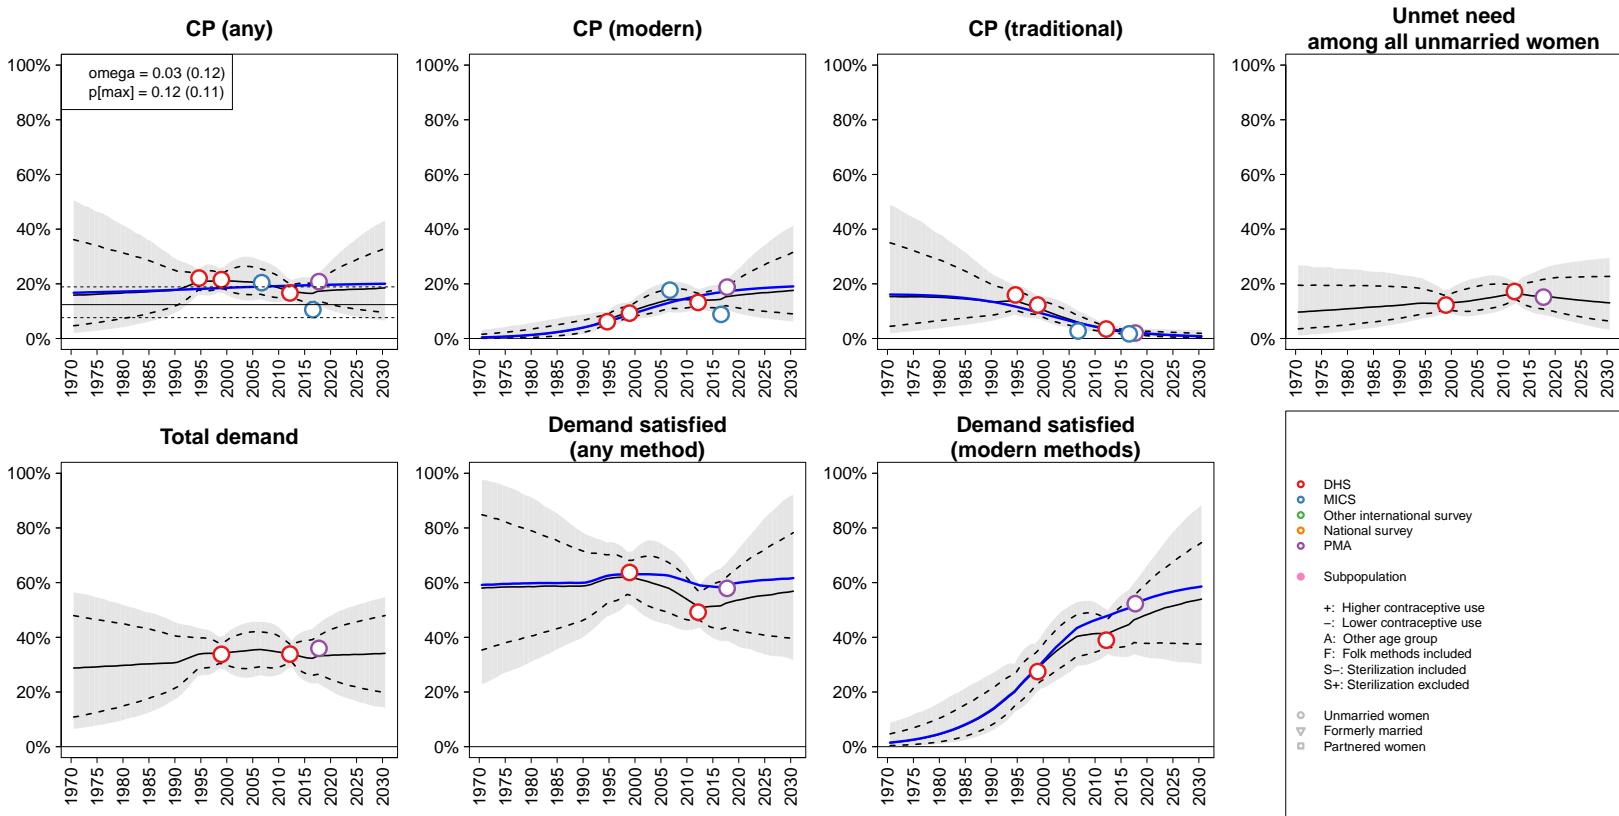

Cuba (Caribbean, SA Group 1) --- Unmarried / Not In-Union

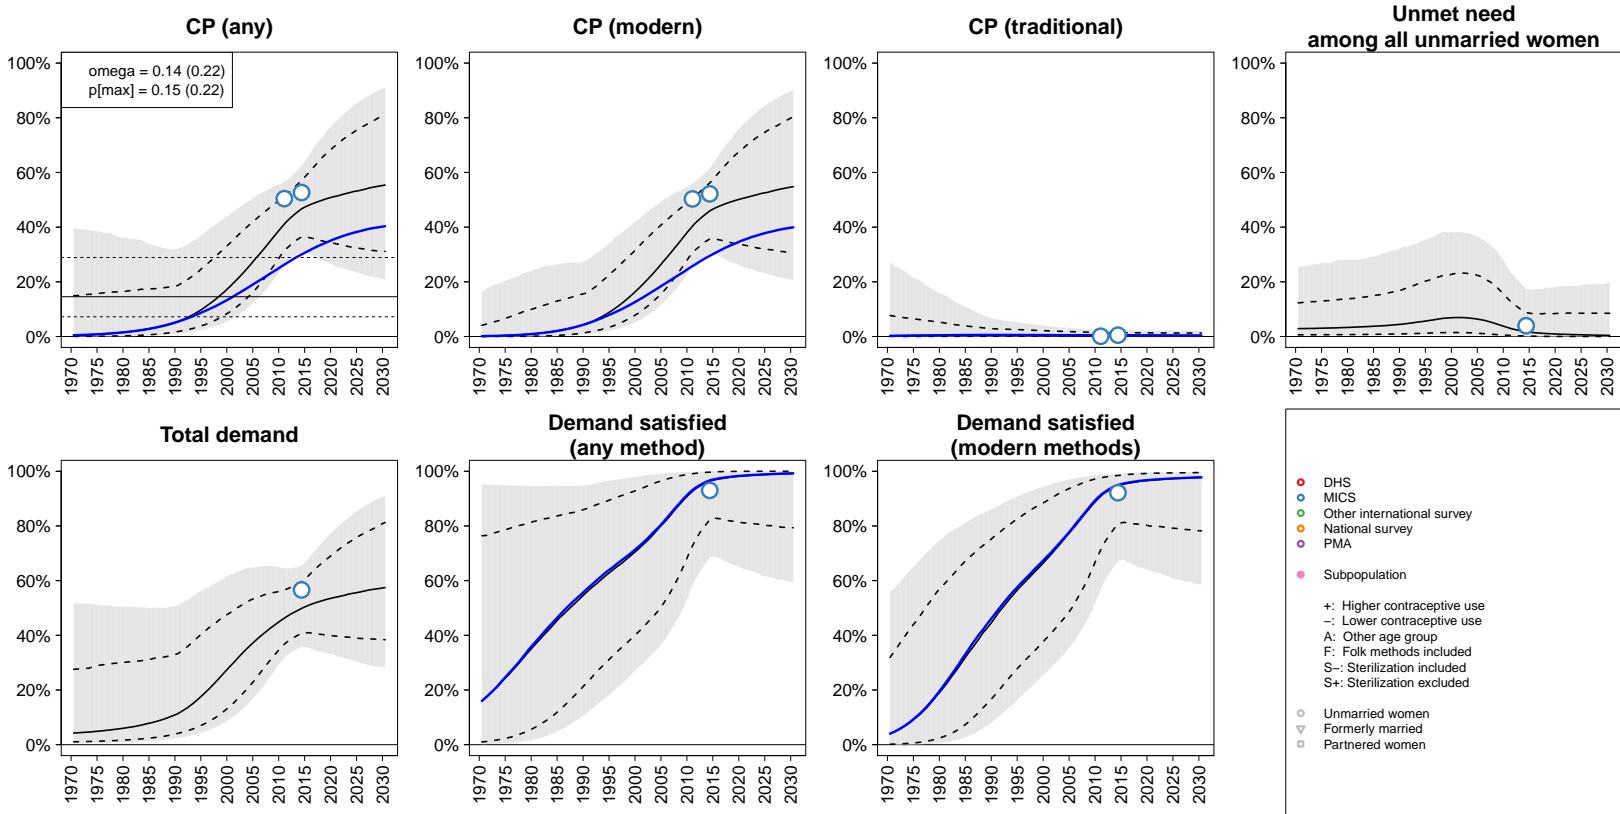

Democratic Rep. of the Congo (Middle Africa, SA Group 1) ---- Unmarried / Not In-Union

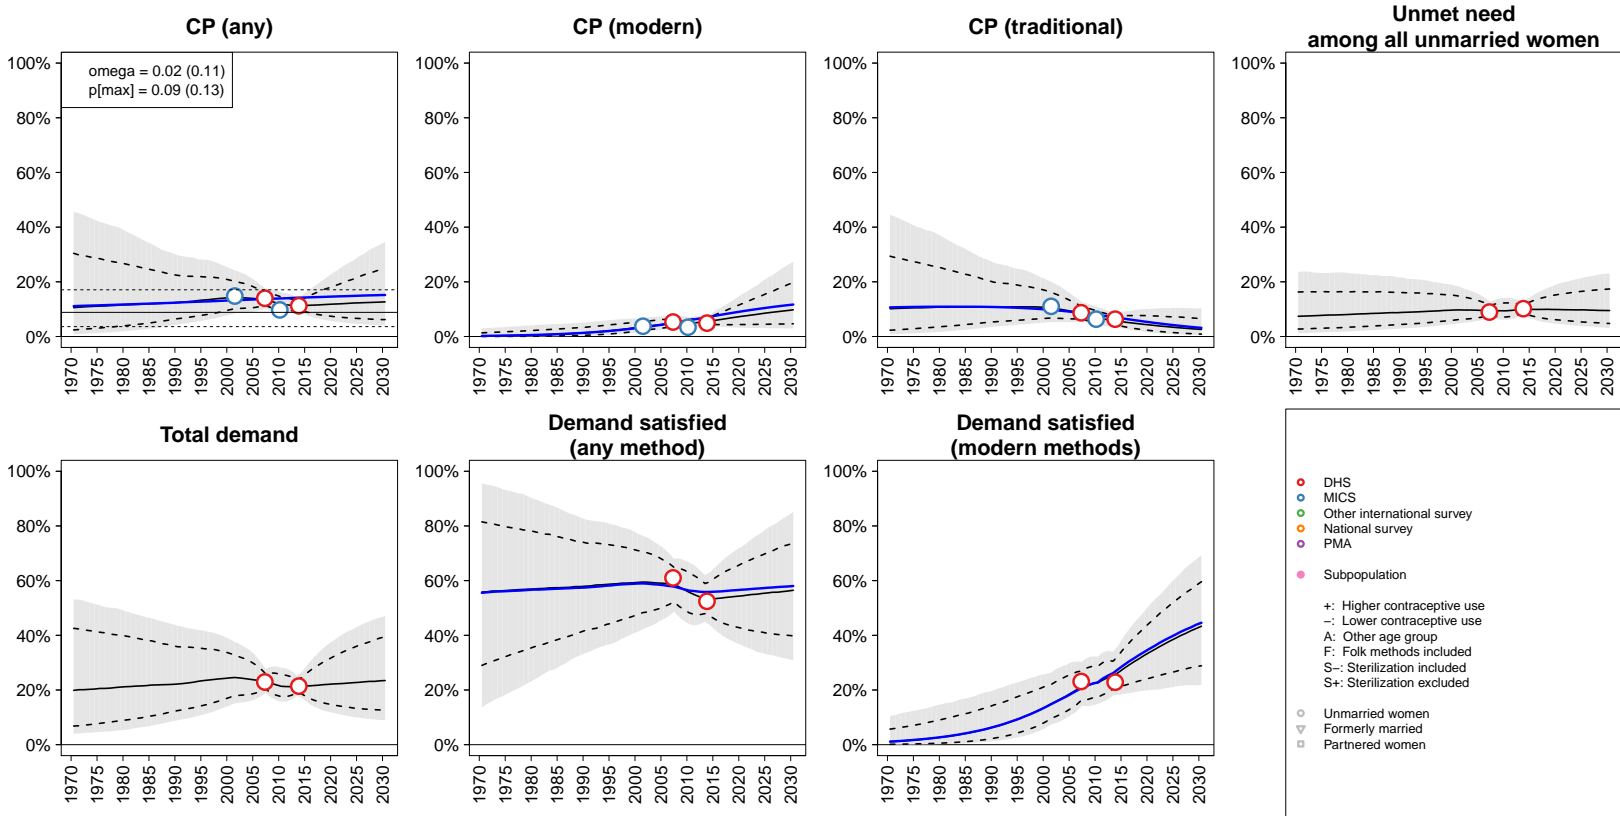

Democratic Republic of Timor-Leste (South-eastern Asia, SA Group 0) --- Unmarried / Not In-Union

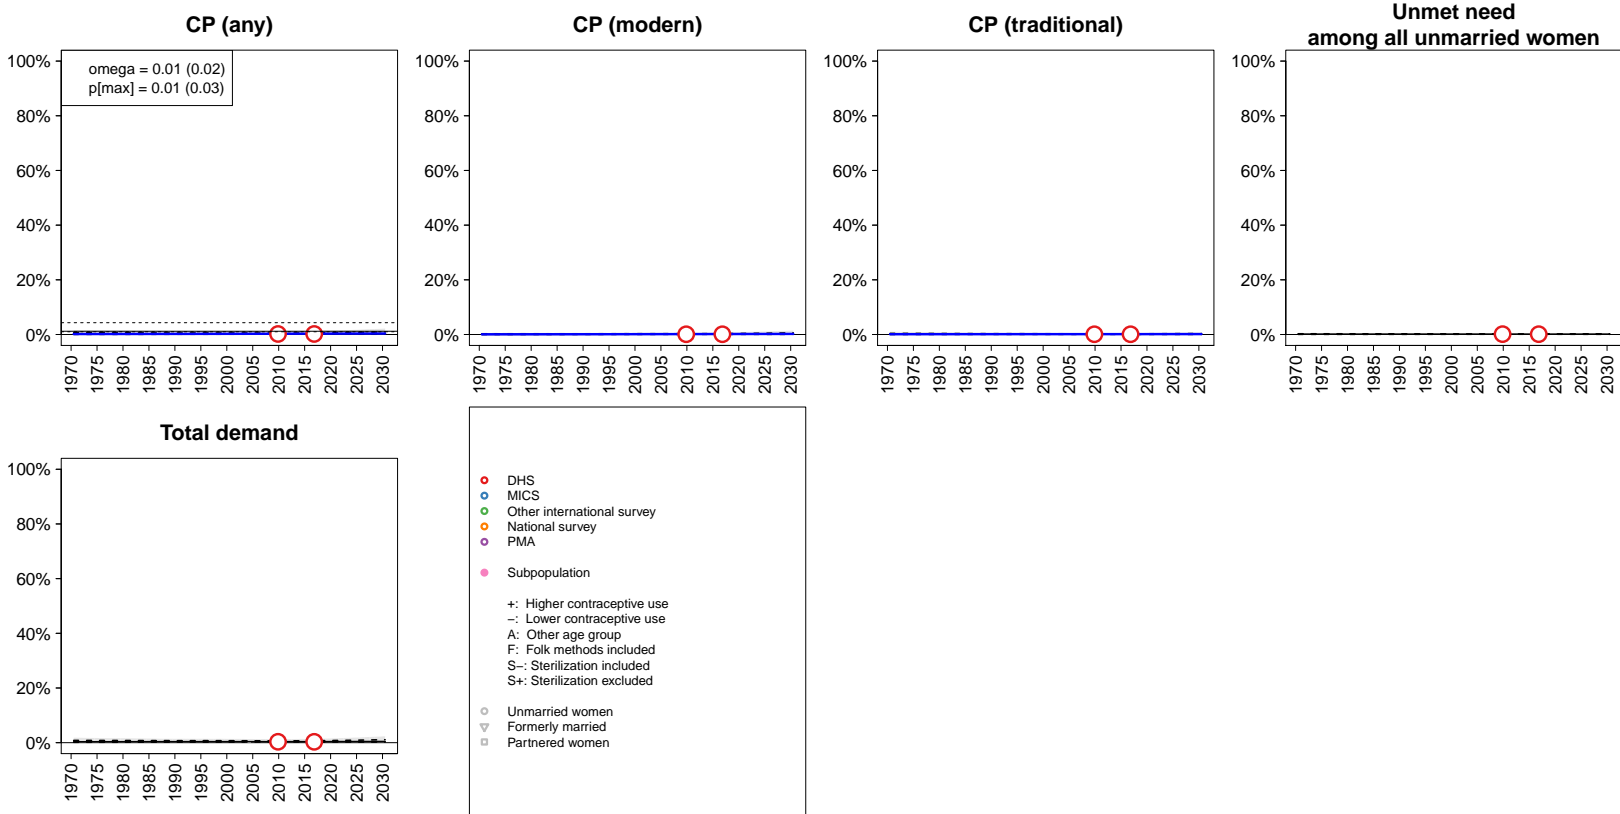

Dominican Republic (Caribbean, SA Group 1) --- Unmarried / Not In-Union

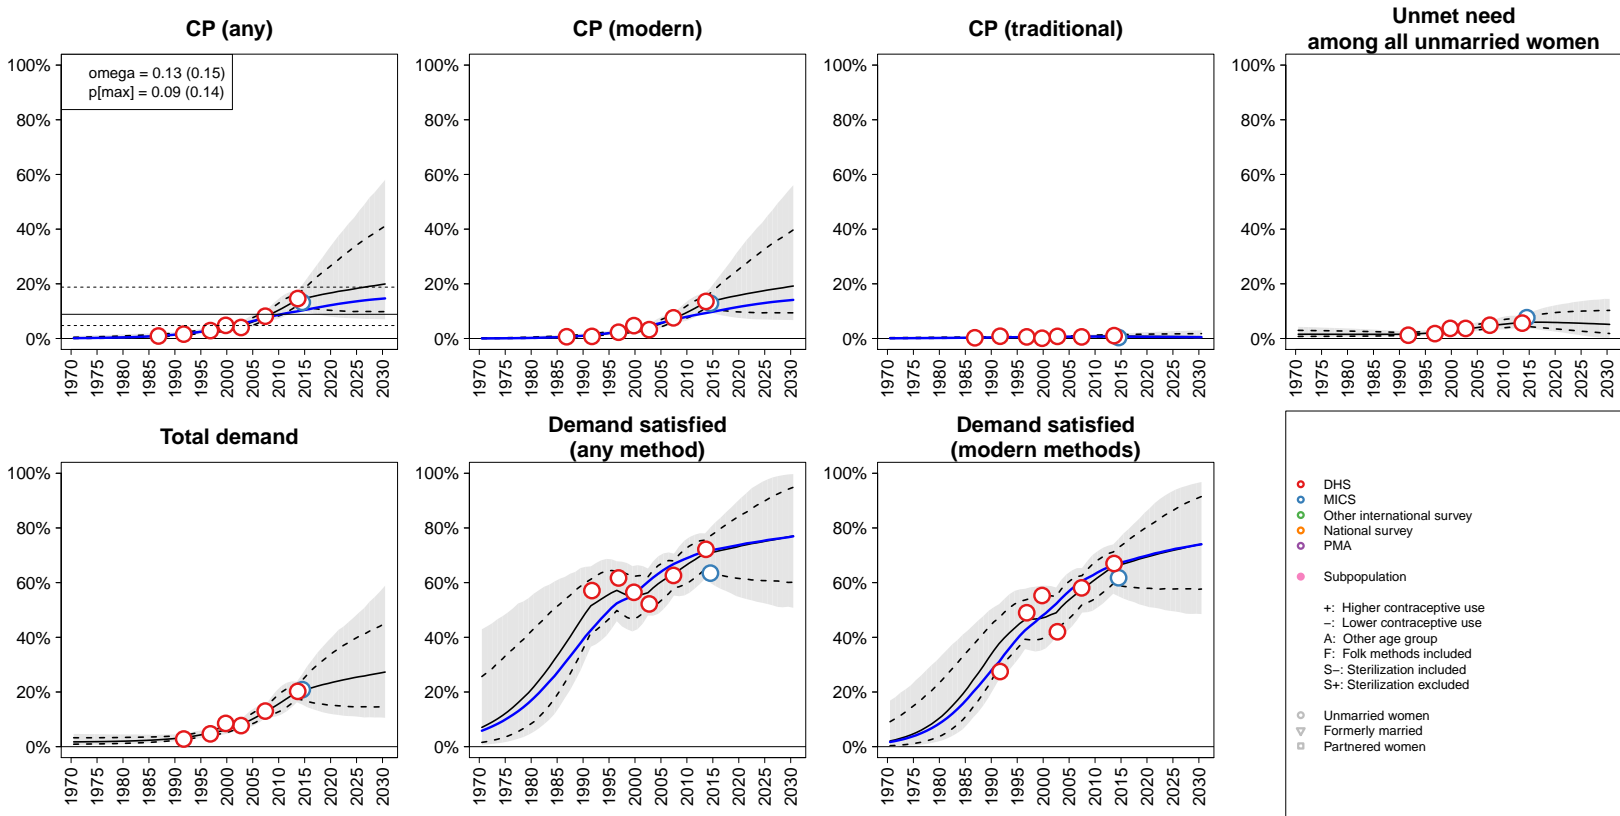

Ecuador (South America, SA Group 1) --- Unmarried / Not In-Union

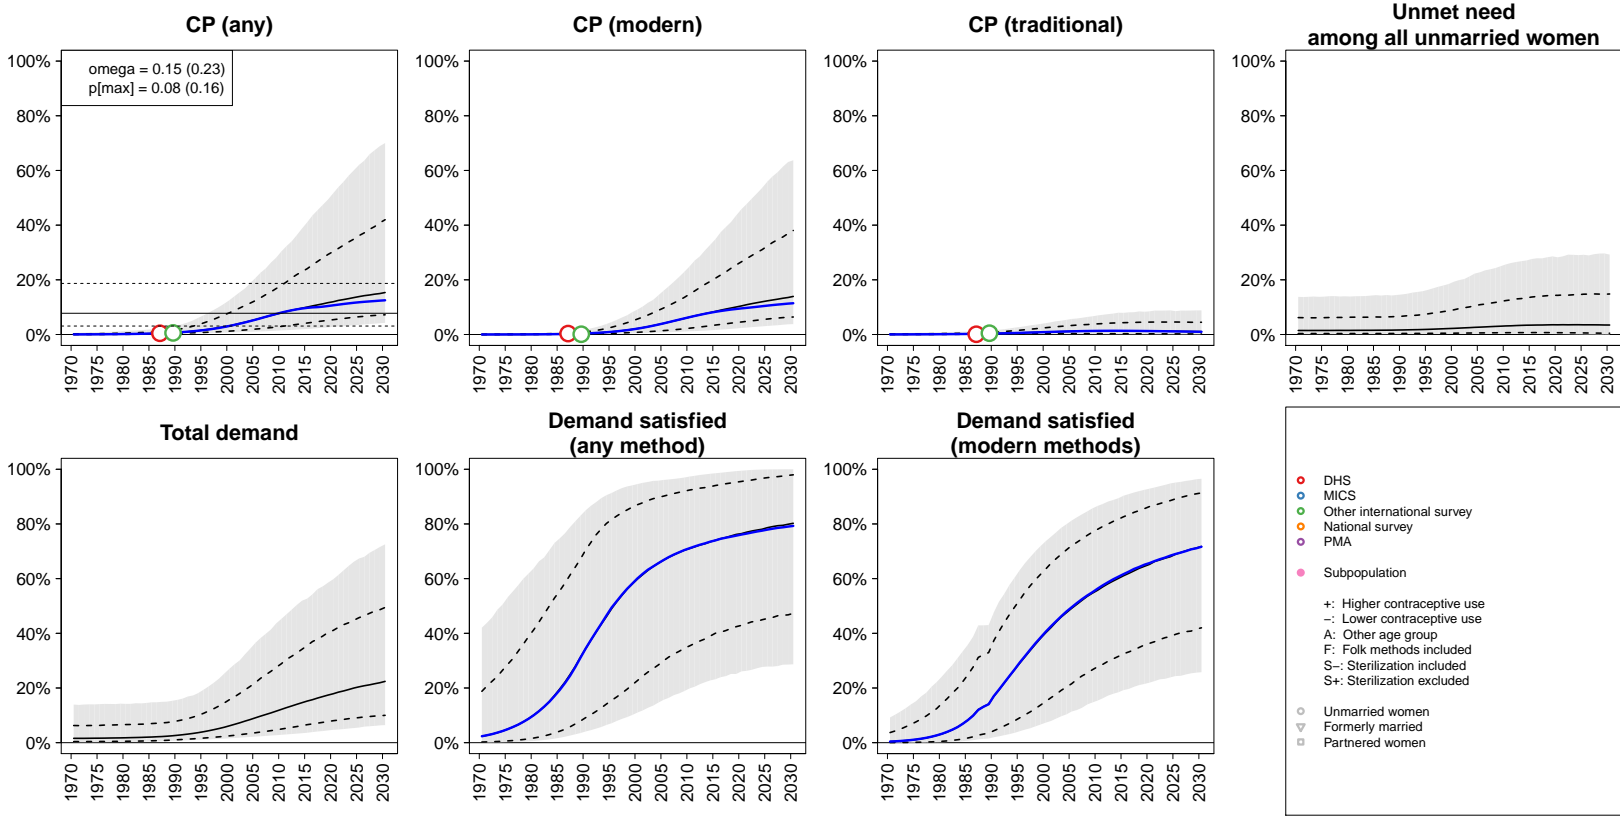

El Salvador (Central America, SA Group 1) --- Unmarried / Not In-Union

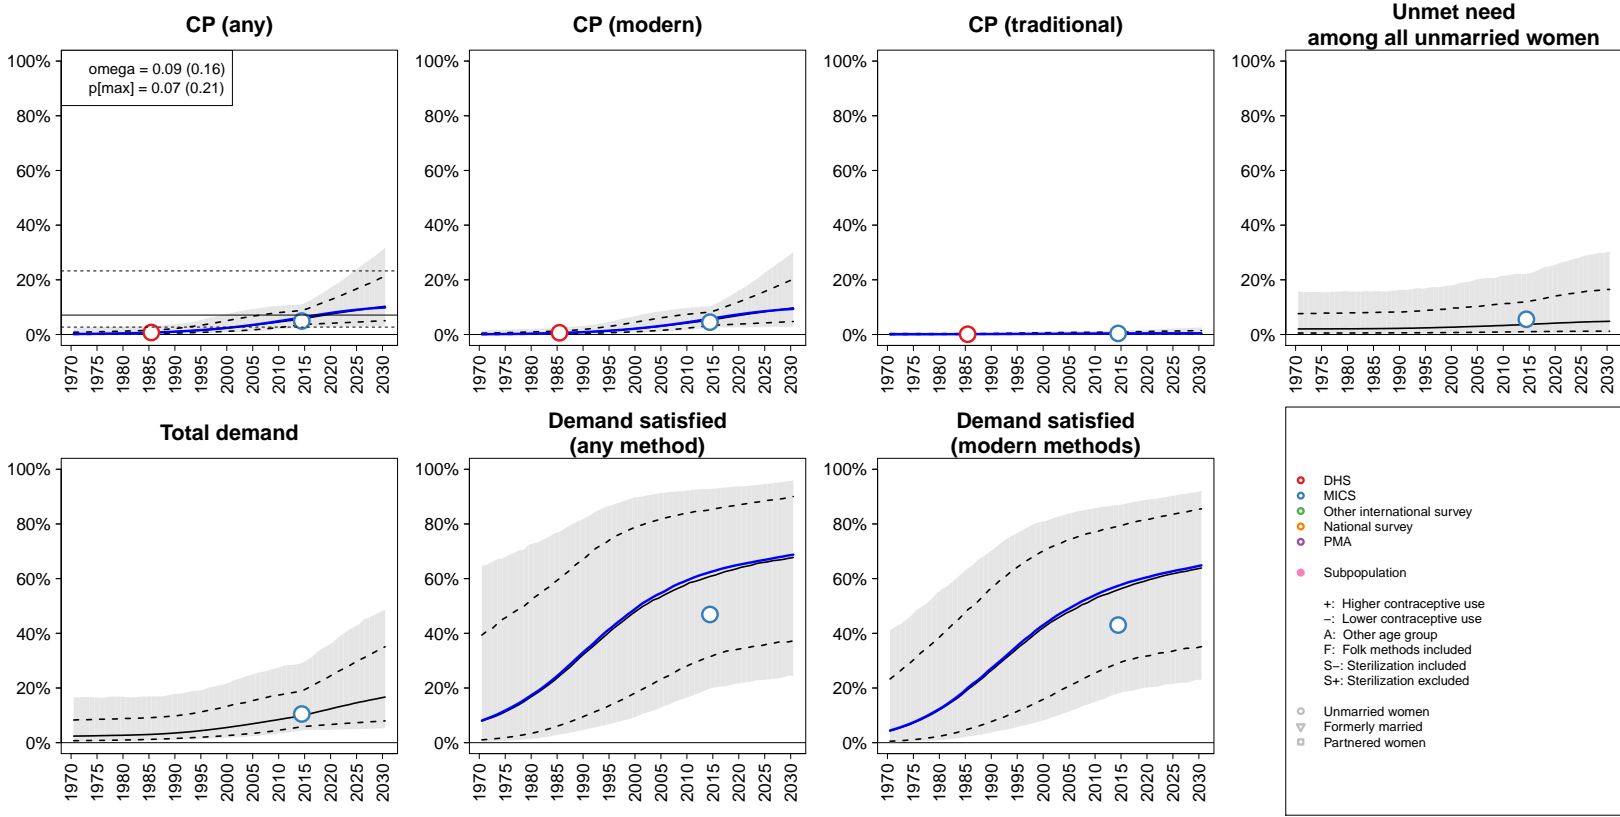



Eritrea (Eastern Africa, SA Group 1) --- Unmarried / Not In-Union

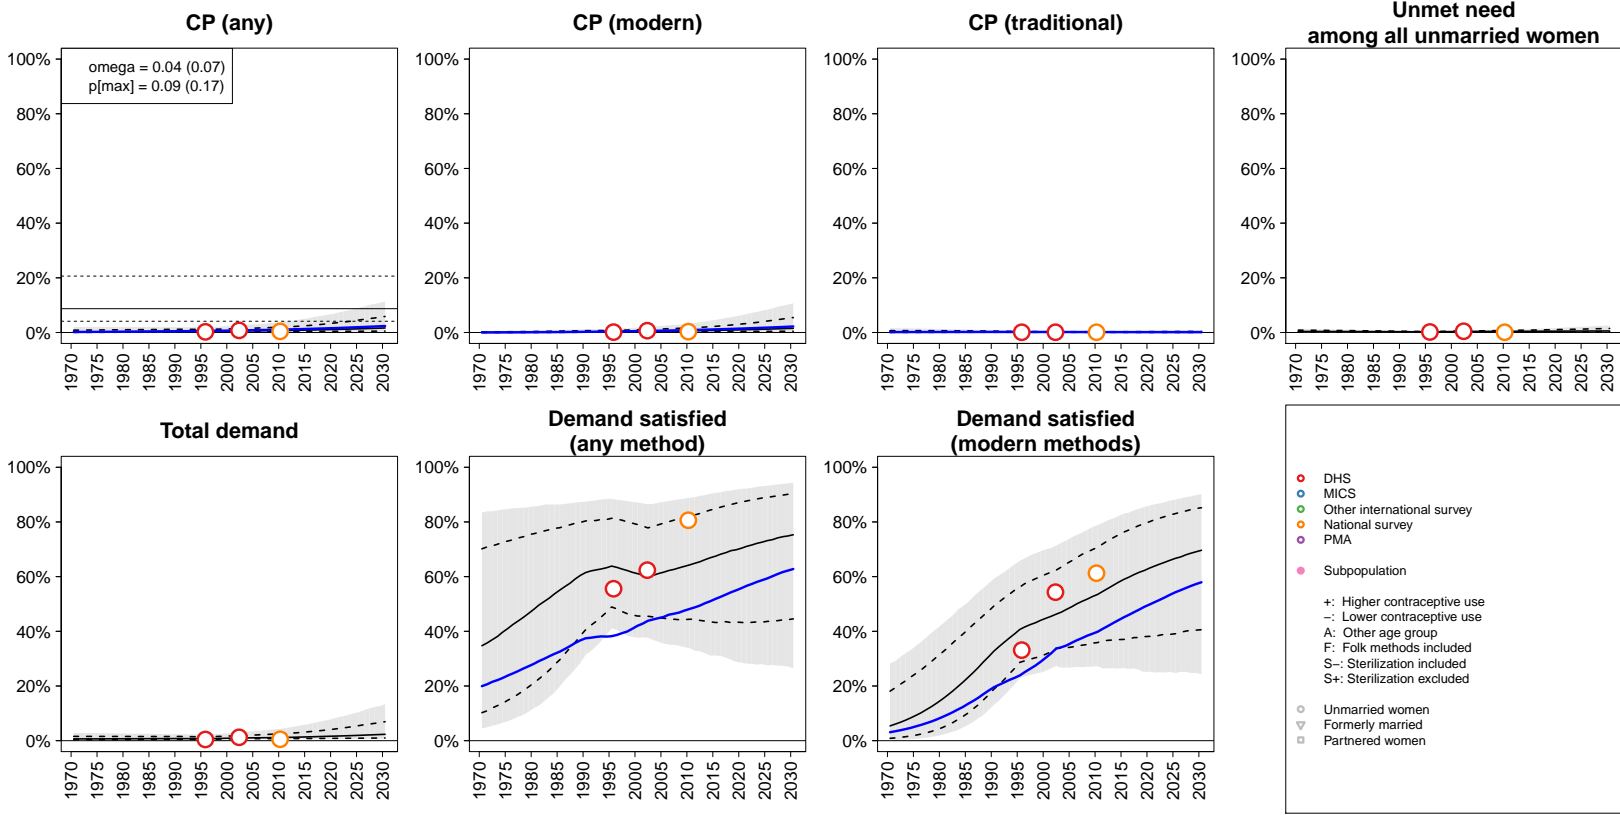

Eswatini (Southern Africa, SA Group 1) --- Unmarried / Not In-Union

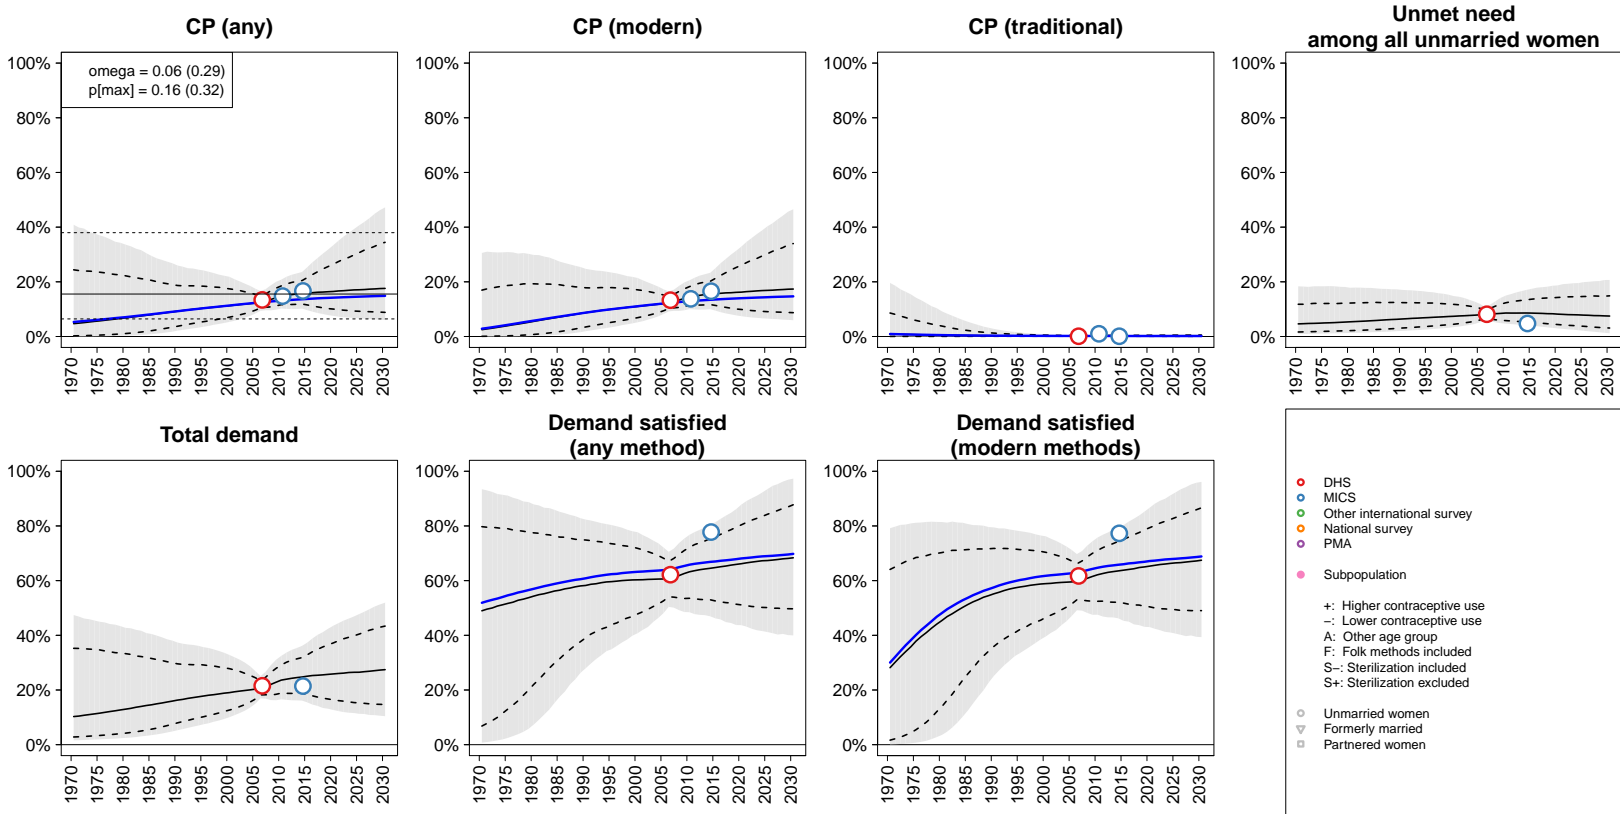

Ethiopia (Eastern Africa, SA Group 1) --- Unmarried / Not In-Union

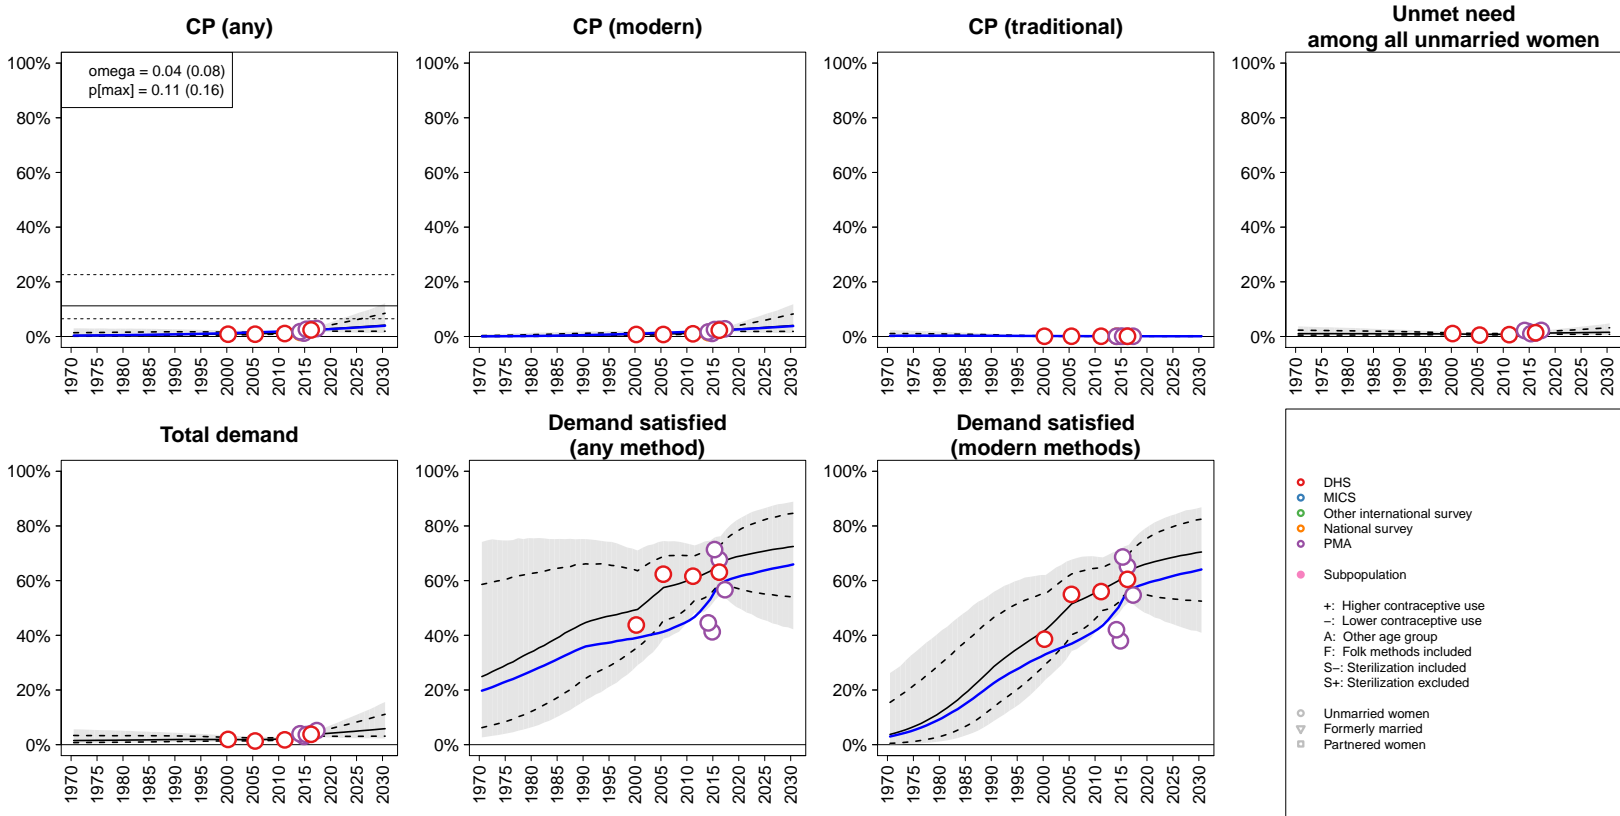

Gabon (Middle Africa, SA Group 1) --- Unmarried / Not In-Union

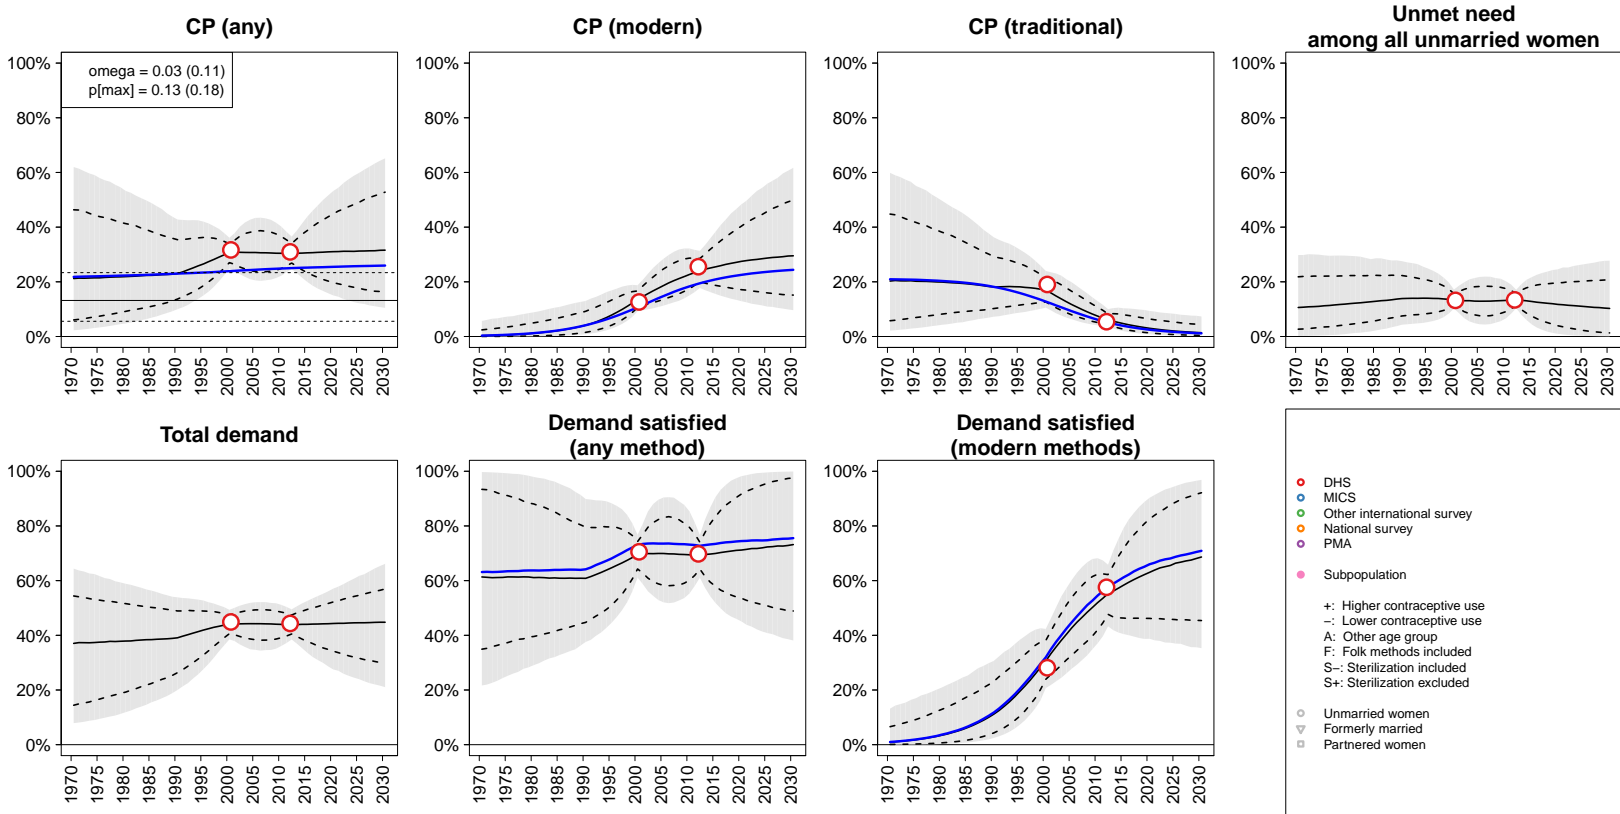

Gambia (Western Africa, SA Group 1) --- Unmarried / Not In-Union

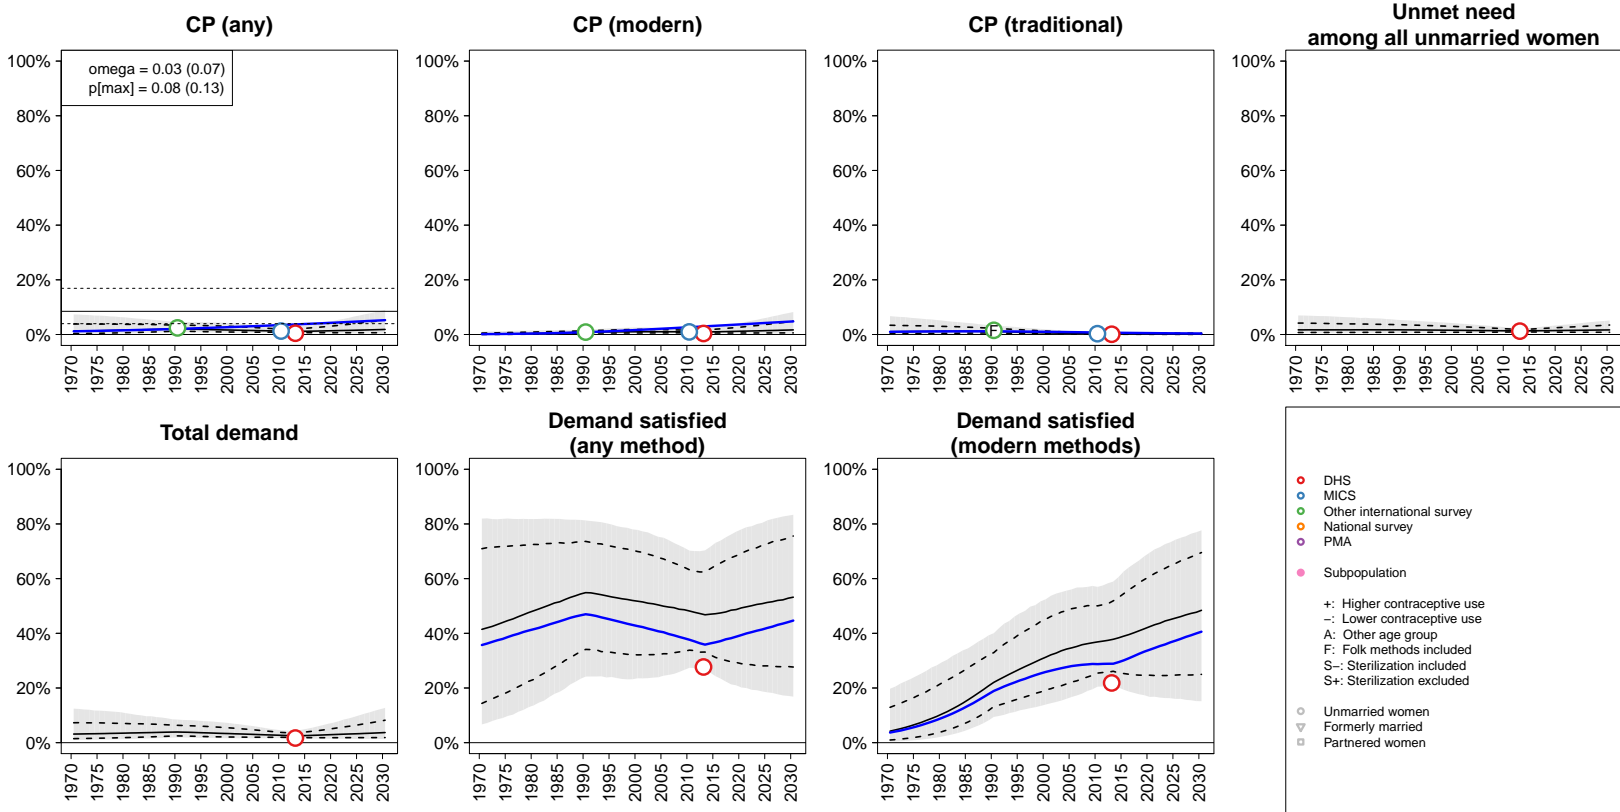

Ghana (Western Africa, SA Group 1) — Unmarried / Not In-Union

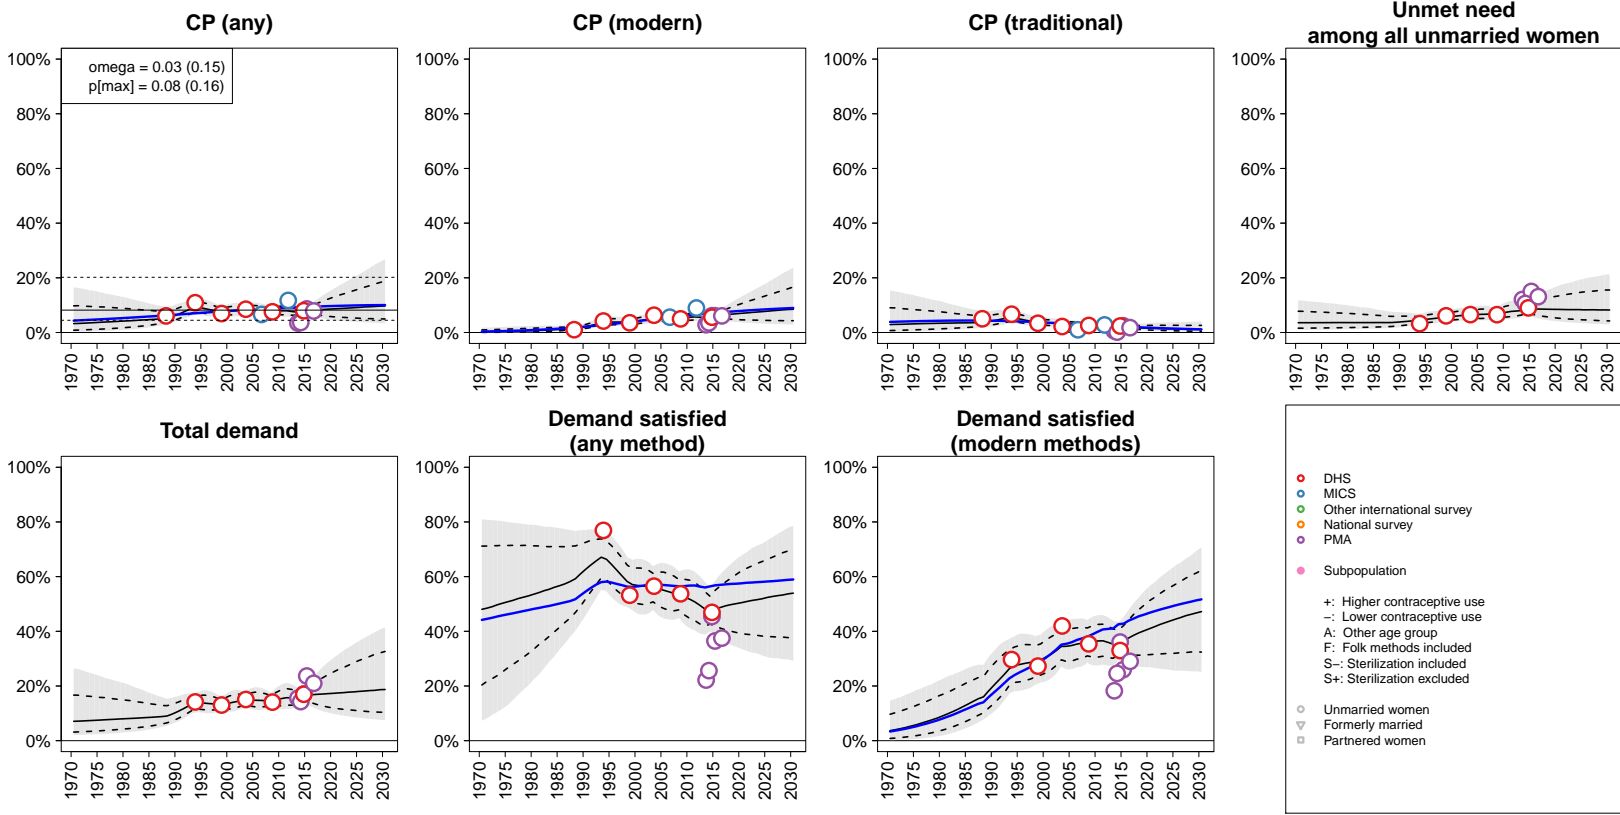

Guatemala (Central America, SA Group 1) --- Unmarried / Not In-Union

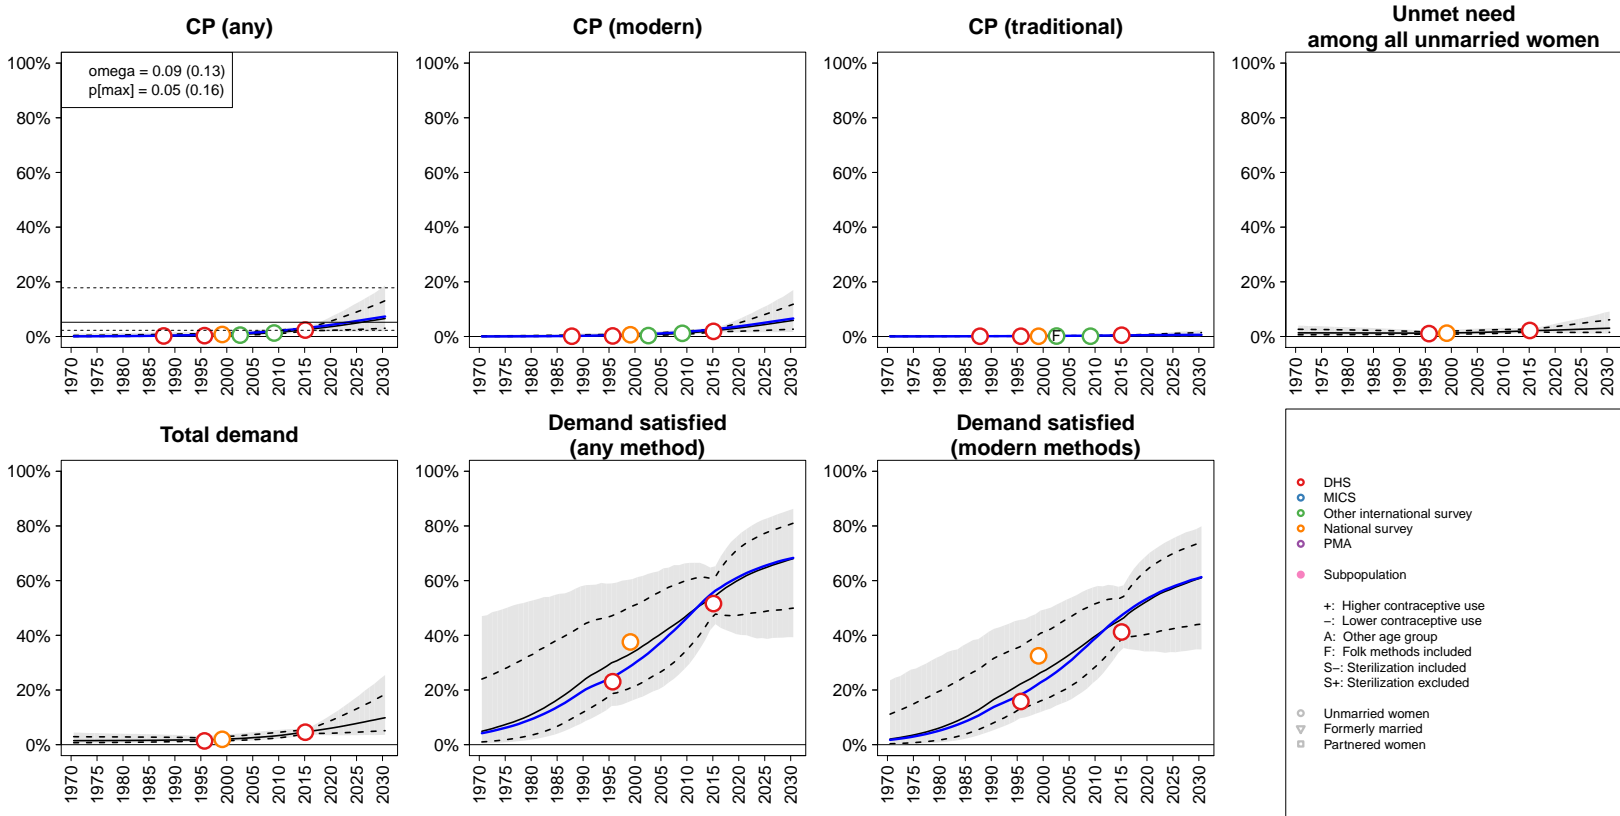

Guinea-Bissau (Western Africa, SA Group 1) --- Unmarried / Not In-Union

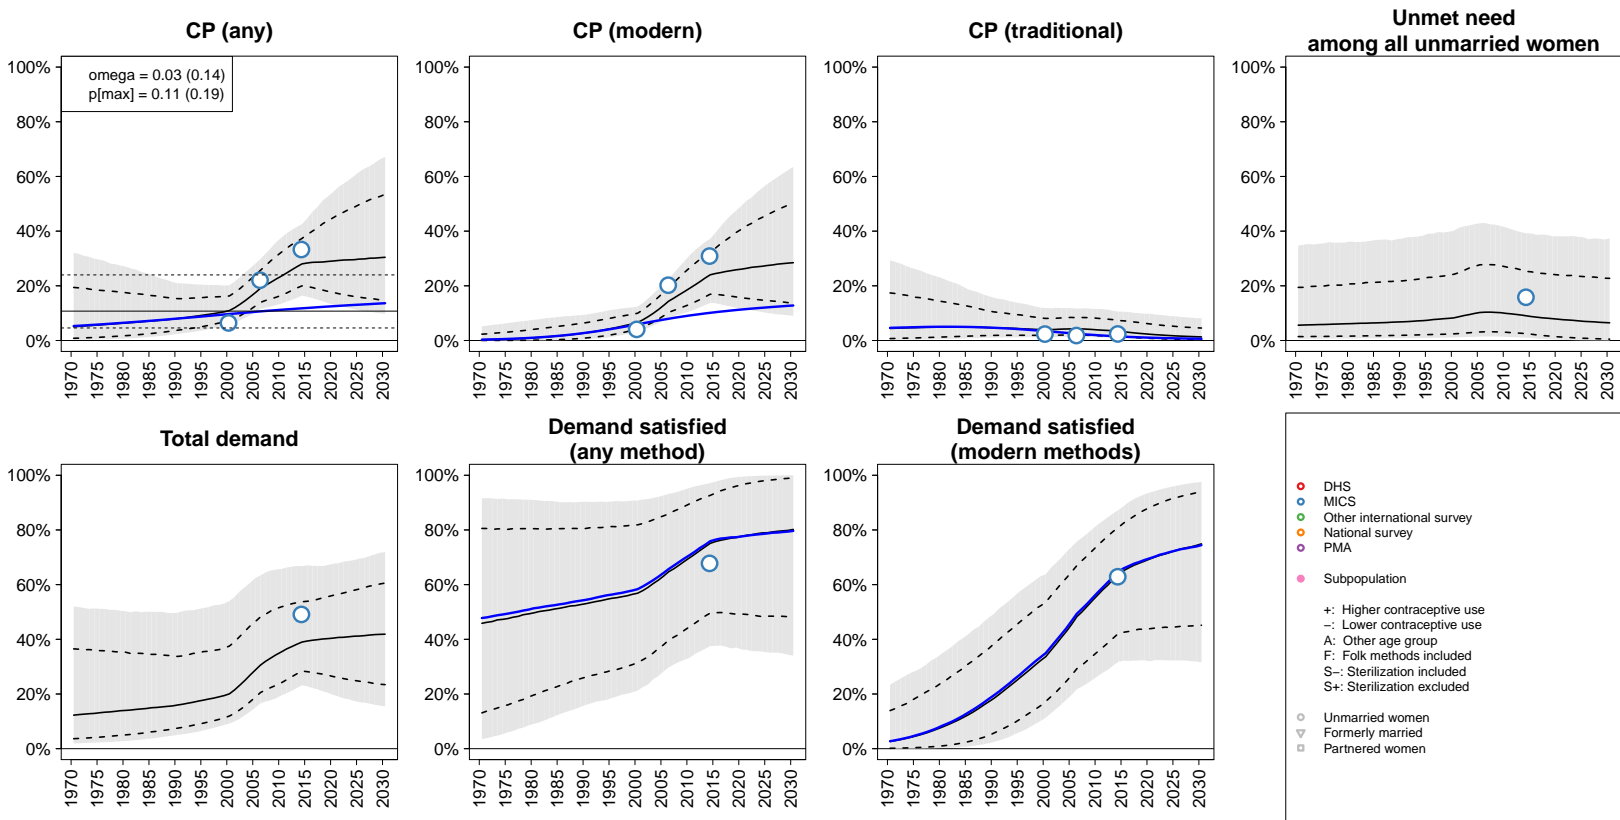



Guinea (Western Africa, SA Group 1) --- Unmarried / Not In-Union

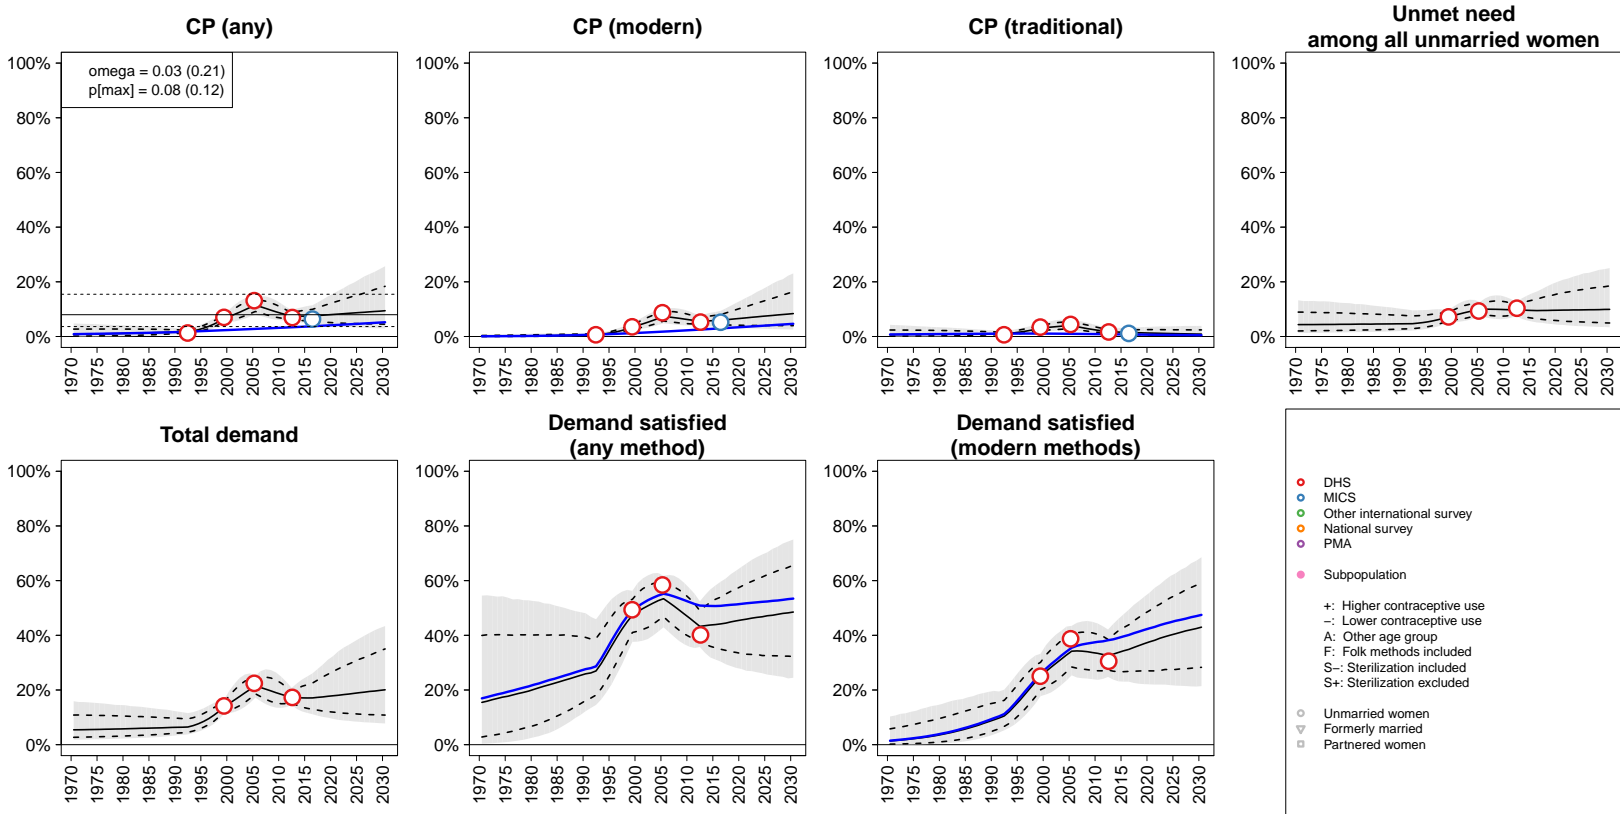

Guyana (South America, SA Group 1) --- Unmarried / Not In-Union

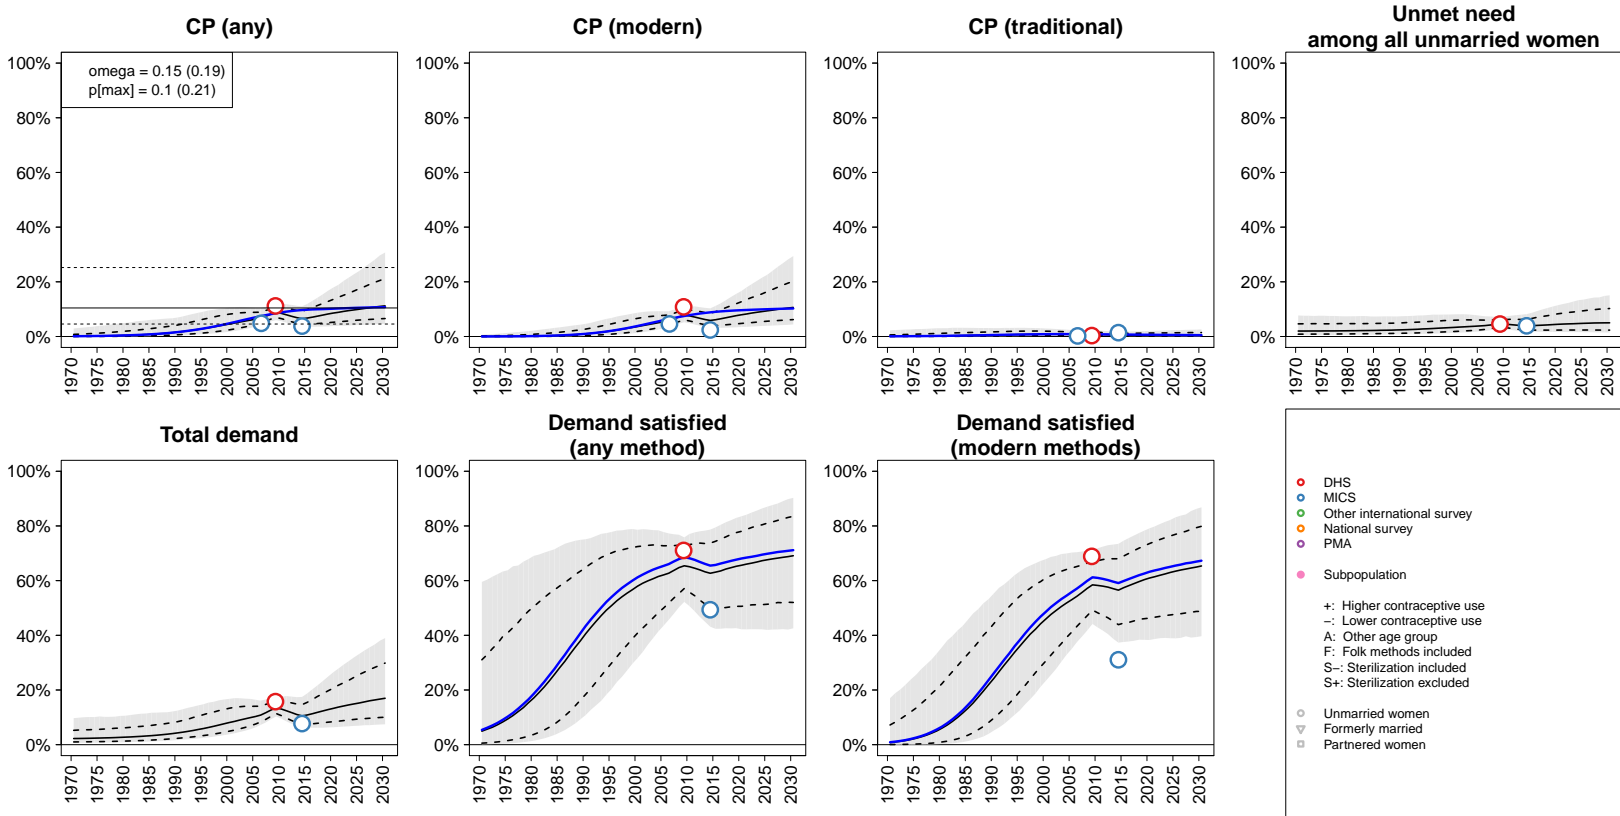

Haiti (Caribbean, SA Group 1) --- Unmarried / Not In-Union

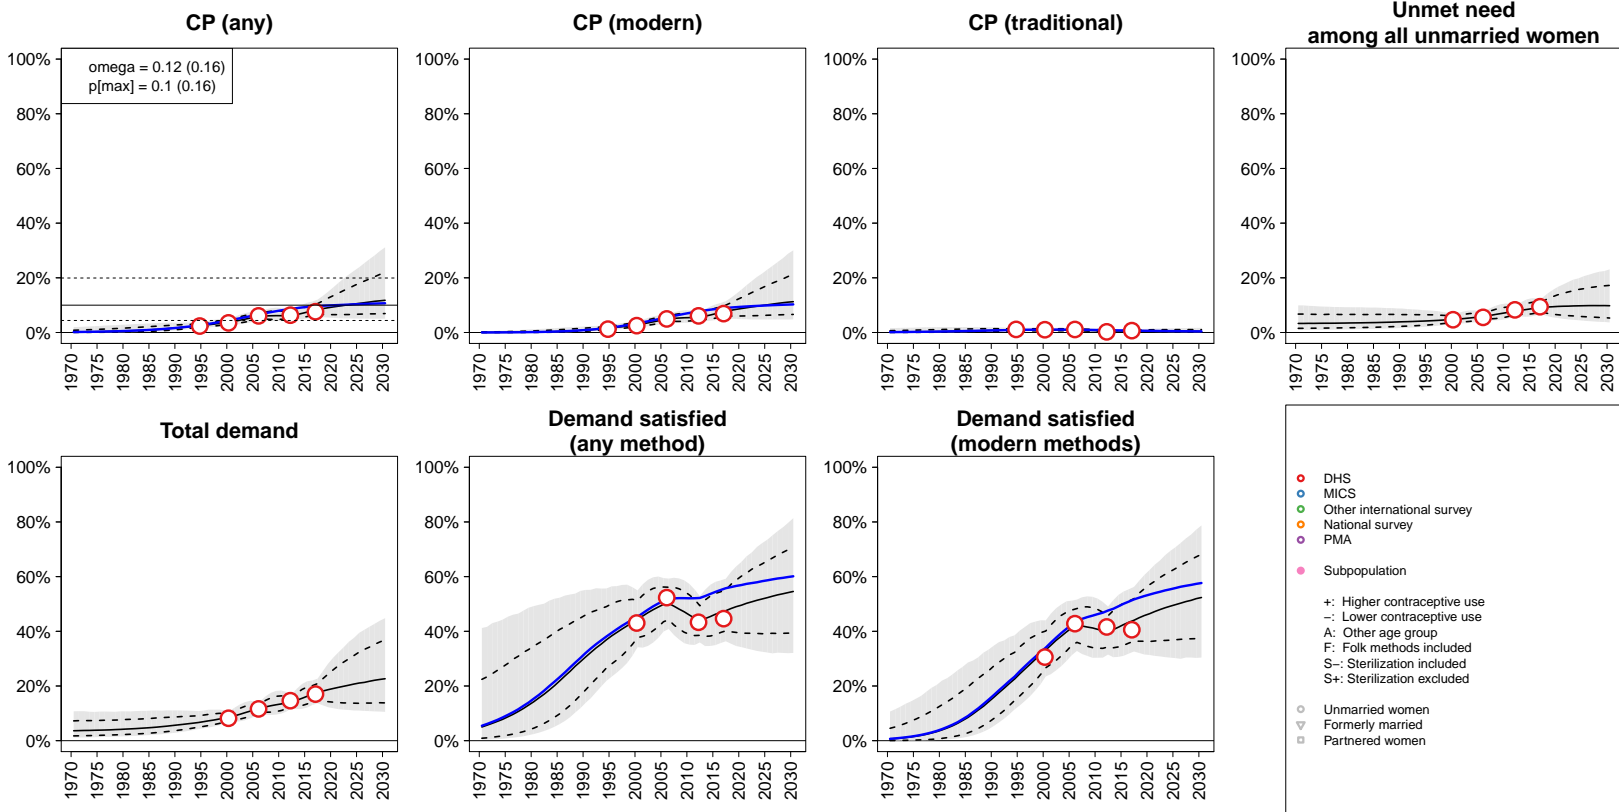

Honduras (Central America, SA Group 1) --- Unmarried / Not In-Union

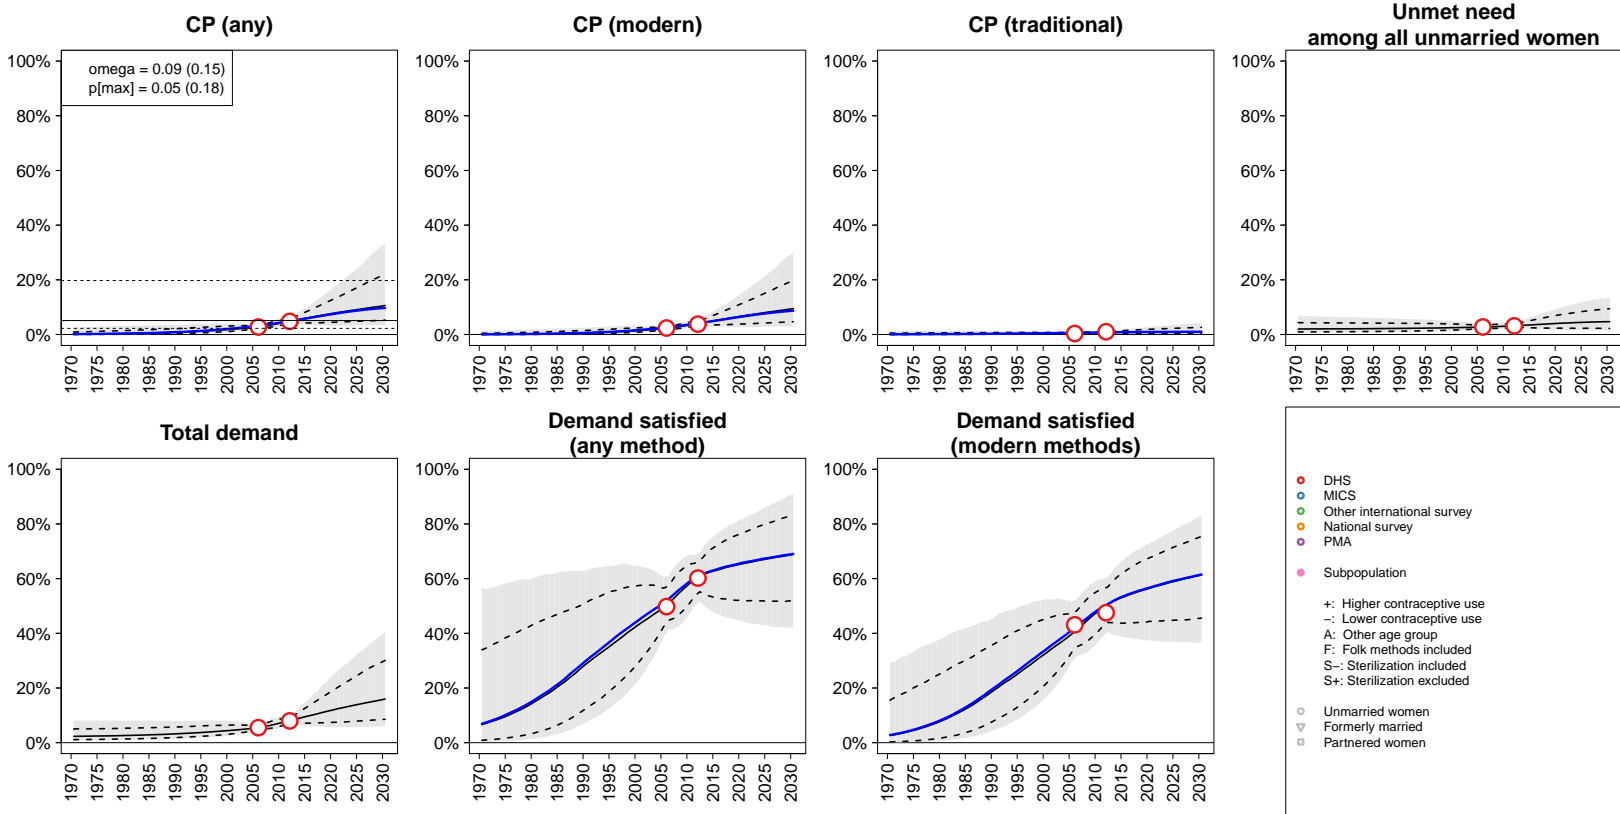

India (Southern Asia, SA Group 0) --- Unmarried / Not In-Union

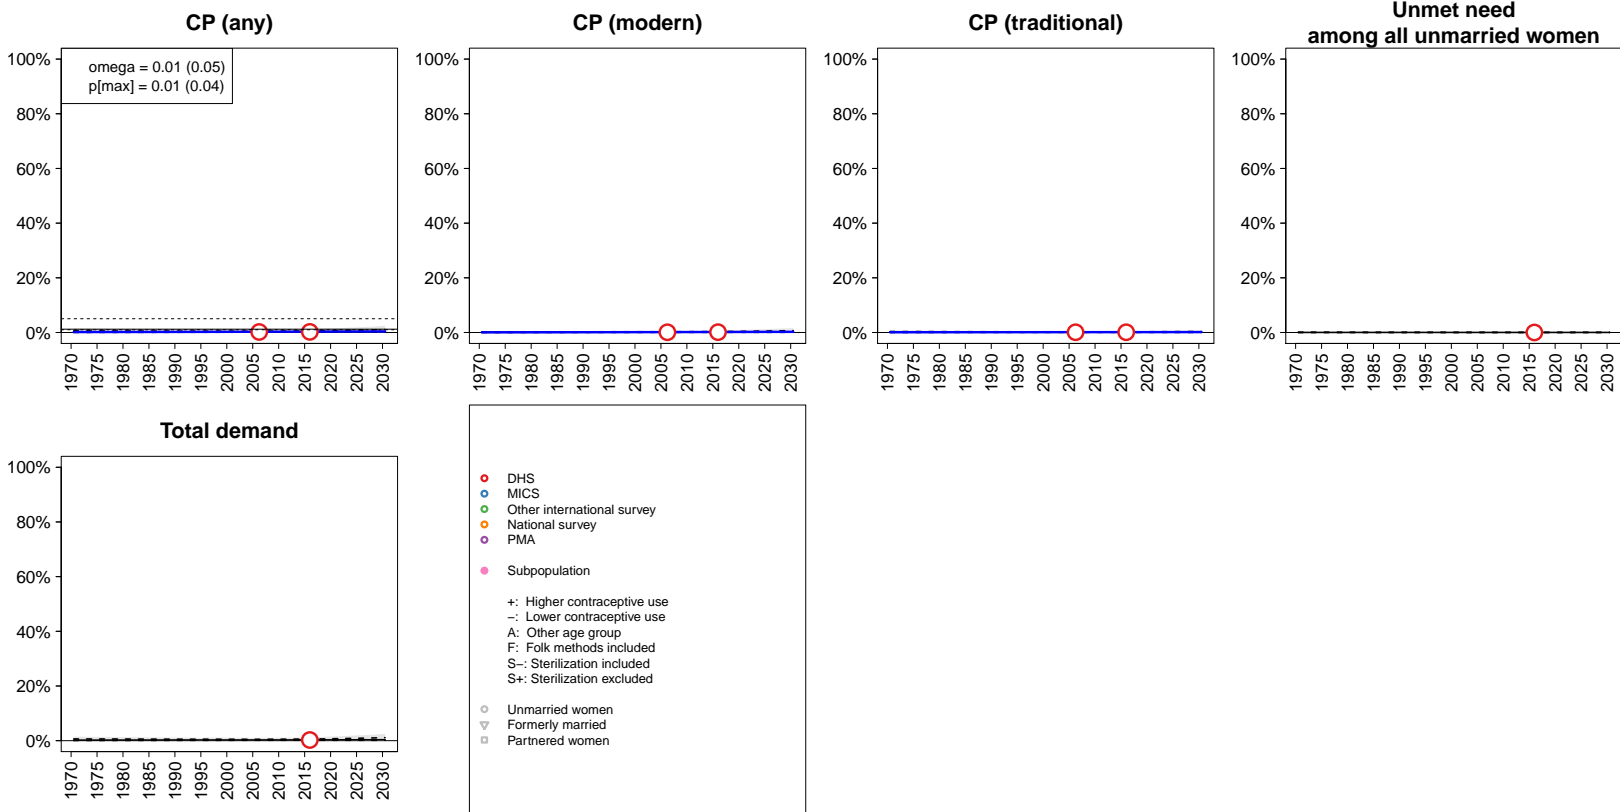

Indonesia (South-eastern Asia, SA Group 0) --- Unmarried / Not In-Union

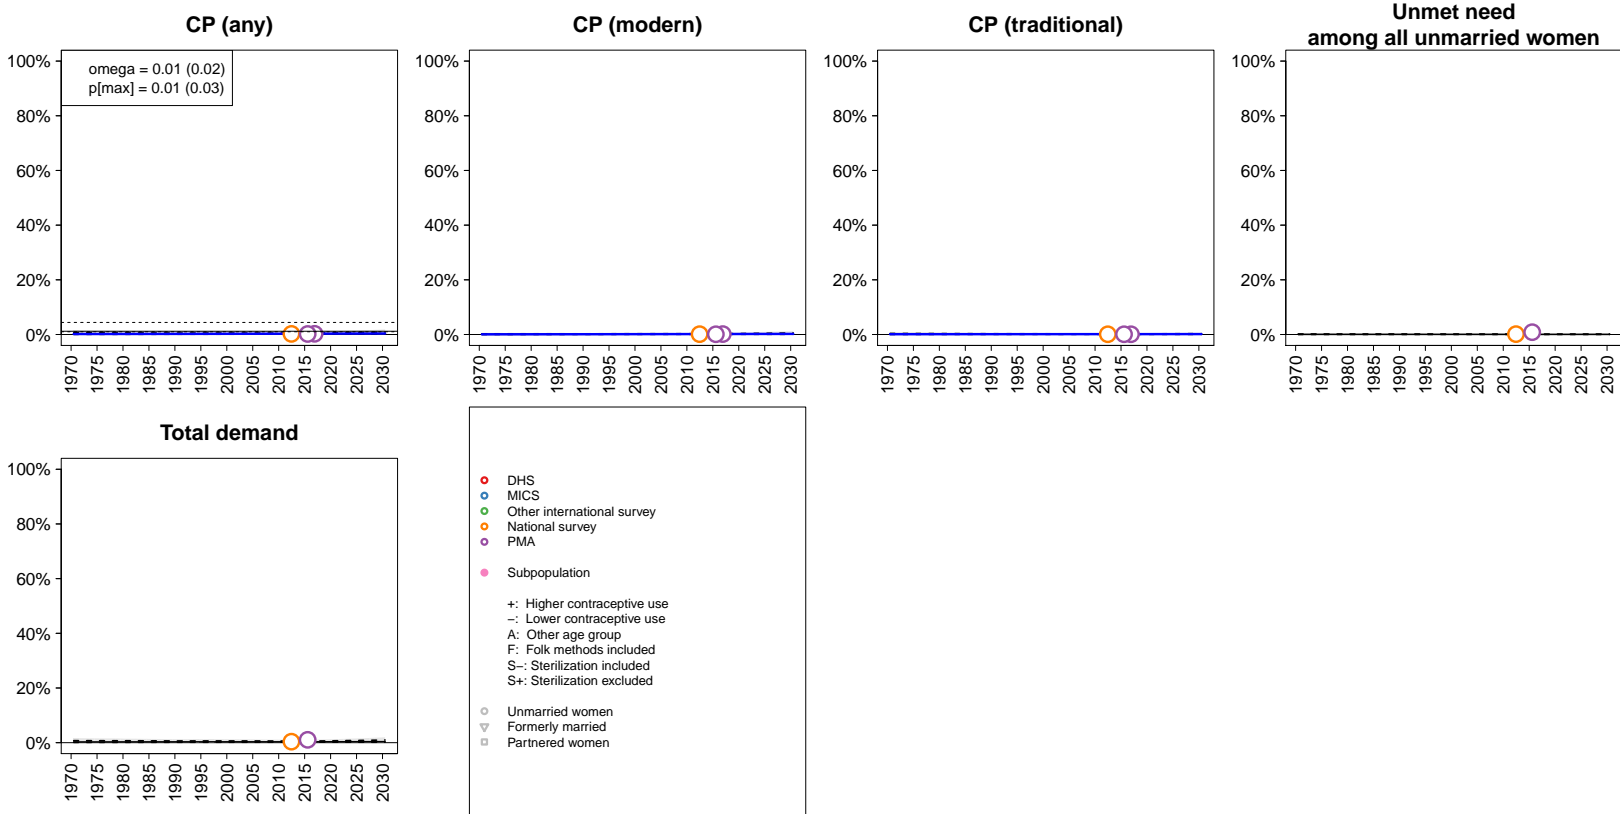

Jamaica (Caribbean, SA Group 1) --- Unmarried / Not In-Union

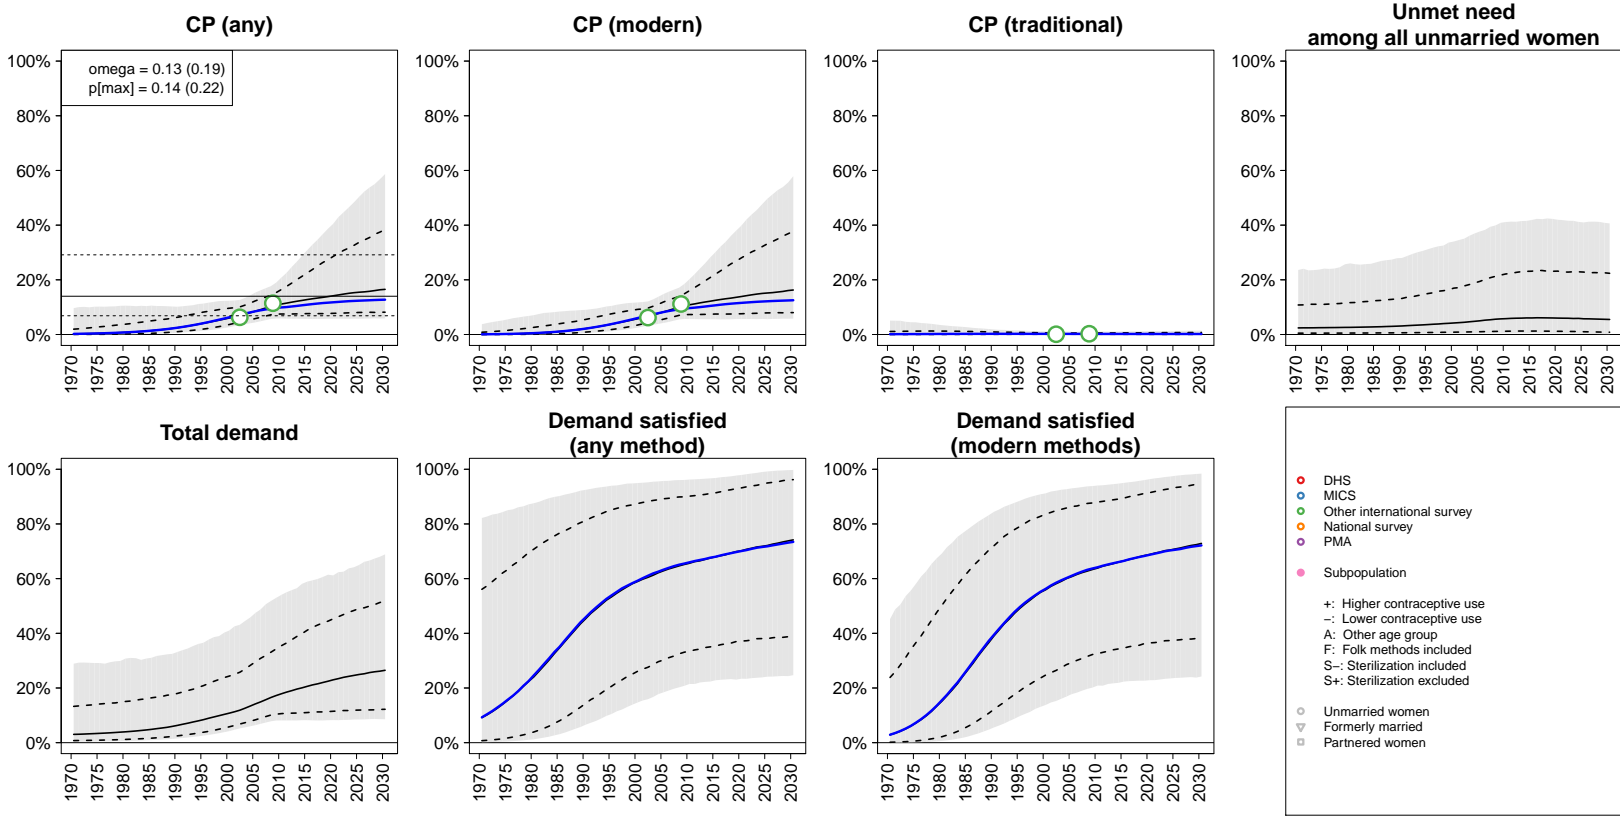

Kazakhstan (Central Asia, SA Group 1) --- Unmarried / Not In-Union

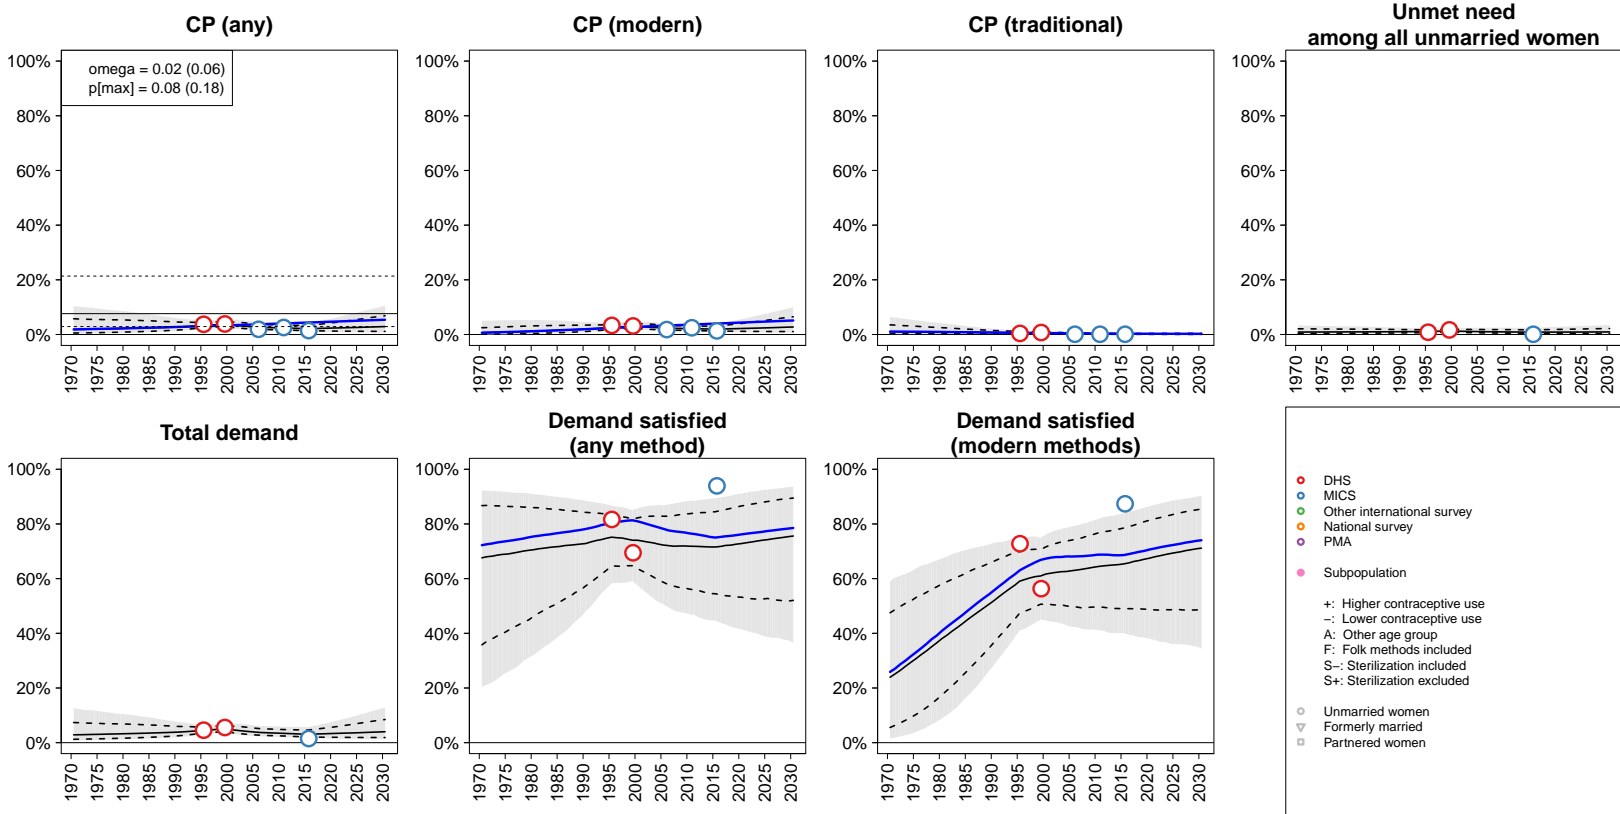



Kenya (Eastern Africa, SA Group 1) --- Unmarried / Not In-Union

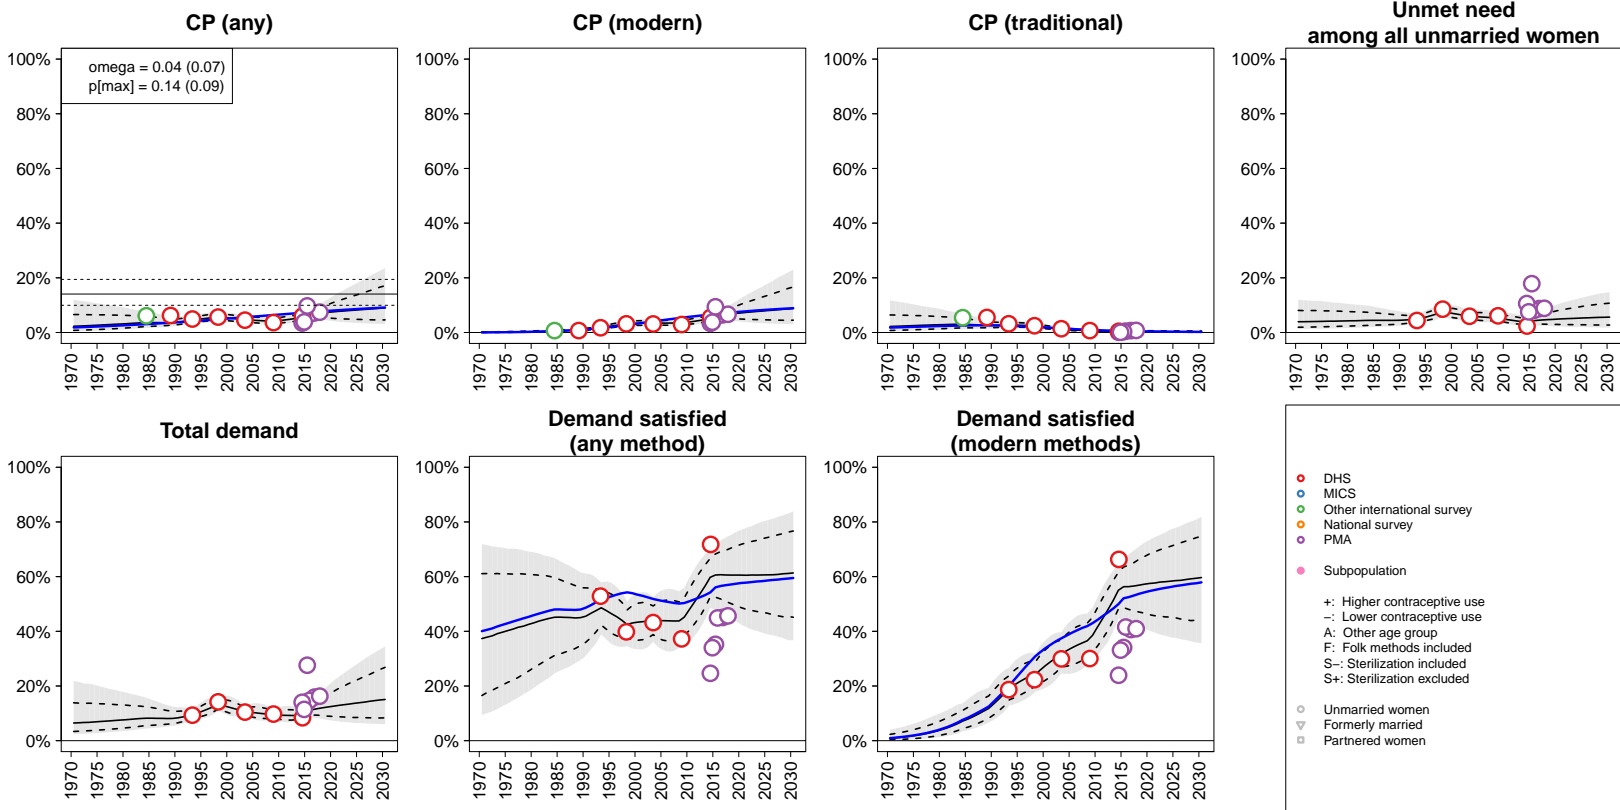

Kyrgyzstan (Central Asia, SA Group 1) --- Unmarried / Not In-Union

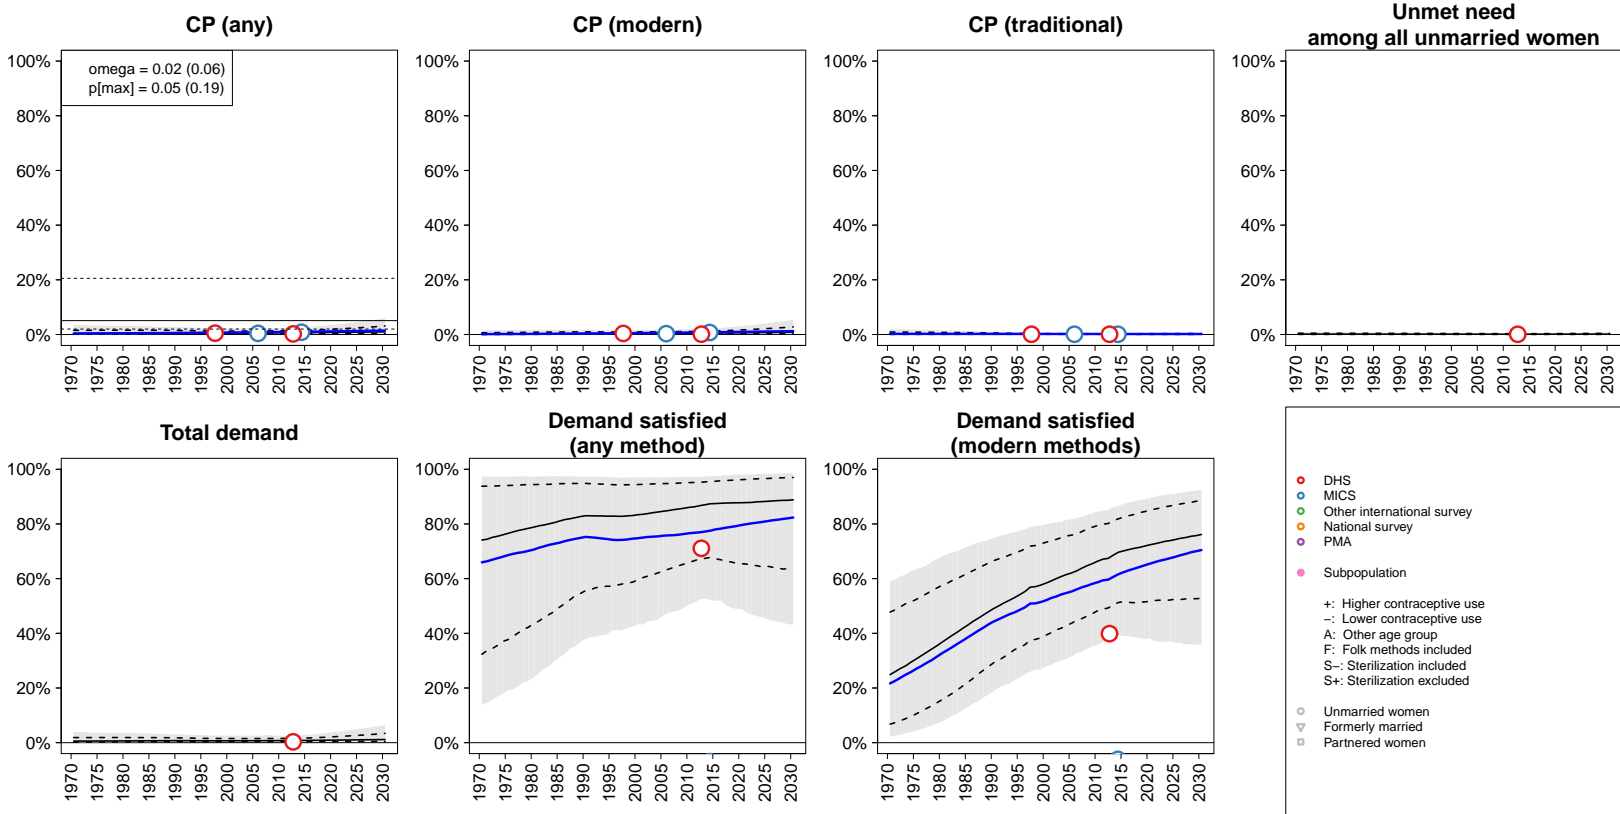

Lesotho (Southern Africa, SA Group 1) --- Unmarried / Not In-Union

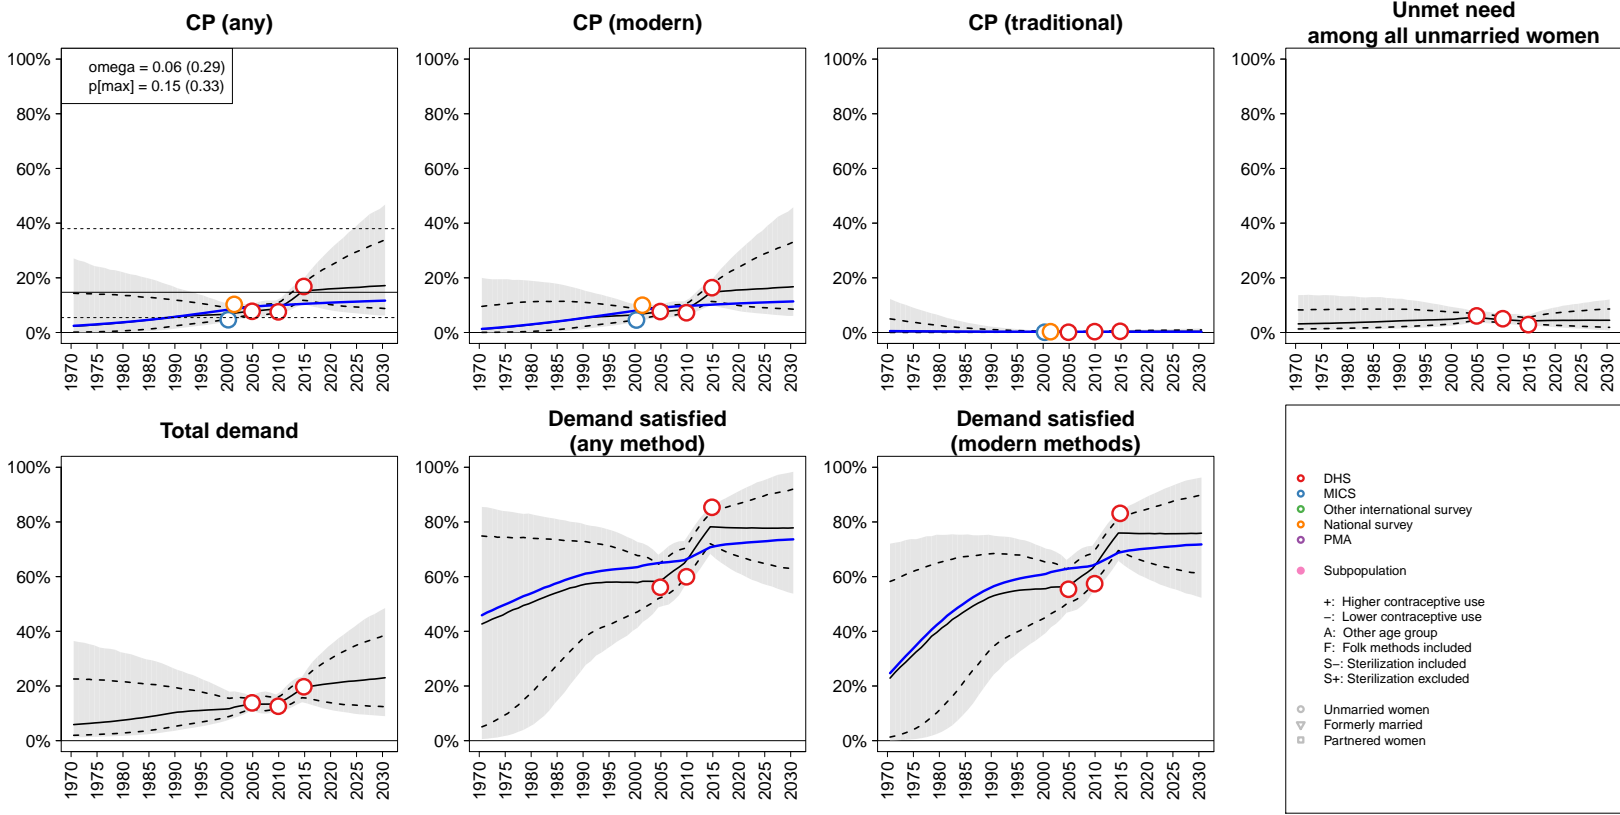

Liberia (Western Africa, SA Group 1) — Unmarried / Not In-Union

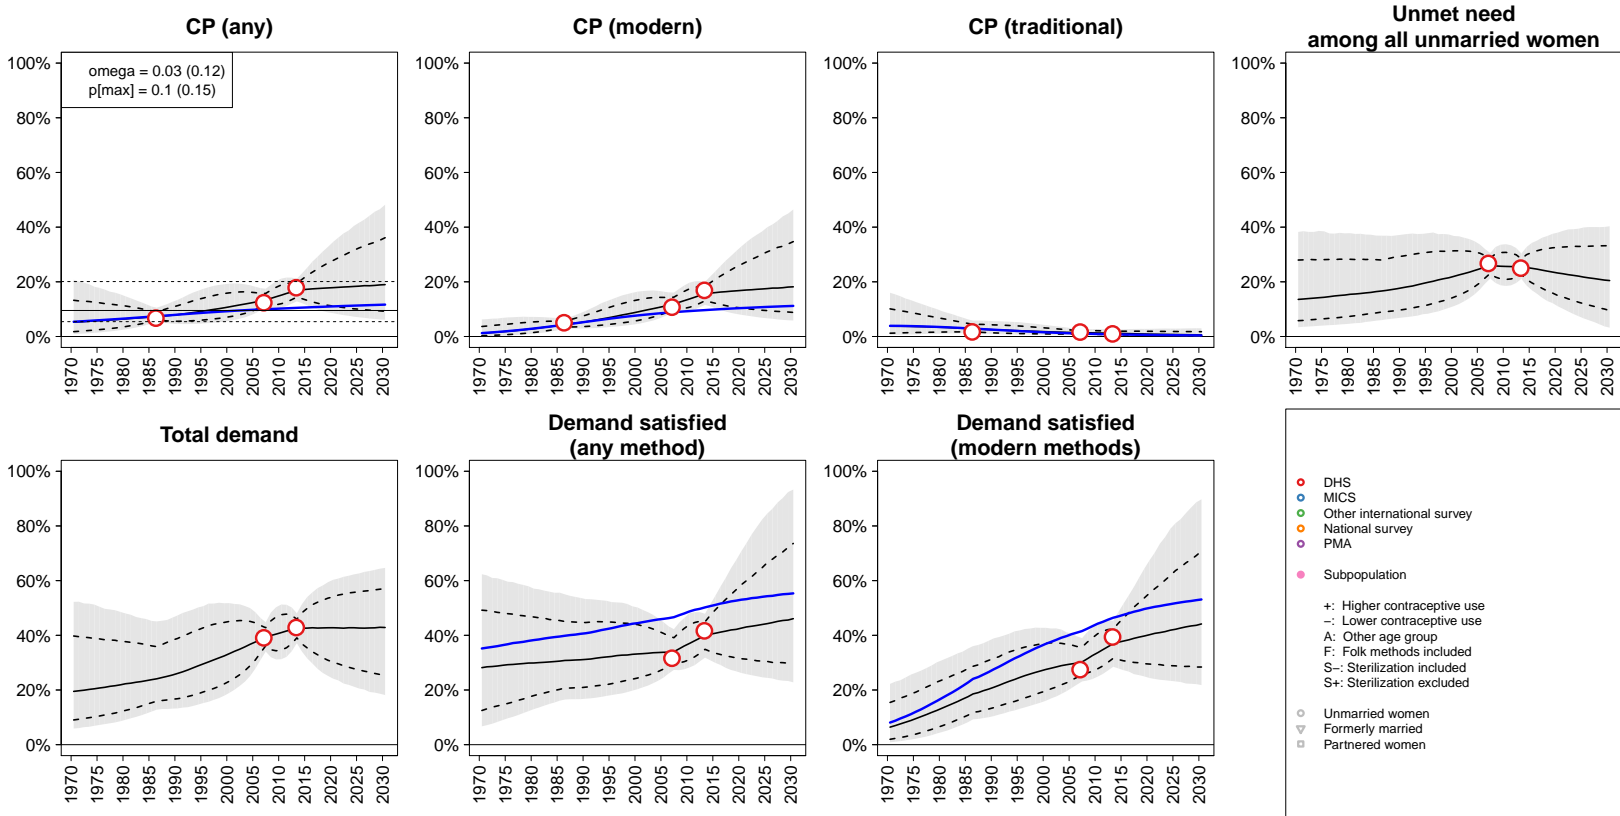

Madagascar (Eastern Africa, SA Group 1) ---- Unmarried / Not In-Union

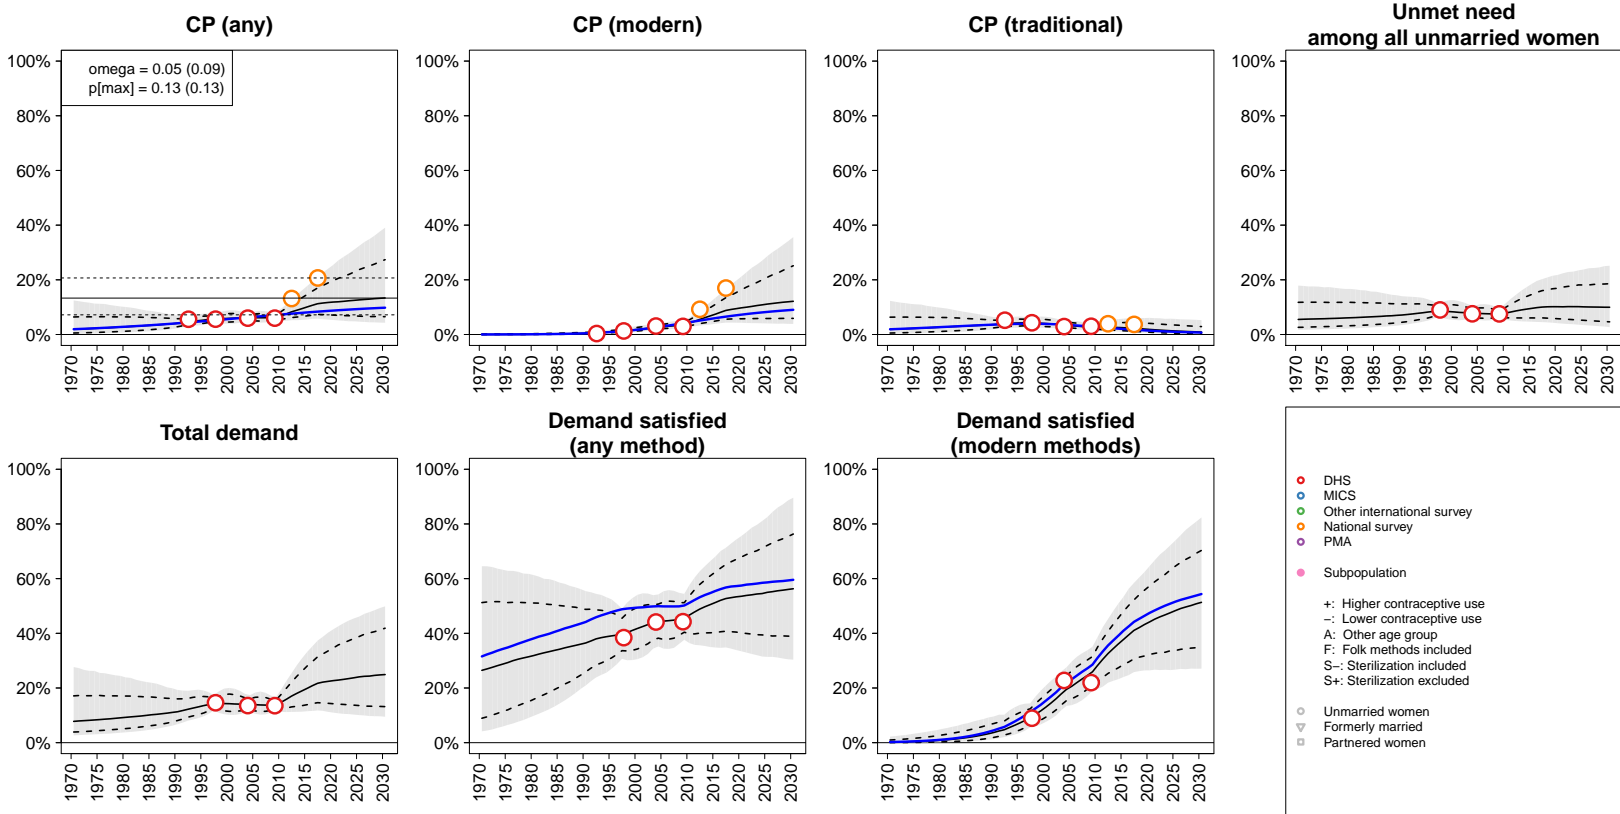

Malawi (Eastern Africa, SA Group 1) --- Unmarried / Not In-Union

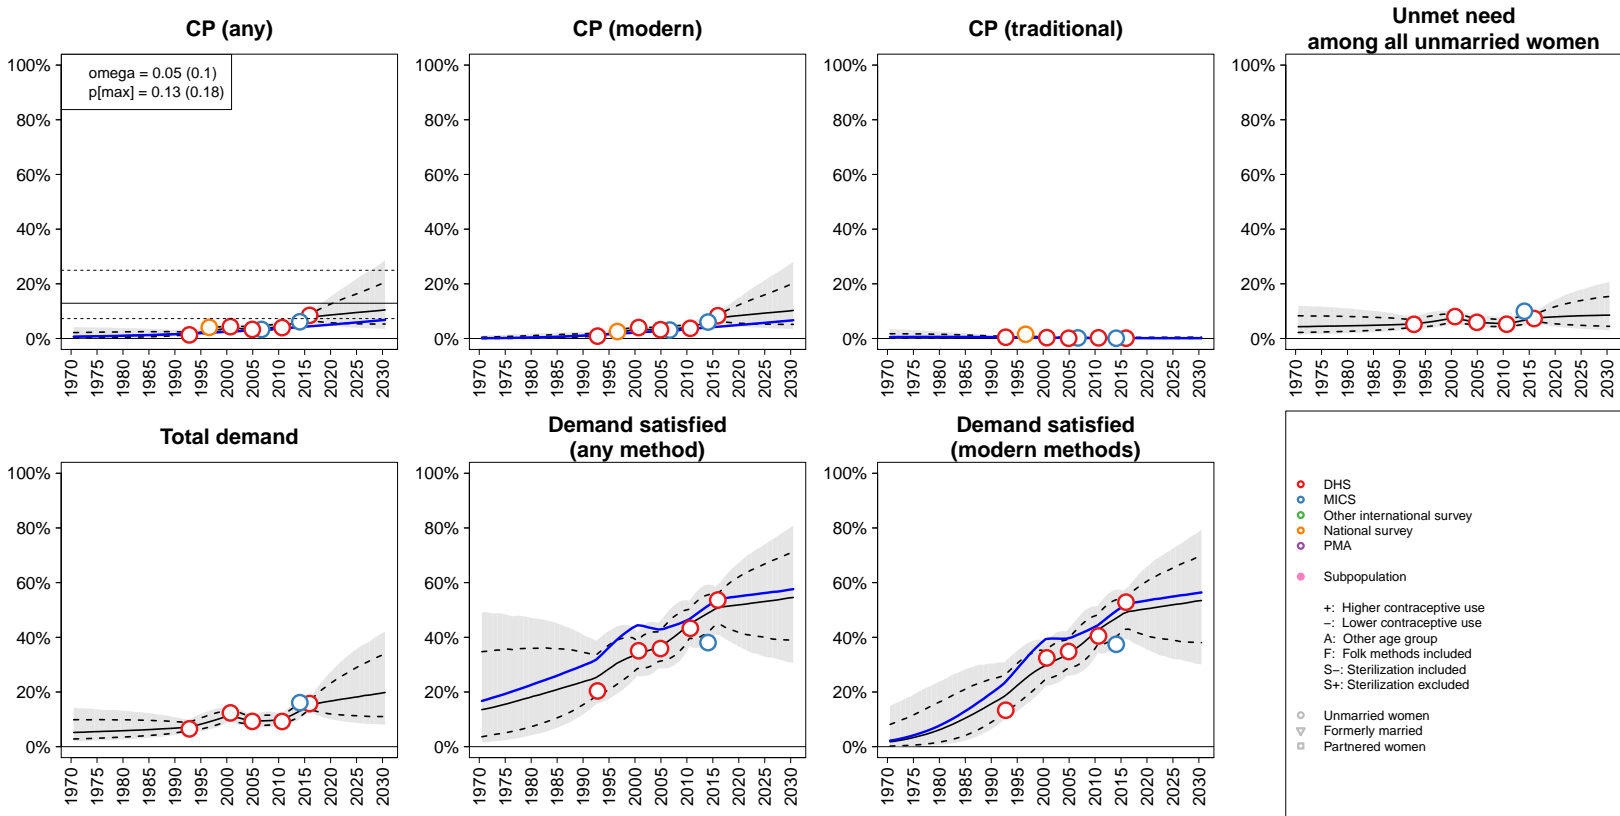

Mali (Western Africa, SA Group 1) --- Unmarried / Not In-Union

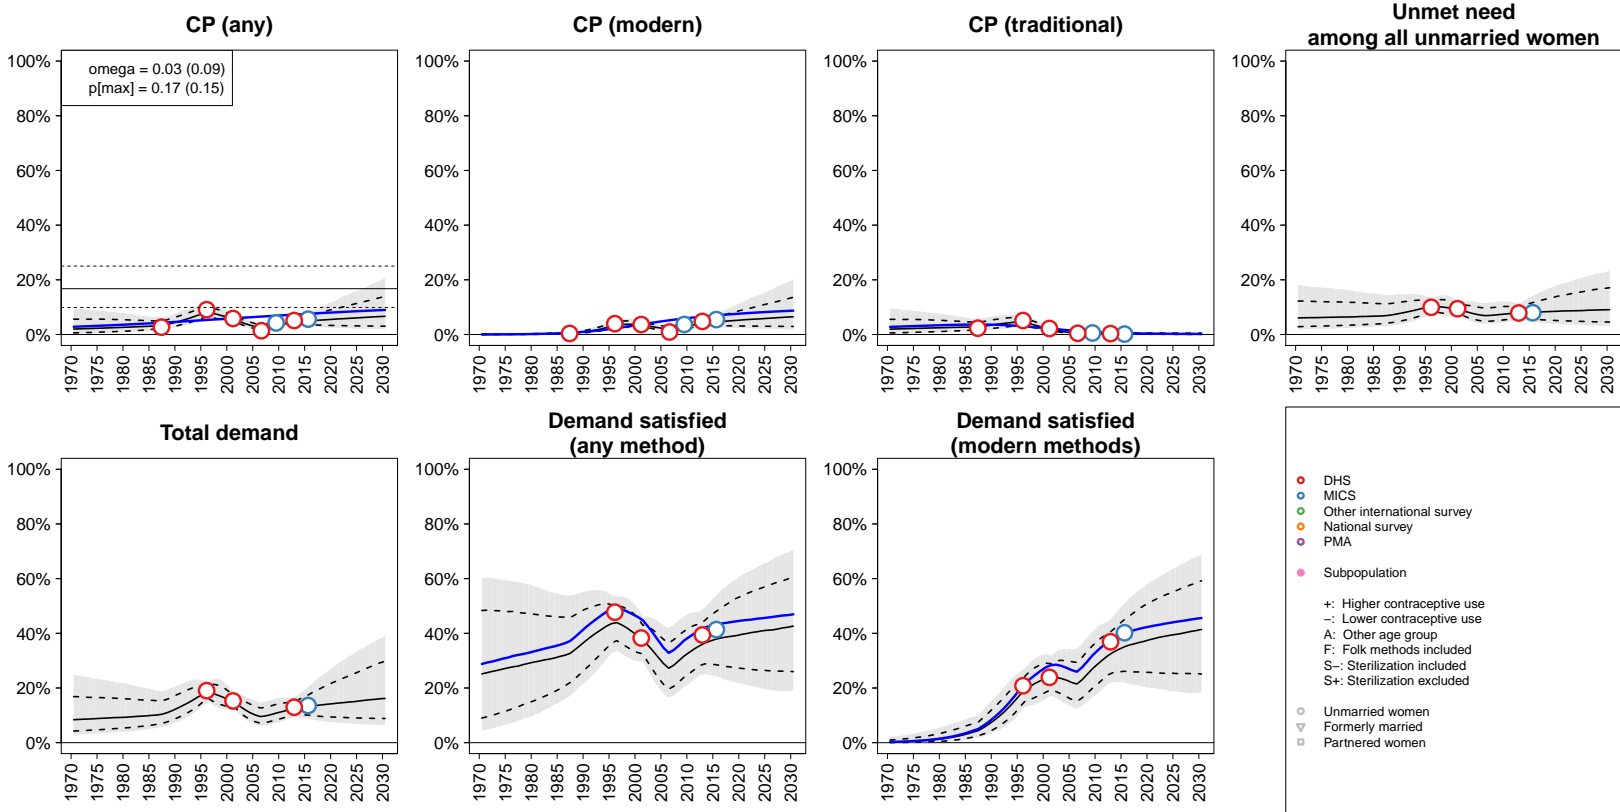

Mexico (Central America, SA Group 1) --- Unmarried / Not In-Union

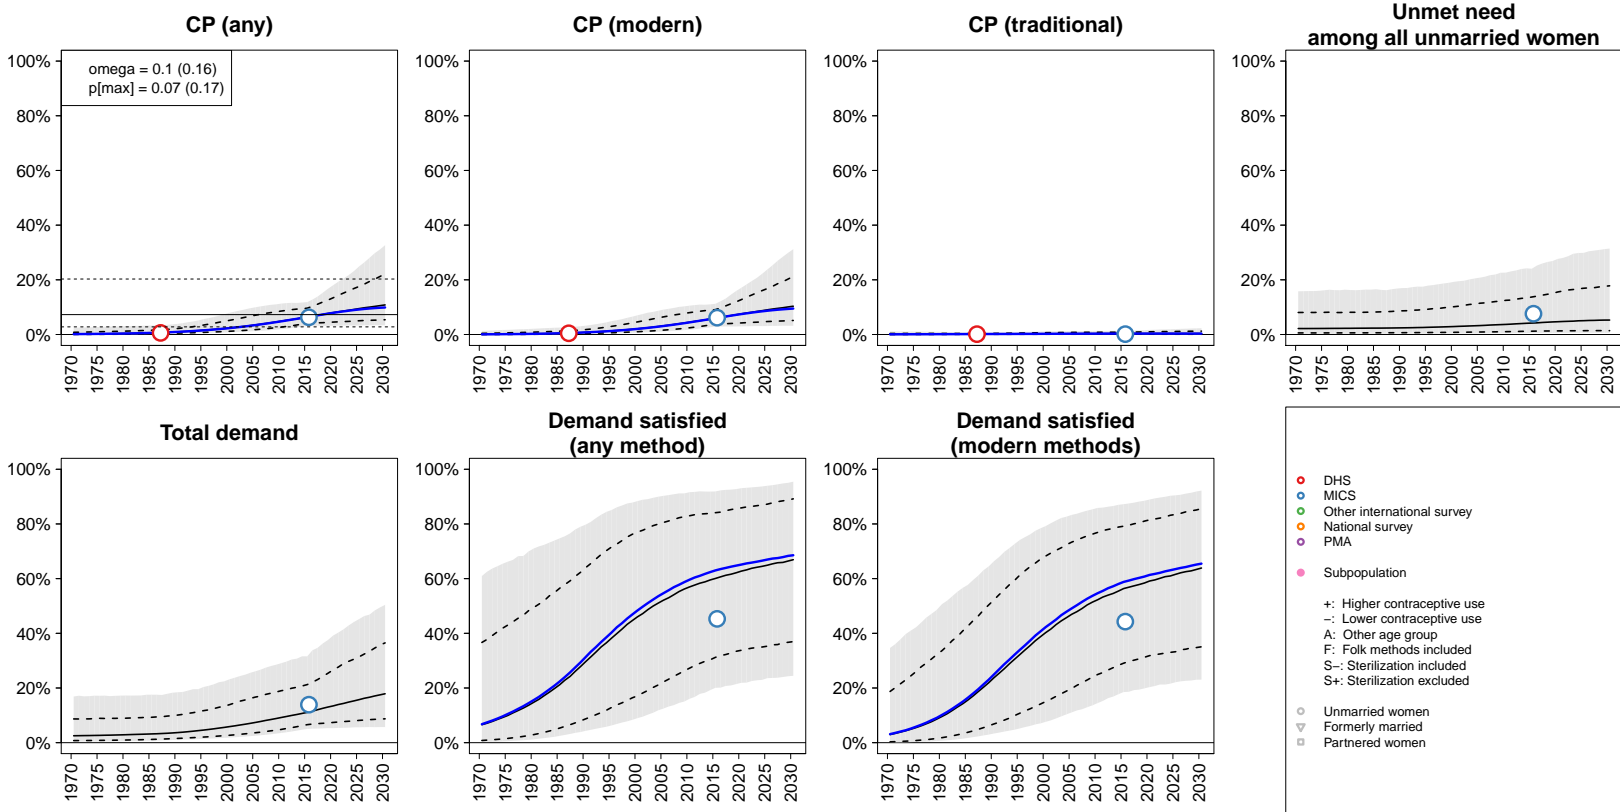



Mongolia (Eastern Asia, SA Group 1) --- Unmarried / Not In-Union

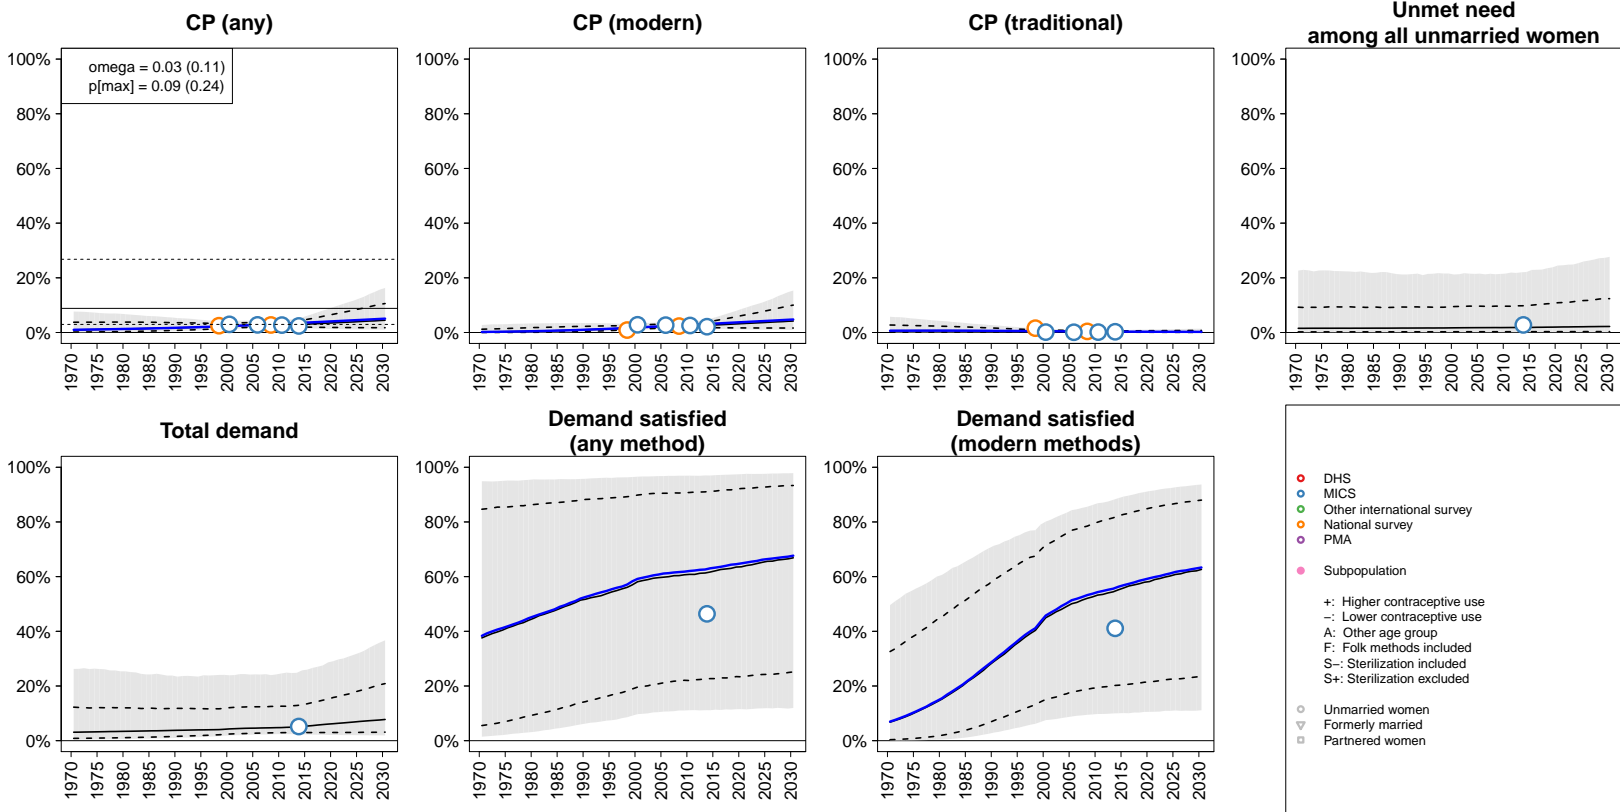

Montenegro (Southern Europe, SA Group 1) --- Unmarried / Not In-Union

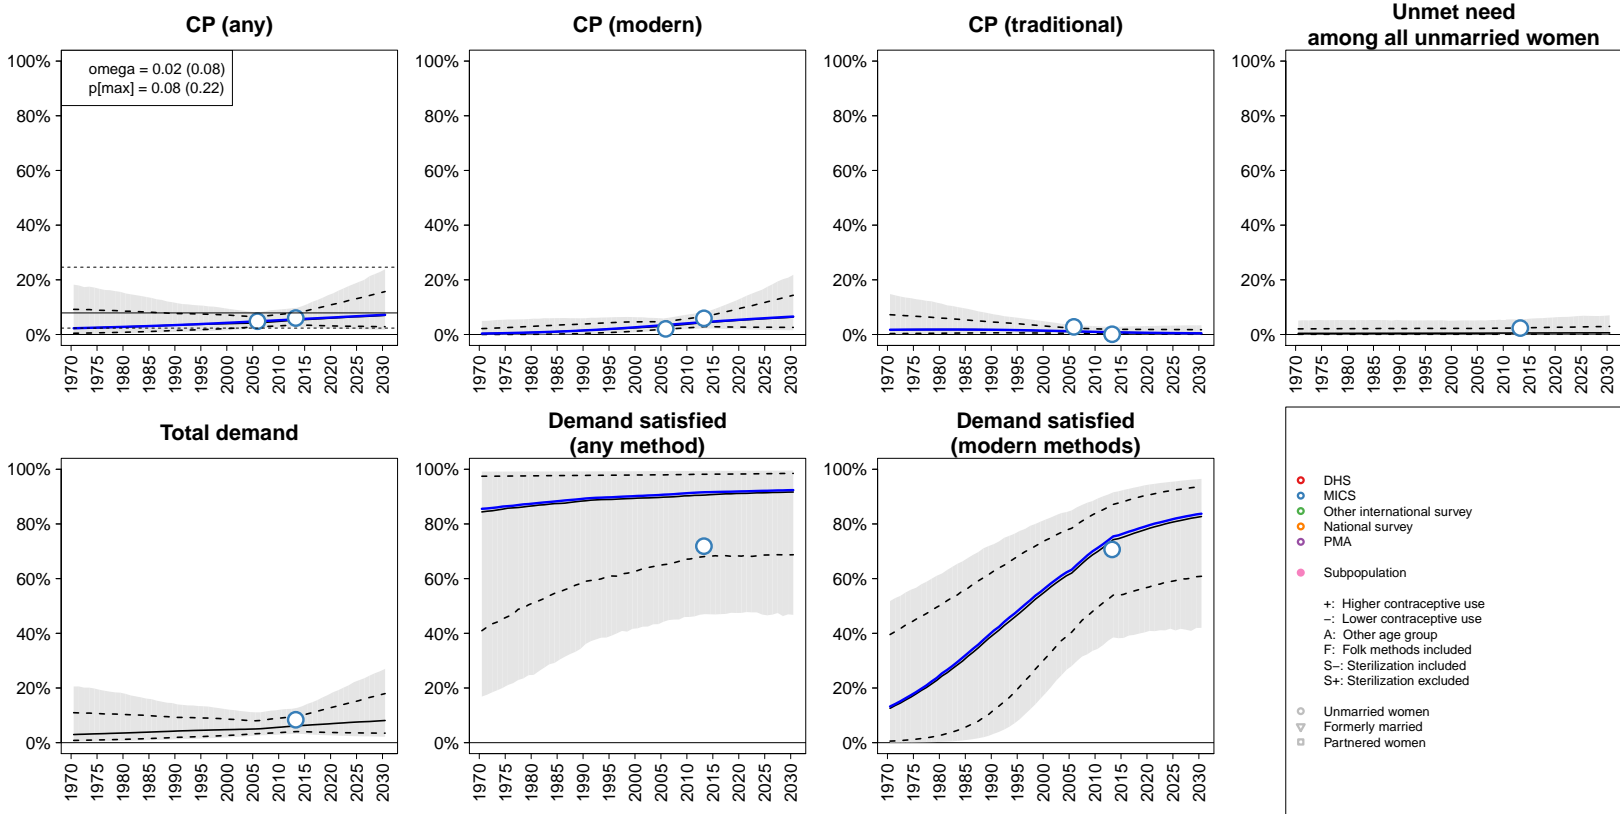

Mozambique (Eastern Africa, SA Group 1) --- Unmarried / Not In-Union

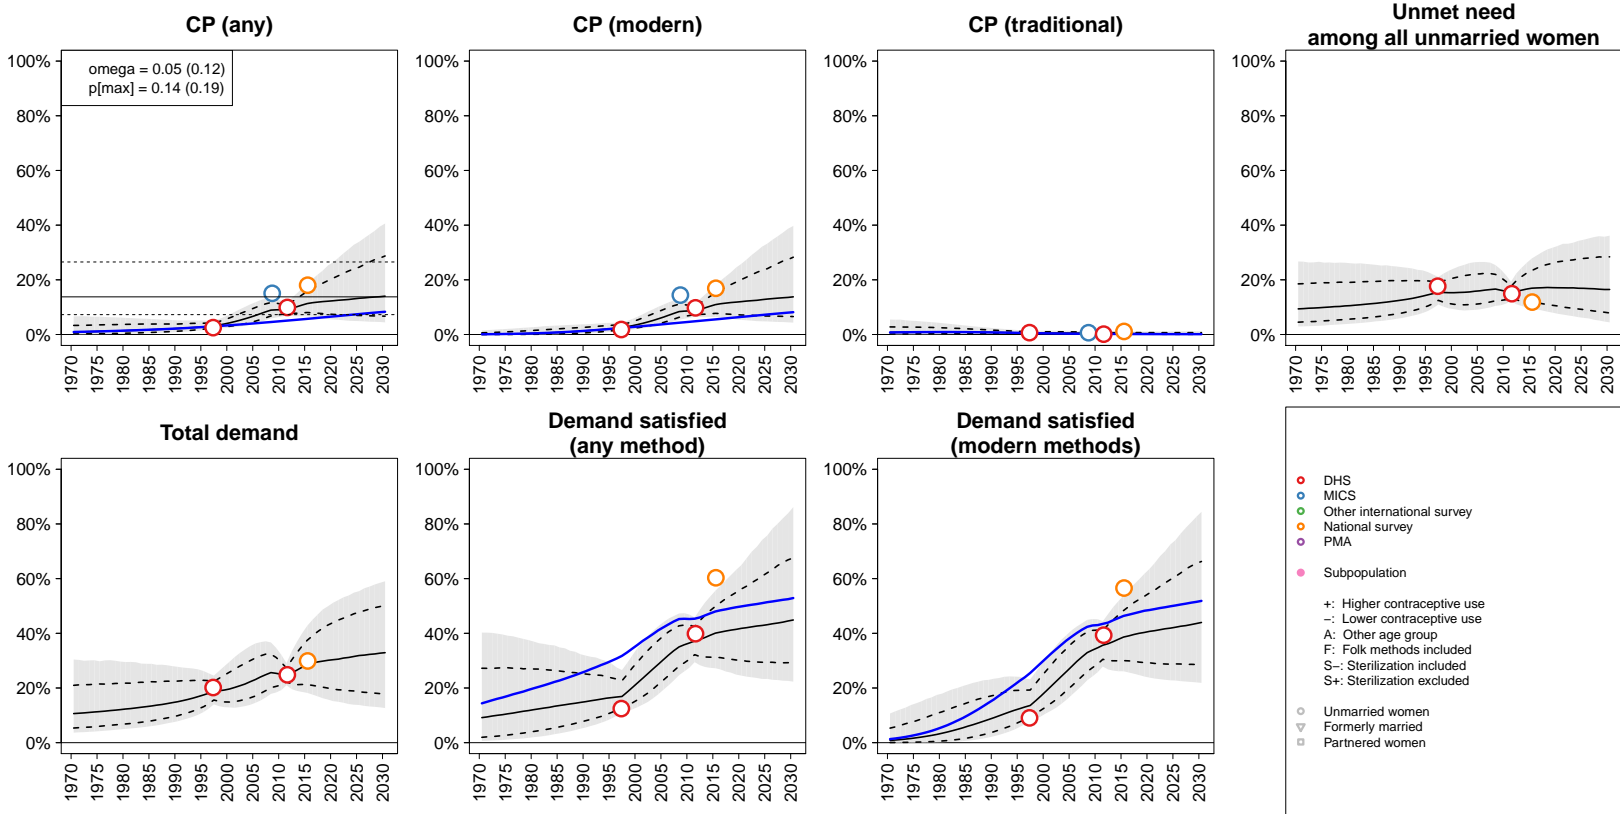

Namibia (Southern Africa, SA Group 1) --- Unmarried / Not In-Union

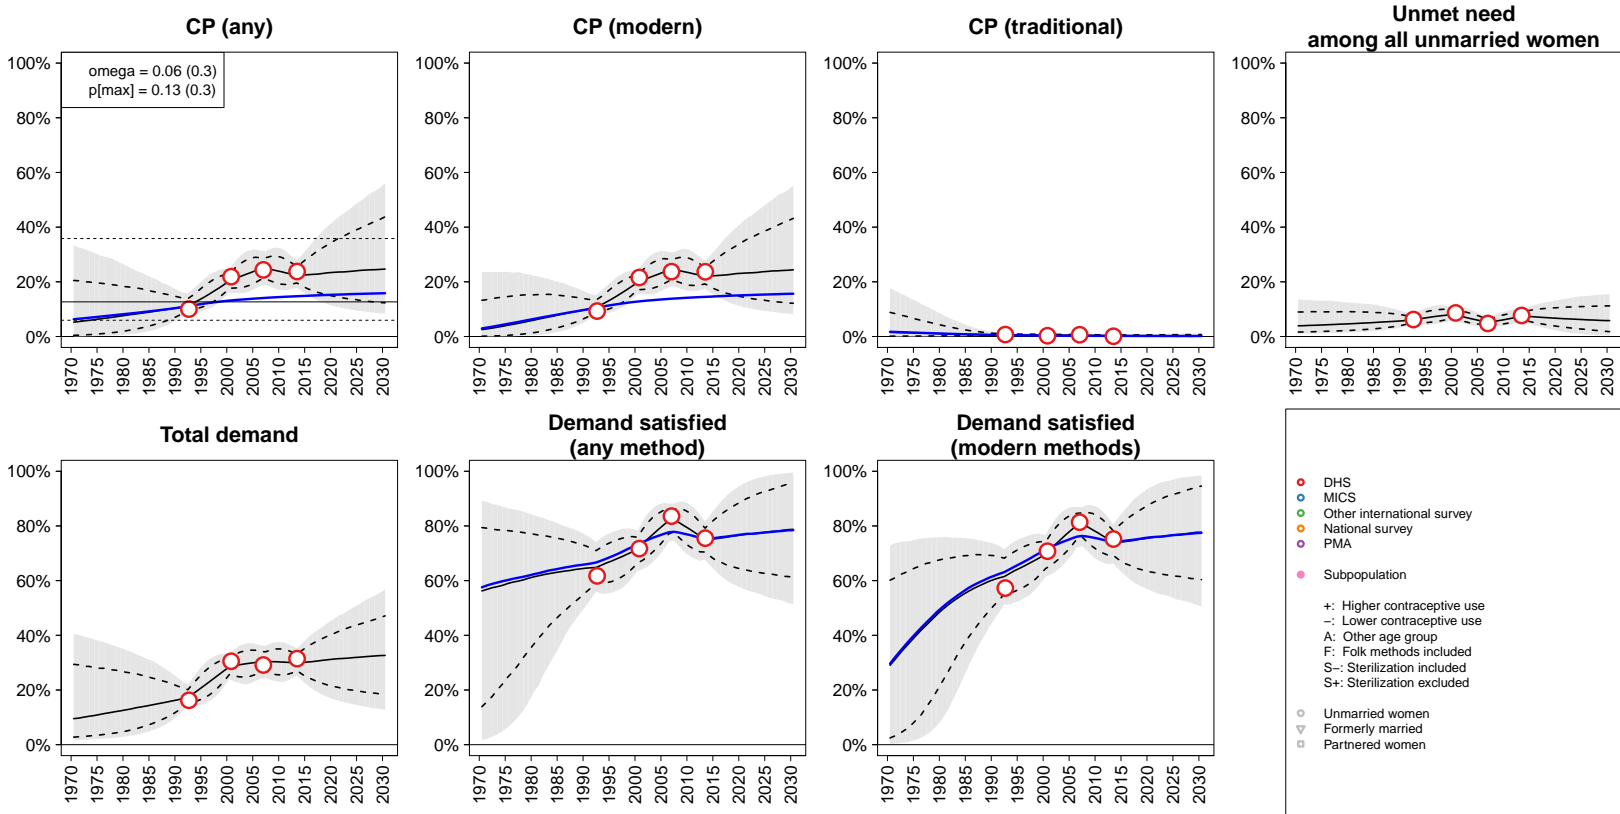

Nepal (Southern Asia, SA Group 0) --- Unmarried / Not In-Union

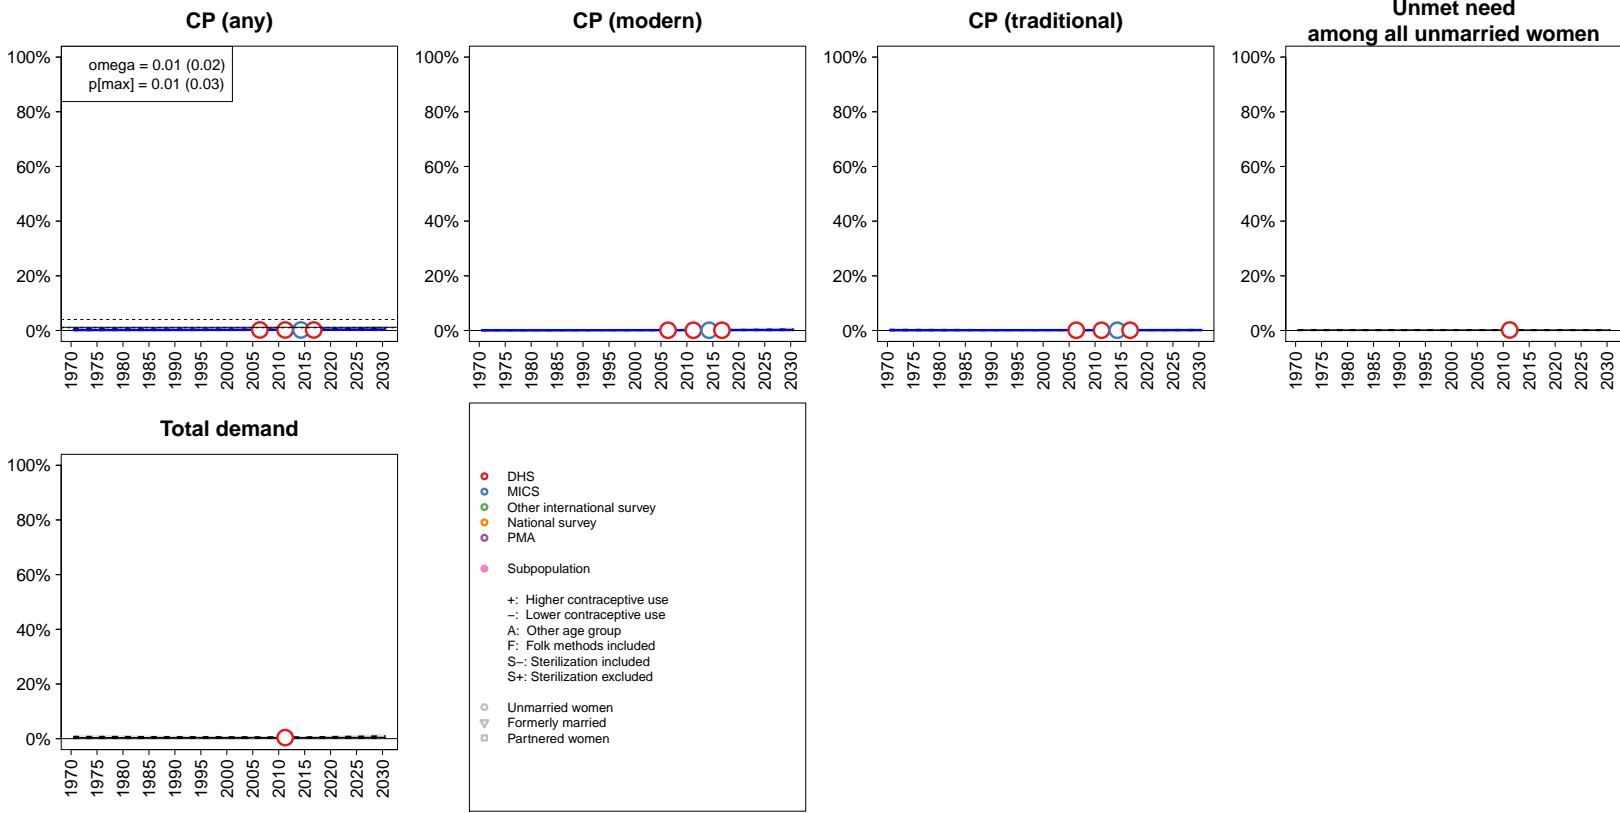

Nicaragua (Central America, SA Group 1) --- Unmarried / Not In-Union

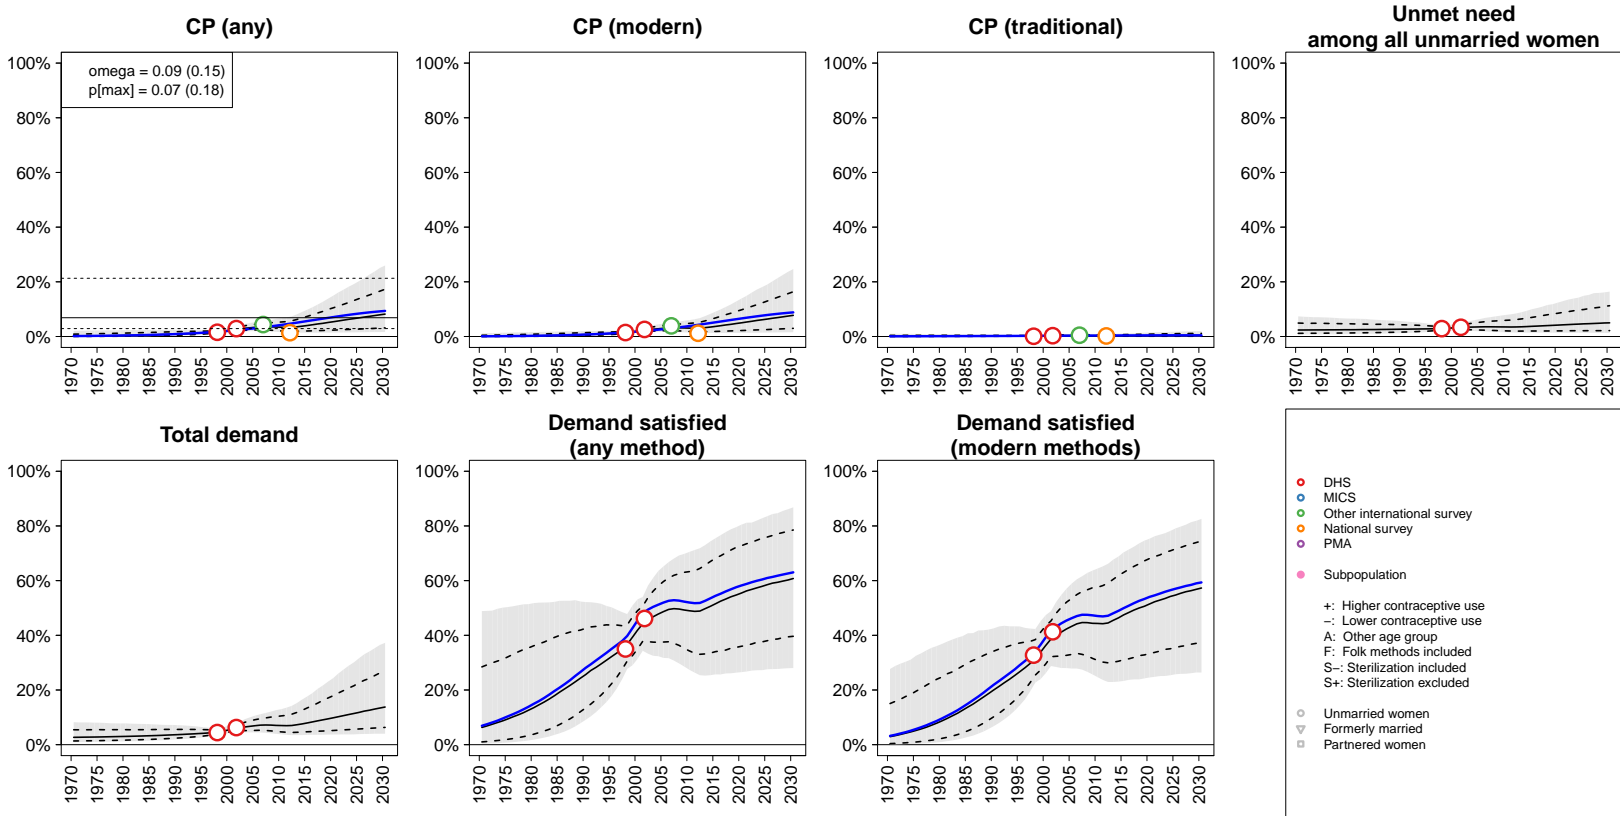

Niger (Western Africa, SA Group 0) --- Unmarried / Not In-Union

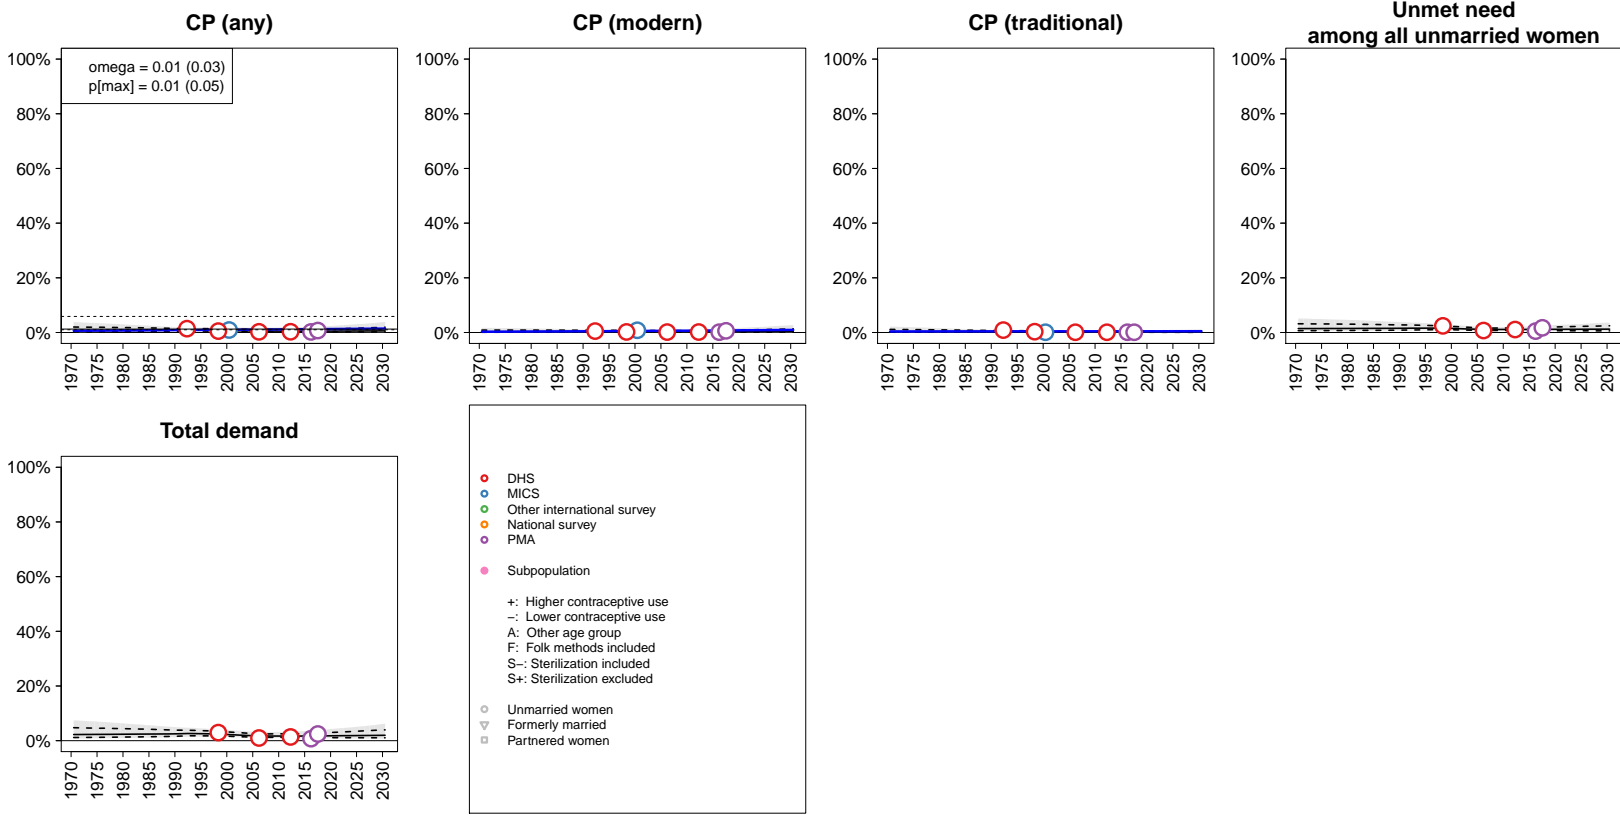

Nigeria (Western Africa, SA Group 1) --- Unmarried / Not In-Union

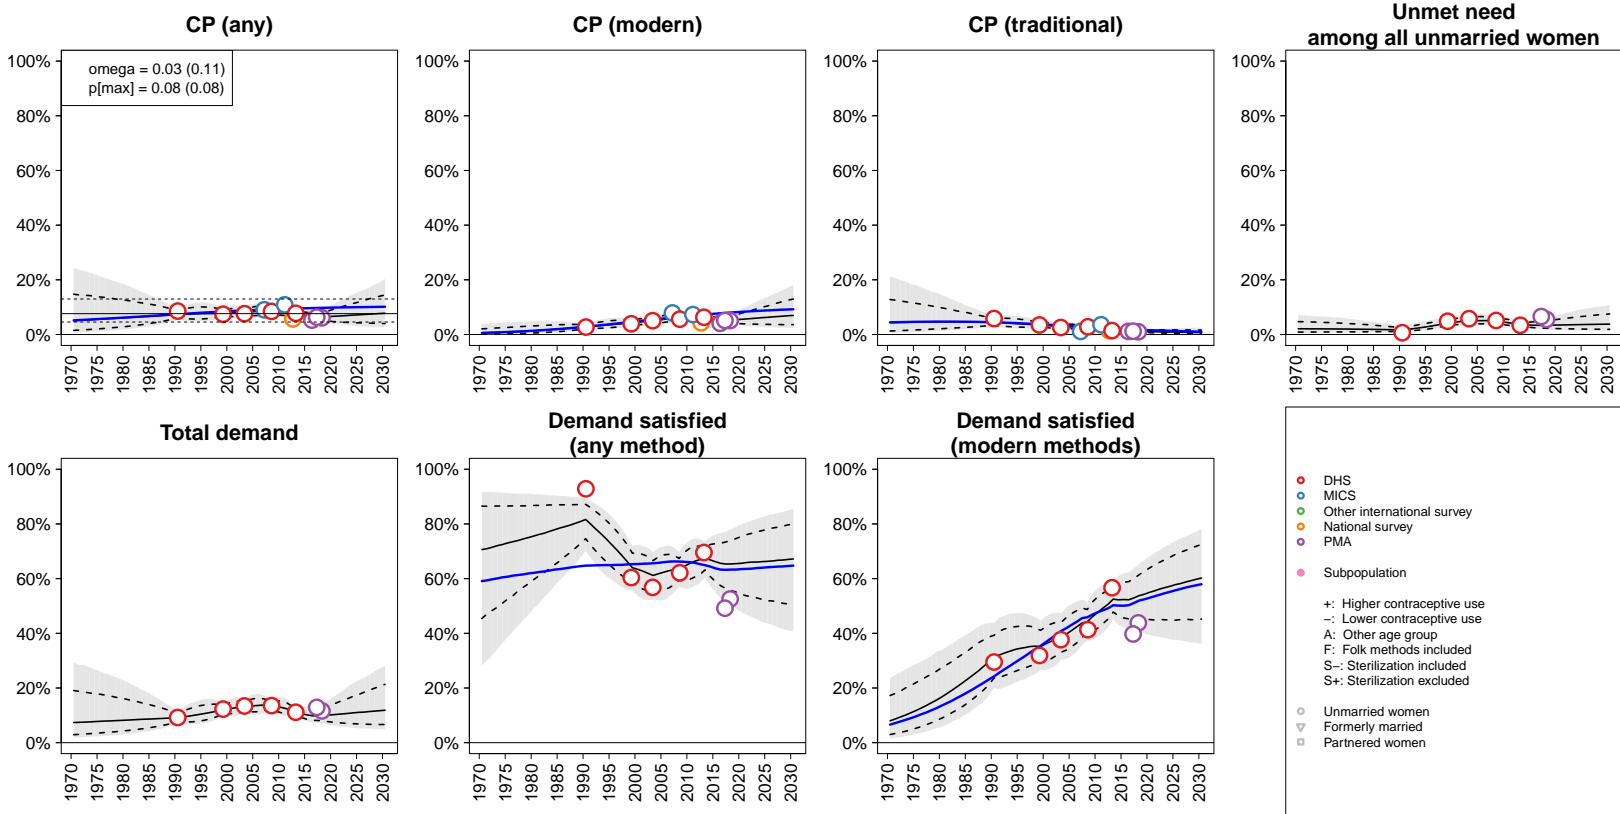



Papua New Guinea (Melanesia, SA Group 1) — Unmarried / Not In-Union

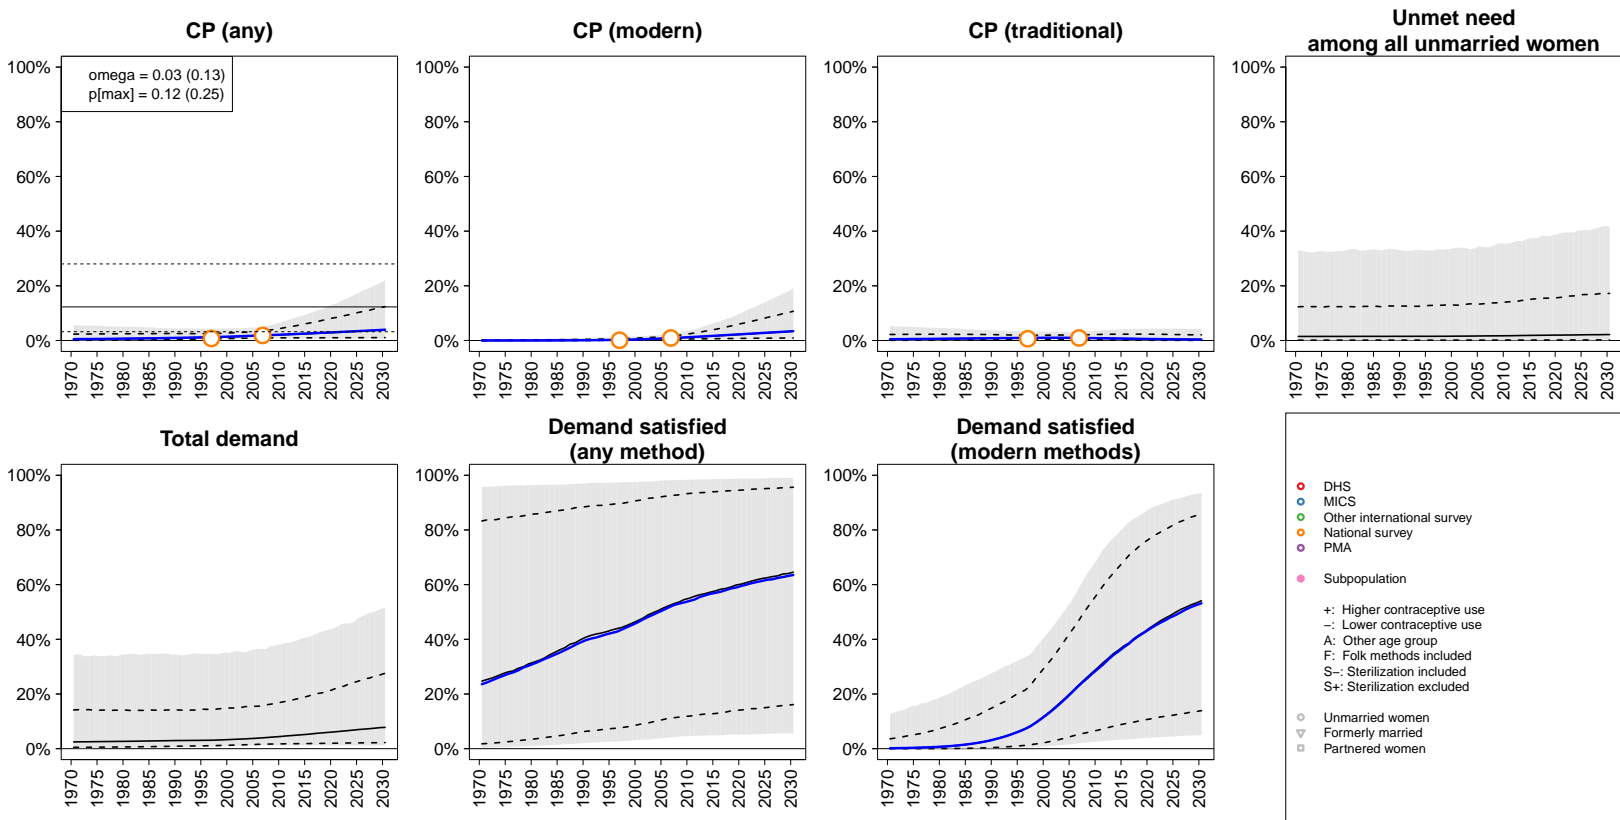

Paraguay (South America, SA Group 1) --- Unmarried / Not In-Union

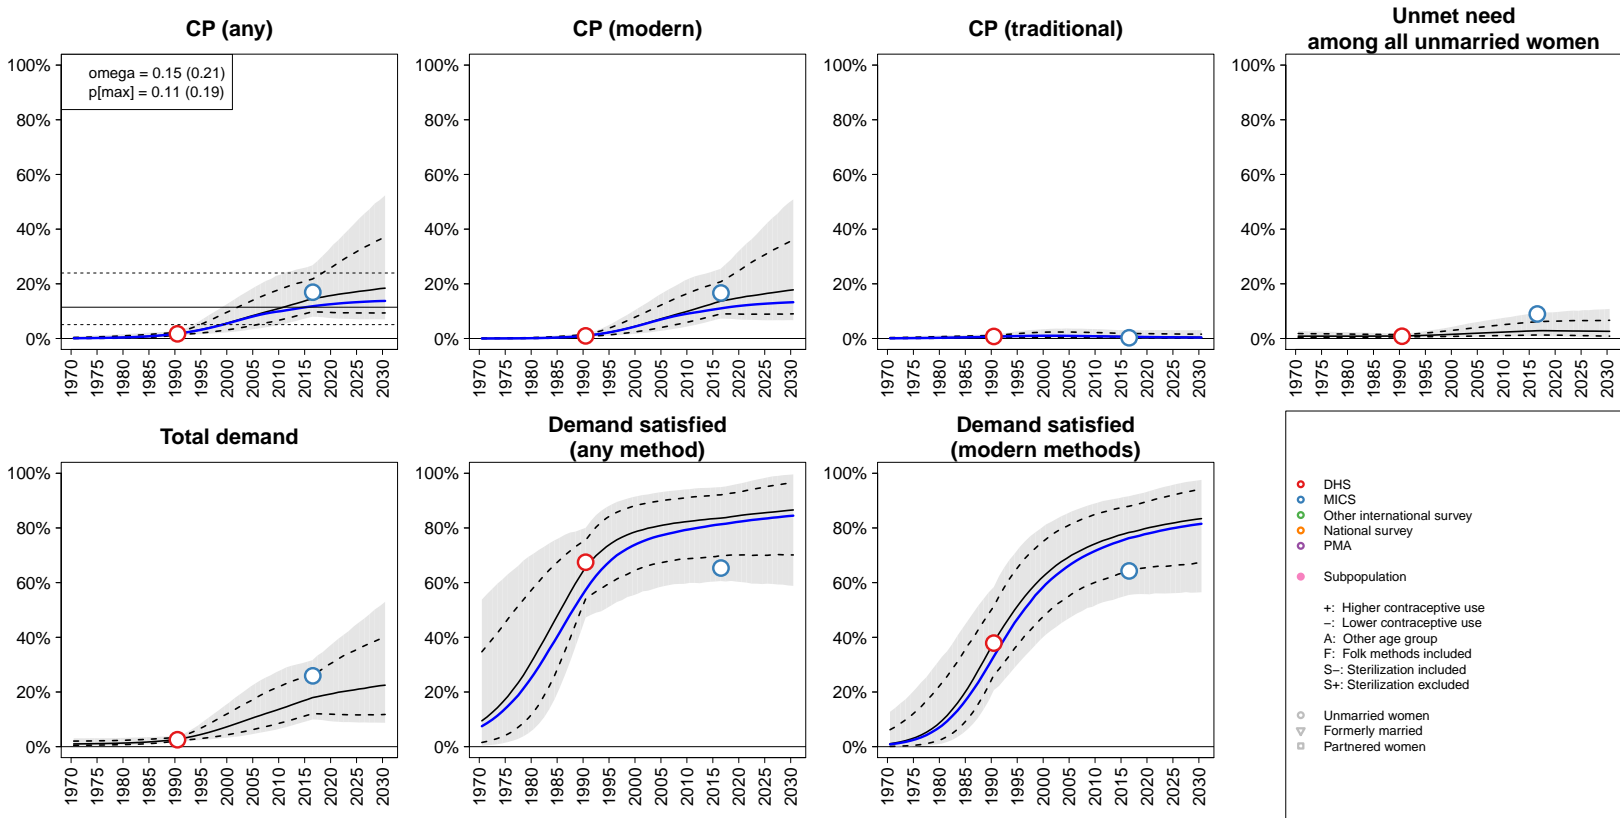

Peru (South America, SA Group 1) --- Unmarried / Not In-Union

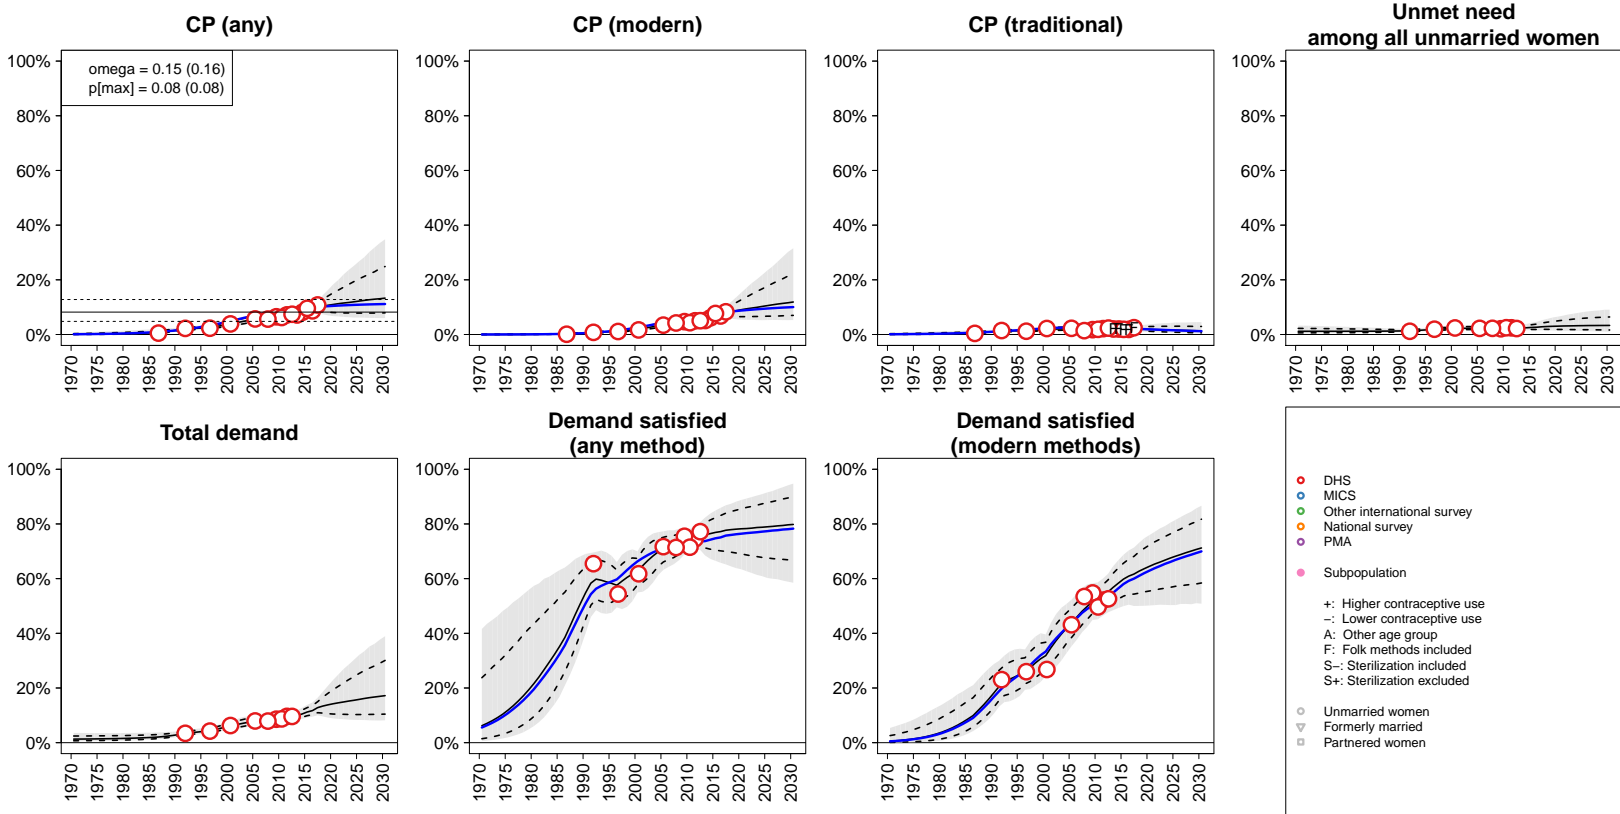

Philippines (South-eastern Asia, SA Group 1) --- Unmarried / Not In-Union

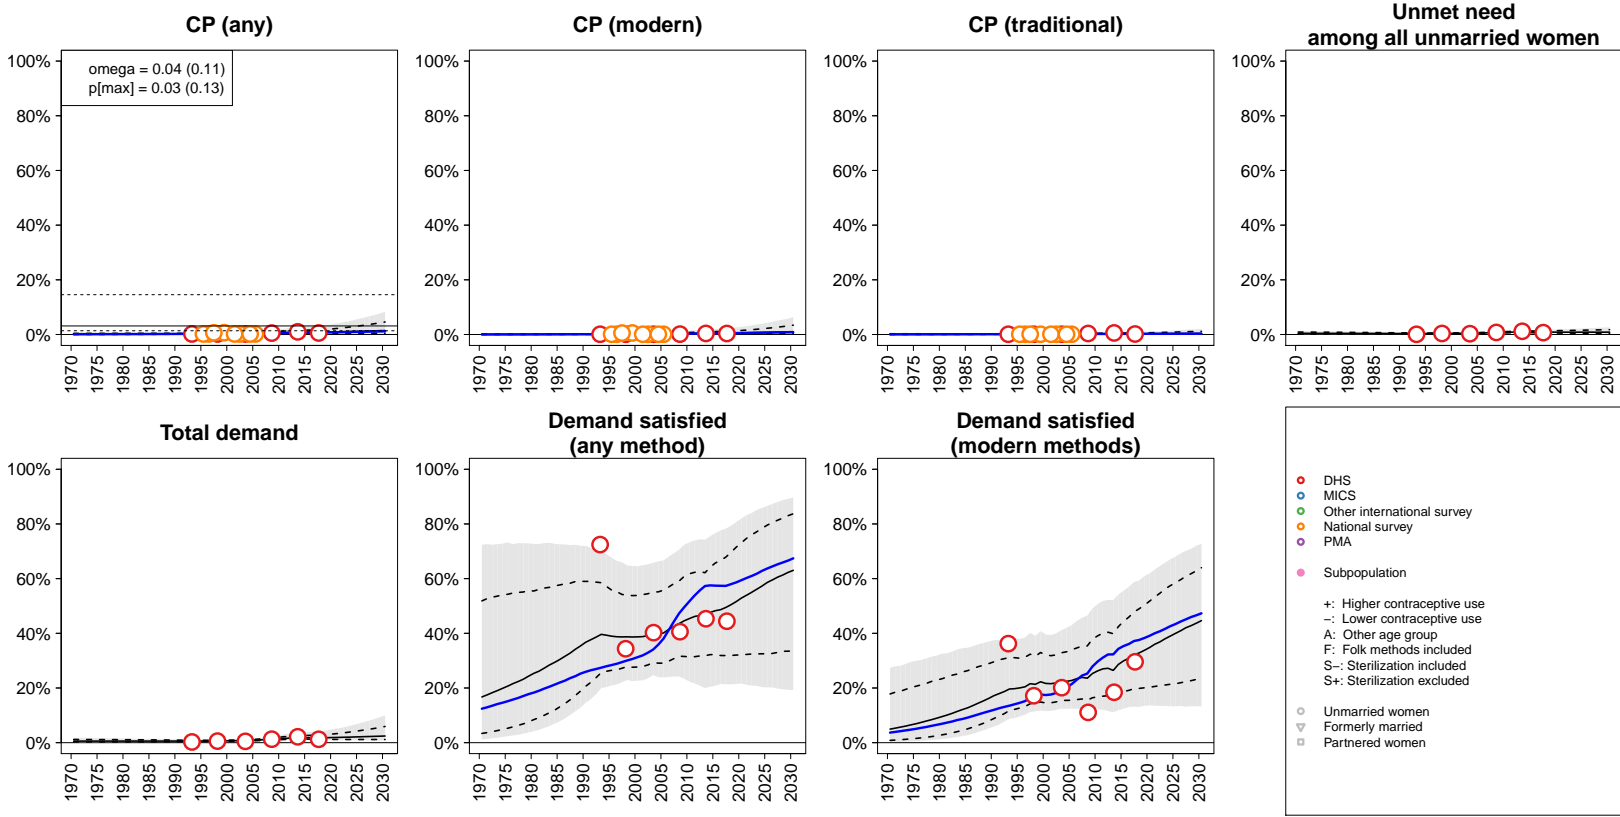

Republic of Moldova (Eastern Europe, SA Group 1) --- Unmarried / Not In-Union

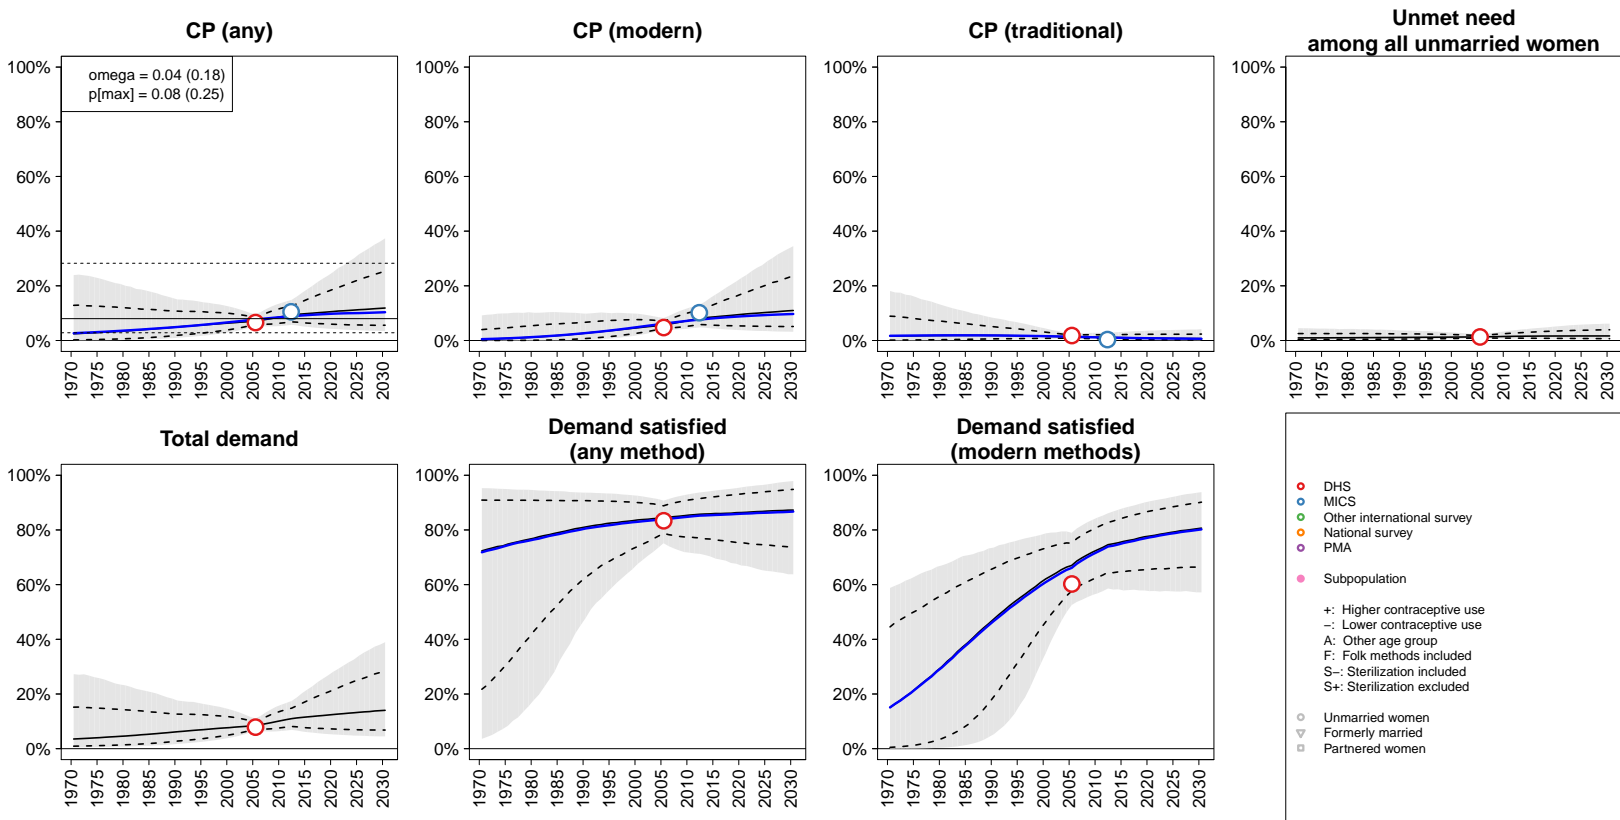

Rwanda (Eastern Africa, SA Group 1) --- Unmarried / Not In-Union

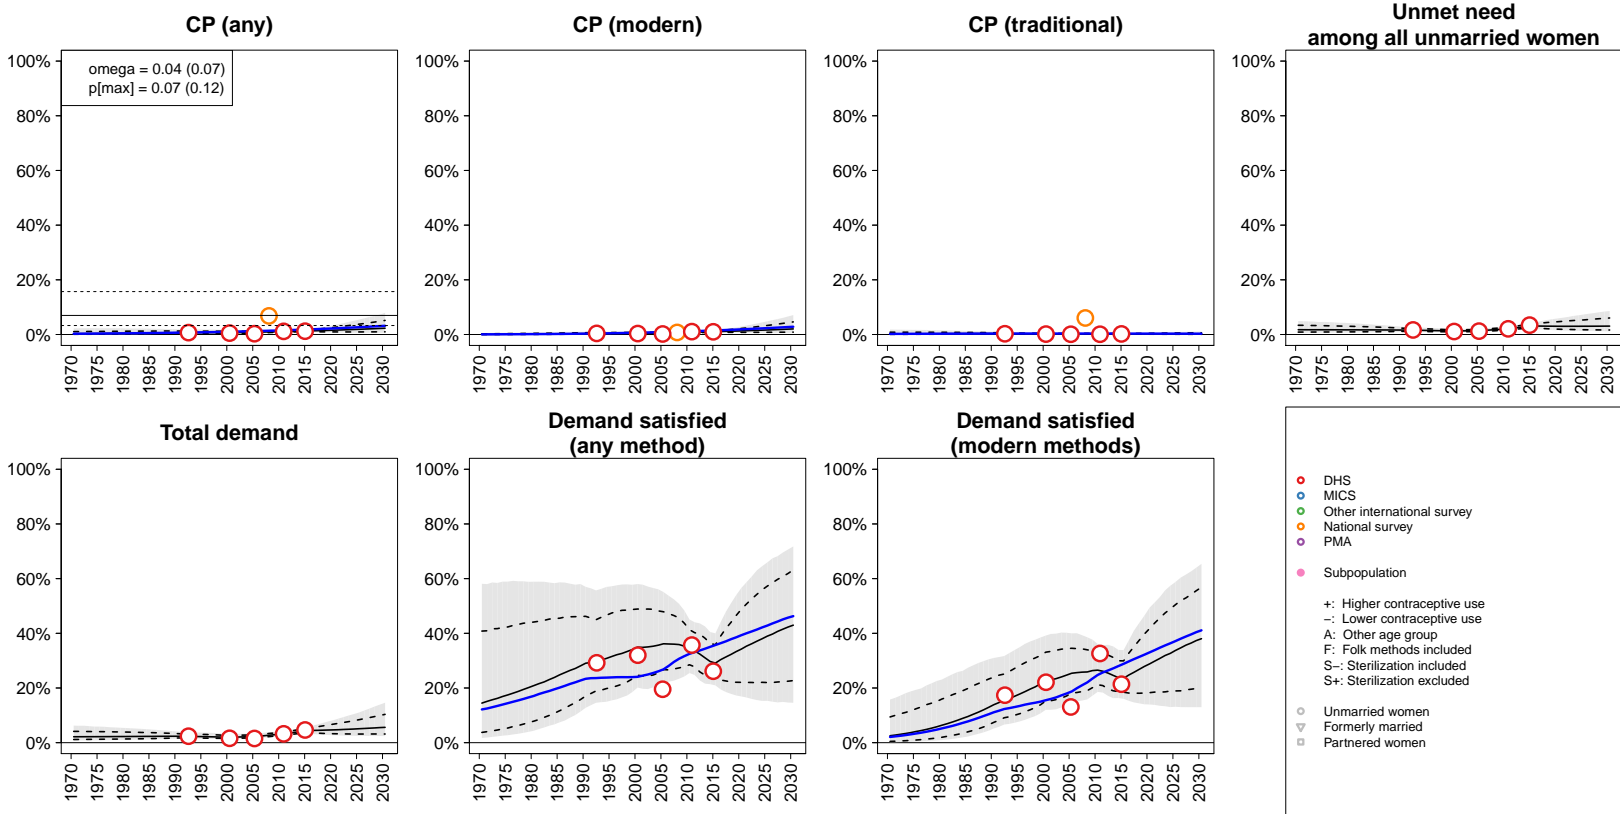

Samoa (Polynesia, SA Group 1) --- Unmarried / Not In-Union

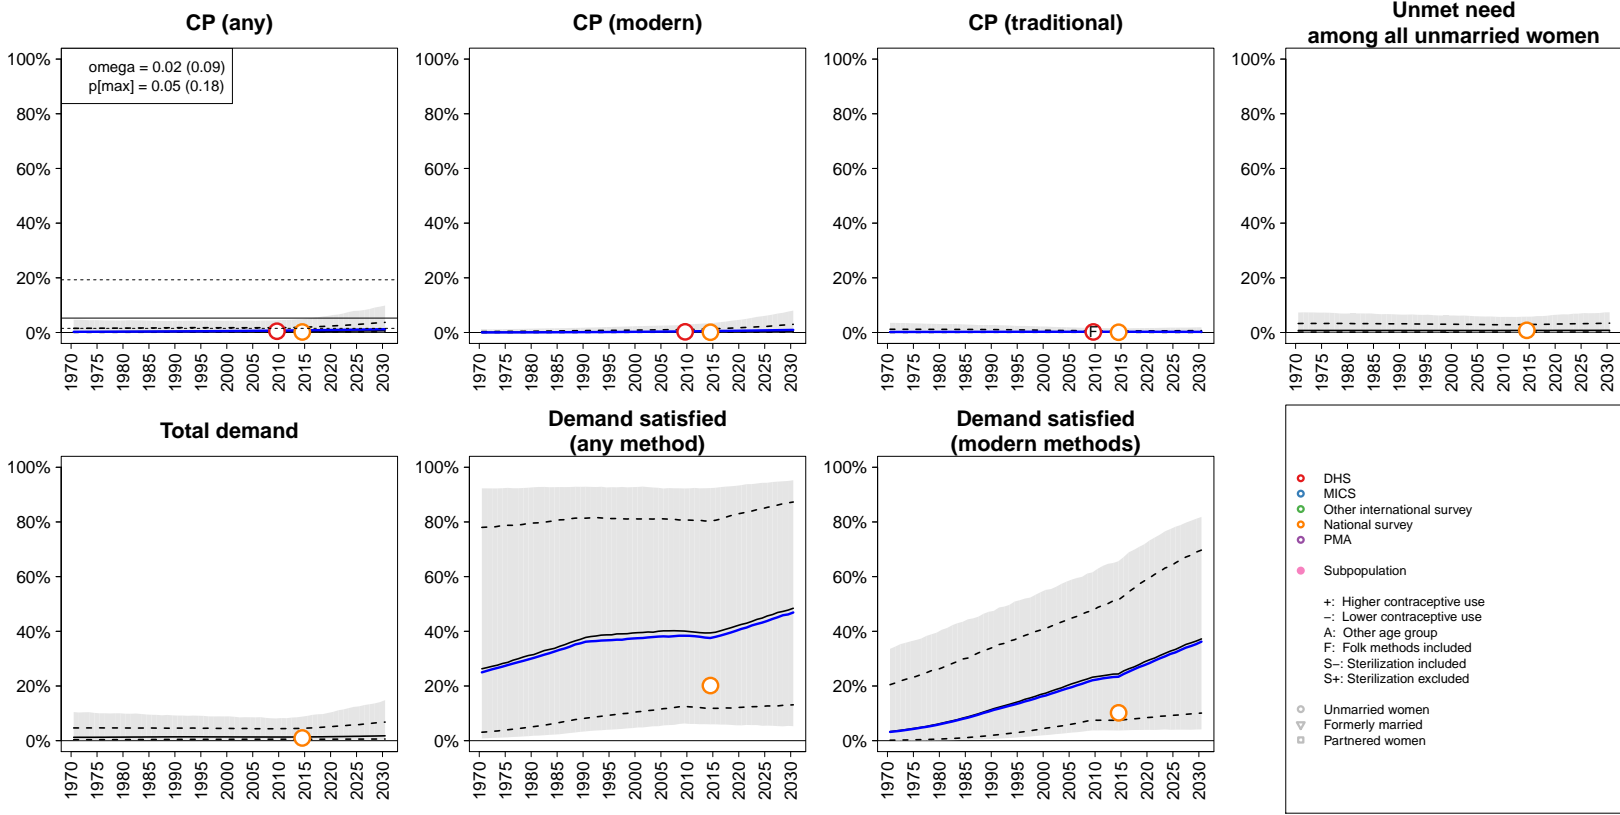

Sao Tome and Principe (Middle Africa, SA Group 1) --- Unmarried / Not In-Union

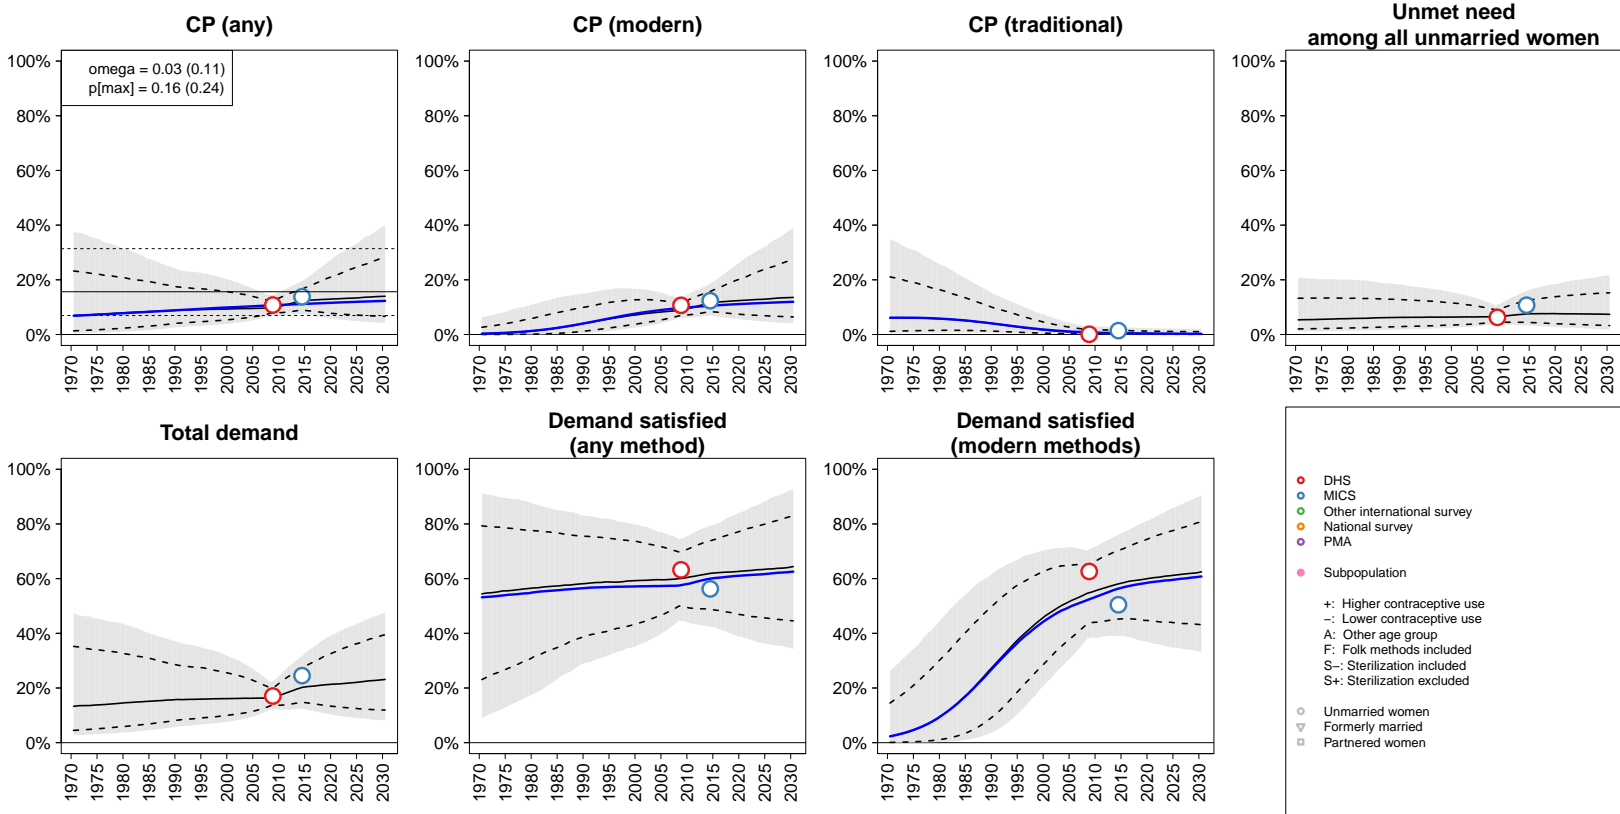



Senegal (Western Africa, SA Group 1) --- Unmarried / Not In-Union

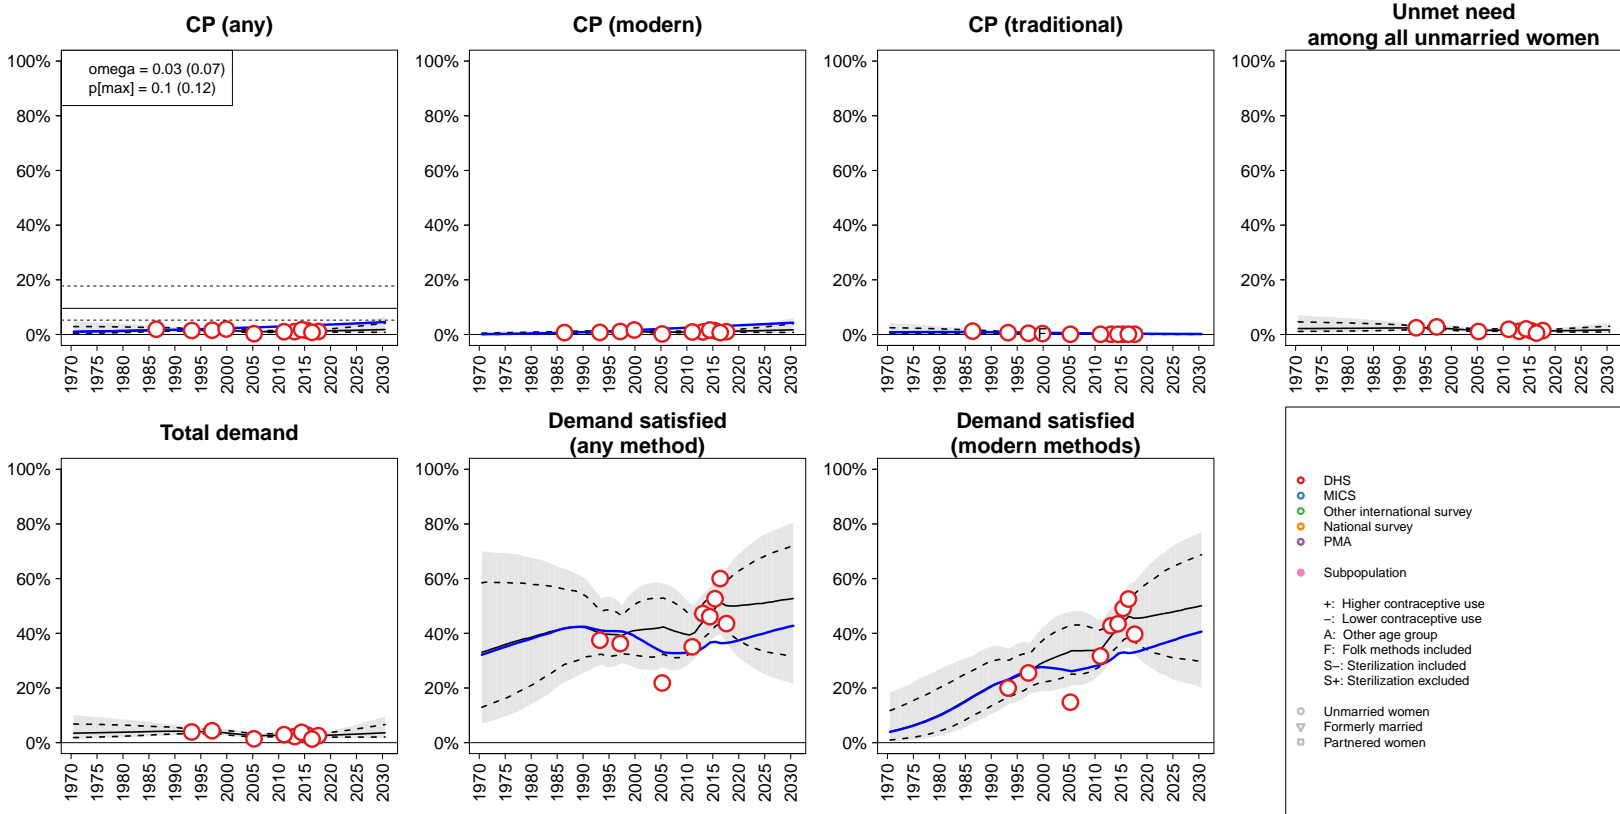

Serbia (Southern Europe, SA Group 1) --- Unmarried / Not In-Union

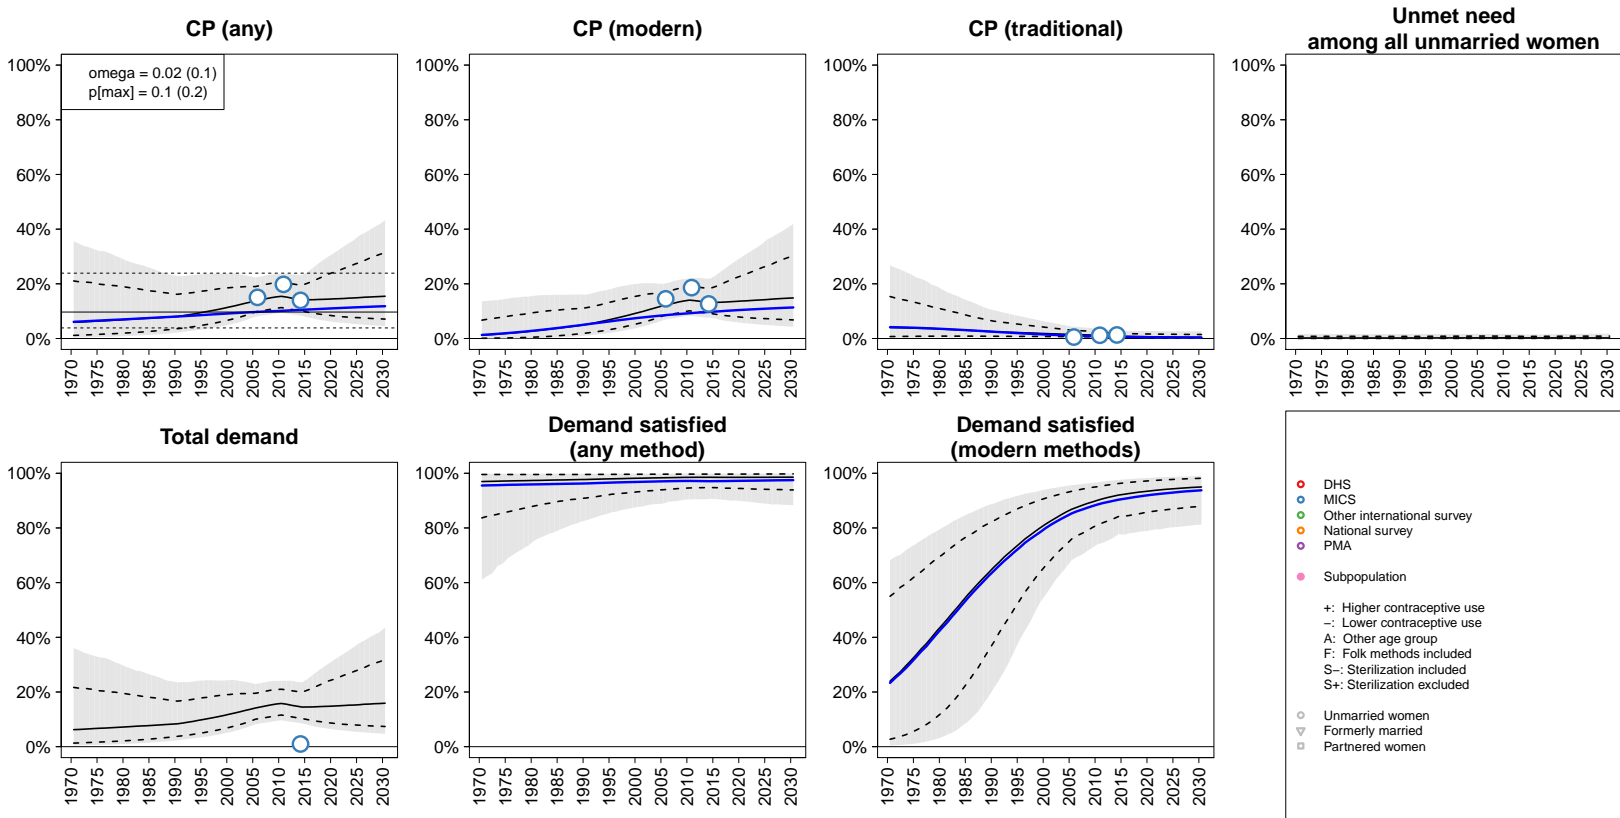

Sierra Leone (Western Africa, SA Group 1) --- Unmarried / Not In-Union

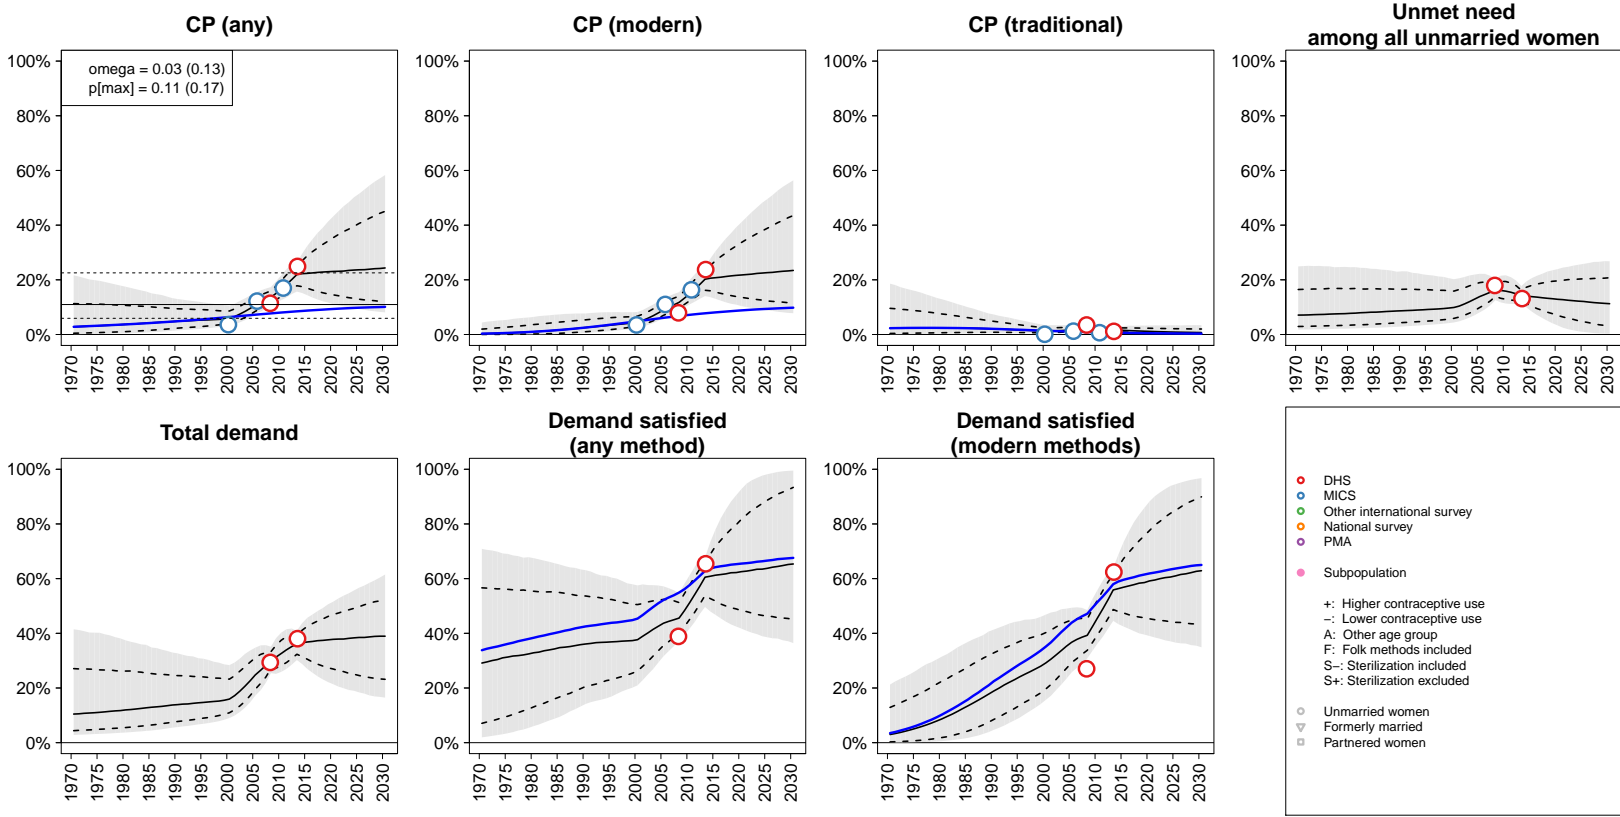

Solomon Islands (Melanesia, SA Group 1) — Unmarried / Not In-Union

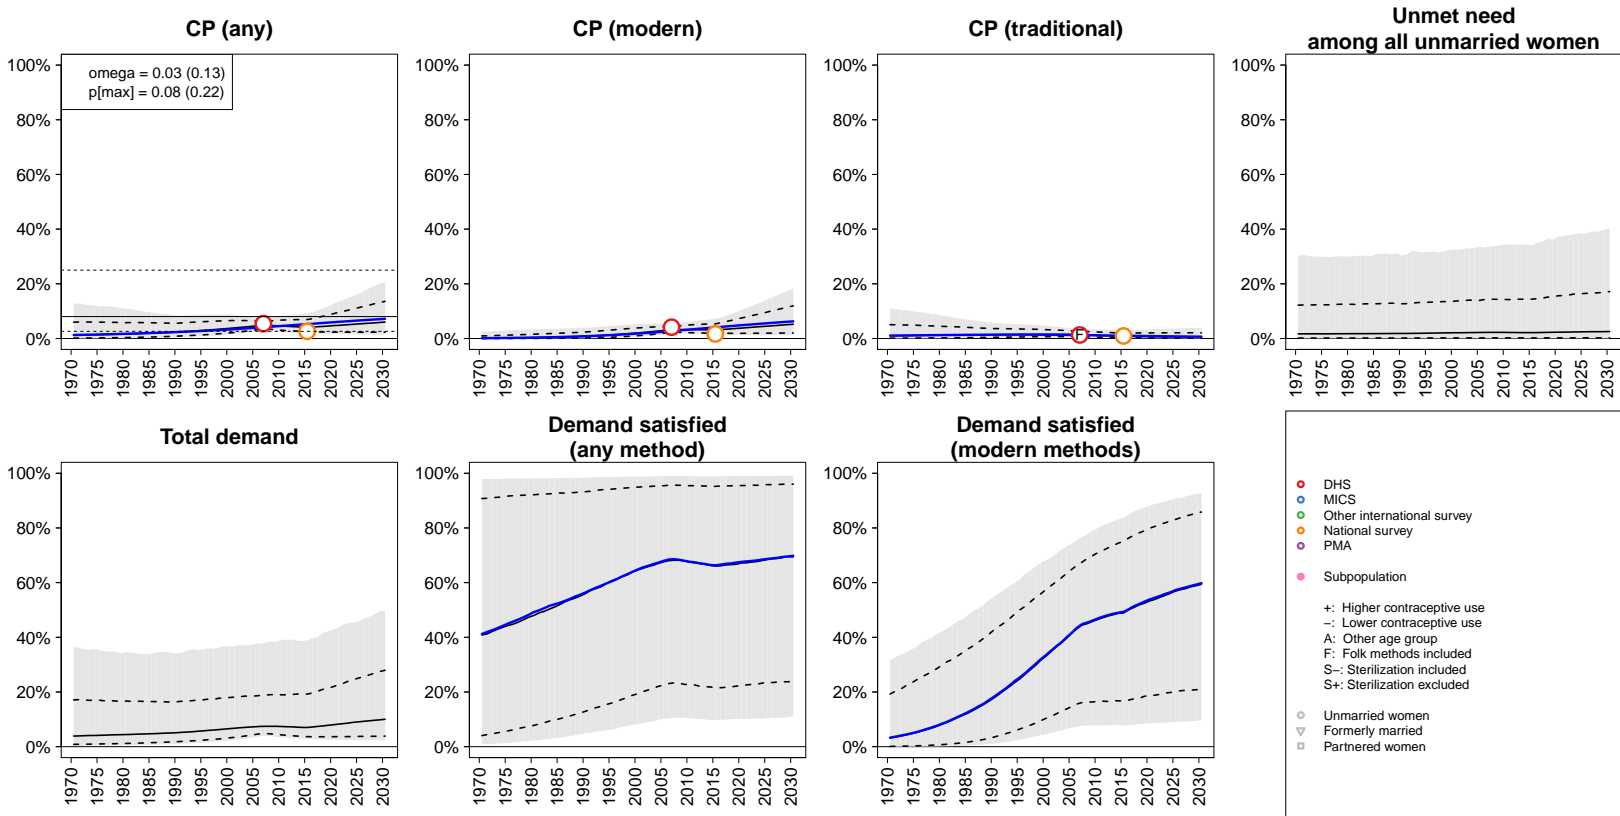

South Africa (Southern Africa, SA Group 1) --- Unmarried / Not In-Union

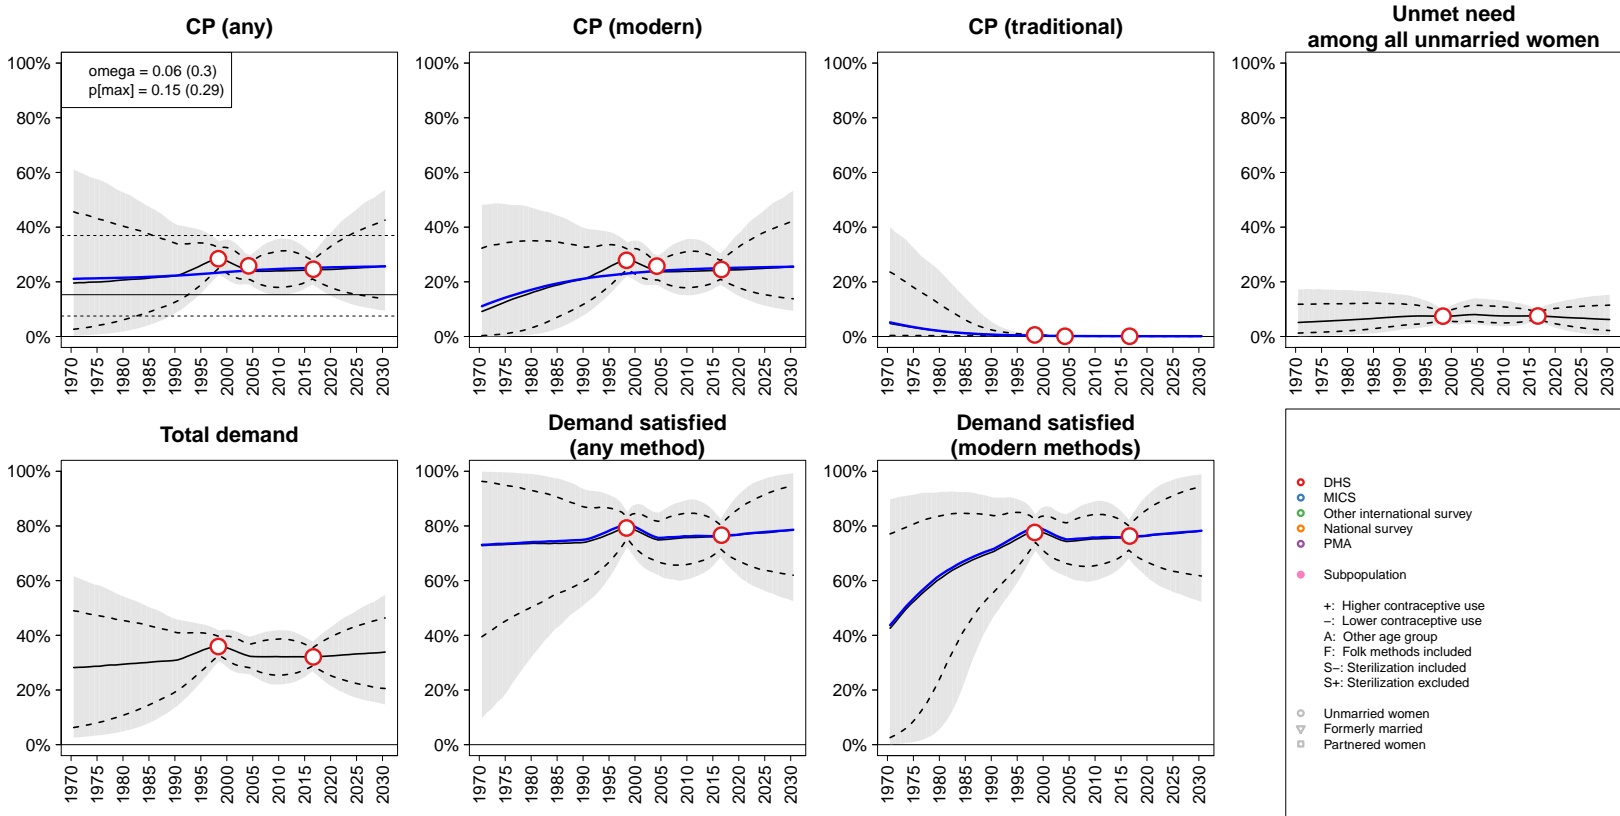

Suriname (South America, SA Group 1) --- Unmarried / Not In-Union

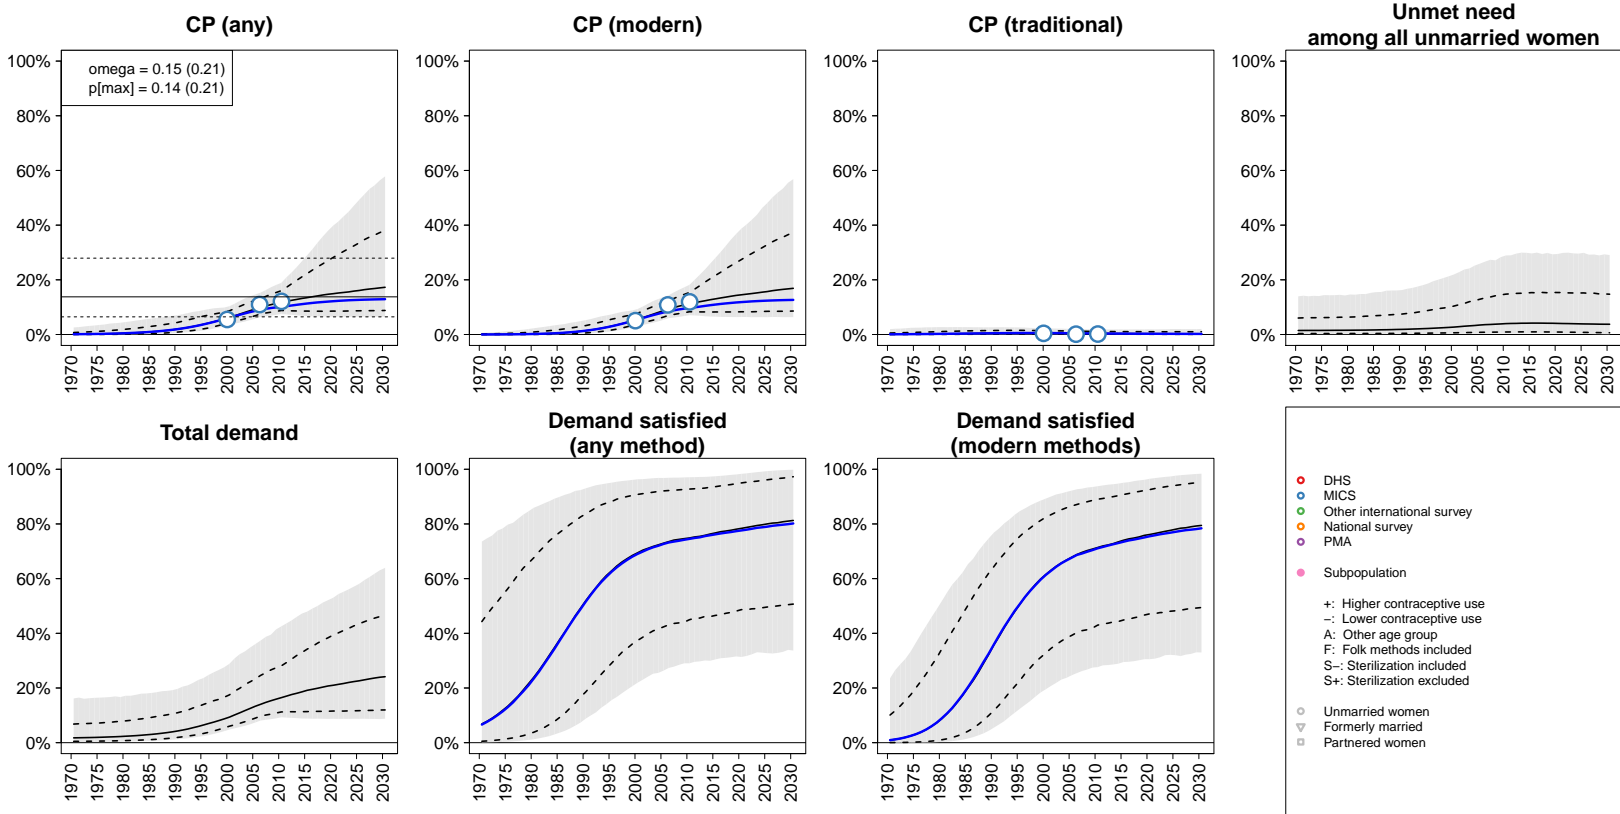

Tajikistan (Central Asia, SA Group 0) --- Unmarried / Not In-Union

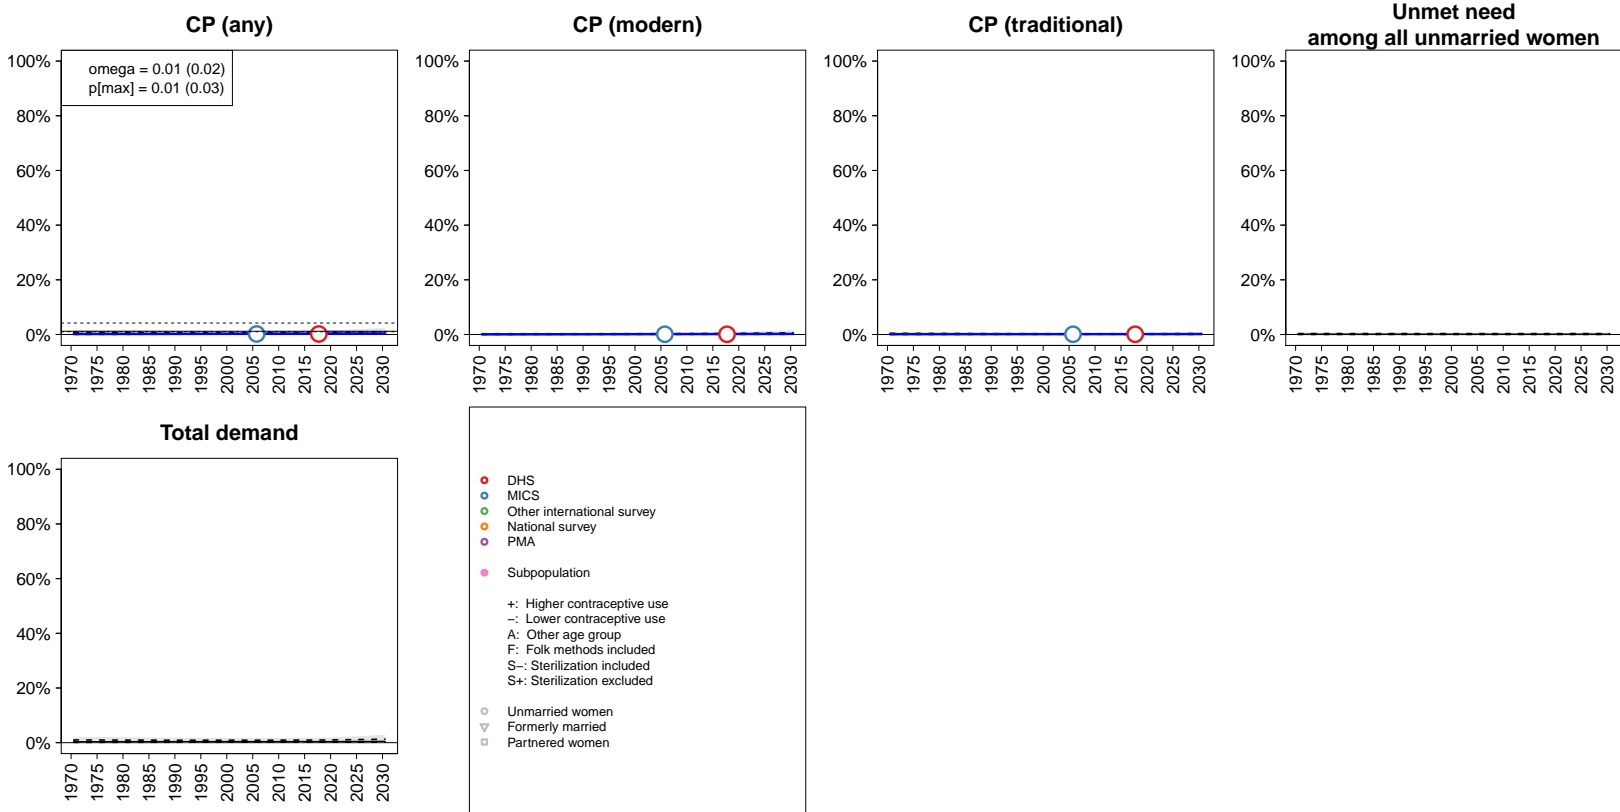

Thailand (South-eastern Asia, SA Group 1) --- Unmarried / Not In-Union

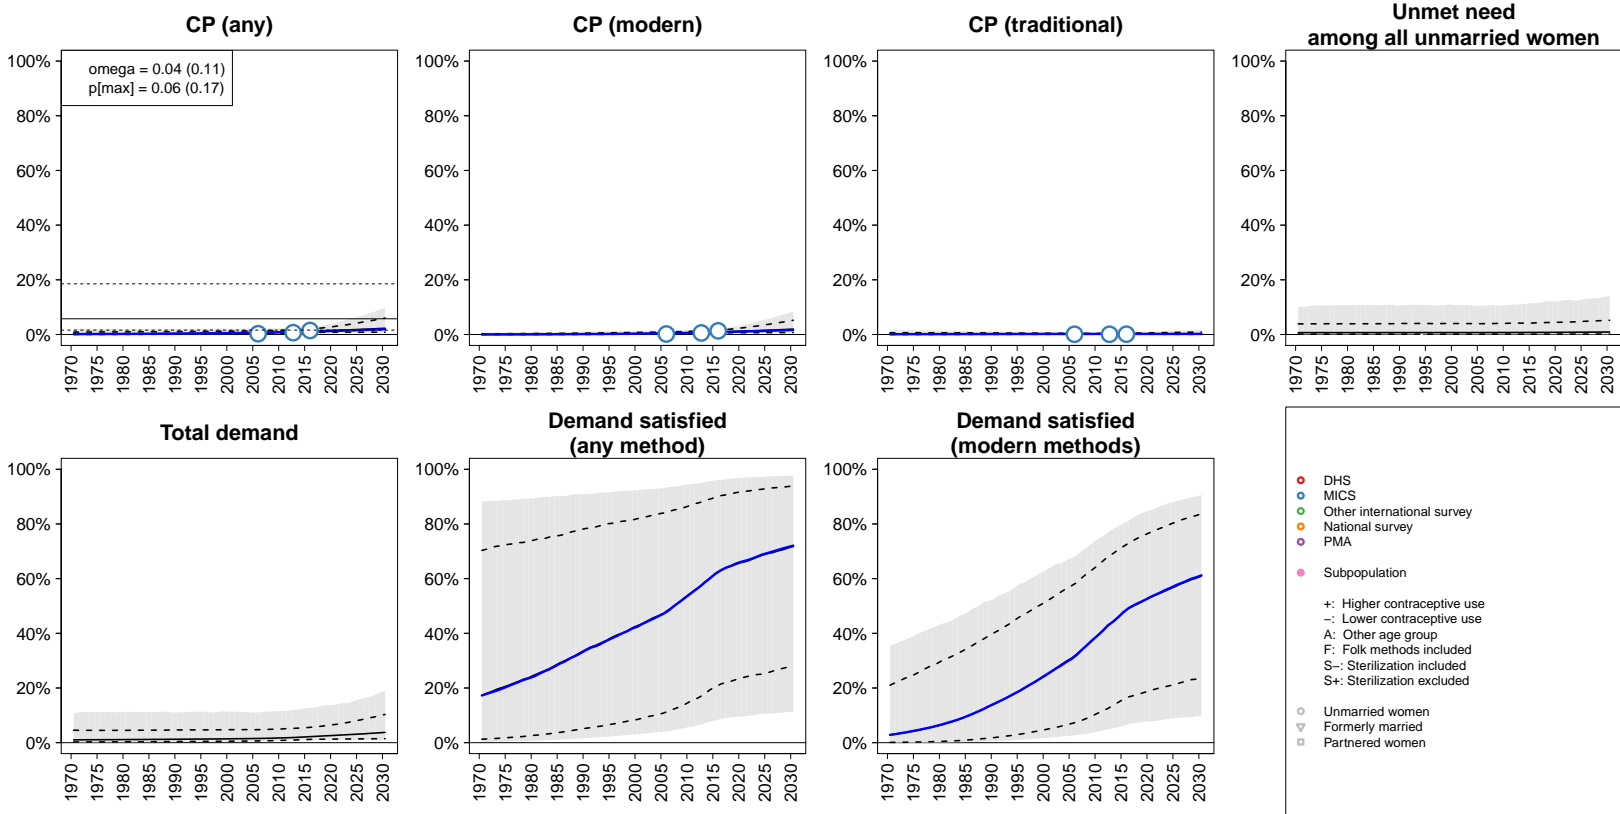



Togo (Western Africa, SA Group 1) --- Unmarried / Not In-Union

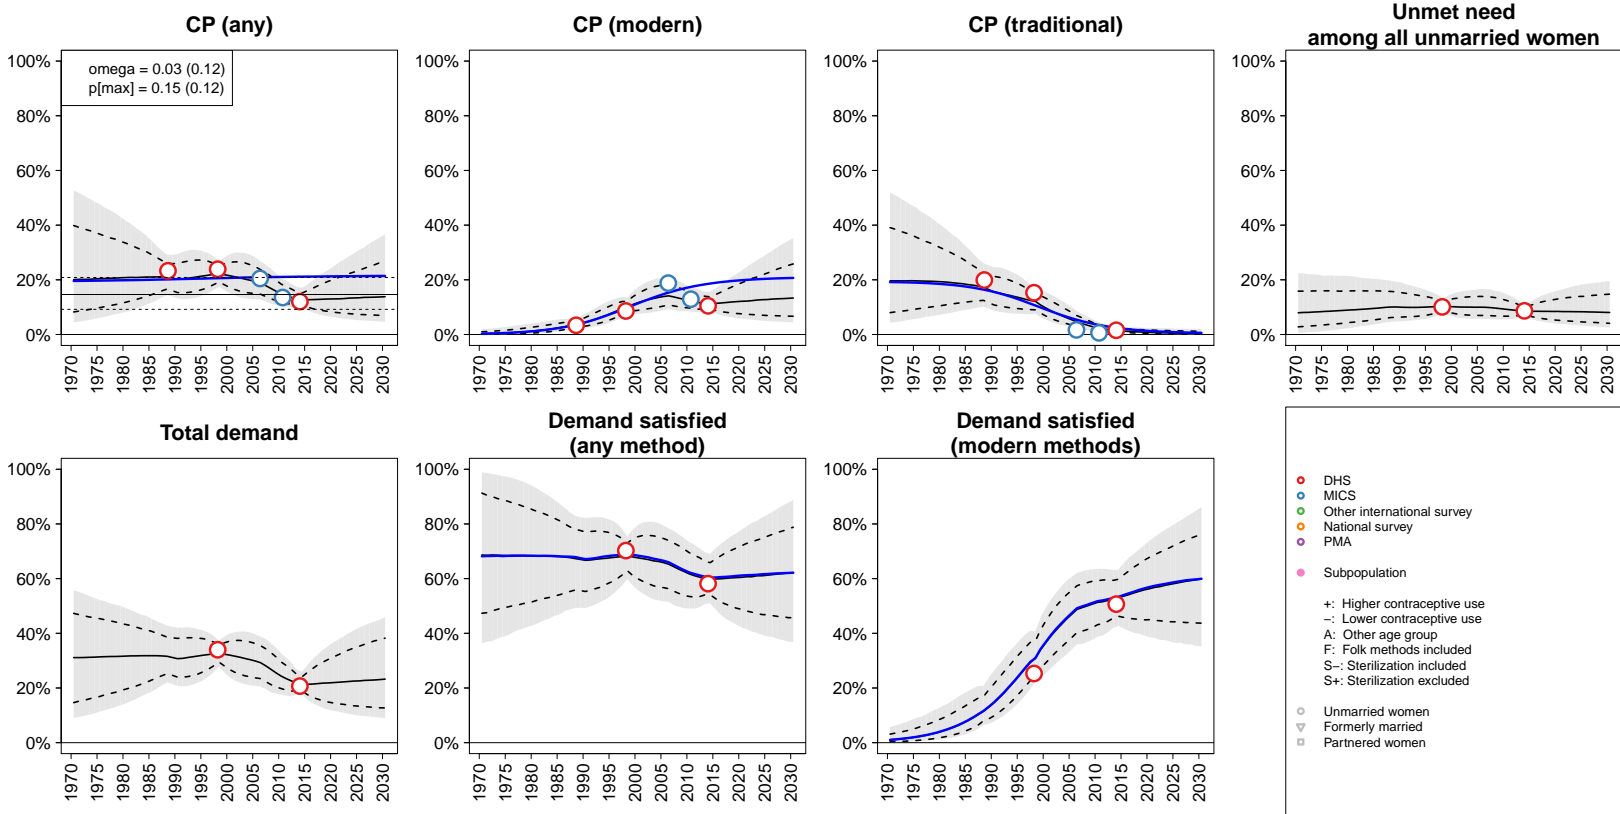

Trinidad and Tobago (Caribbean, SA Group 1) --- Unmarried / Not In-Union

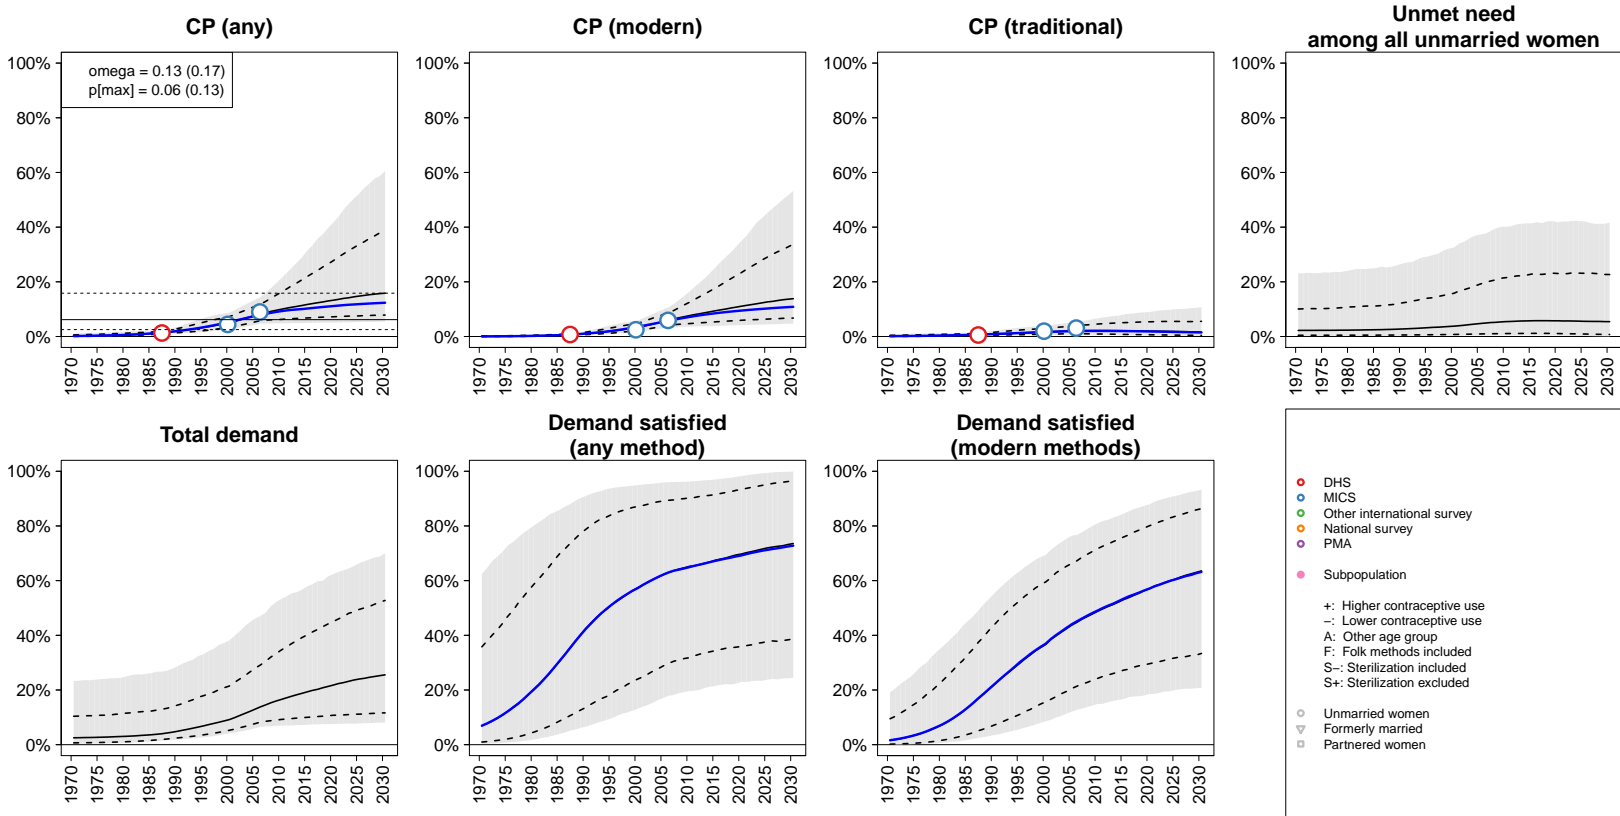

Uganda (Eastern Africa, SA Group 1) --- Unmarried / Not In-Union

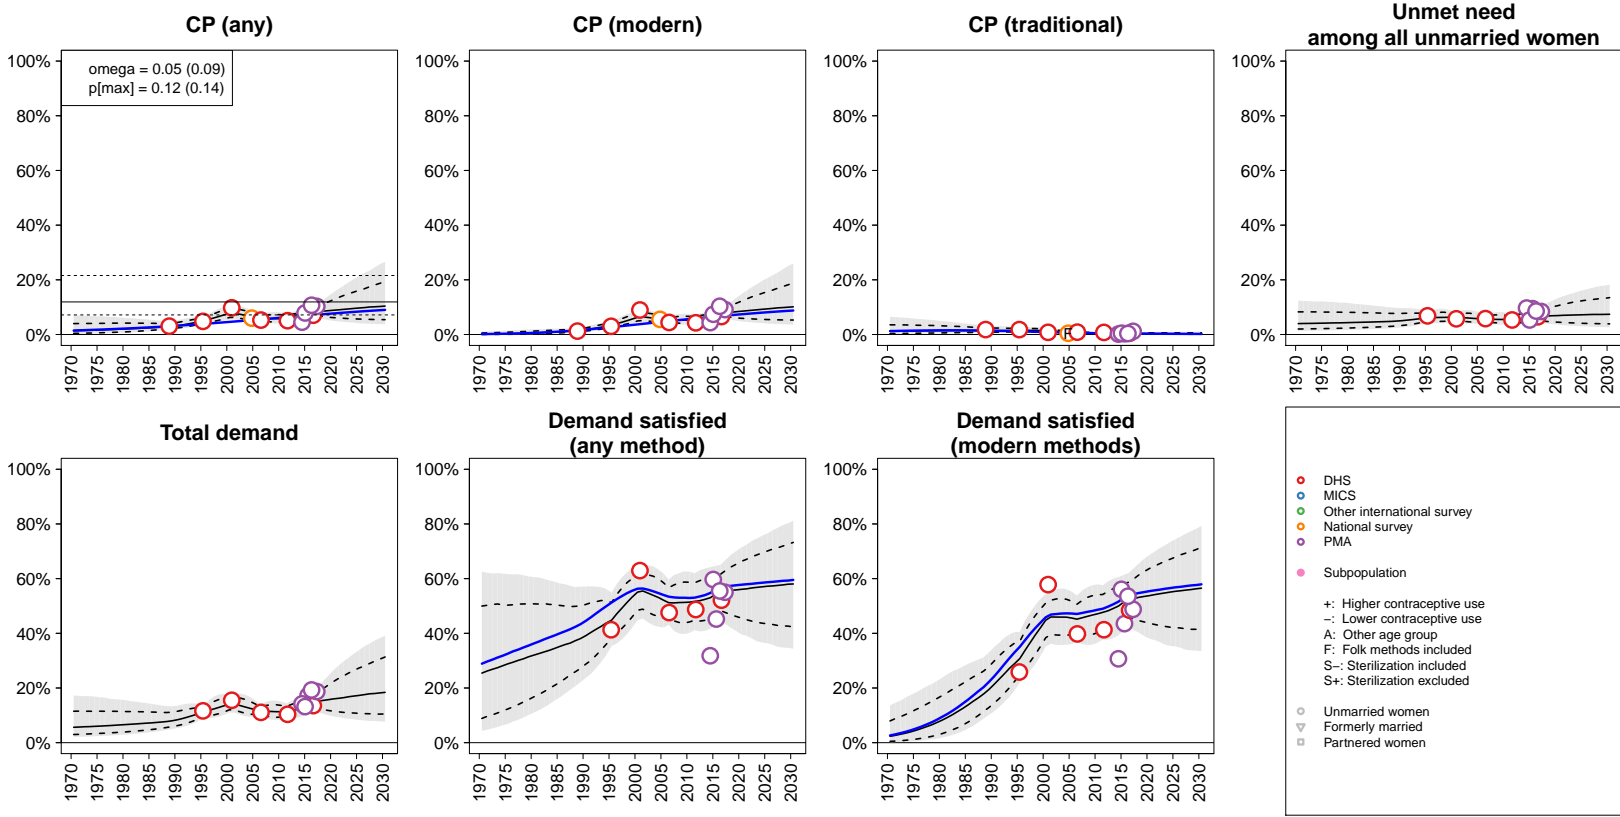

Ukraine (Eastern Europe, SA Group 1) ---- Unmarried / Not In-Union

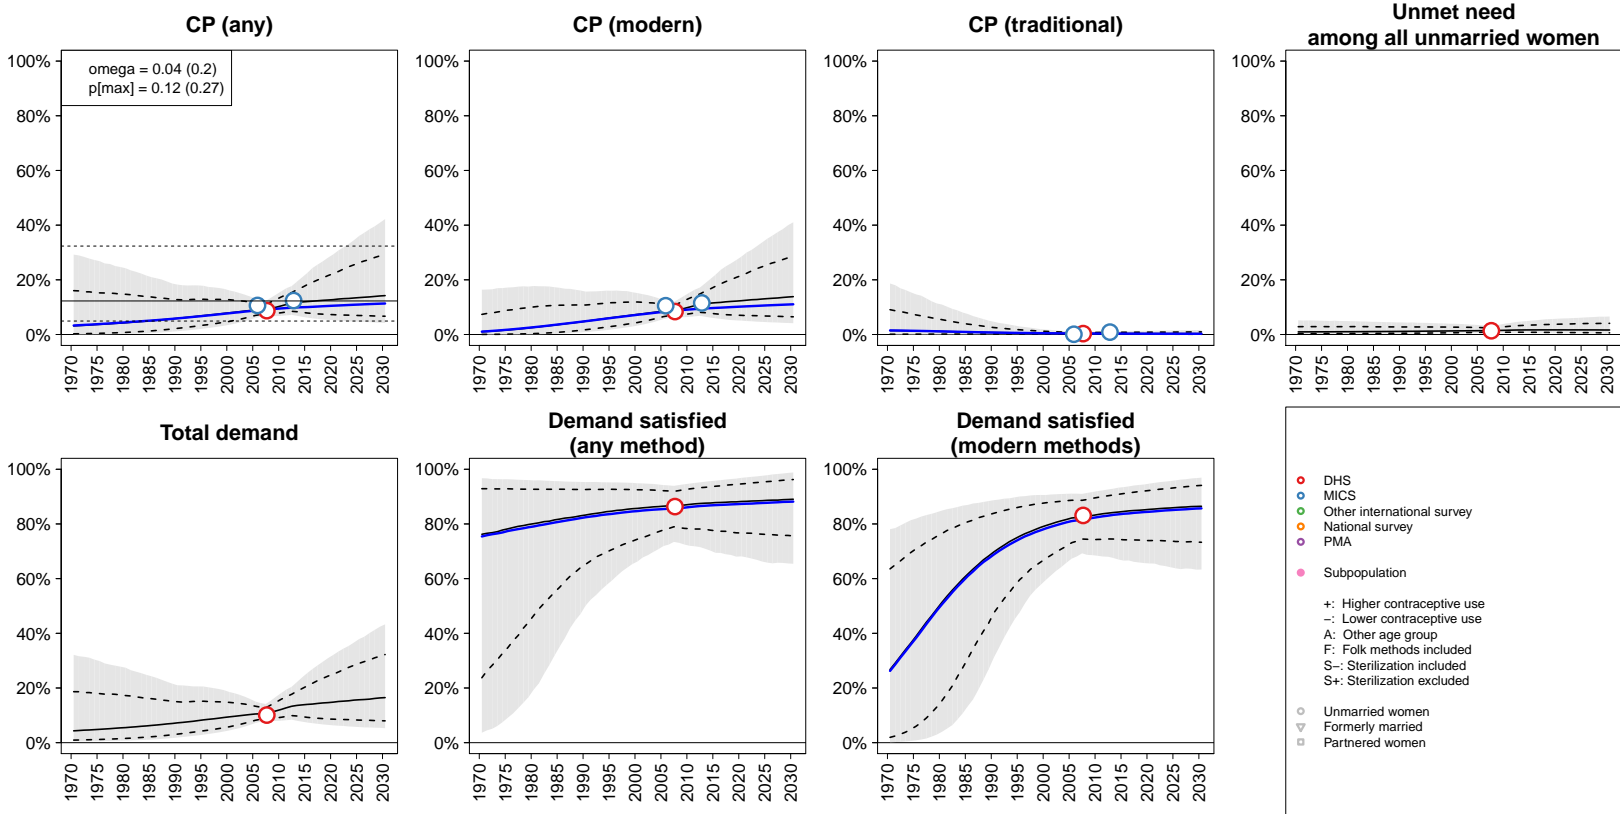

United Rep. of Tanzania (Eastern Africa, SA Group 1) --- Unmarried / Not In-Union

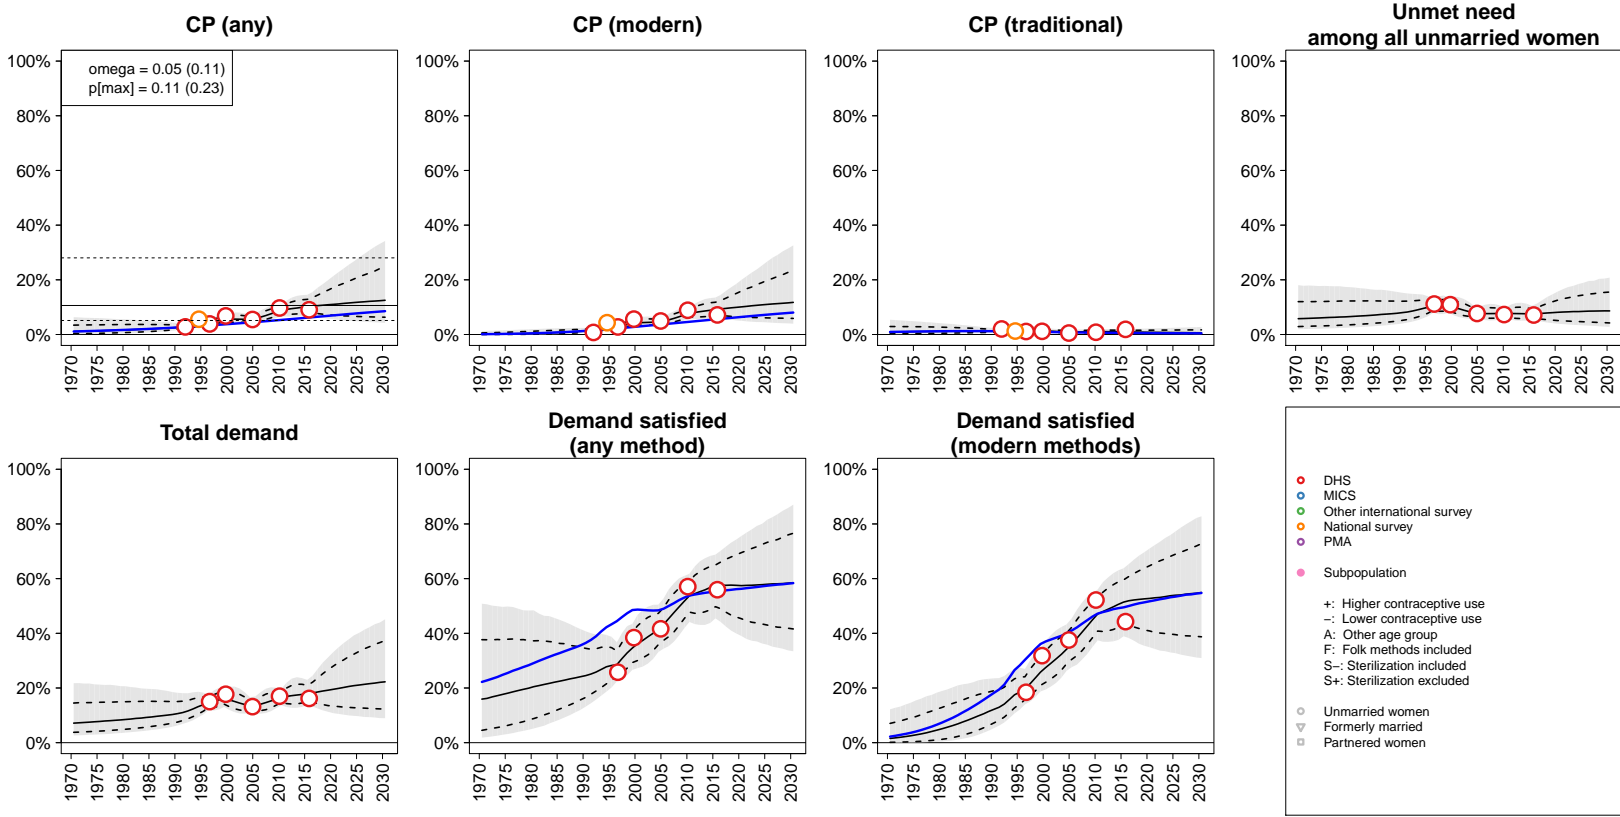

United States of America (Northern America, SA Group 1) --- Unmarried / Not In-Union

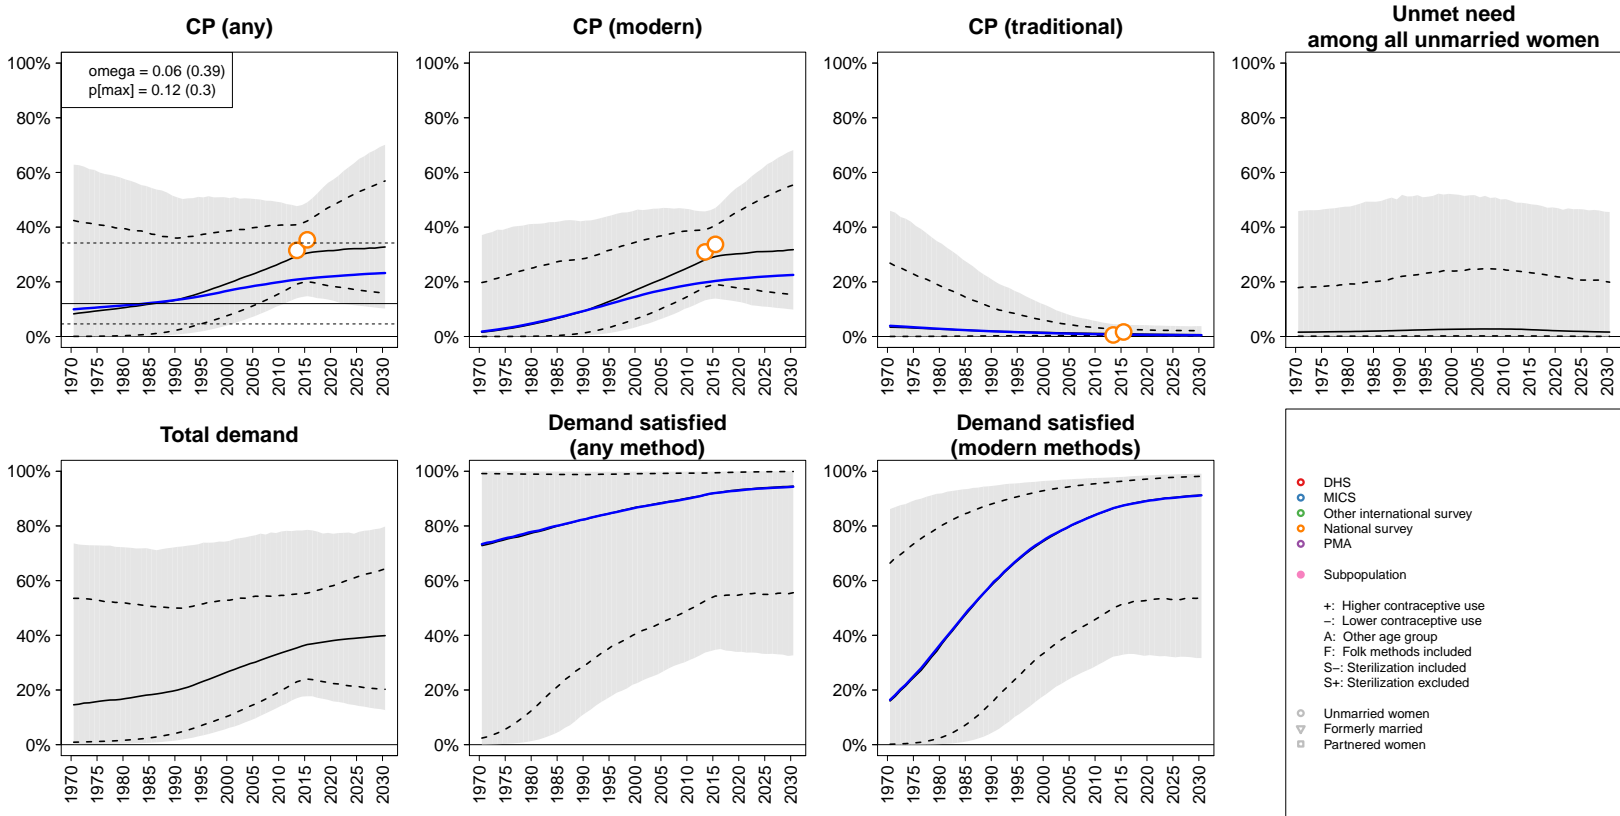

Uzbekistan (Central Asia, SA Group 0) ---- Unmarried / Not In-Union

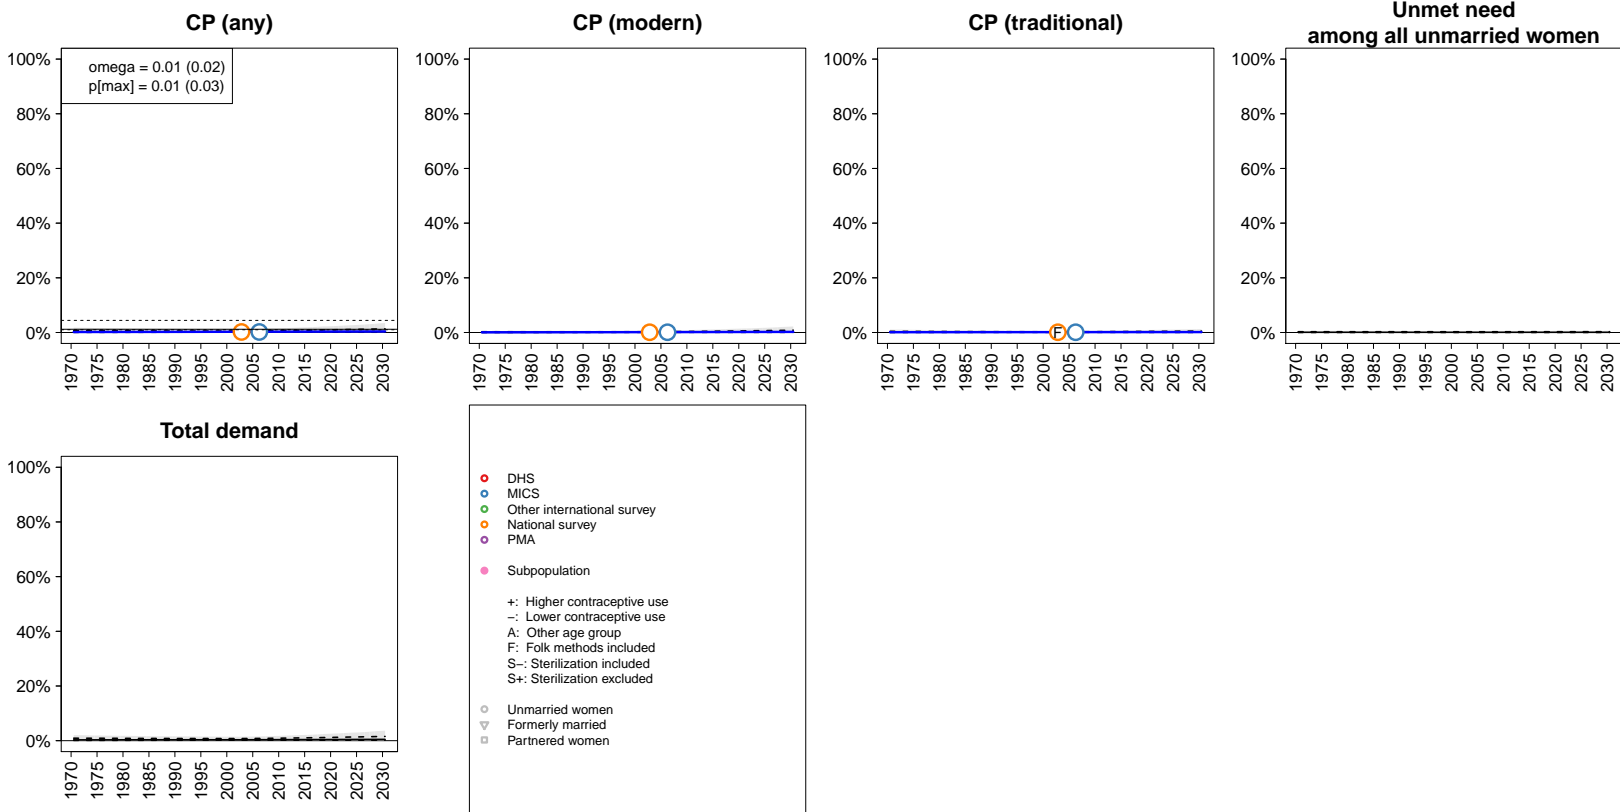

Vanuatu (Melanesia, SA Group 1) --- Unmarried / Not In-Union

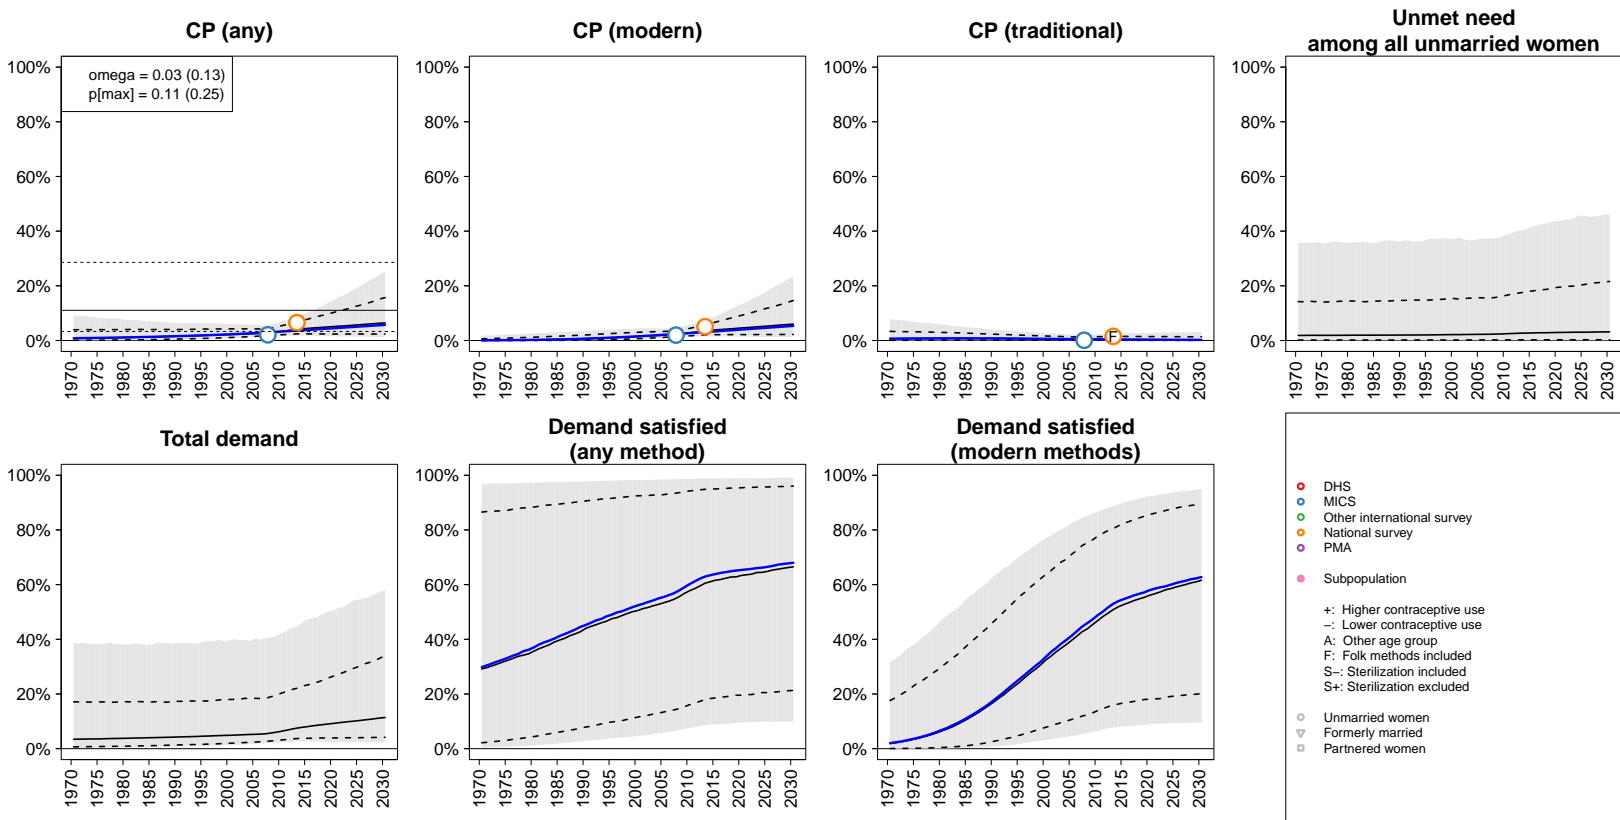



Viet Nam (South-eastern Asia, SA Group 0) --- Unmarried / Not In-Union

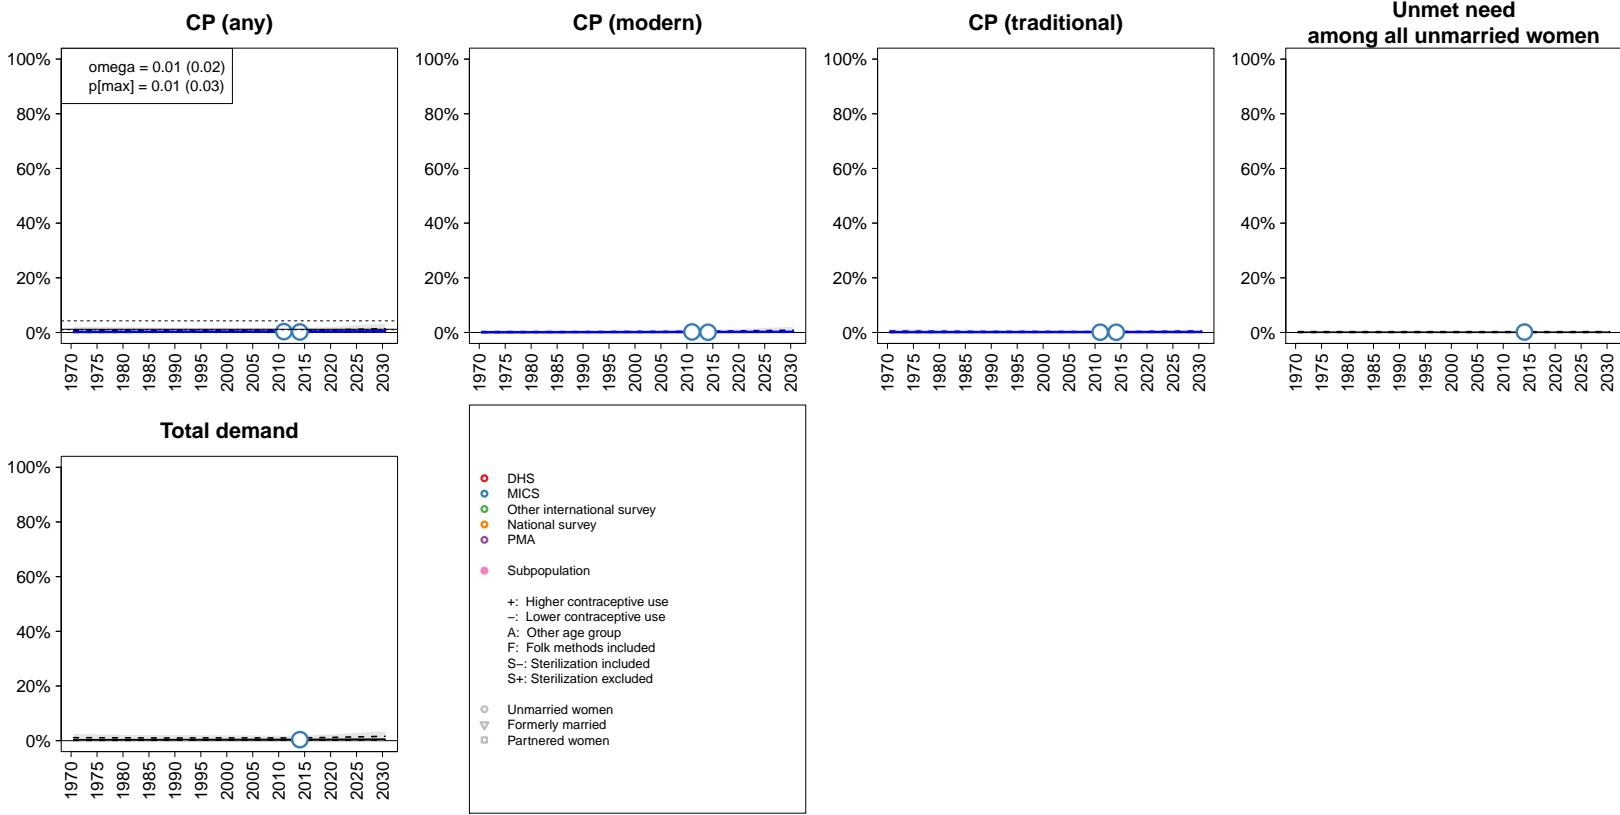

Zambia (Eastern Africa, SA Group 1) — Unmarried / Not In-Union

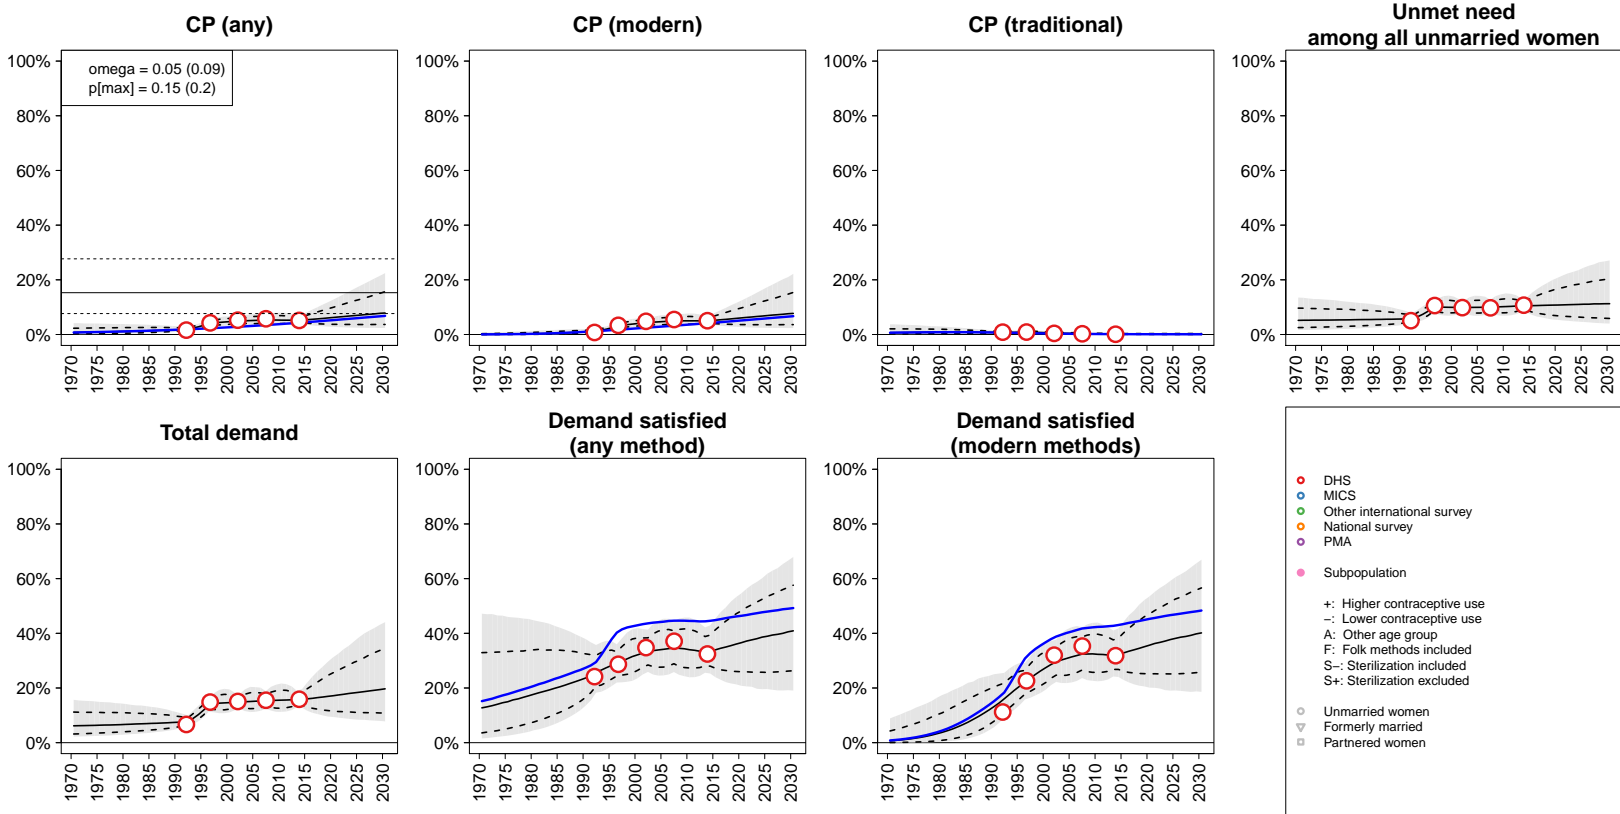

Zimbabwe (Eastern Africa, SA Group 1) --- Unmarried / Not In-Union

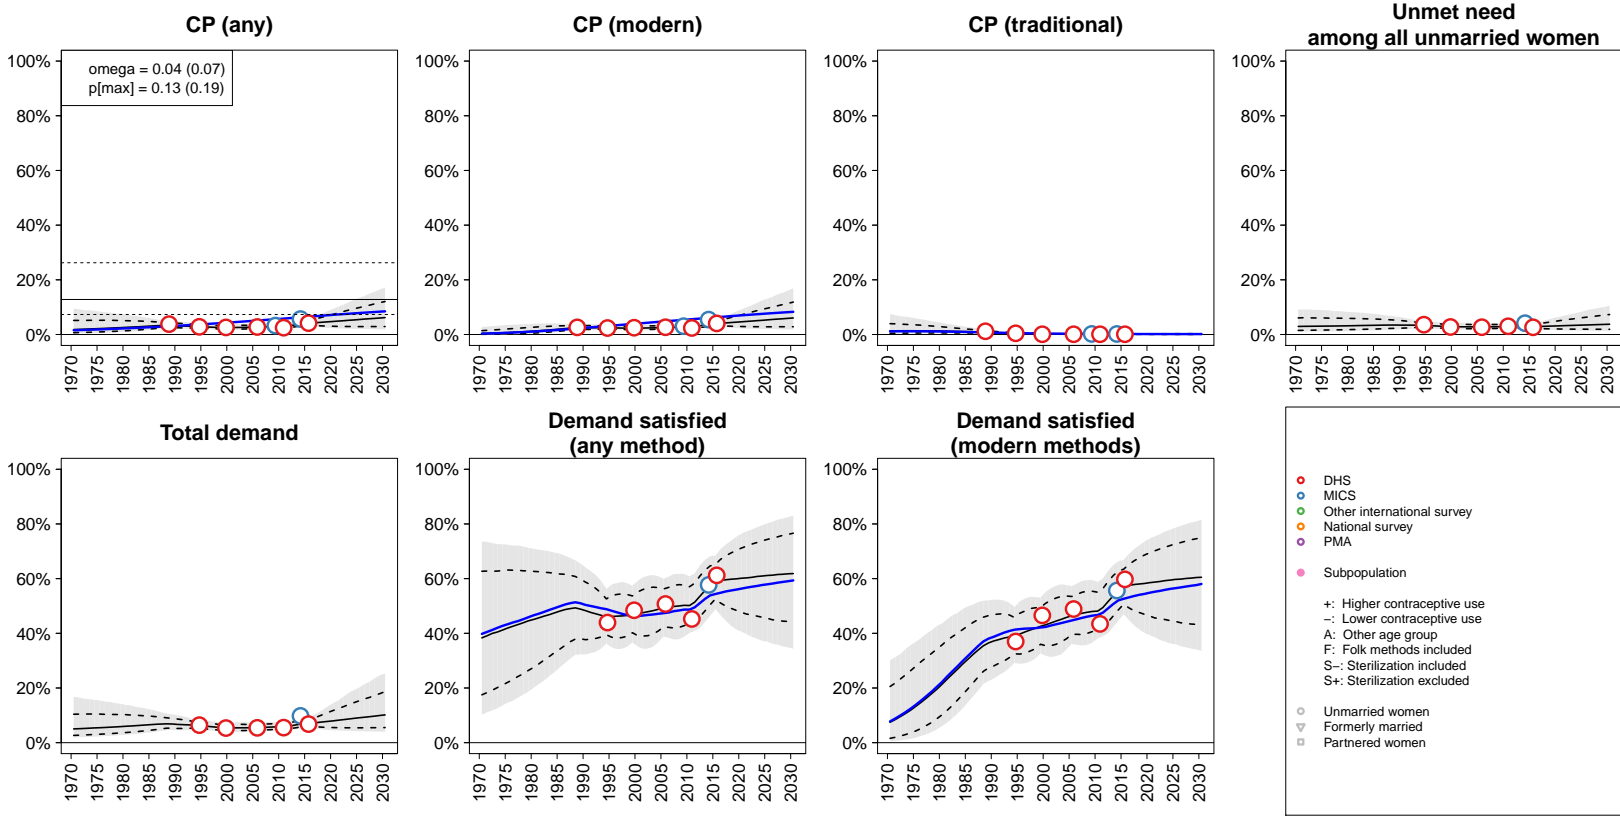

## 4.2 Married Adolescent Women

Afghanistan (Southern Asia) --- Married / In-Union

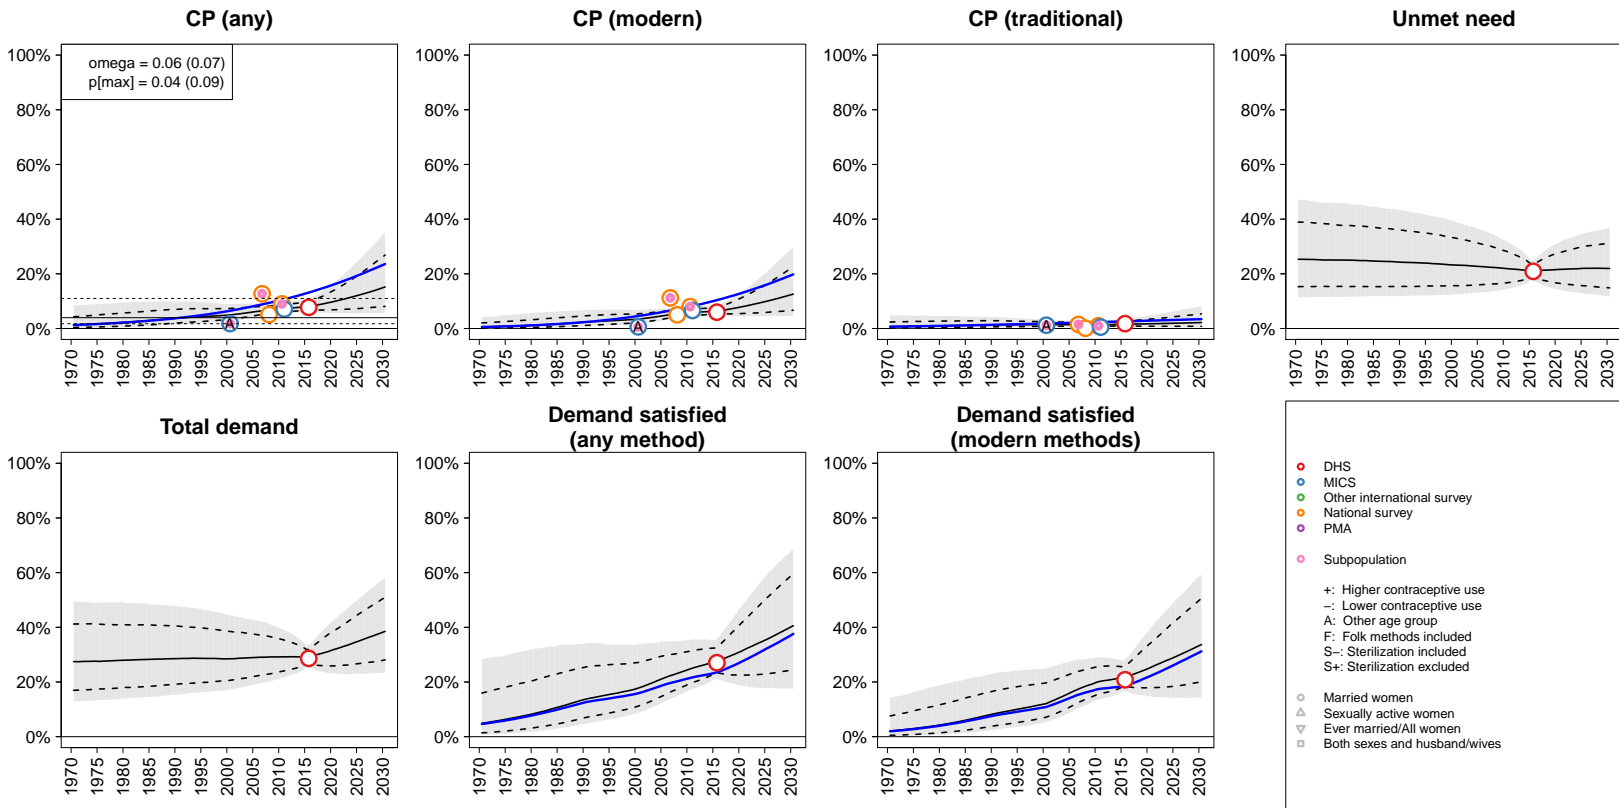

Albania (Southern Europe) --- Married / In-Union

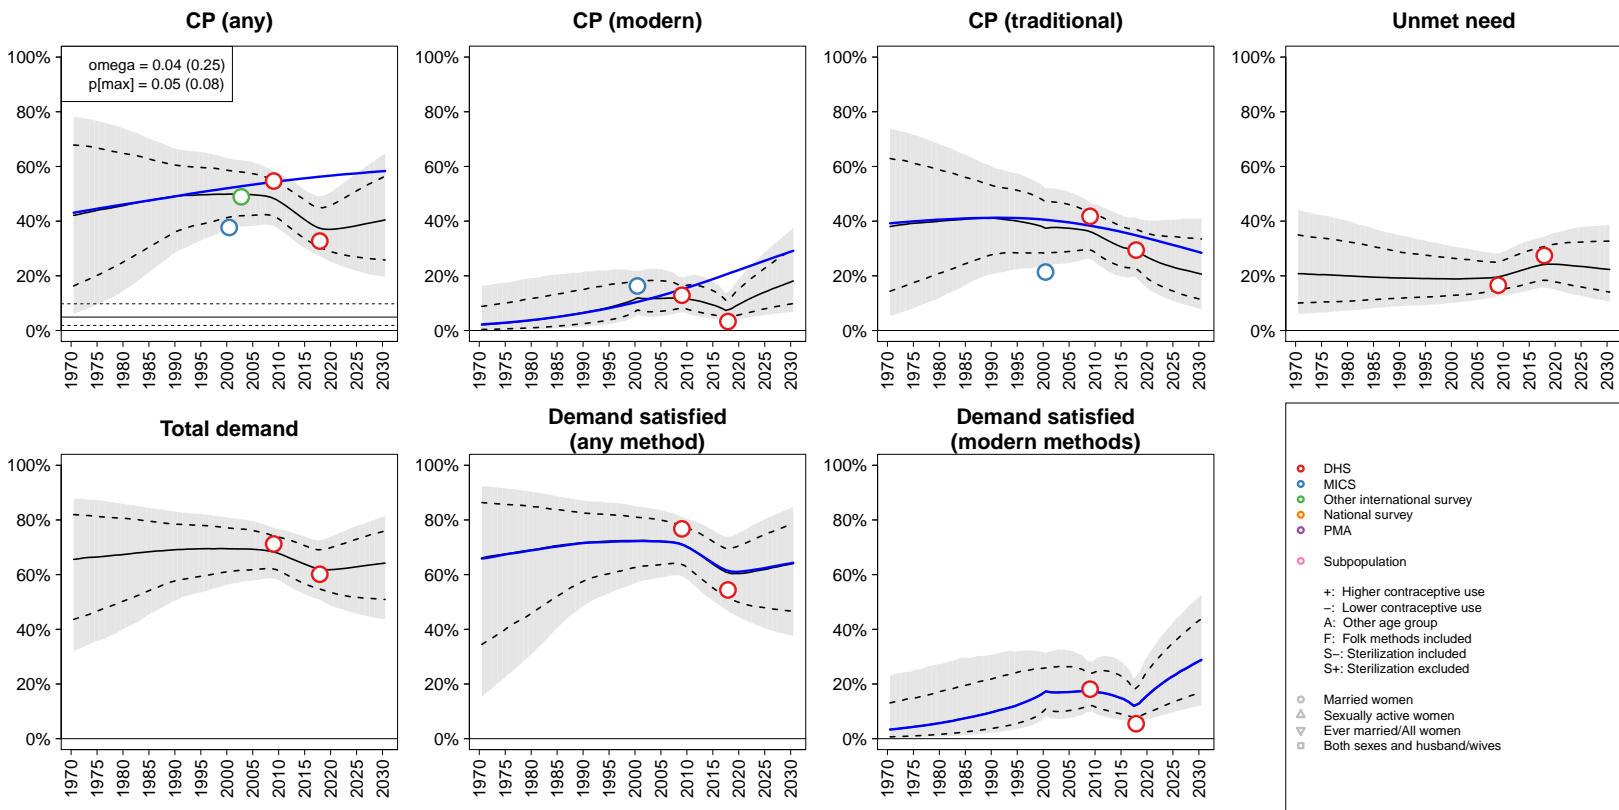

Algeria (Northern Africa) — Married / In-Union

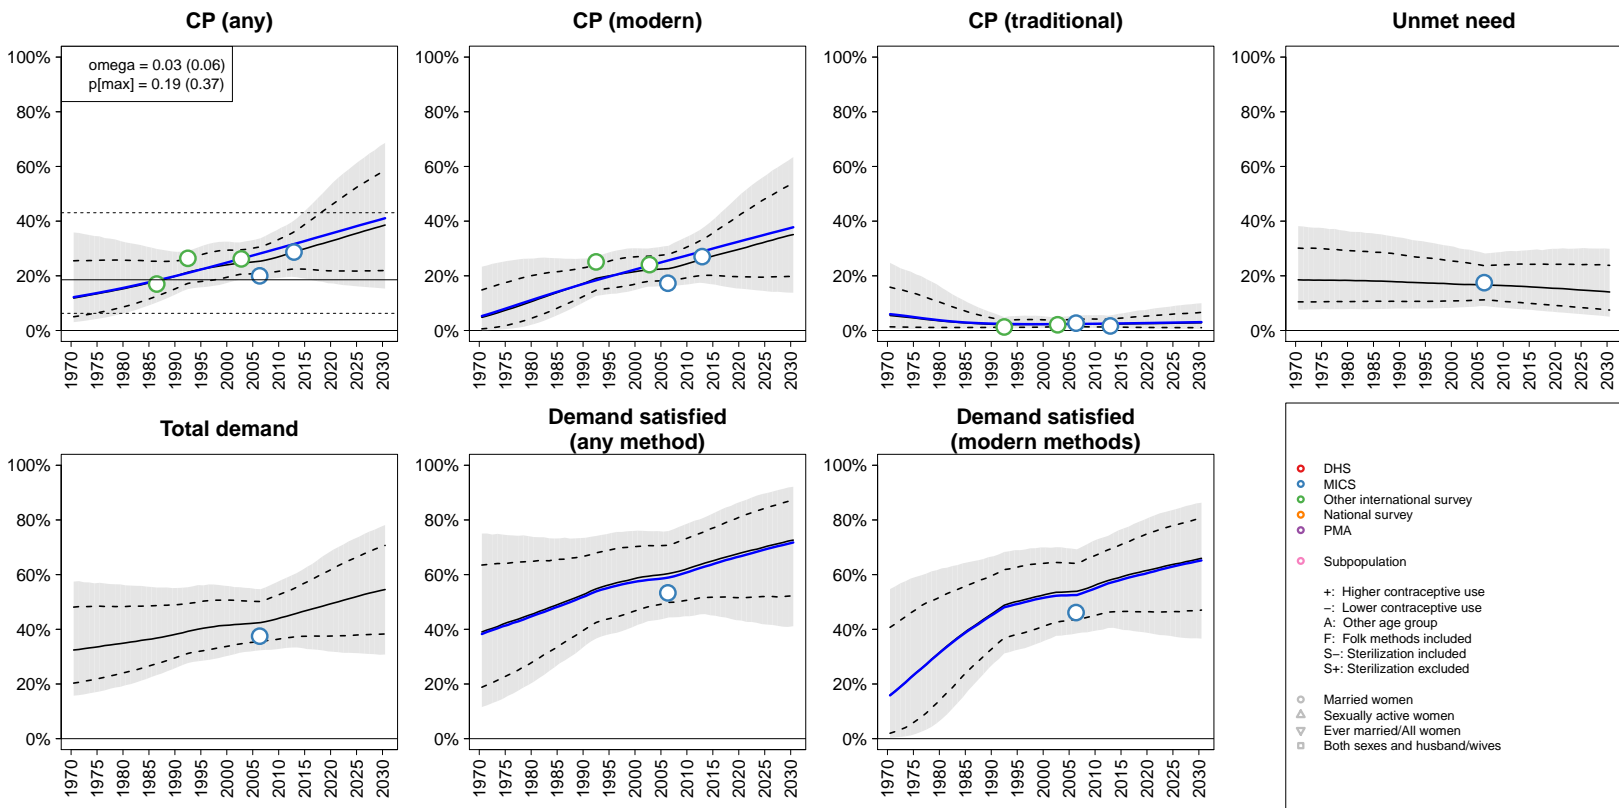

Angola (Middle Africa) --- Married / In-Union

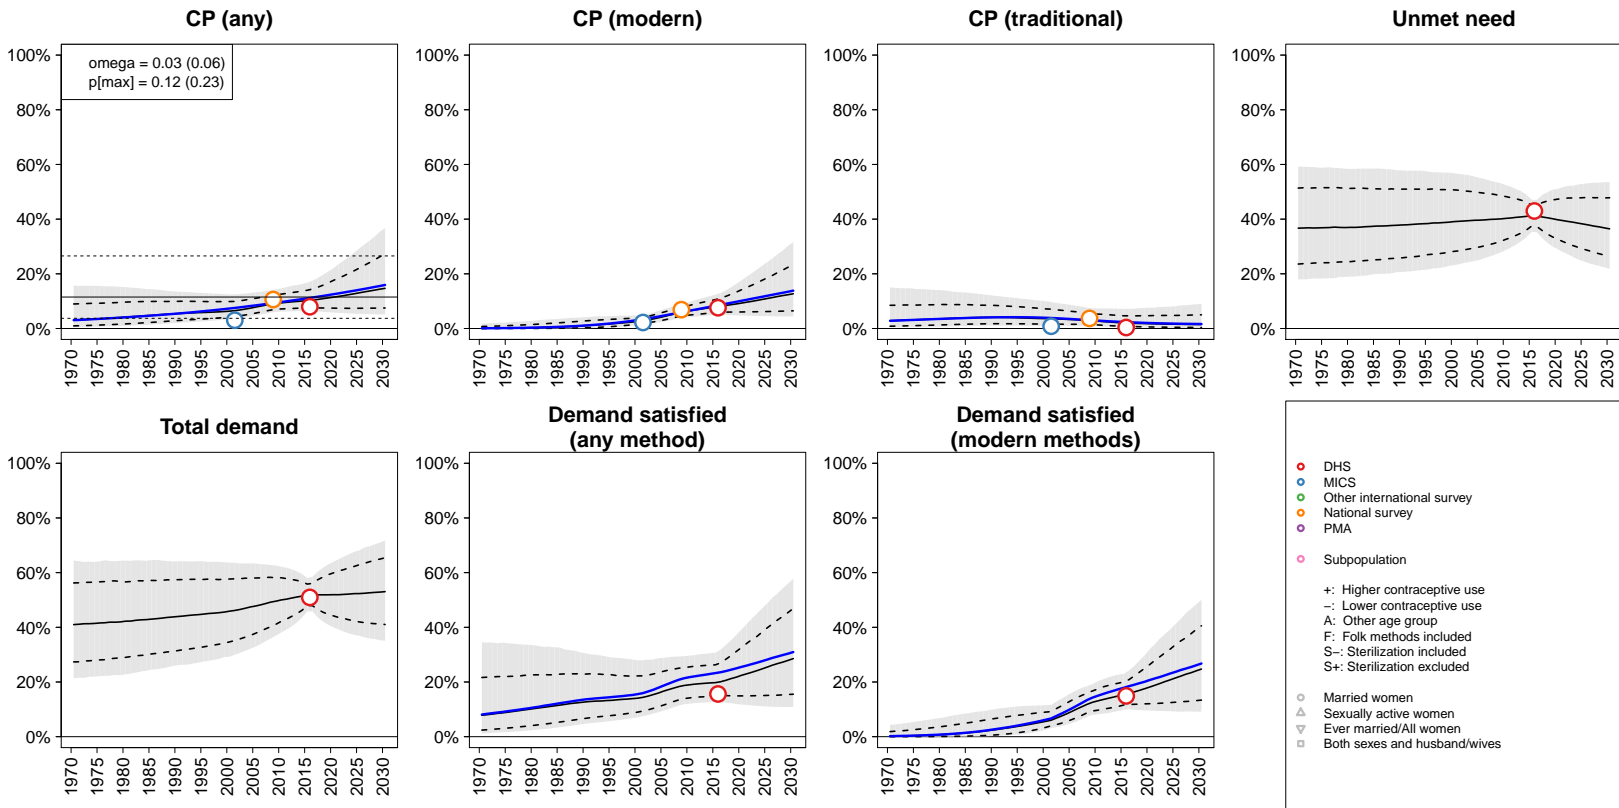



Antigua and Barbuda (Caribbean) --- Married / In-Union

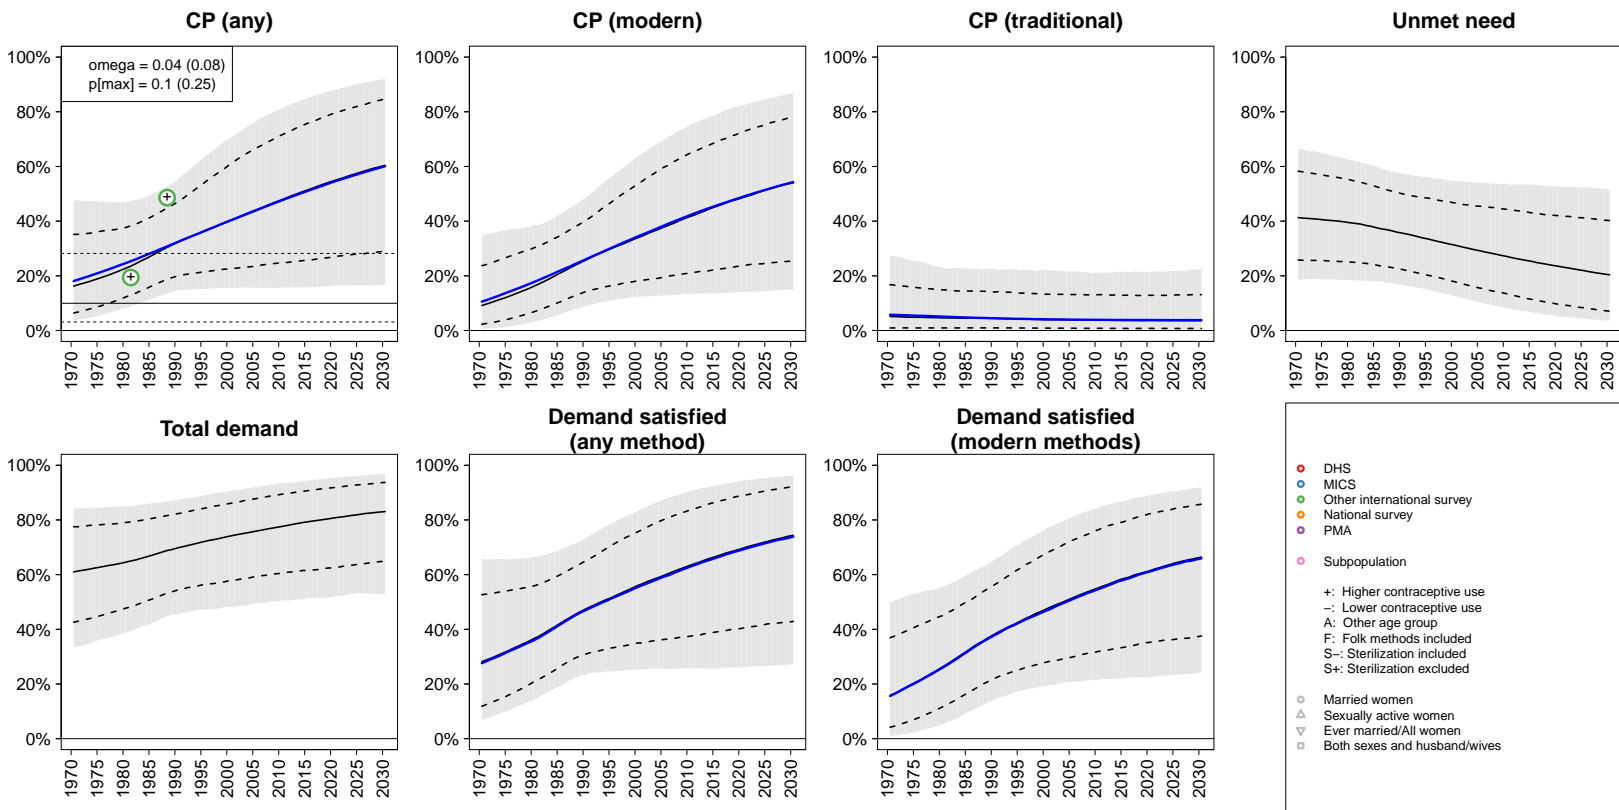

Armenia (Western Asia) --- Married / In-Union

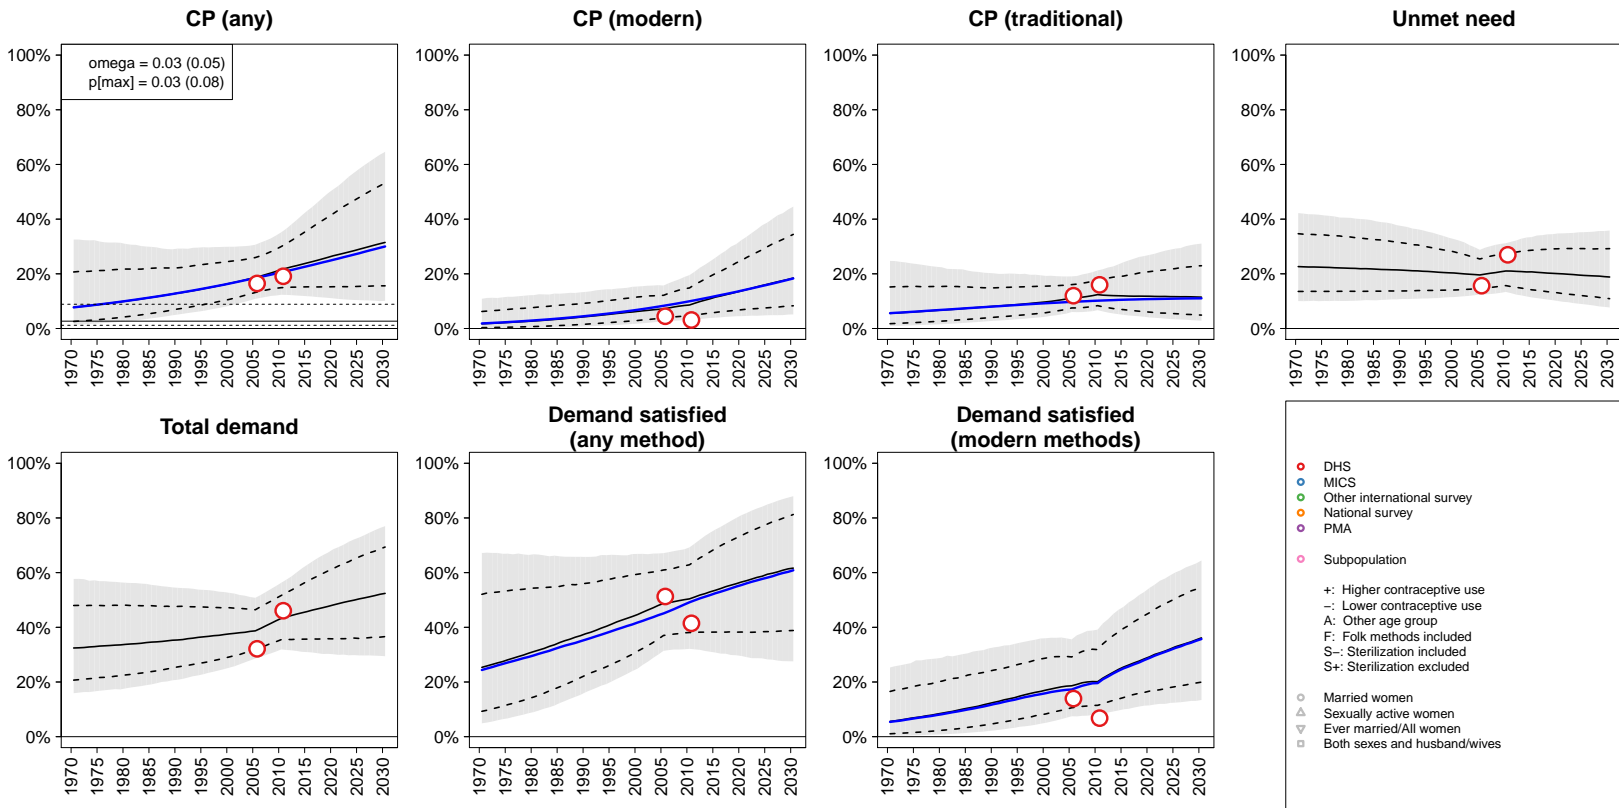

Azerbaijan (Western Asia) --- Married / In-Union

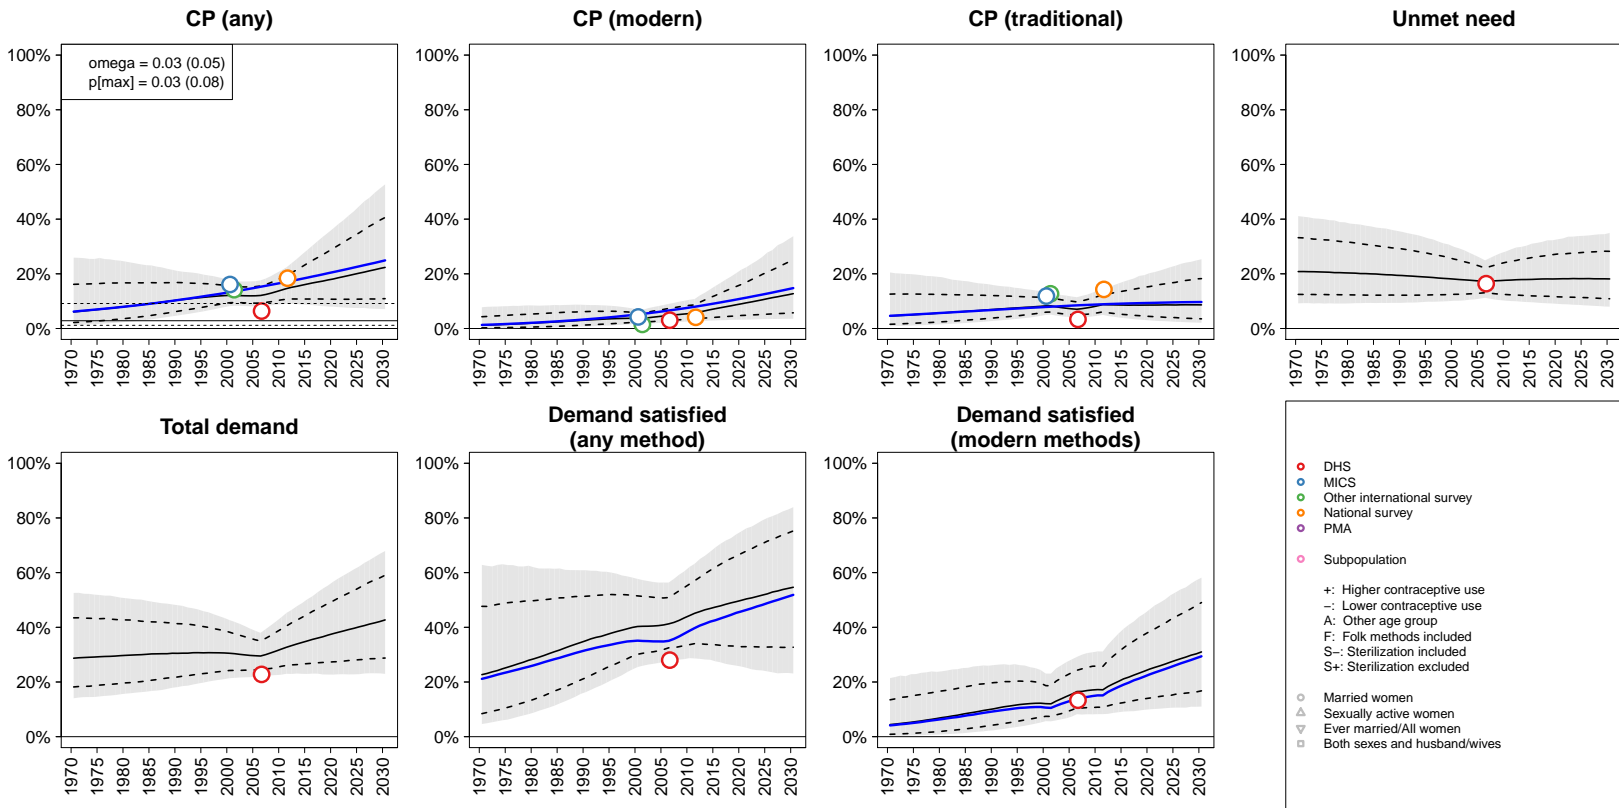

Bahrain (Western Asia) --- Married / In-Union

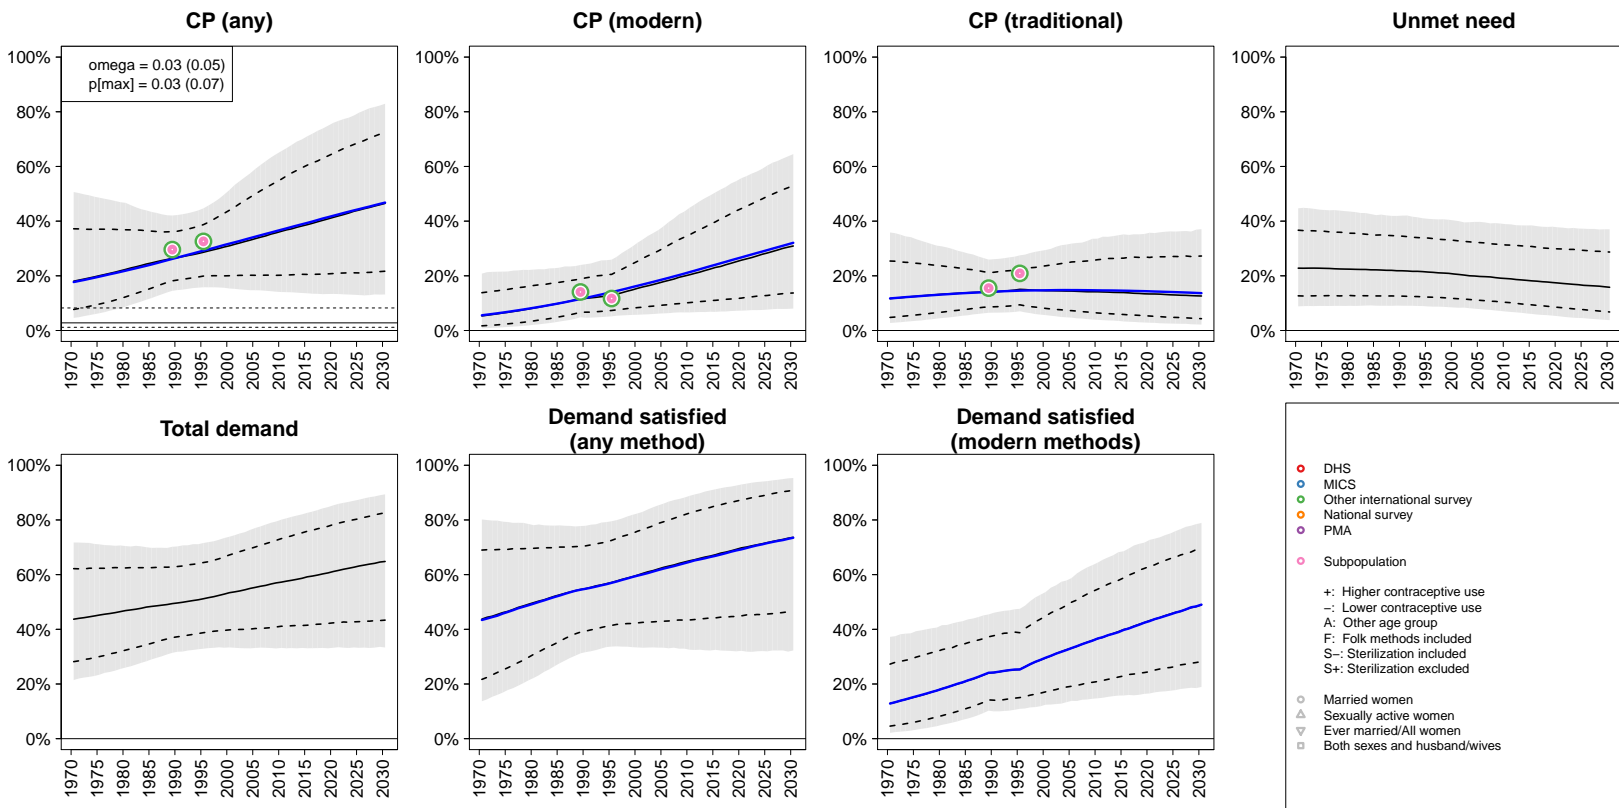

Bangladesh (Southern Asia) --- Married / In-Union

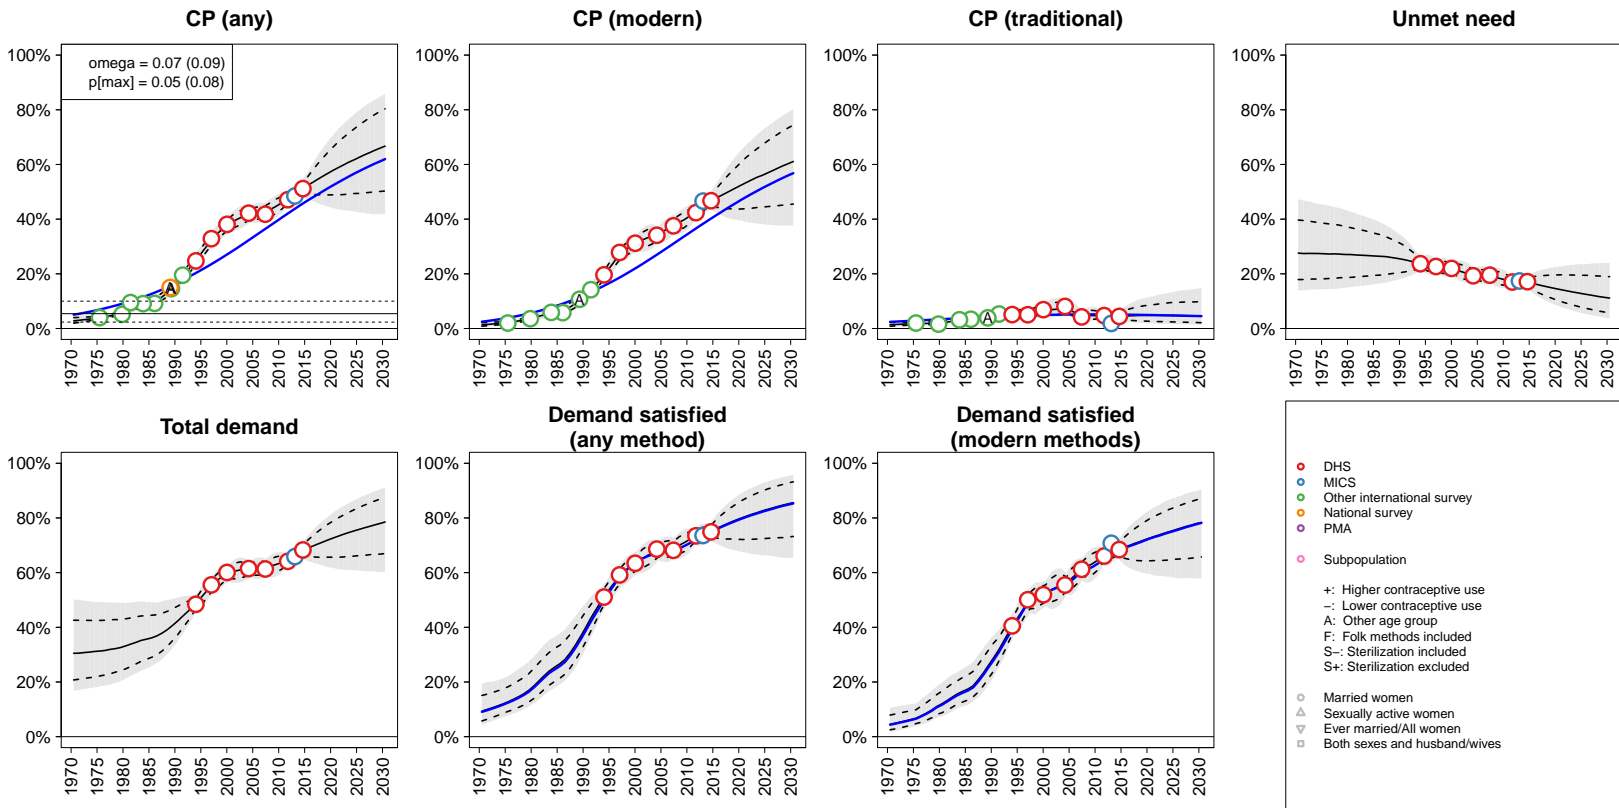

Barbados (Caribbean) --- Married / In-Union

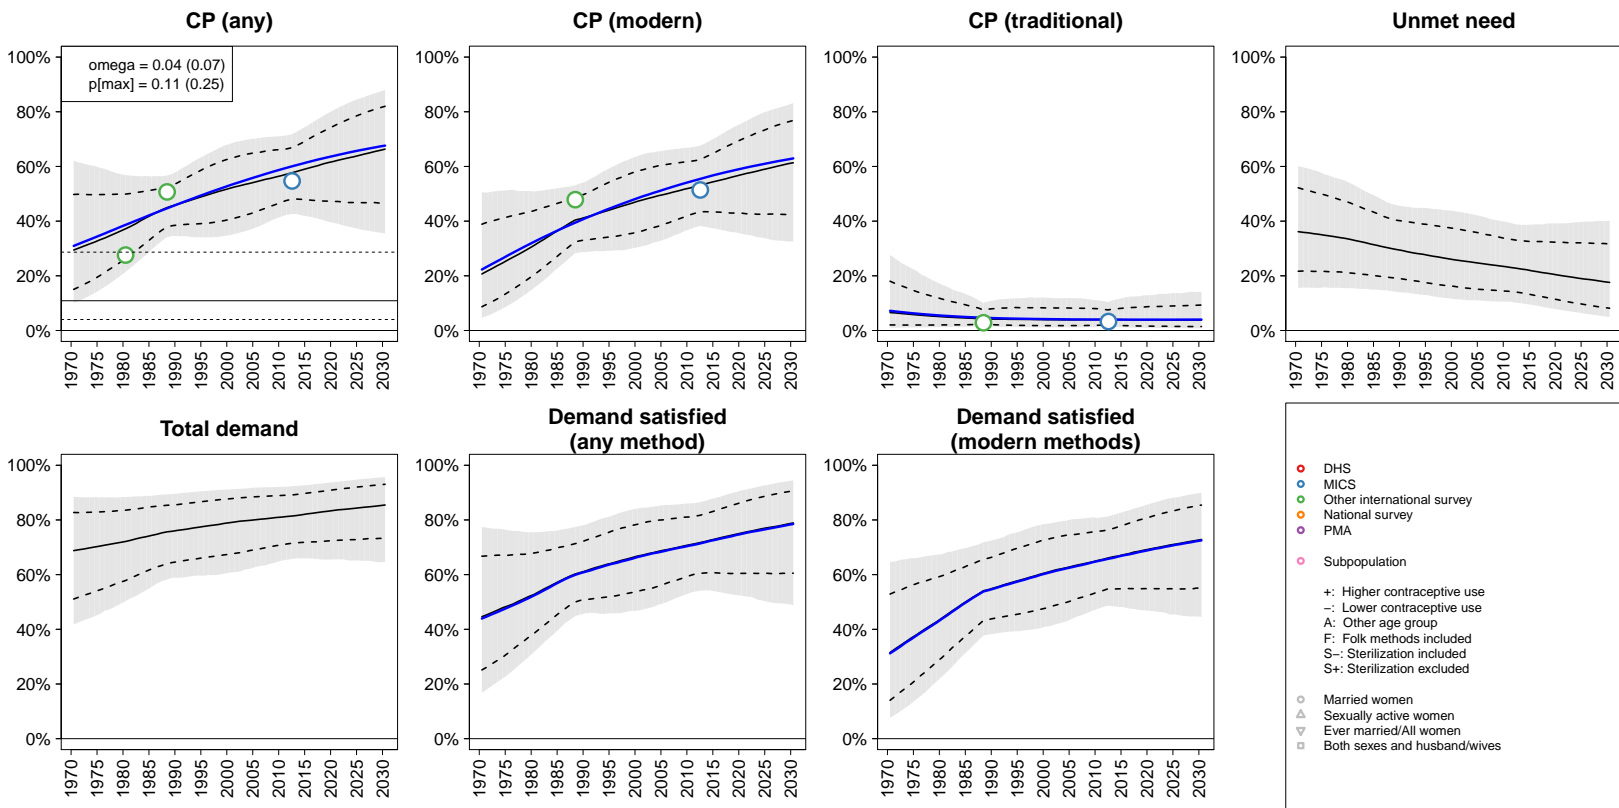

Belize (Central America) — Married / In-Union

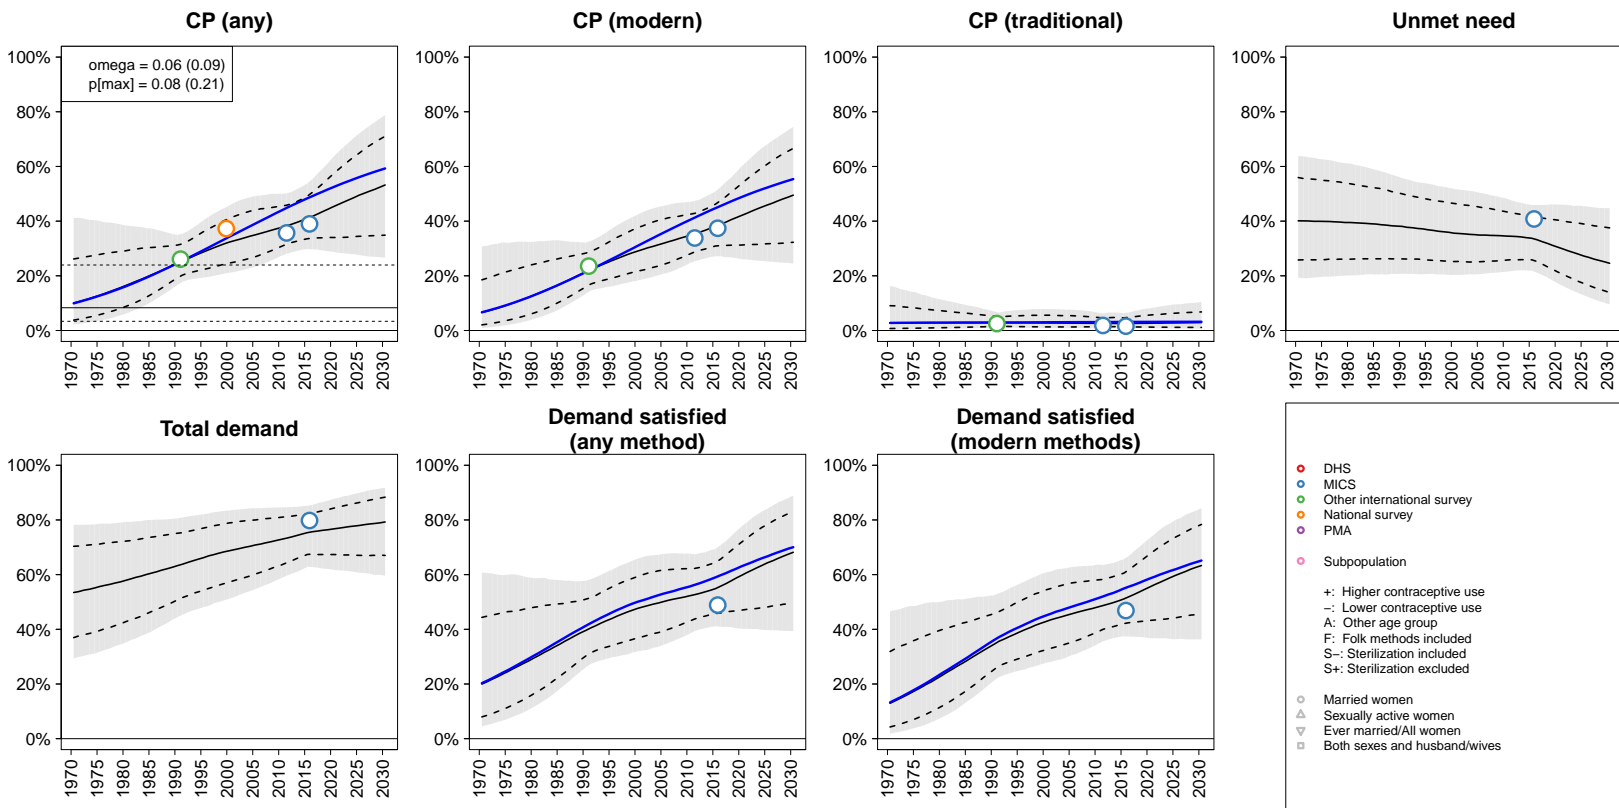

Benin (Western Africa) --- Married / In-Union

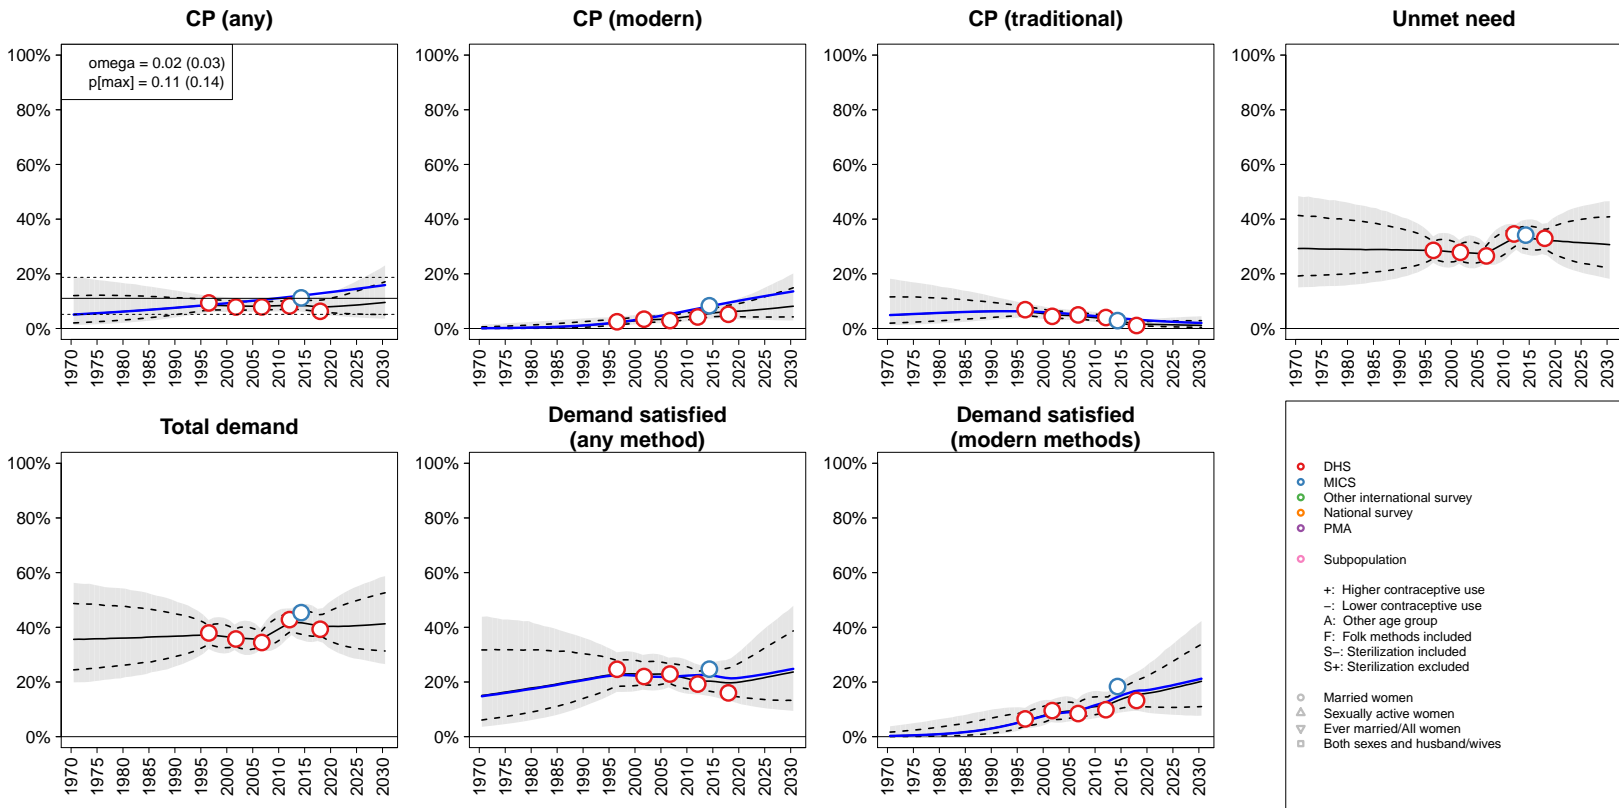



Bolivia, Plurinational State of (South America) --- Married / In-Union

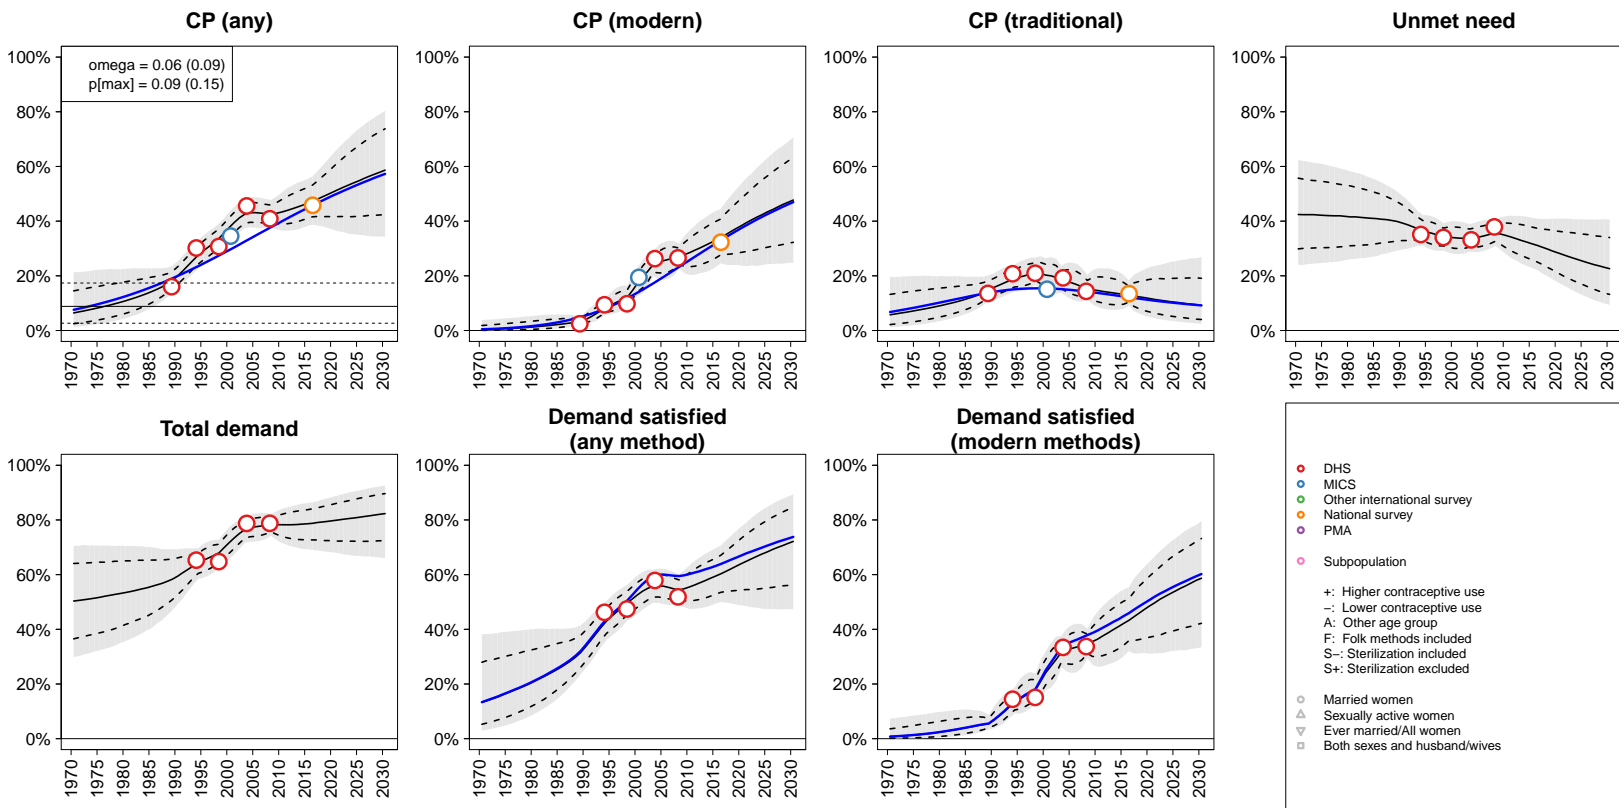

Bosnia and Herzegovina (Southern Europe) --- Married / In-Union

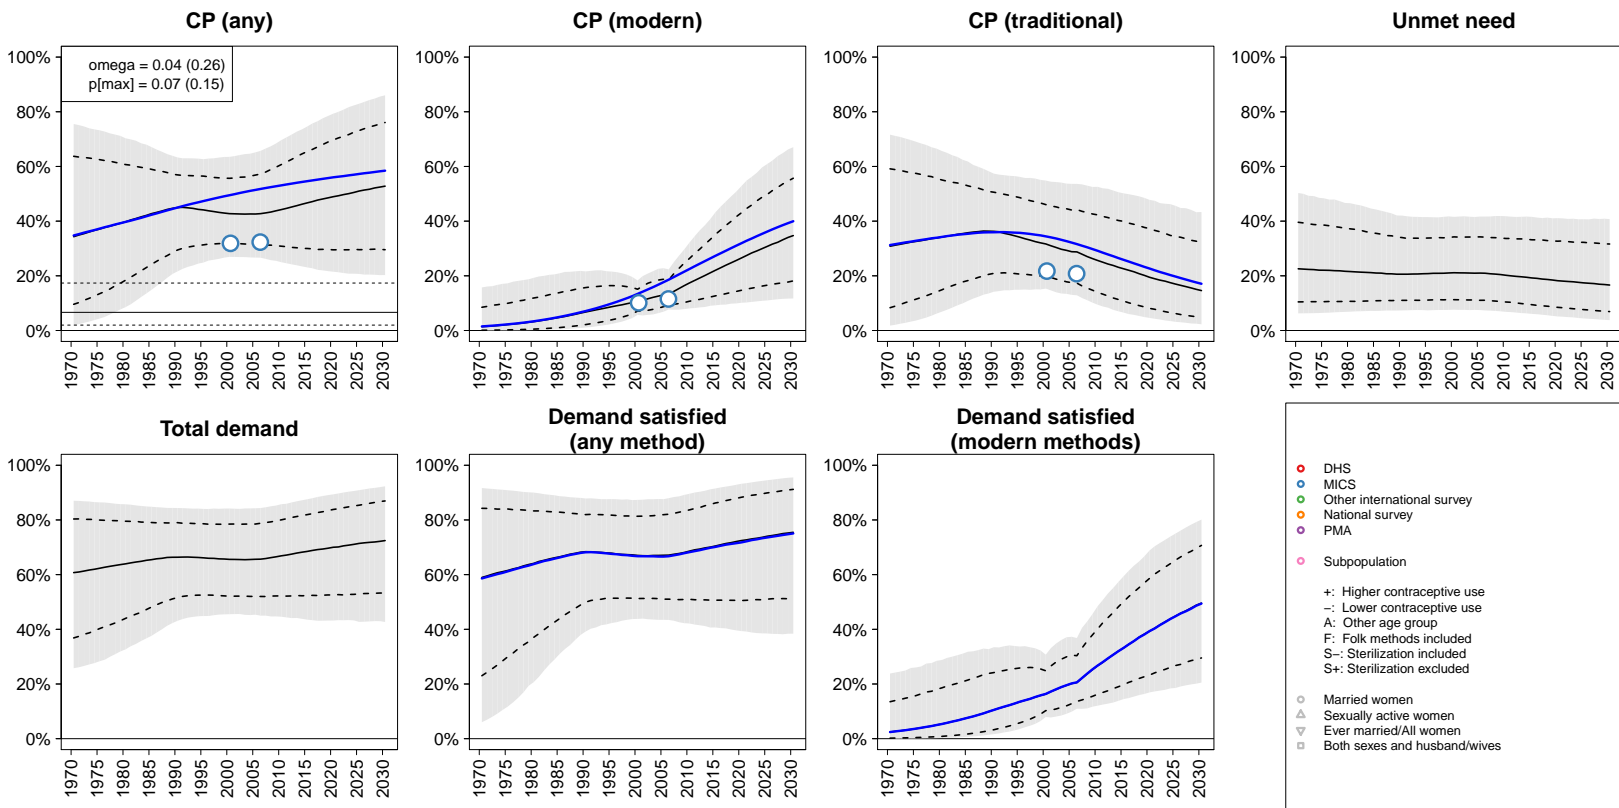

Botswana (Southern Africa) --- Married / In-Union

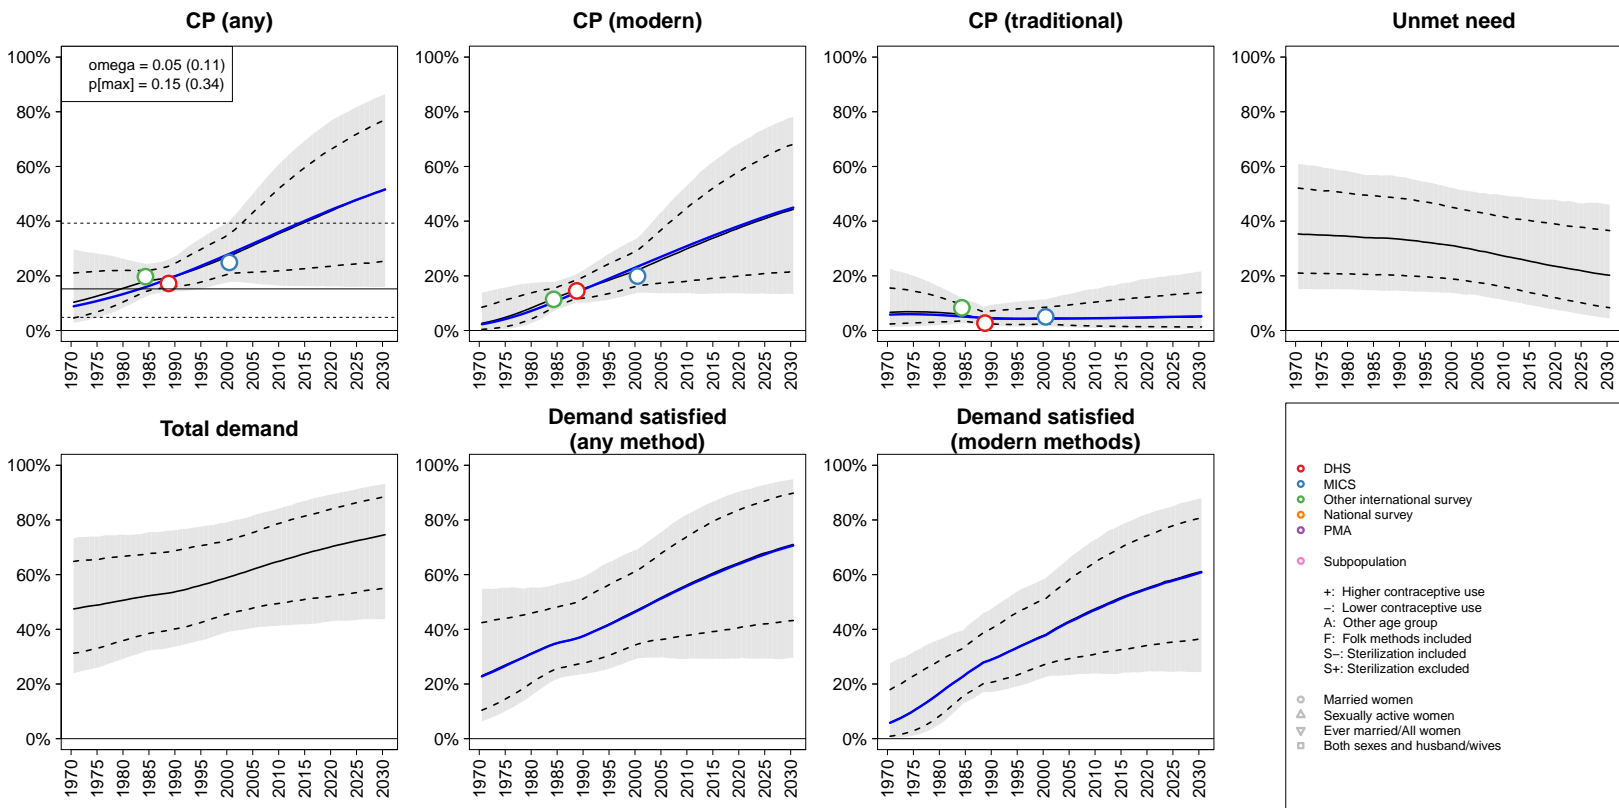

Brazil (South America) --- Married / In-Union

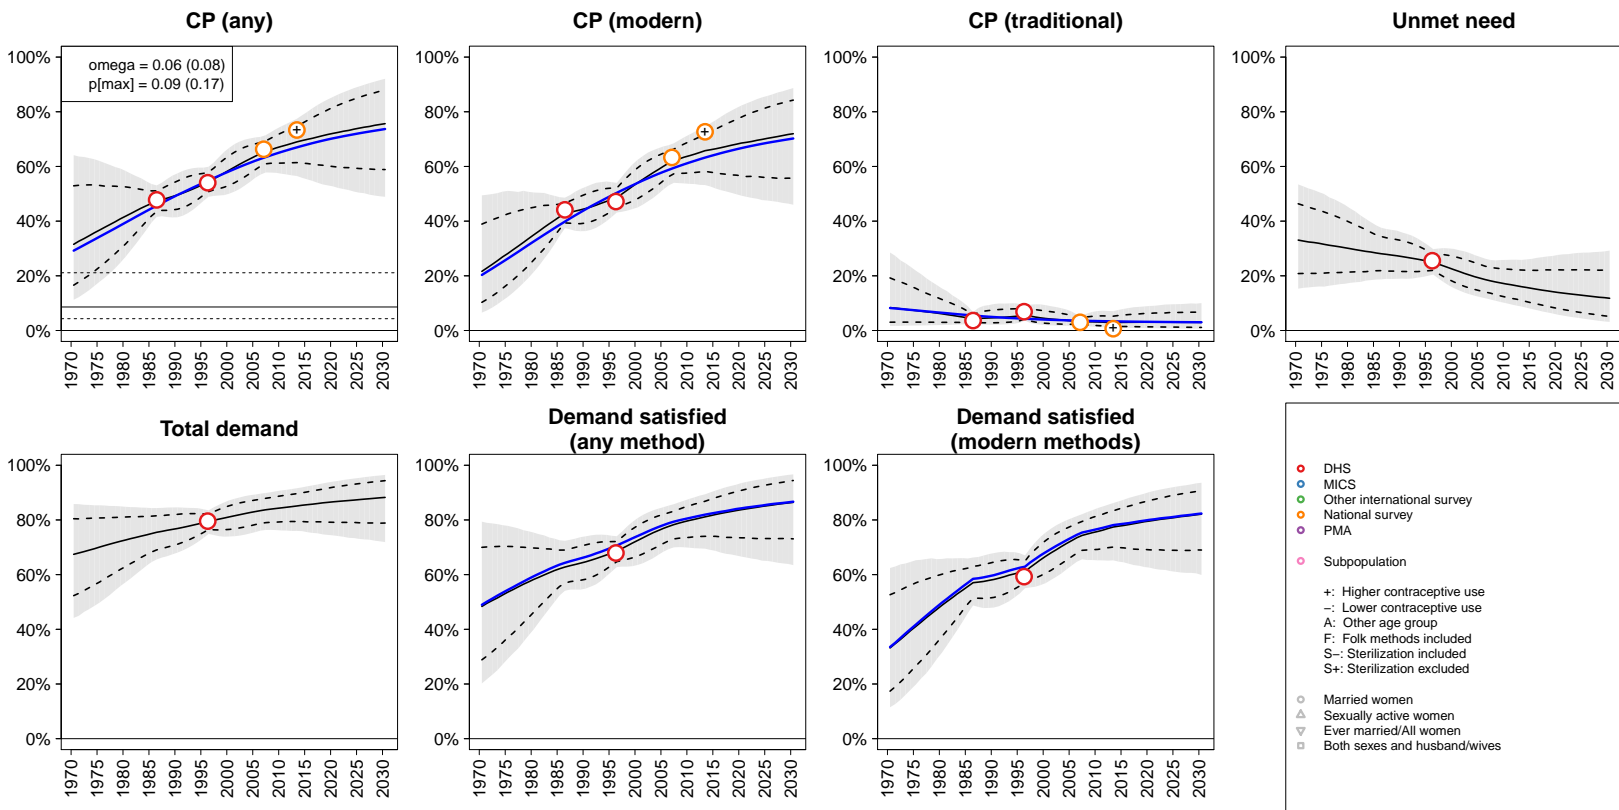

Bulgaria (Eastern Europe) --- Married / In-Union

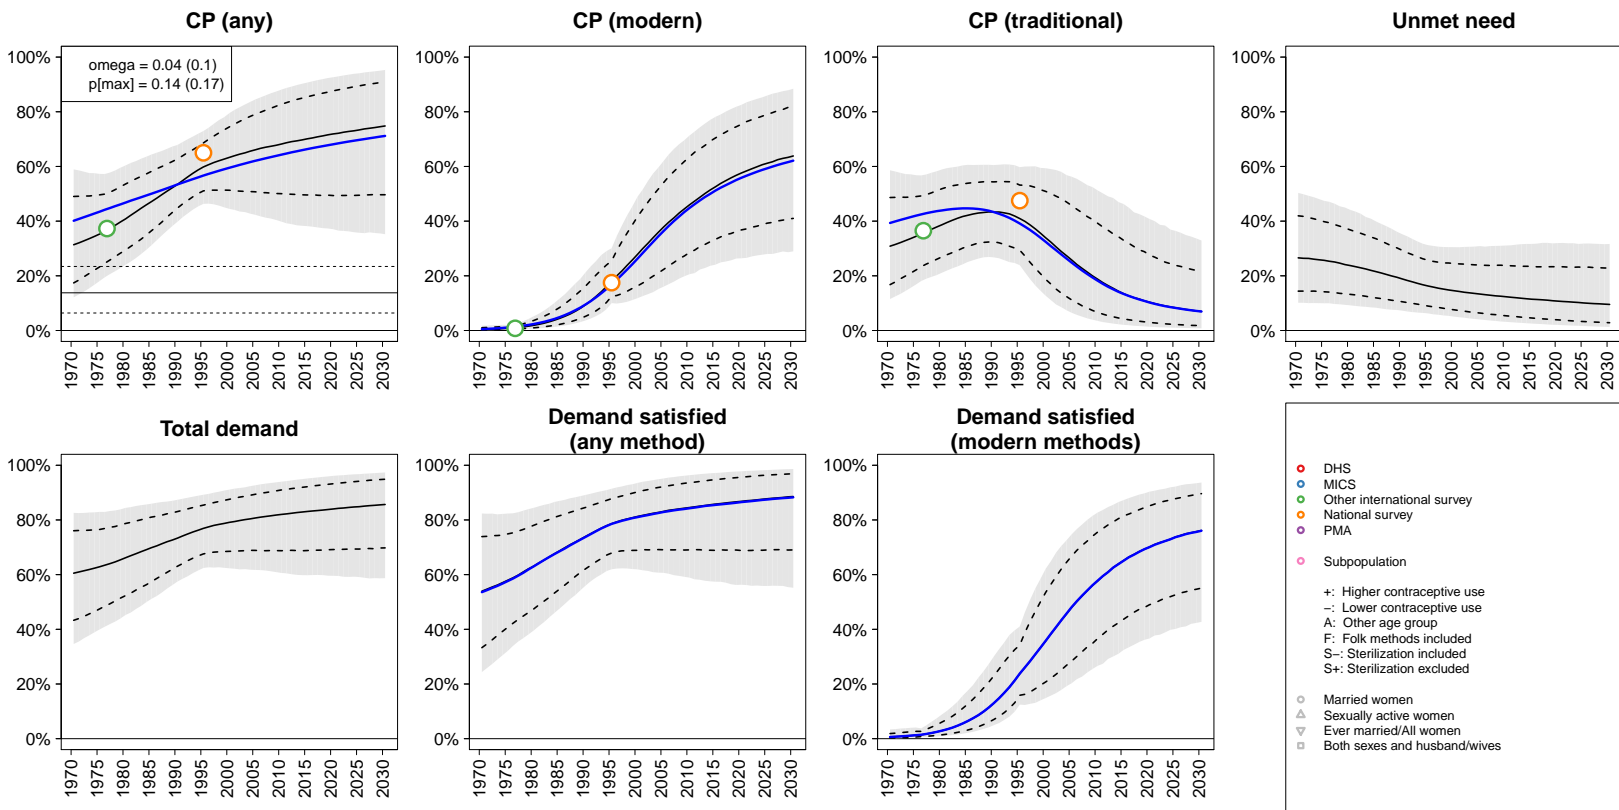

Burkina Faso (Western Africa) --- Married / In-Union

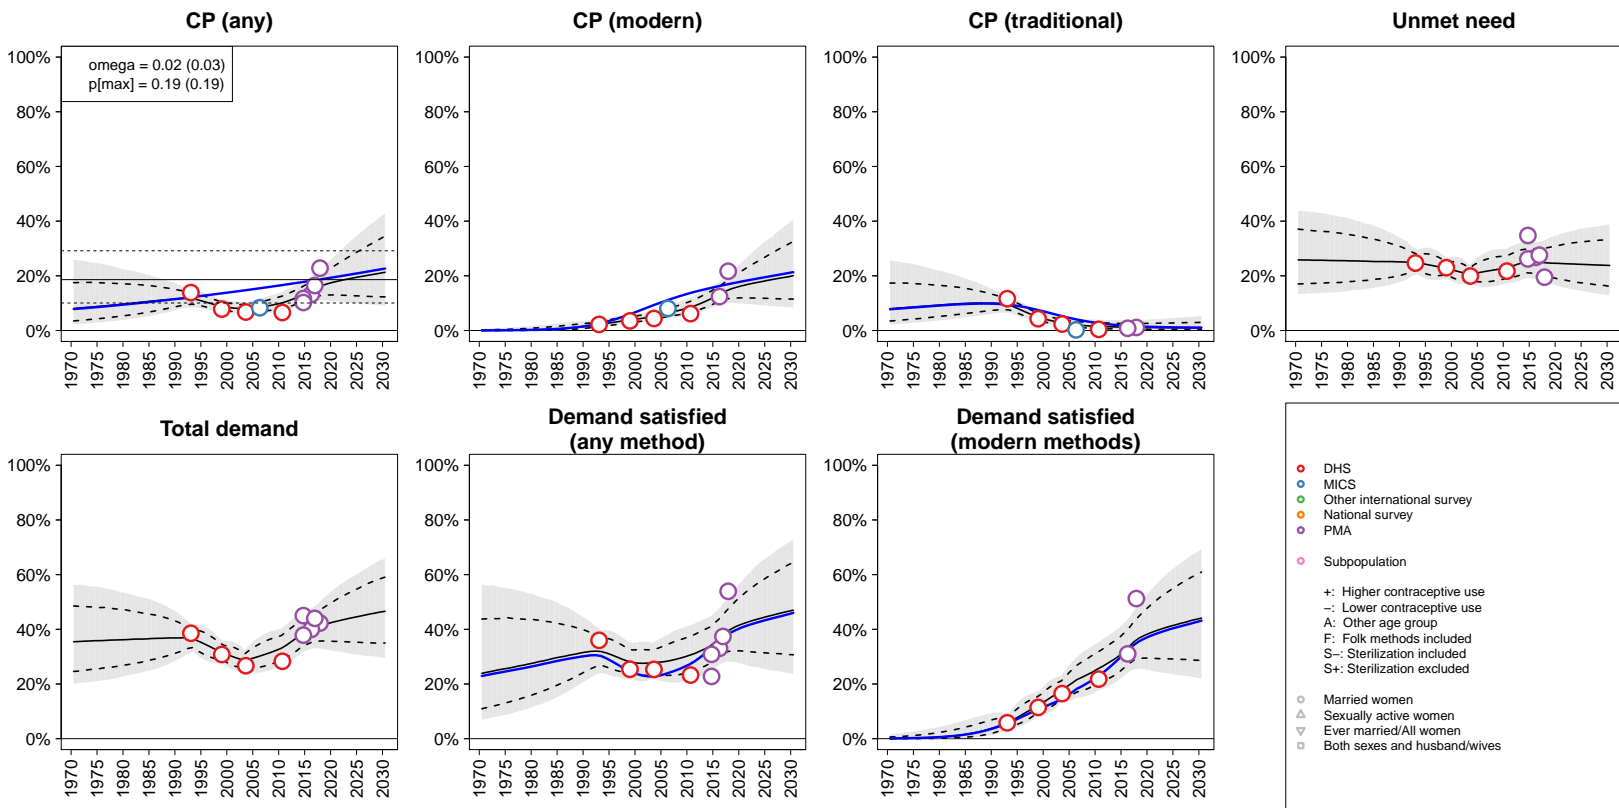

Burundi (Eastern Africa) --- Married / In-Union

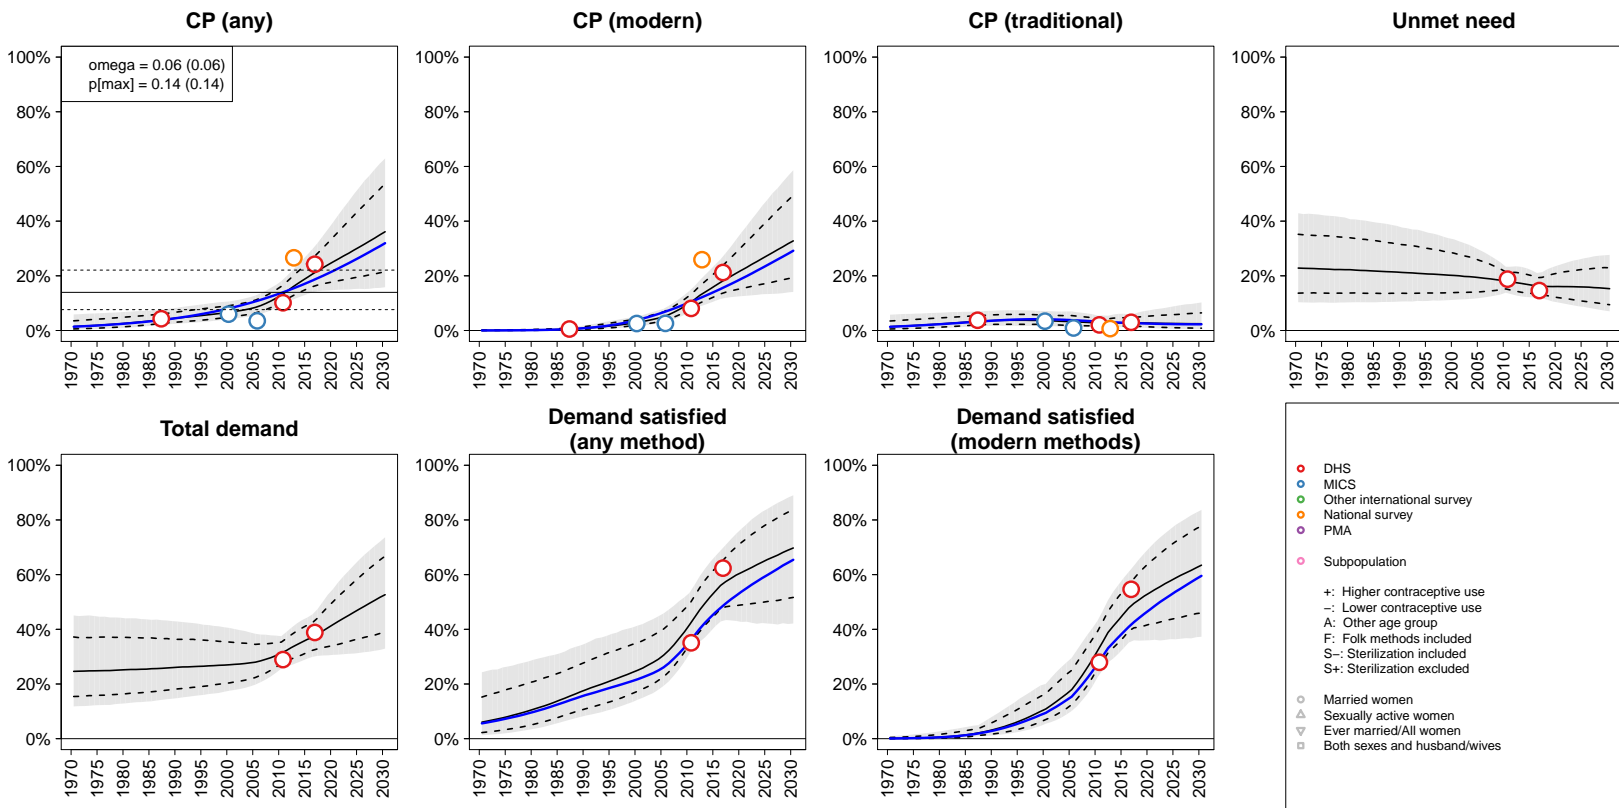

Cabo Verde (Western Africa) --- Married / In-Union

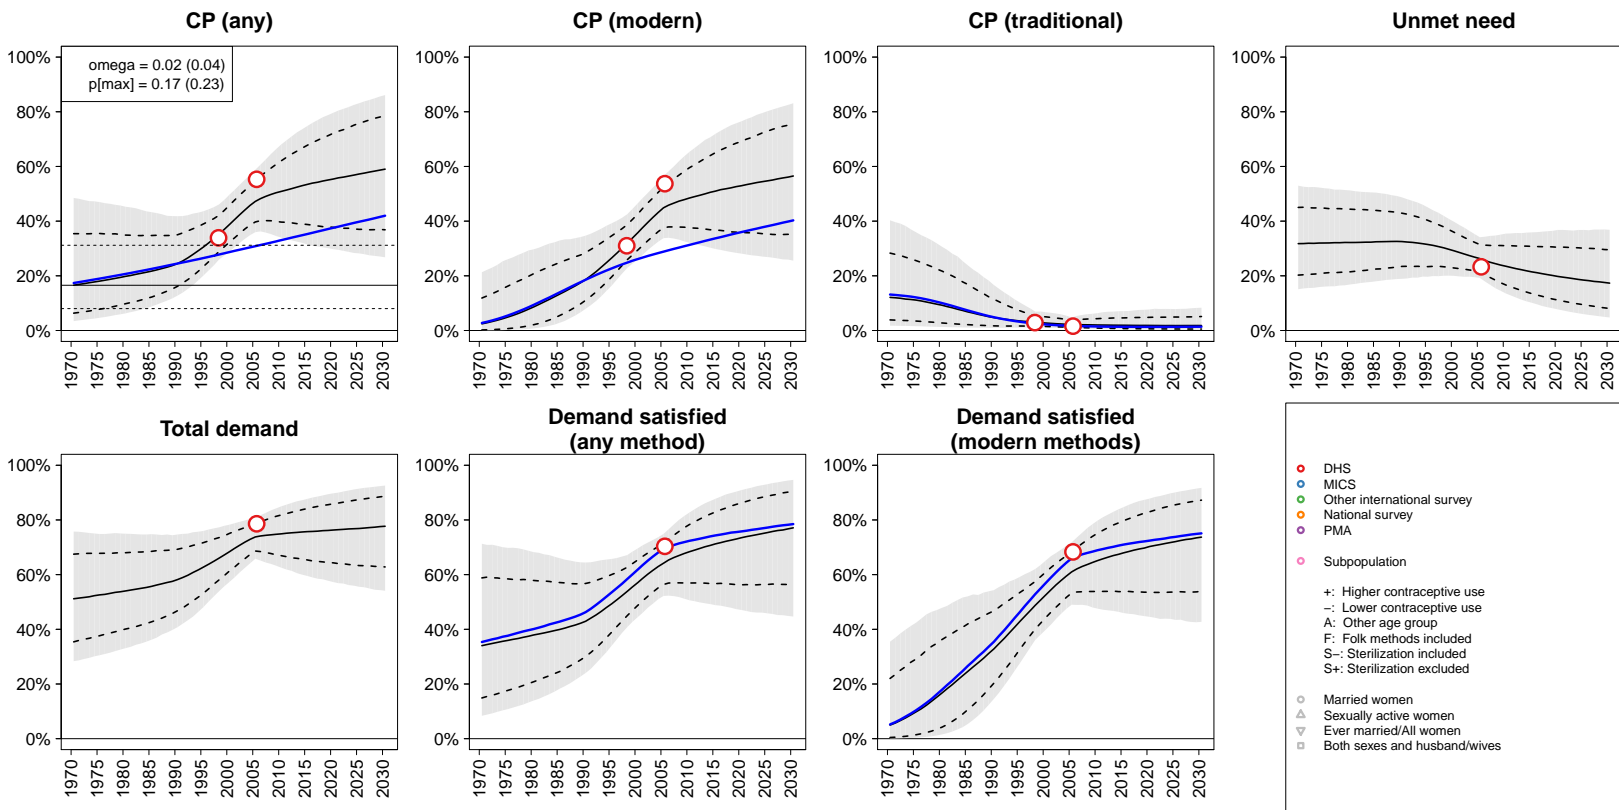



Cambodia (South-eastern Asia) --- Married / In-Union

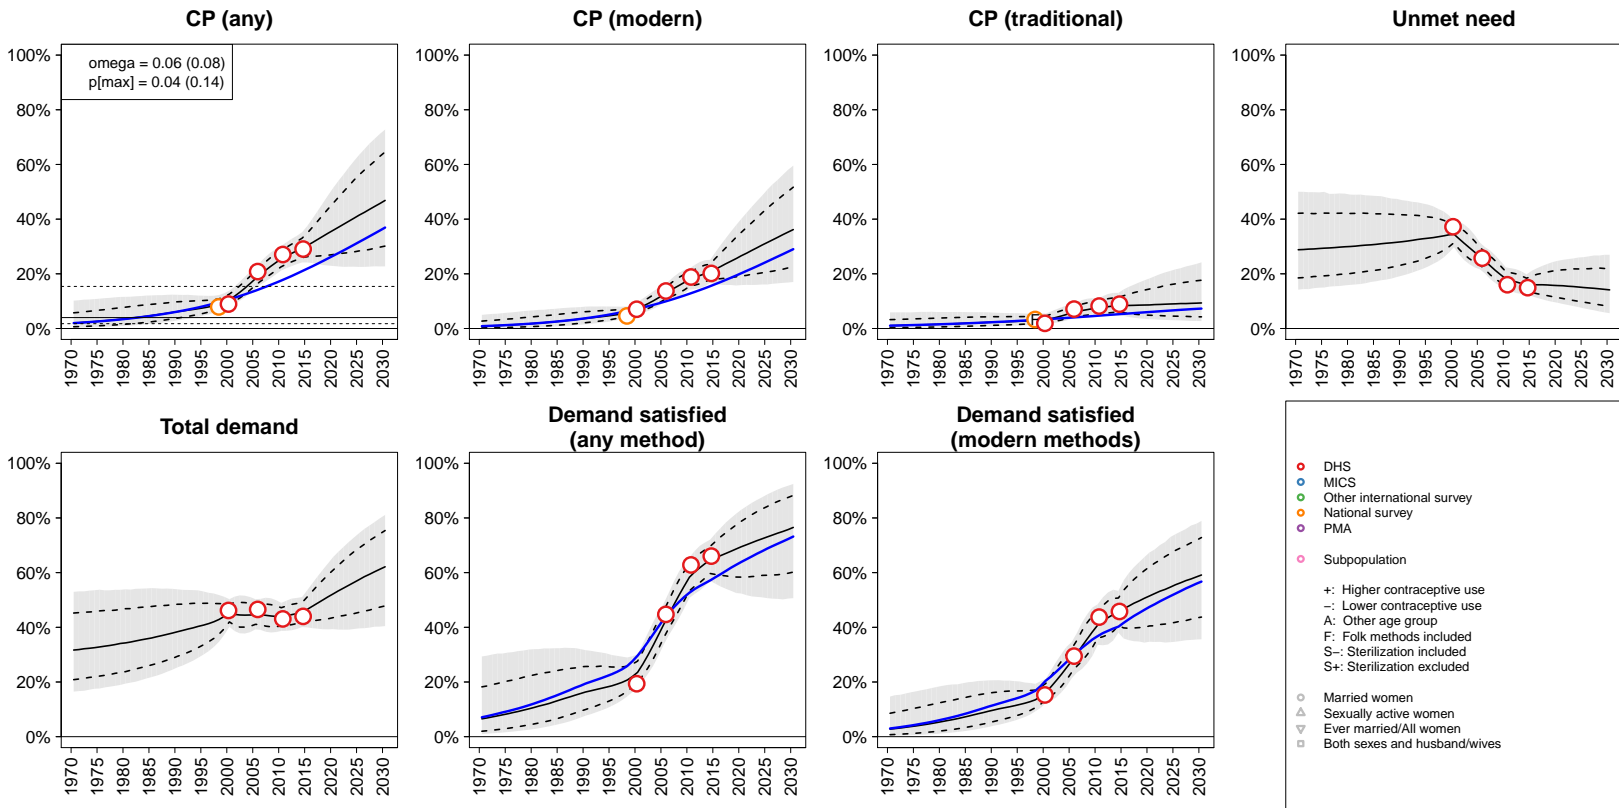

Cameroon (Middle Africa) --- Married / In-Union

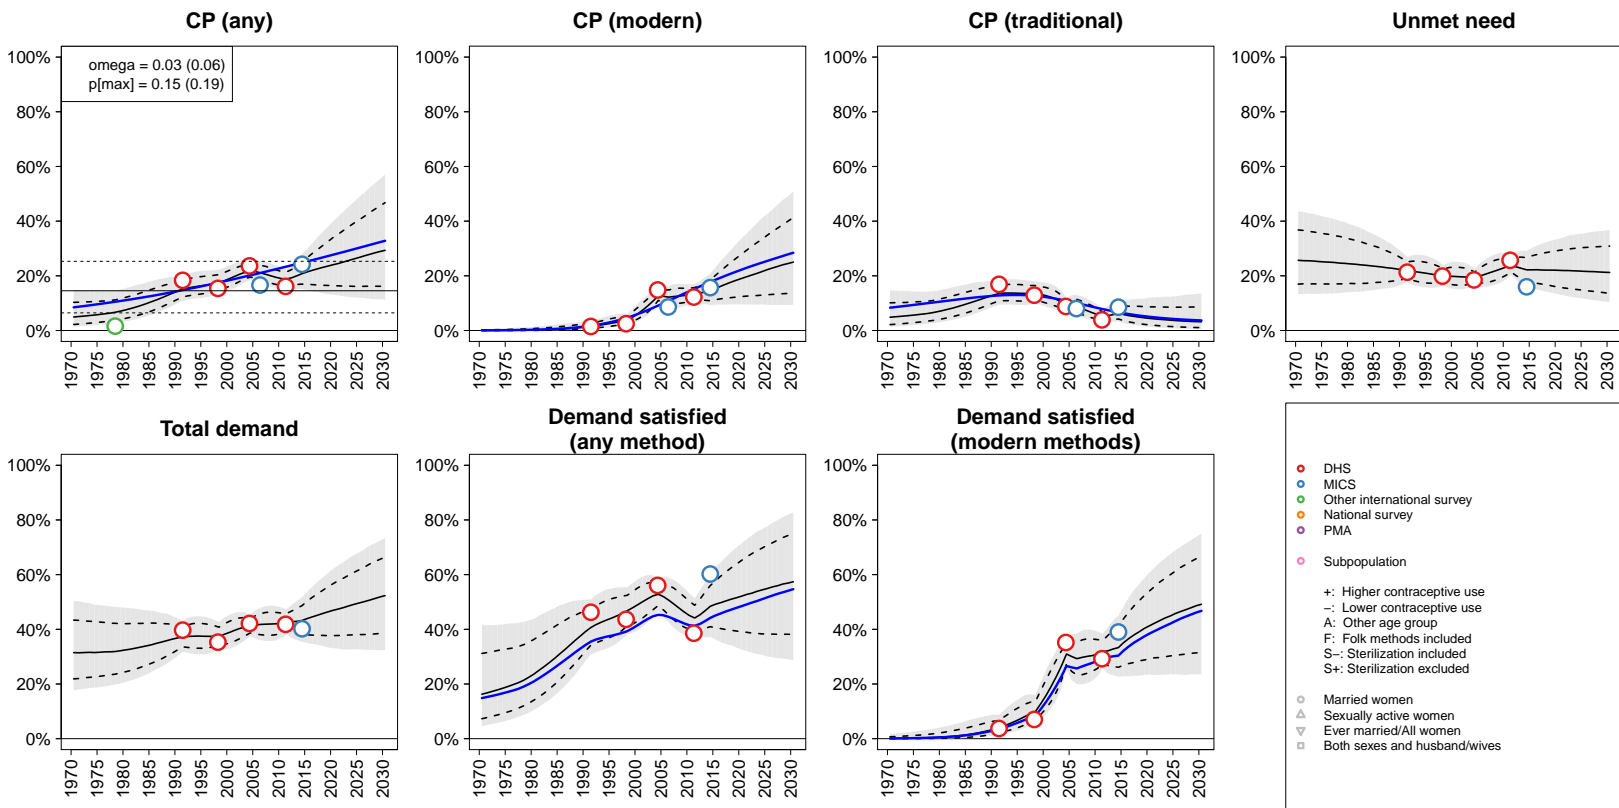

Central African Republic (Middle Africa) --- Married / In-Union

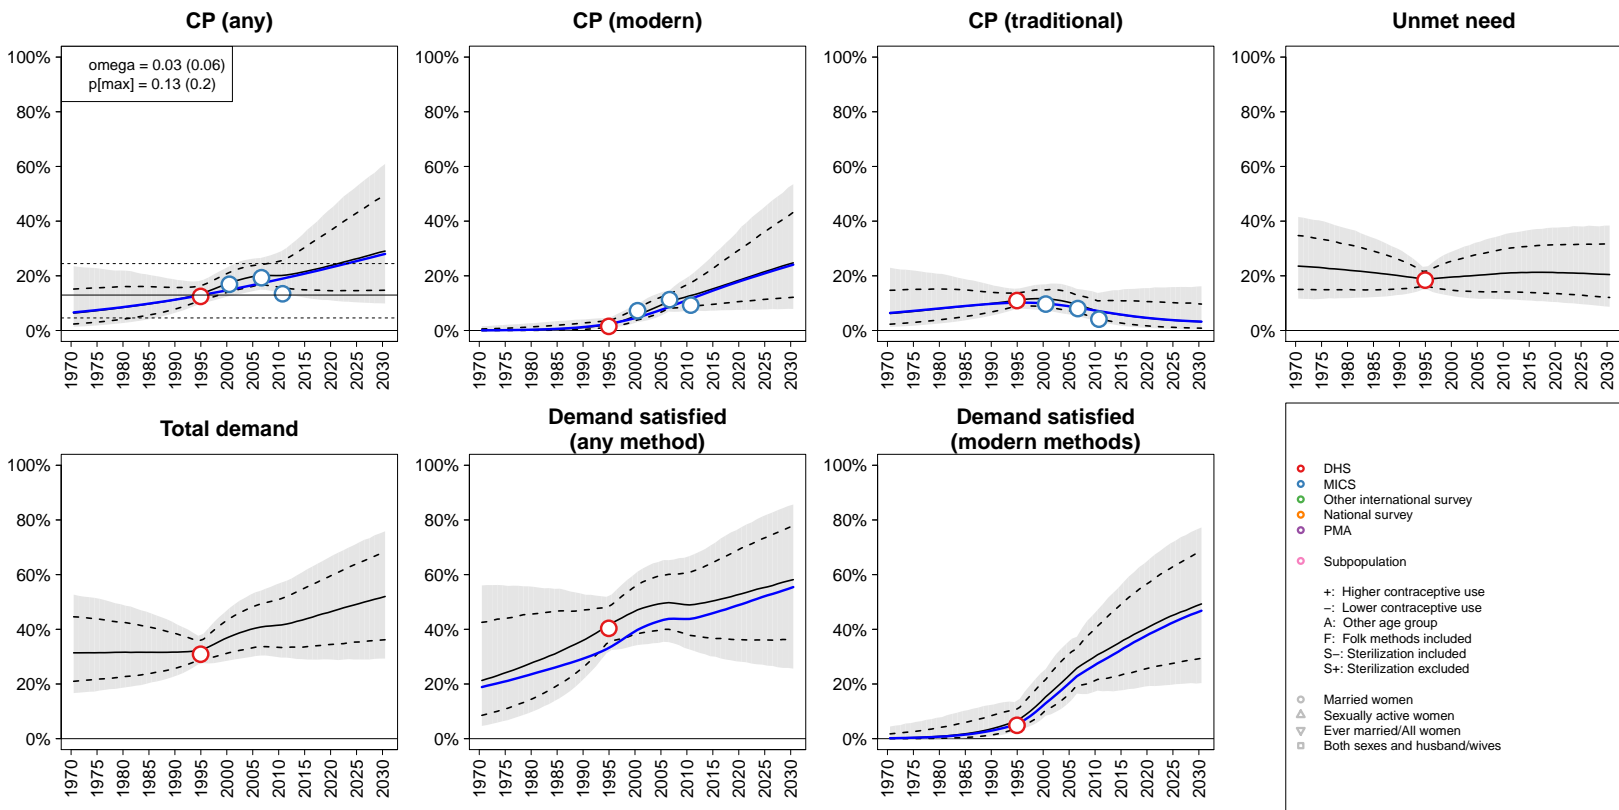

Chad (Middle Africa) --- Married / In-Union

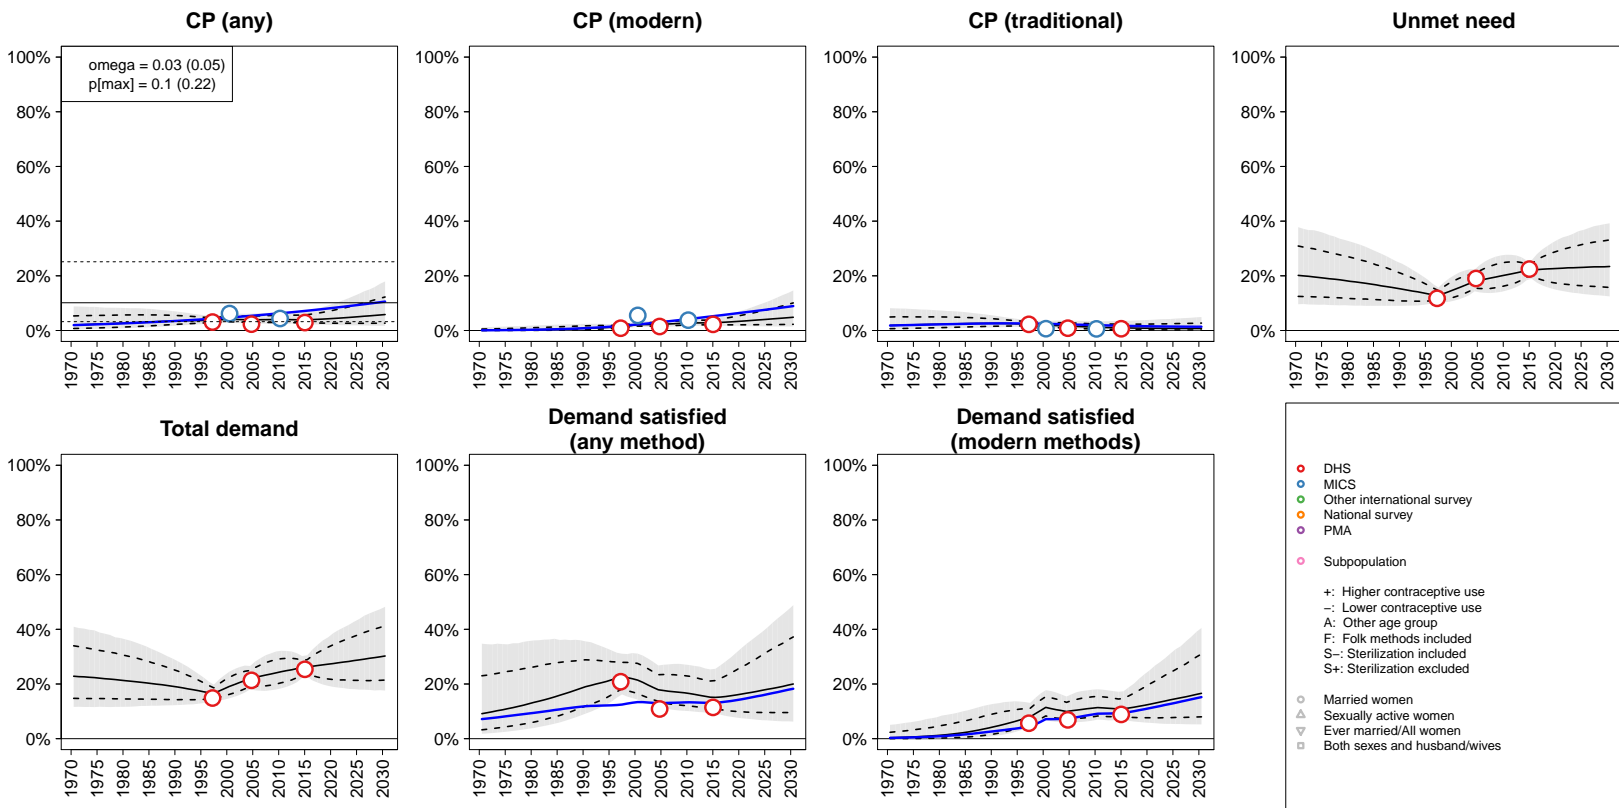

China (Eastern Asia) --- Married / In-Union

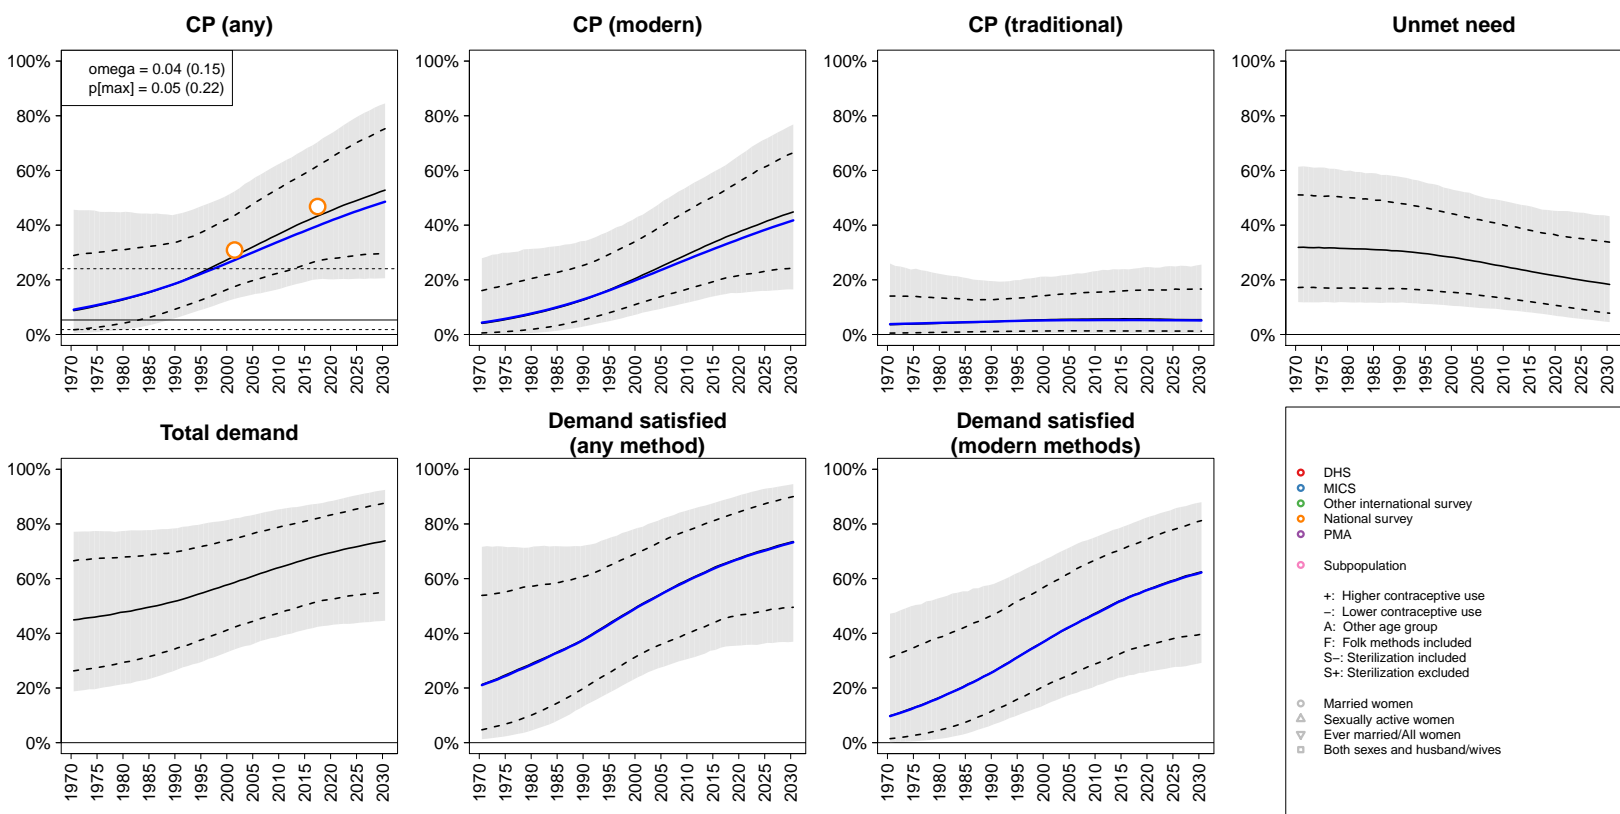

Colombia (South America) --- Married / In-Union

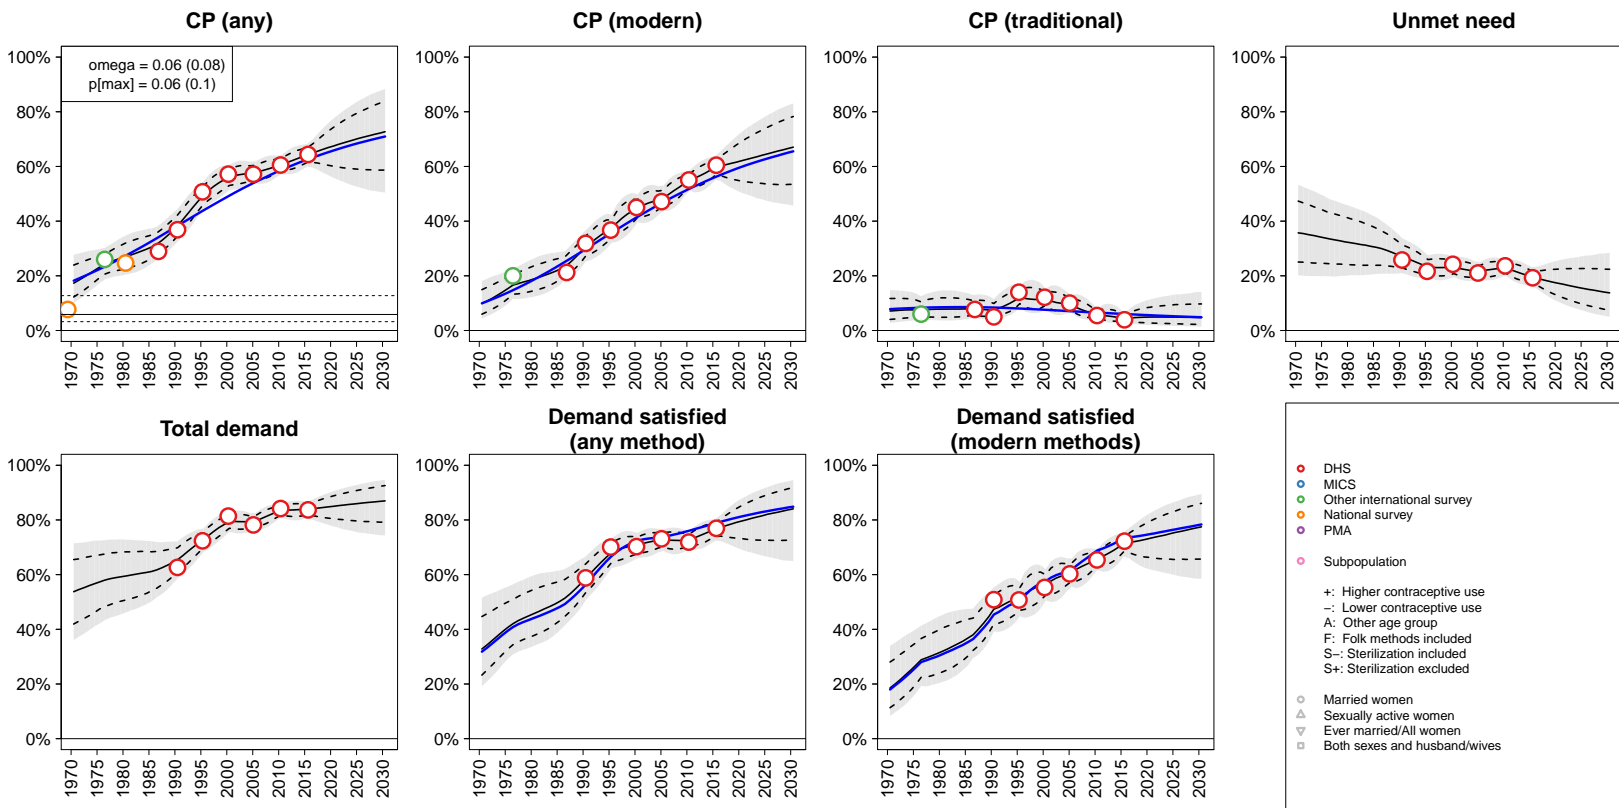

Comoros (Eastern Africa) --- Married / In-Union

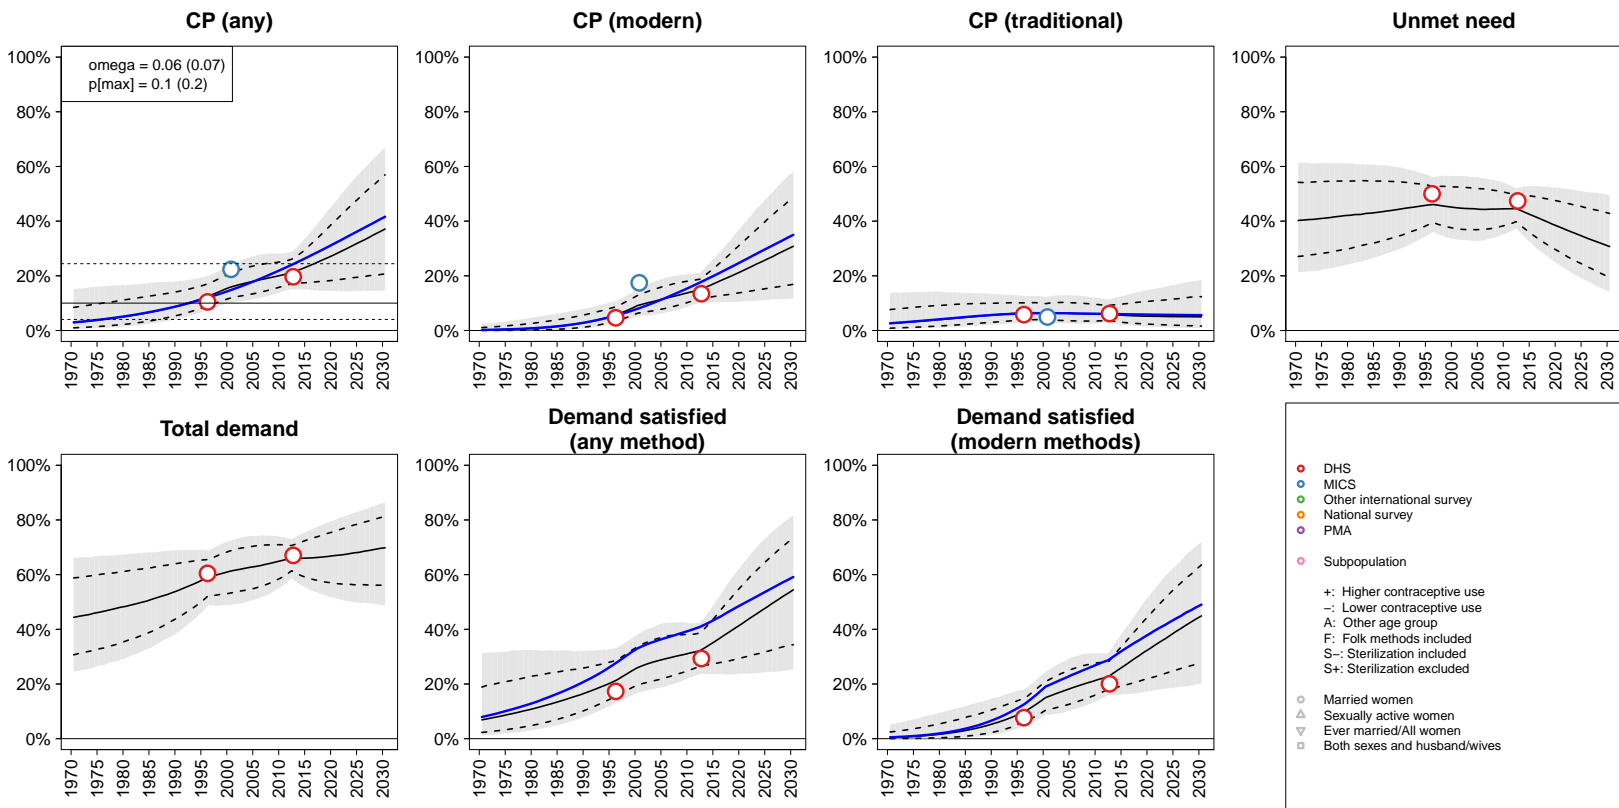

Congo (Middle Africa) — Married / In-Union

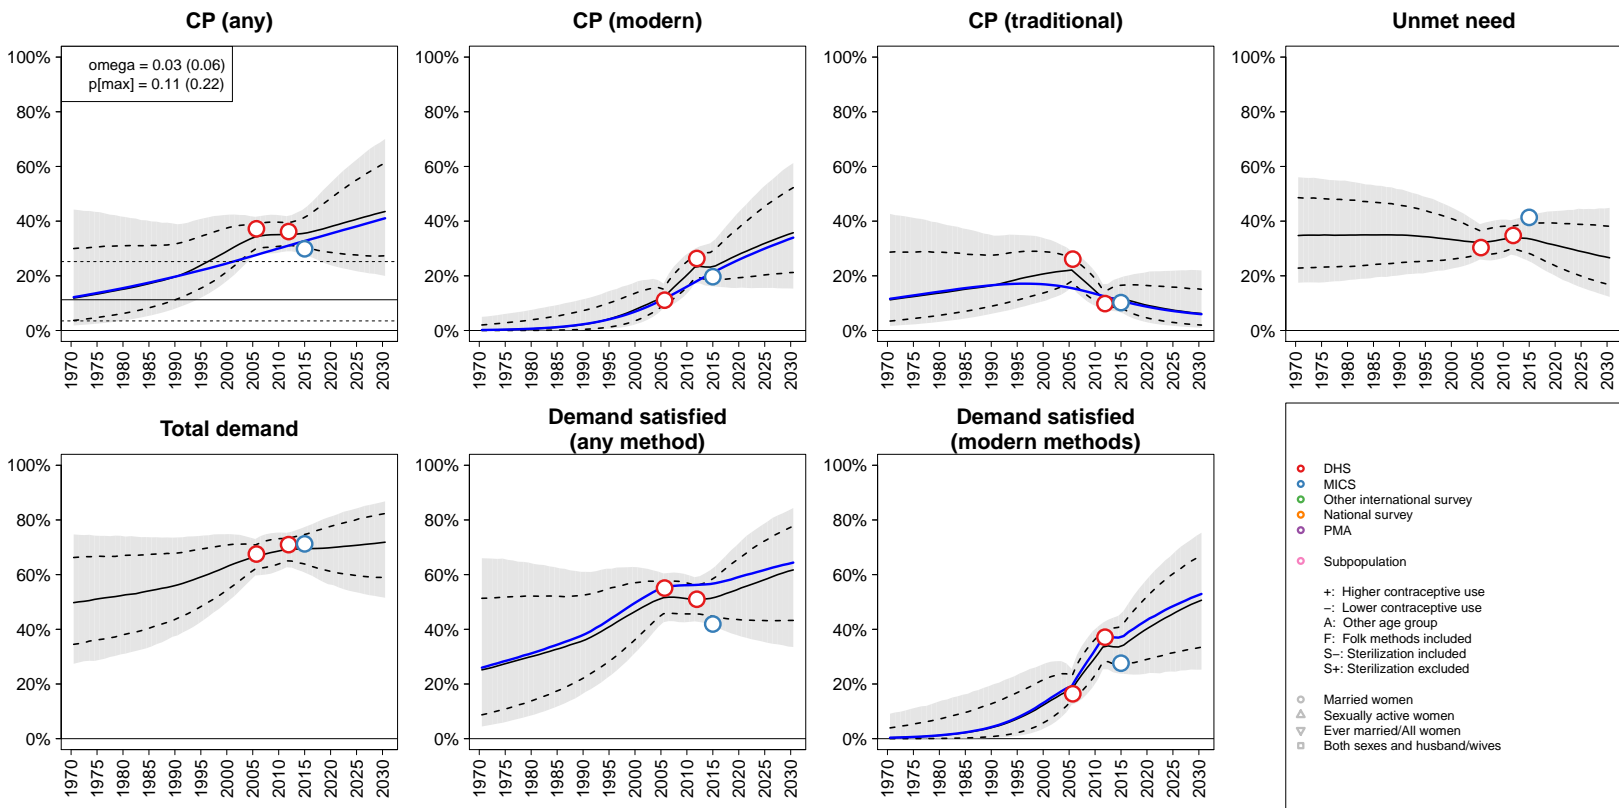



Costa Rica (Central America) --- Married / In-Union

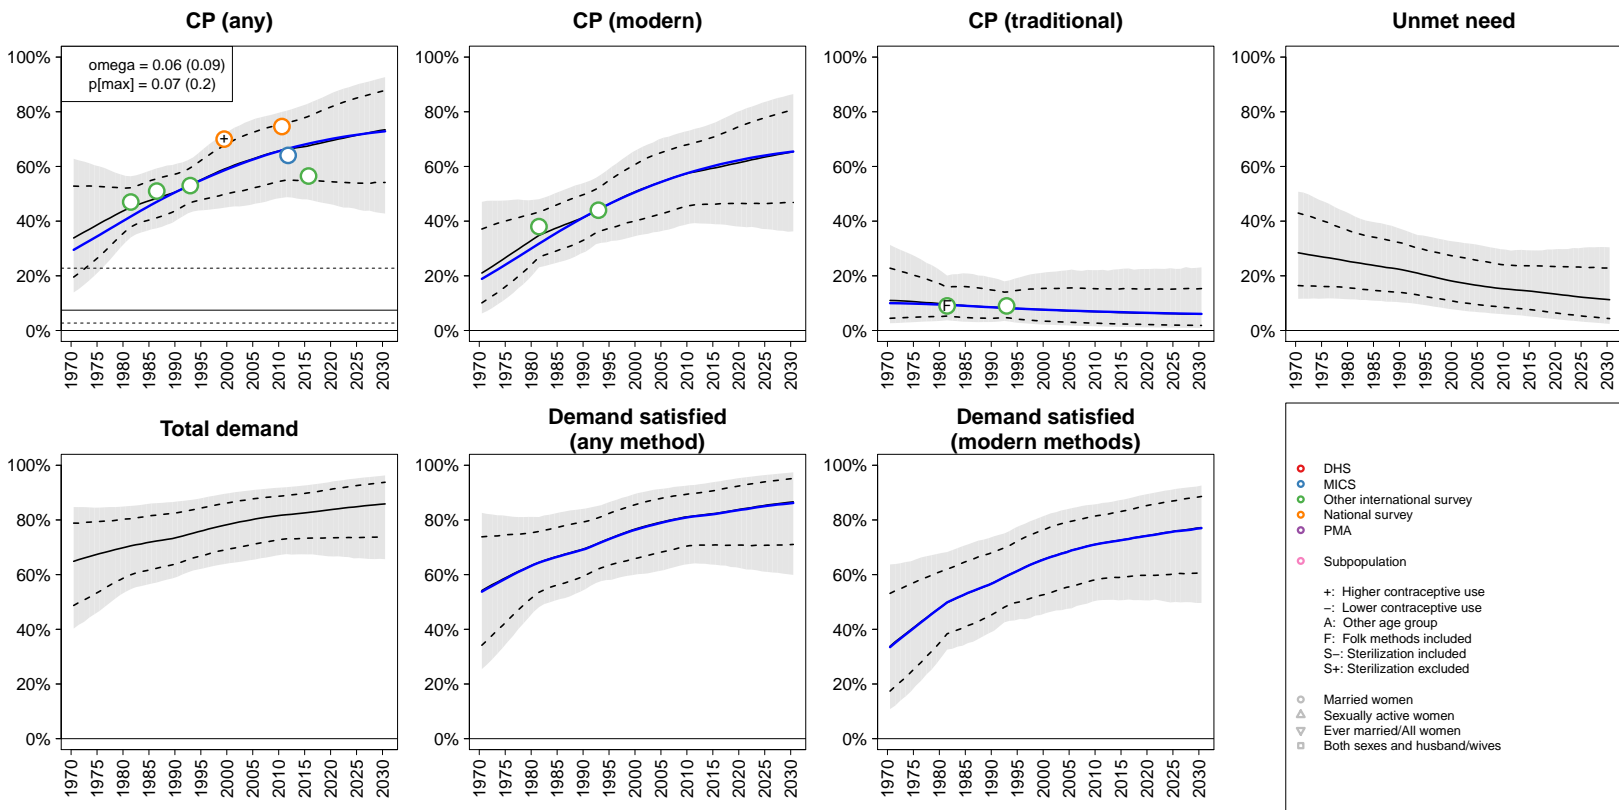

Côte d'Ivoire (Western Africa) --- Married / In-Union

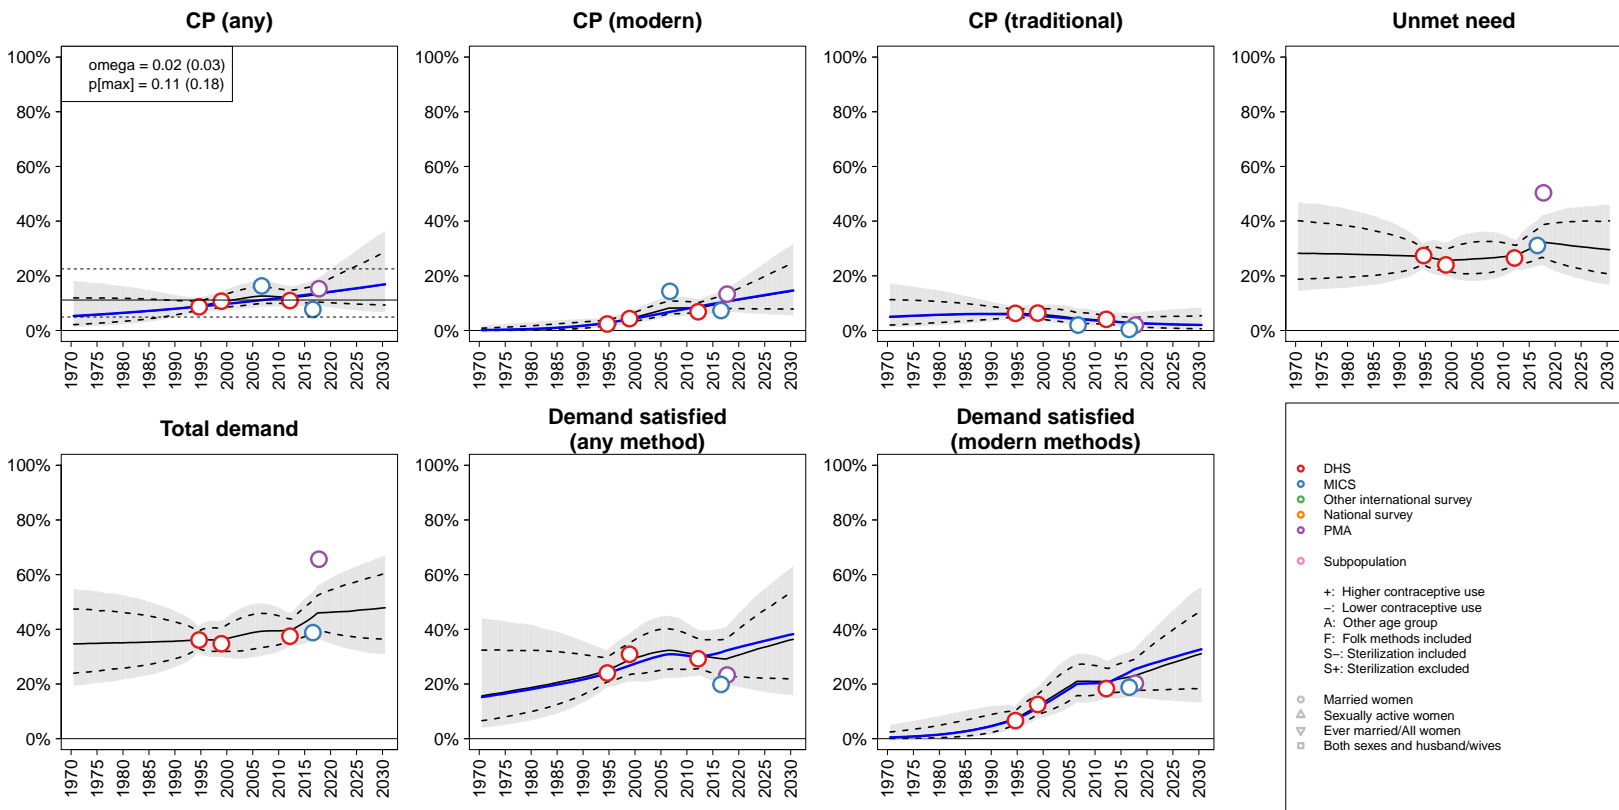

Cuba (Caribbean) --- Married / In-Union

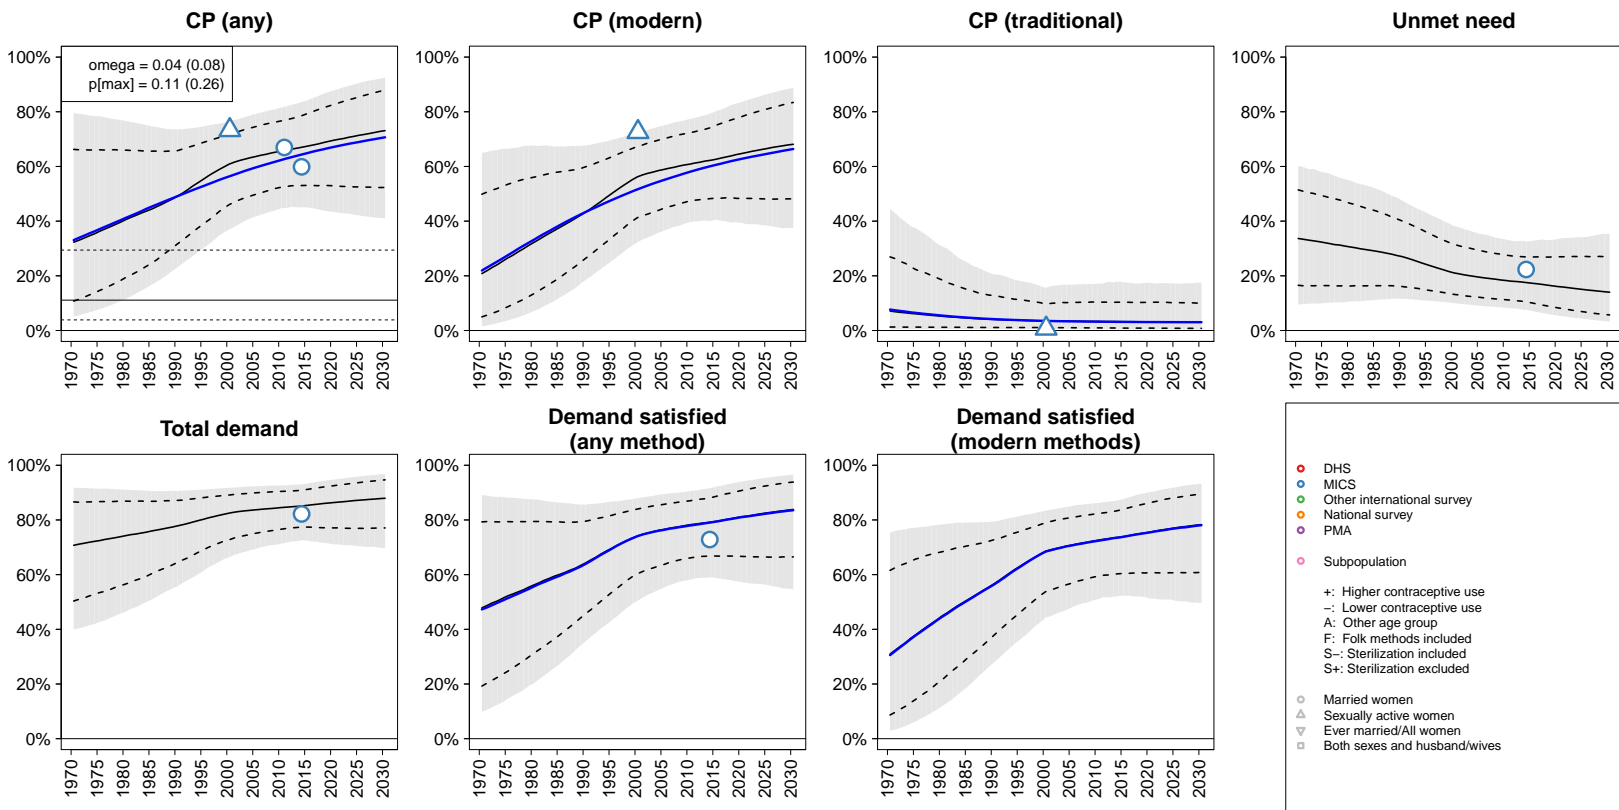

Czechia (Eastern Europe) --- Married / In-Union

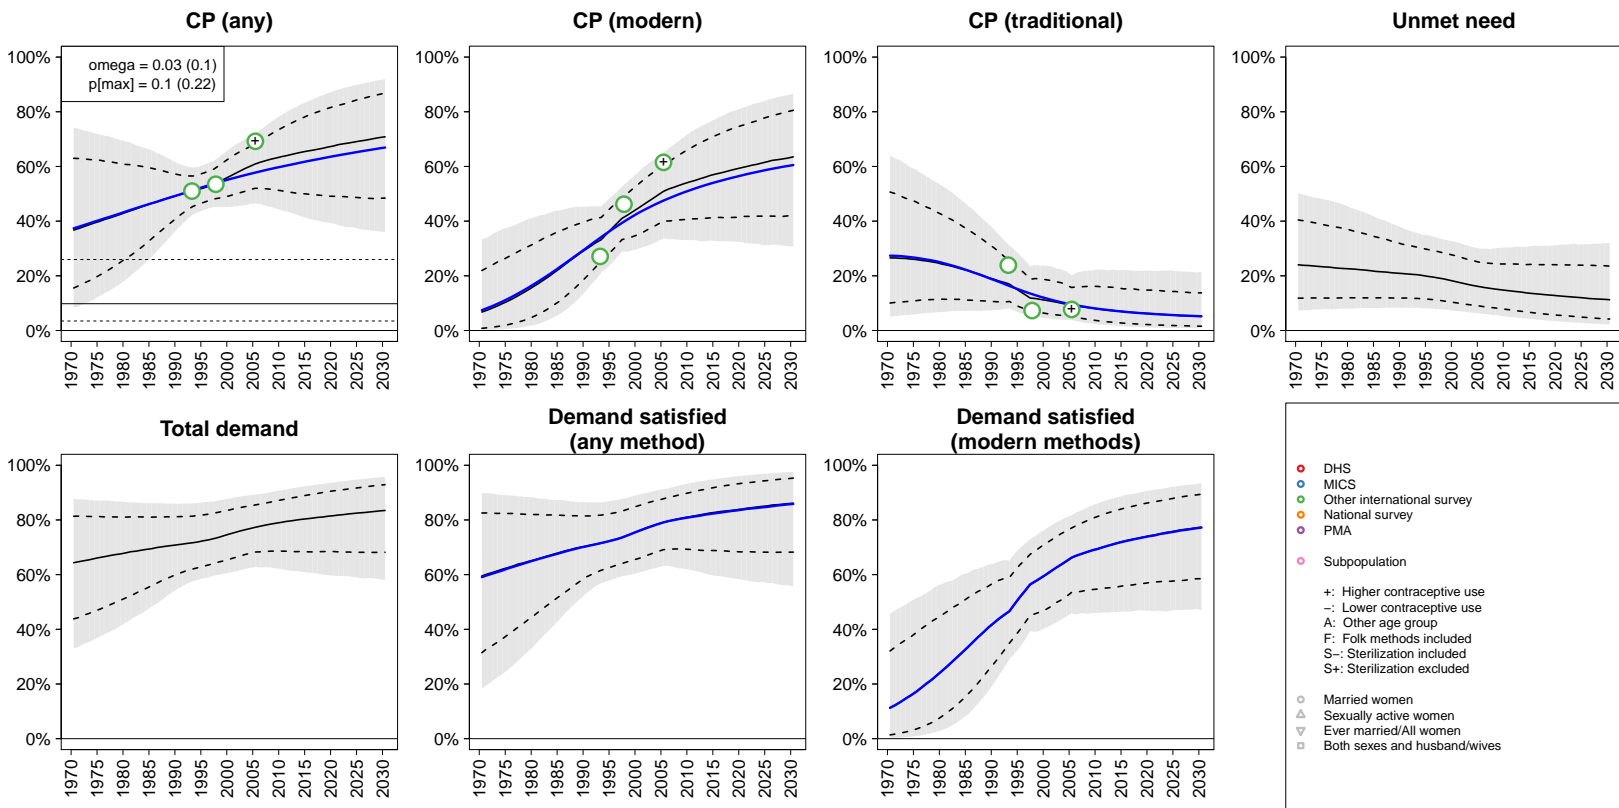

Democratic Rep. of the Congo (Middle Africa) --- Married / In-Union

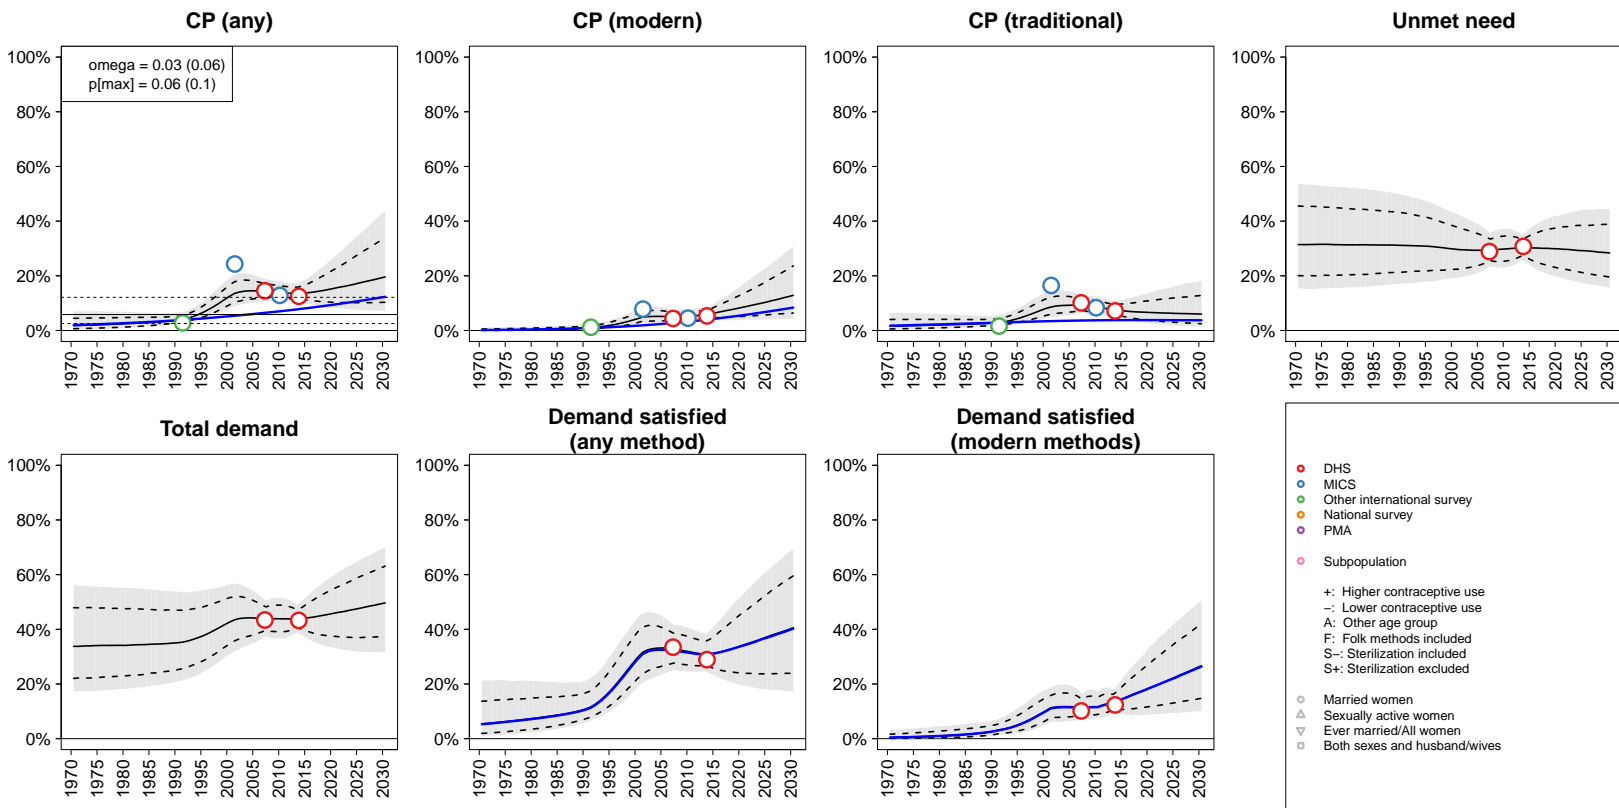

Democratic Republic of Timor-Leste (South-eastern Asia) --- Married / In-Union

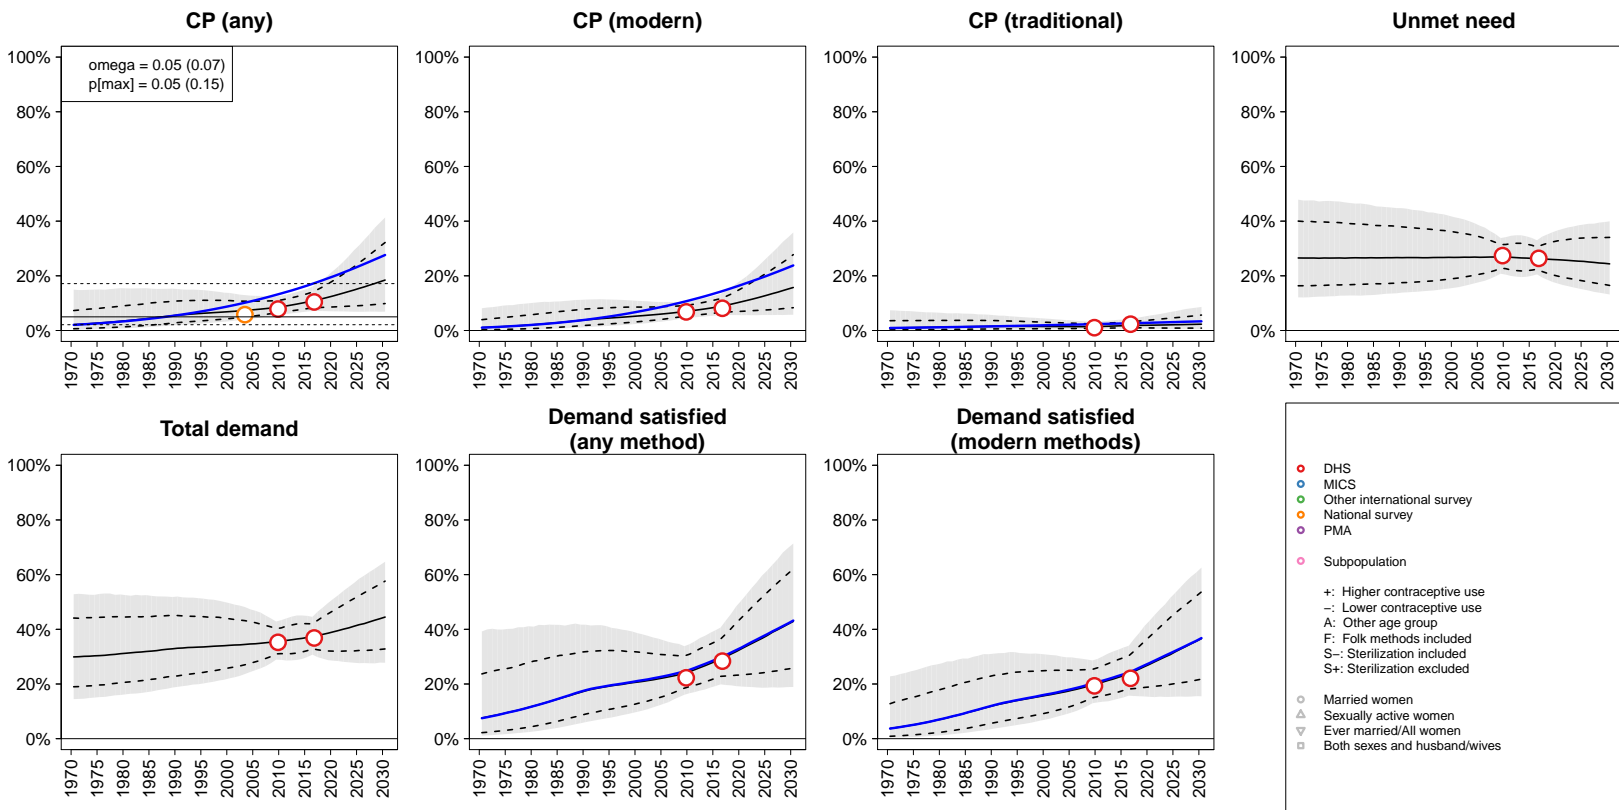

Djibouti (Eastern Africa) --- Married / In-Union

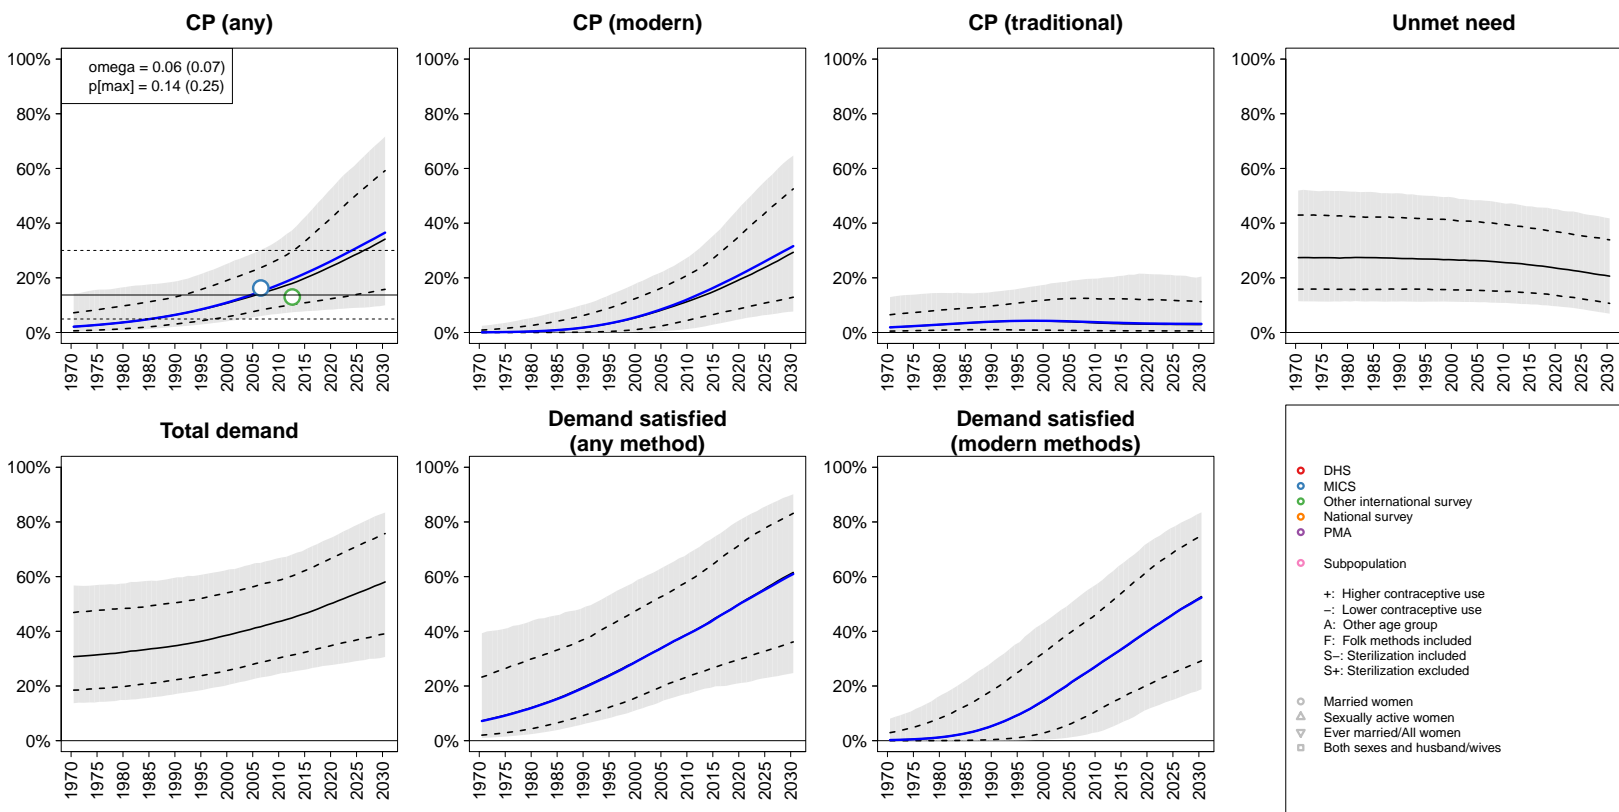

Dominica (Caribbean) --- Married / In-Union

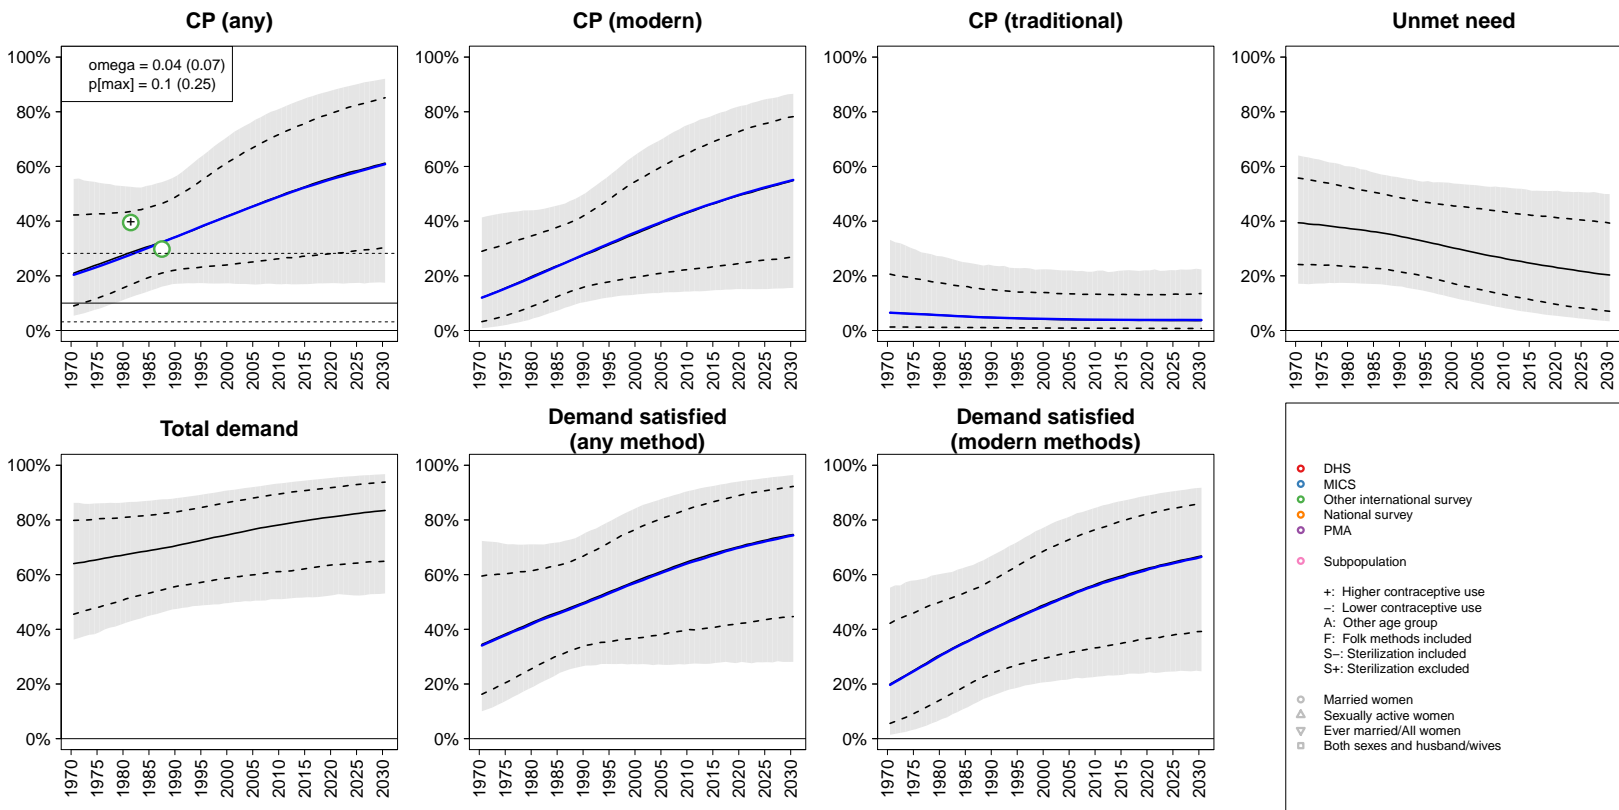



Dominican Republic (Caribbean) — Married / In-Union

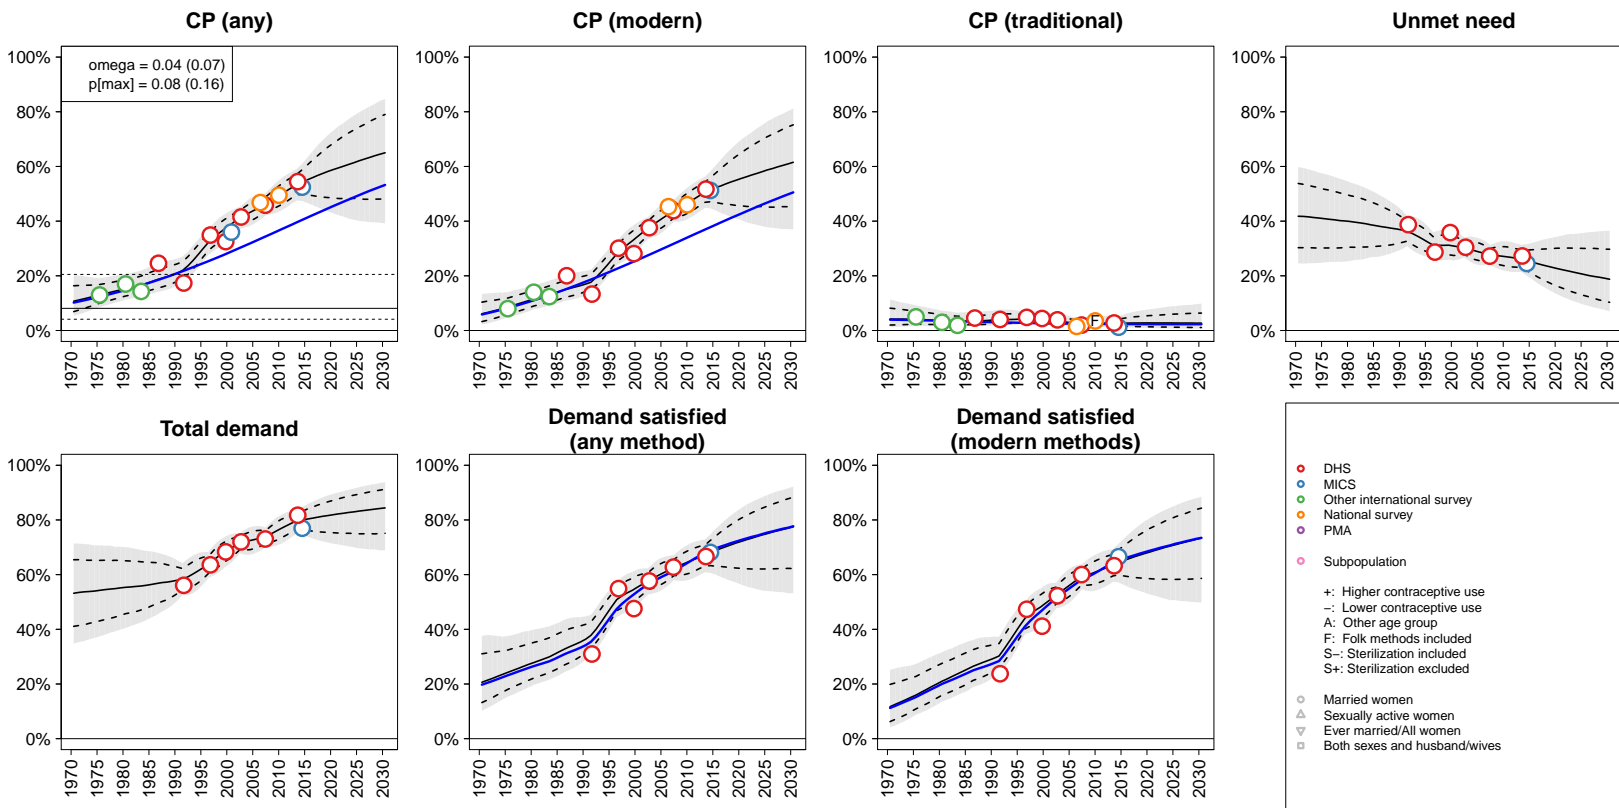

Ecuador (South America) --- Married / In-Union

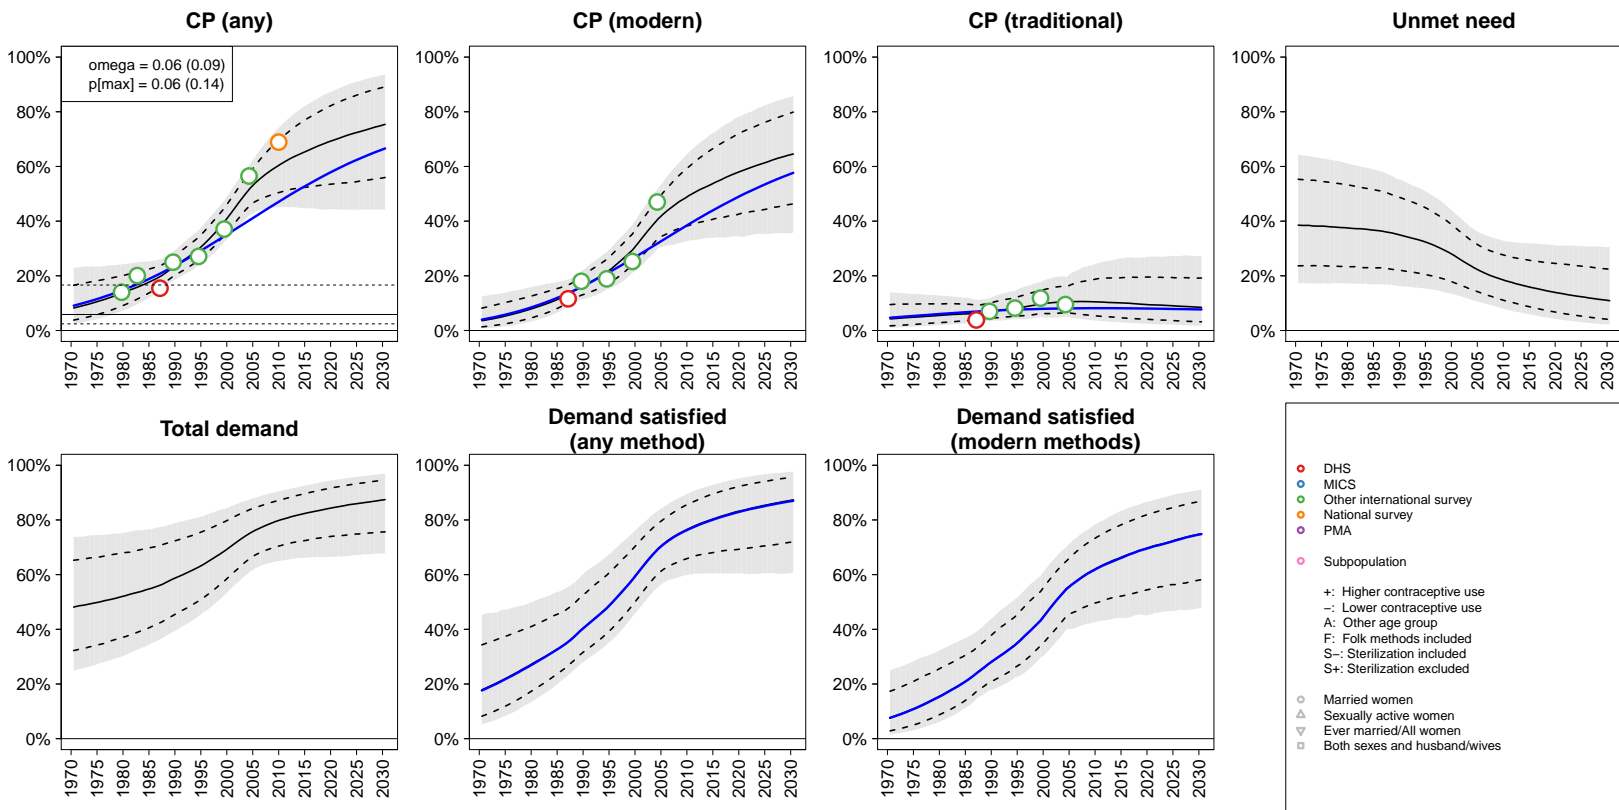

Egypt (Northern Africa) --- Married / In-Union

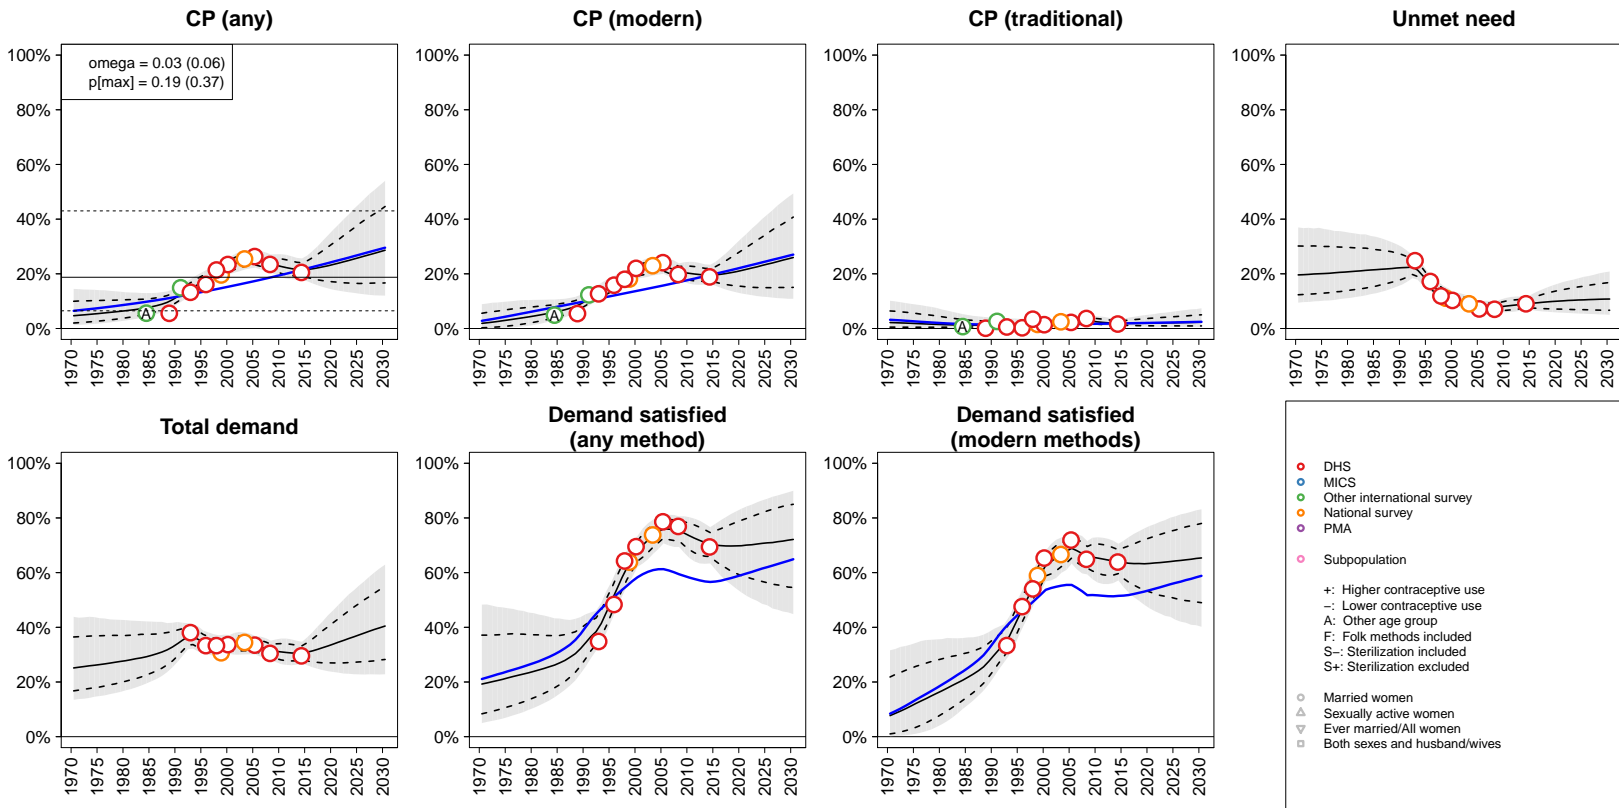

El Salvador (Central America) — Married / In-Union

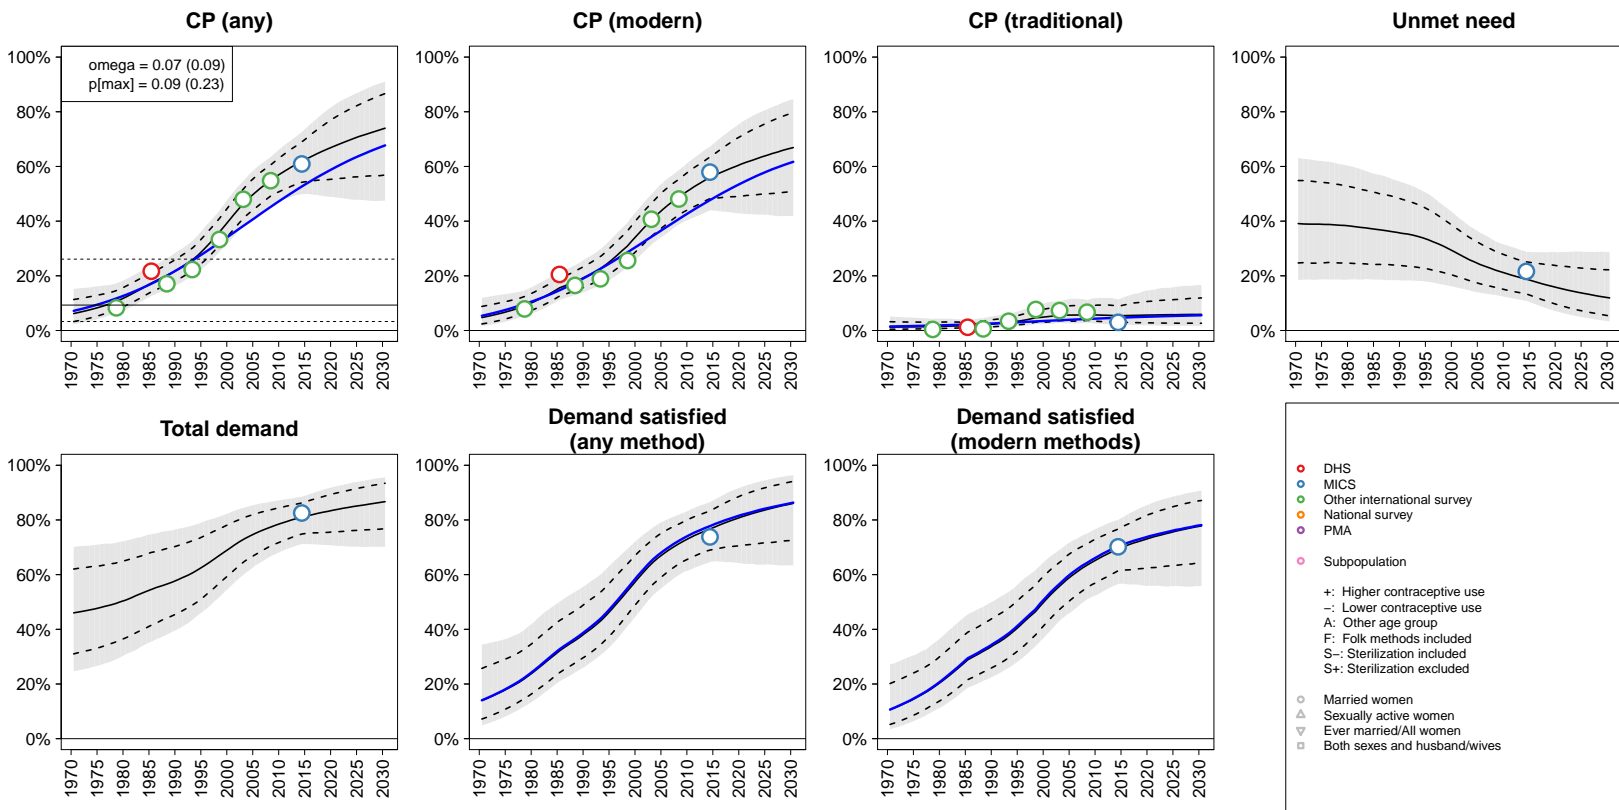

Equatorial Guinea (Middle Africa) --- Married / In-Union

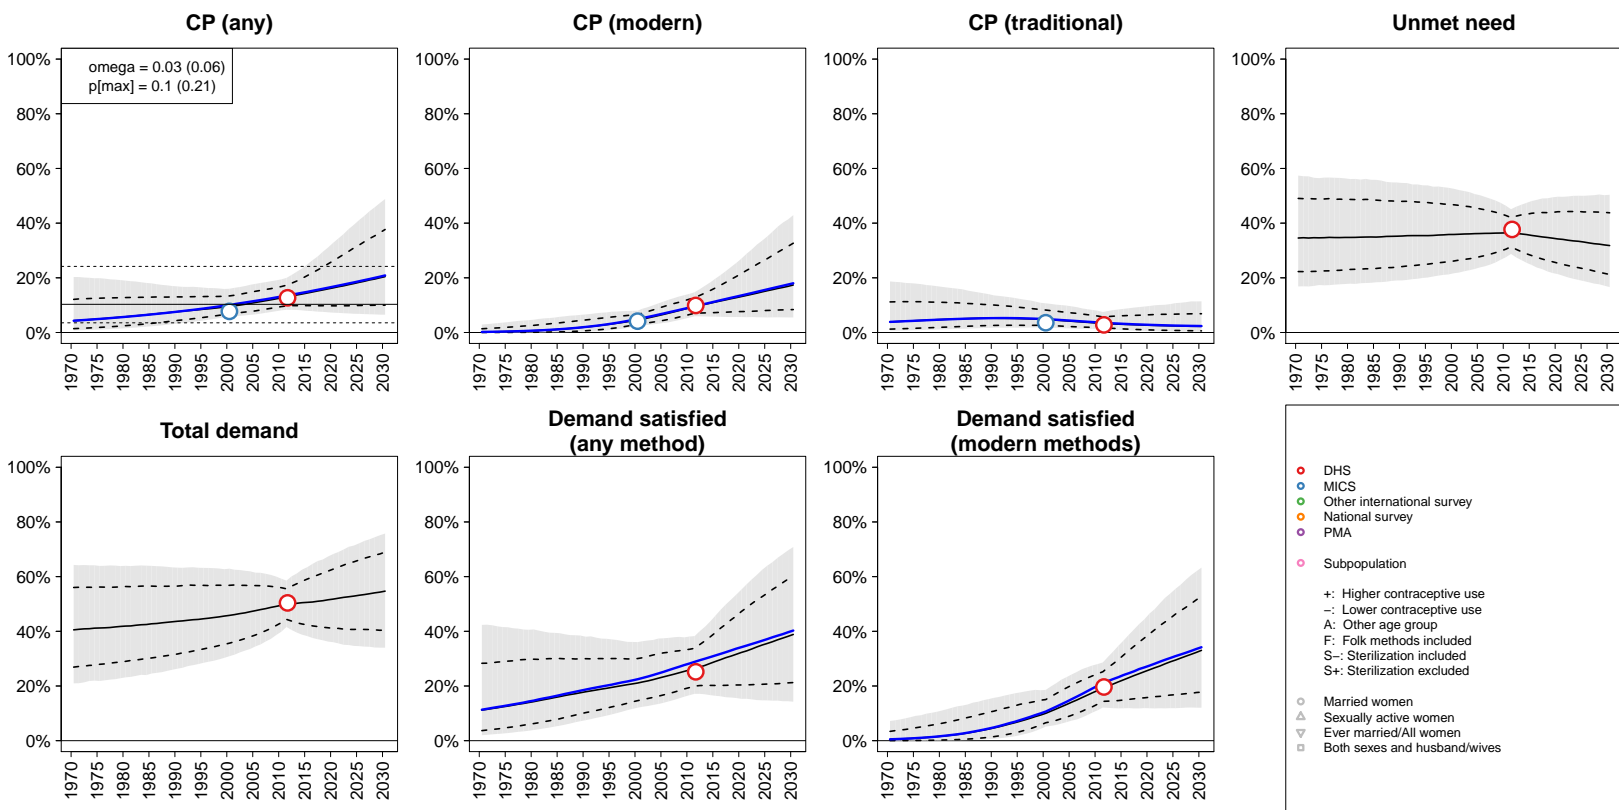

Eritrea (Eastern Africa) --- Married / In-Union

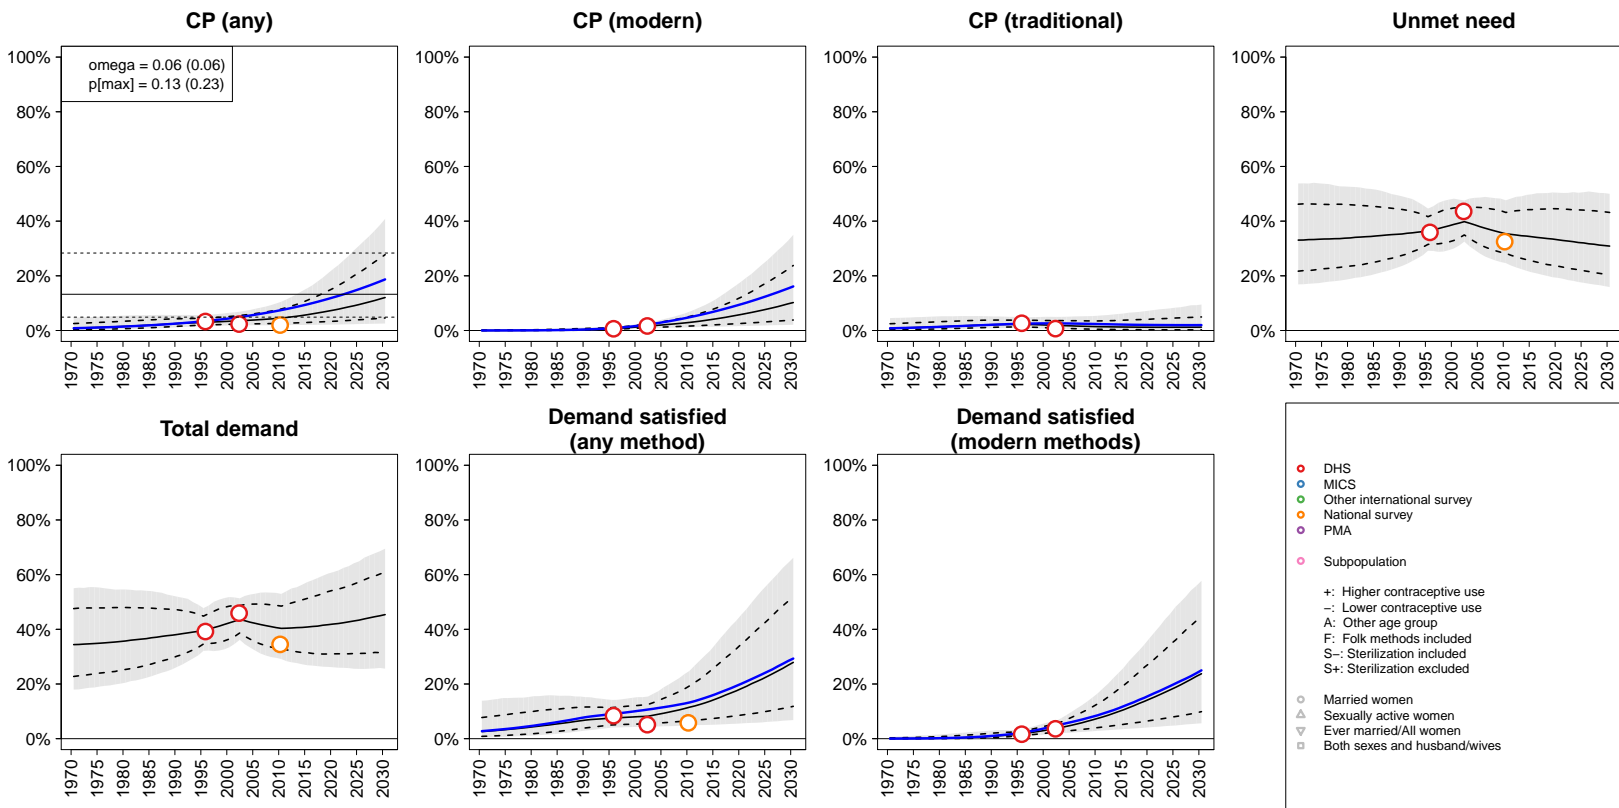

Eswatini (Southern Africa) --- Married / In-Union

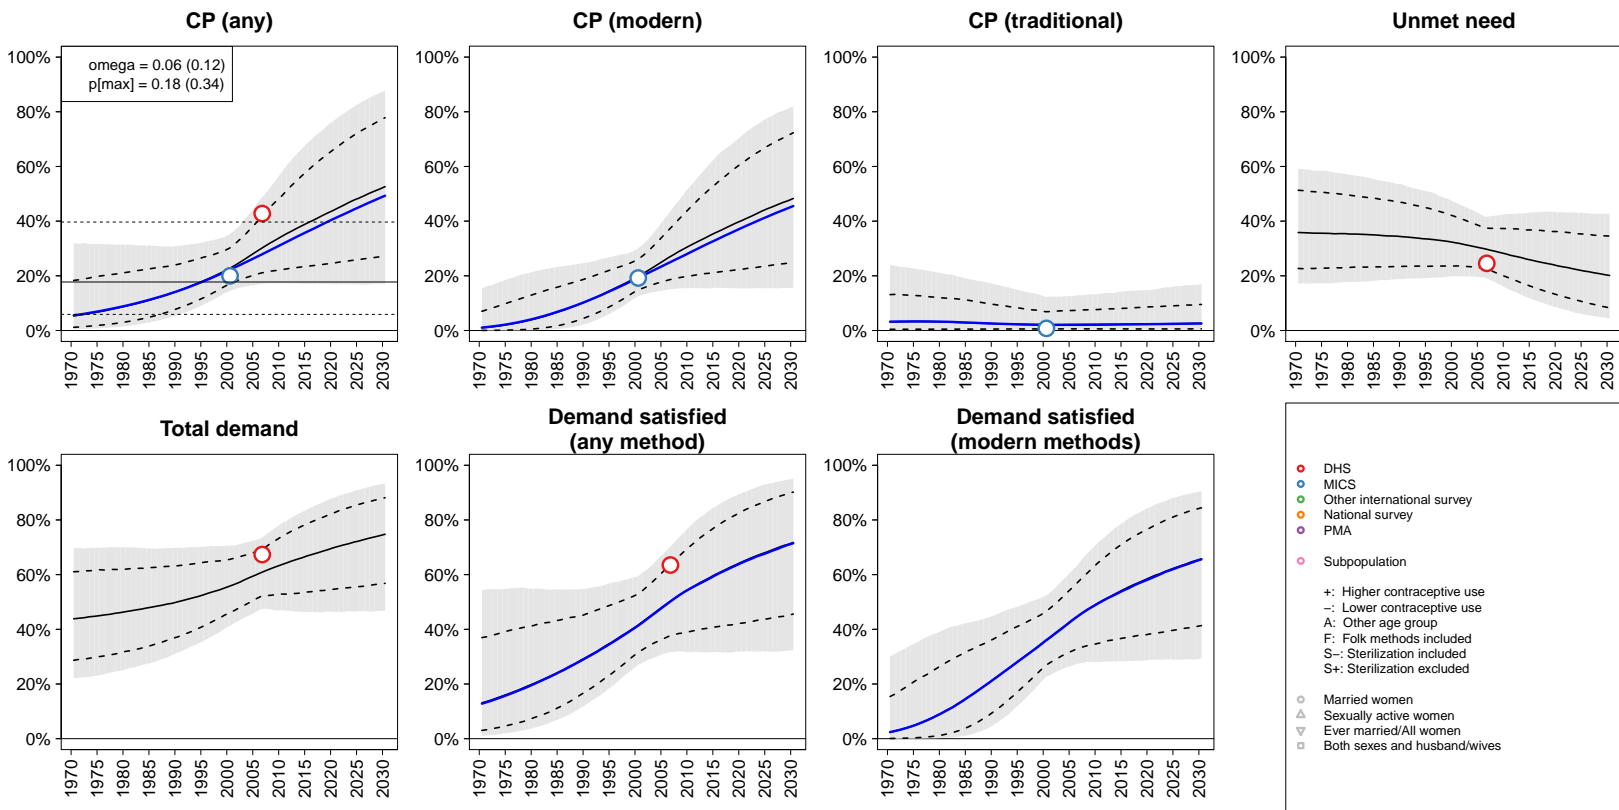

Ethiopia (Eastern Africa) — Married / In-Union

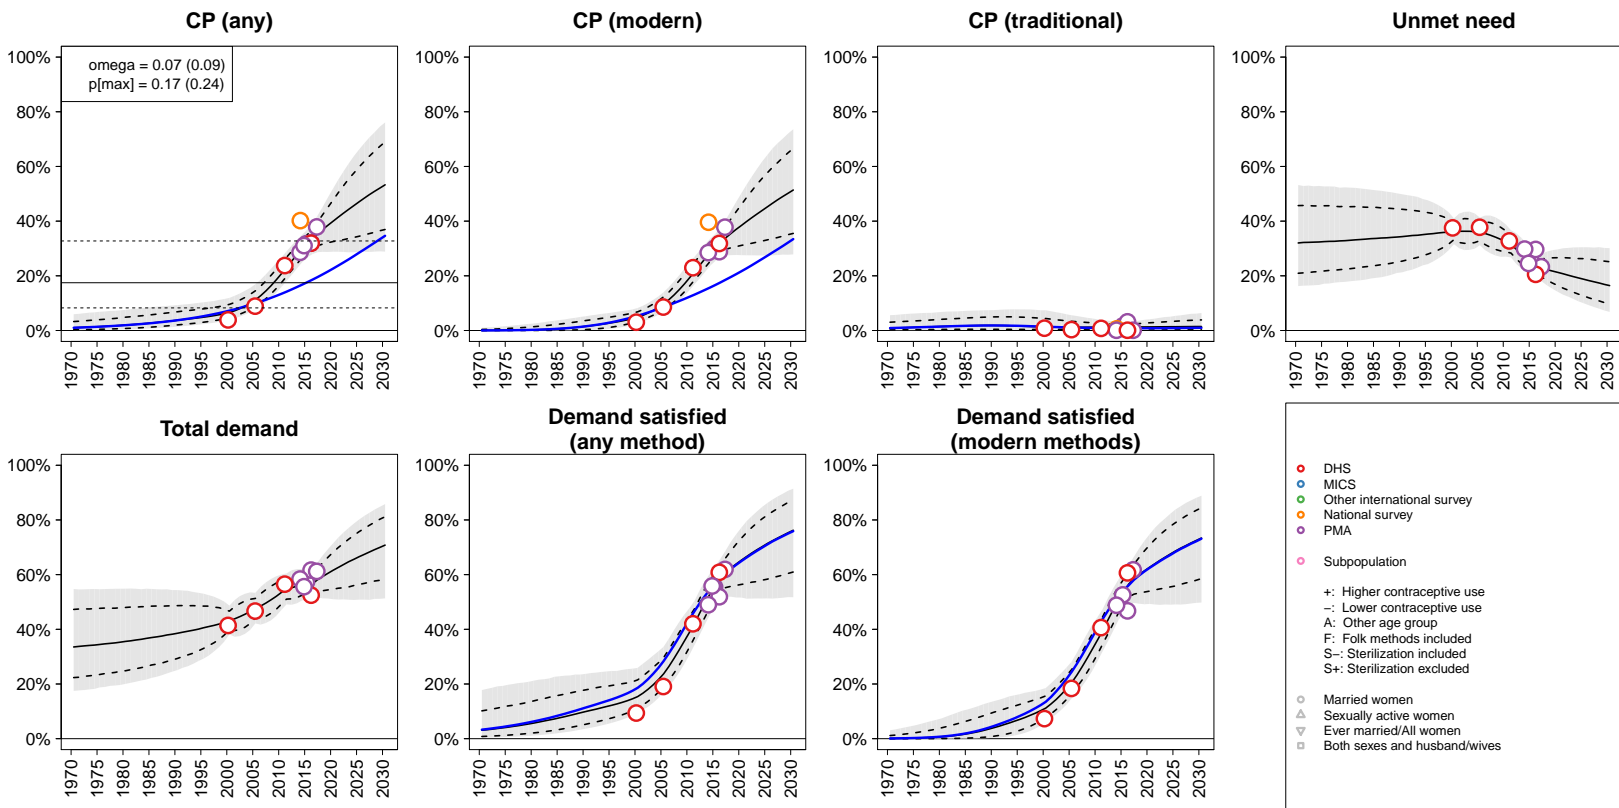



Gabon (Middle Africa) --- Married / In-Union

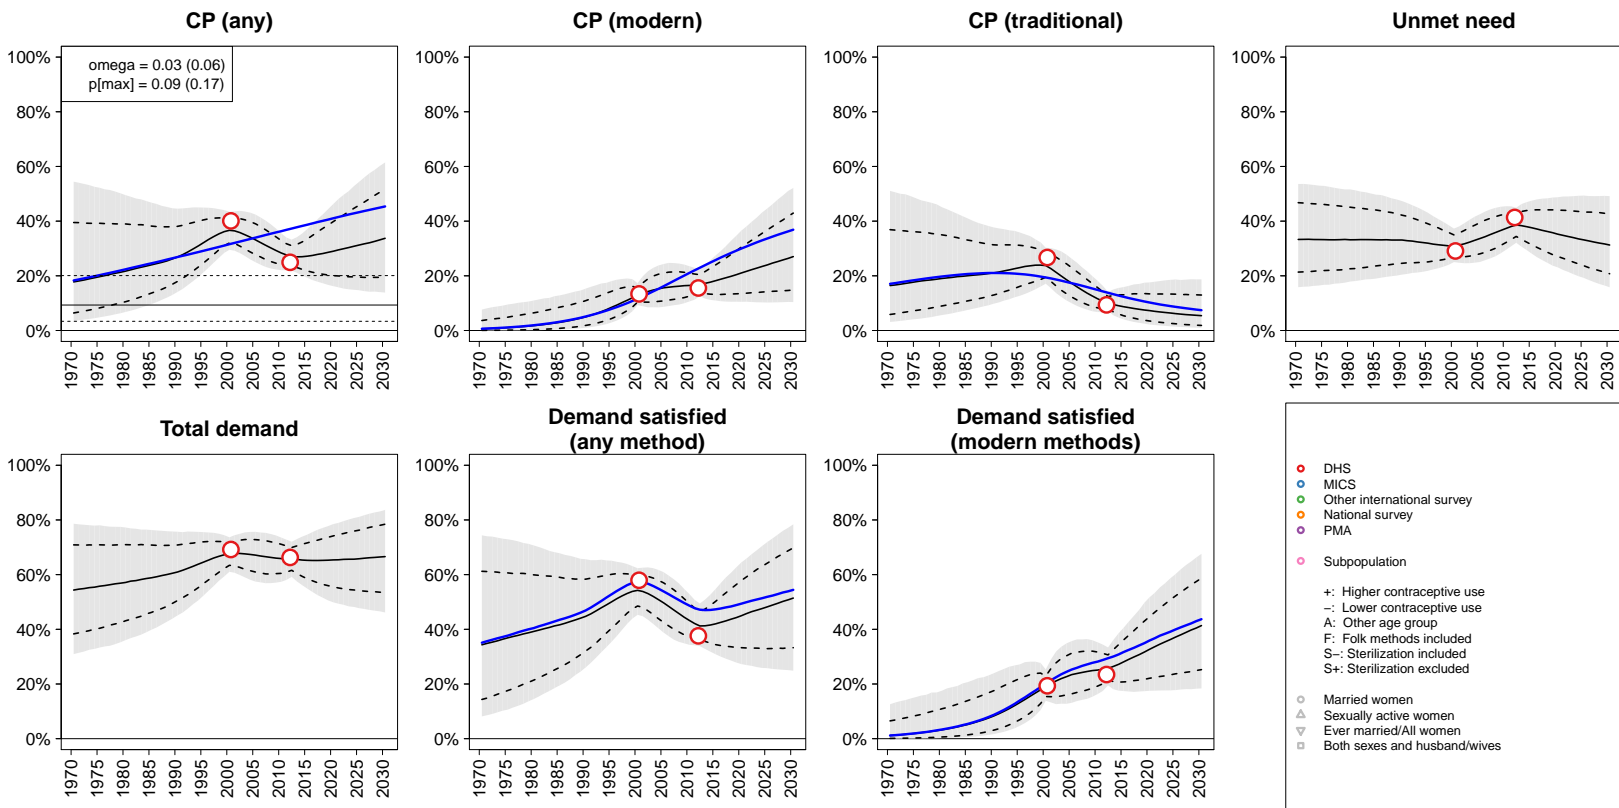

Gambia (Western Africa) --- Married / In-Union

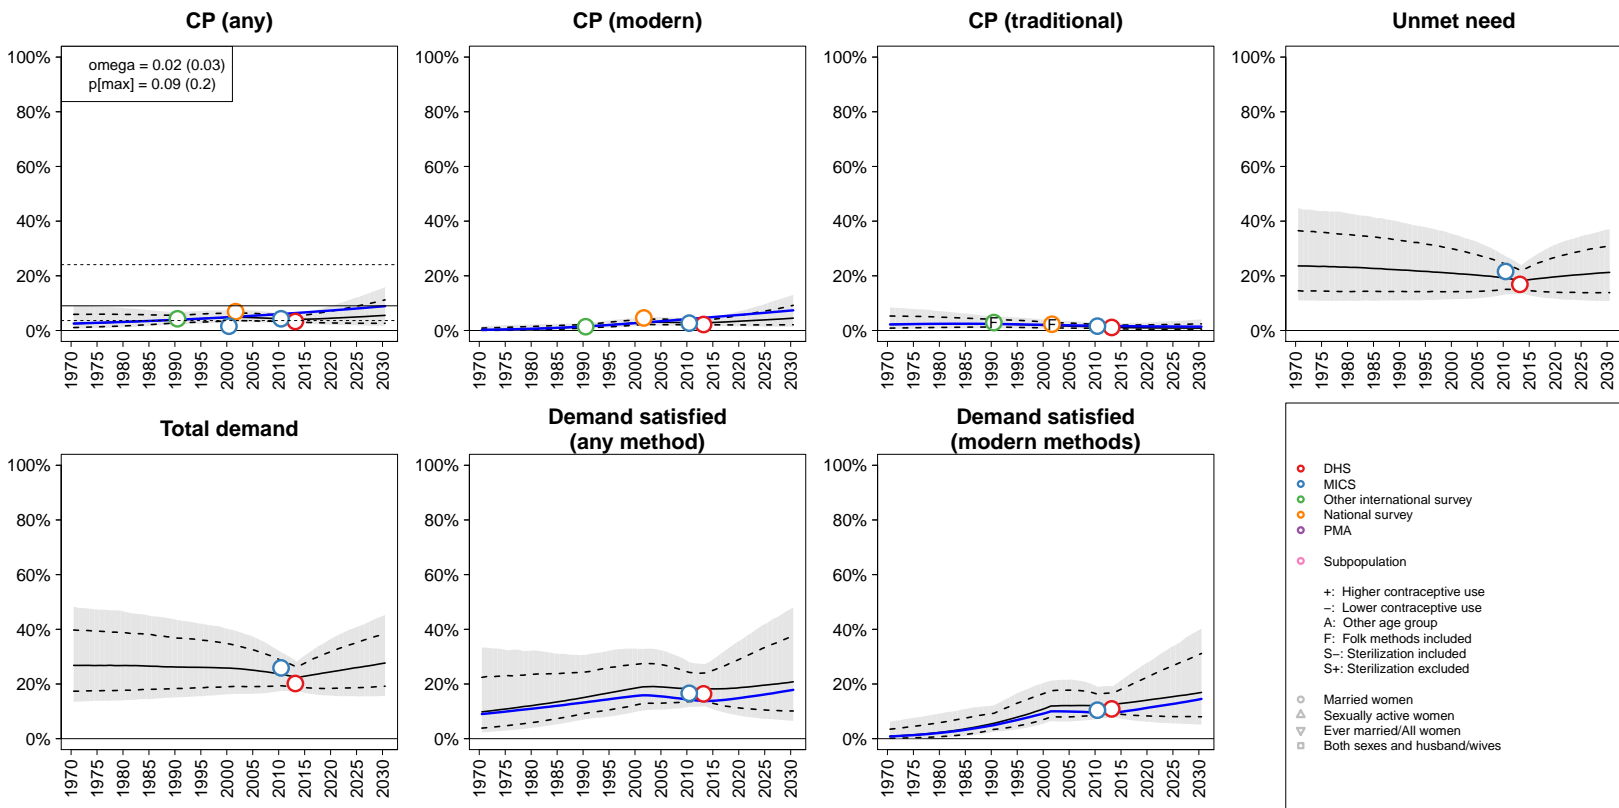

Georgia (Western Asia) --- Married / In-Union

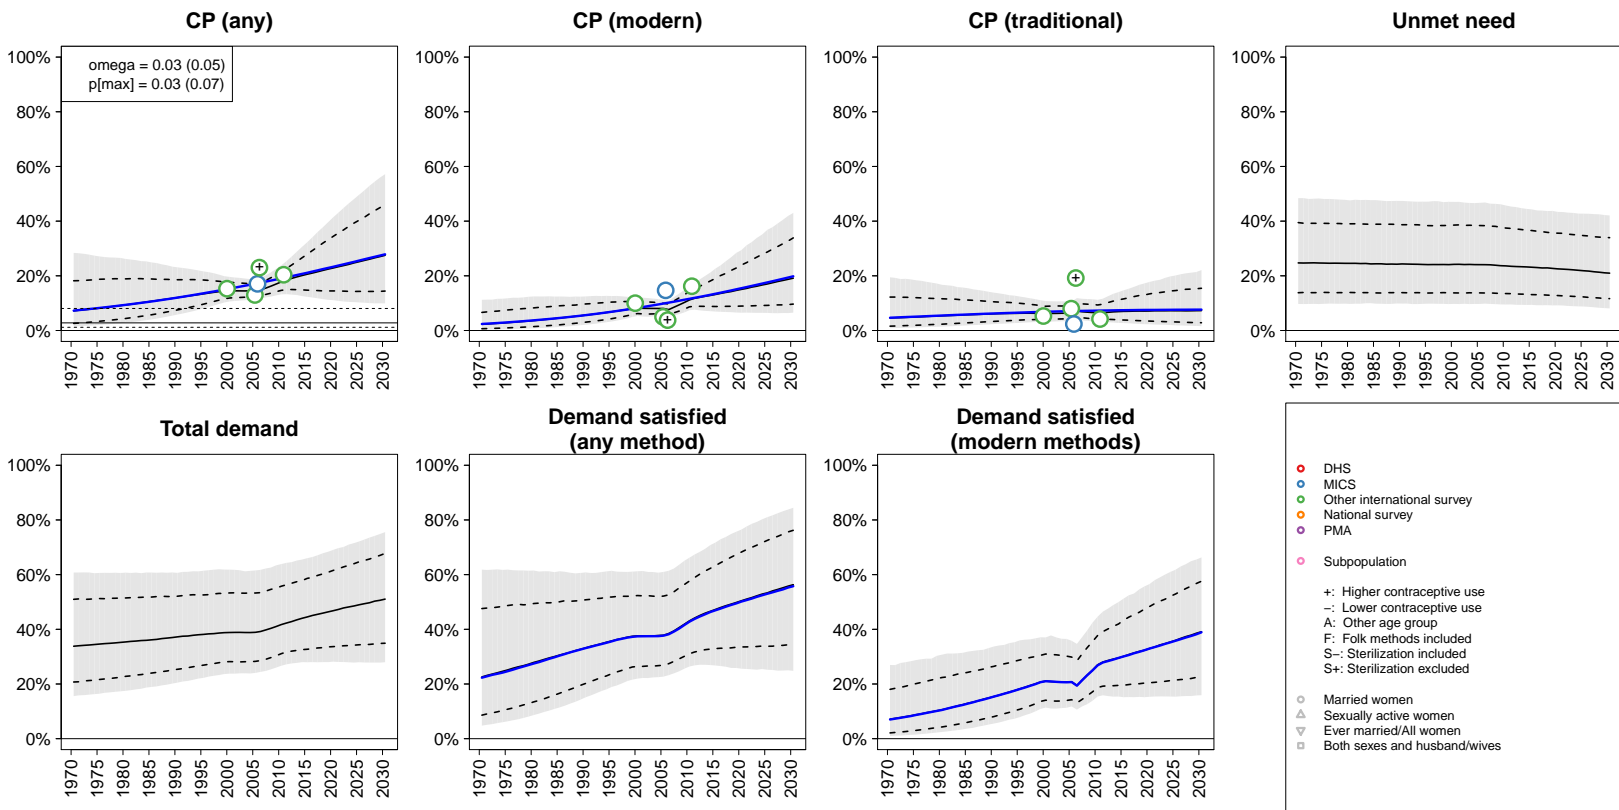

Ghana (Western Africa) --- Married / In-Union

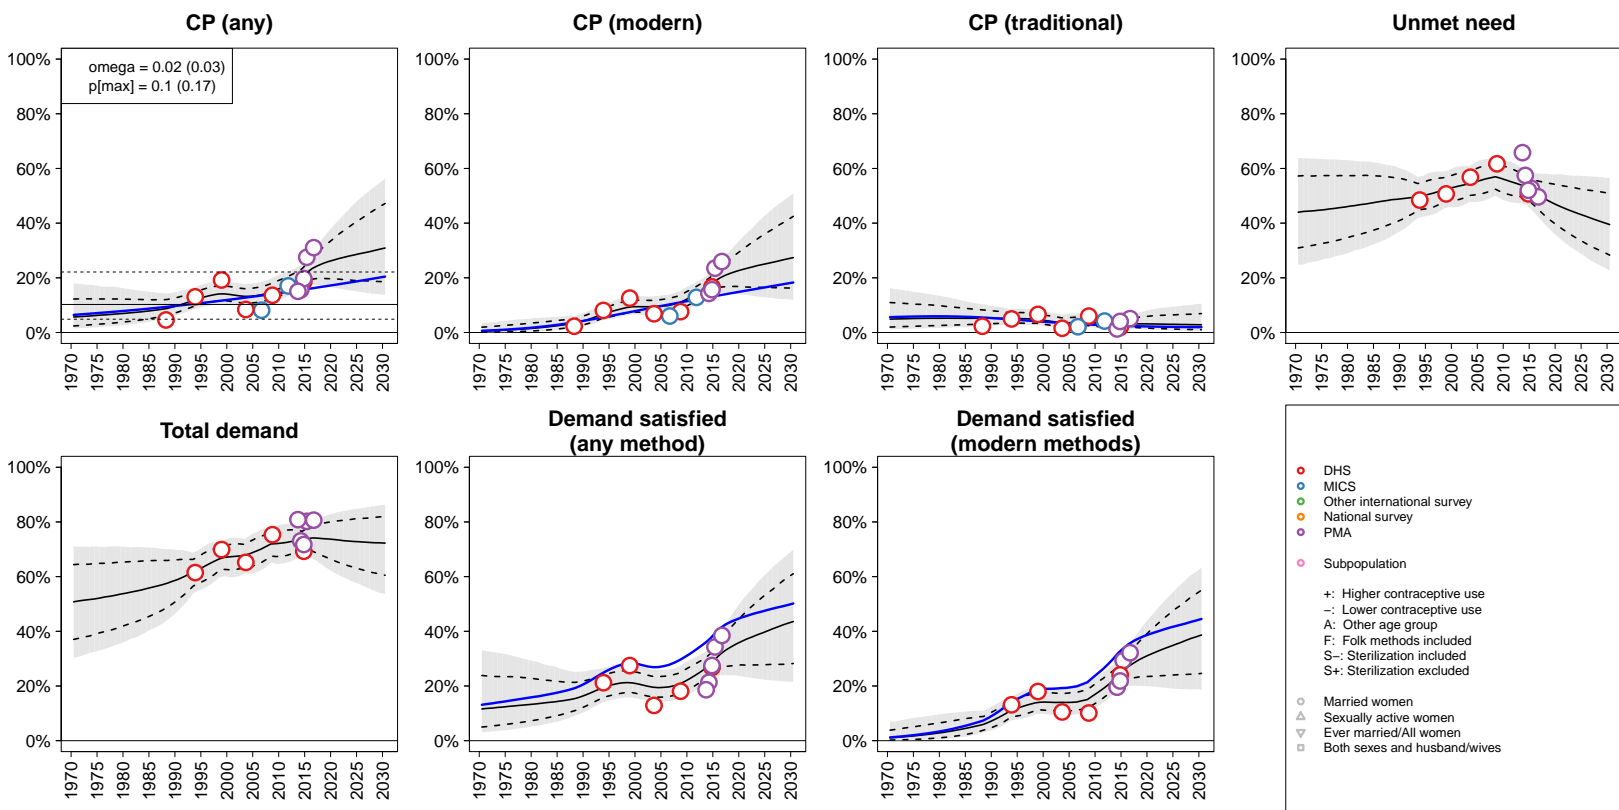

Grenada (Caribbean) --- Married / In-Union

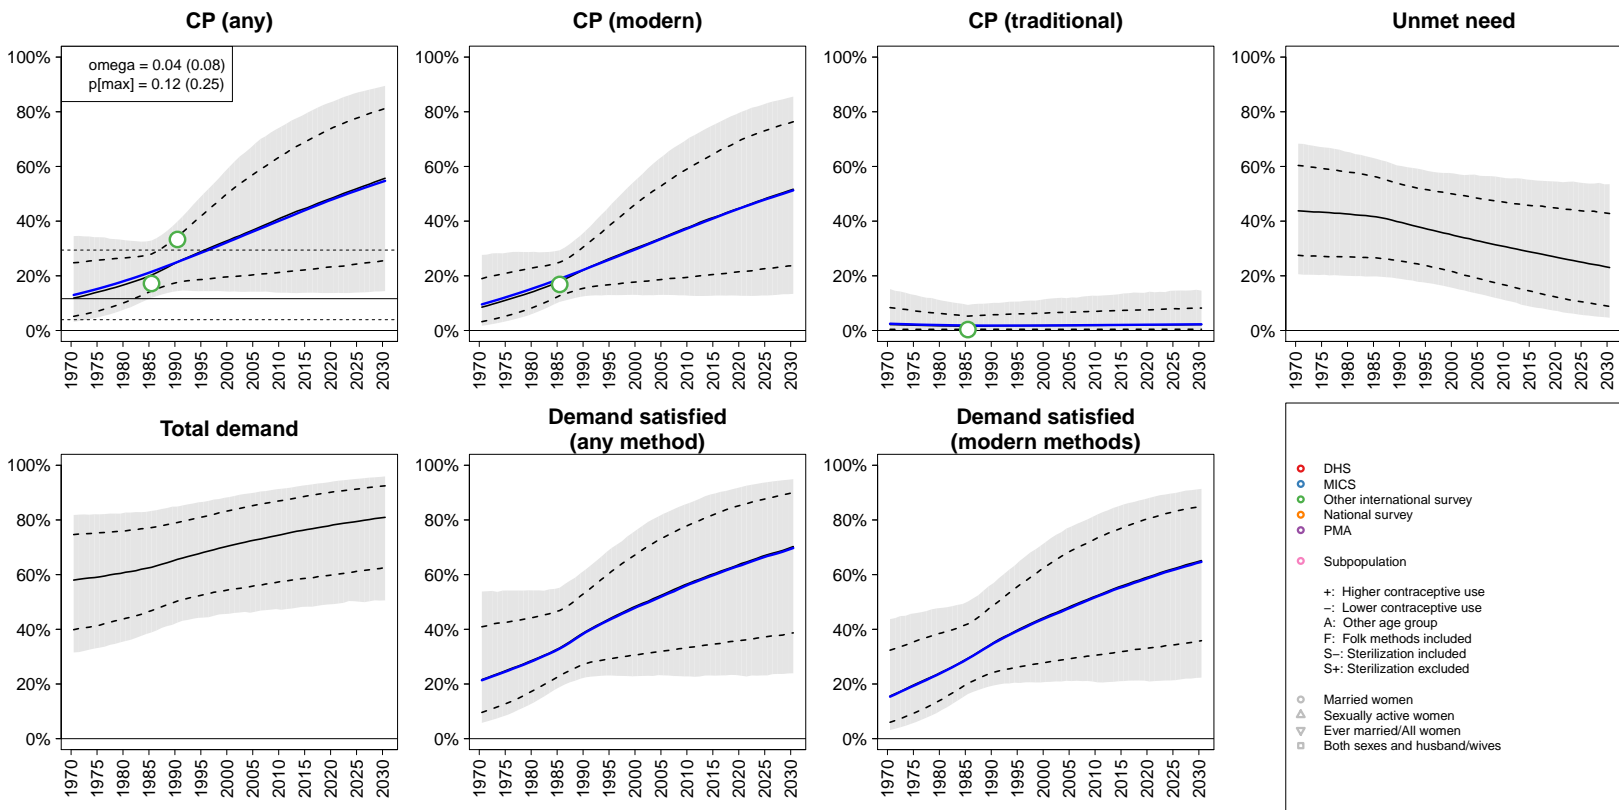

Guatemala (Central America) --- Married / In-Union

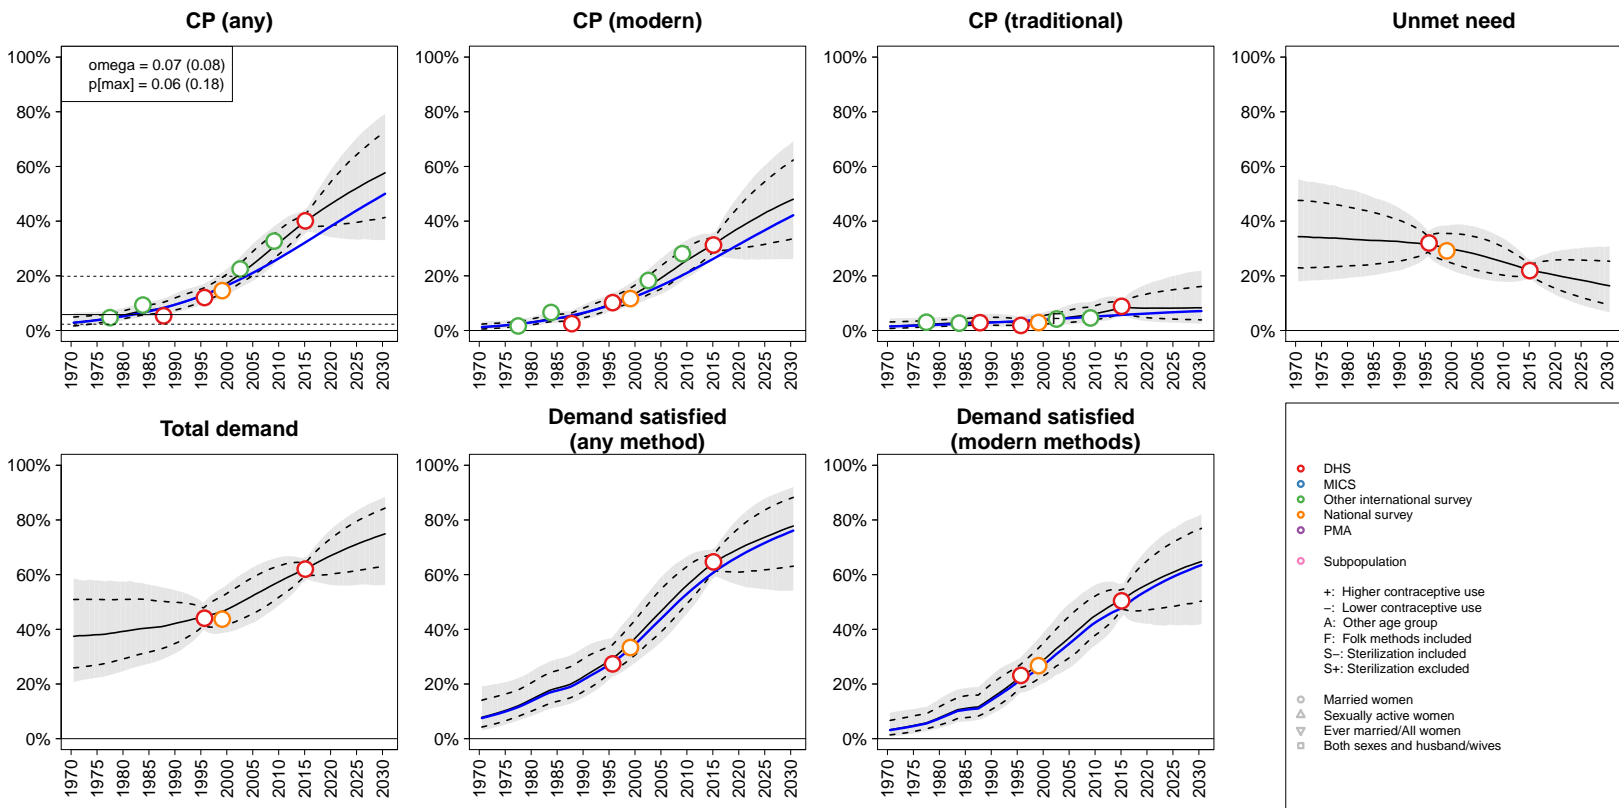

Guinea-Bissau (Western Africa) --- Married / In-Union

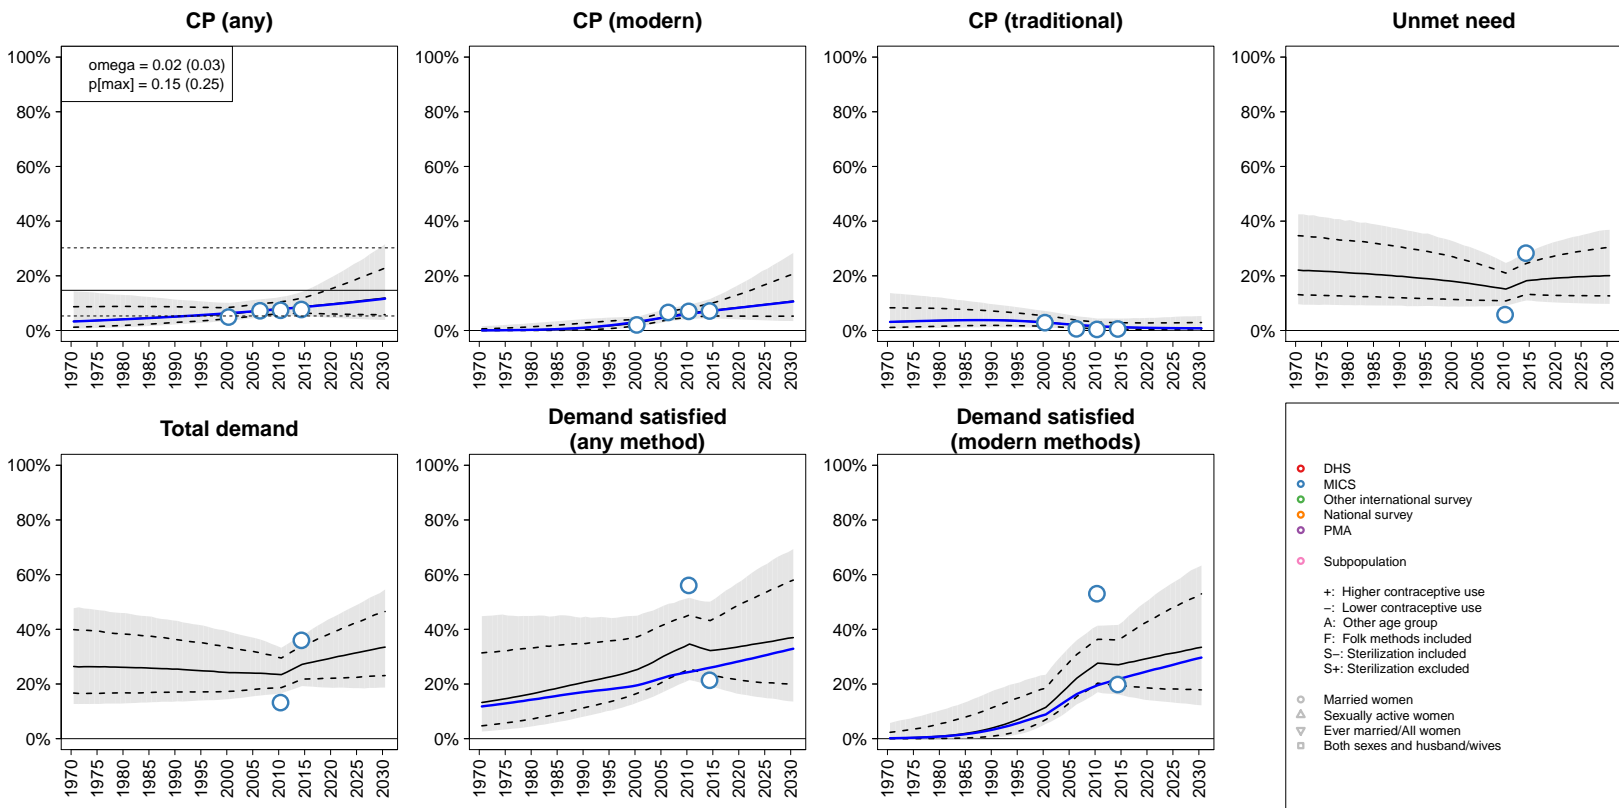

Guinea (Western Africa) --- Married / In-Union

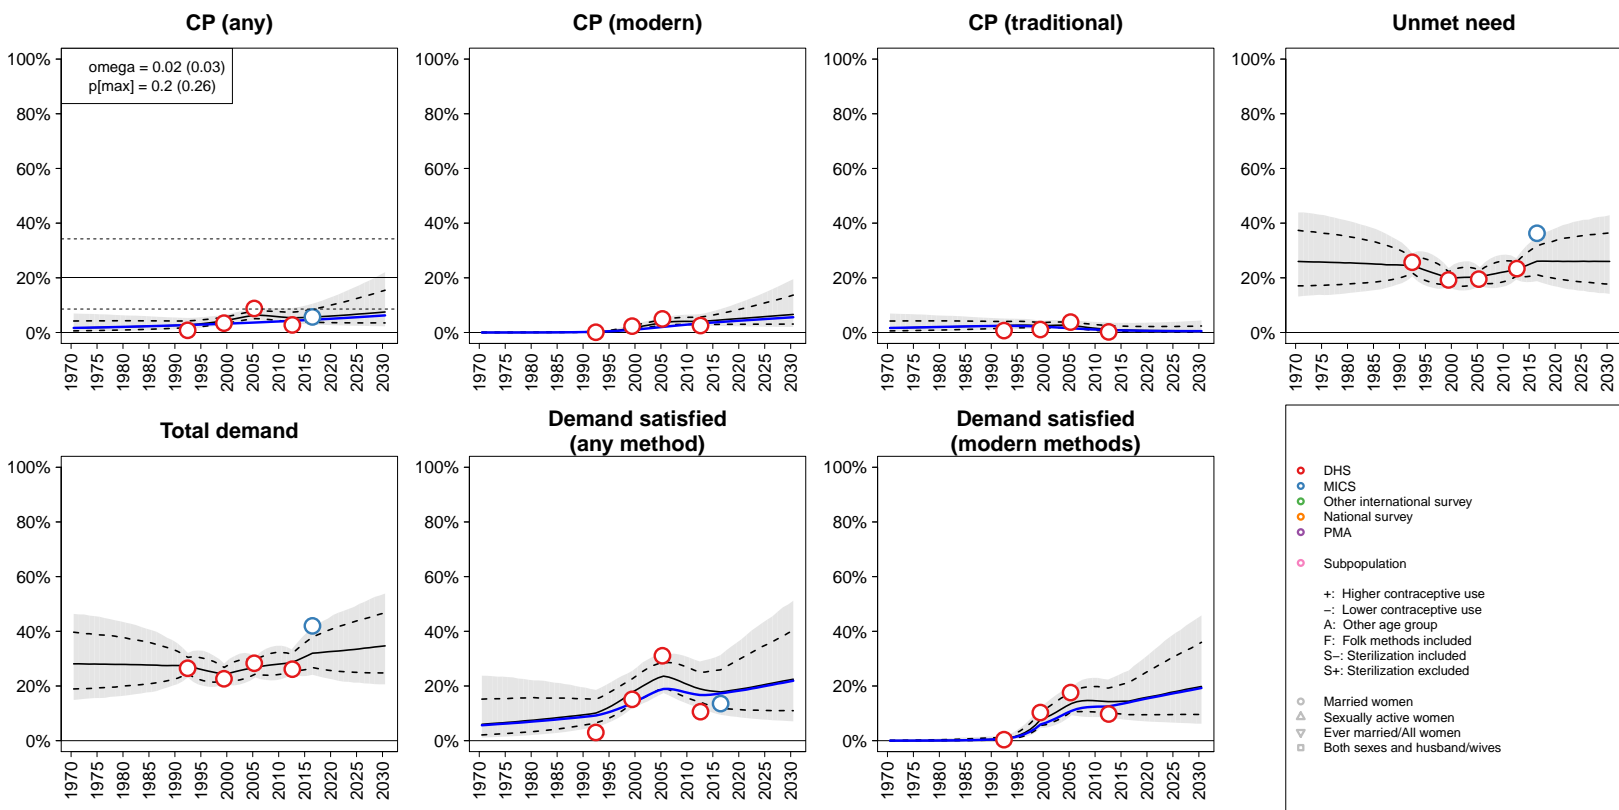



Guyana (South America) --- Married / In-Union

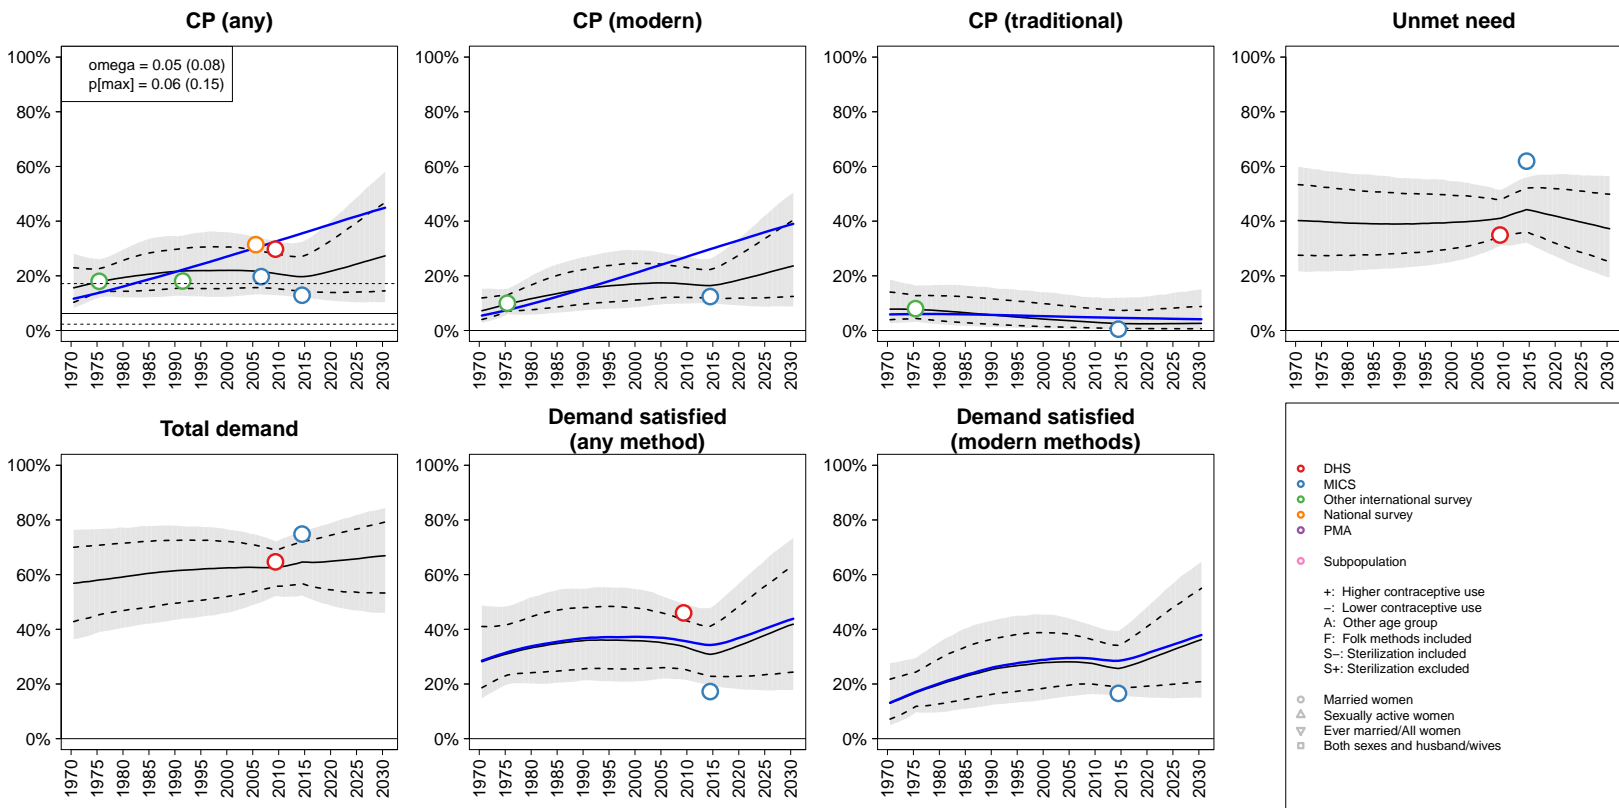

Haiti (Caribbean) --- Married / In-Union

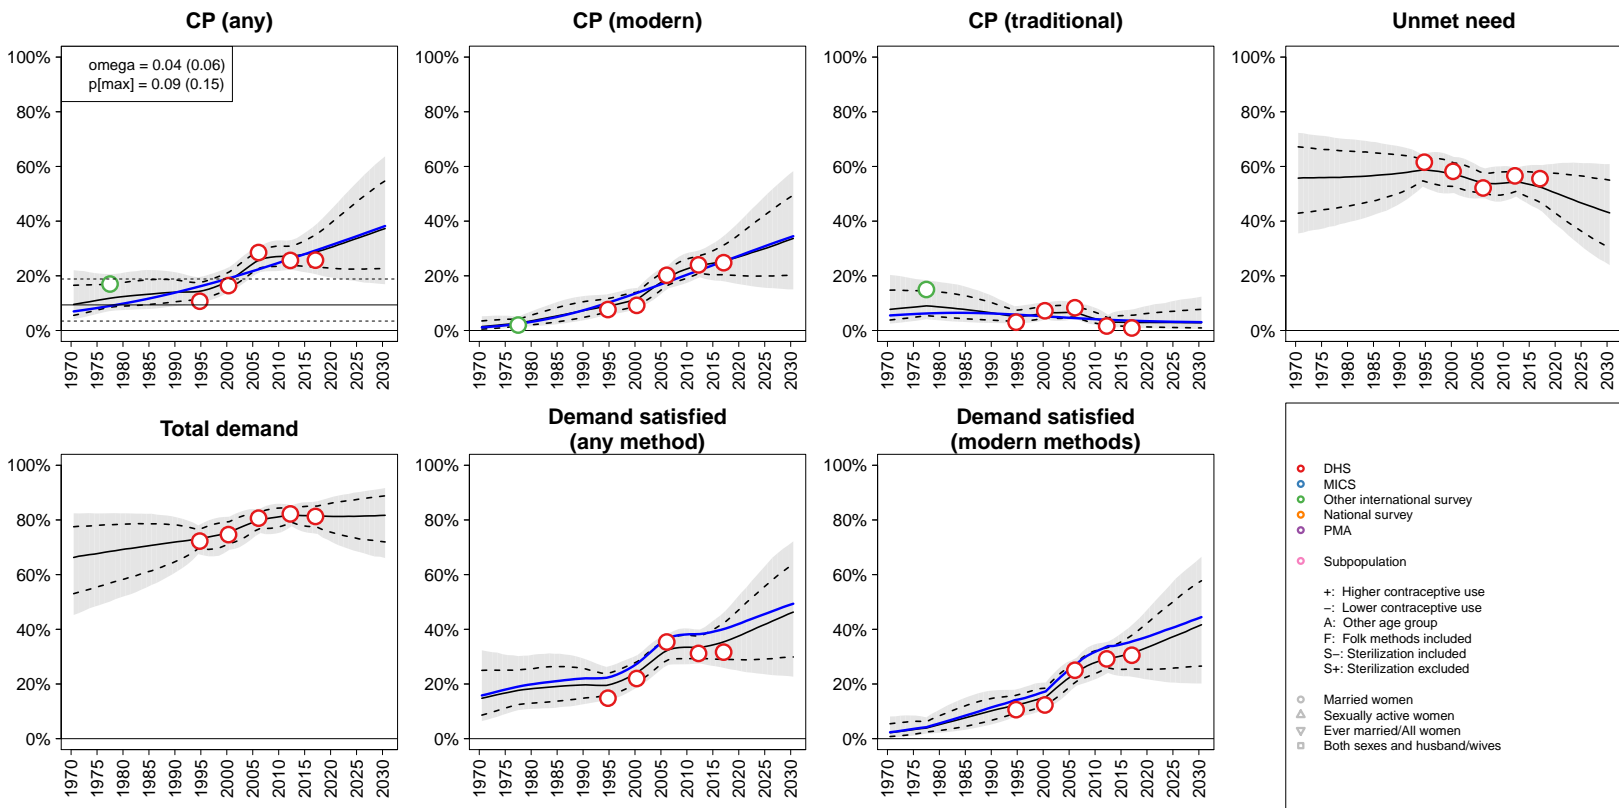

Honduras (Central America) --- Married / In-Union

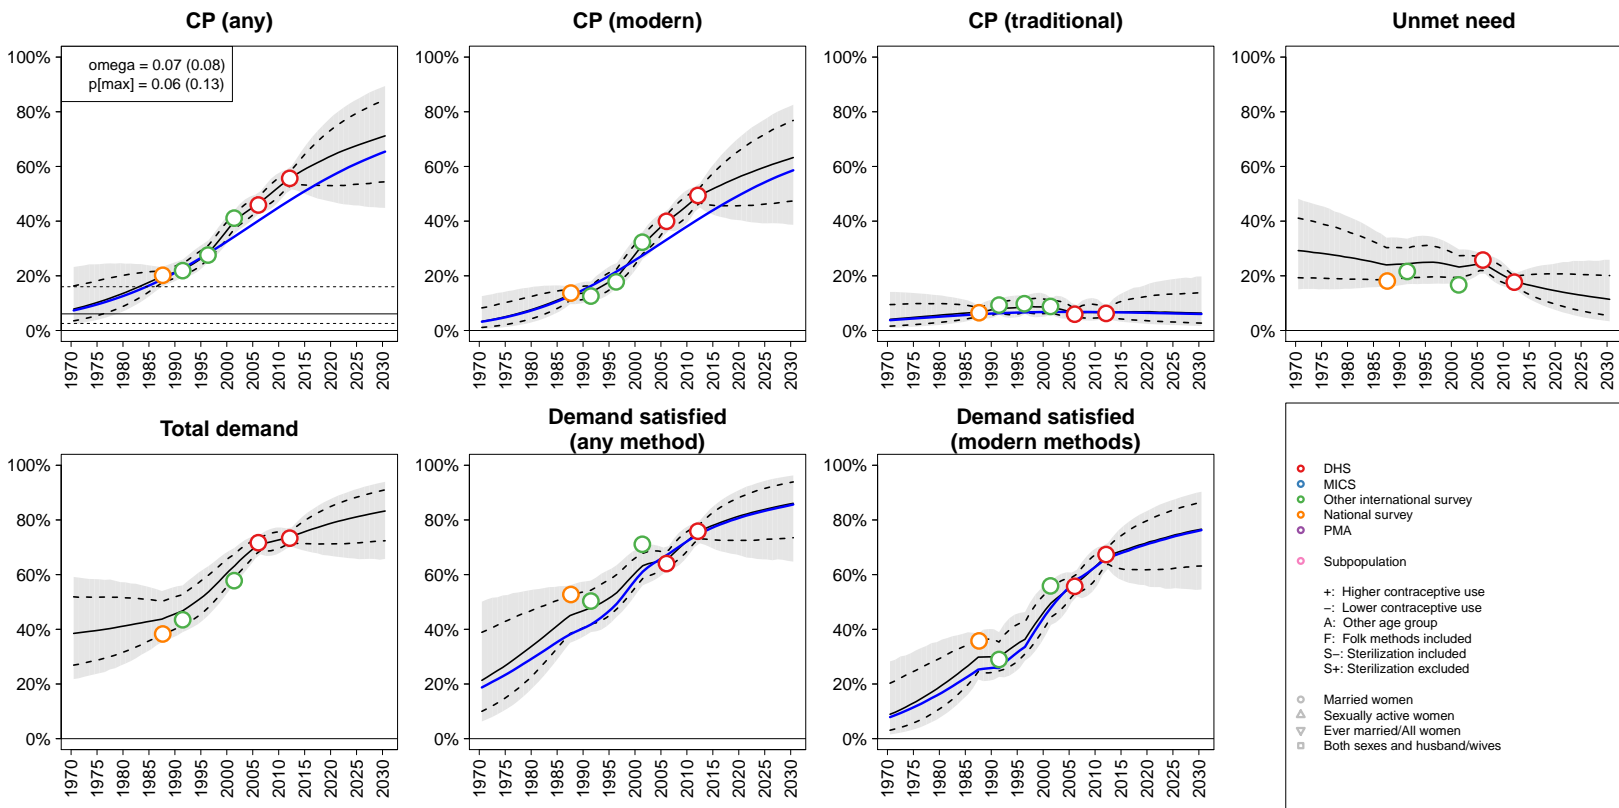

India (Southern Asia) --- Married / In-Union

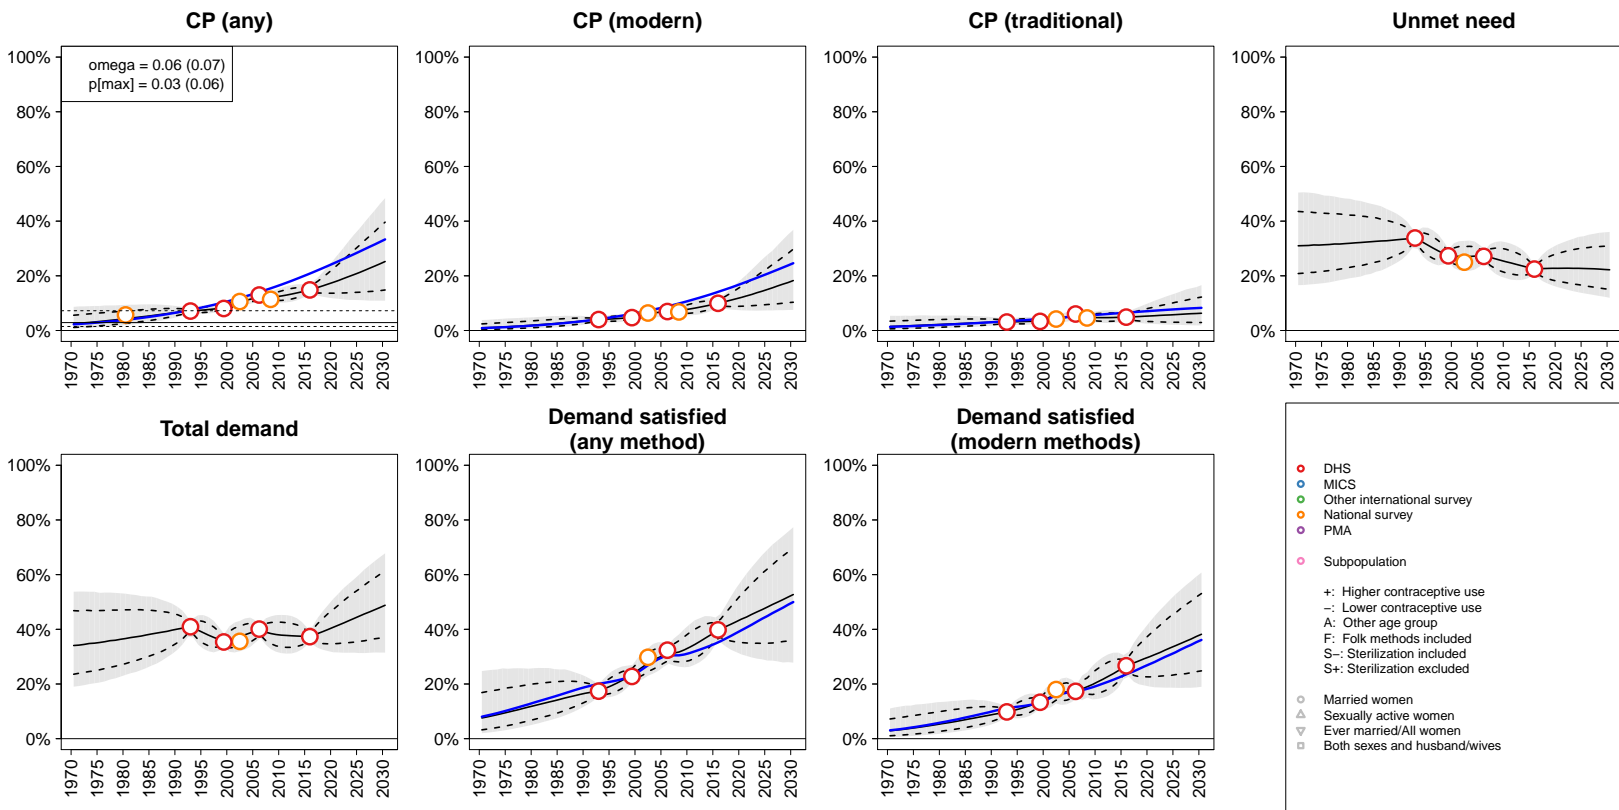

Indonesia (South-eastern Asia) --- Married / In-Union

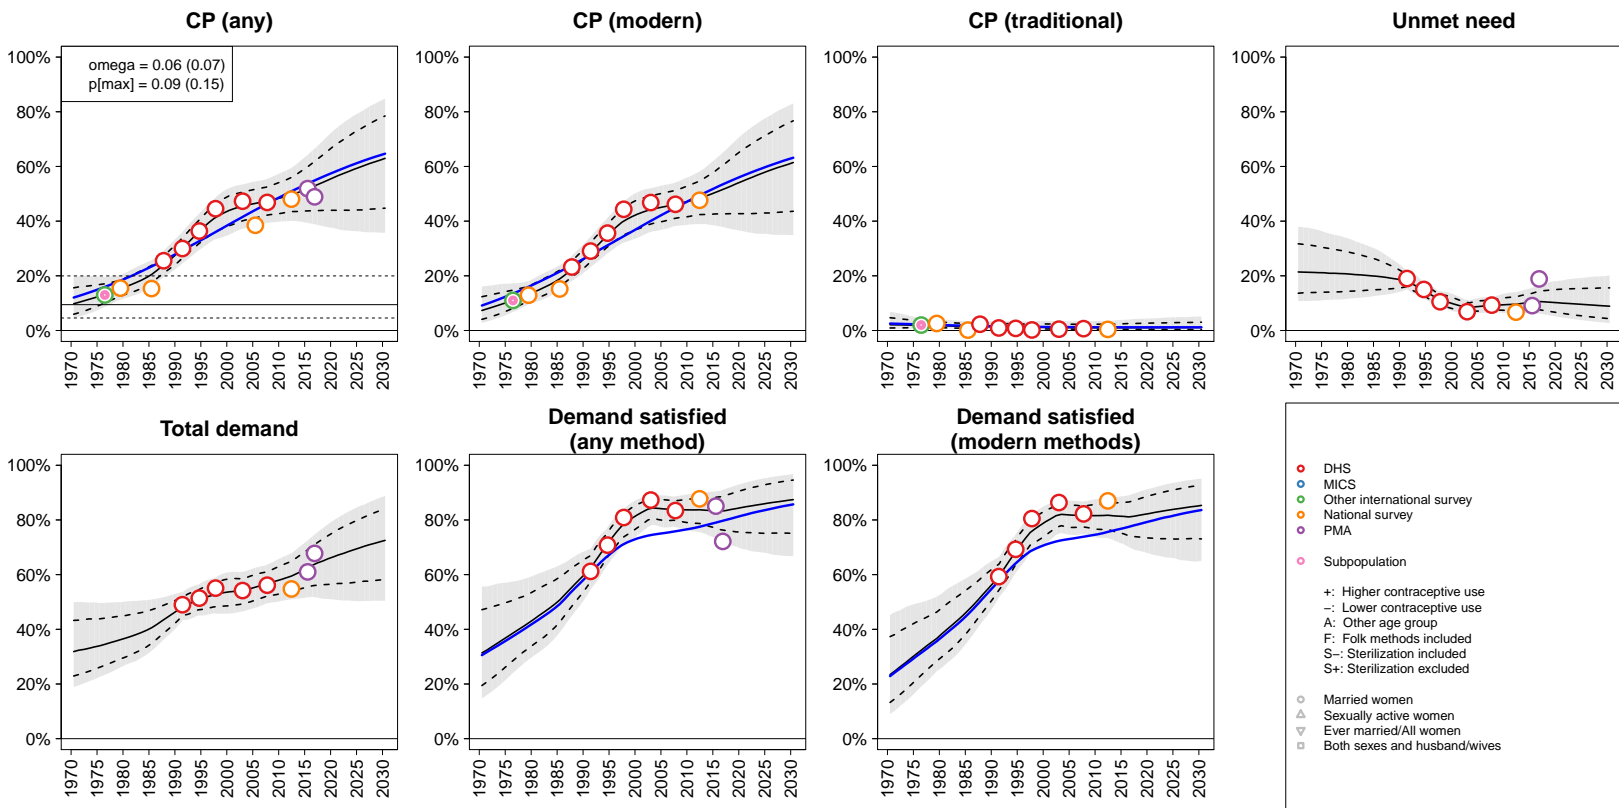

Iran, Islamic Republic of (Southern Asia) — Married / In-Union

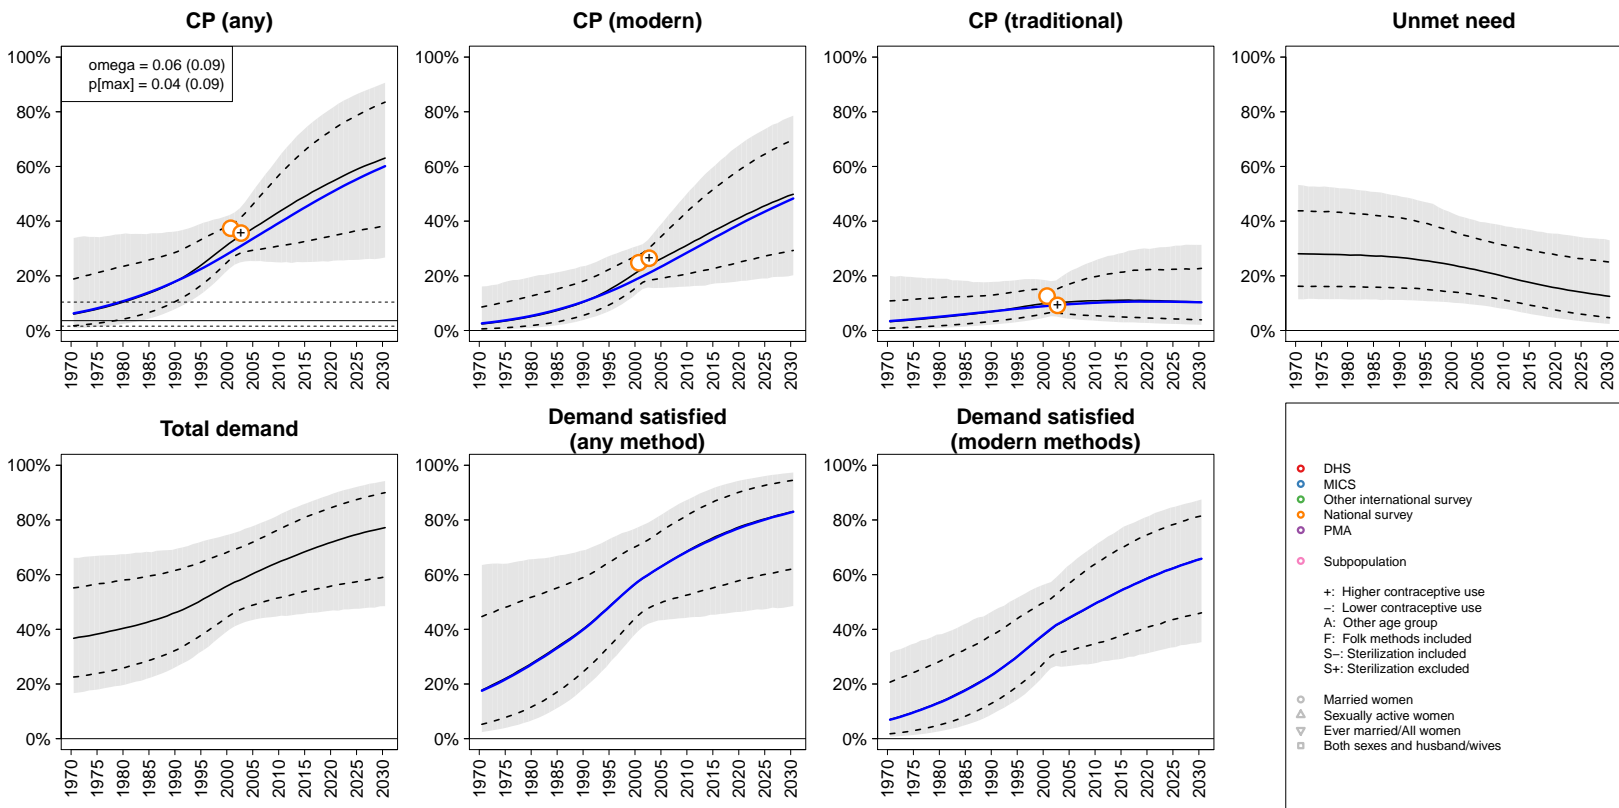

Iraq (Western Asia) --- Married / In-Union

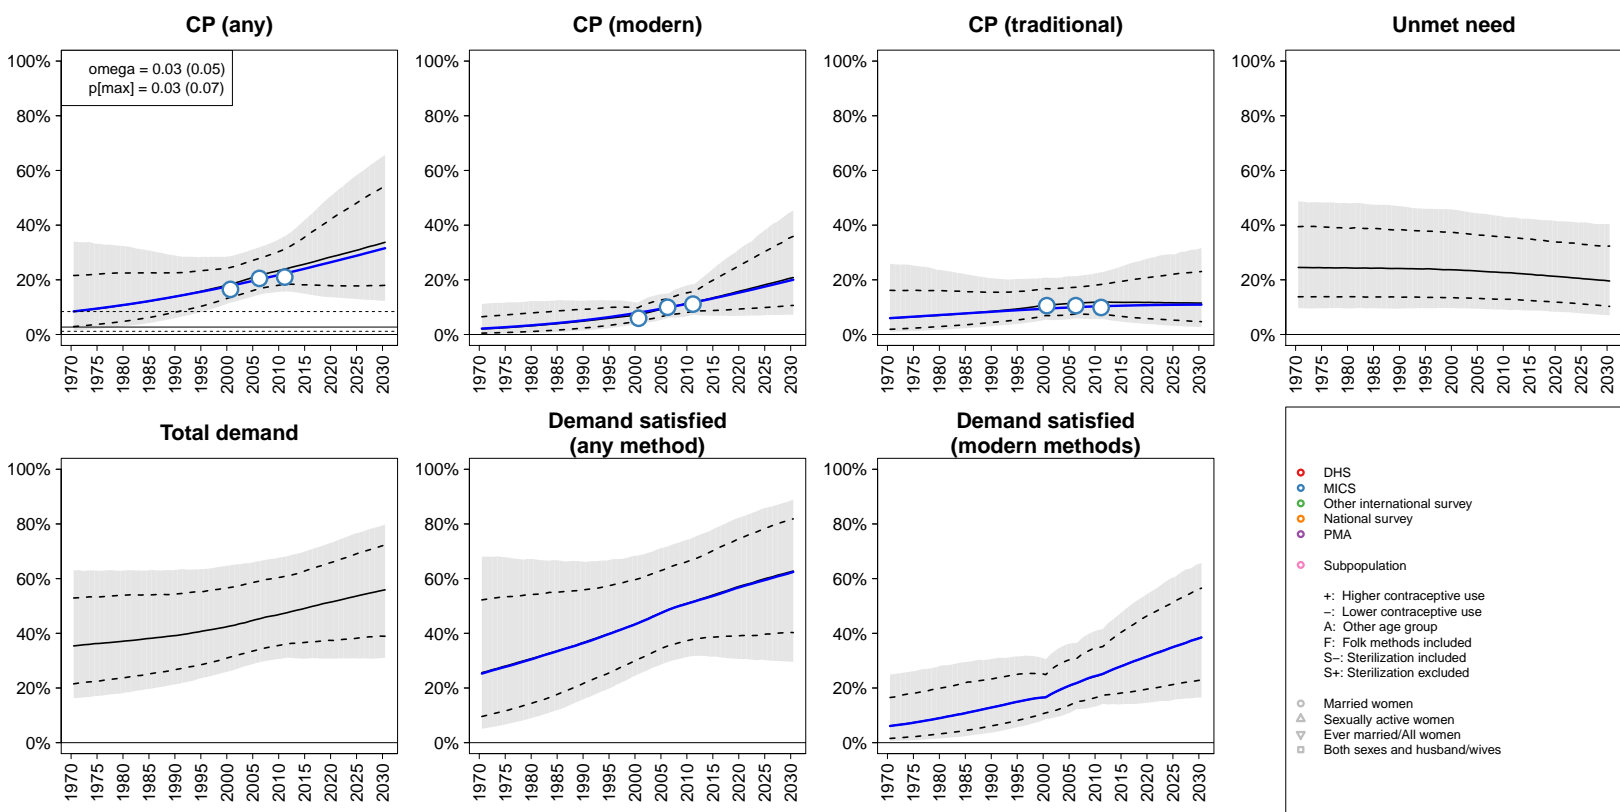

Jamaica (Caribbean) --- Married / In-Union

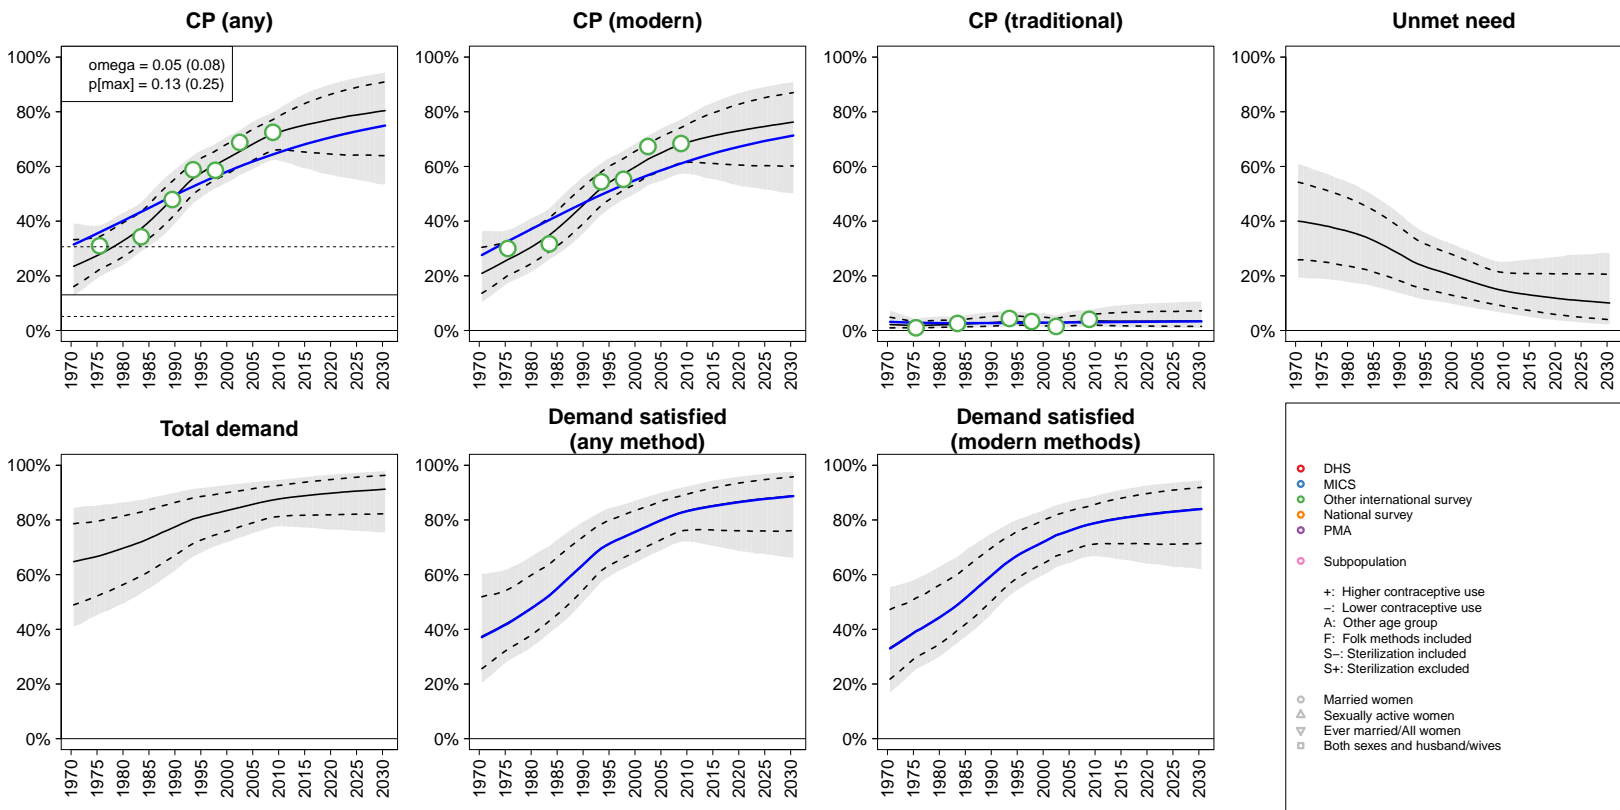



Jordan (Western Asia) --- Married / In-Union

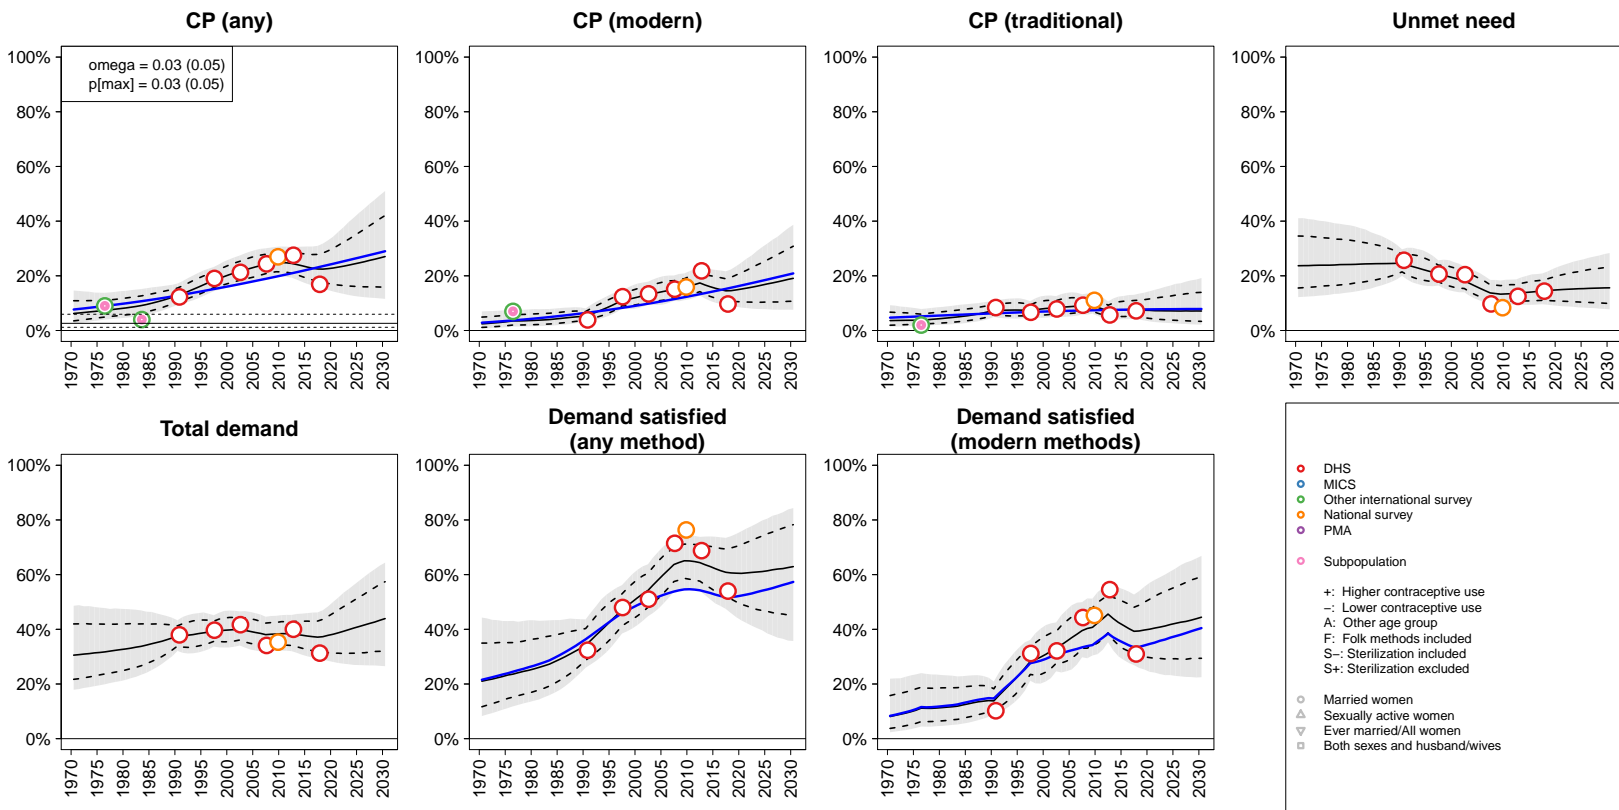

Kazakhstan (Central Asia) --- Married / In-Union

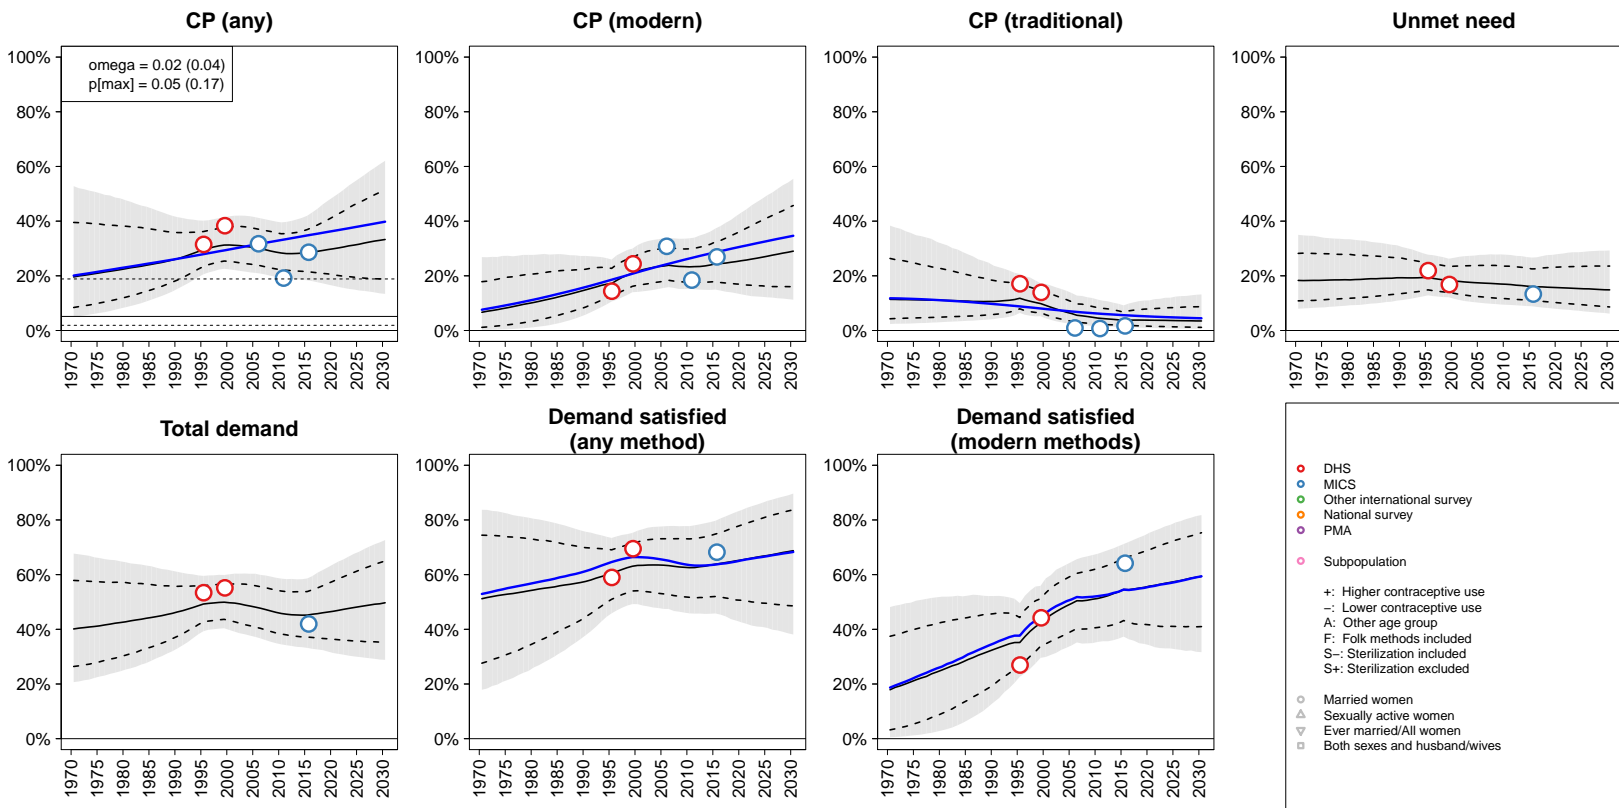

Kenya (Eastern Africa) --- Married / In-Union

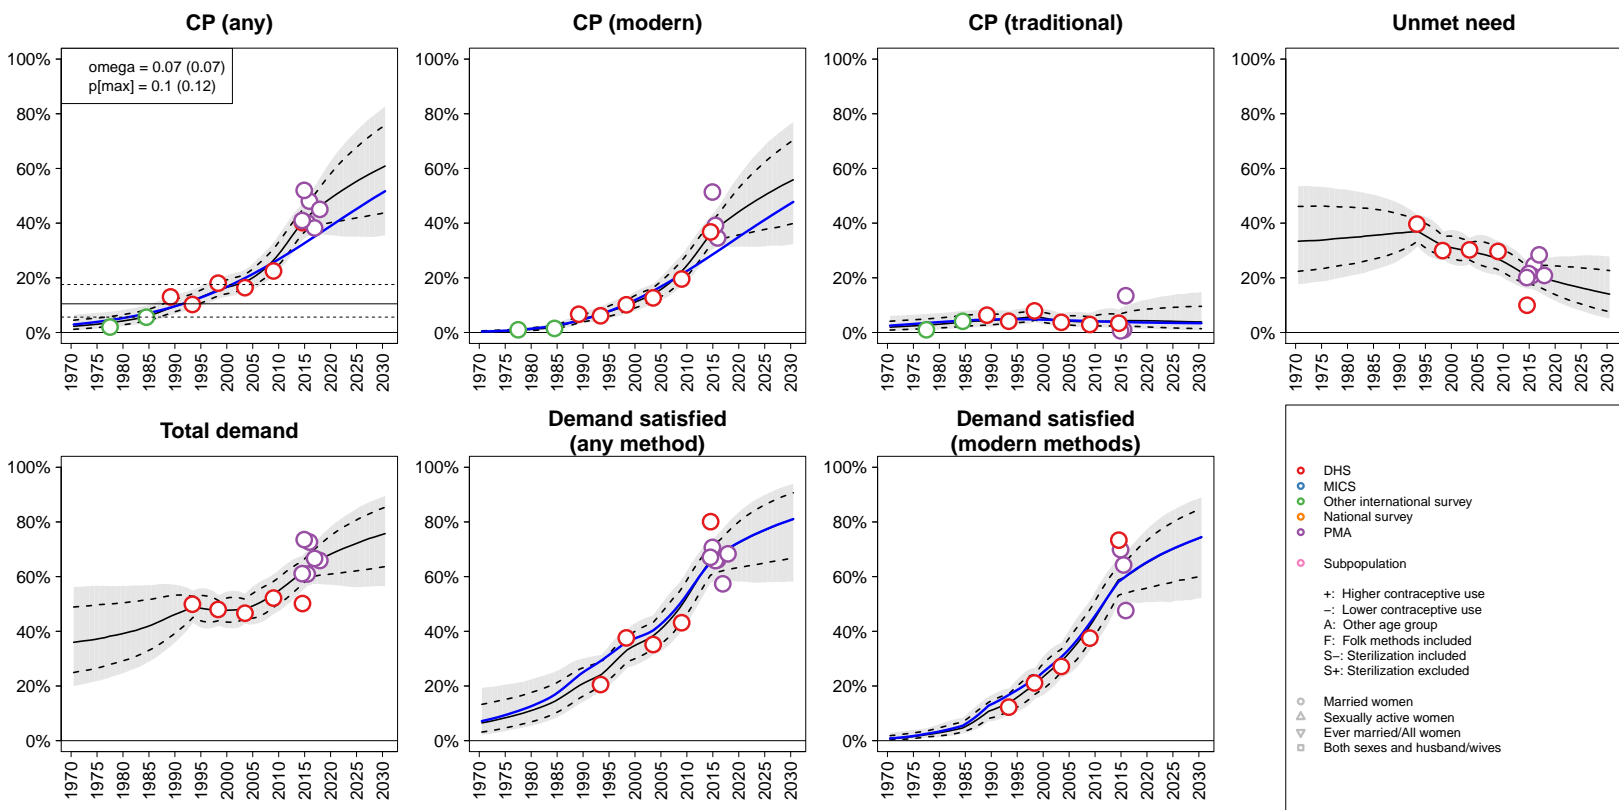

Kuwait (Western Asia) --- Married / In-Union

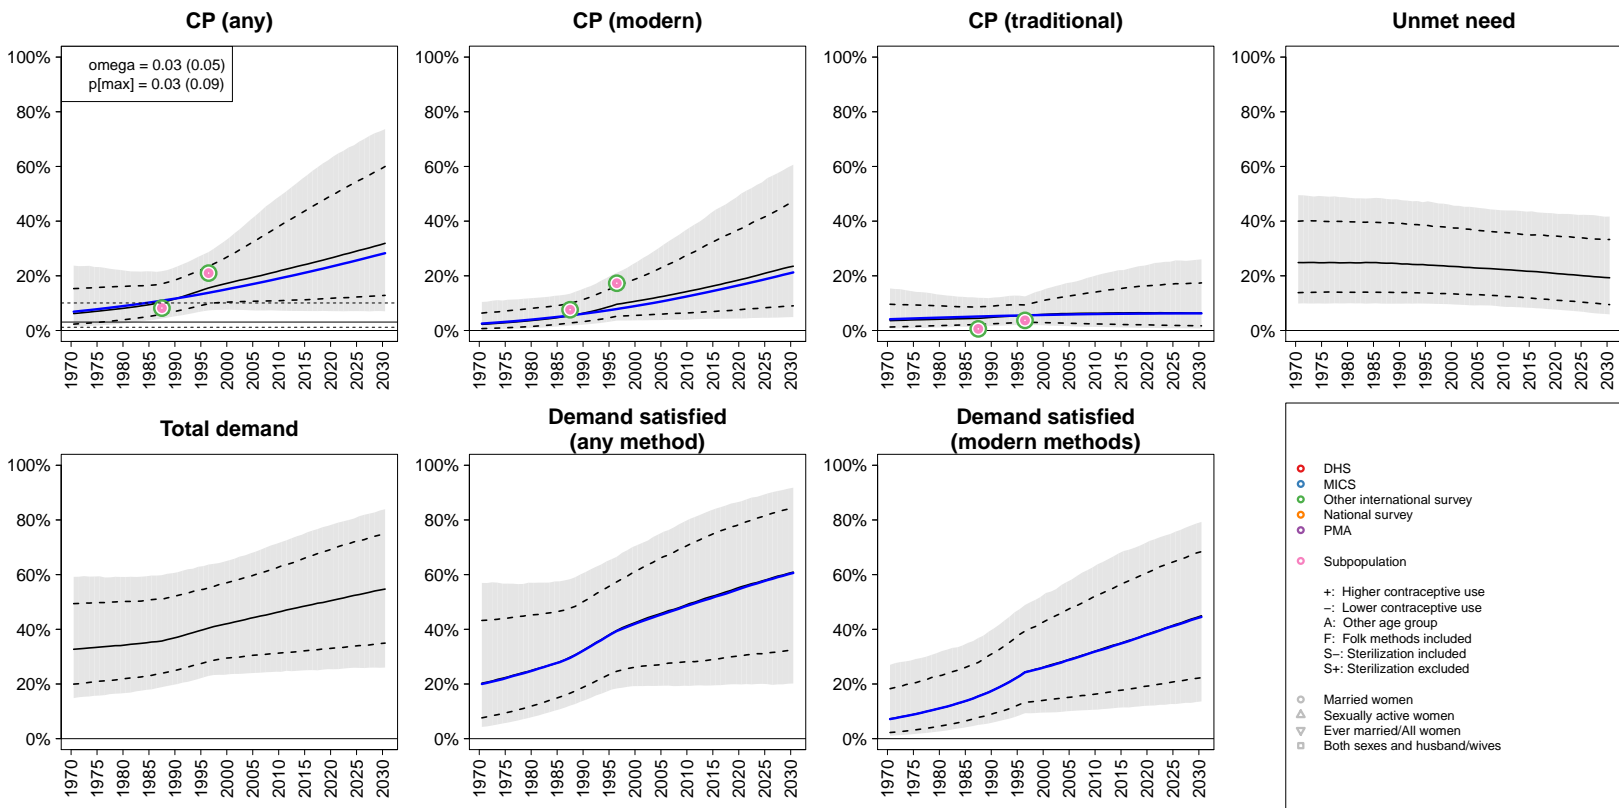

Kyrgyzstan (Central Asia) --- Married / In-Union

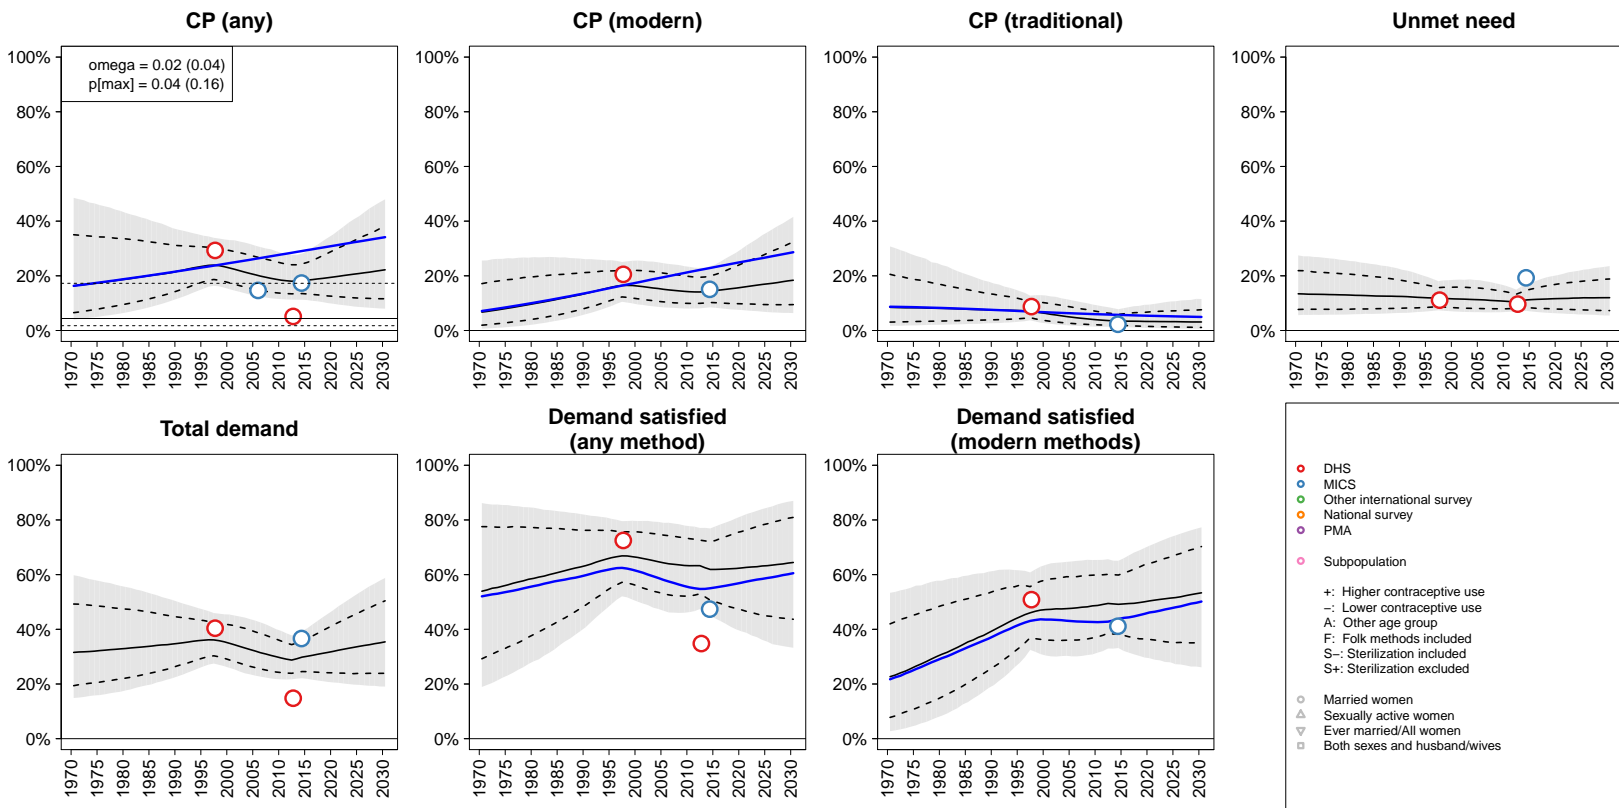

Lao People's Dem. Republic (South-eastern Asia) --- Married / In-Union

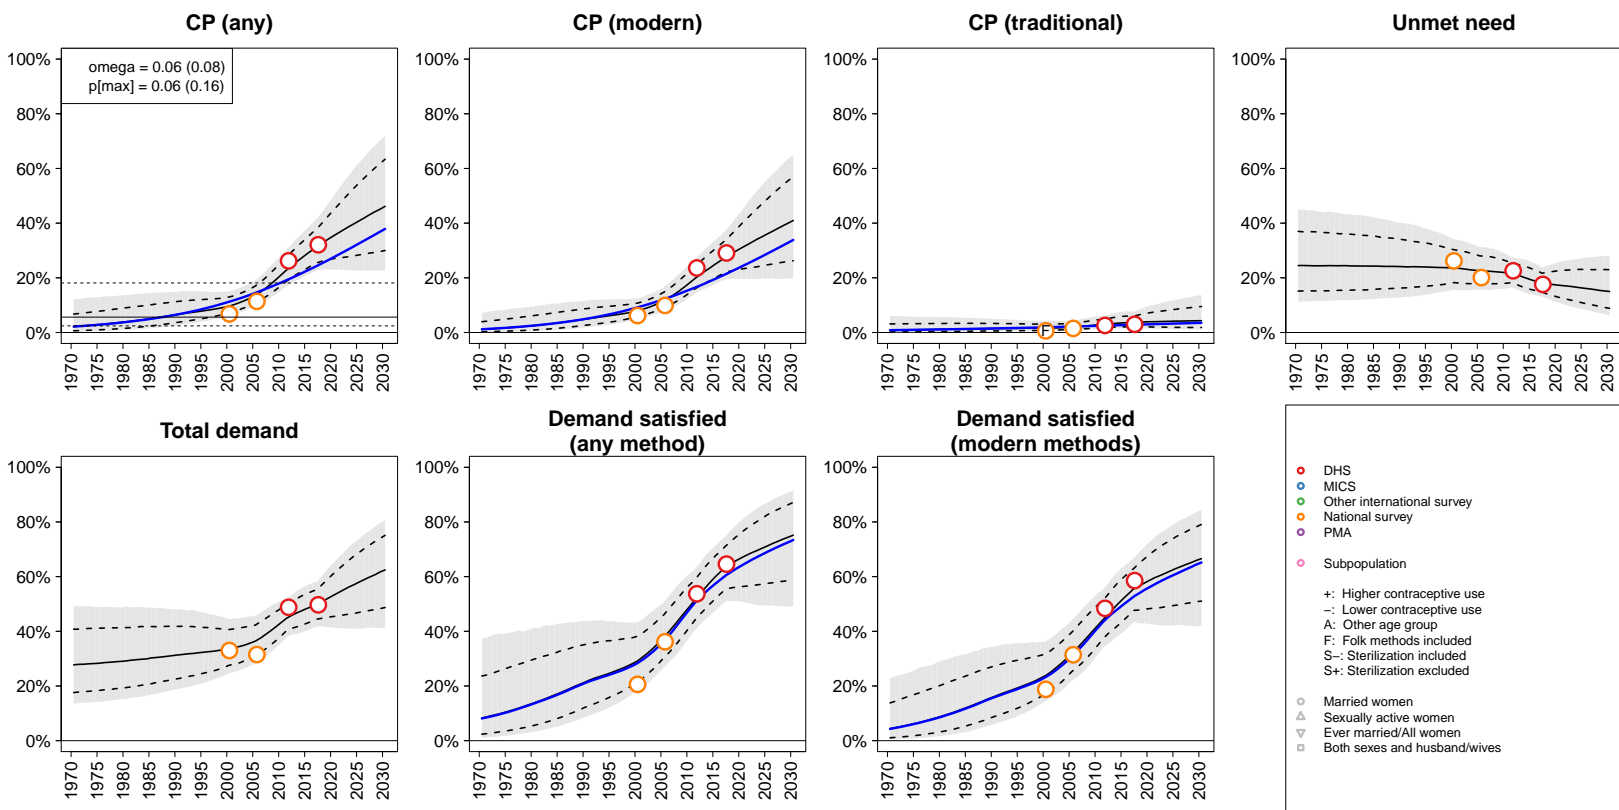

Lebanon (Western Asia) --- Married / In-Union

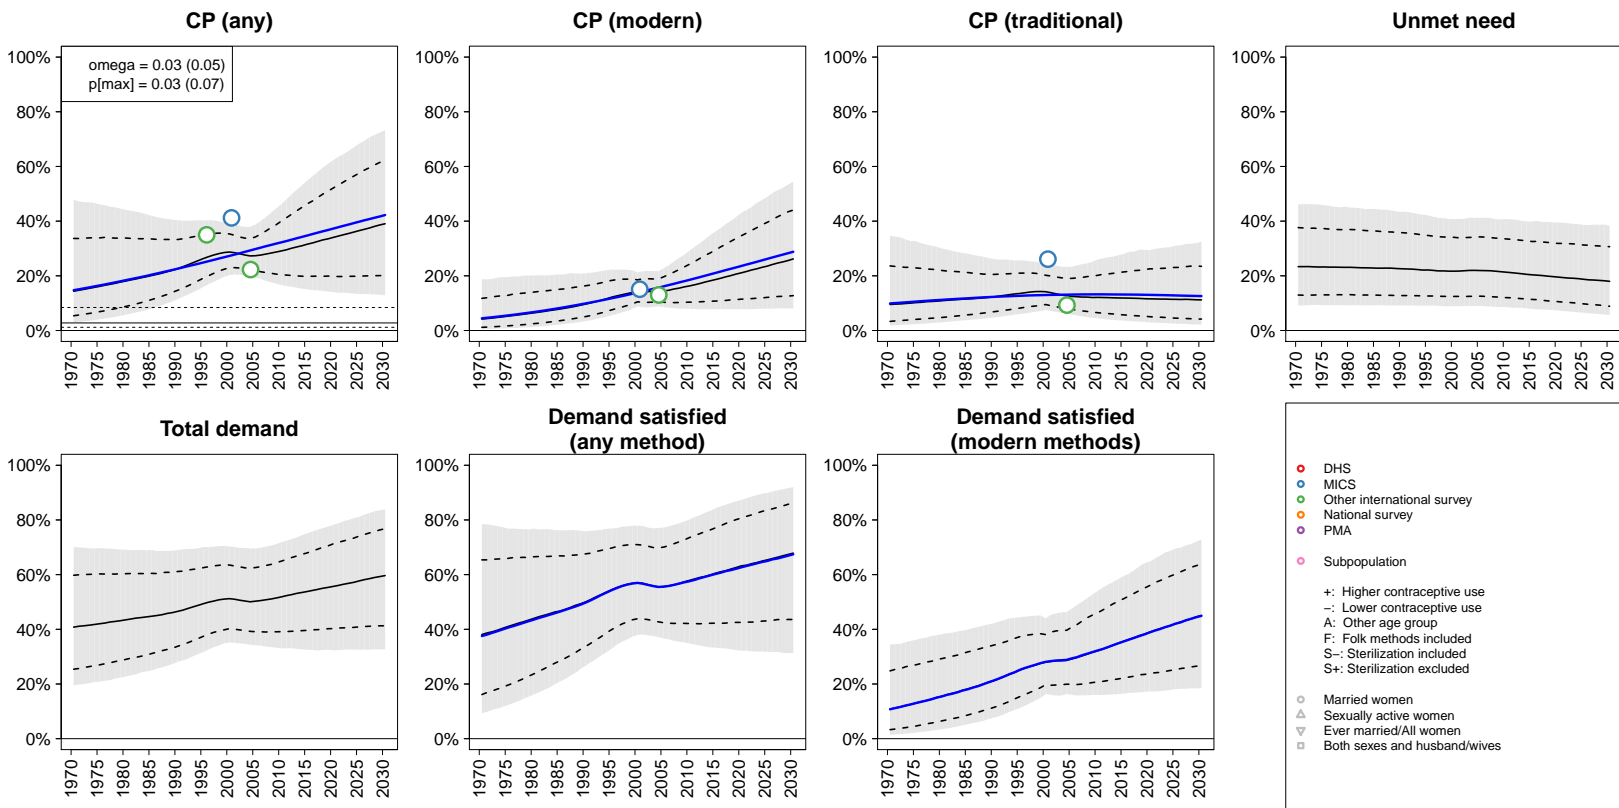

Lesotho (Southern Africa) --- Married / In-Union

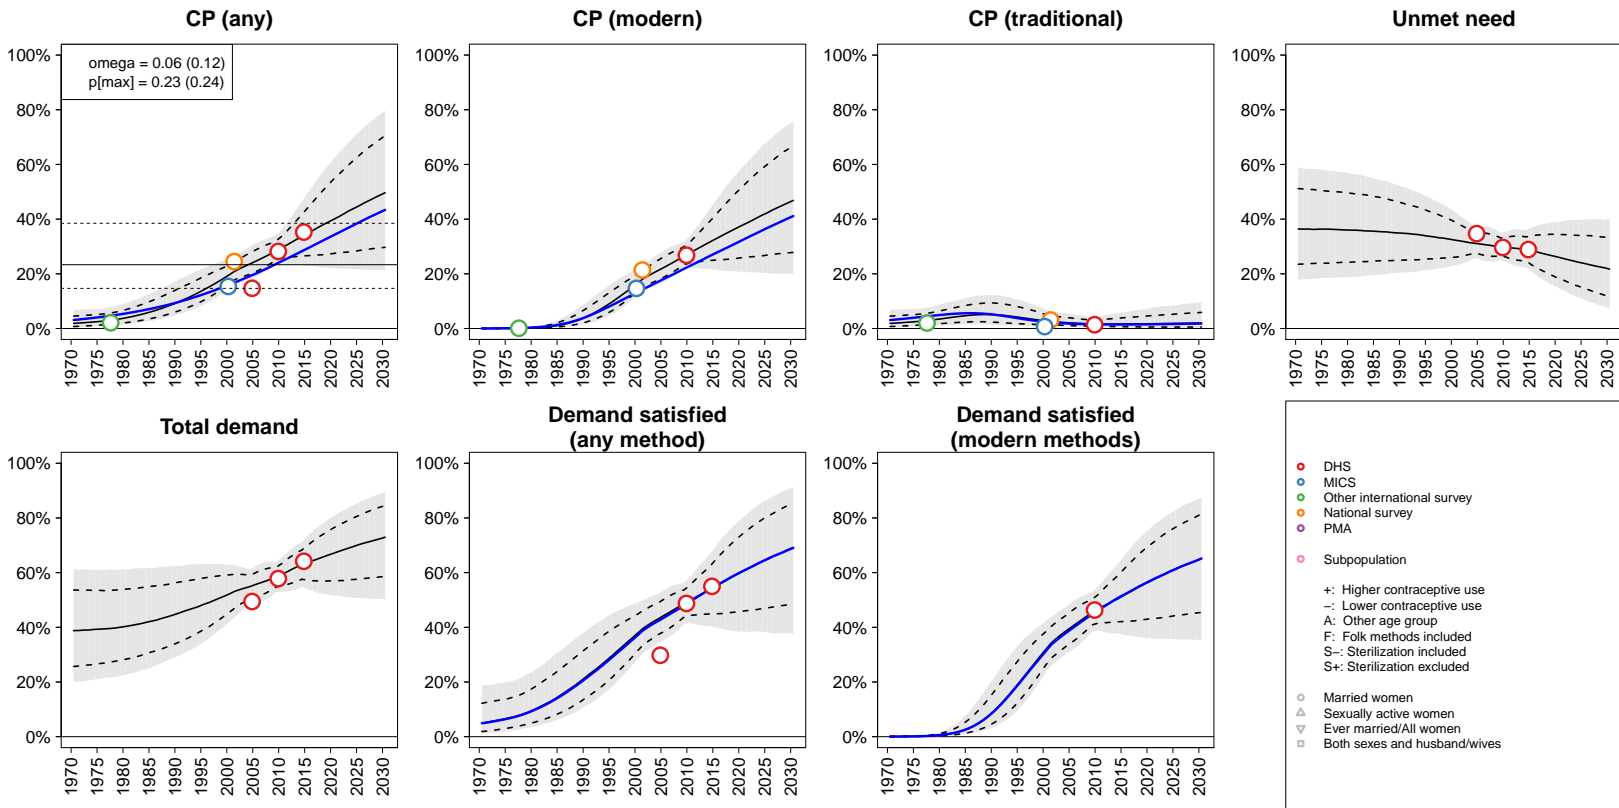



Liberia (Western Africa) --- Married / In-Union

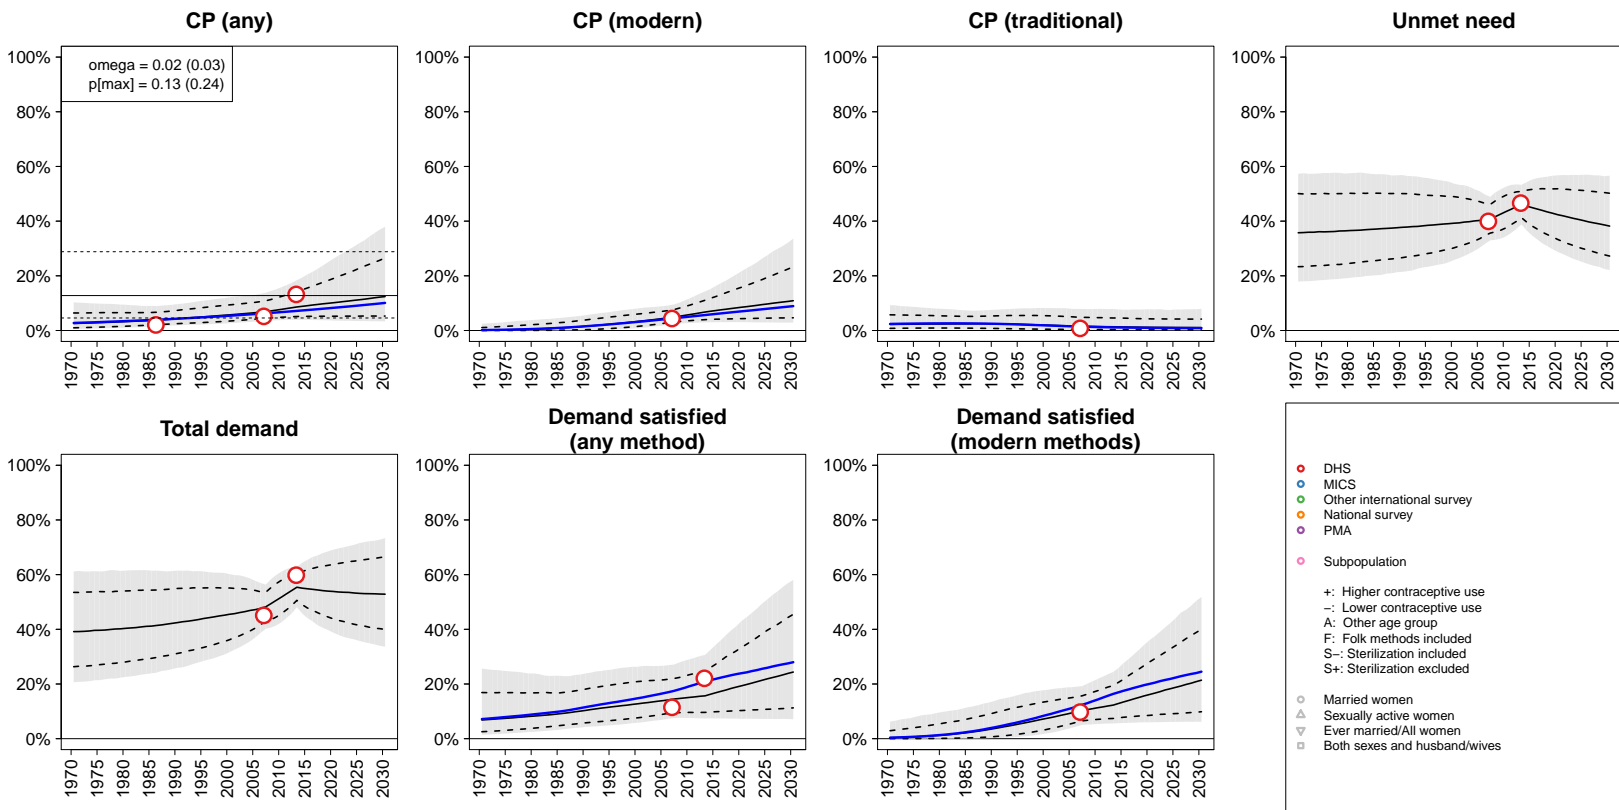

Madagascar (Eastern Africa) --- Married / In-Union

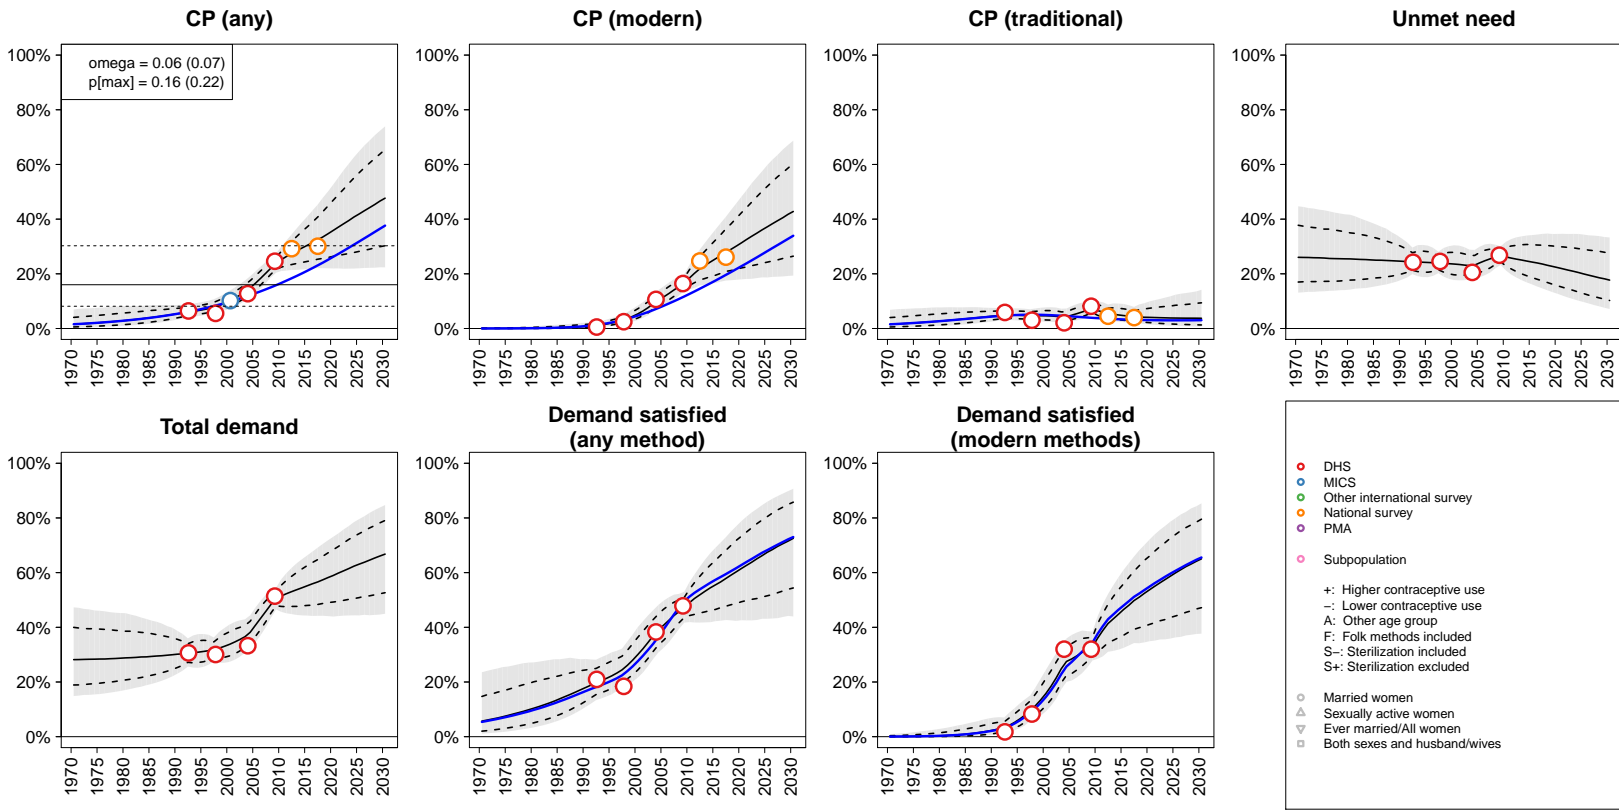

Malawi (Eastern Africa) --- Married / In-Union

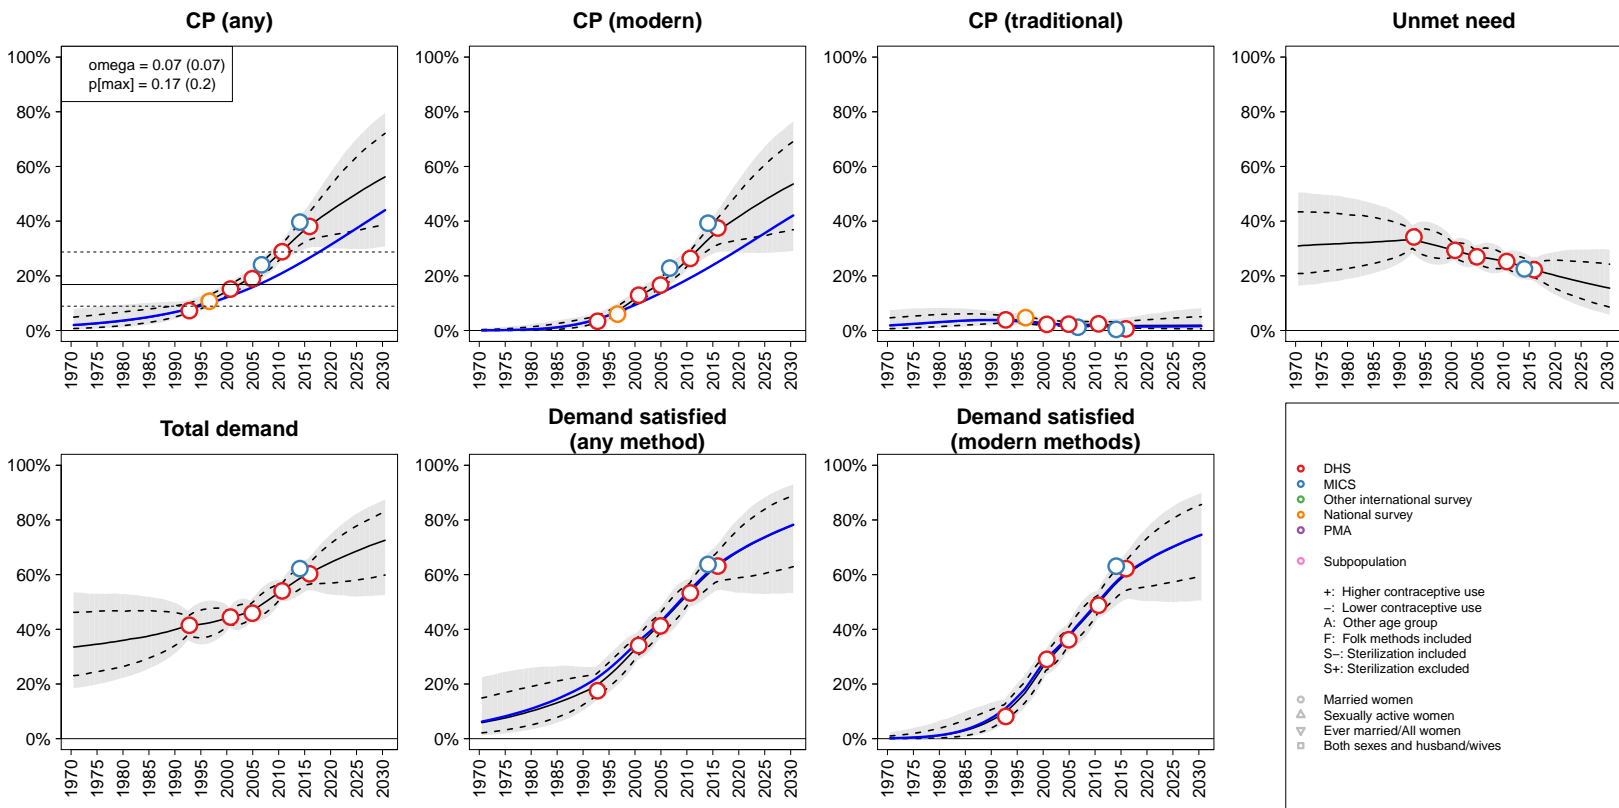

Malaysia (South-eastern Asia) --- Married / In-Union

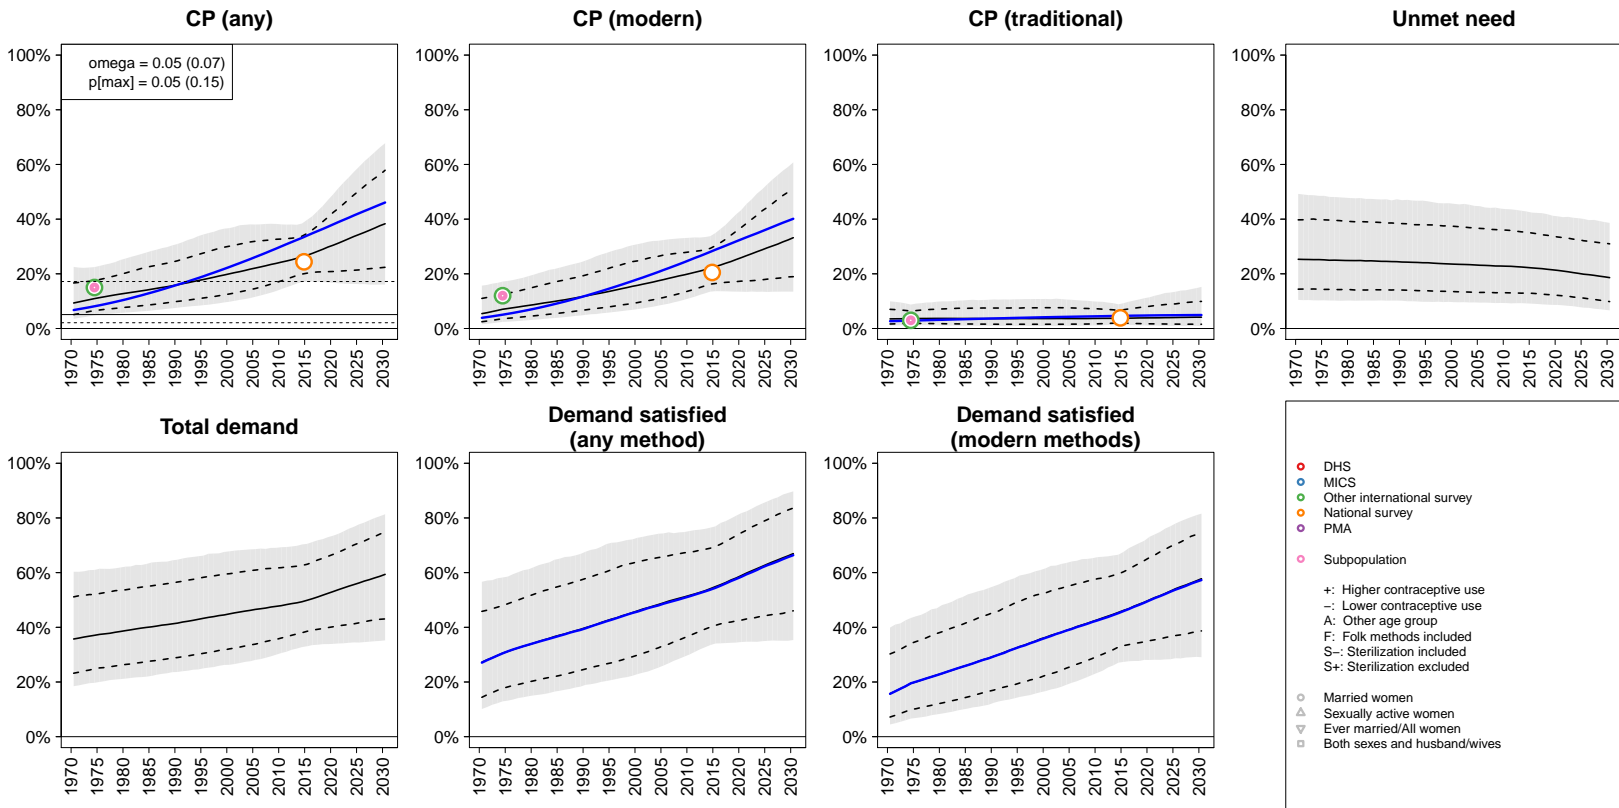

Mali (Western Africa) --- Married / In-Union

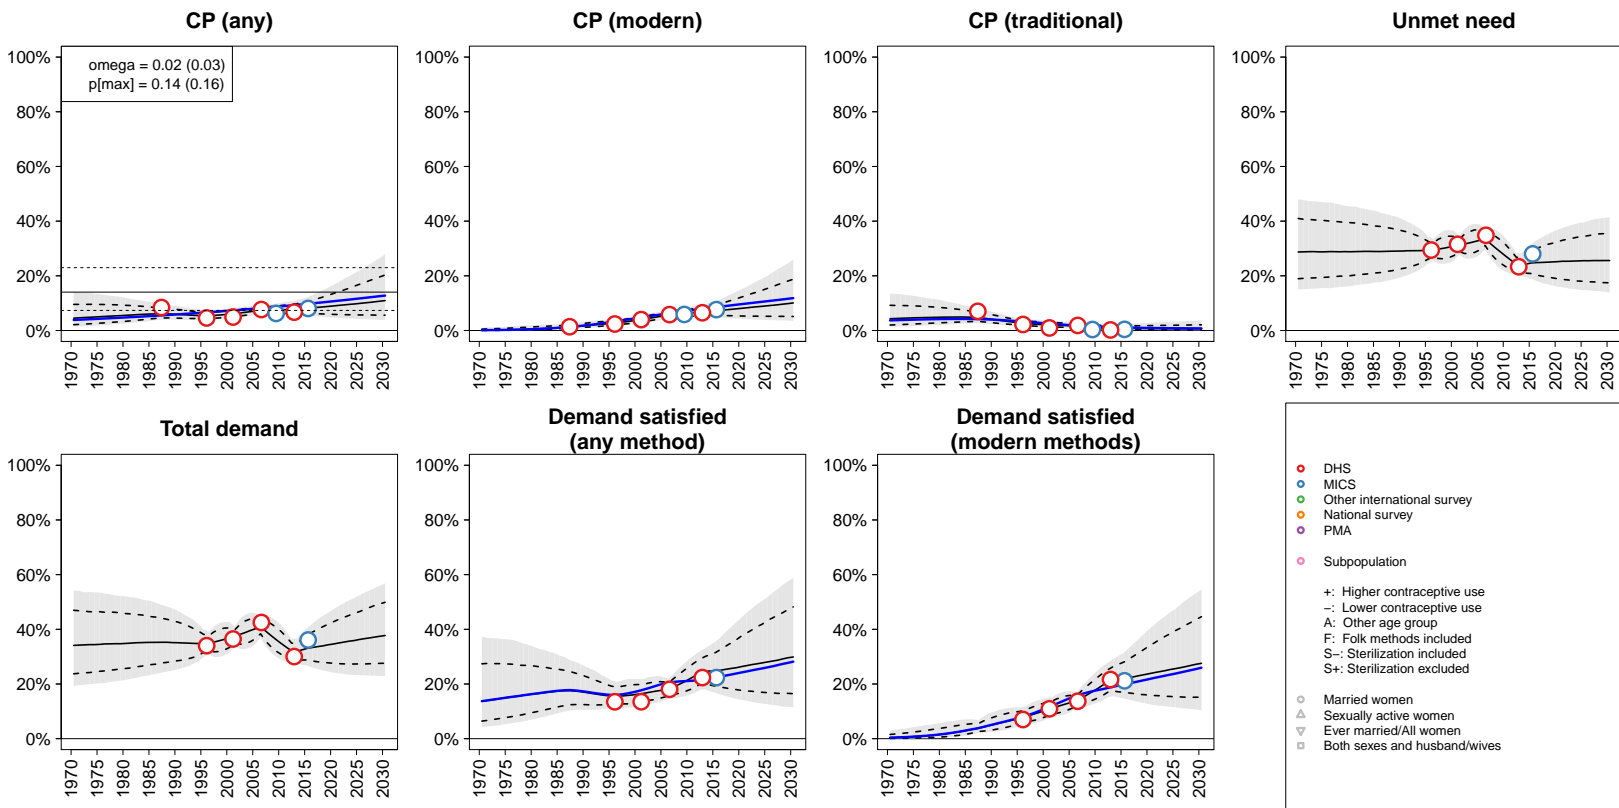

Mauritania (Western Africa) --- Married / In-Union

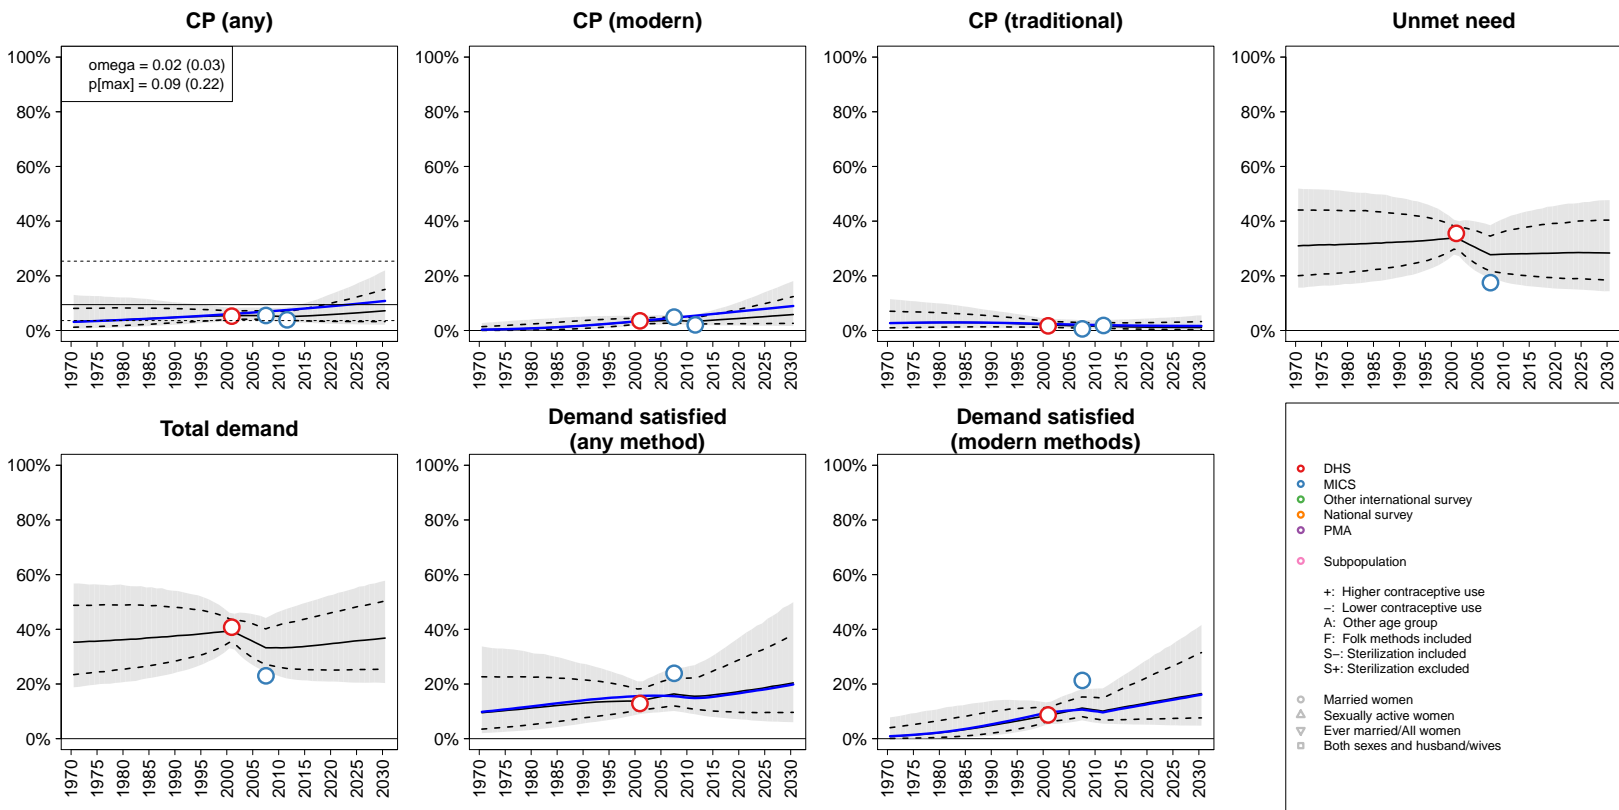

Mauritius (Eastern Africa) --- Married / In-Union

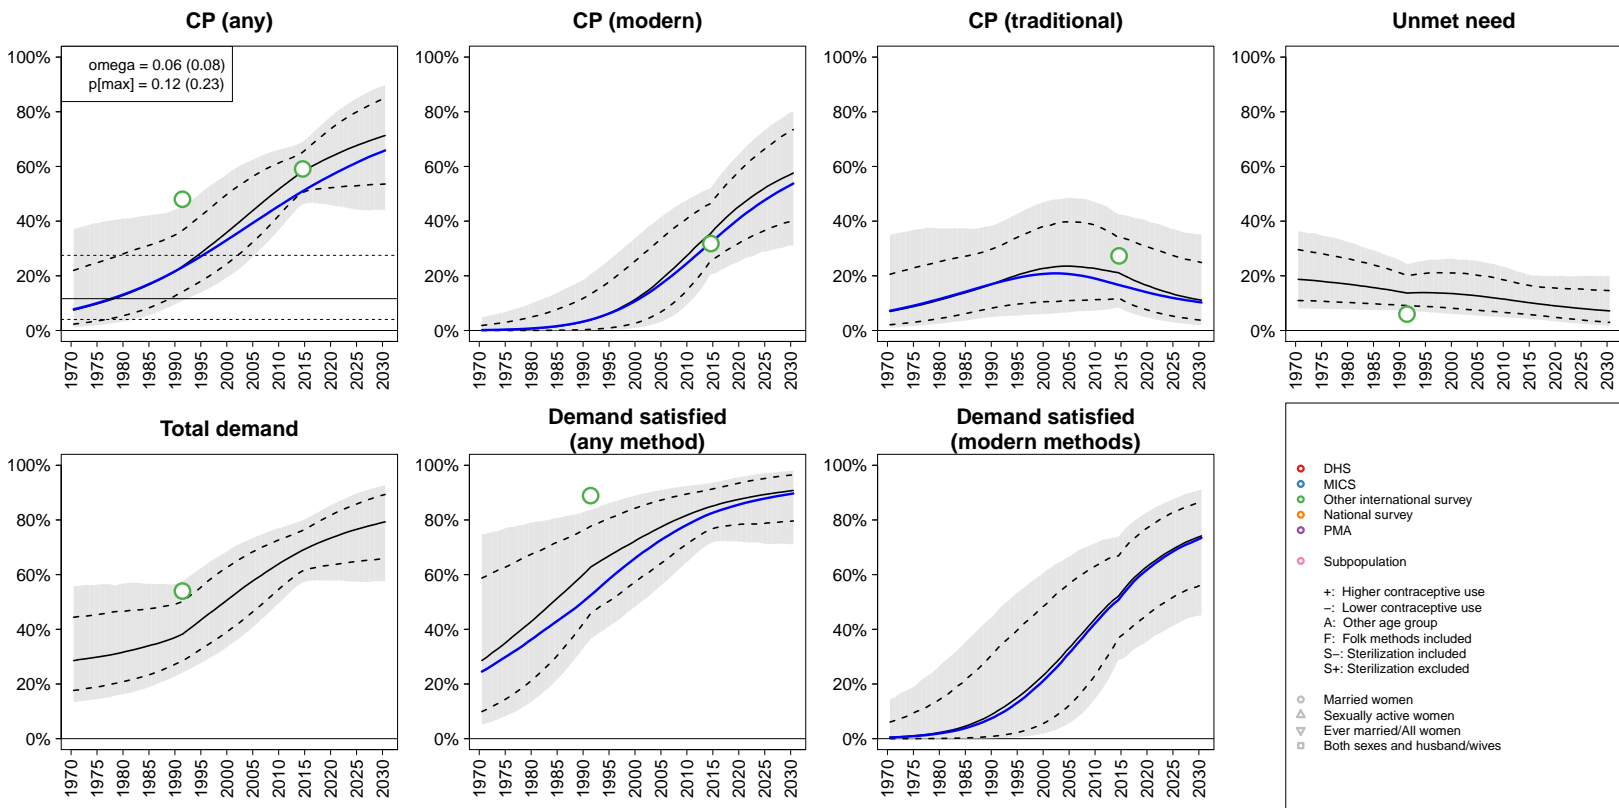

Mexico (Central America) --- Married / In-Union

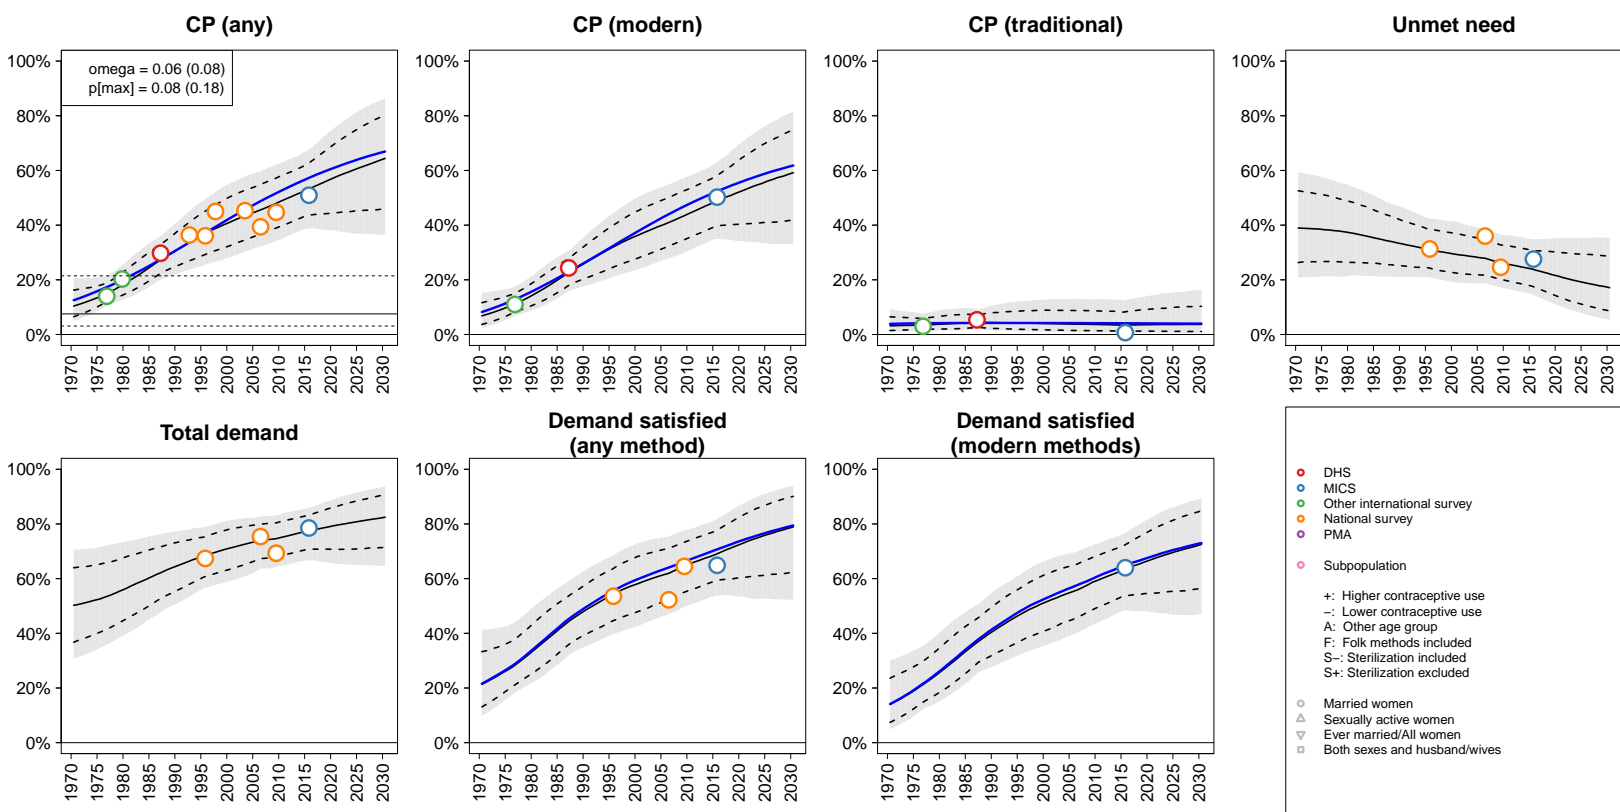



Mongolia (Eastern Asia) --- Married / In-Union

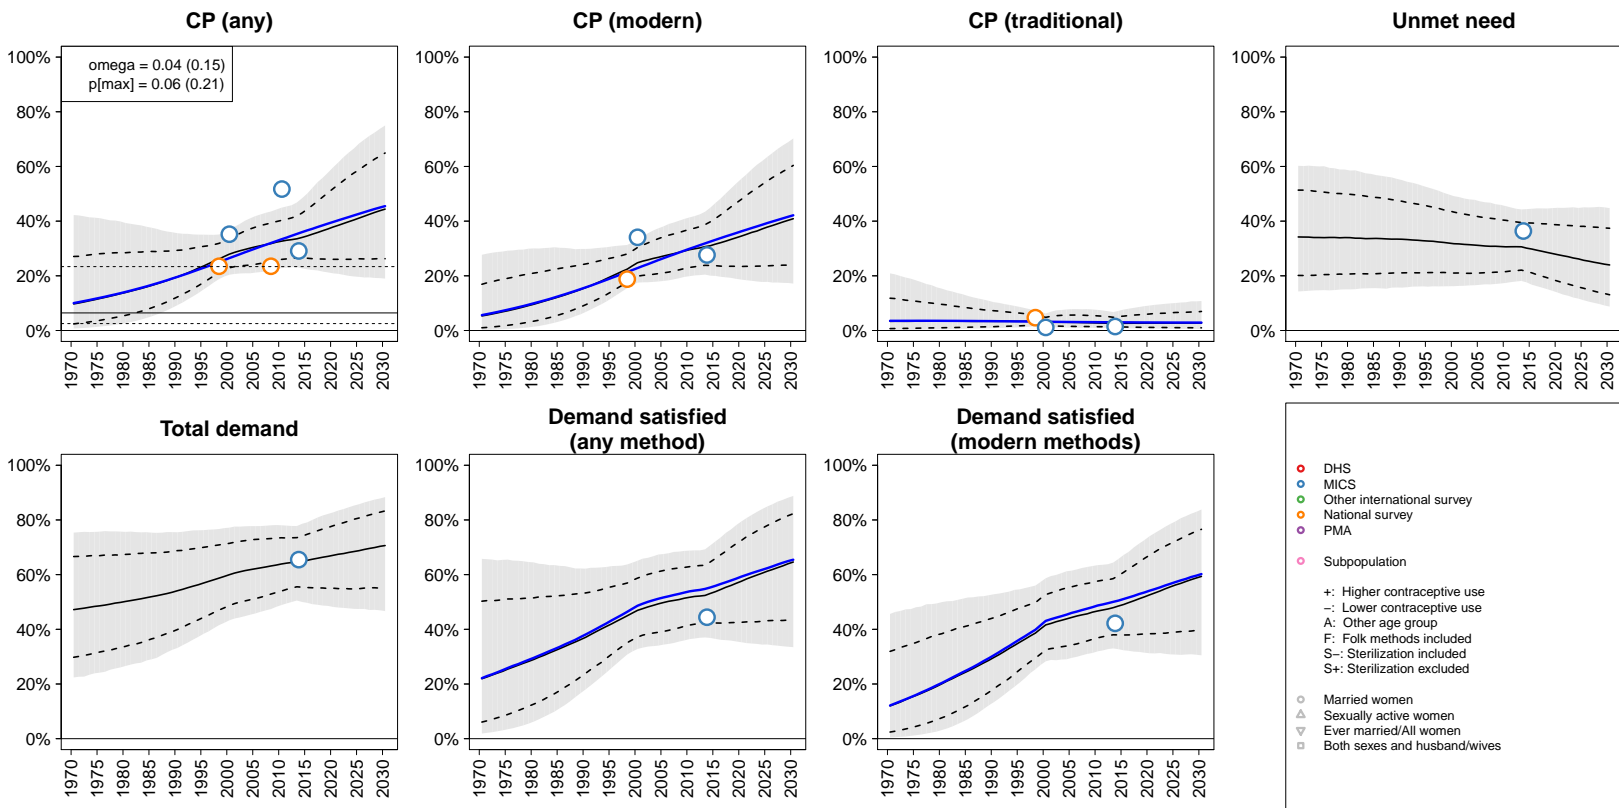

Morocco (Northern Africa) --- Married / In-Union

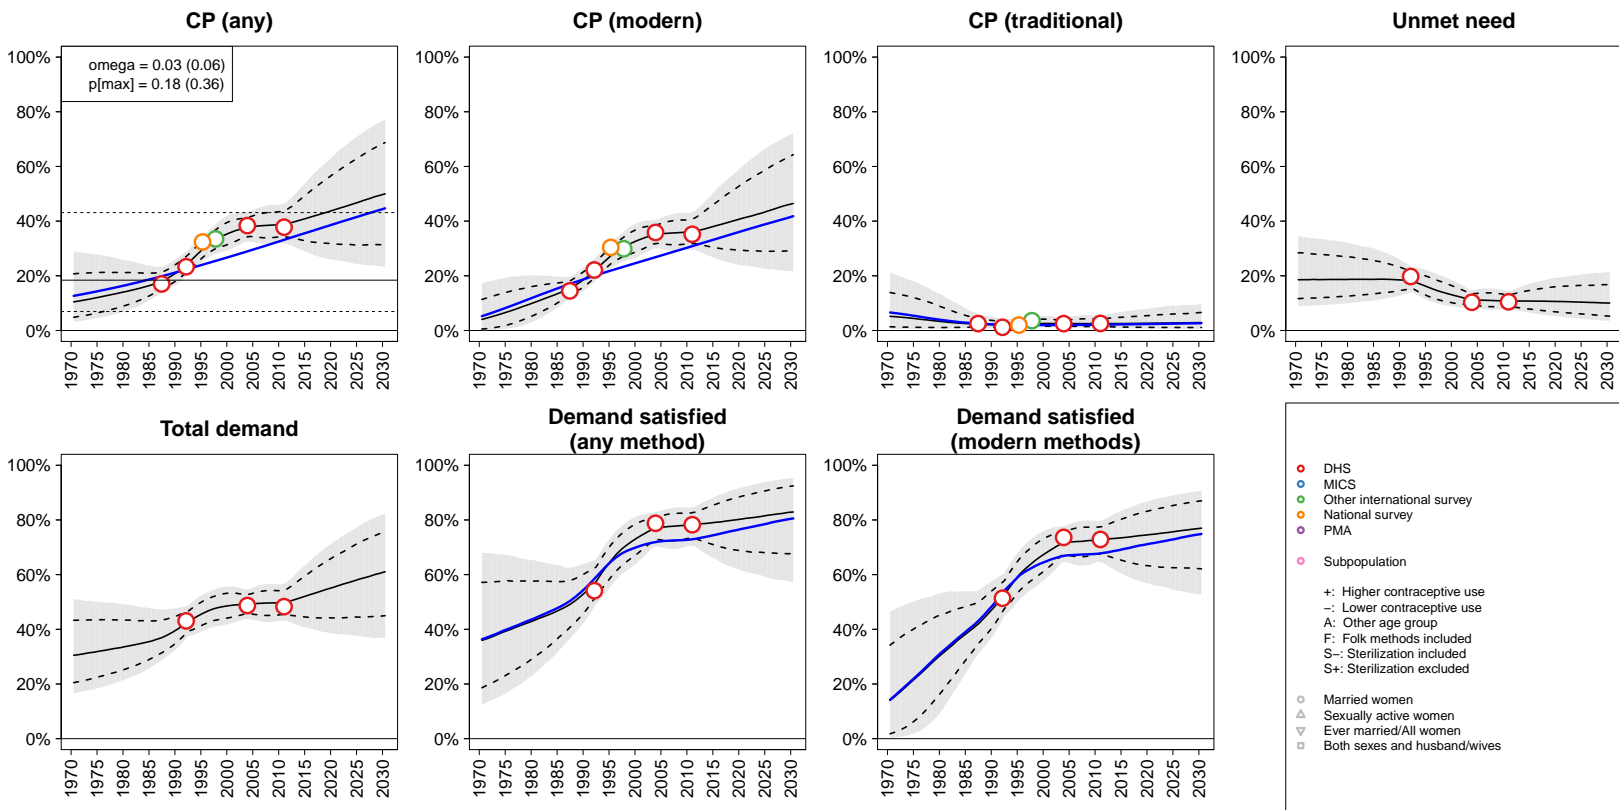

Mozambique (Eastern Africa) --- Married / In-Union

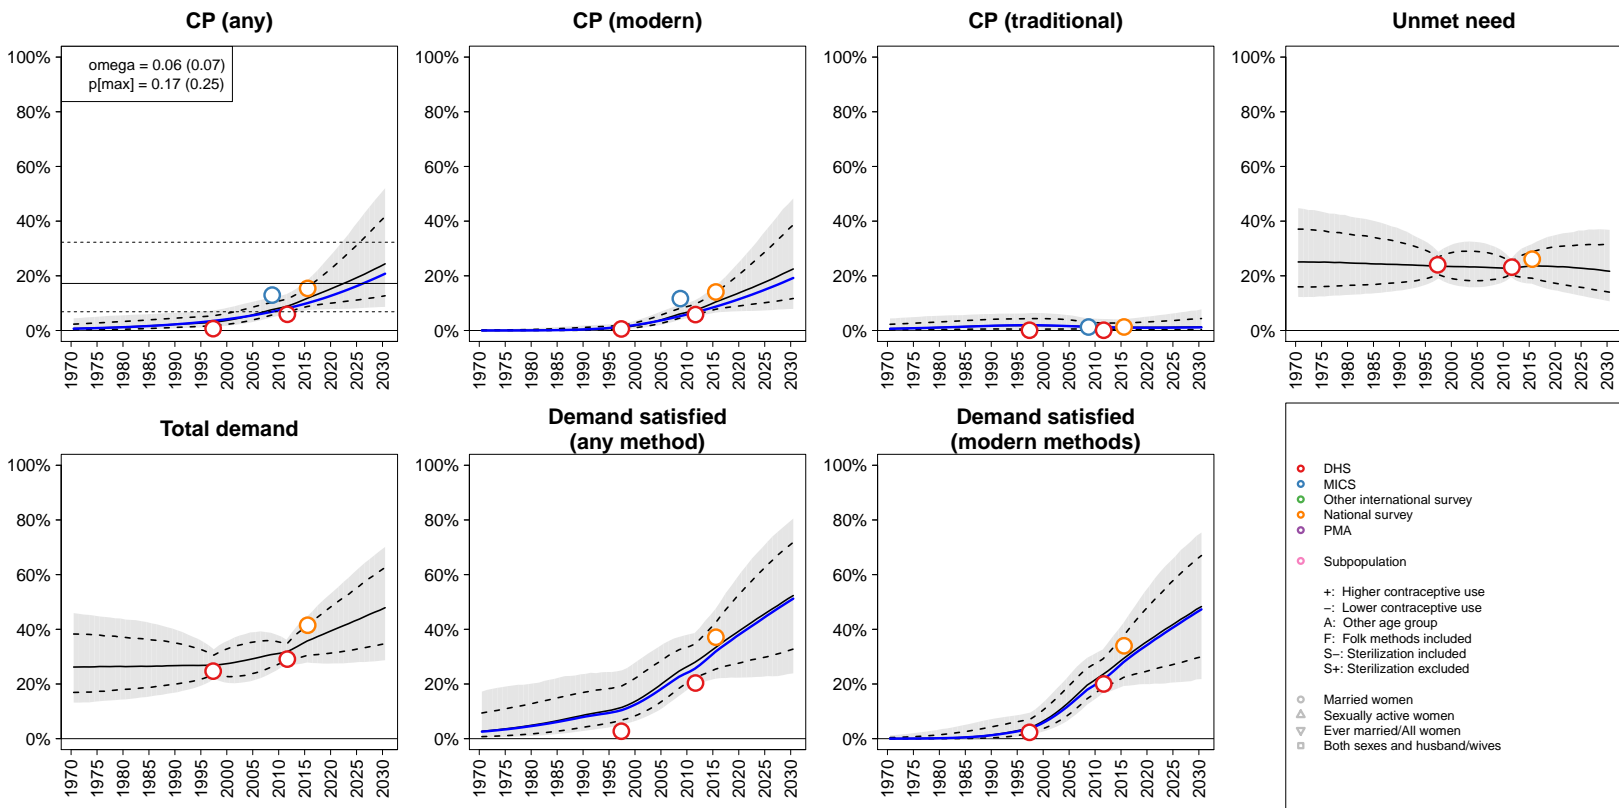

Myanmar (South-eastern Asia) --- Married / In-Union

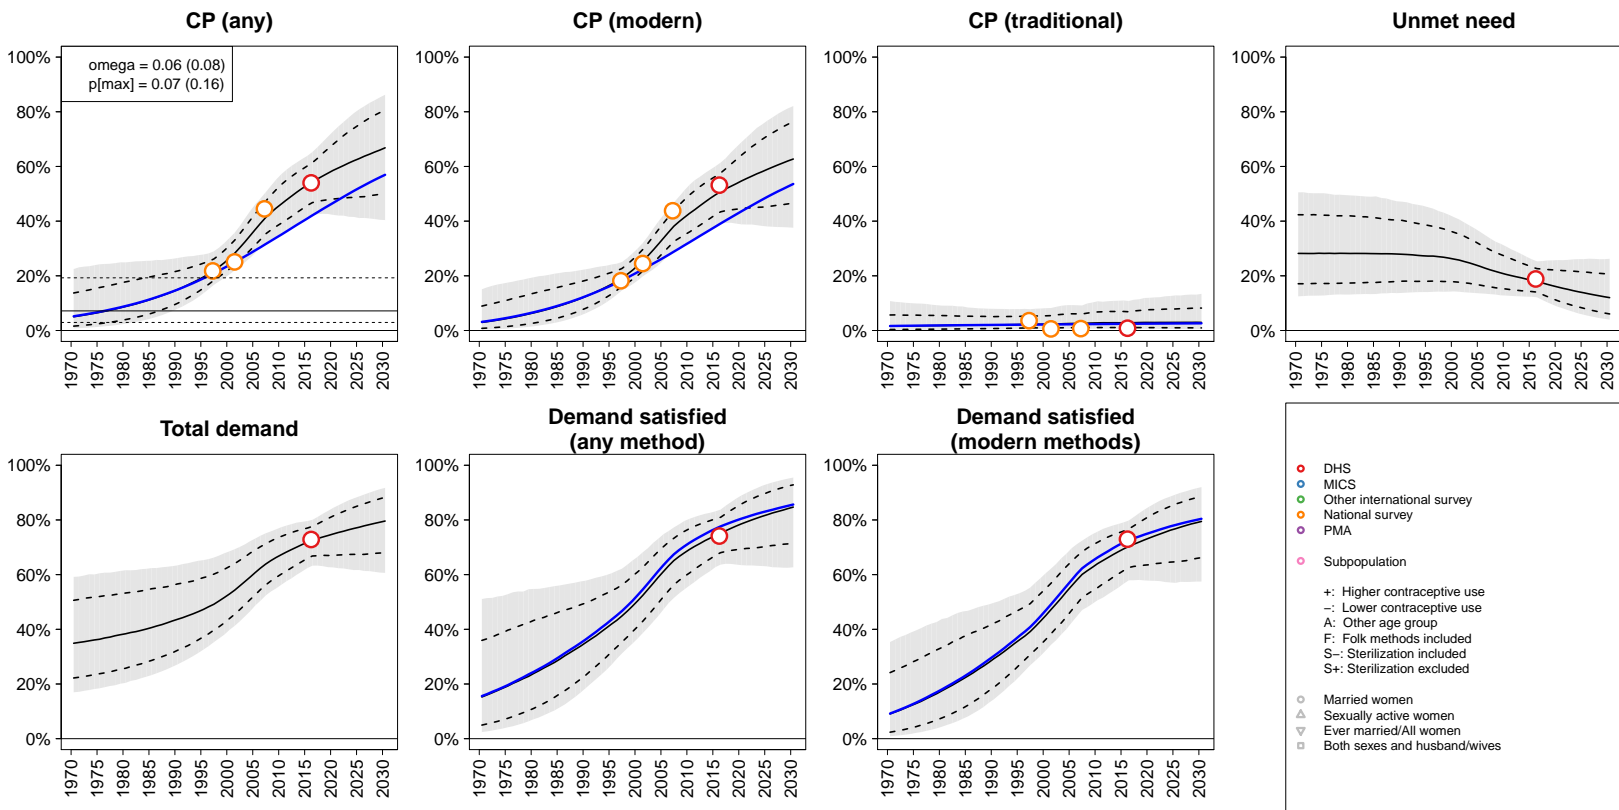

Namibia (Southern Africa) --- Married / In-Union

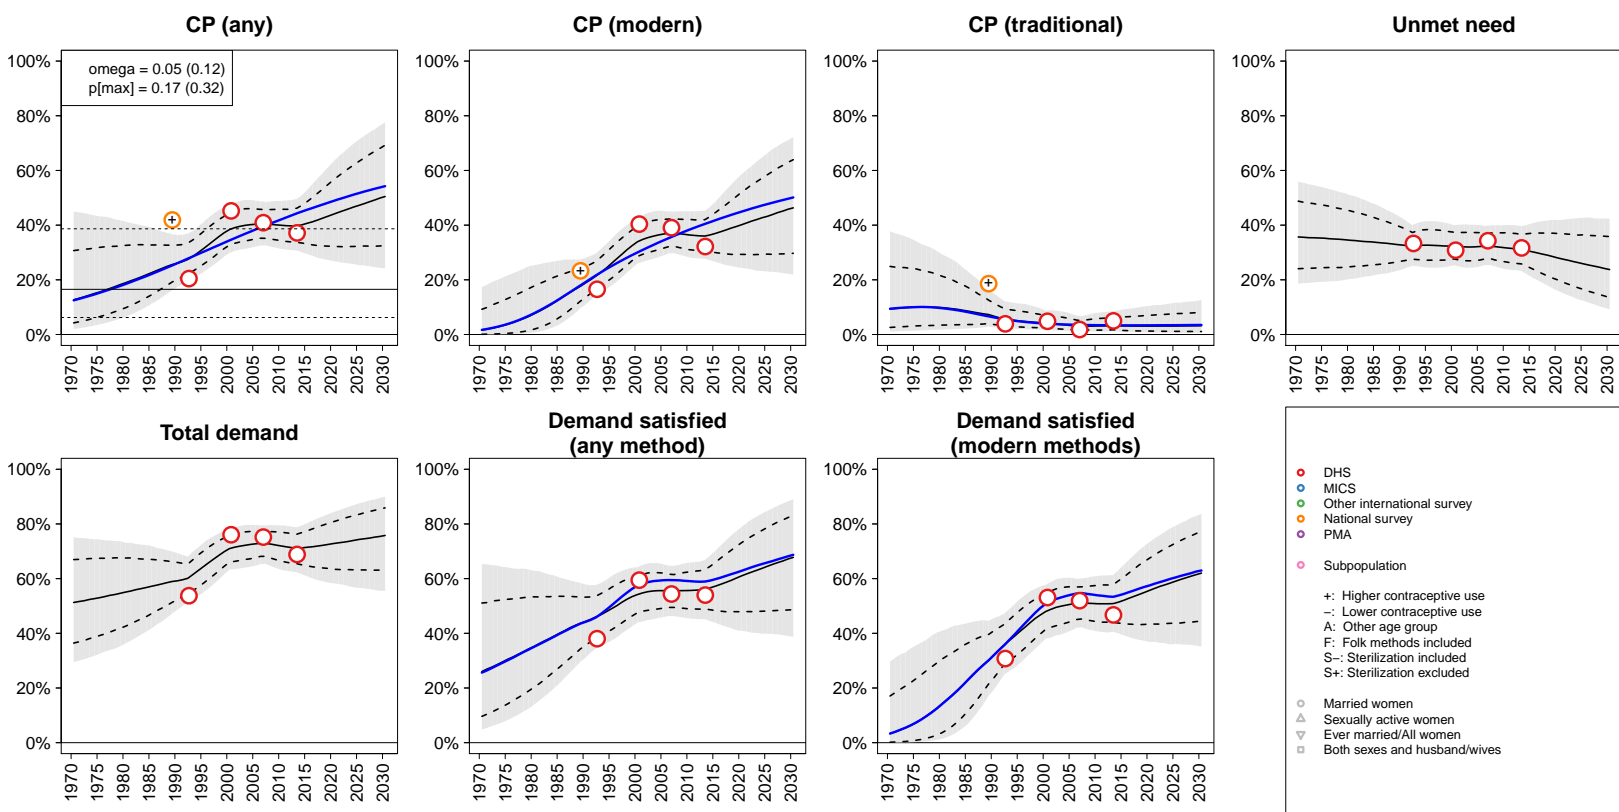

Nepal (Southern Asia) --- Married / In-Union

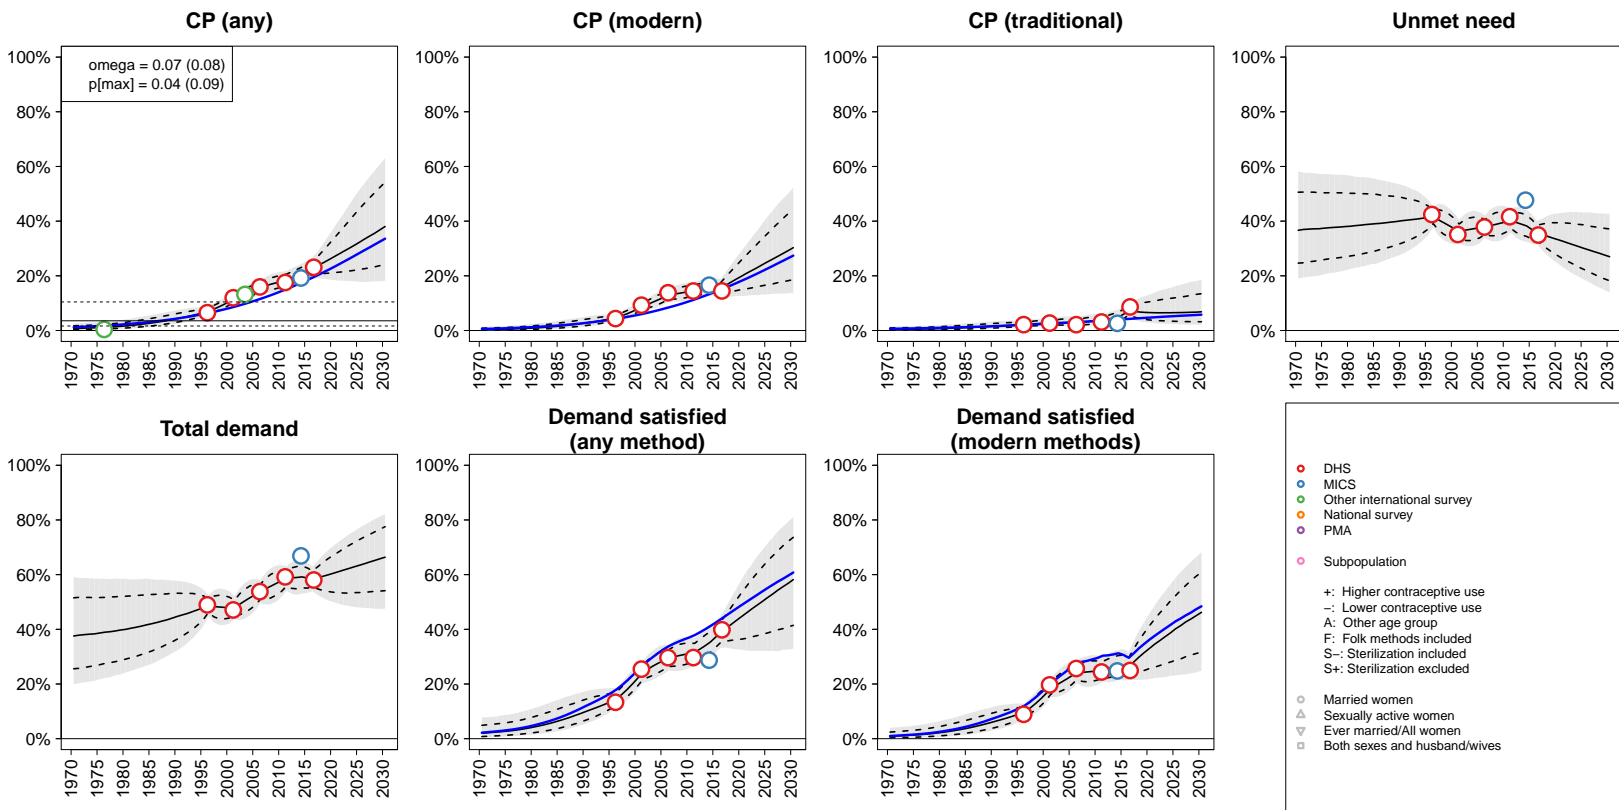

Nicaragua (Central America) --- Married / In-Union

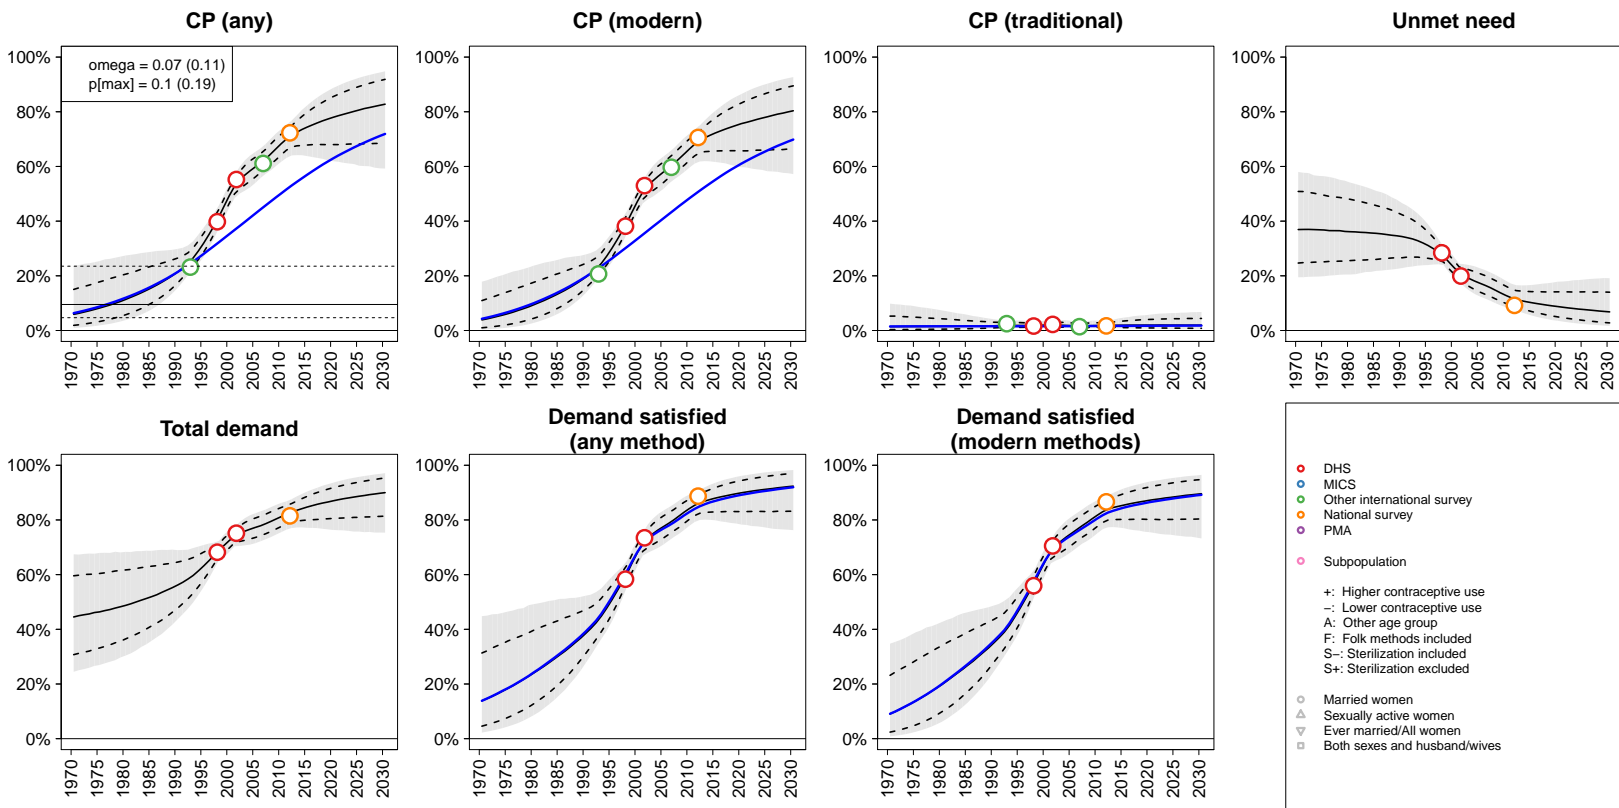

Niger (Western Africa) --- Married / In-Union

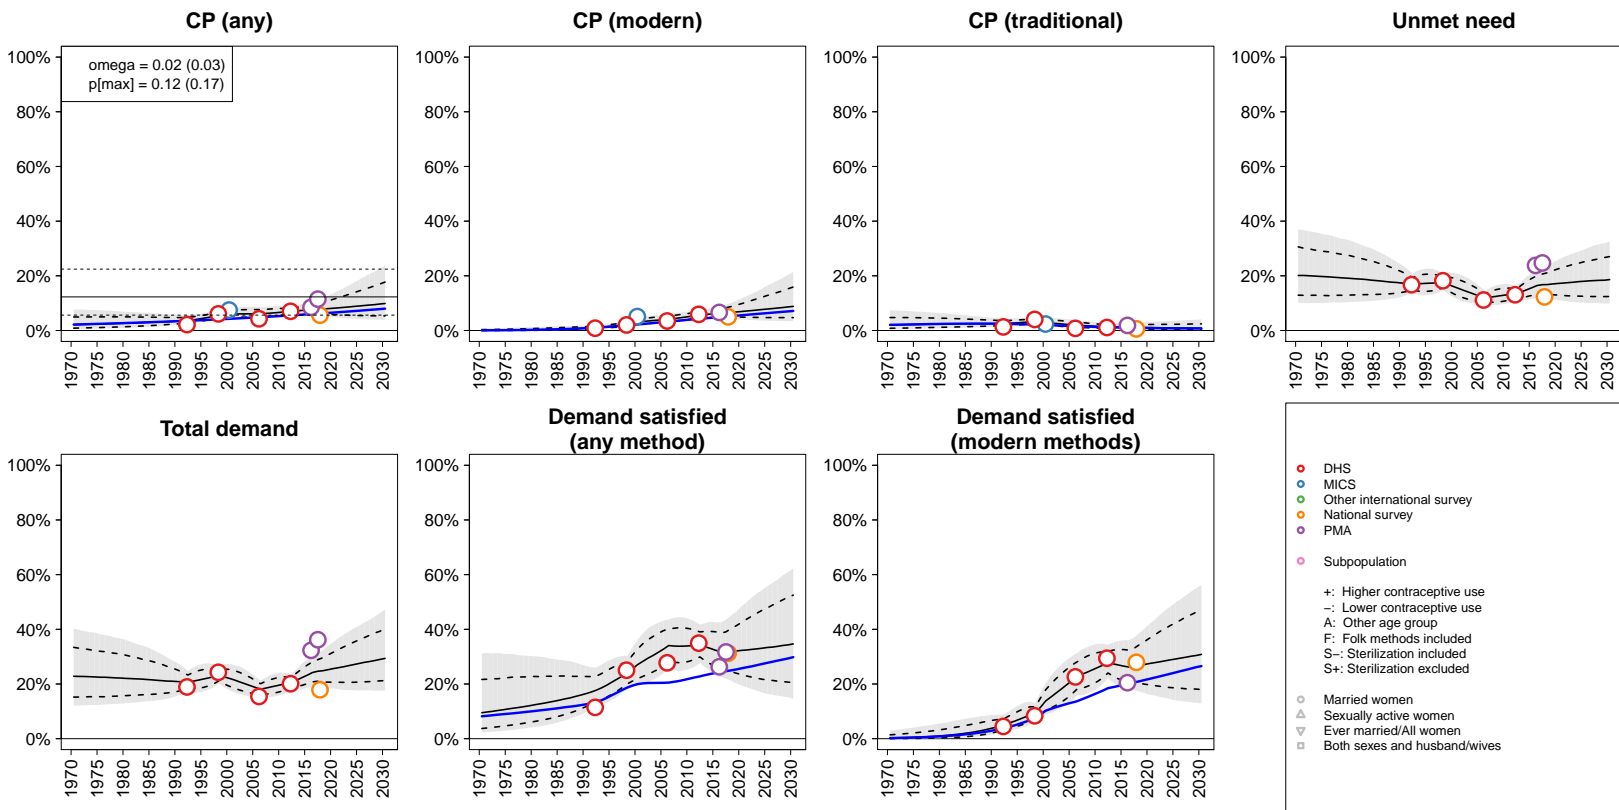



Nigeria (Western Africa) --- Married / In-Union

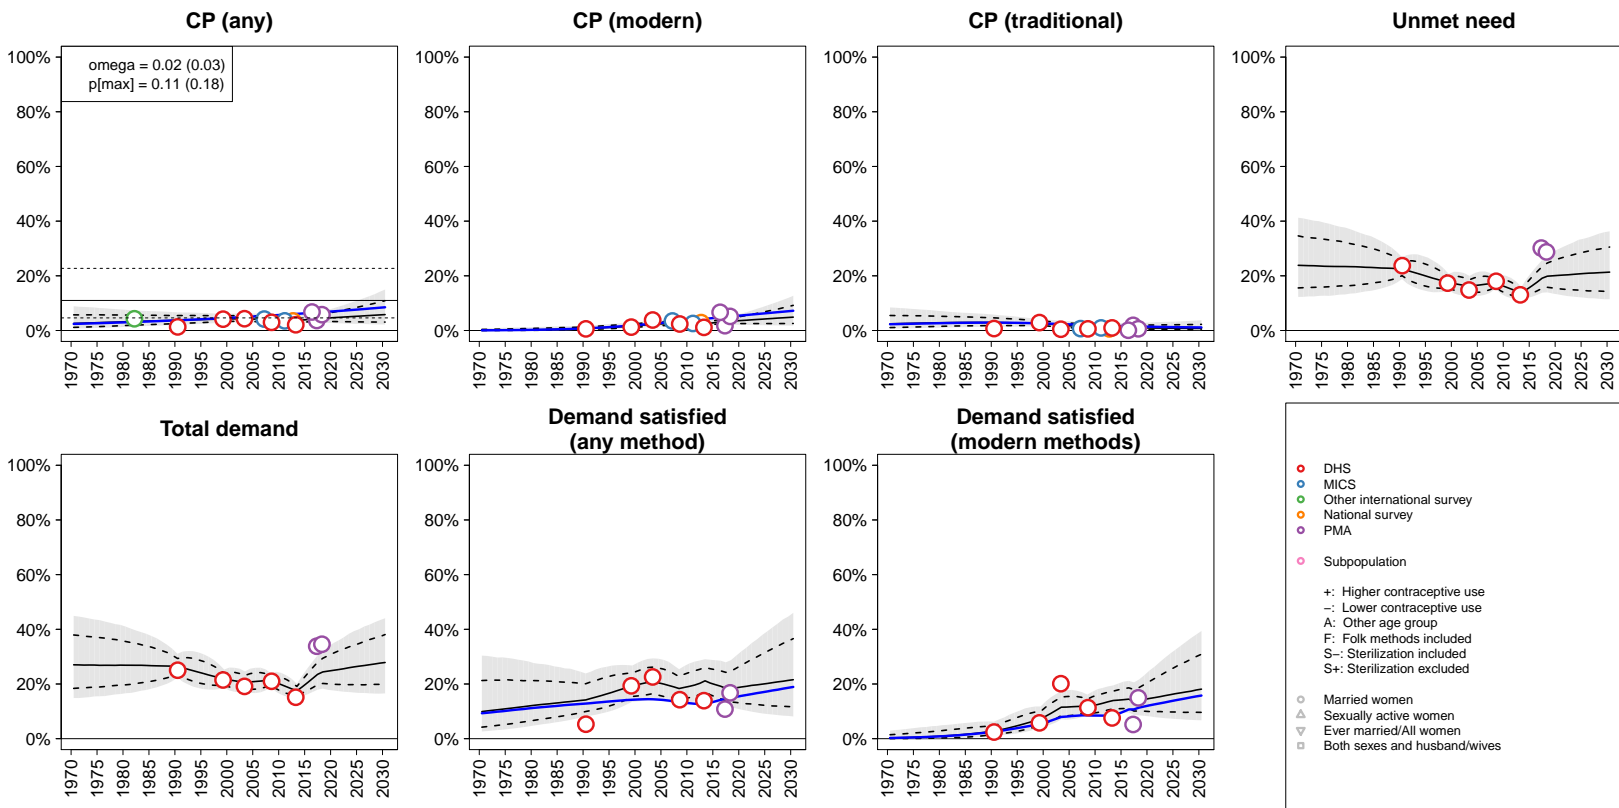

Oman (Western Asia) --- Married / In-Union

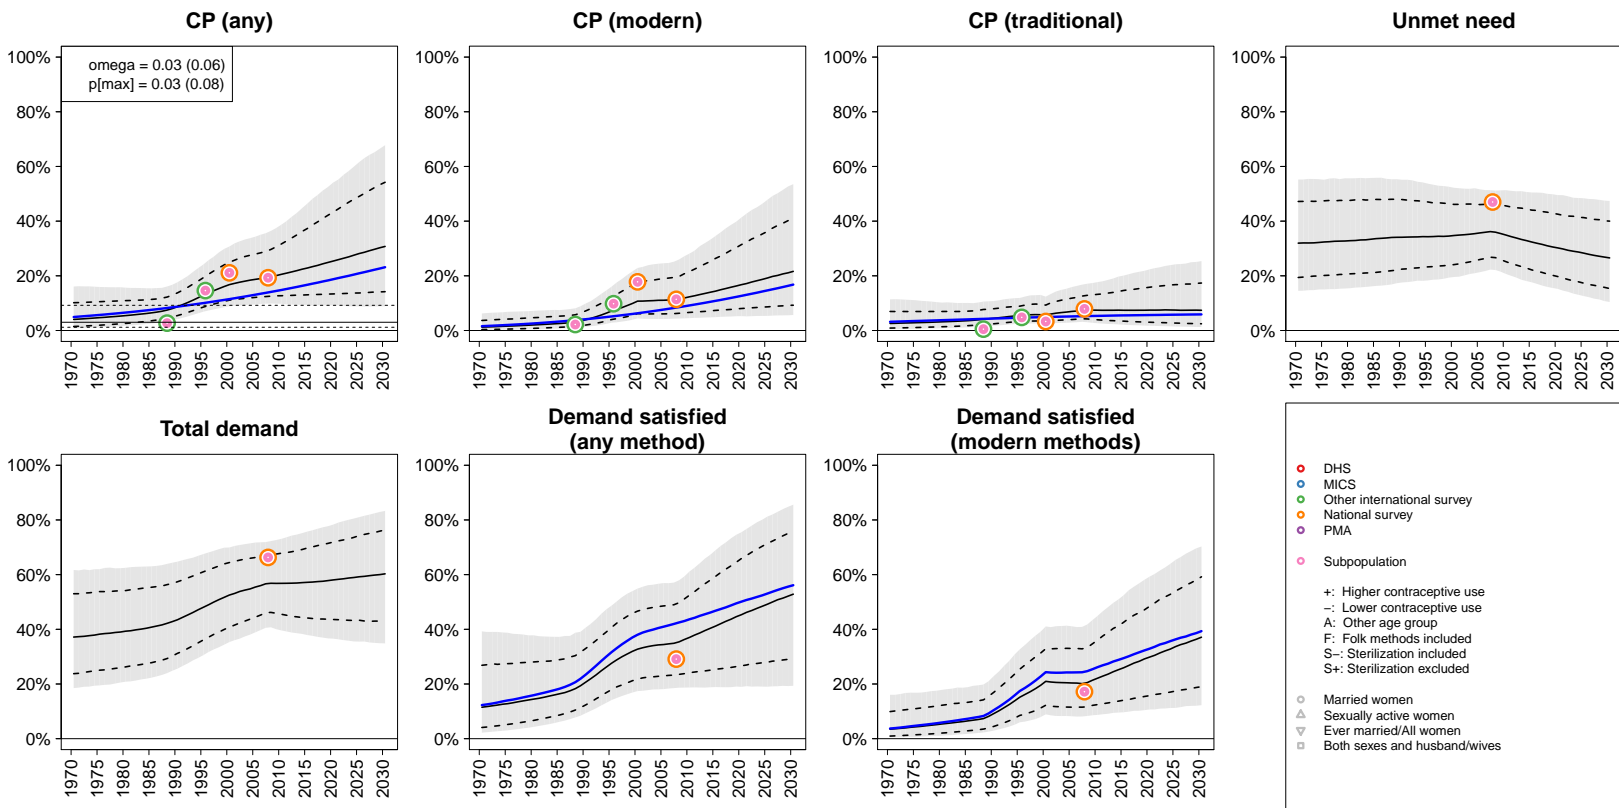

Pakistan (Southern Asia) --- Married / In-Union

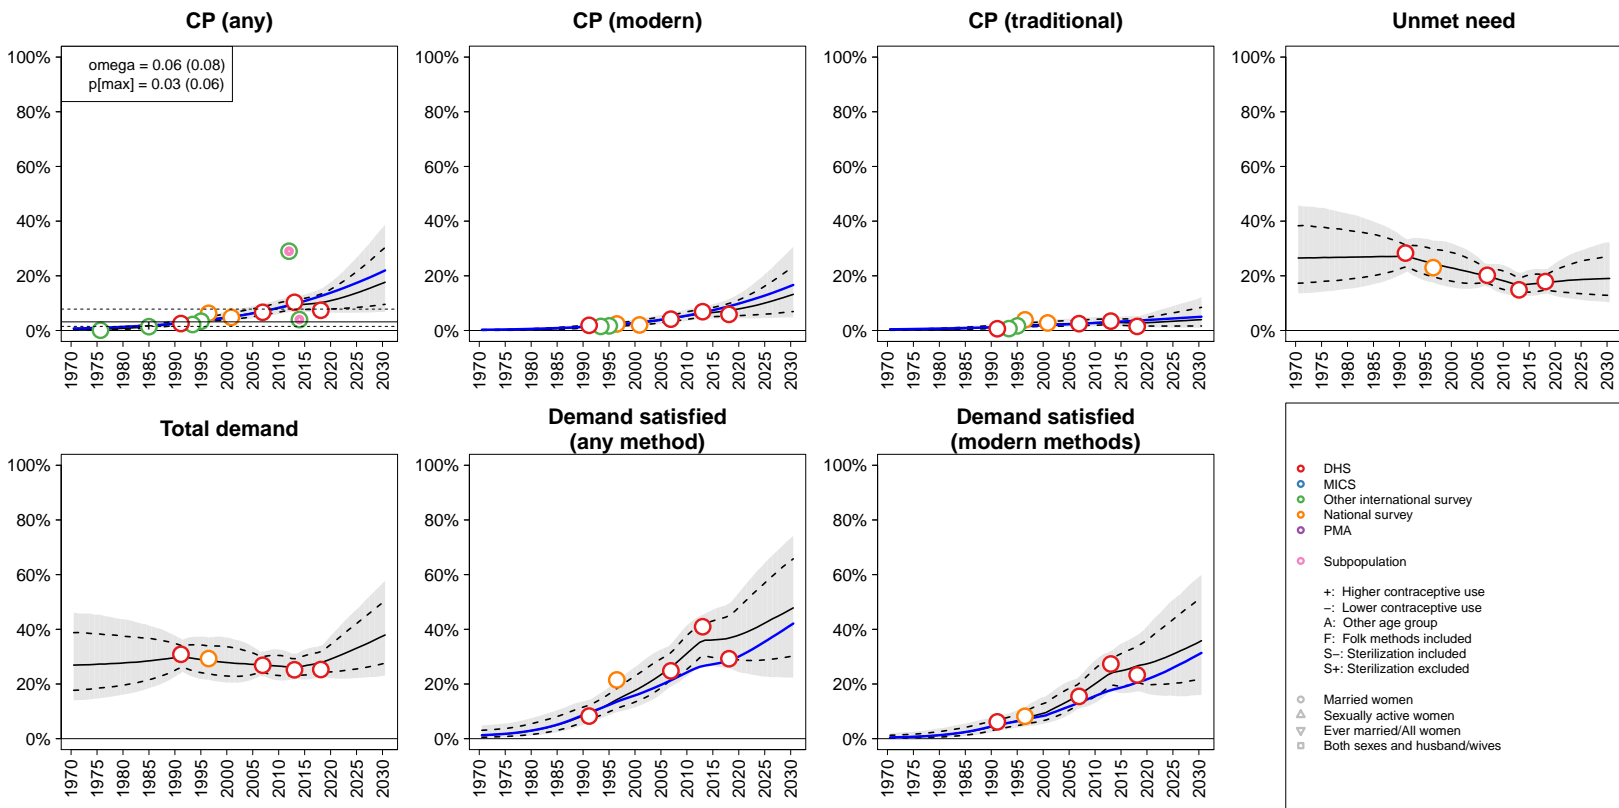

Panama (Central America) --- Married / In-Union

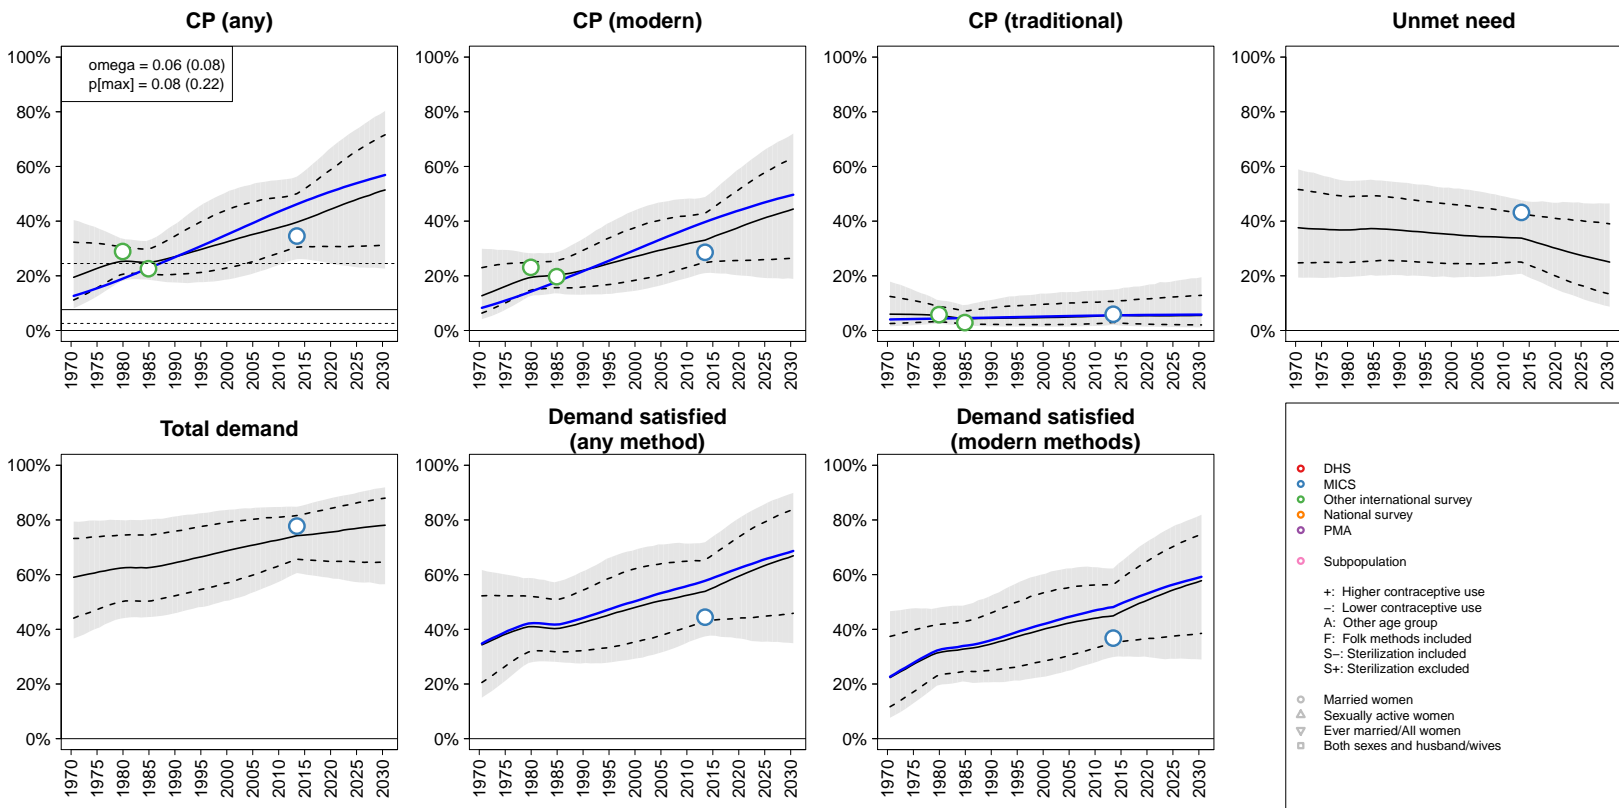

Papua New Guinea (Melanesia) --- Married / In-Union

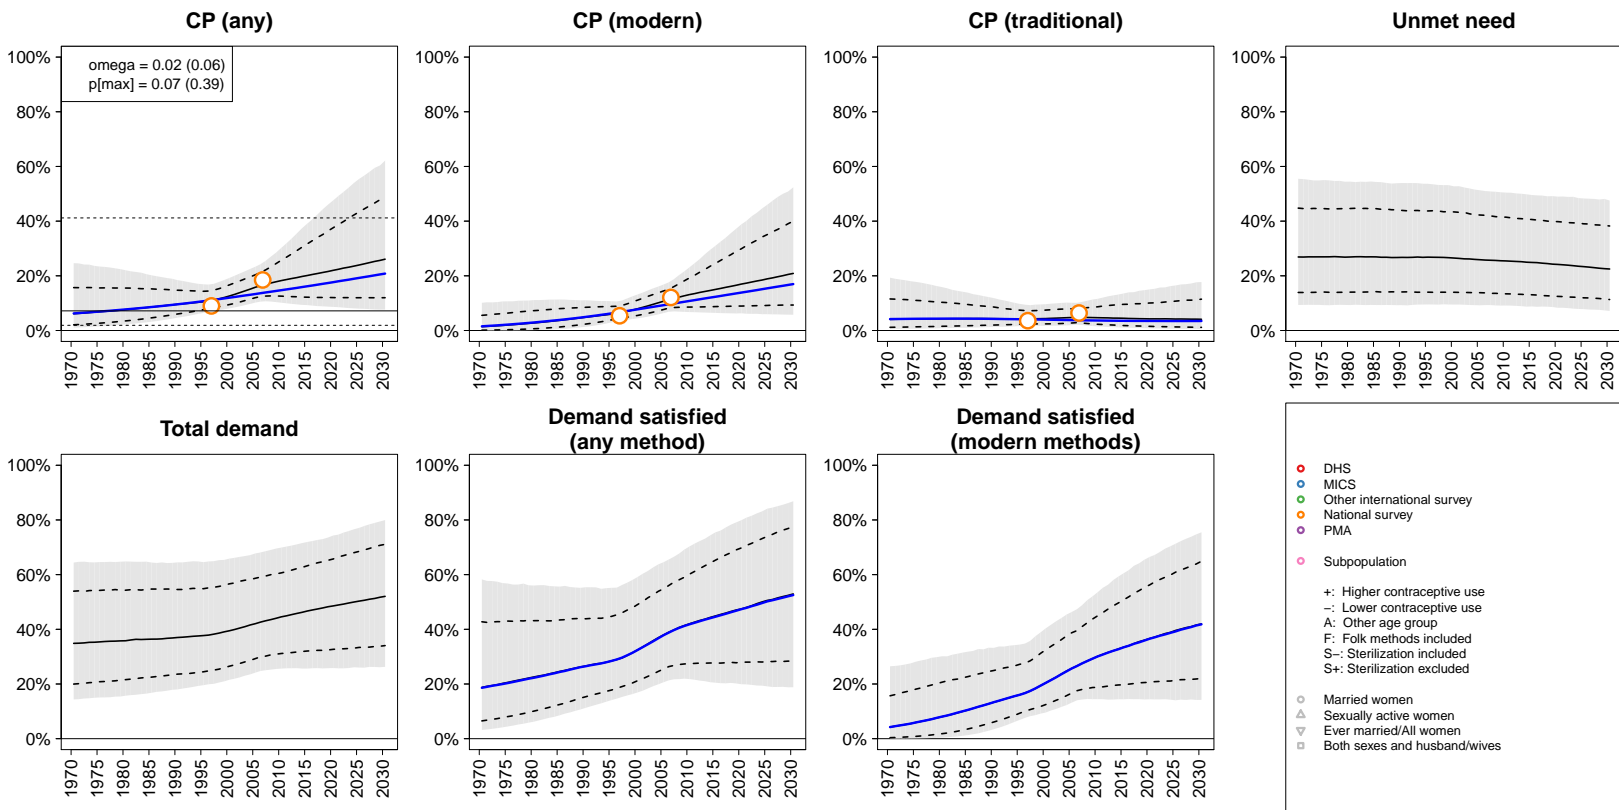

Paraguay (South America) --- Married / In-Union

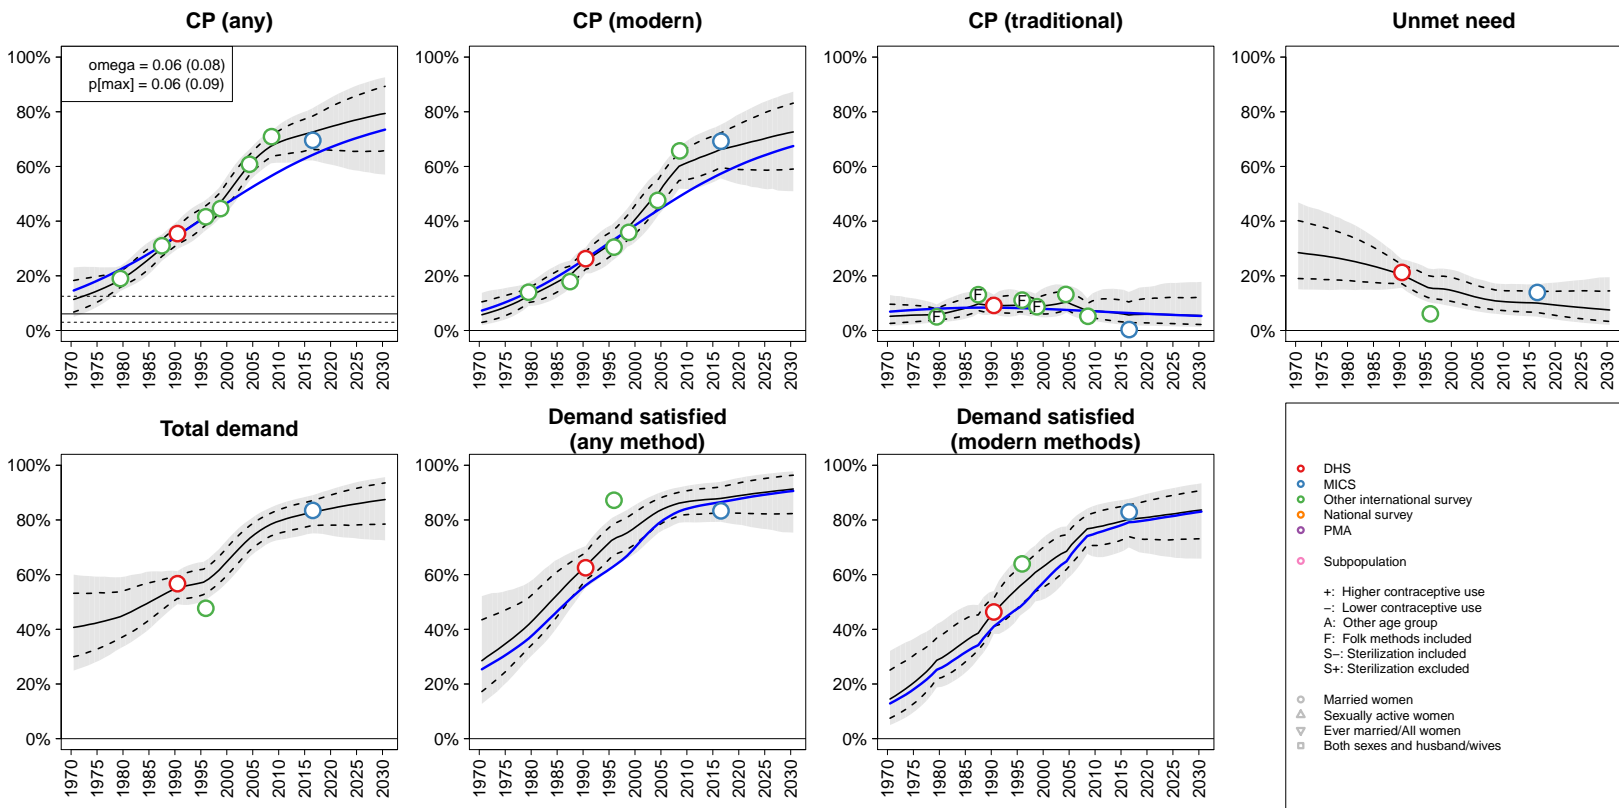

Peru (South America) --- Married / In-Union

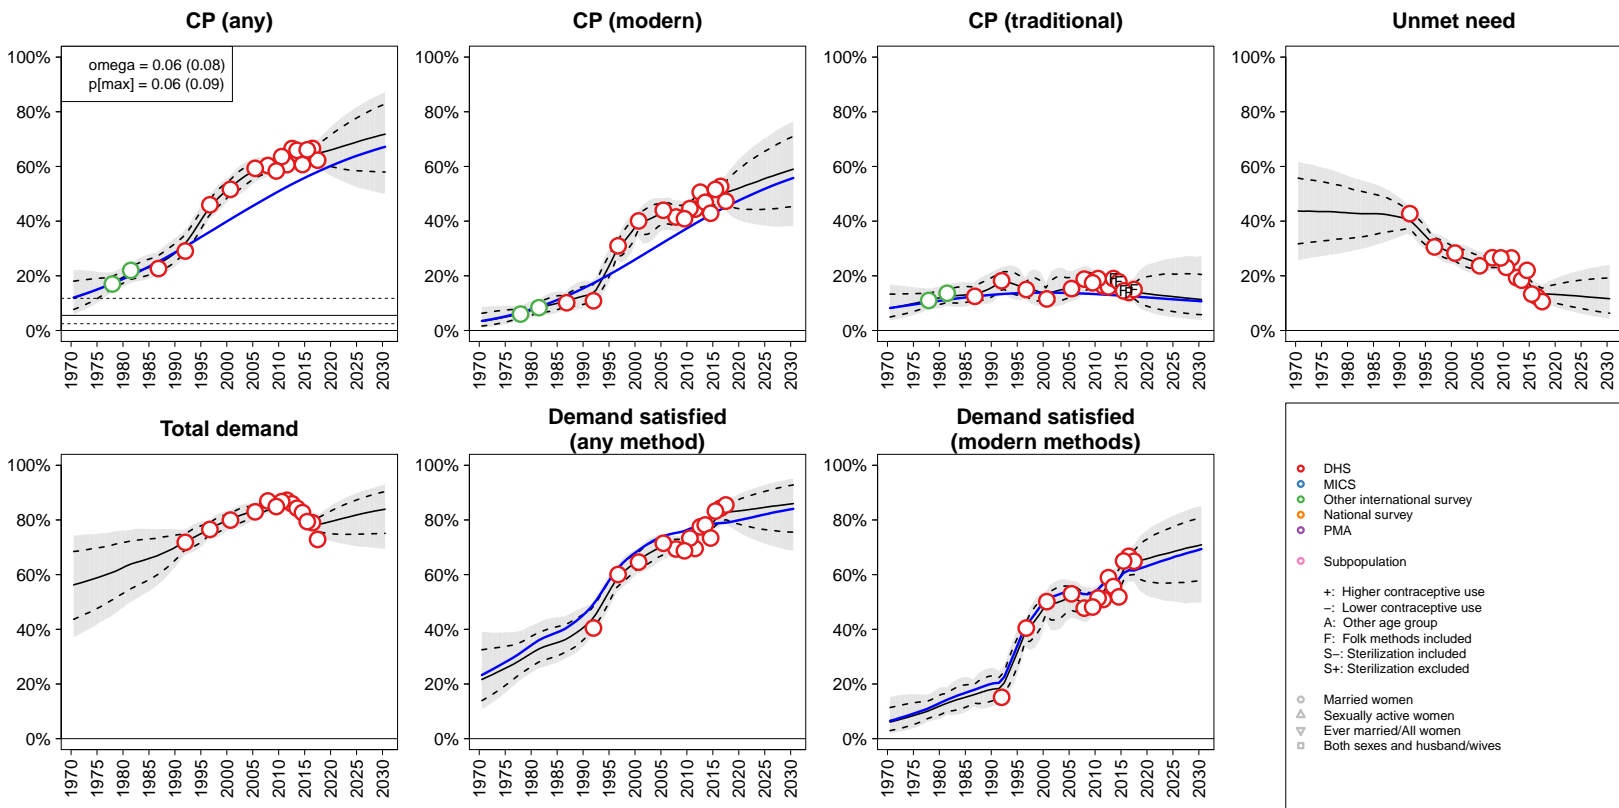

Philippines (South-eastern Asia) --- Married / In-Union

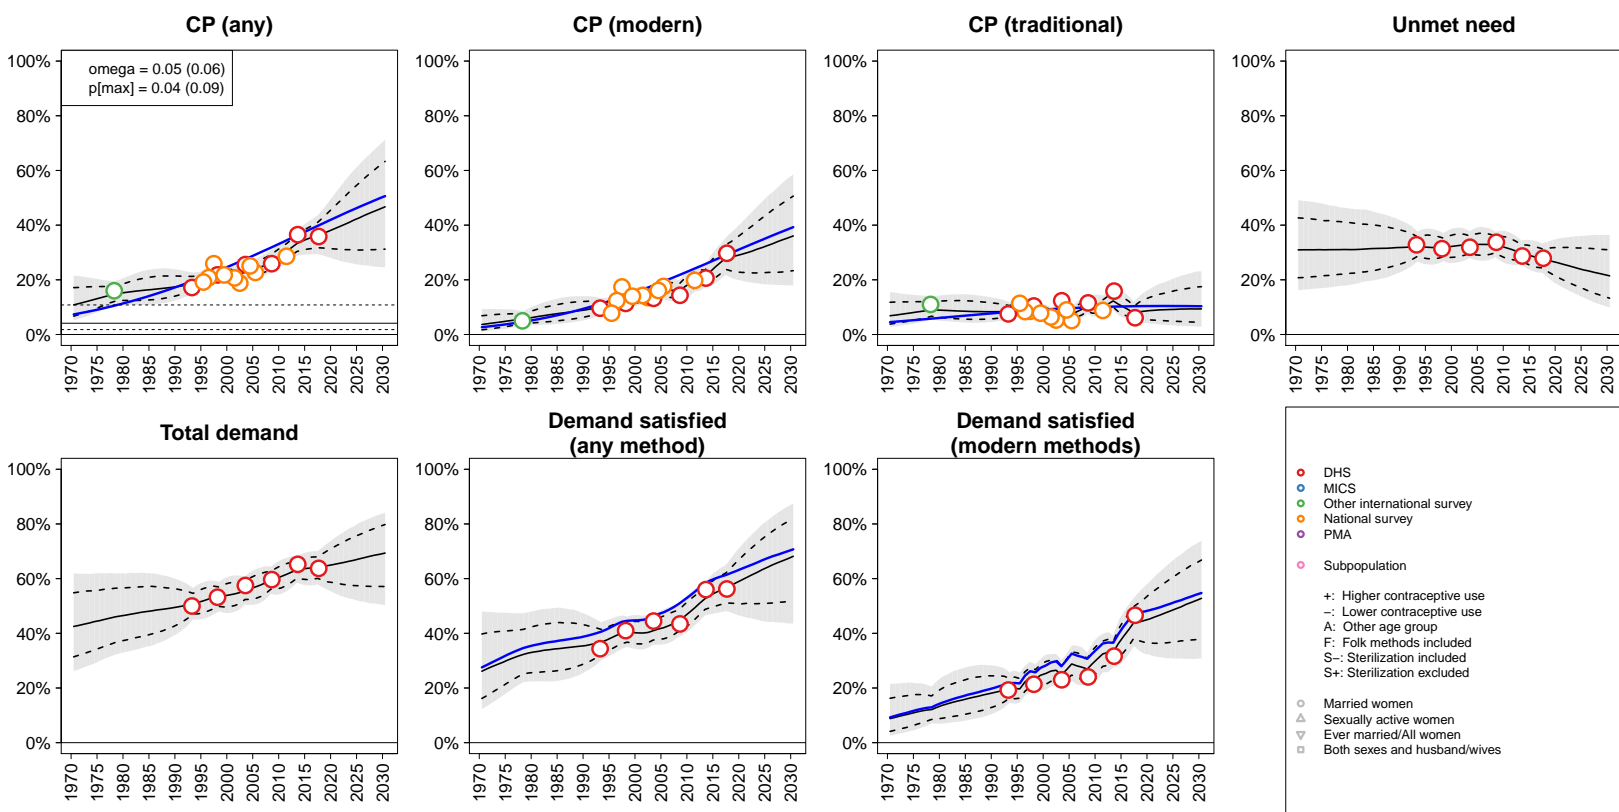



Portugal (Southern Europe) --- Married / In-Union

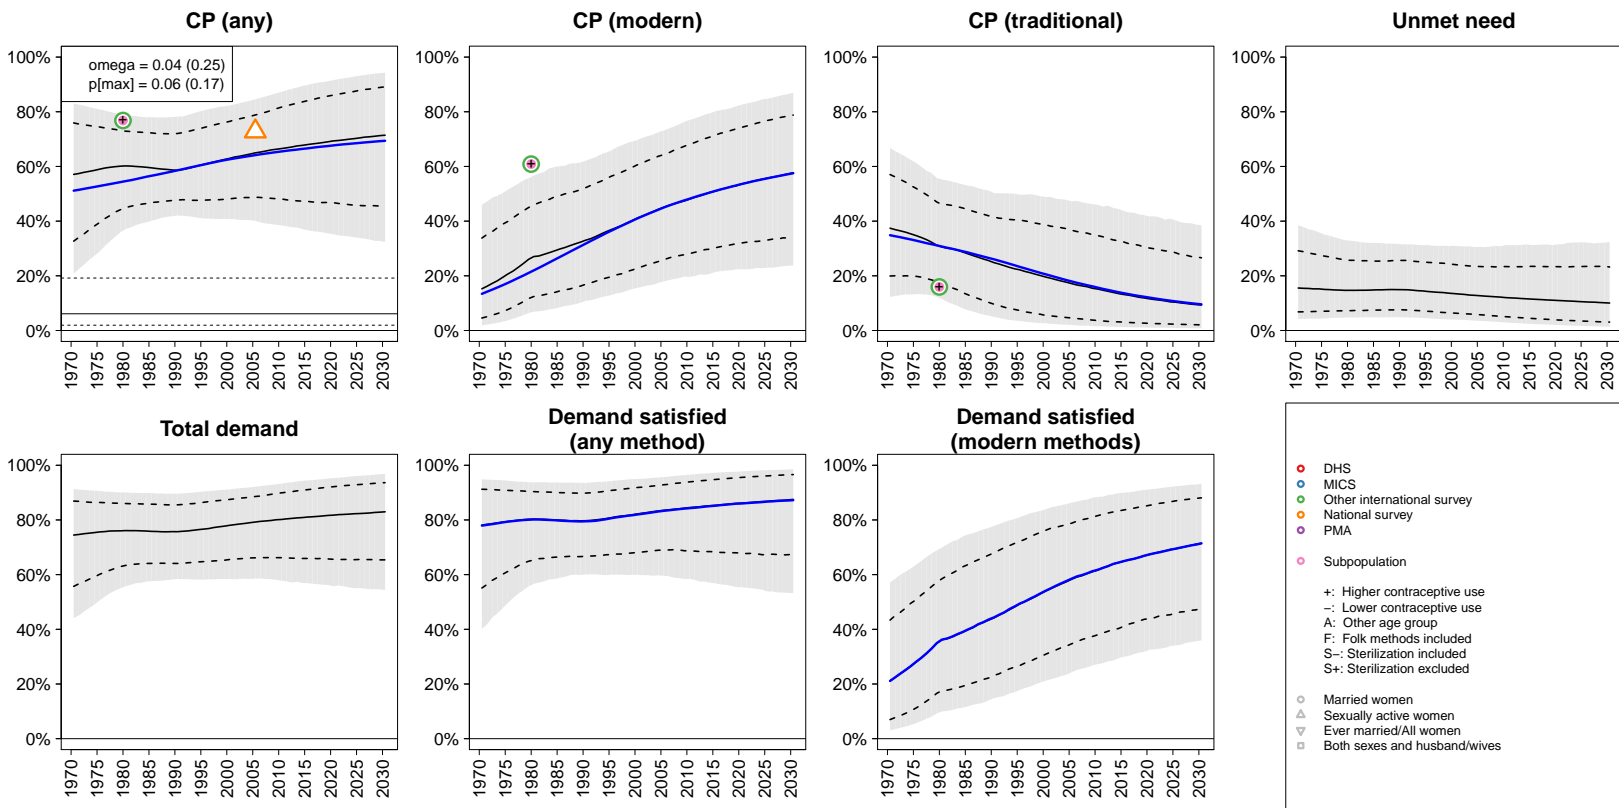

Qatar (Western Asia) --- Married / In-Union

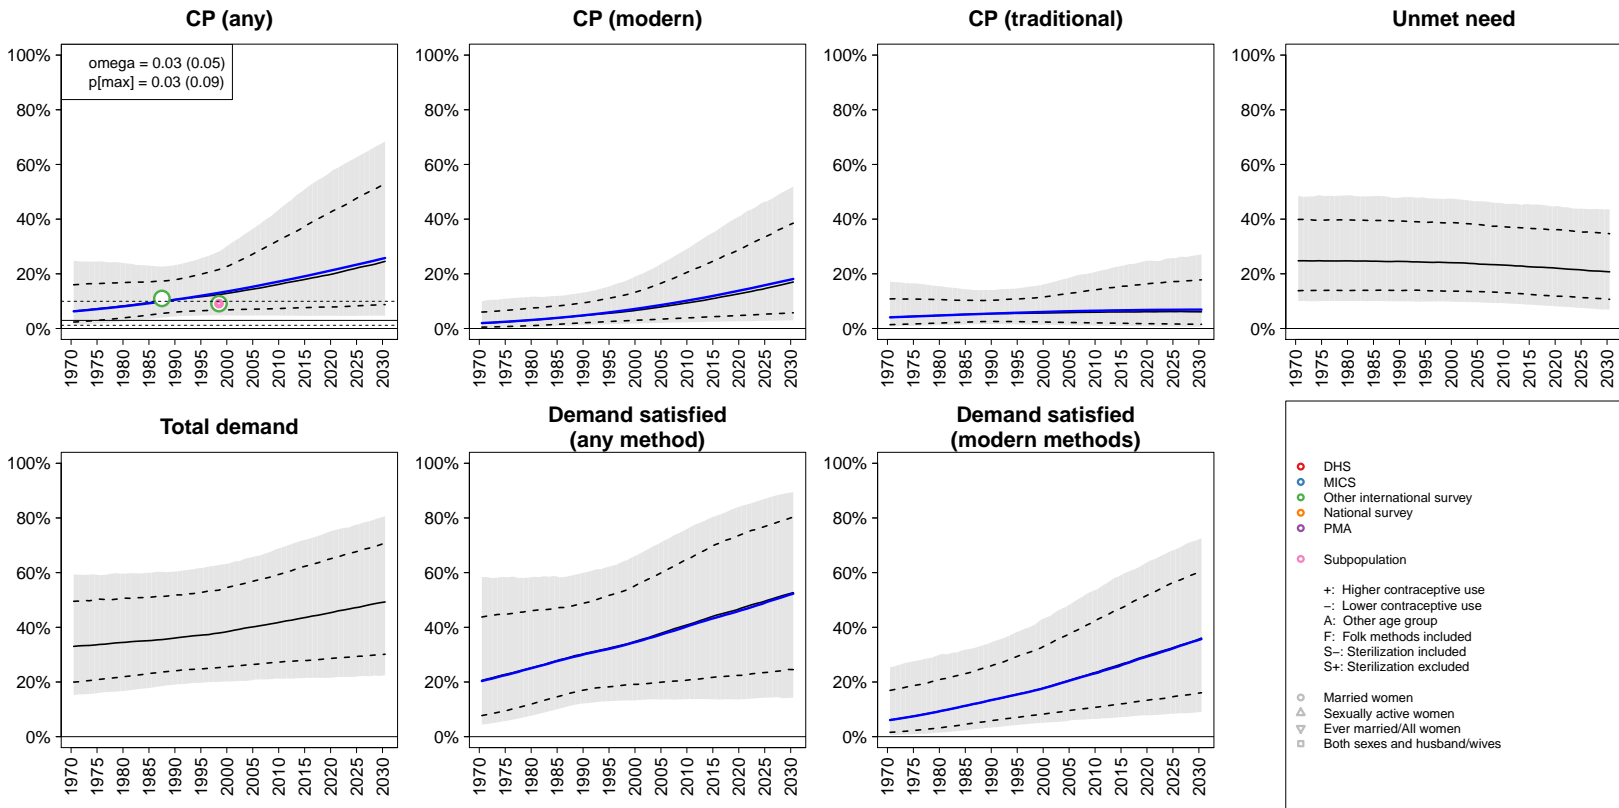

Republic of Korea (Eastern Asia) --- Married / In-Union

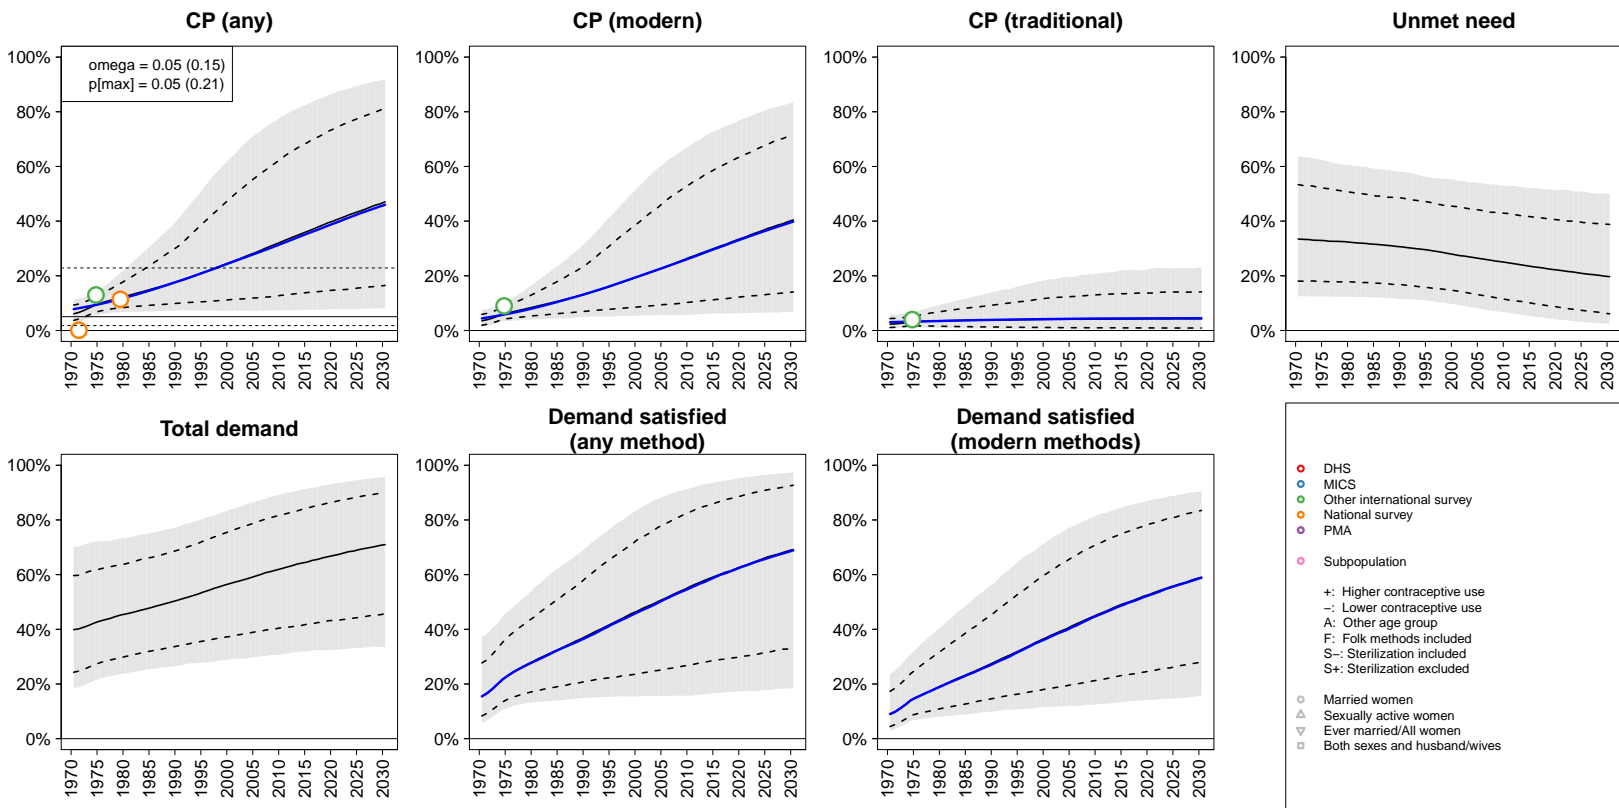

Republic of Moldova (Eastern Europe) --- Married / In-Union

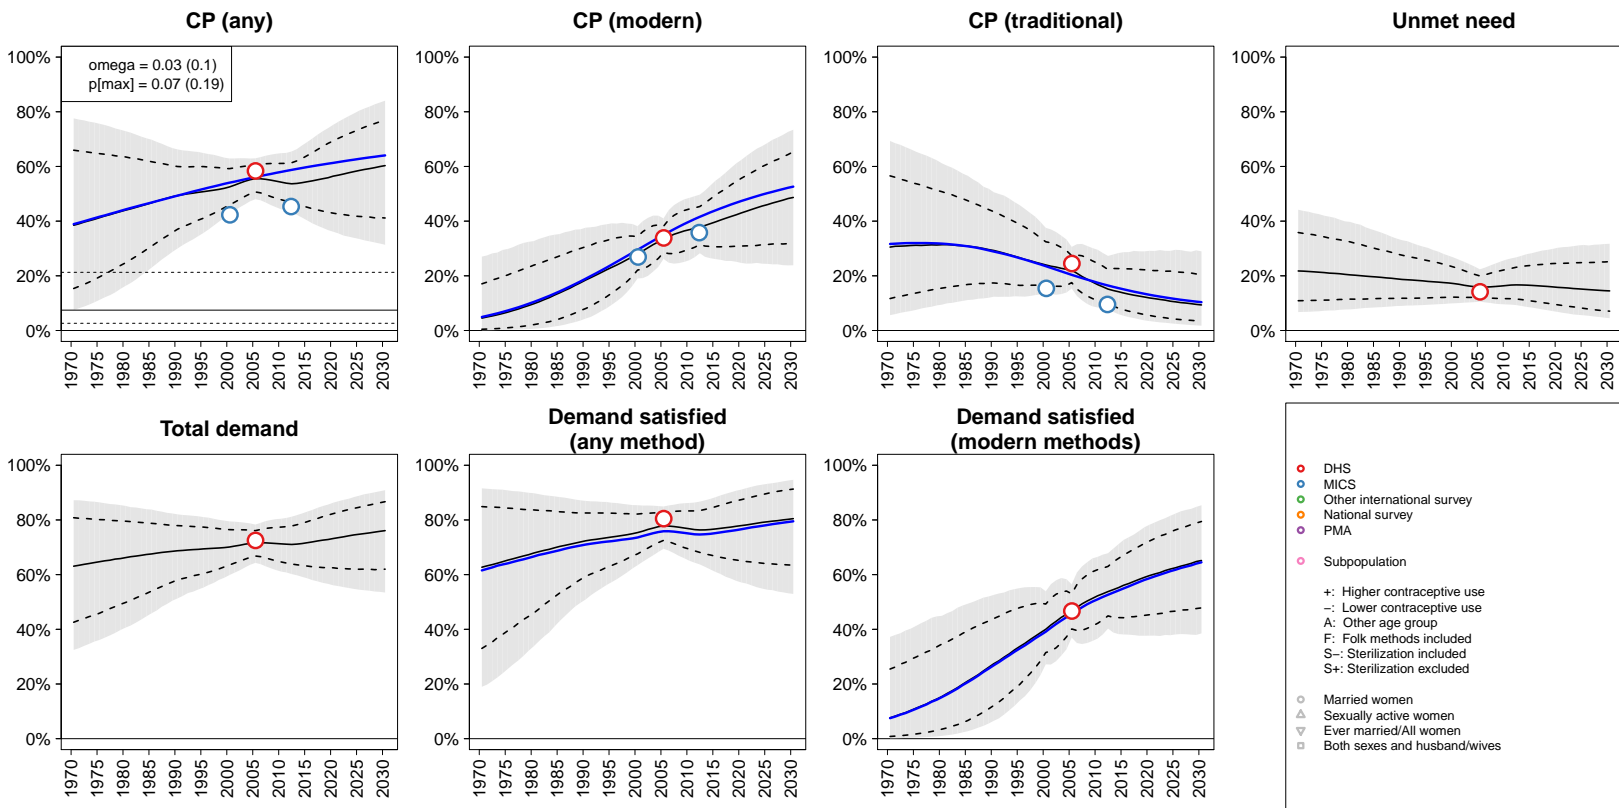

Rwanda (Eastern Africa) --- Married / In-Union

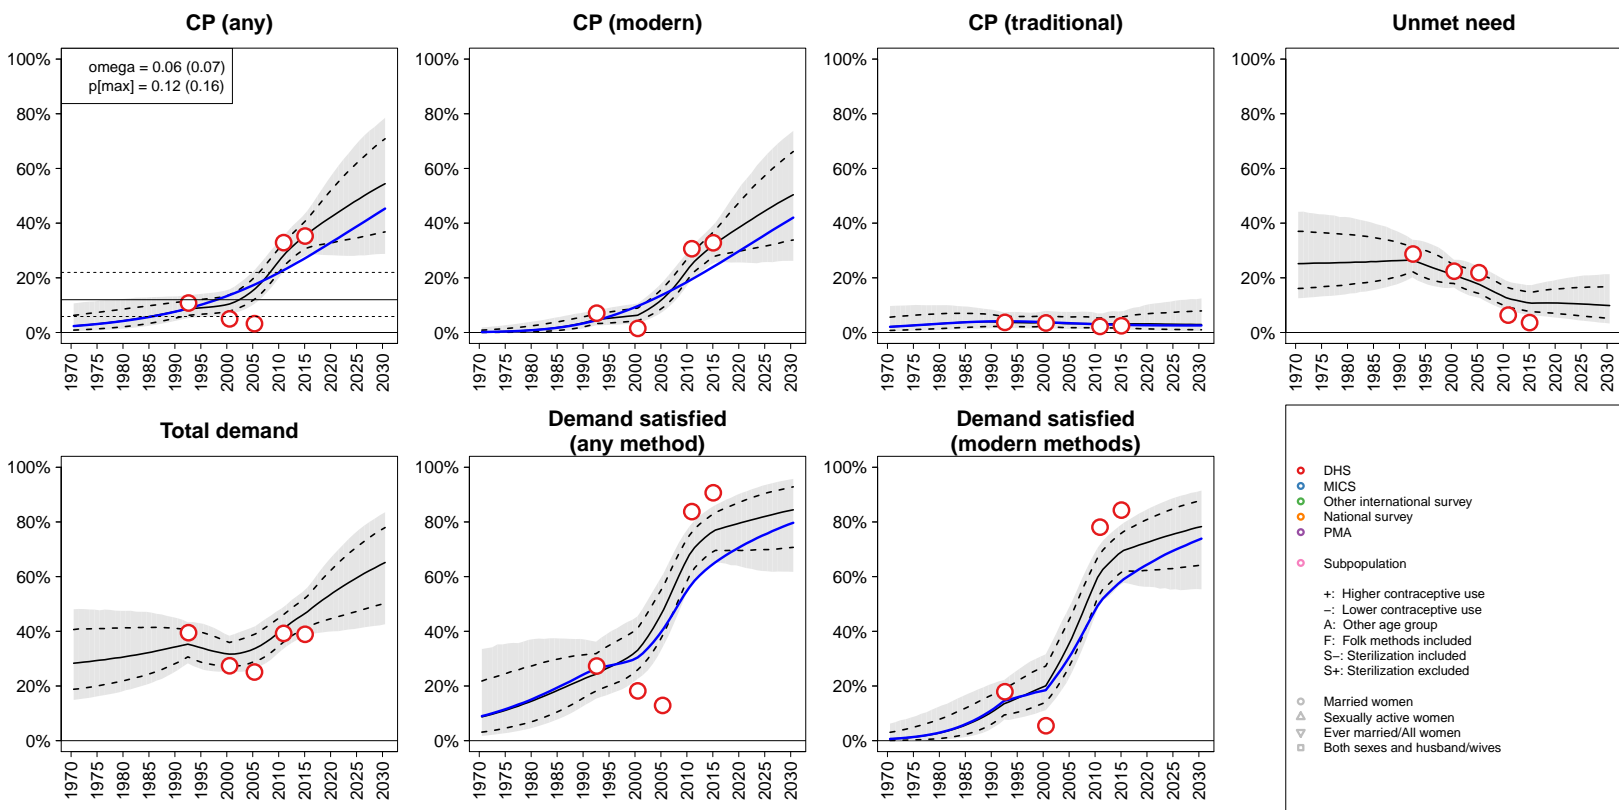

Samoa (Polynesia) --- Married / In-Union

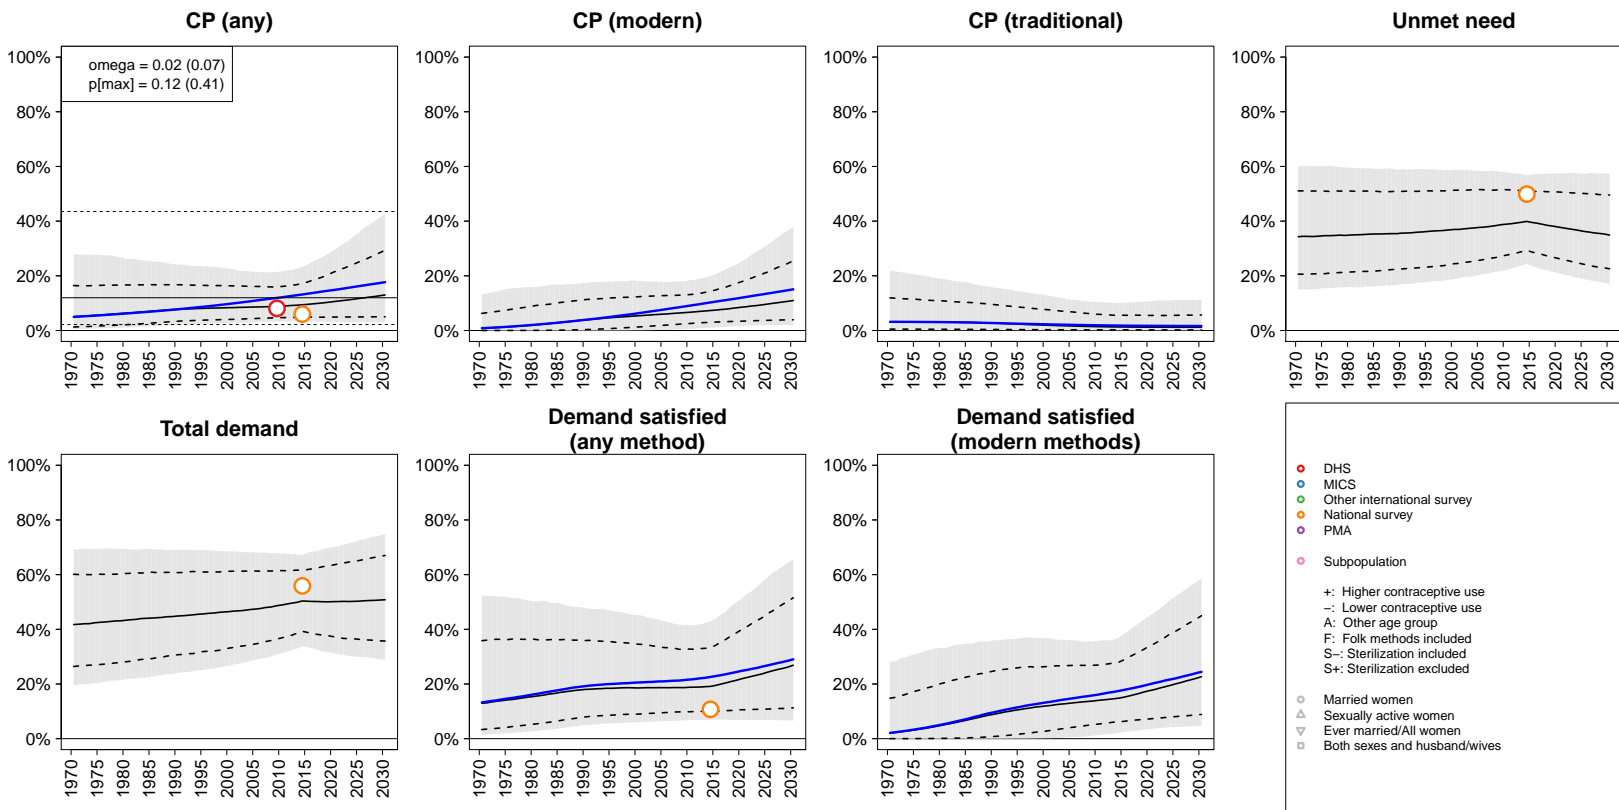

Sao Tome and Principe (Middle Africa) --- Married / In-Union

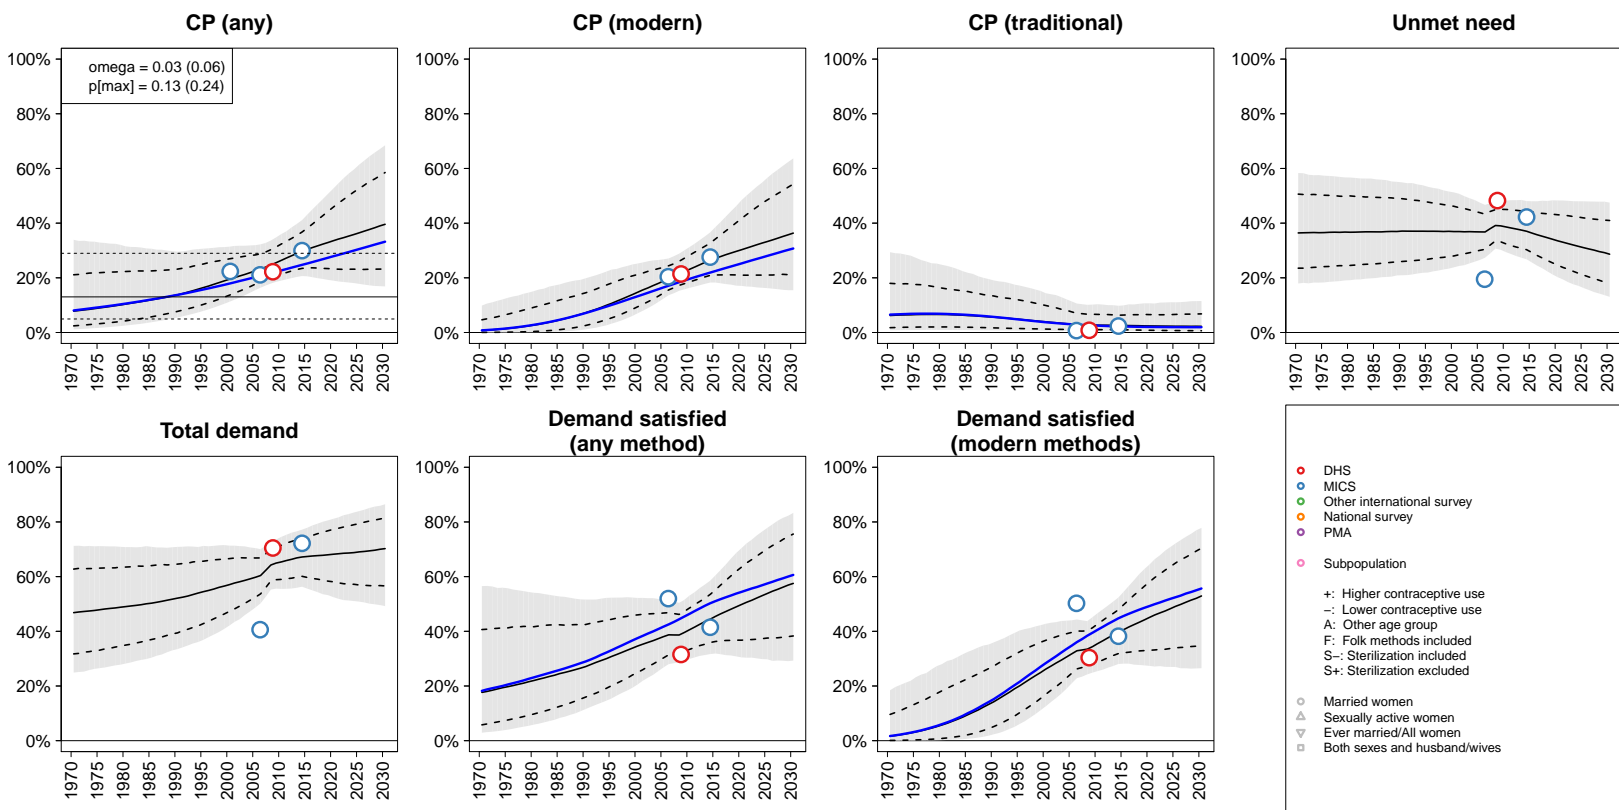

Saudi Arabia (Western Asia) --- Married / In-Union

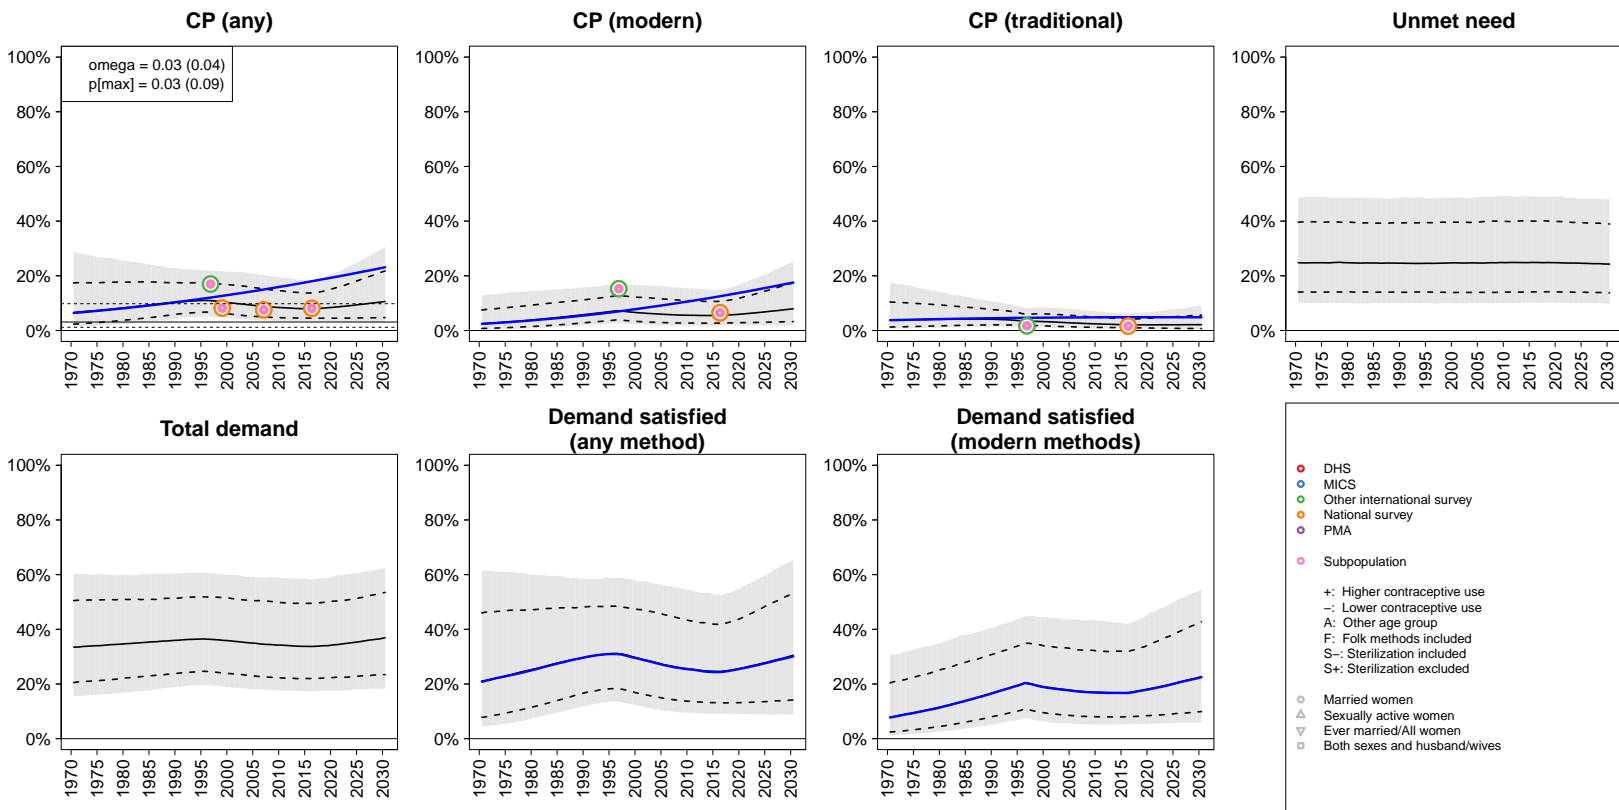



Senegal (Western Africa) --- Married / In-Union

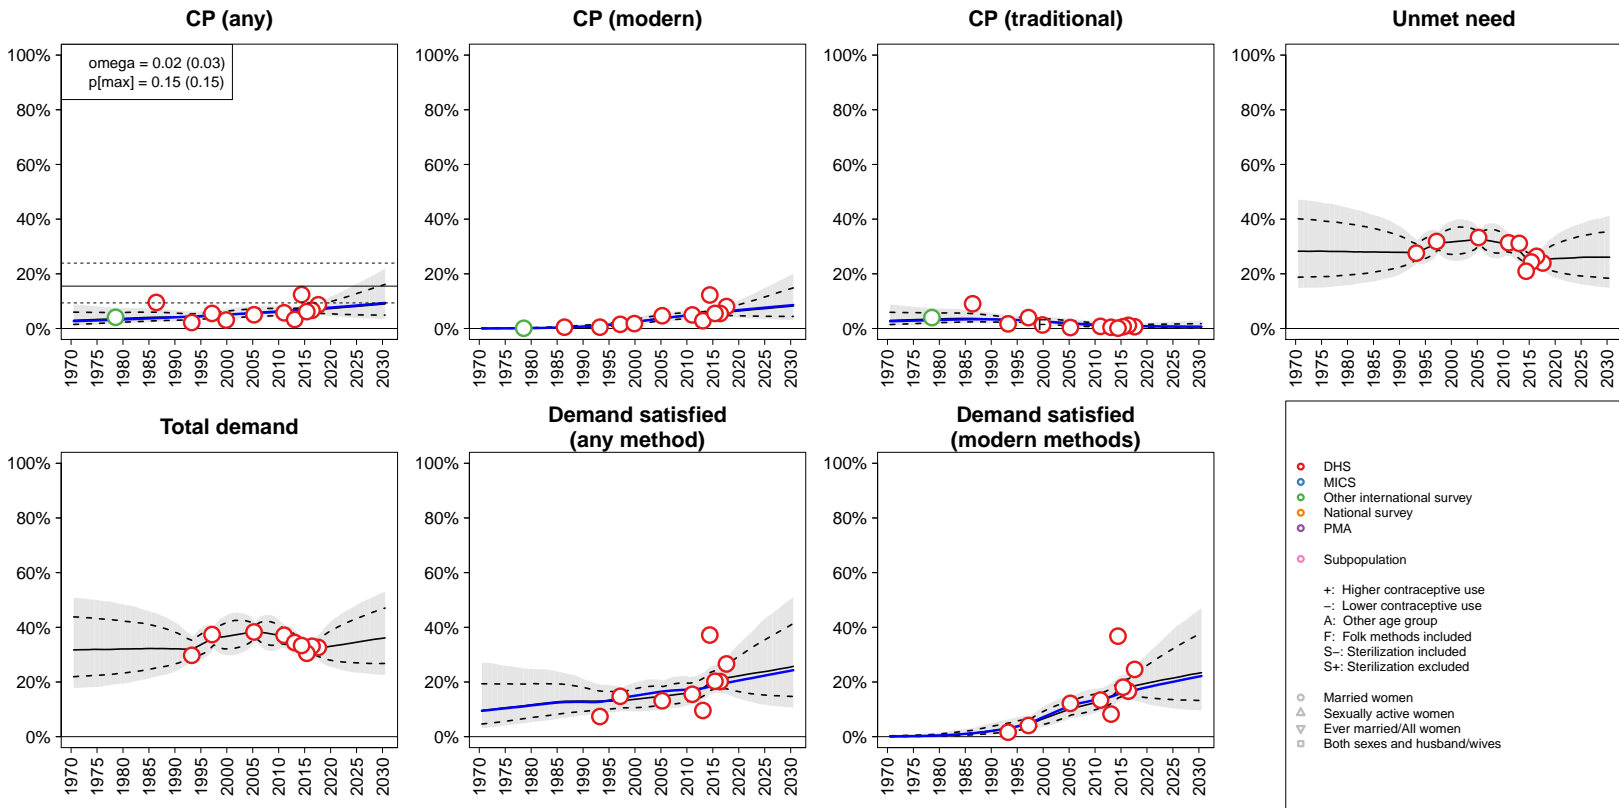

Sierra Leone (Western Africa) — Married / In-Union

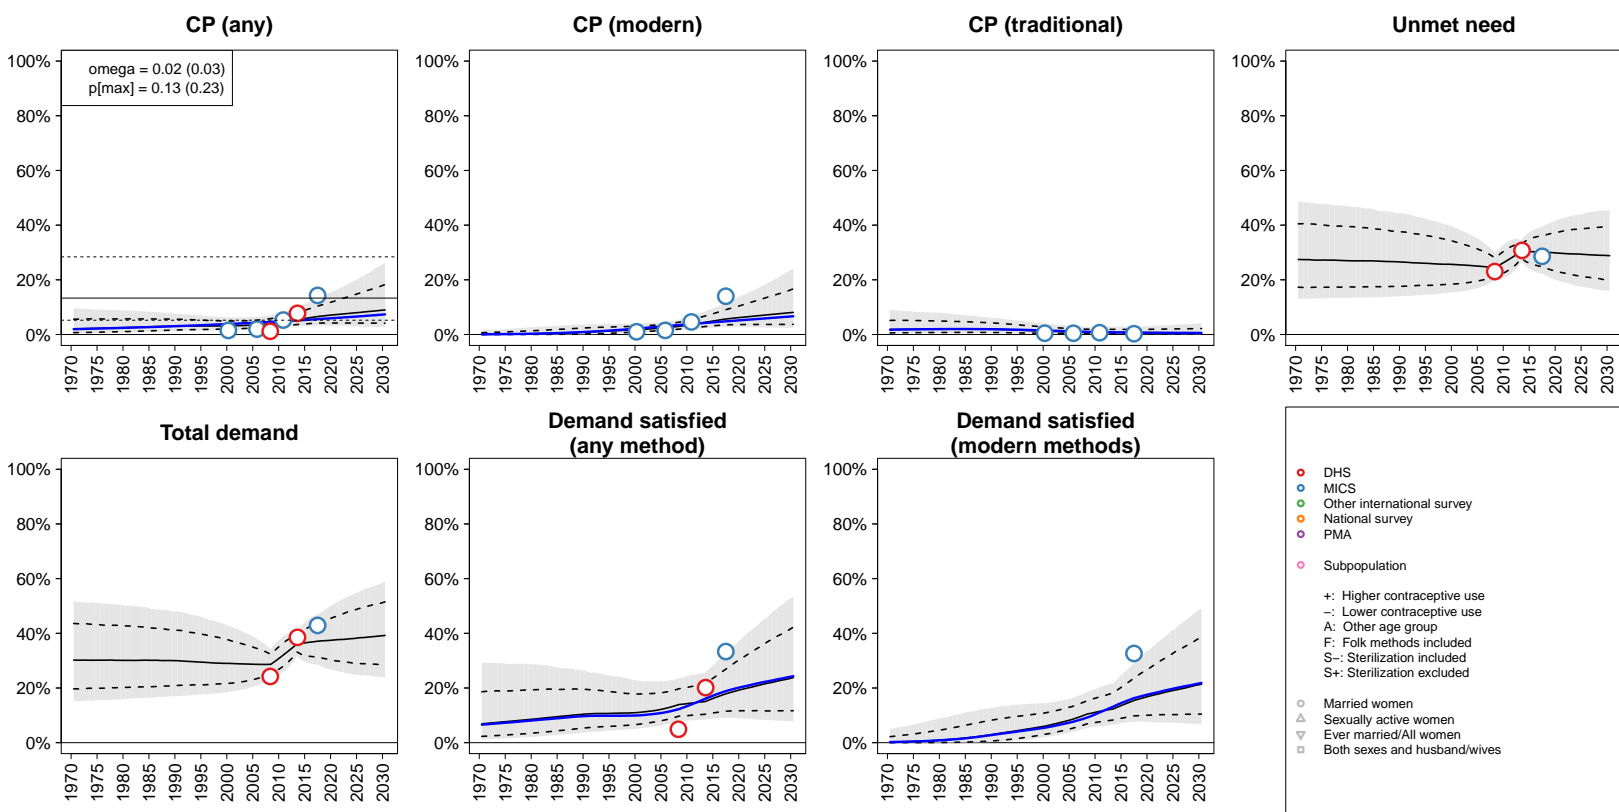

Solomon Islands (Melanesia) --- Married / In-Union

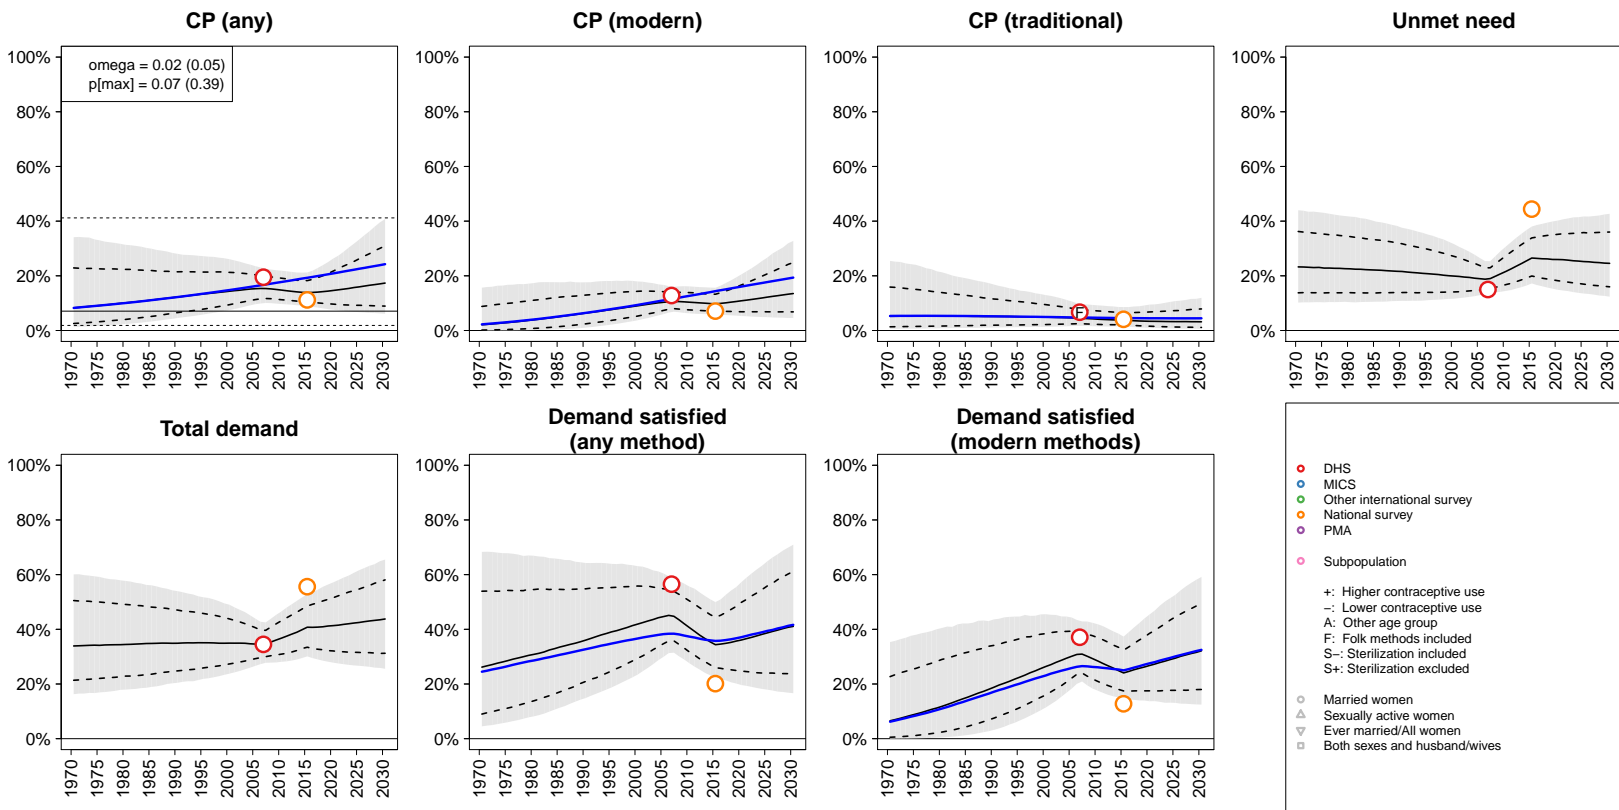

Somalia (Eastern Africa) — Married / In-Union

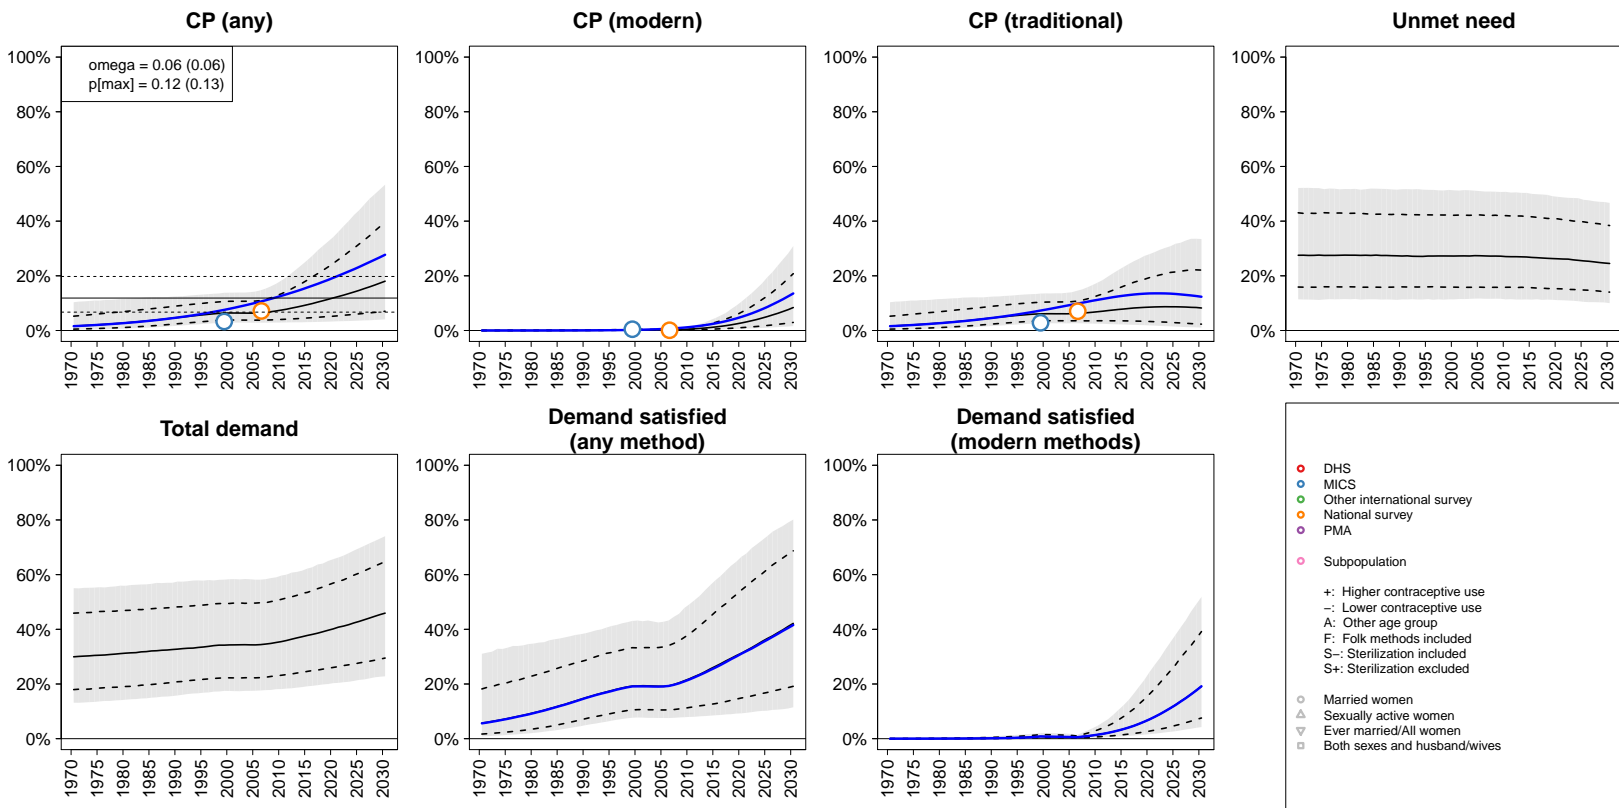

South Africa (Southern Africa) --- Married / In-Union

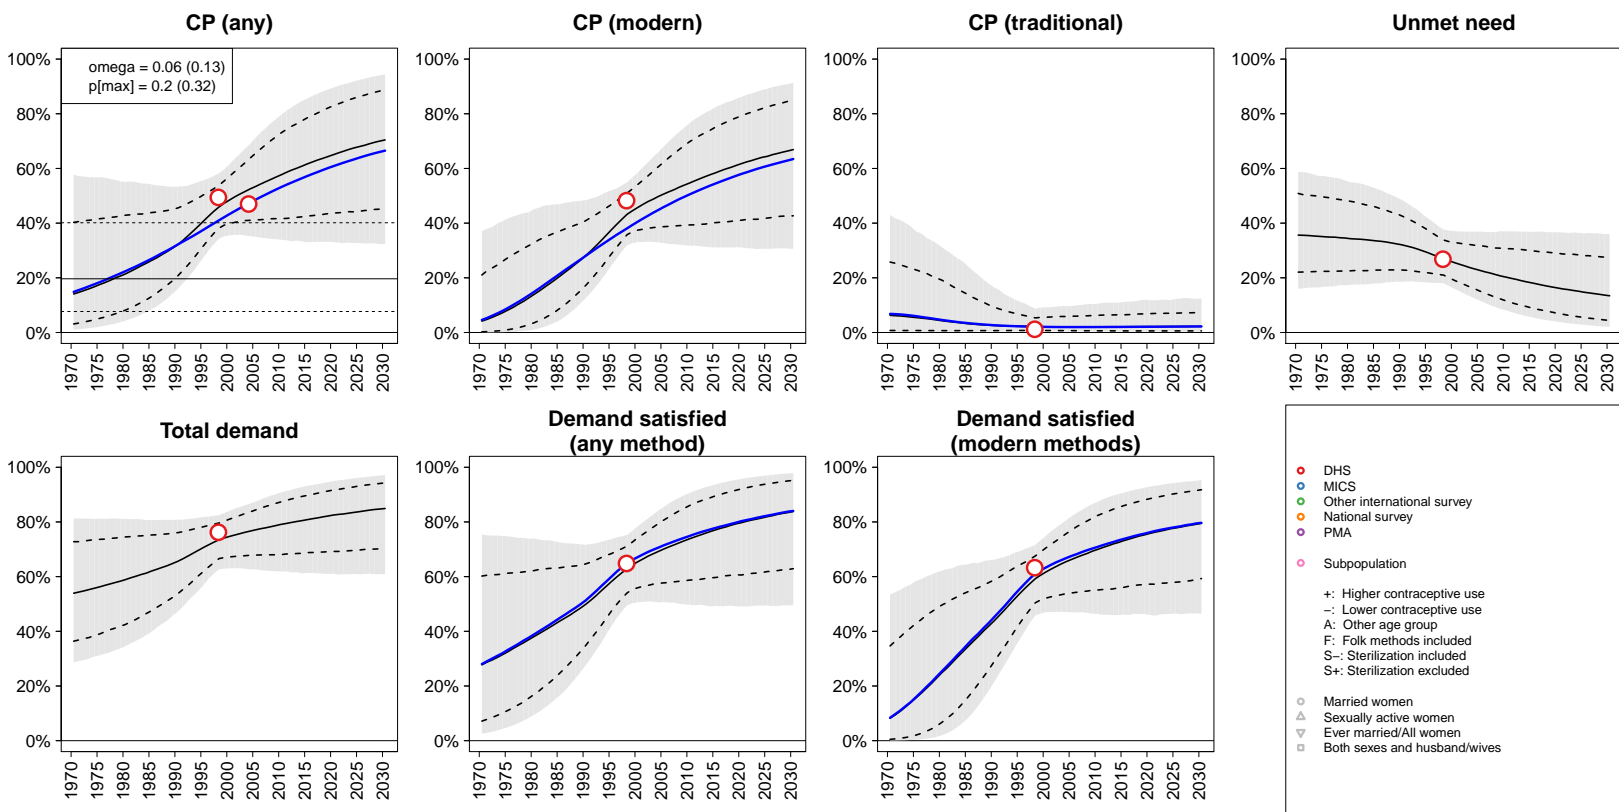

Spain (Southern Europe) --- Married / In-Union

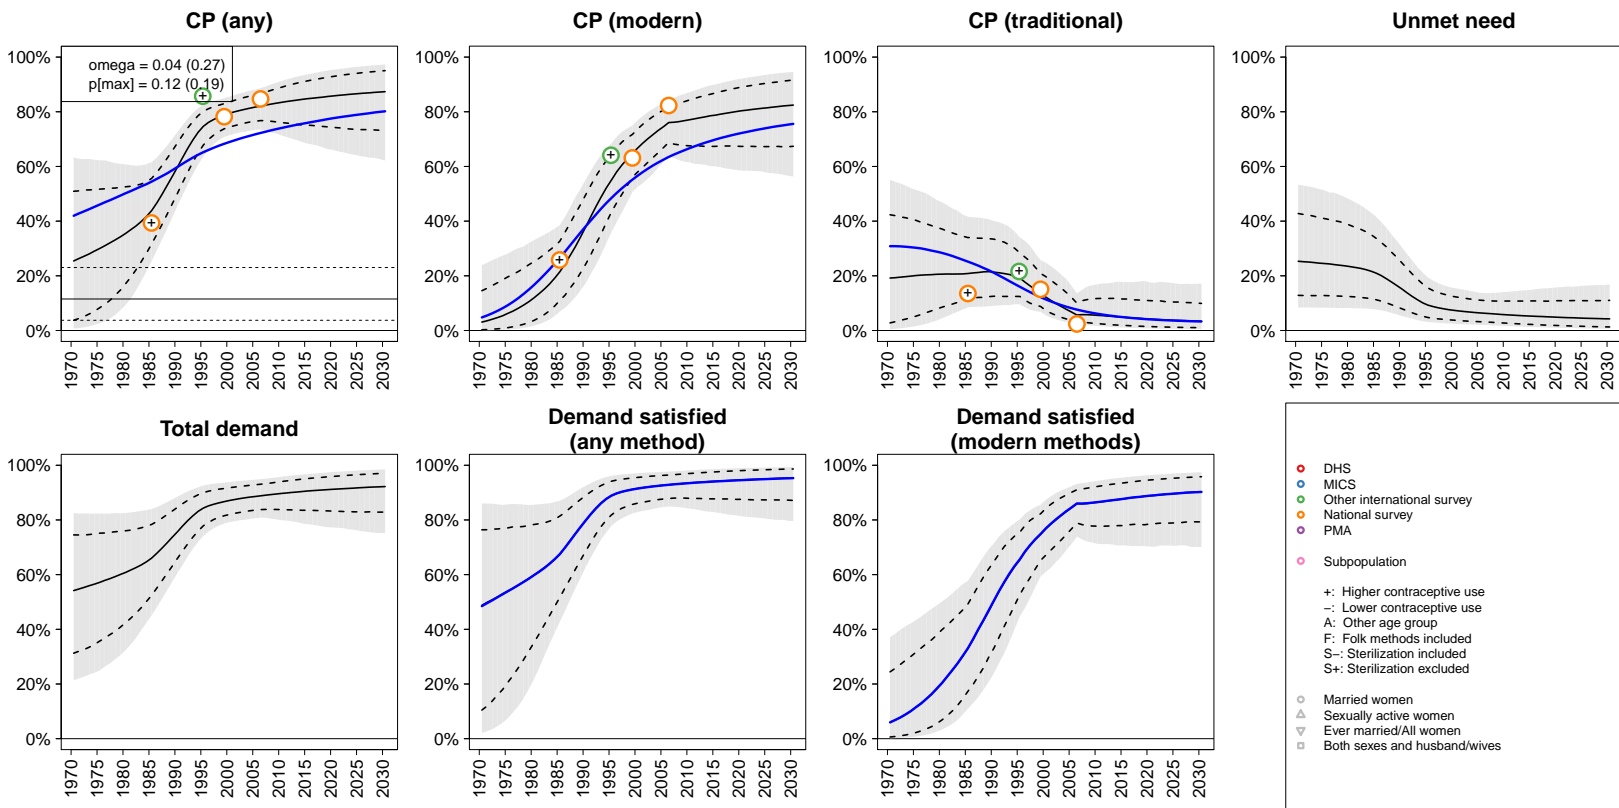

Sri Lanka (Southern Asia) --- Married / In-Union

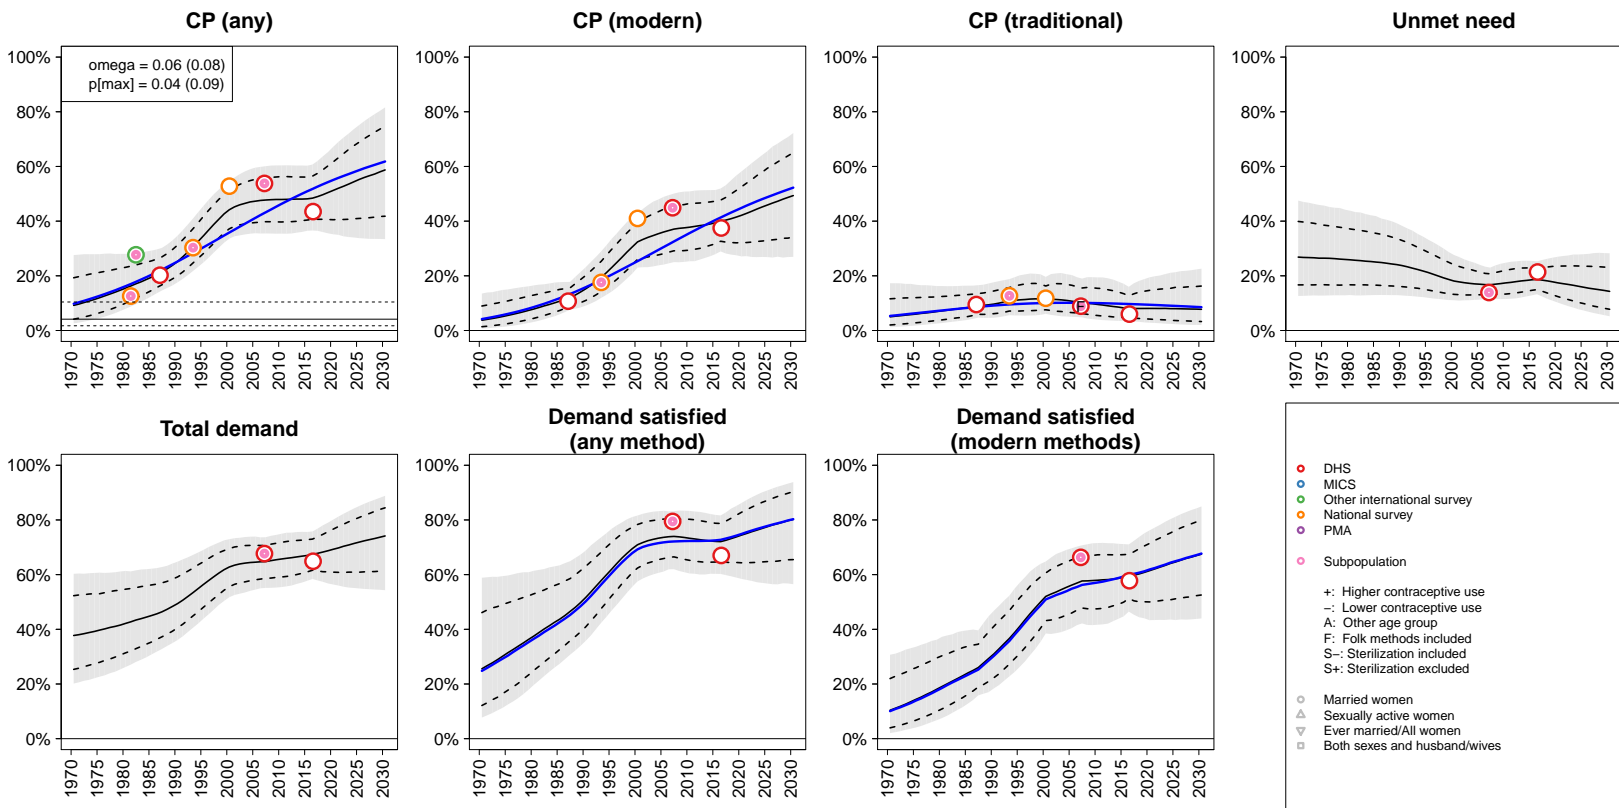

St. Lucia (Caribbean) --- Married / In-Union

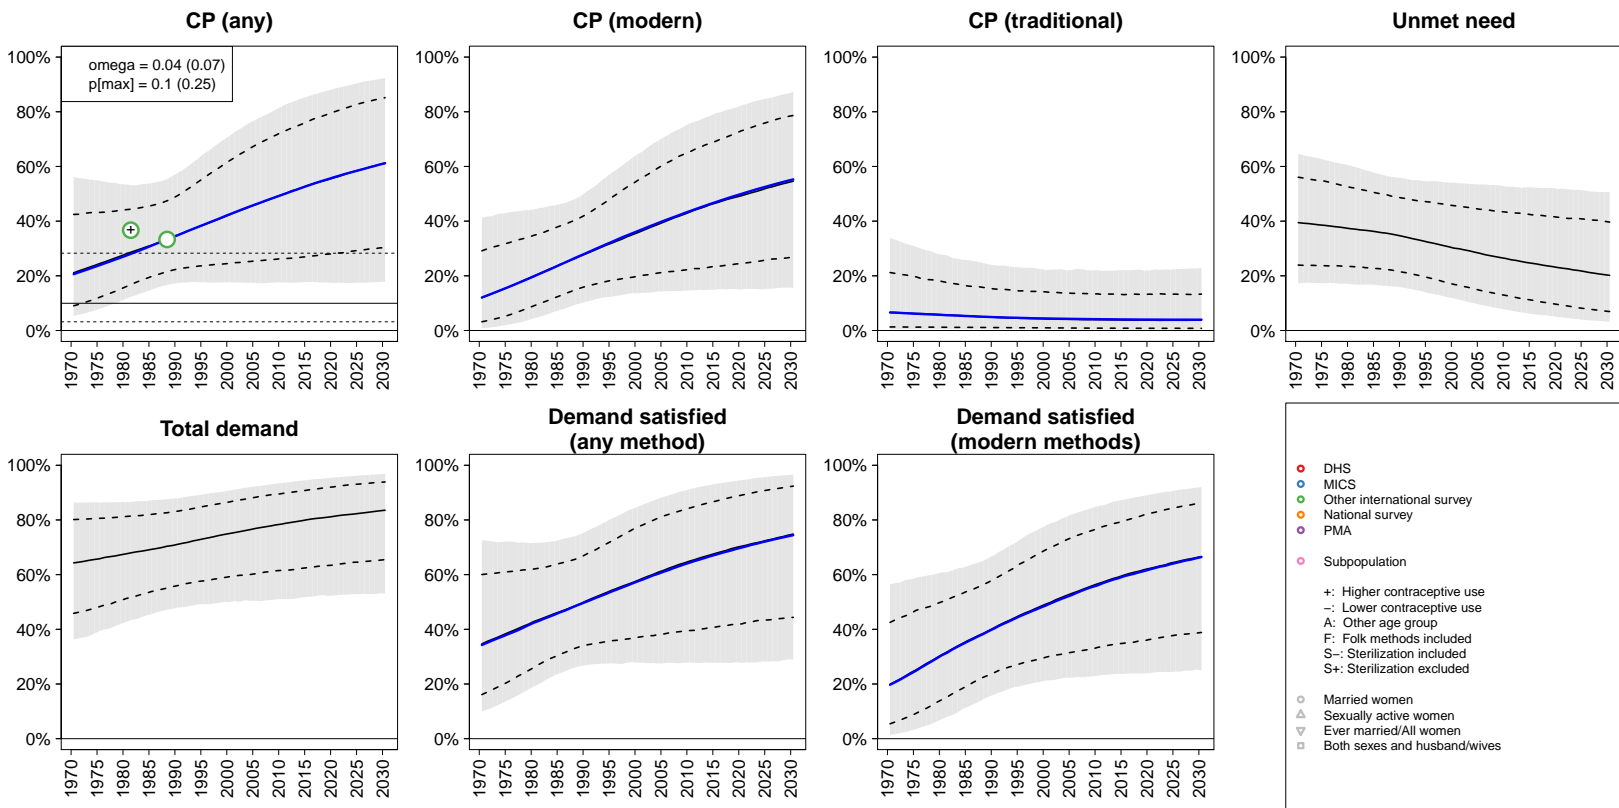



St. Vincent and the Grenadines (Caribbean) --- Married / In-Union

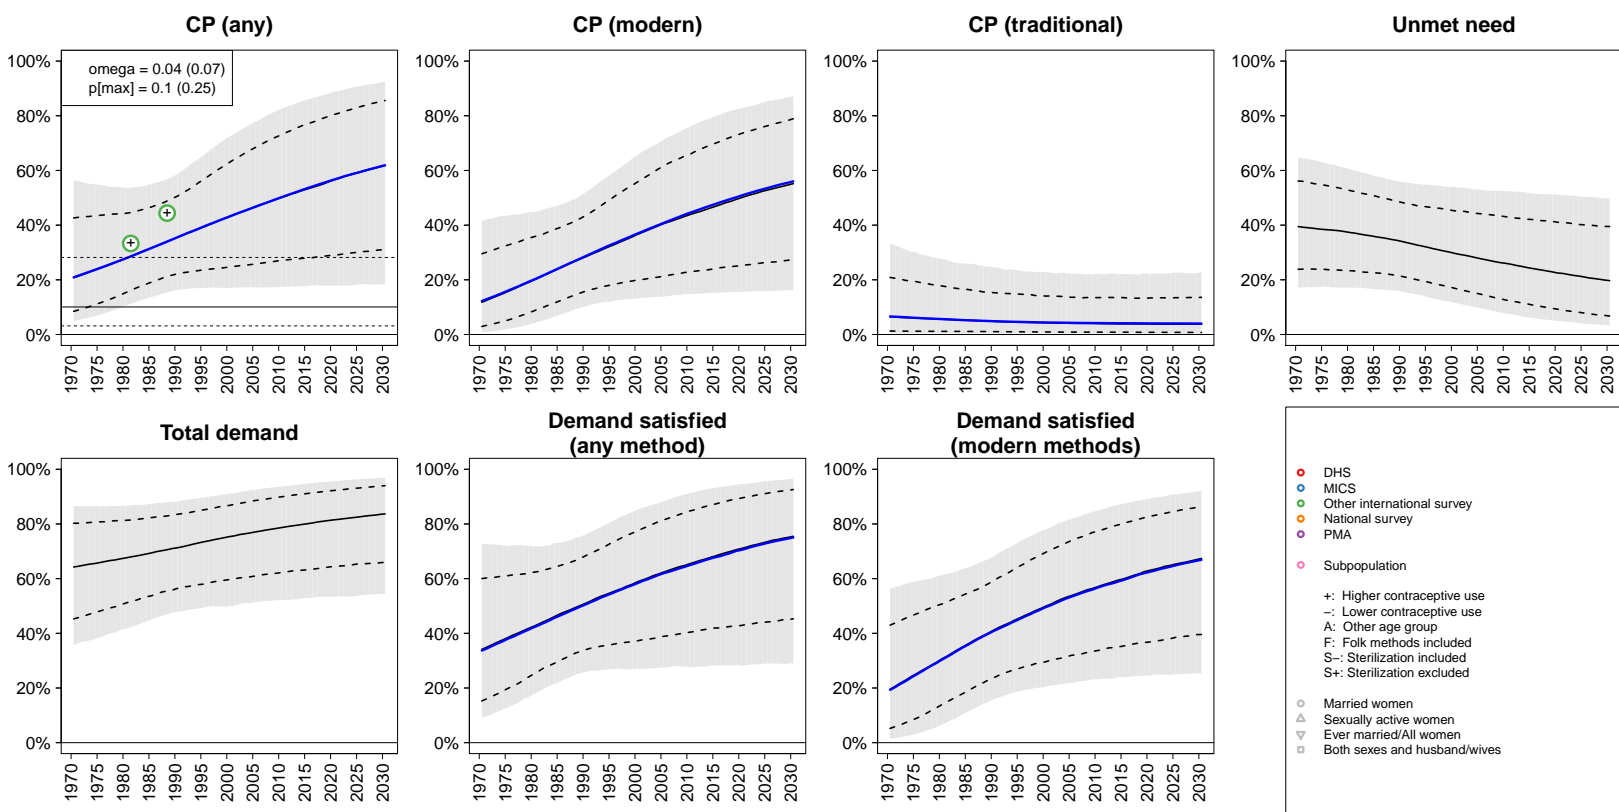

State of Palestine (Western Asia) --- Married / In-Union

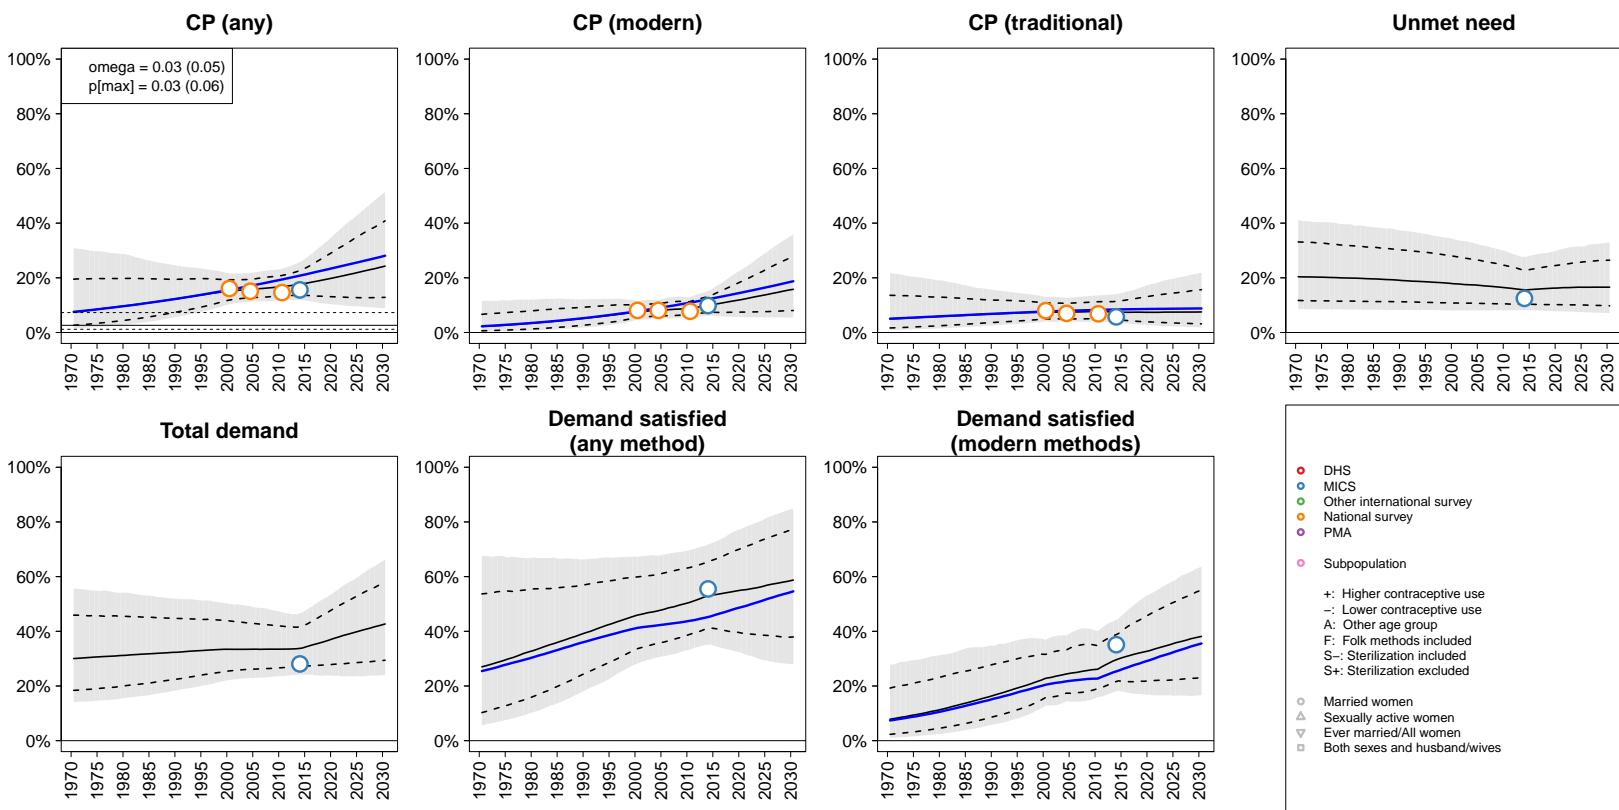

Sudan (Northern Africa) --- Married / In-Union

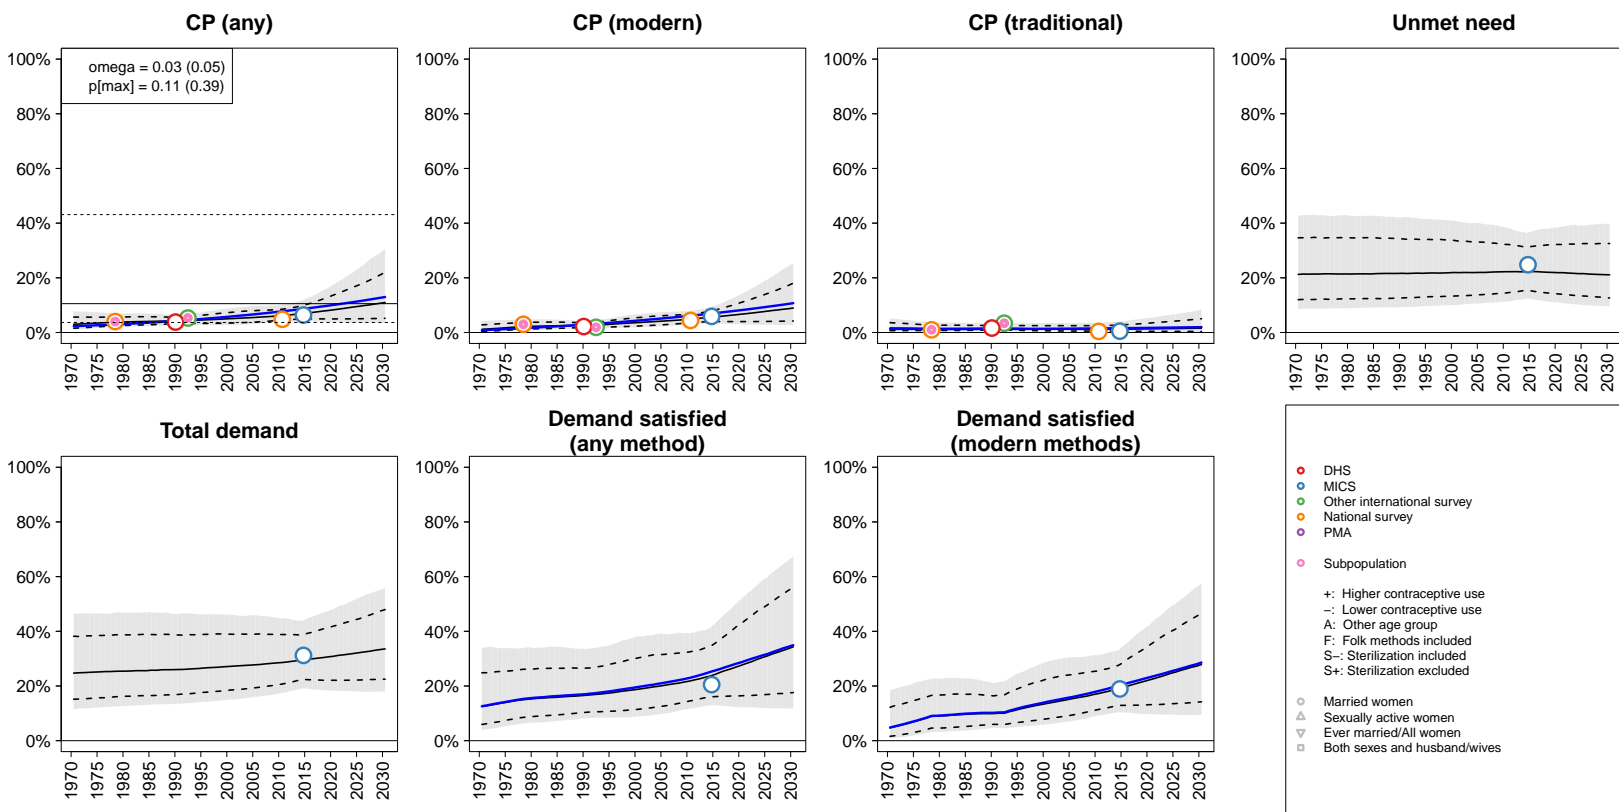

Suriname (South America) --- Married / In-Union

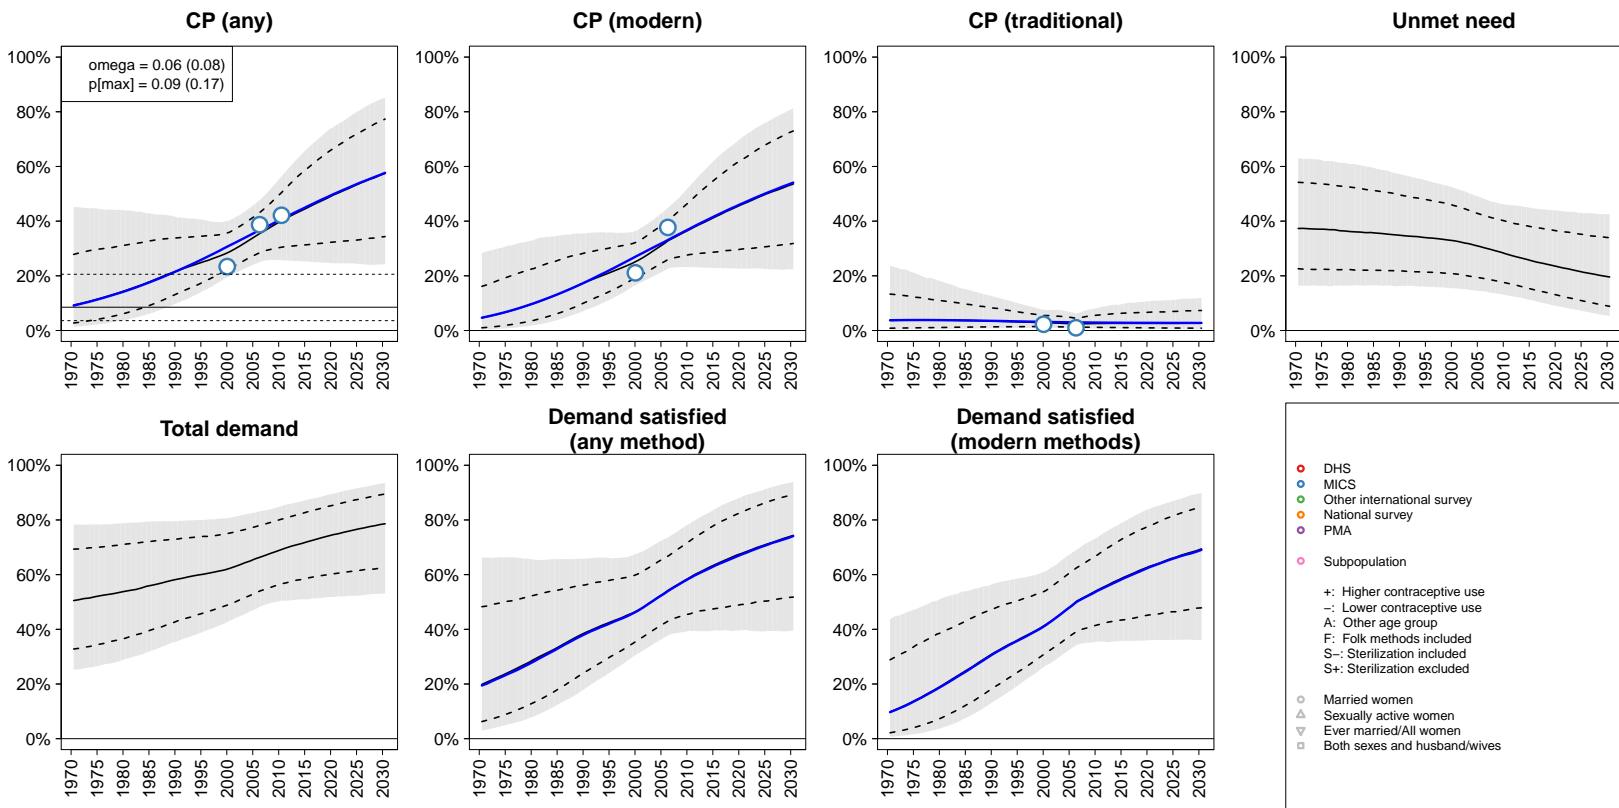

Syrian Arab Republic (Western Asia) --- Married / In-Union

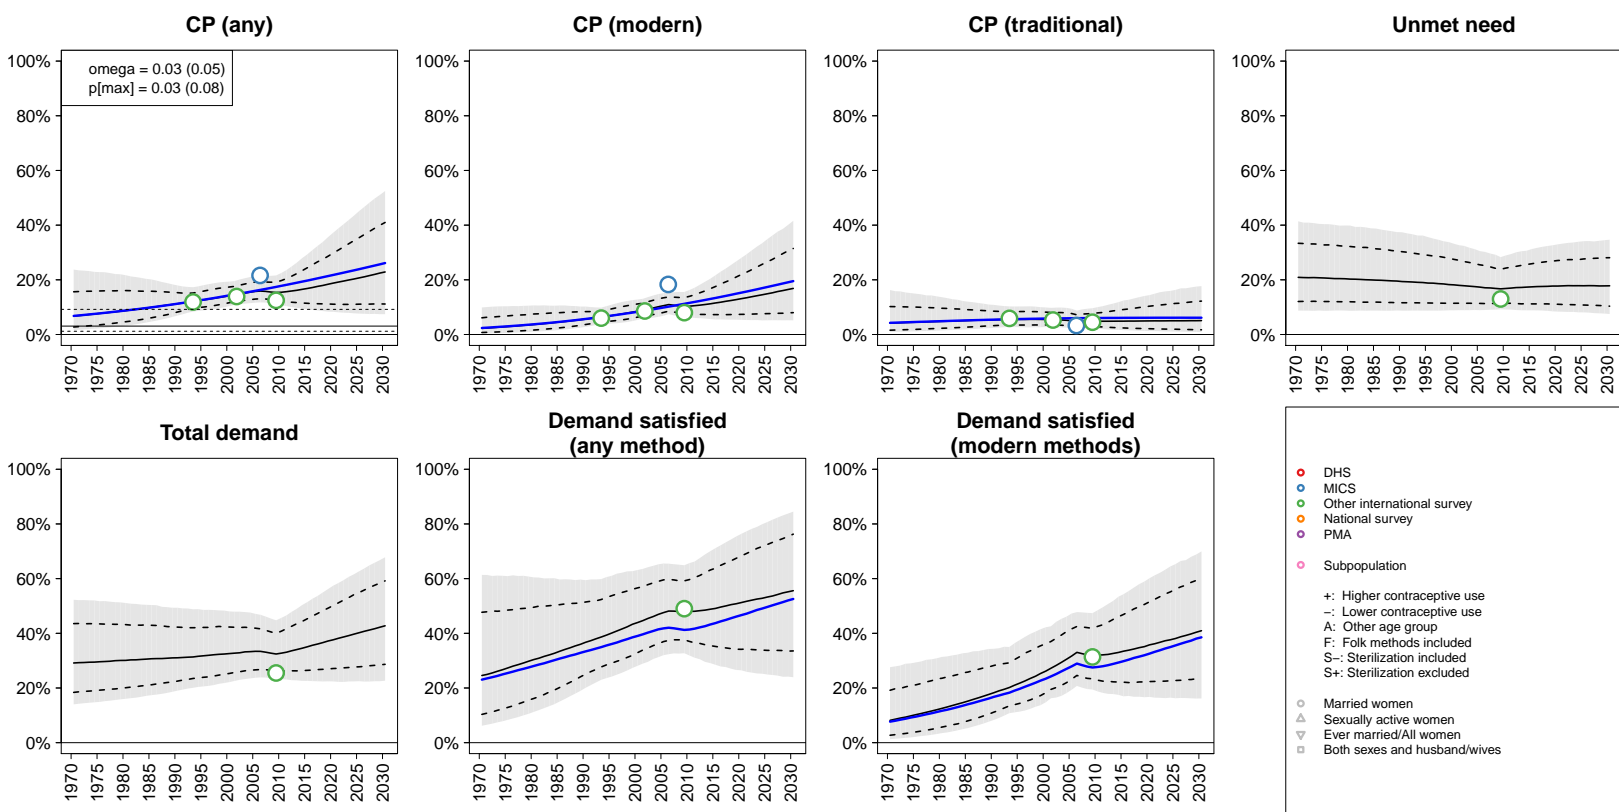

Tajikistan (Central Asia) --- Married / In-Union

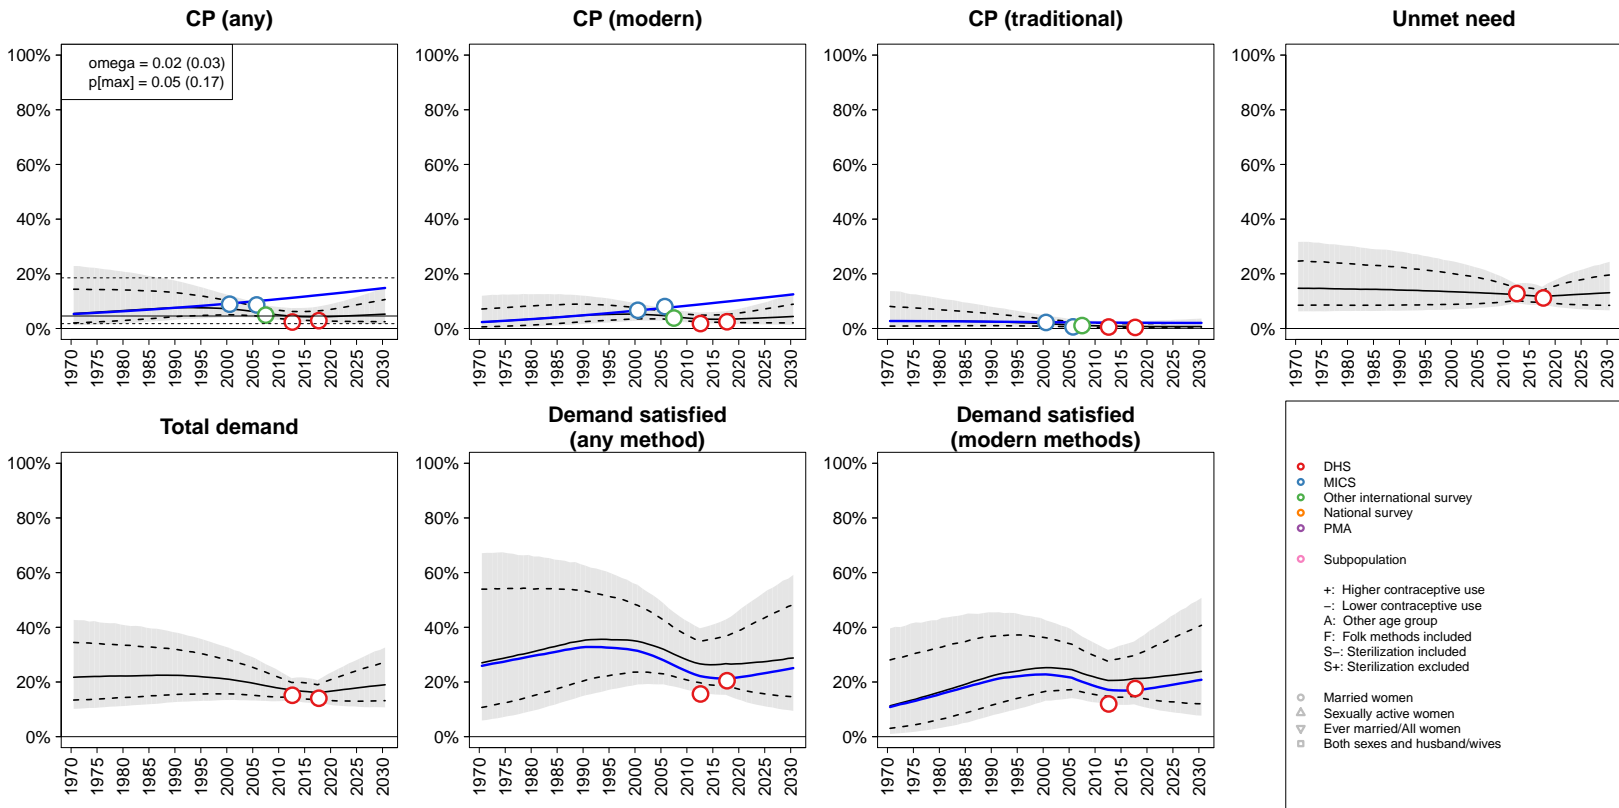

Thailand (South-eastern Asia) --- Married / In-Union

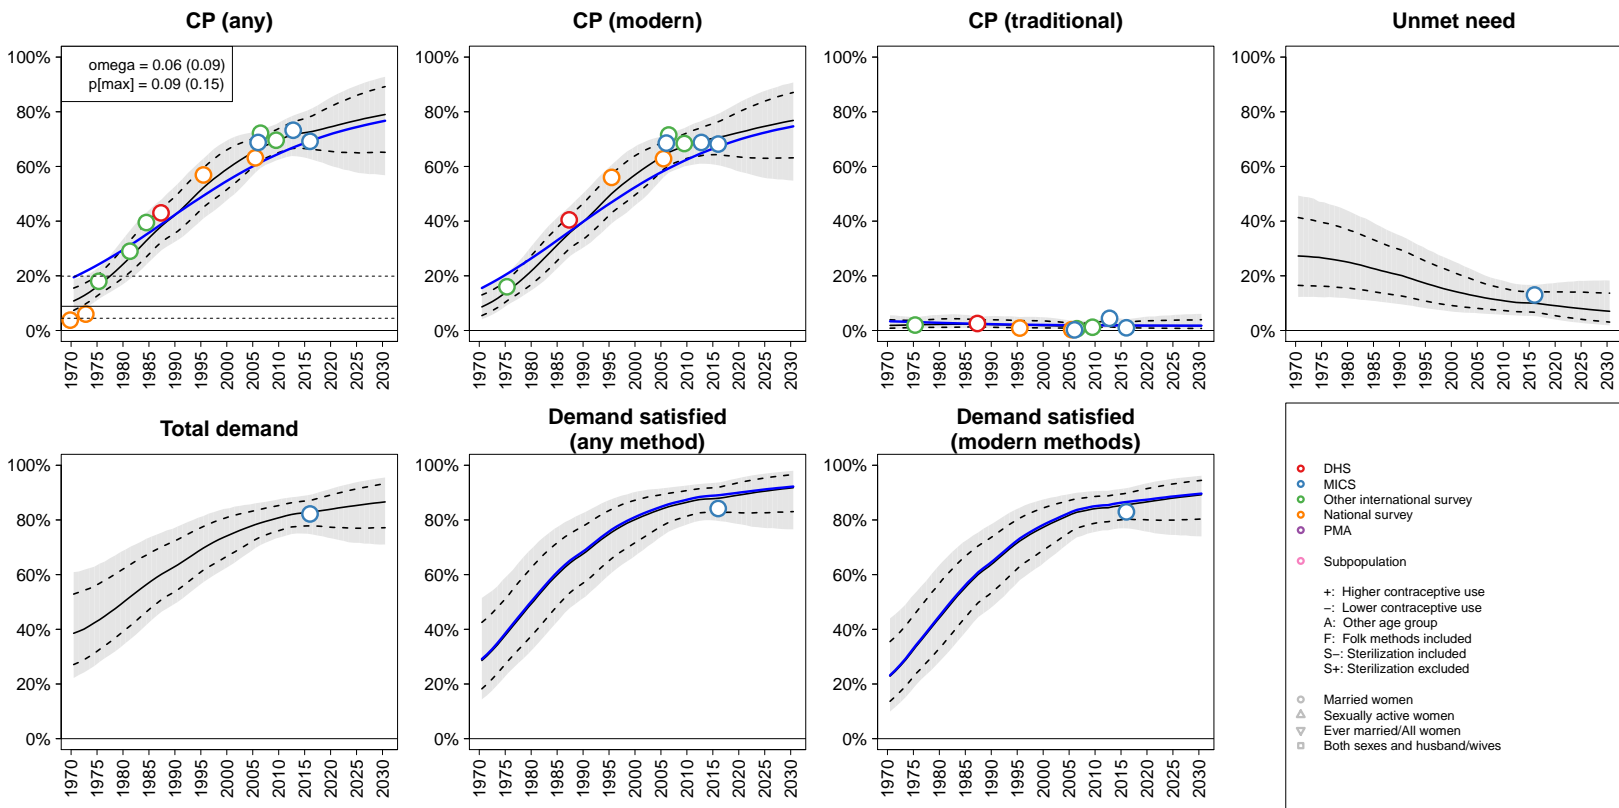

Togo (Western Africa) — Married / In-Union

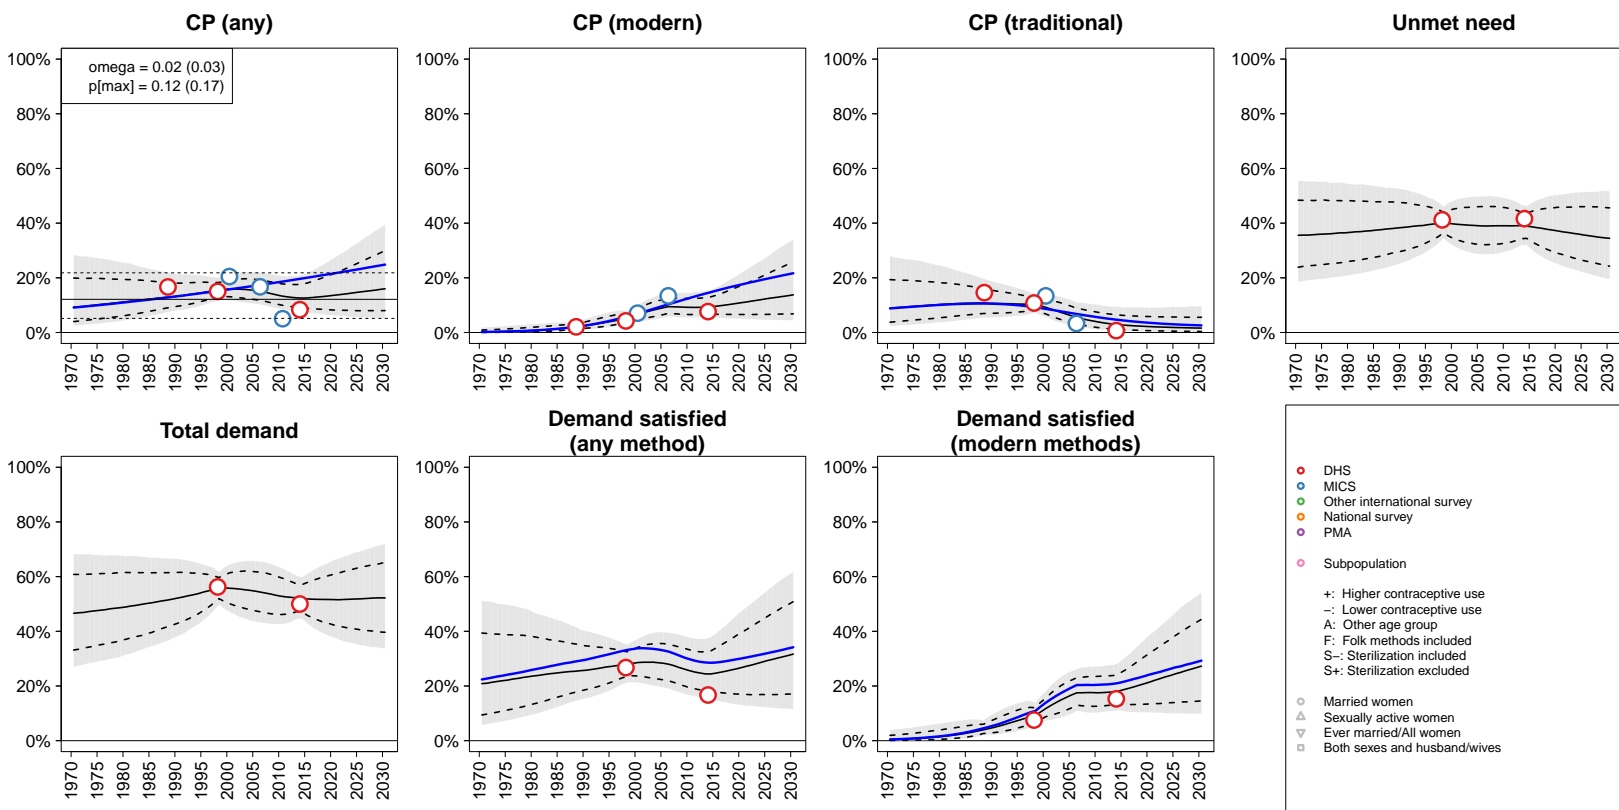



Trinidad and Tobago (Caribbean) --- Married / In-Union

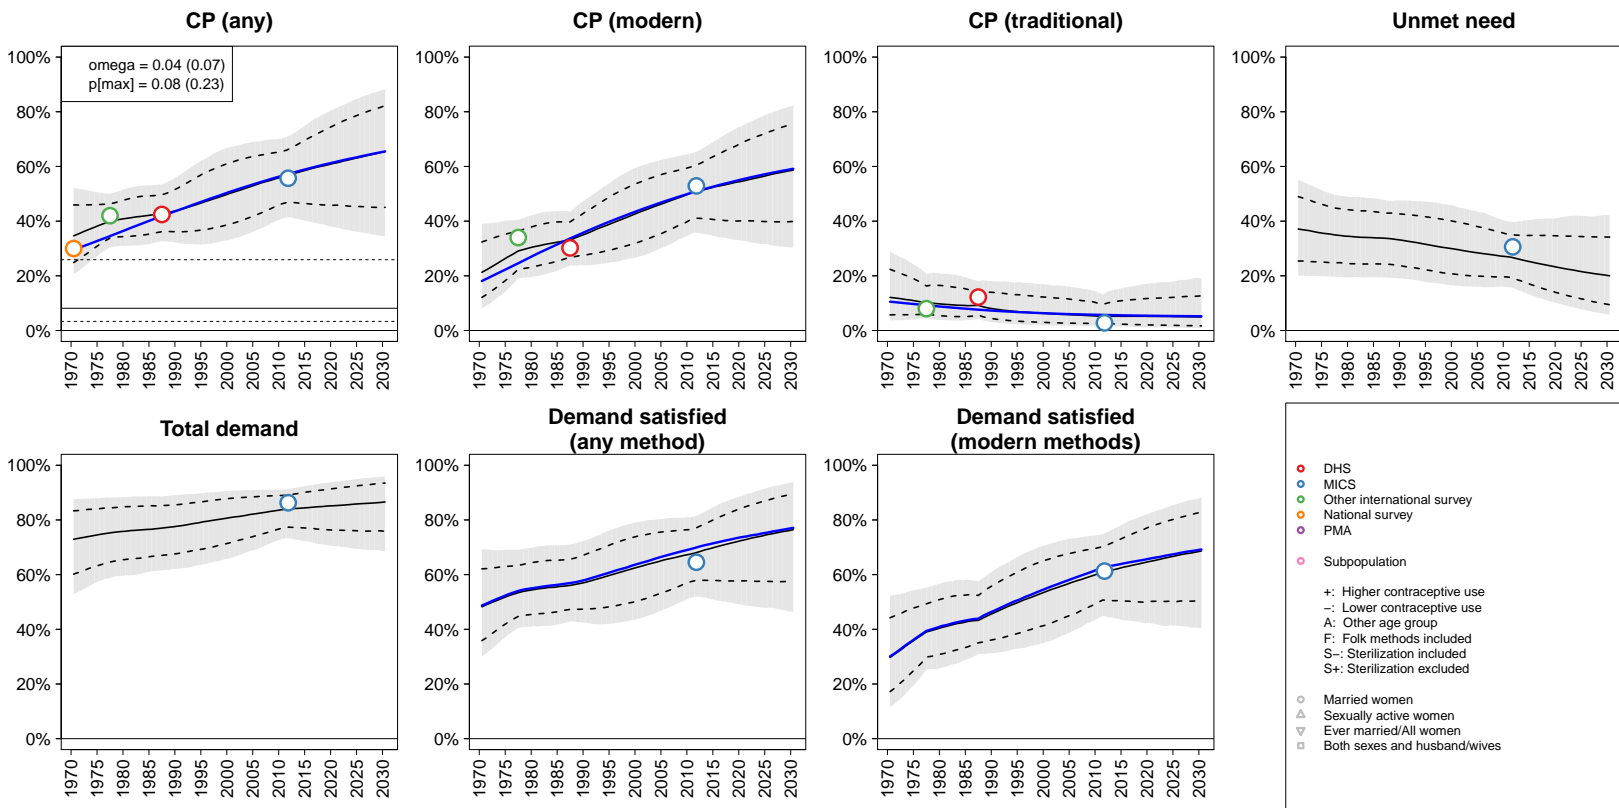

Tunisia (Northern Africa) — Married / In-Union

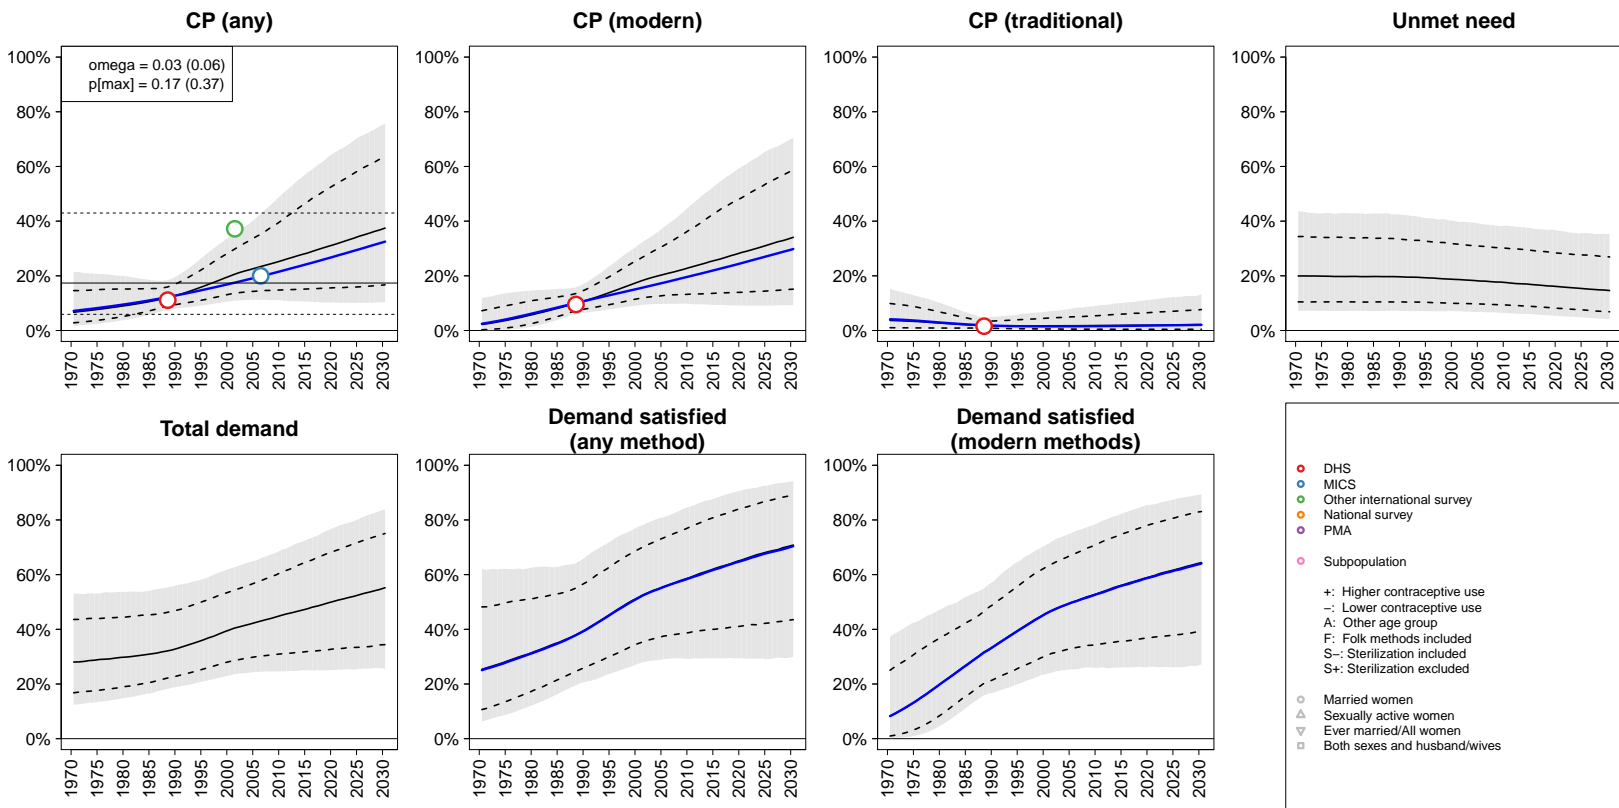

Turkey (Western Asia) --- Married / In-Union

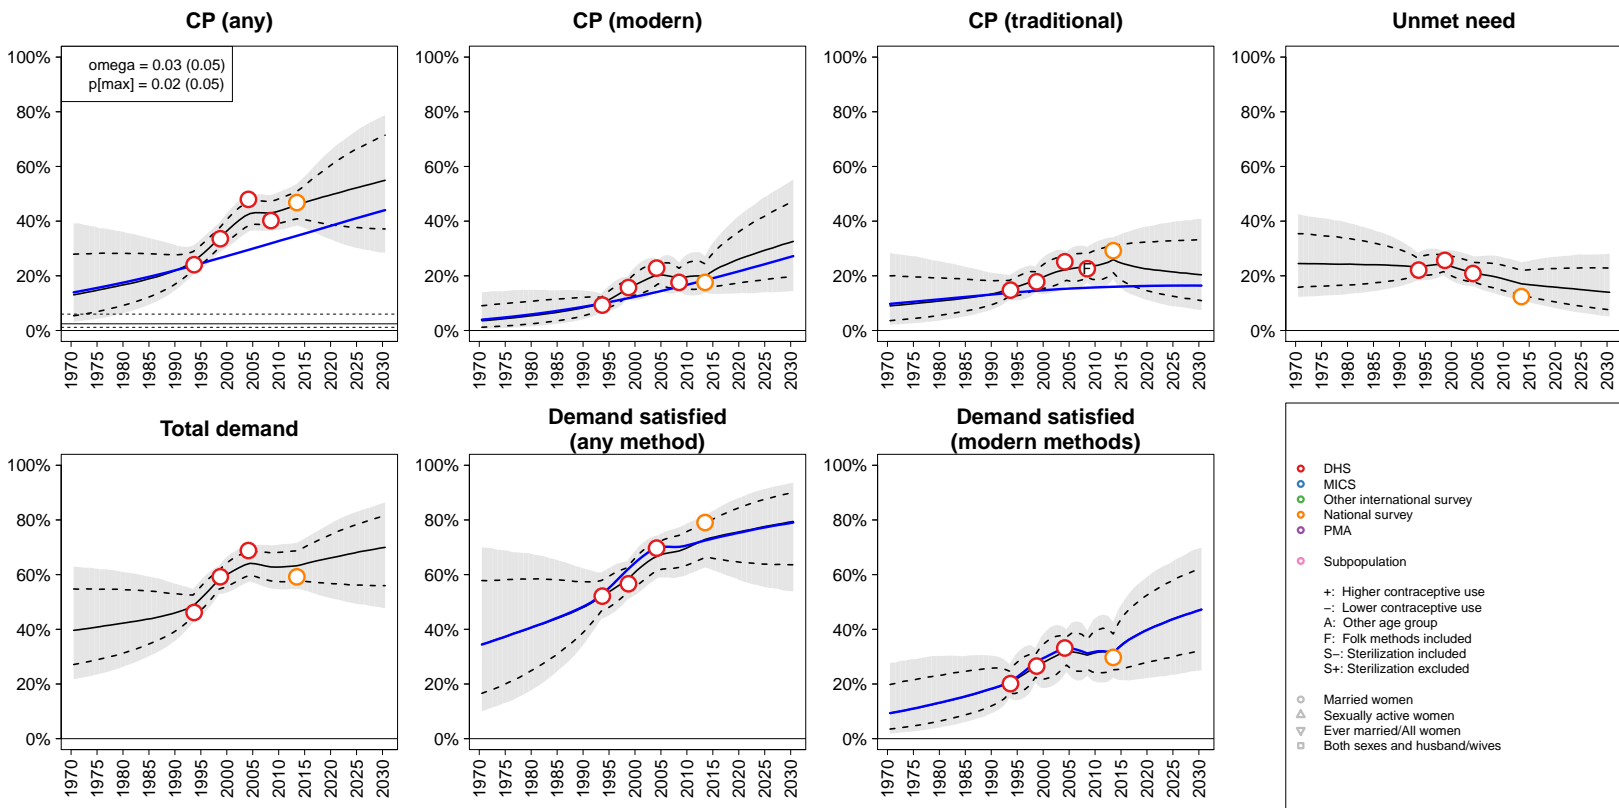

Turkmenistan (Central Asia) --- Married / In-Union

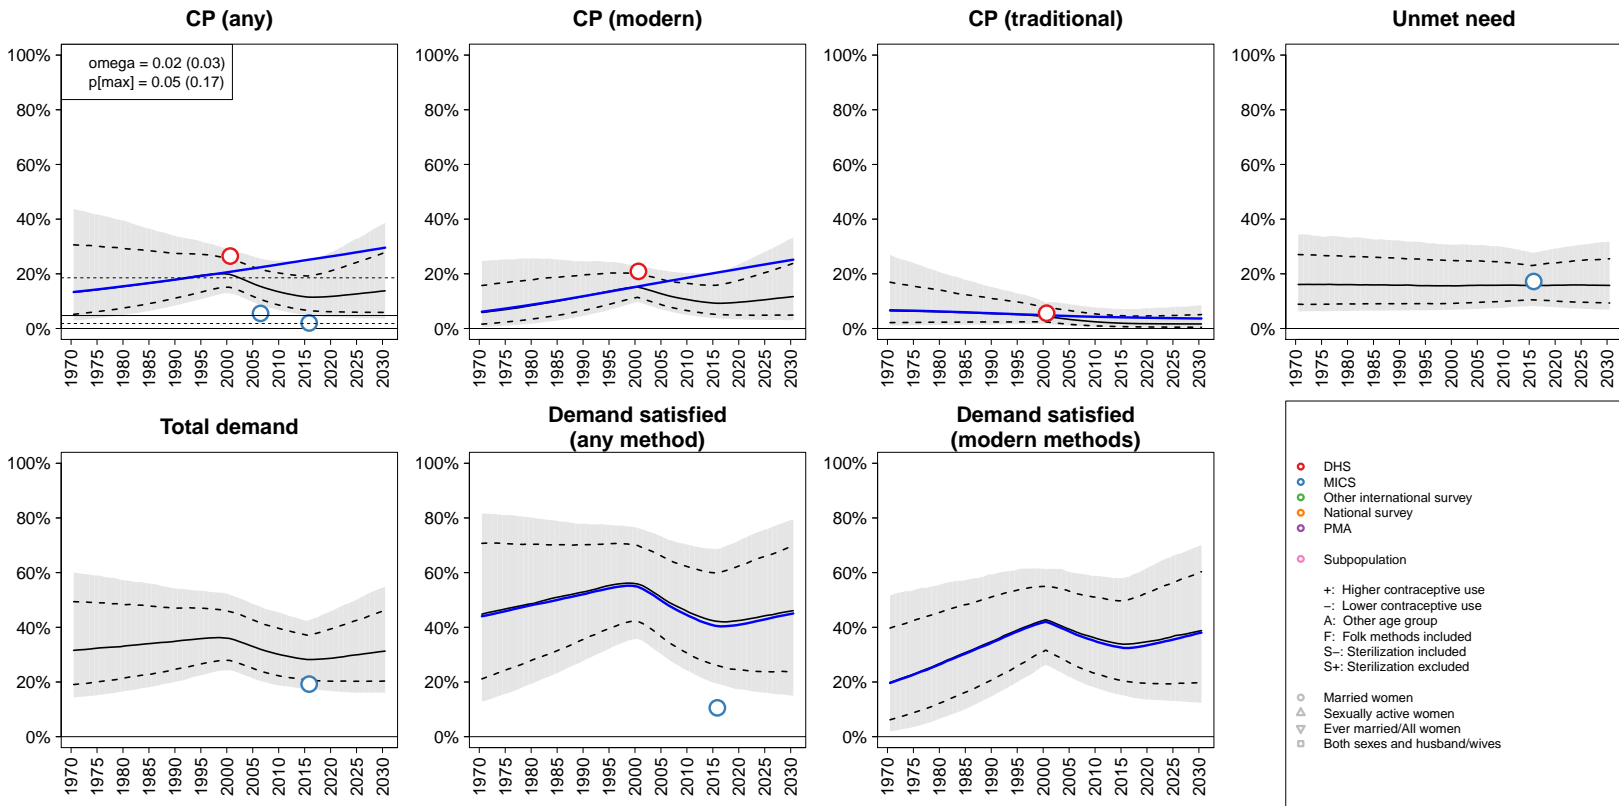

Uganda (Eastern Africa) --- Married / In-Union

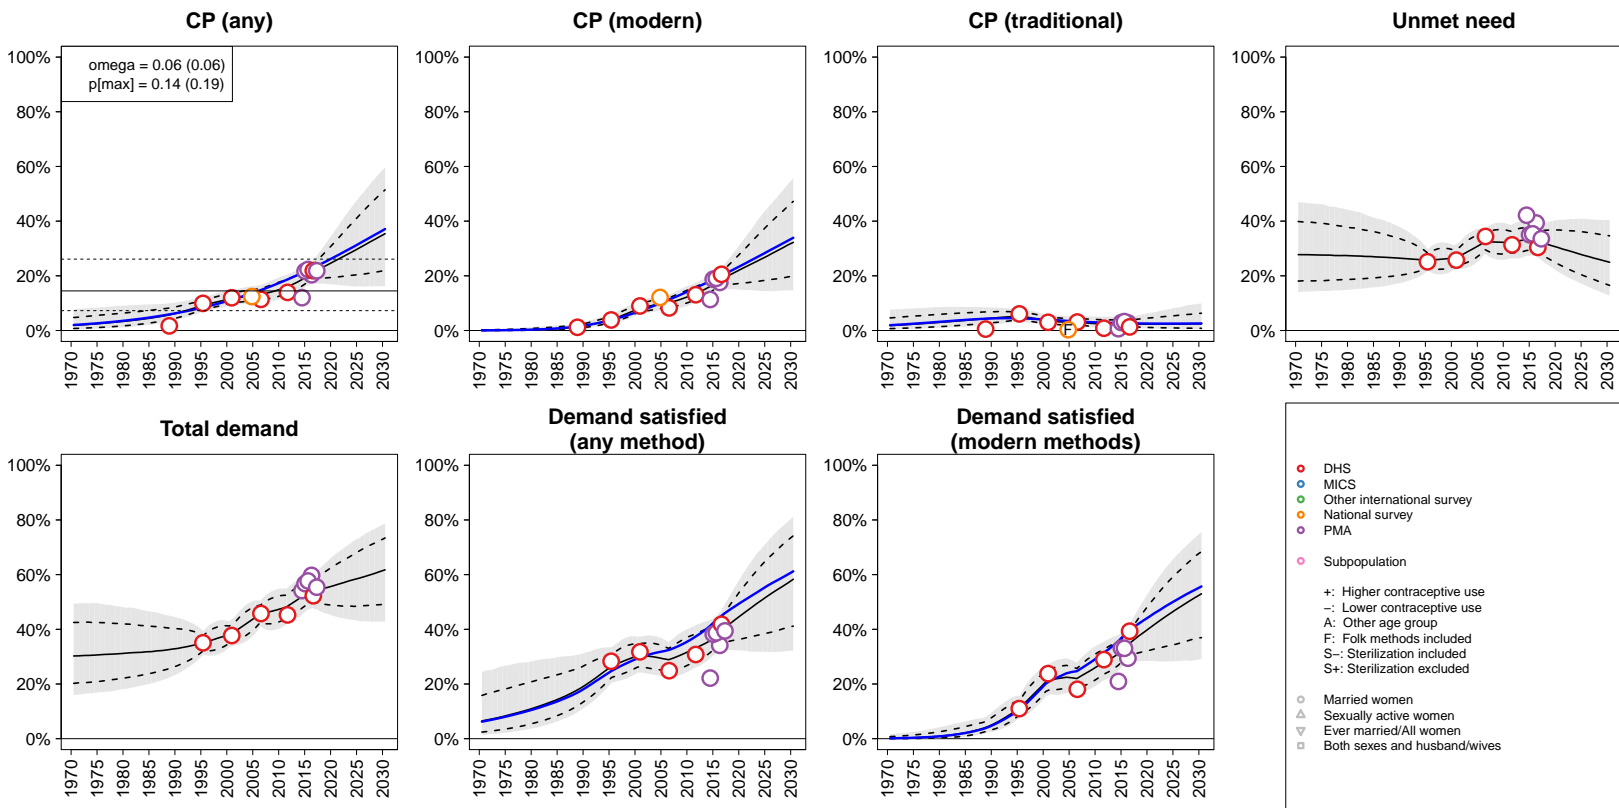

Ukraine (Eastern Europe) --- Married / In-Union

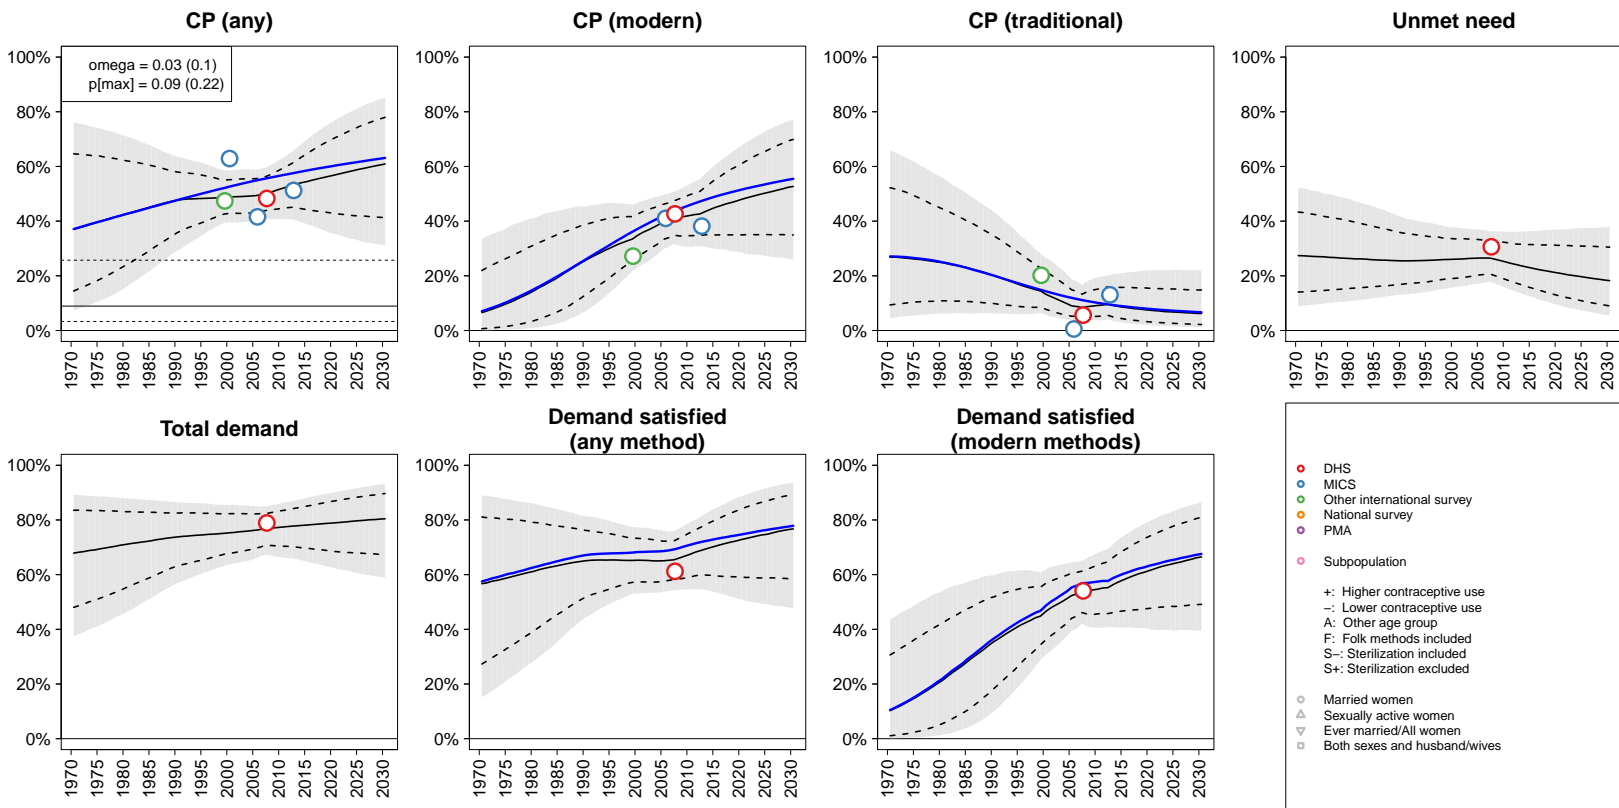

United Rep. of Tanzania (Eastern Africa) — Married / In-Union

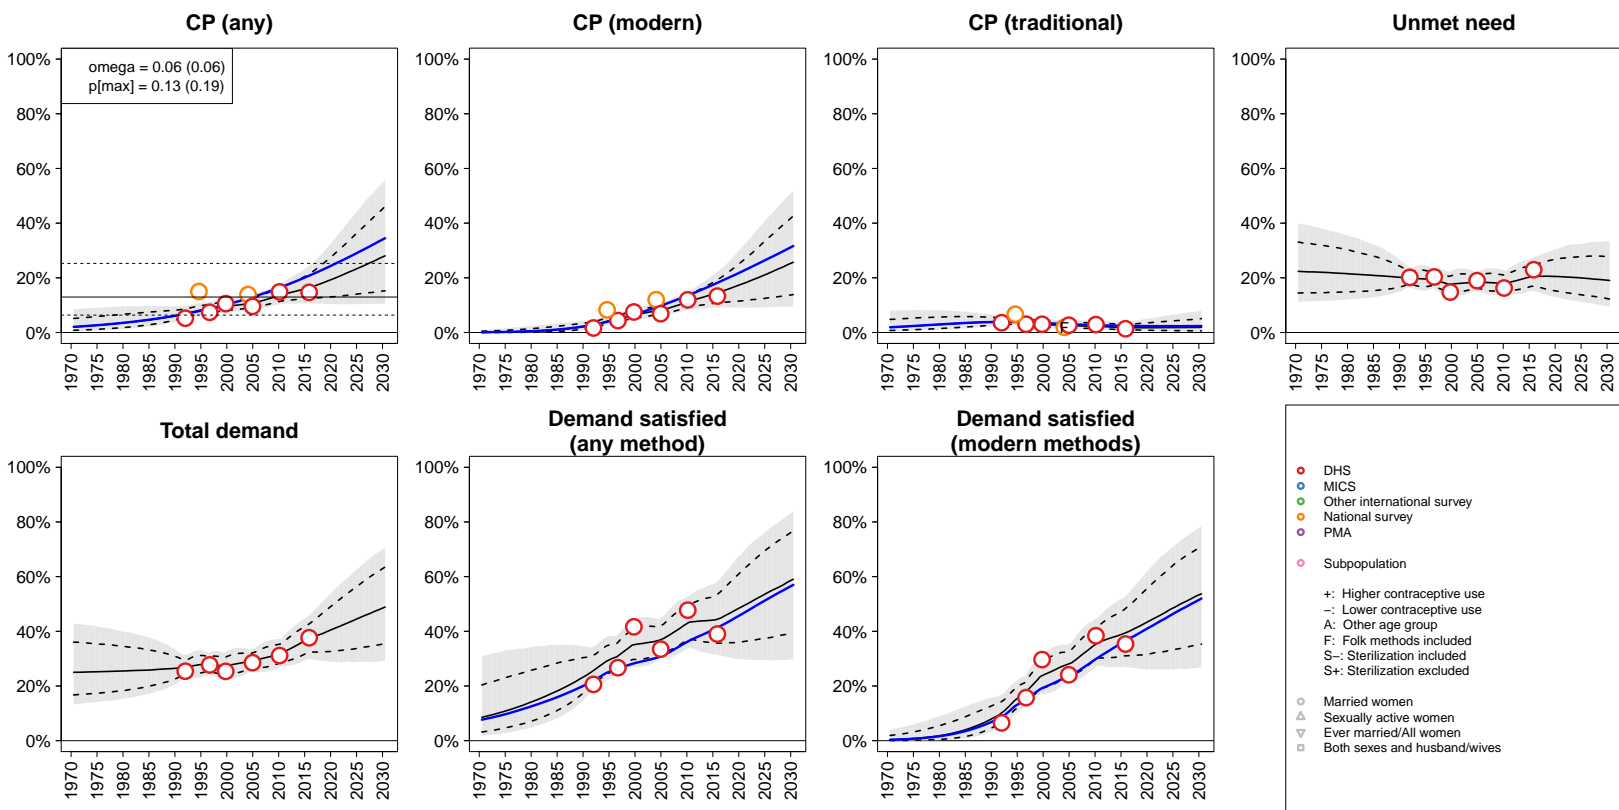

United States of America (Northern America) --- Married / In-Union

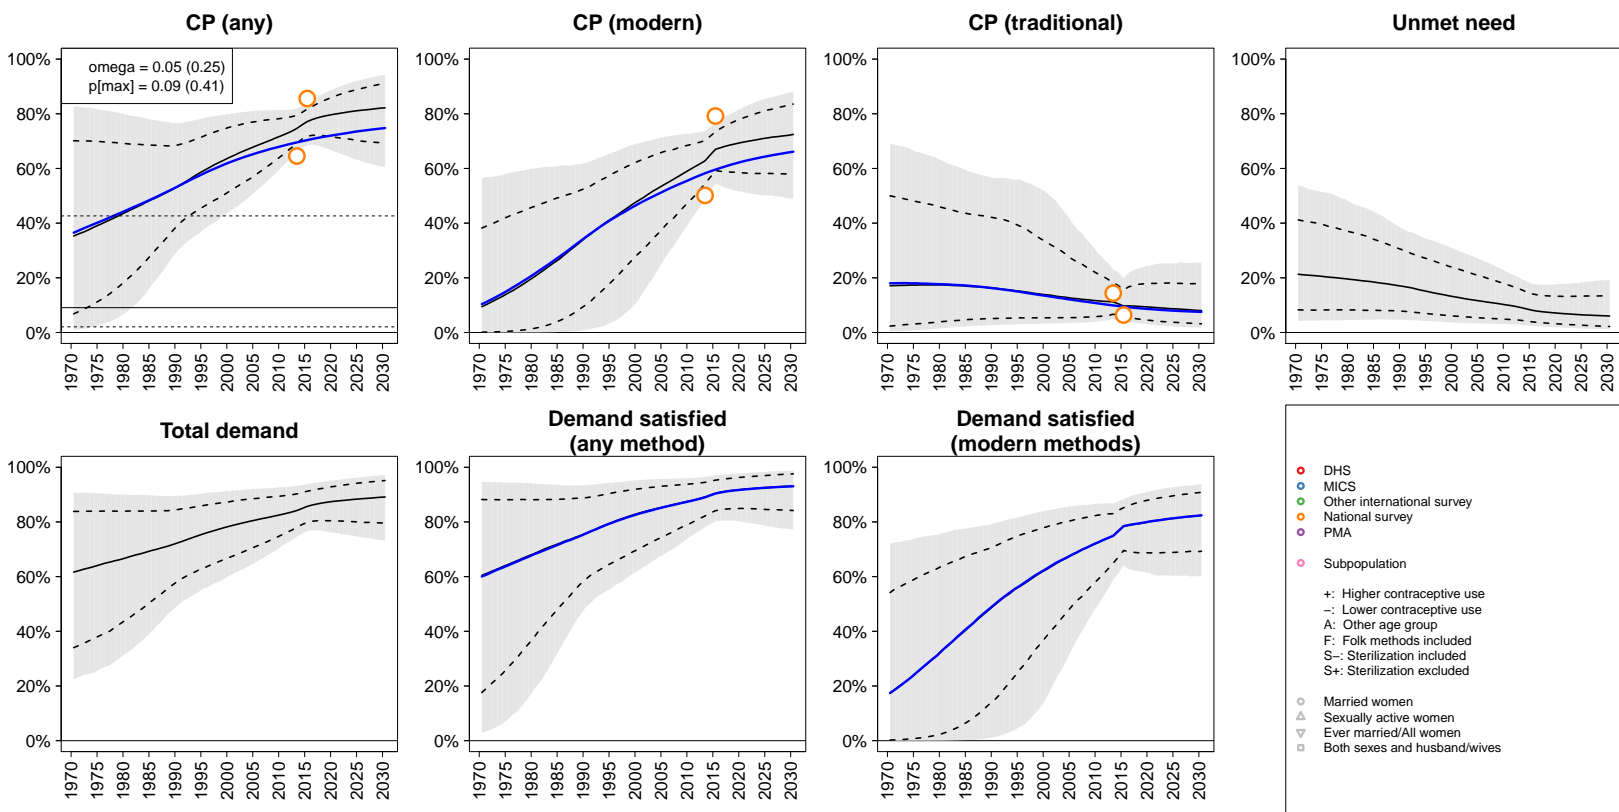



Uzbekistan (Central Asia) --- Married / In-Union

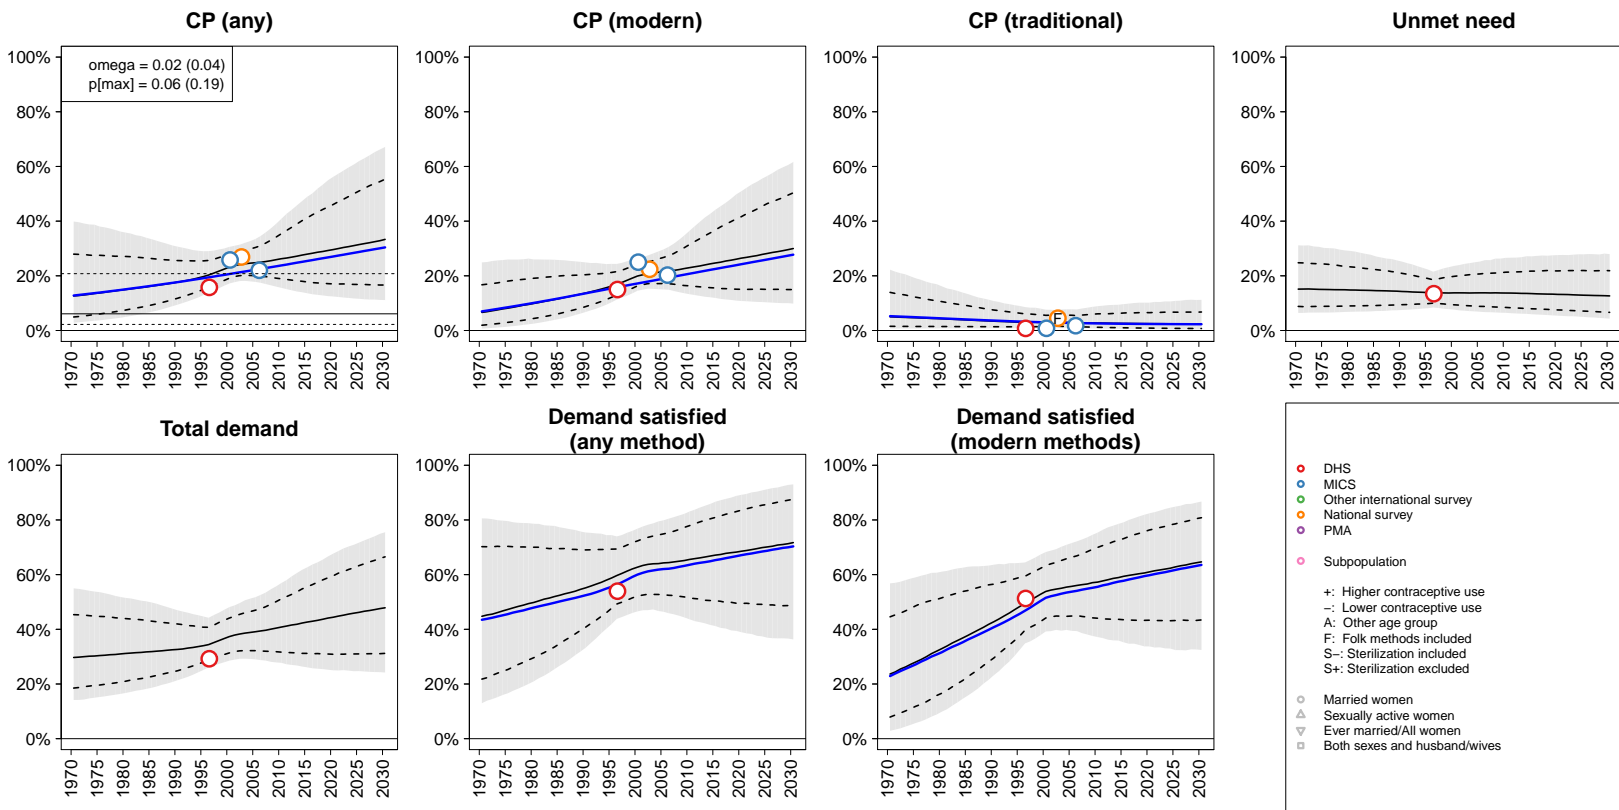

Venezuela, Bolivarian Republic of (South America) --- Married / In-Union

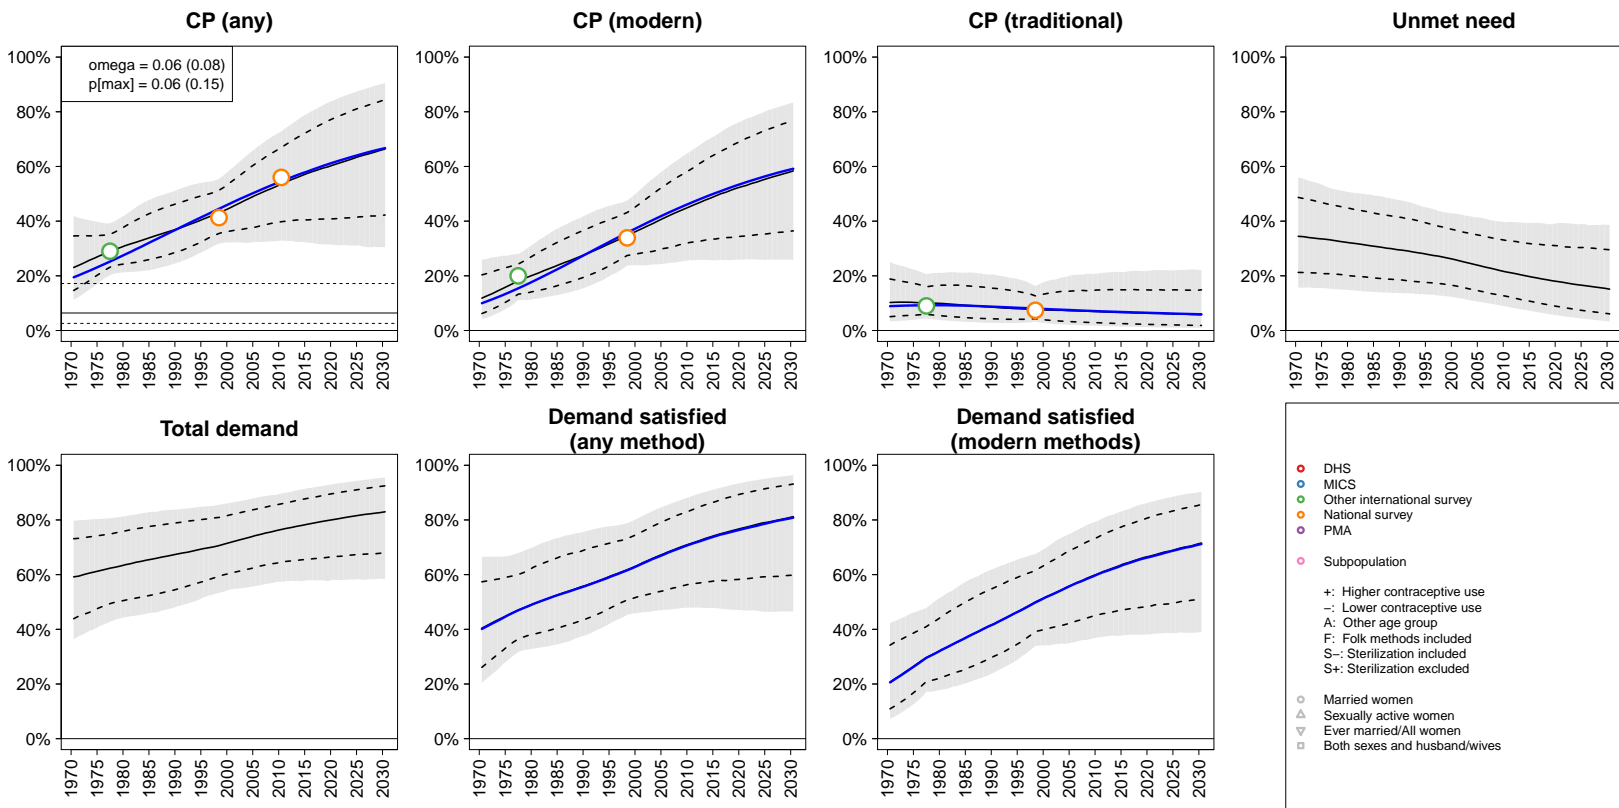

Viet Nam (South-eastern Asia) --- Married / In-Union

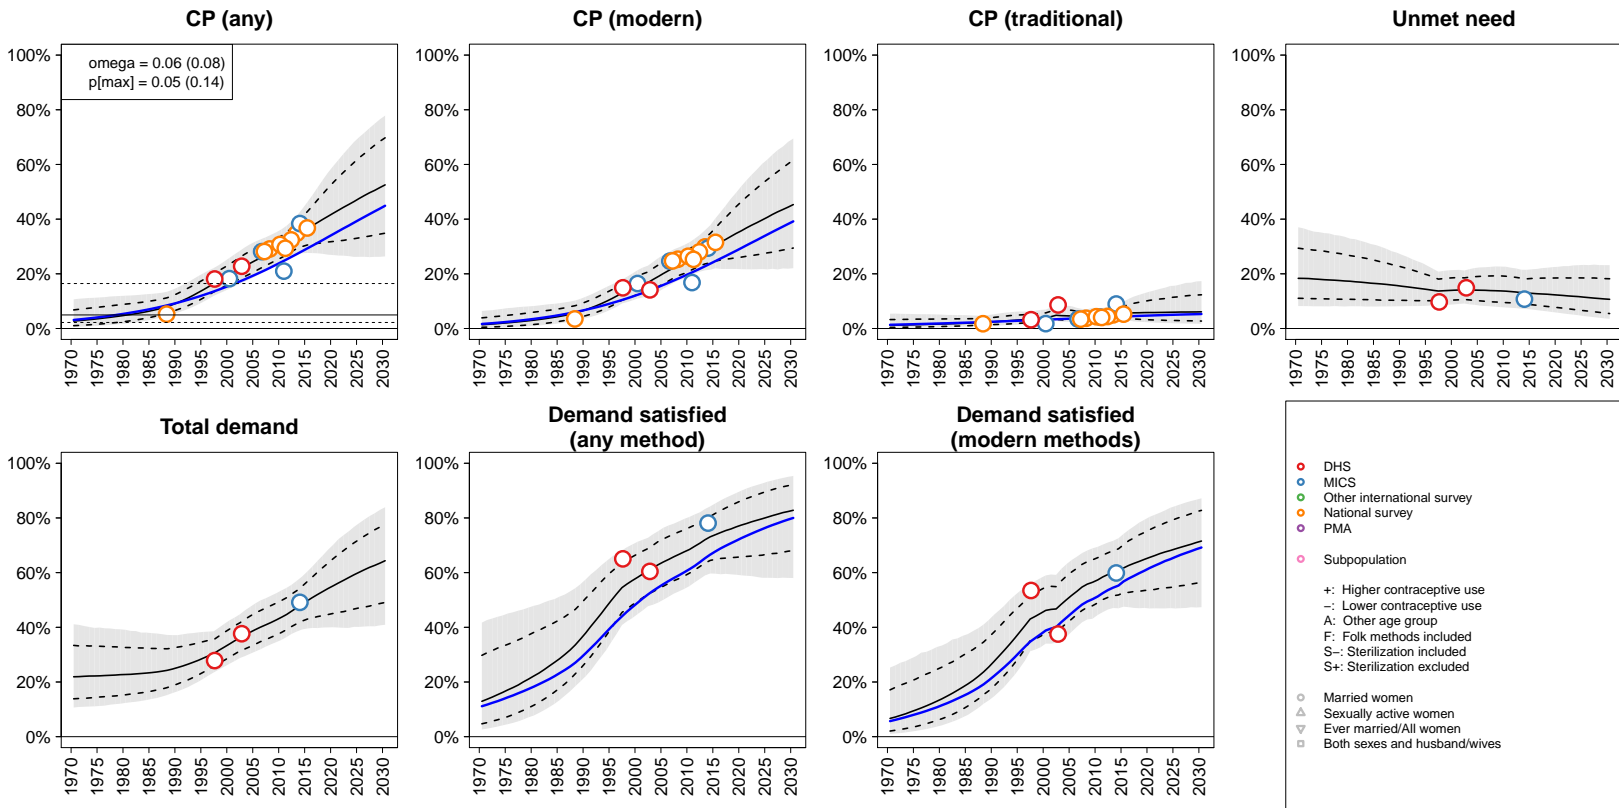

Yemen (Western Asia) --- Married / In-Union

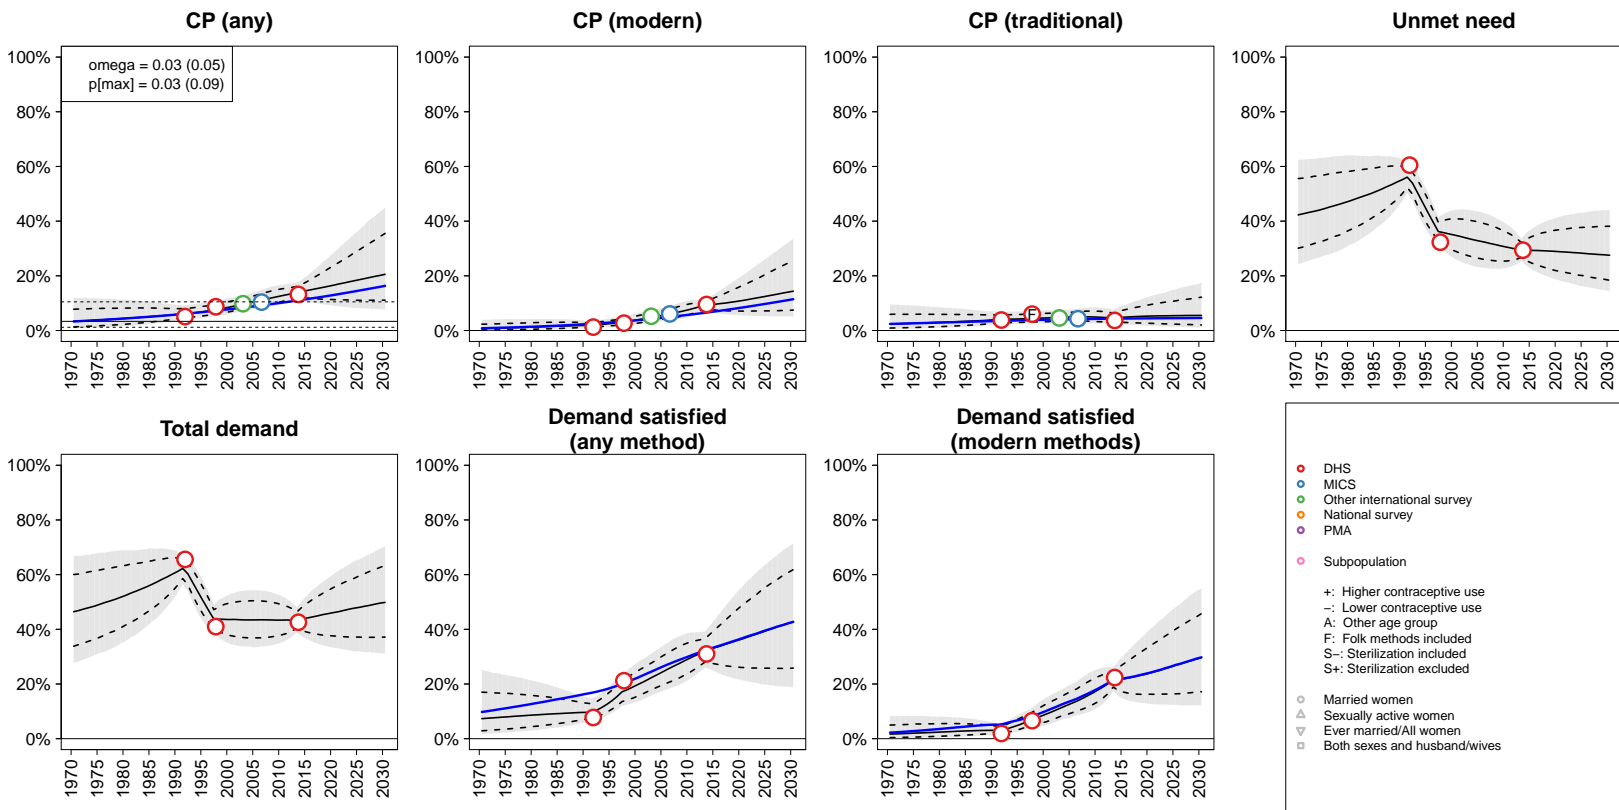

Zambia (Eastern Africa) --- Married / In-Union

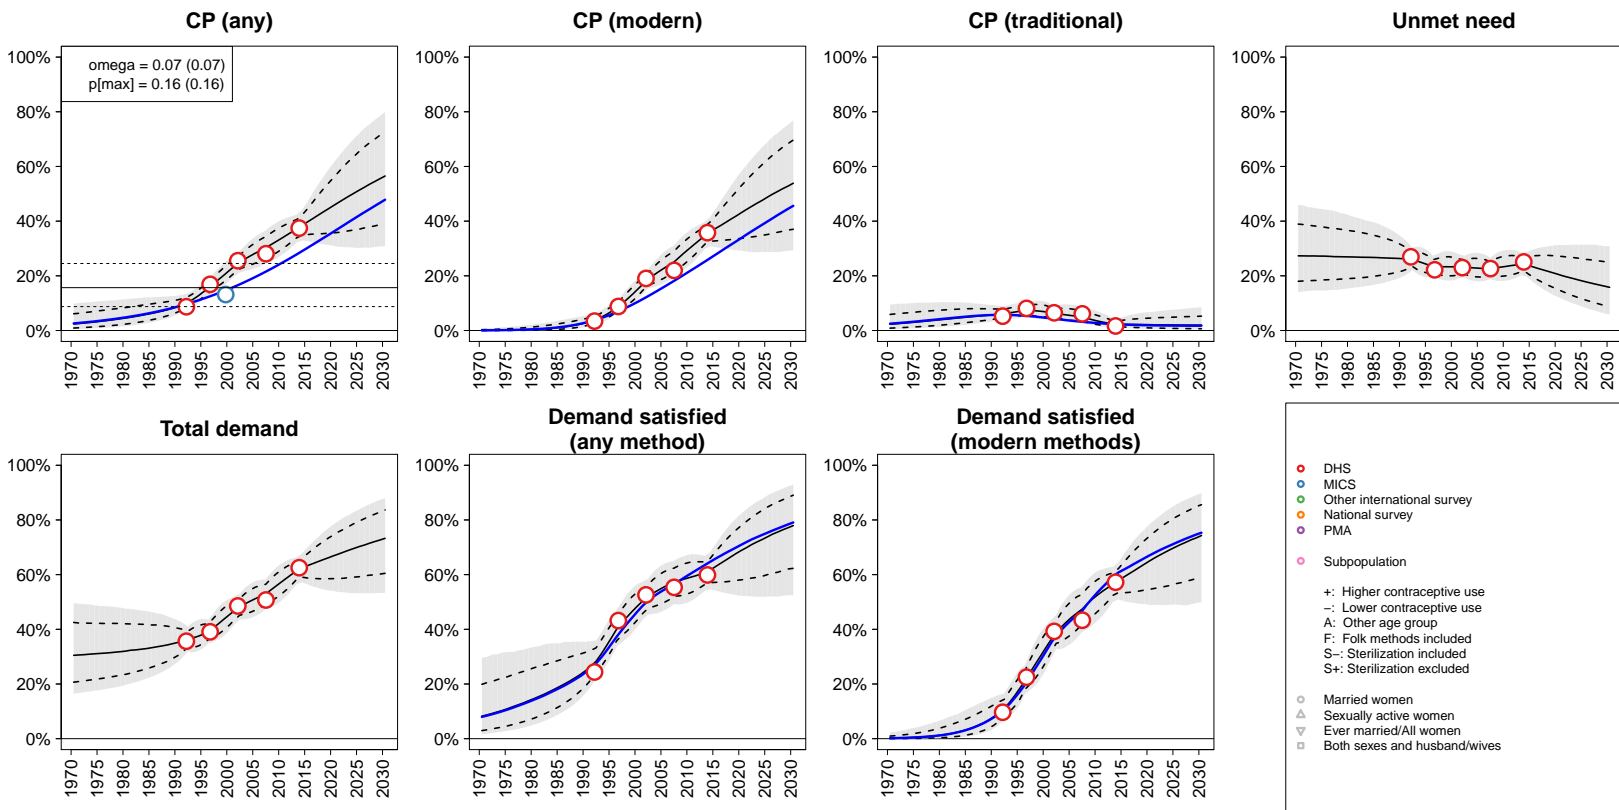

Zimbabwe (Eastern Africa) --- Married / In-Union

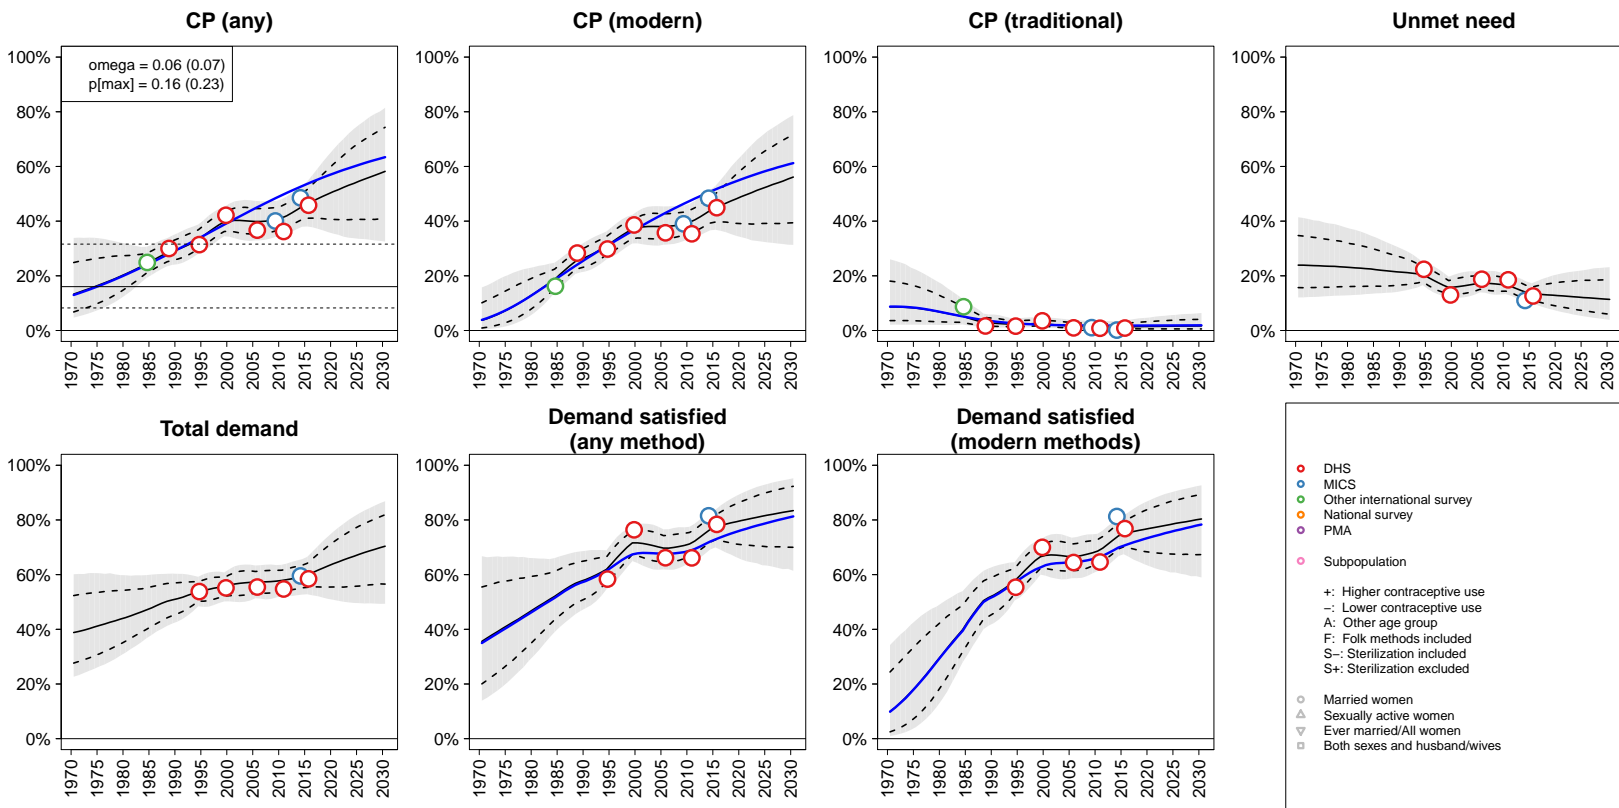

### 4.3 All Adolescent Women

Albania ---- All women

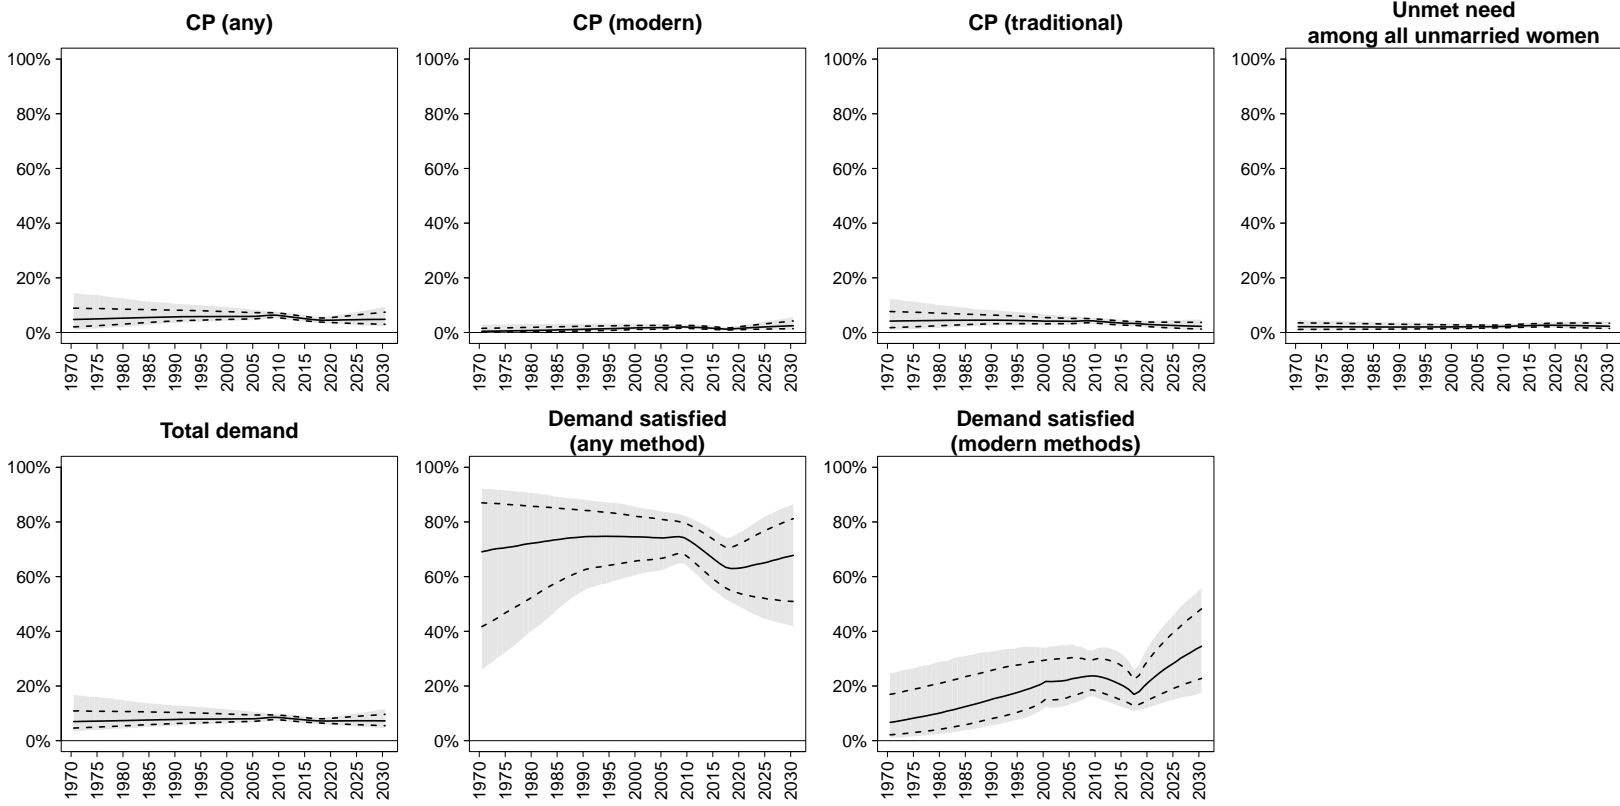



Angola --- All women

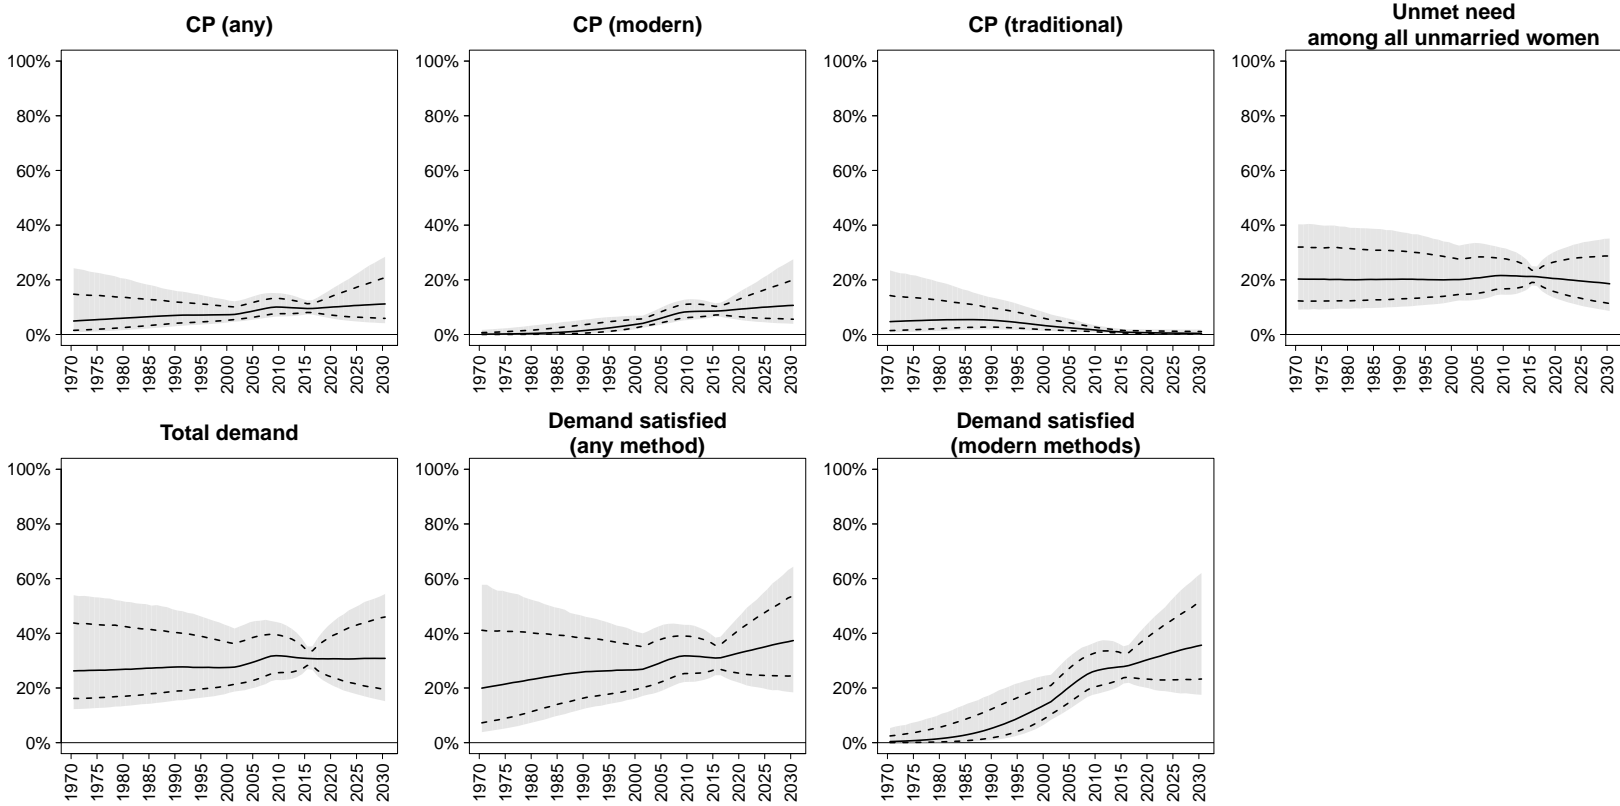

Armenia --- All women

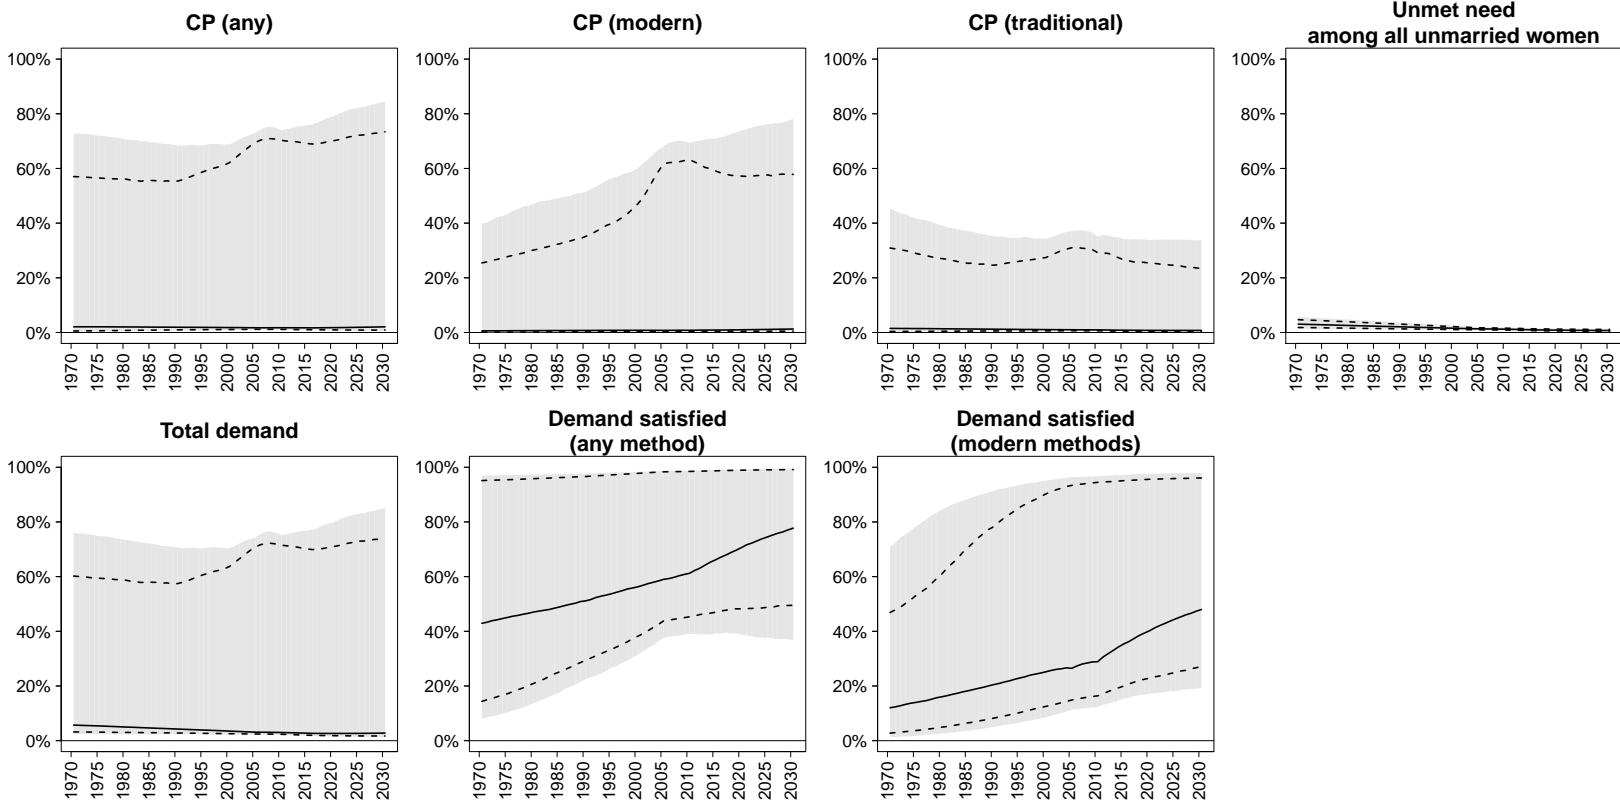

Barbados --- All women

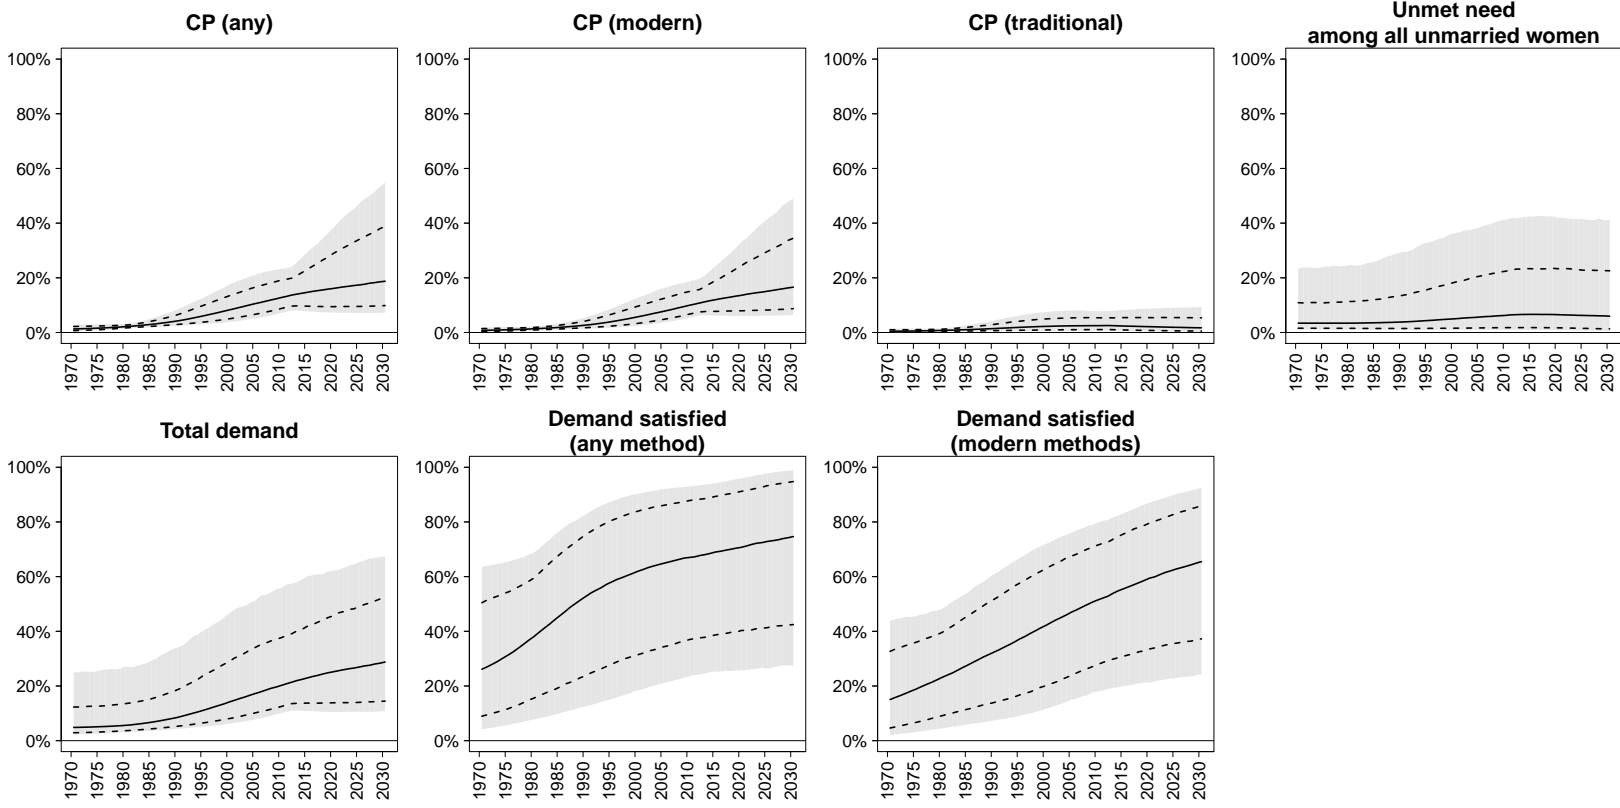

Benin --- All women

CP (any)

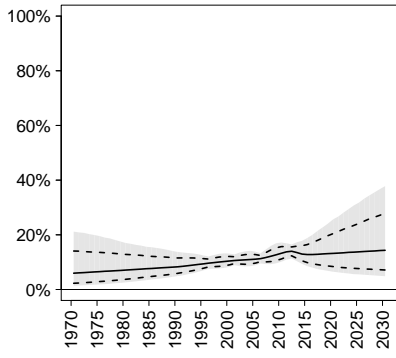

CP (modern)

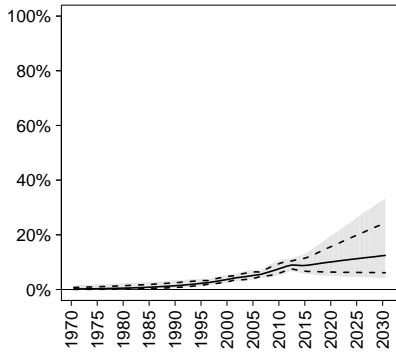

CP (traditional)

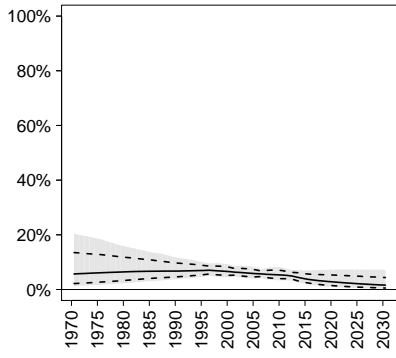

Unmet need among all unmarried women

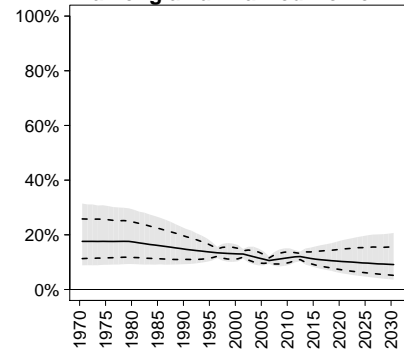

Total demand

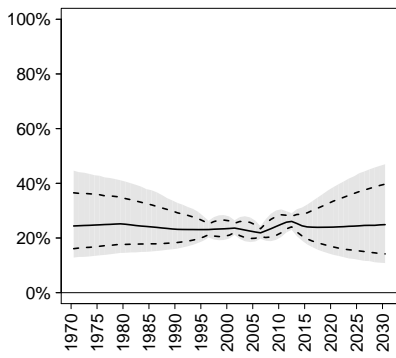

Bolivia (Plurinational State of) — All women

CP (any)

CP (modern)

CP (traditional)

Unmet need among all unmarried women

Total demand

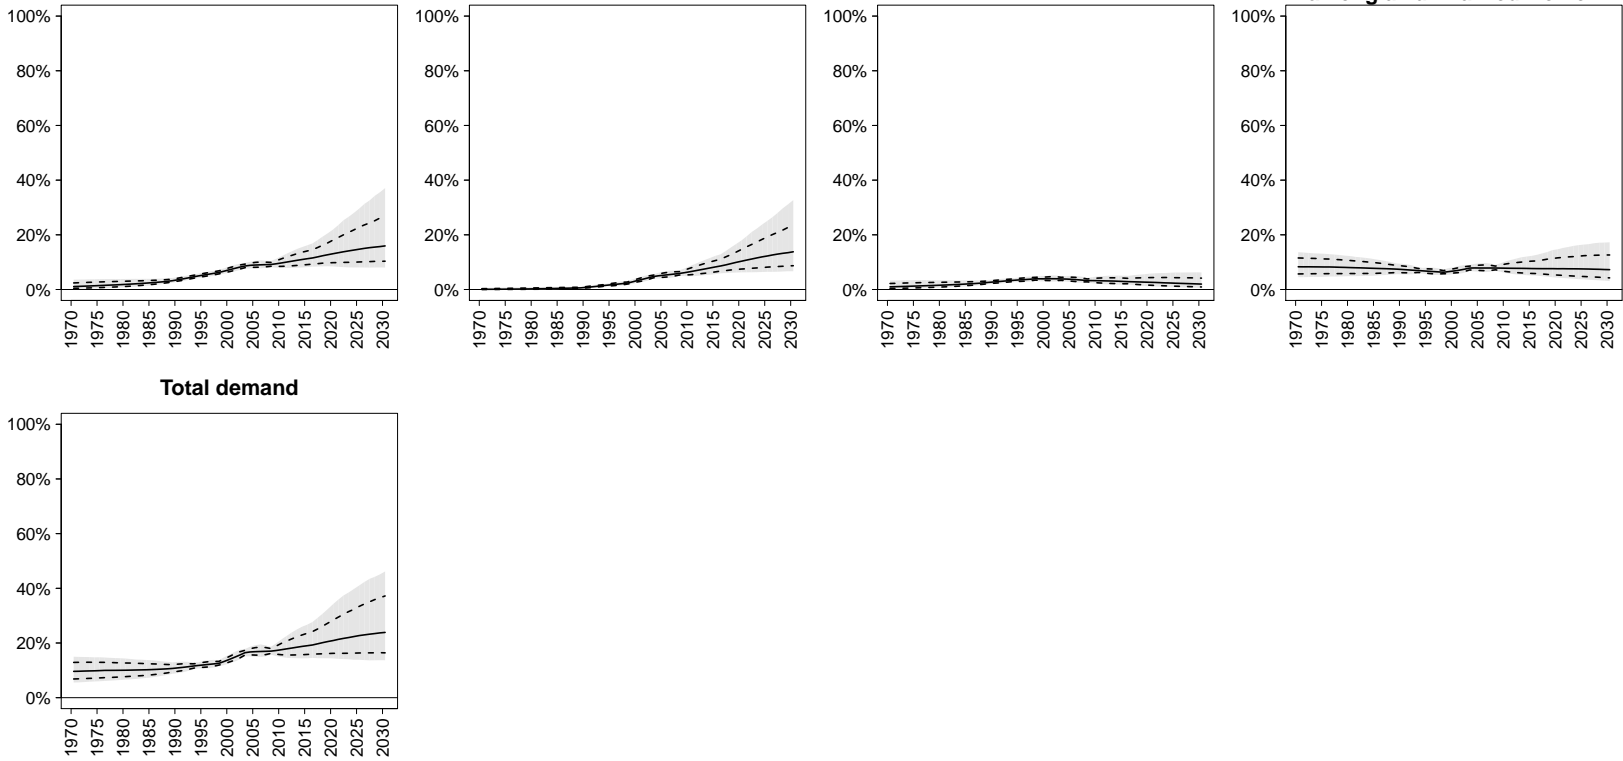

Bosnia and Herzegovina ---- All women

CP (any)

CP (modern)

CP (traditional)

Unmet need among all unmarried women

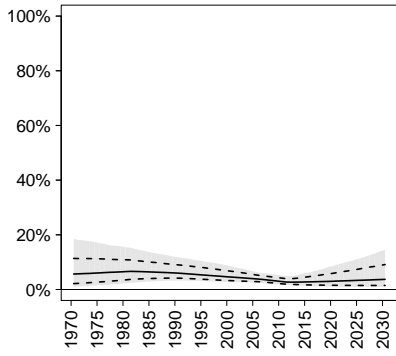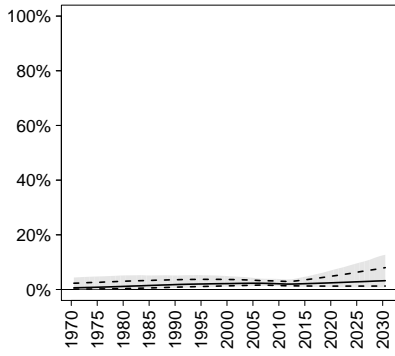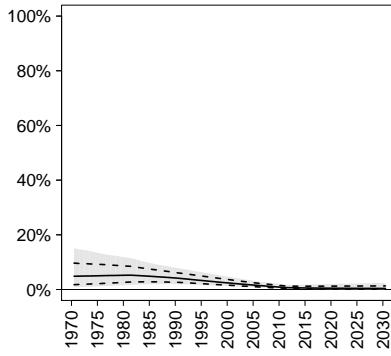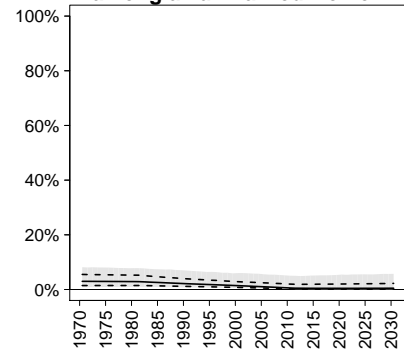

Total demand

Demand satisfied (any method)

Demand satisfied (modern methods)

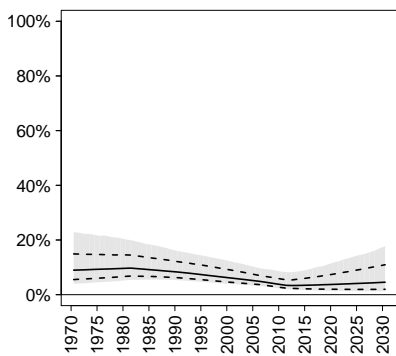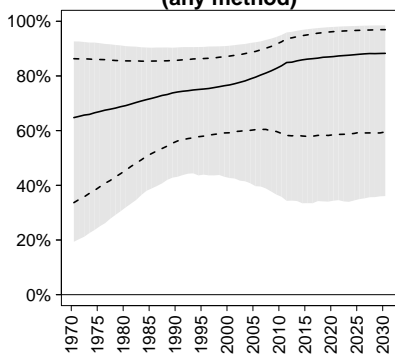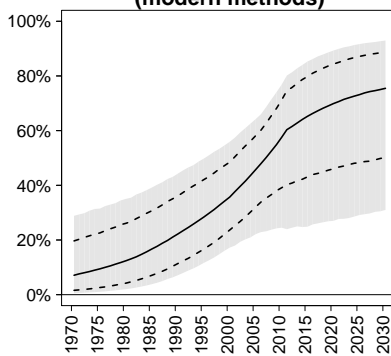

Brazil --- All women

CP (any)

CP (modern)

CP (traditional)

Unmet need among all unmarried women

Total demand

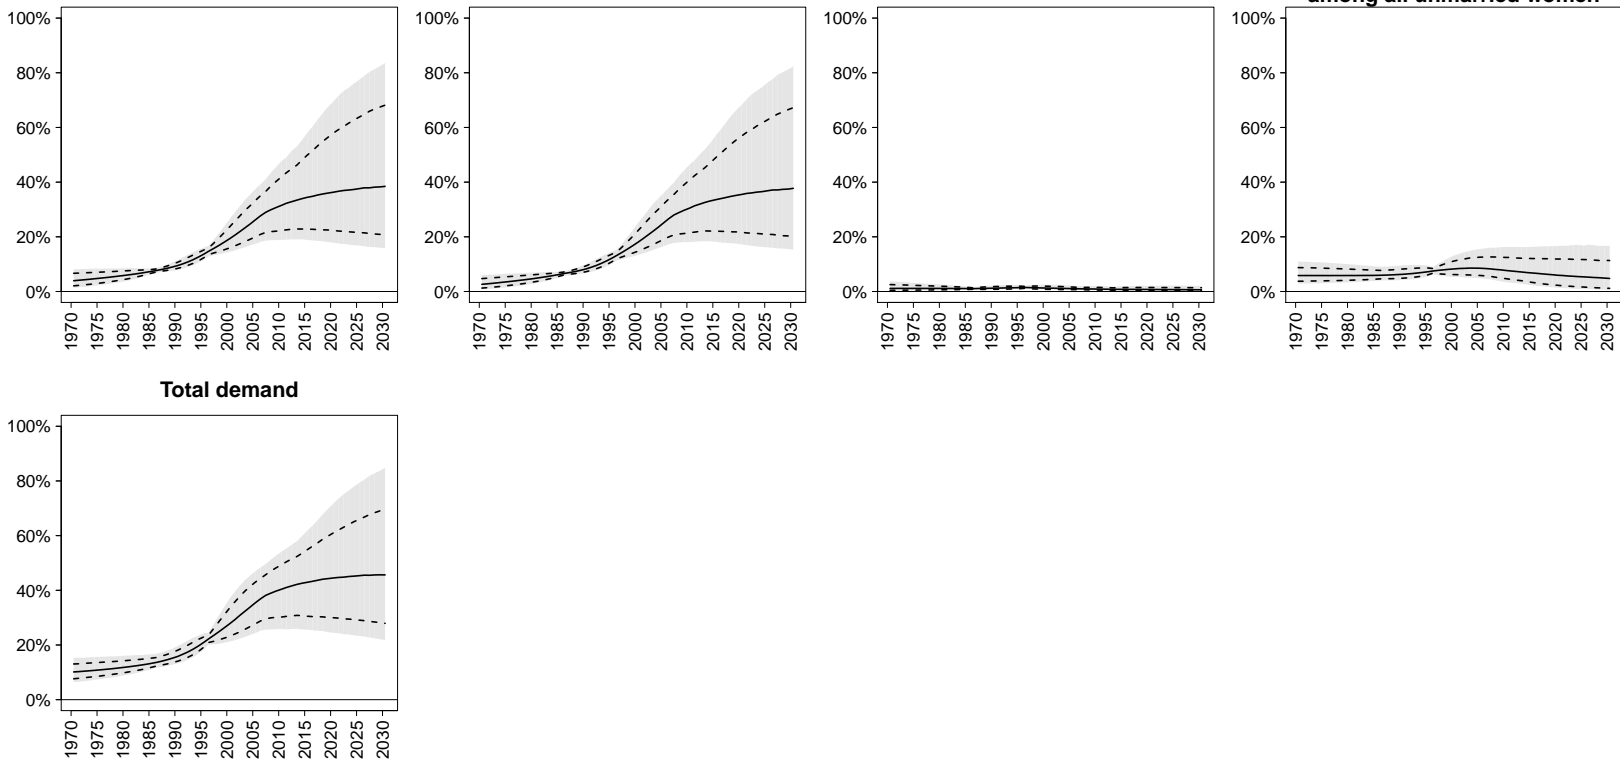

Burkina Faso ---- All women

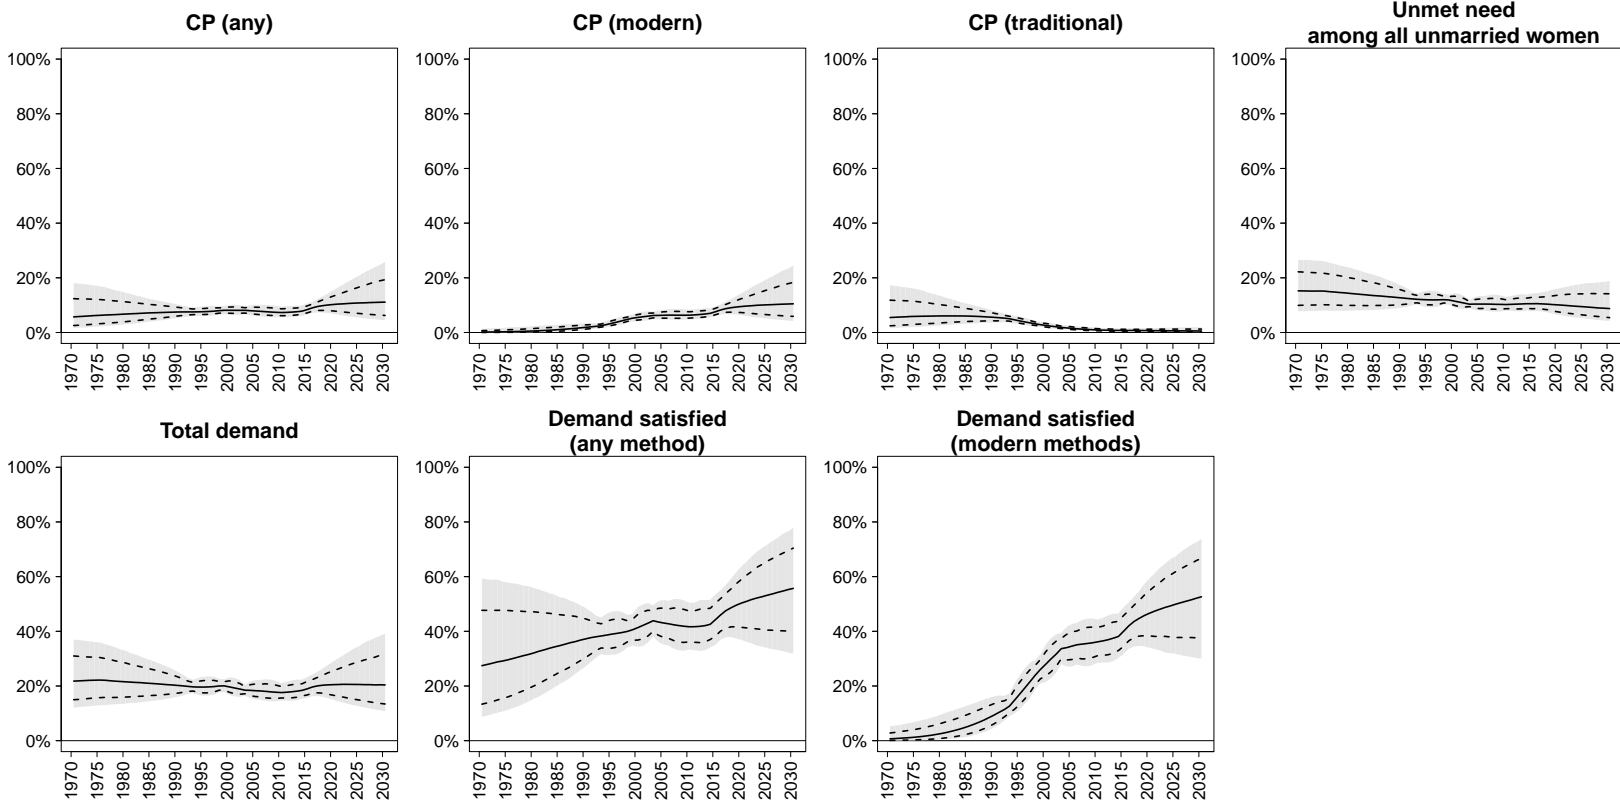



Burundi ---- All women

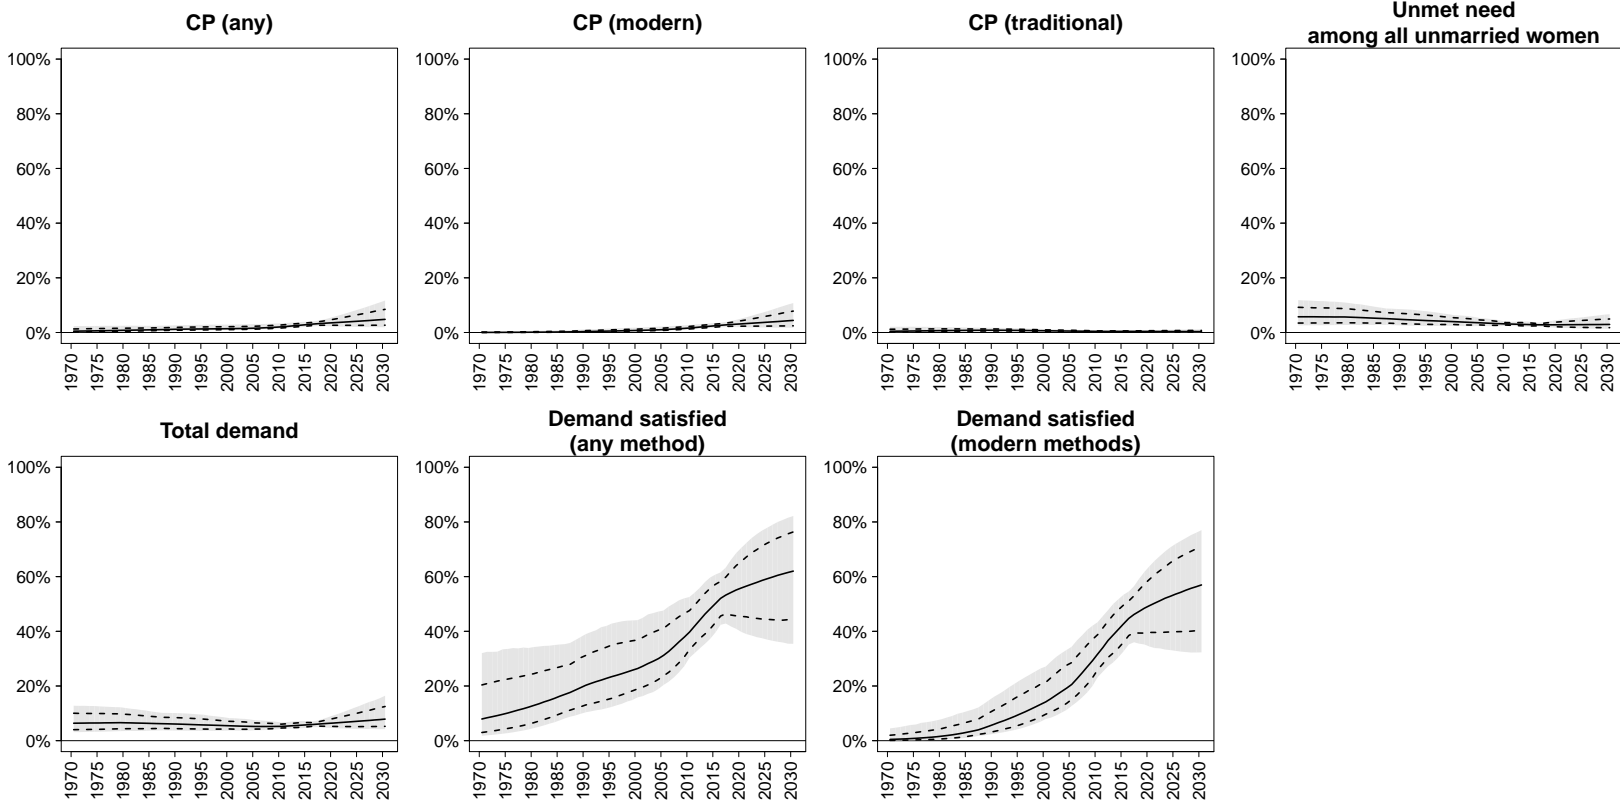

Cabo Verde --- All women

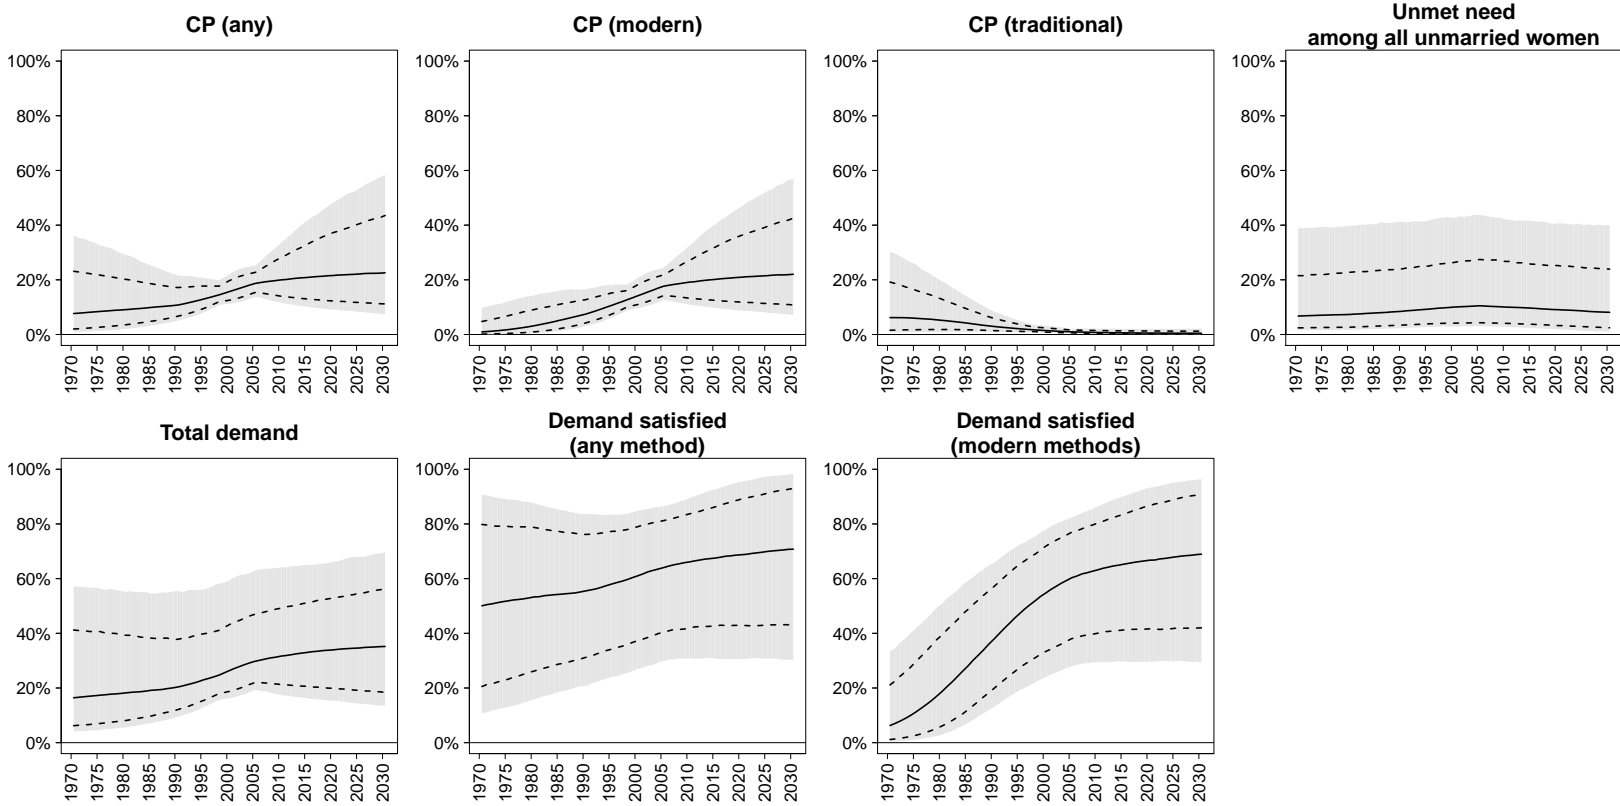

Cambodia --- All women

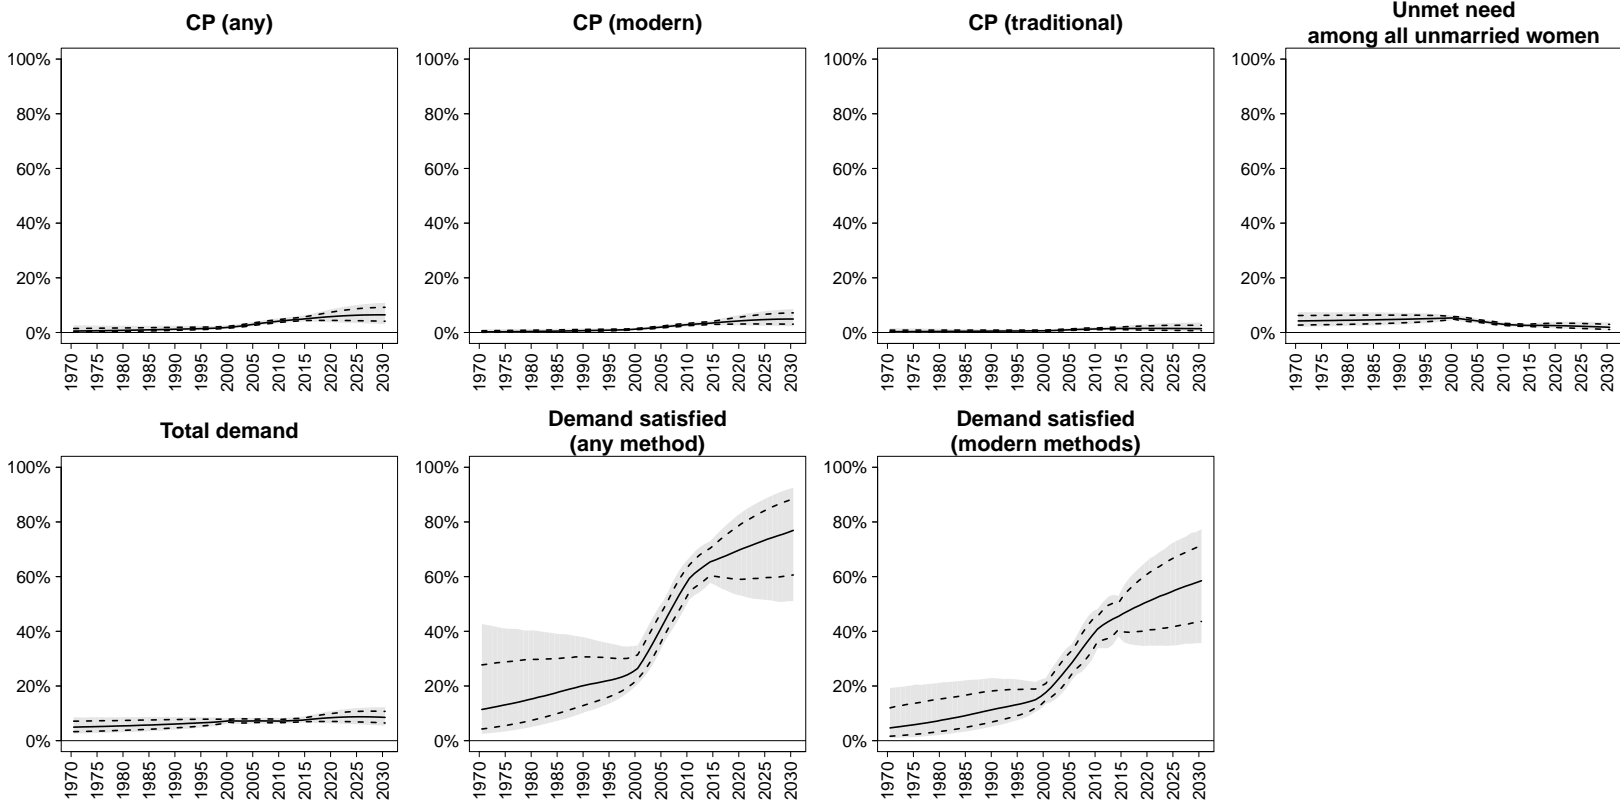

Cameroon --- All women

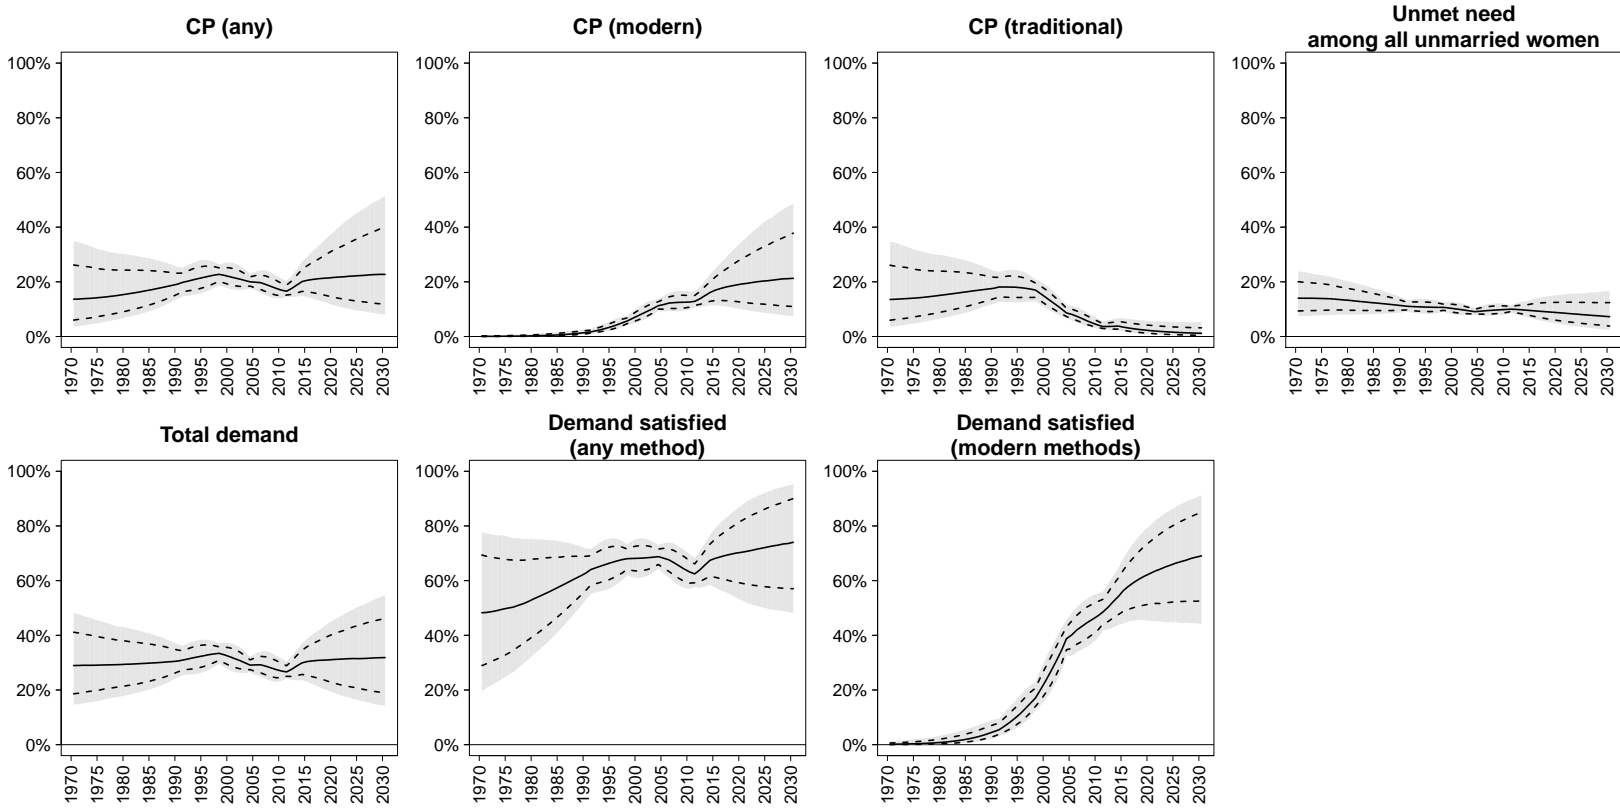

Central African Republic — All women

CP (any)

CP (modern)

CP (traditional)

Unmet need among all unmarried women

Total demand

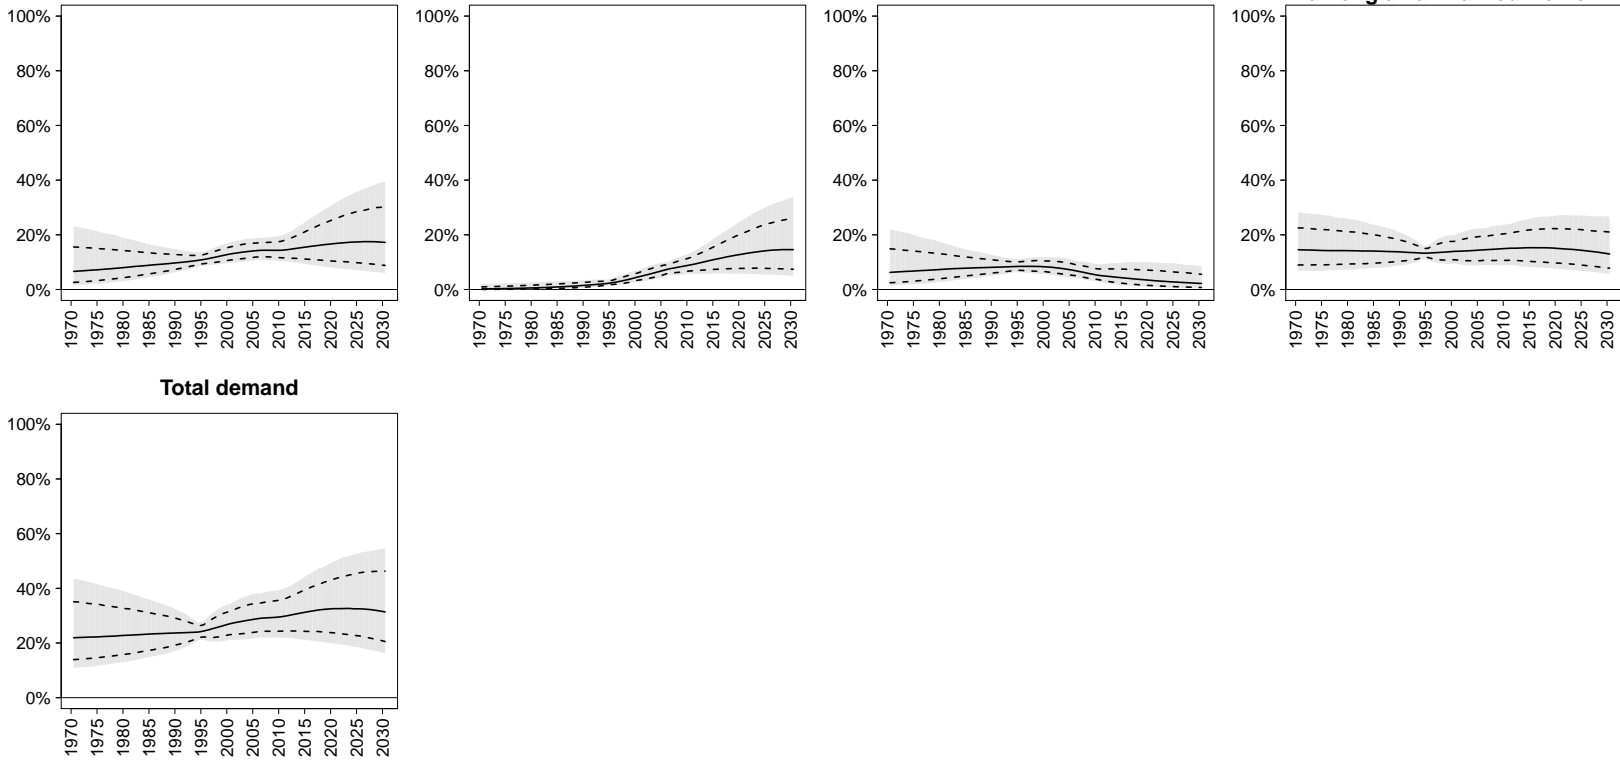

Chad ---- All women

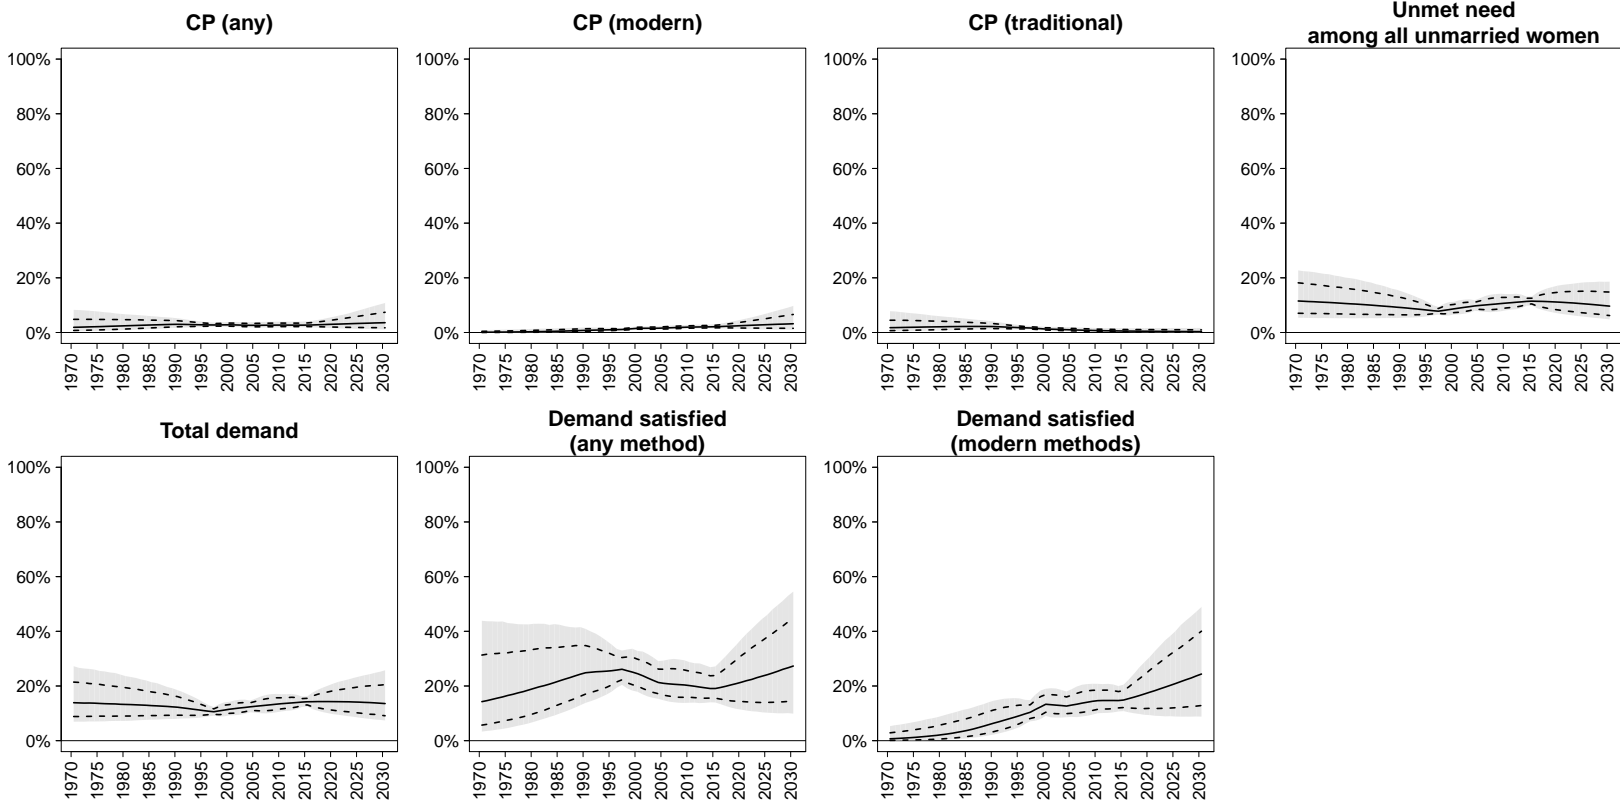

Colombia --- All women

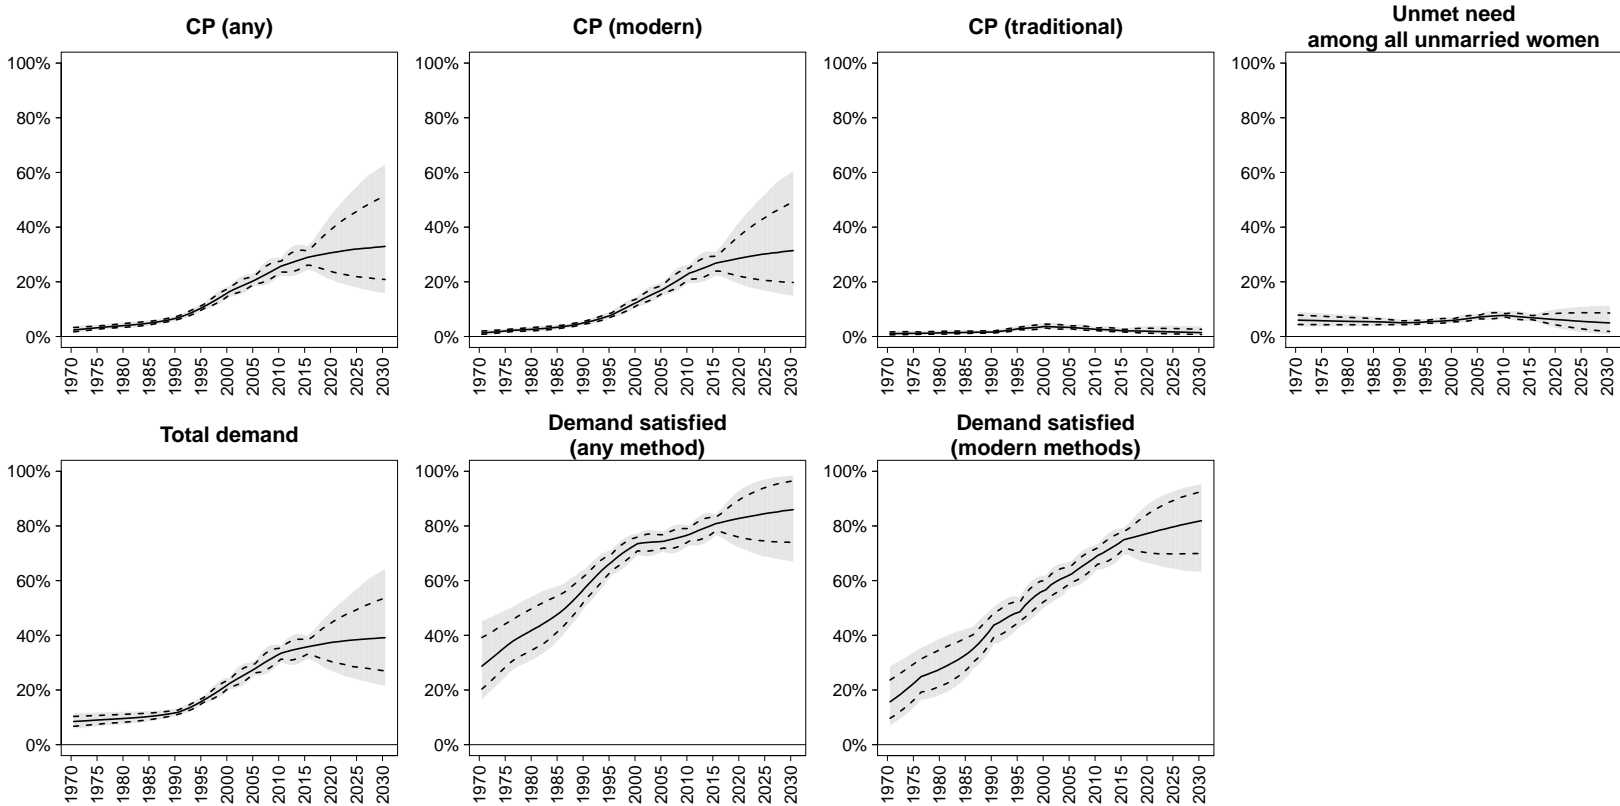

Comoros --- All women

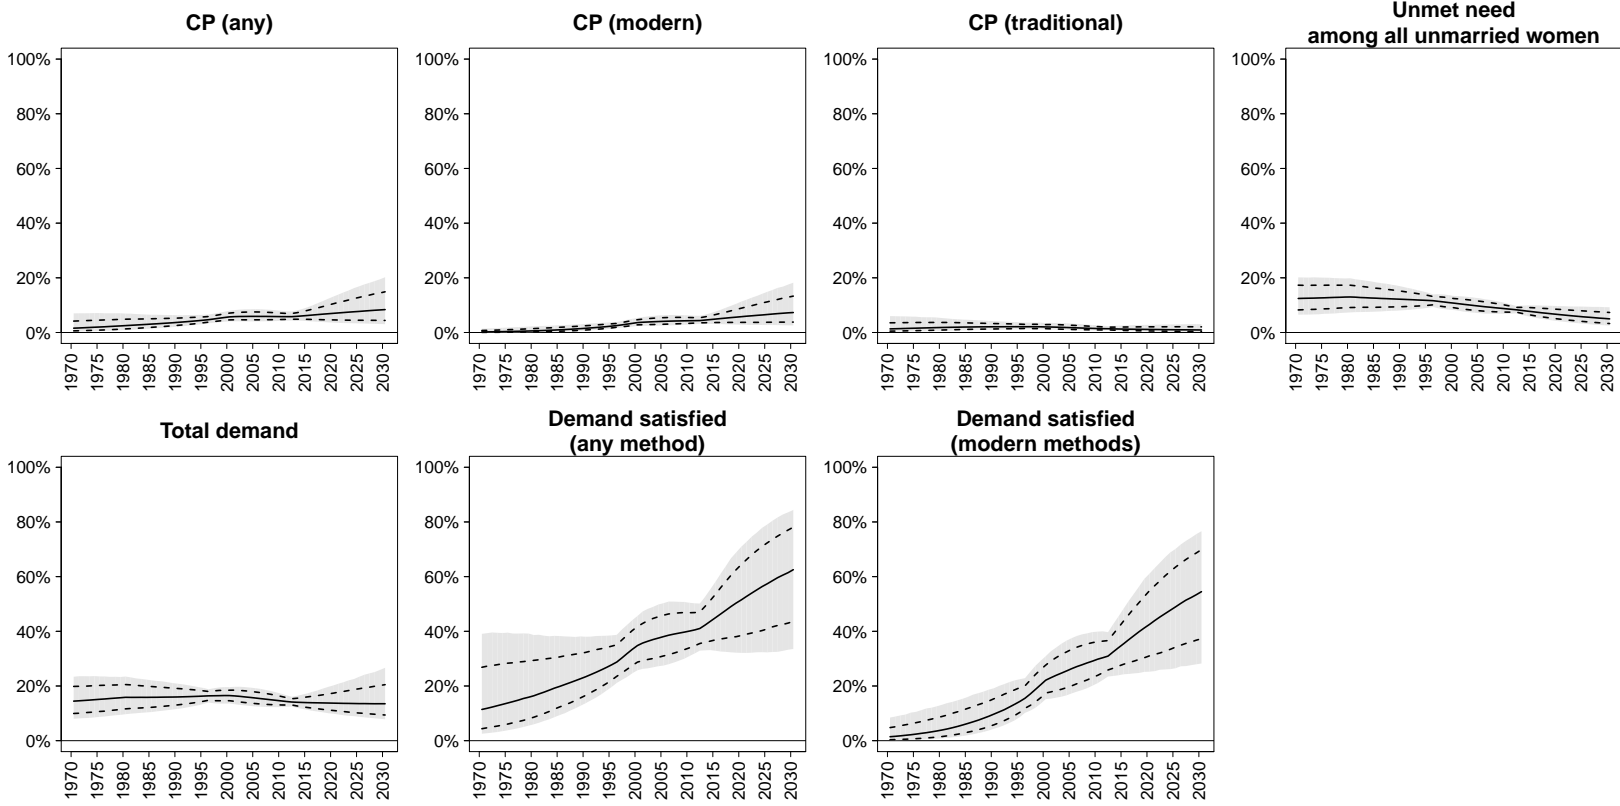



Congo --- All women

CP (any)

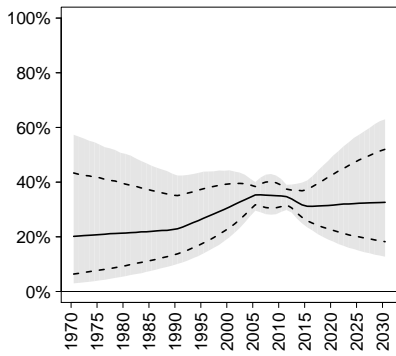

CP (modern)

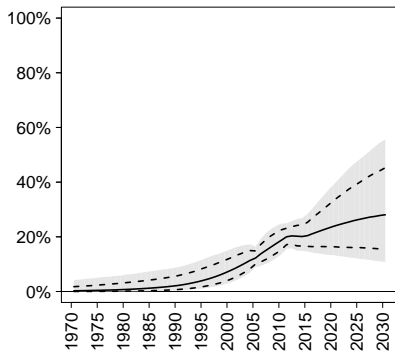

CP (traditional)

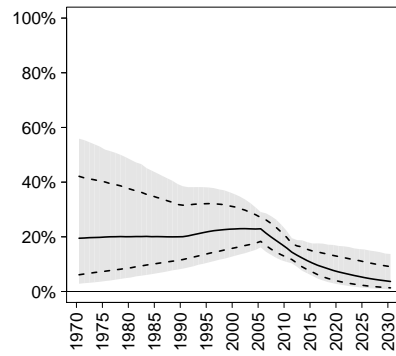

Unmet need among all unmarried women

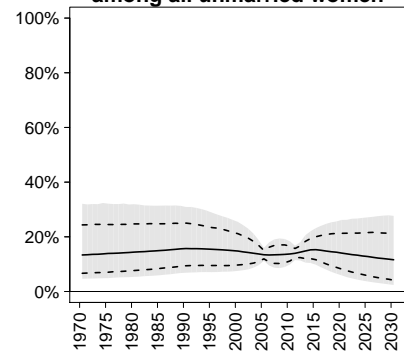

Total demand

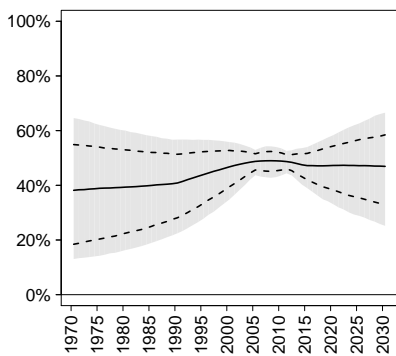

Costa Rica --- All women

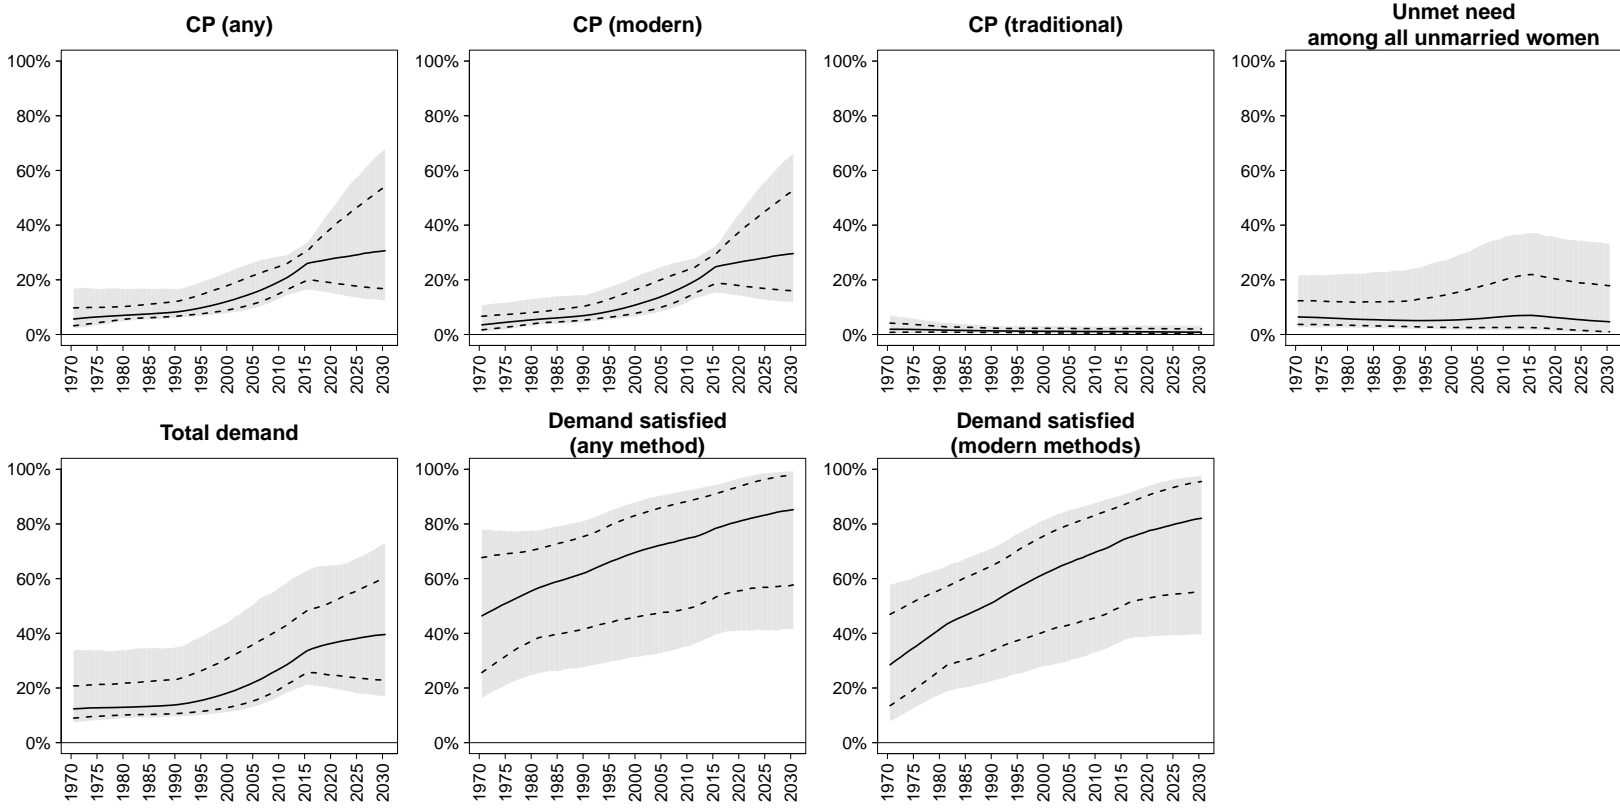

Côte d'Ivoire ---- All women

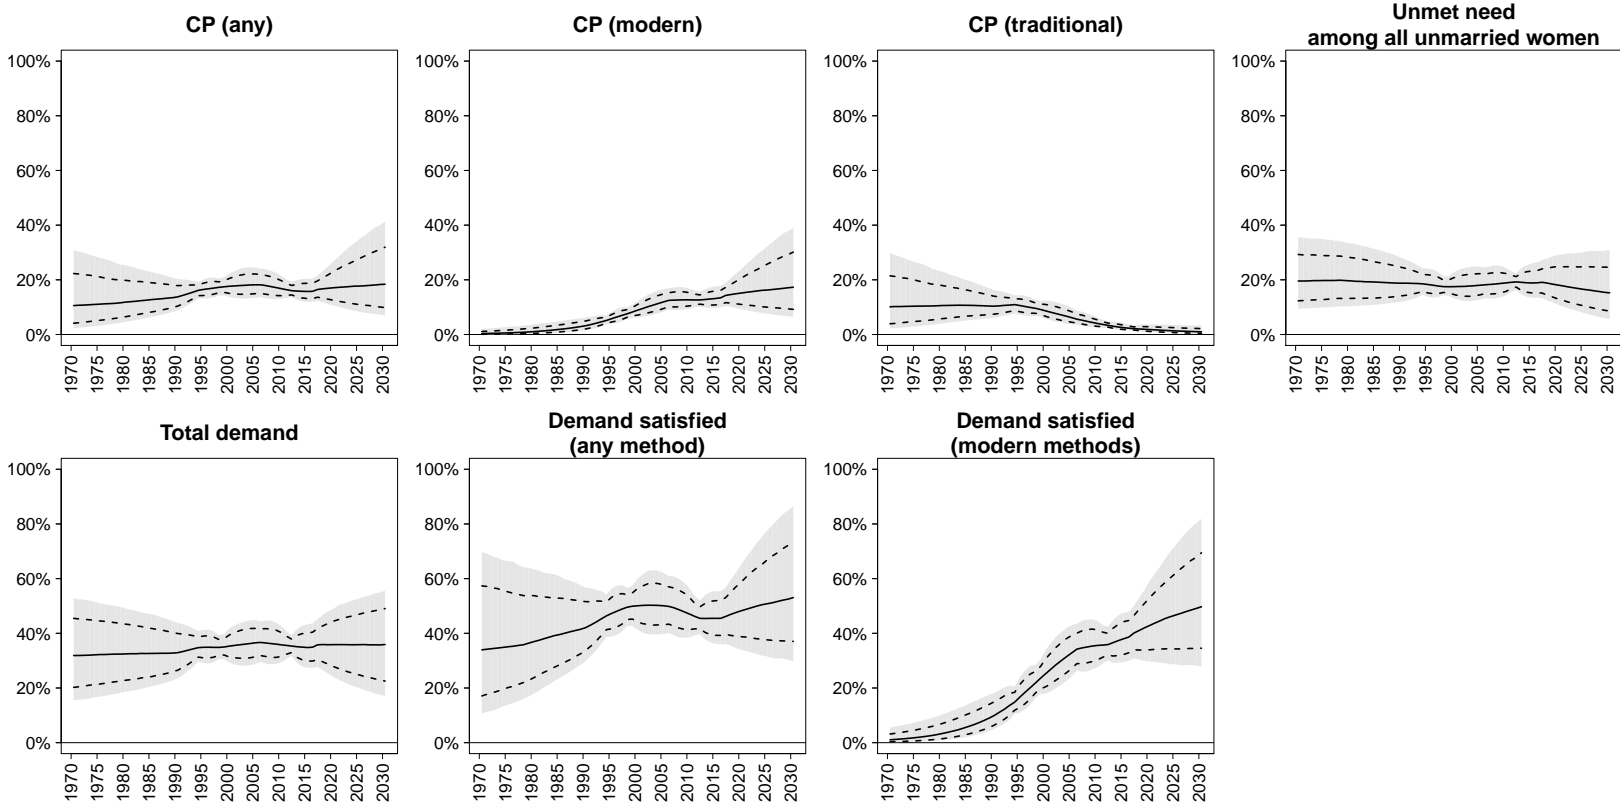

Cuba --- All women

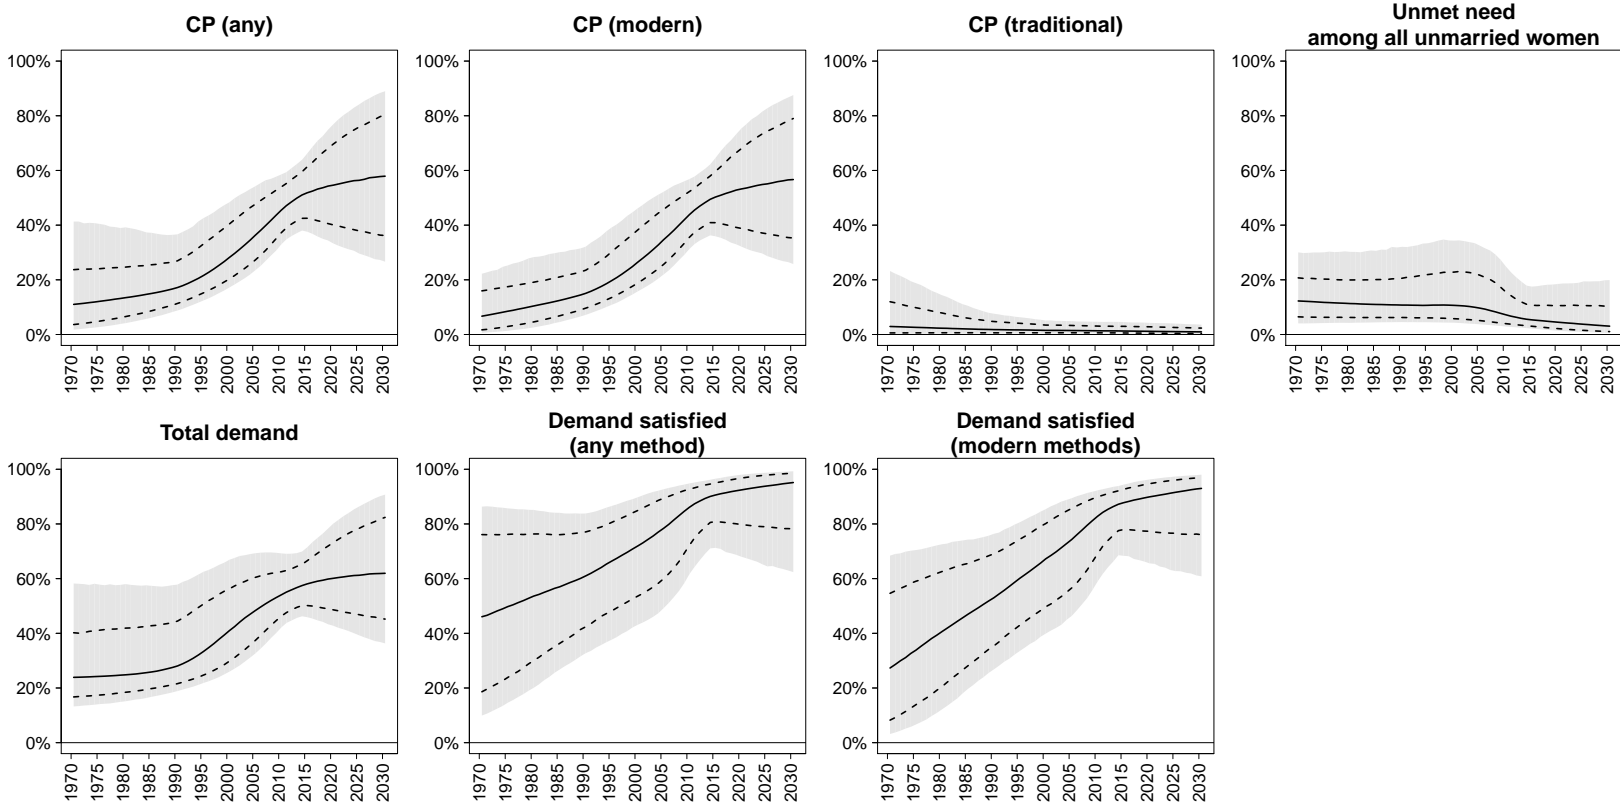

Democratic Republic of the Congo ---- All women

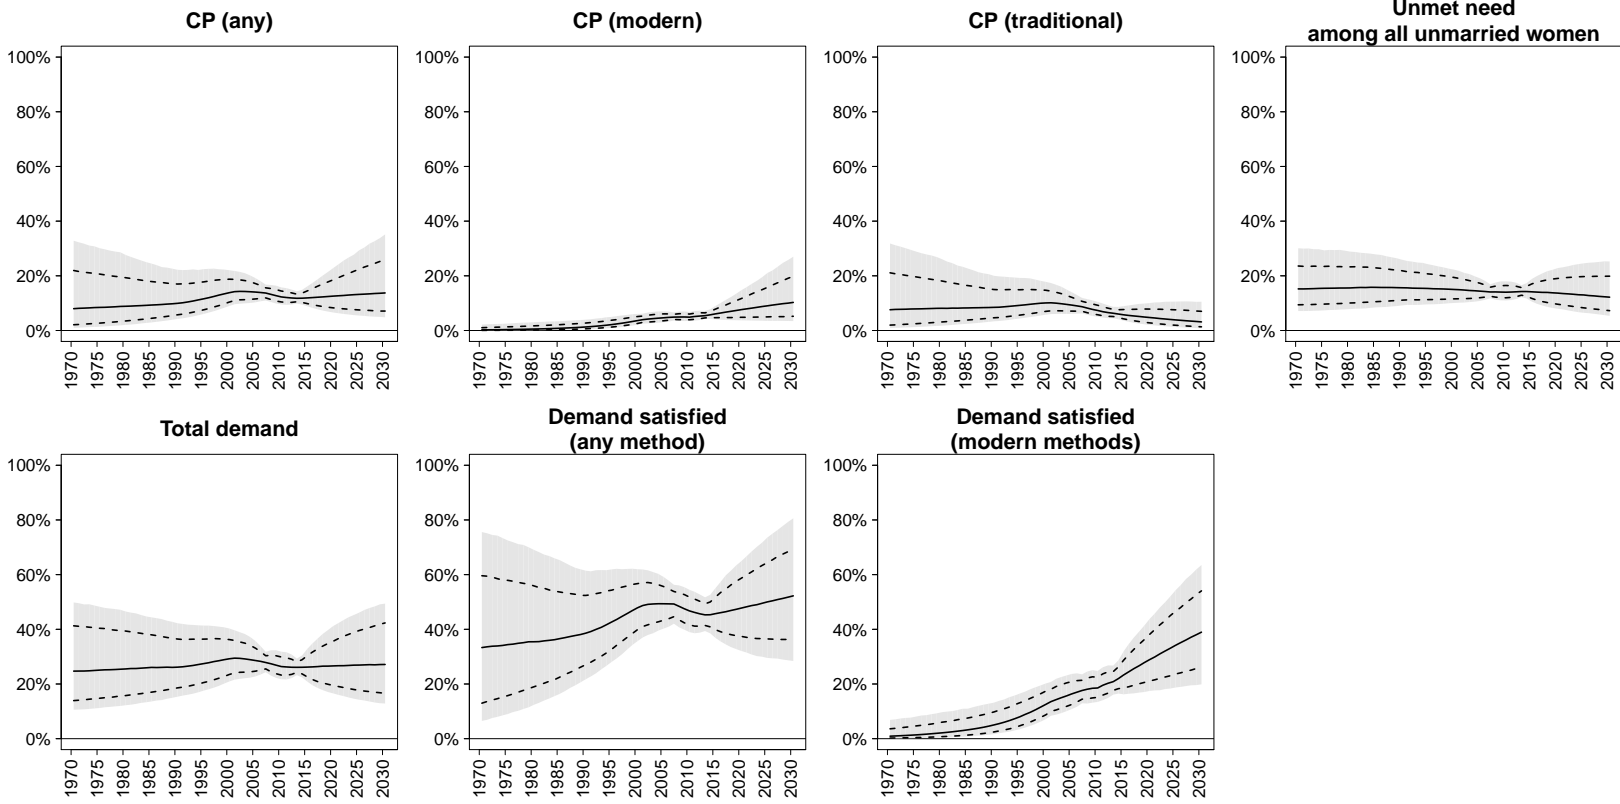

Dominican Republic --- All women

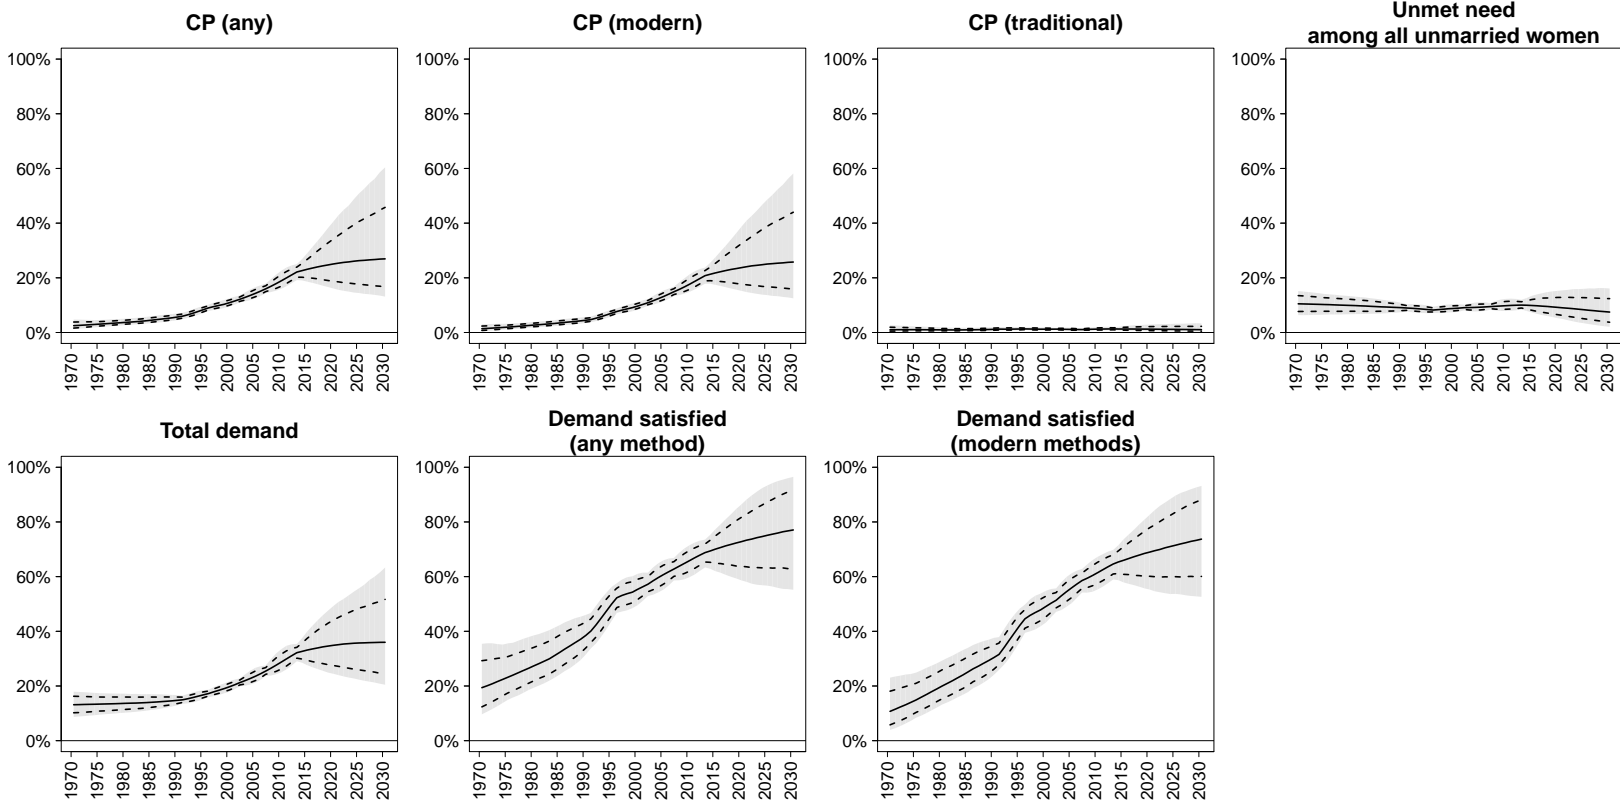

Ecuador ---- All women

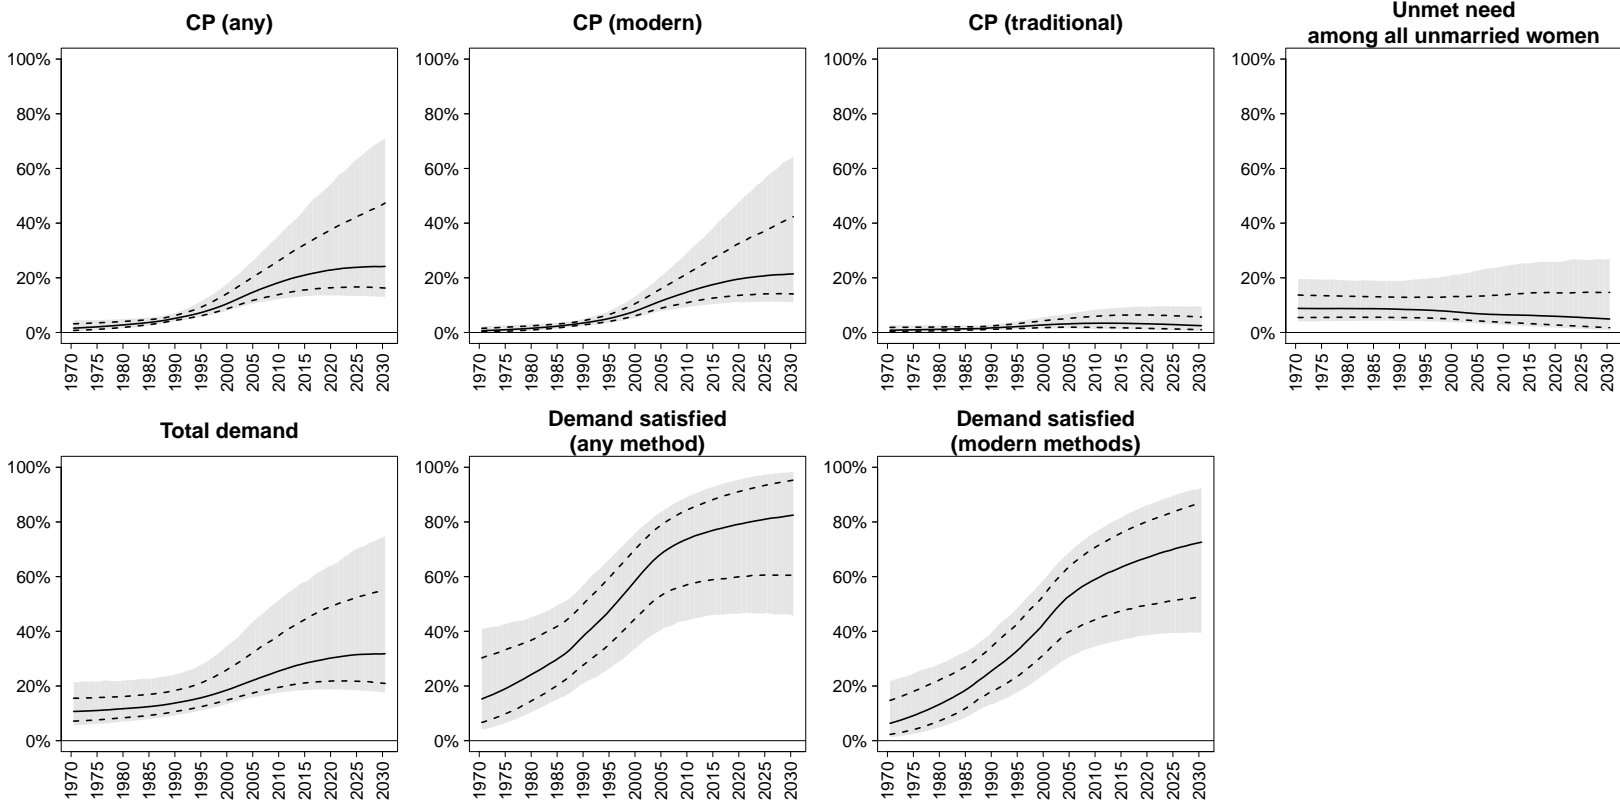

El Salvador --- All women

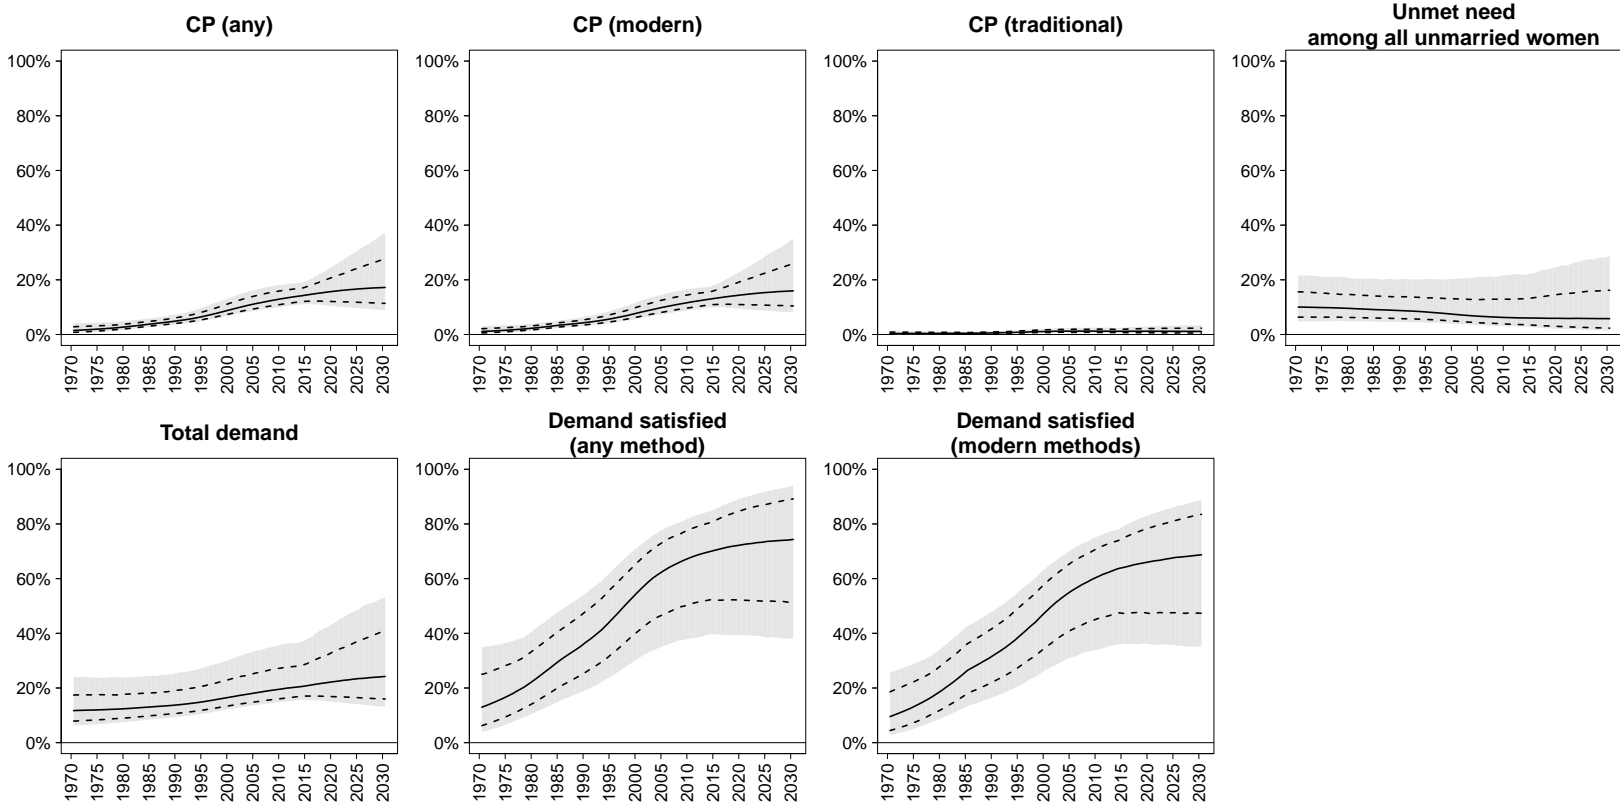



Eritrea --- All women

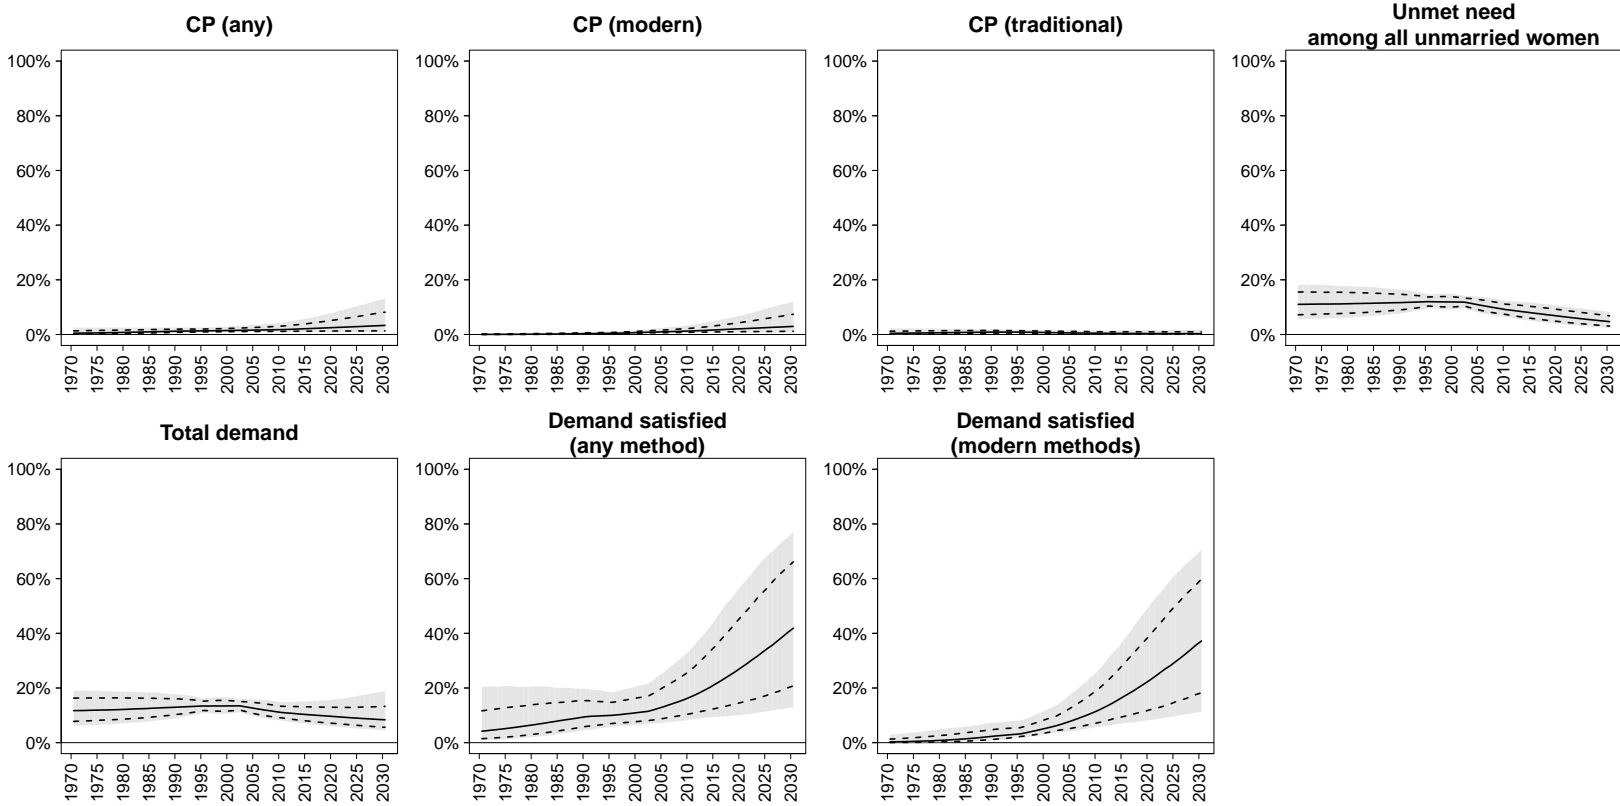

Eswatini --- All women

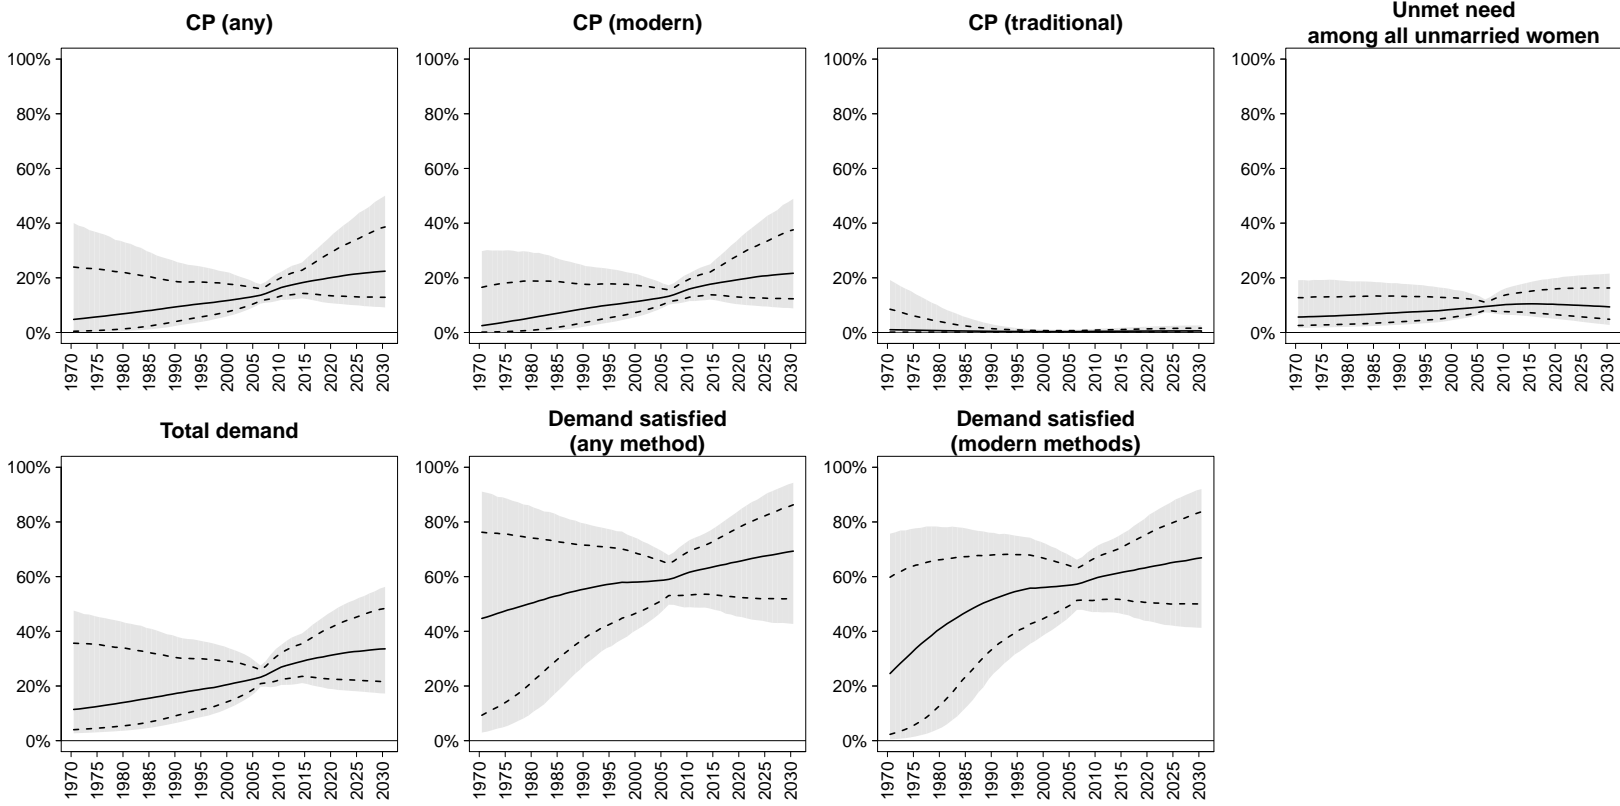

Ethiopia --- All women

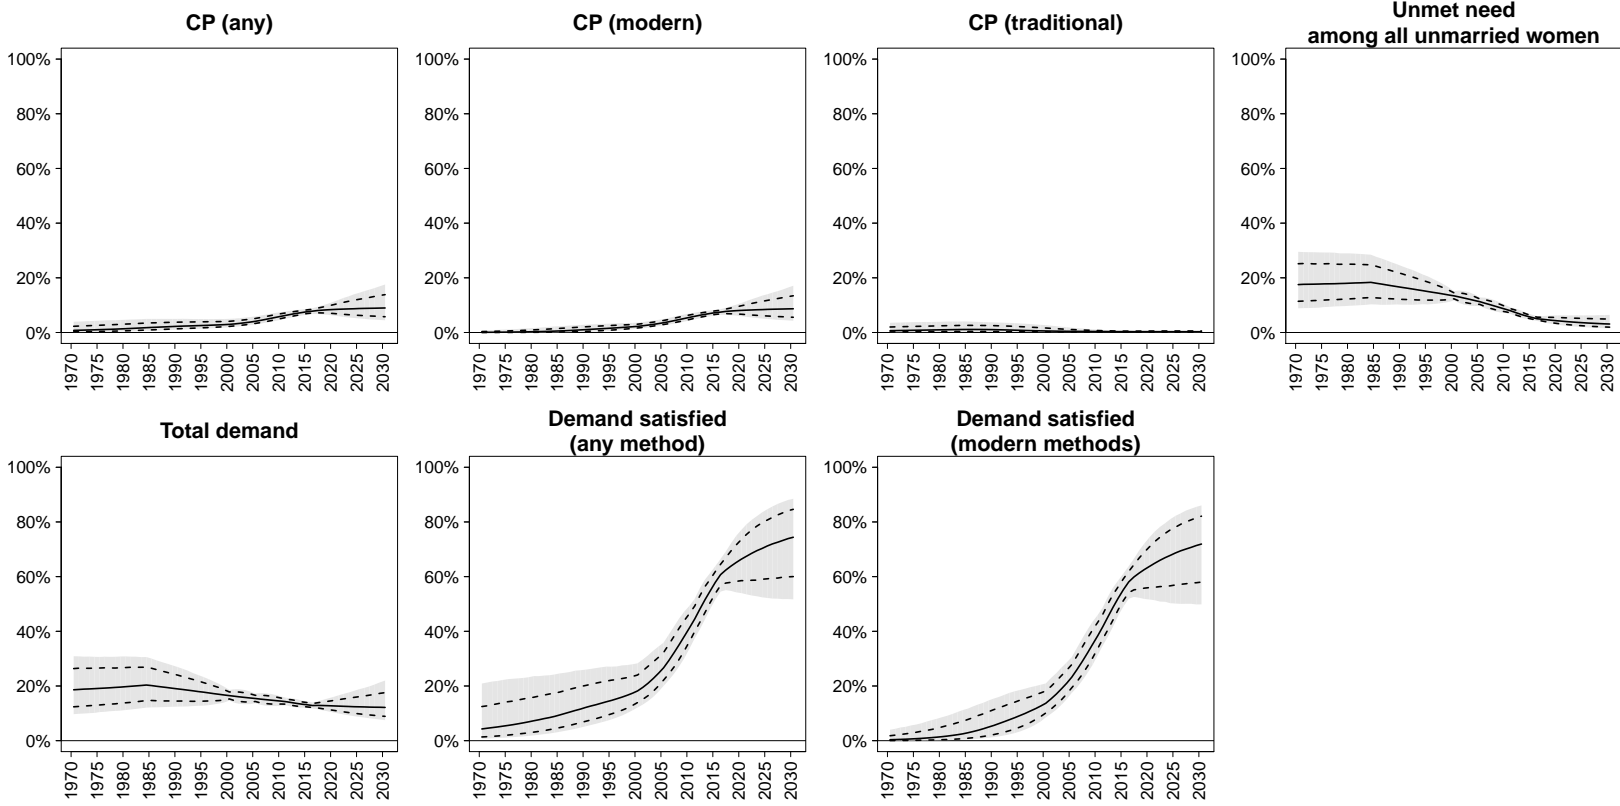

Gabon --- All women

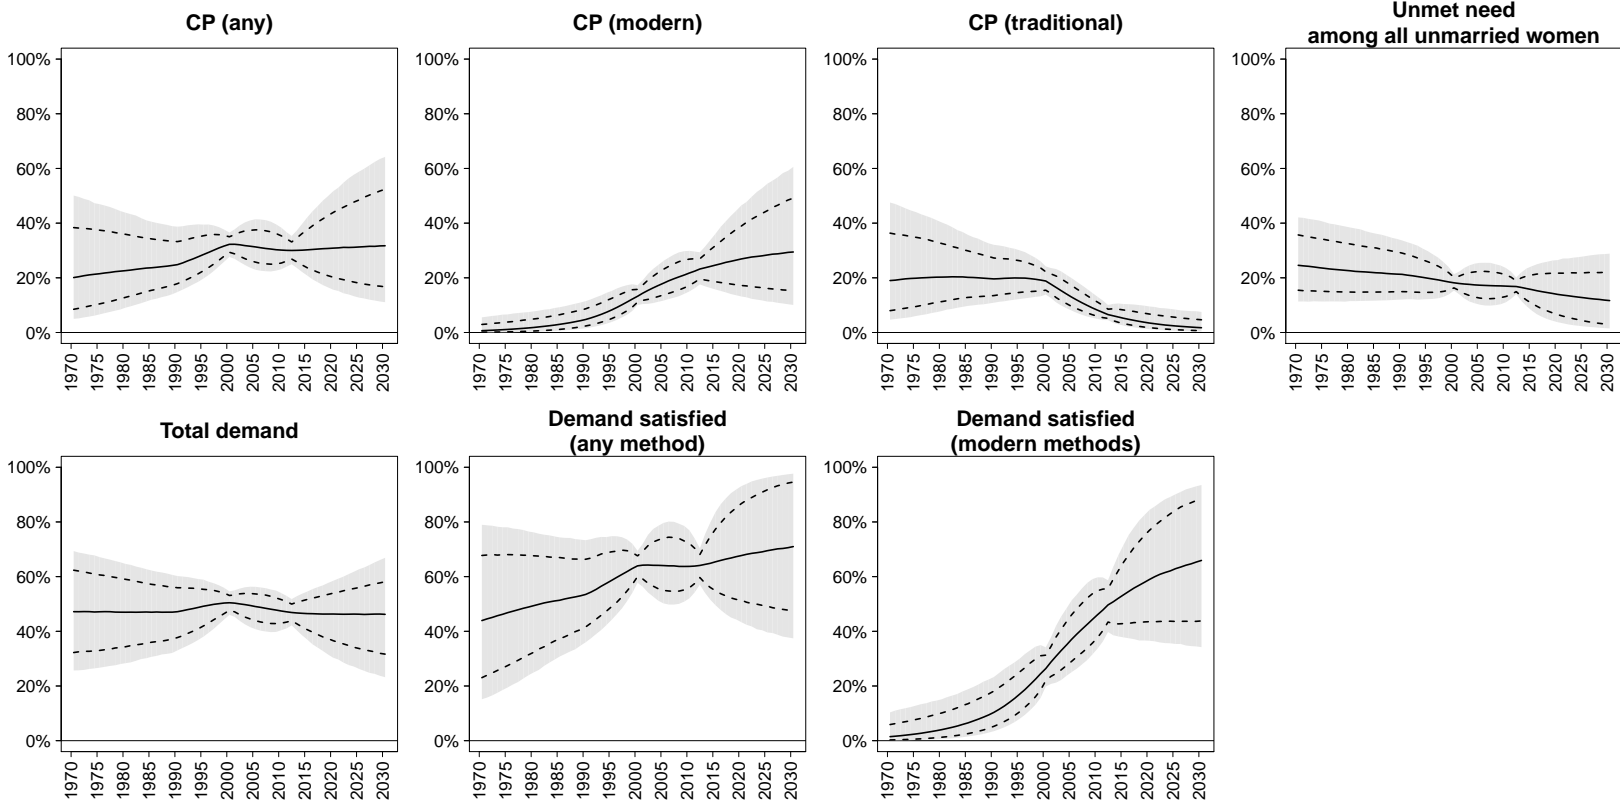

Gambia ---- All women

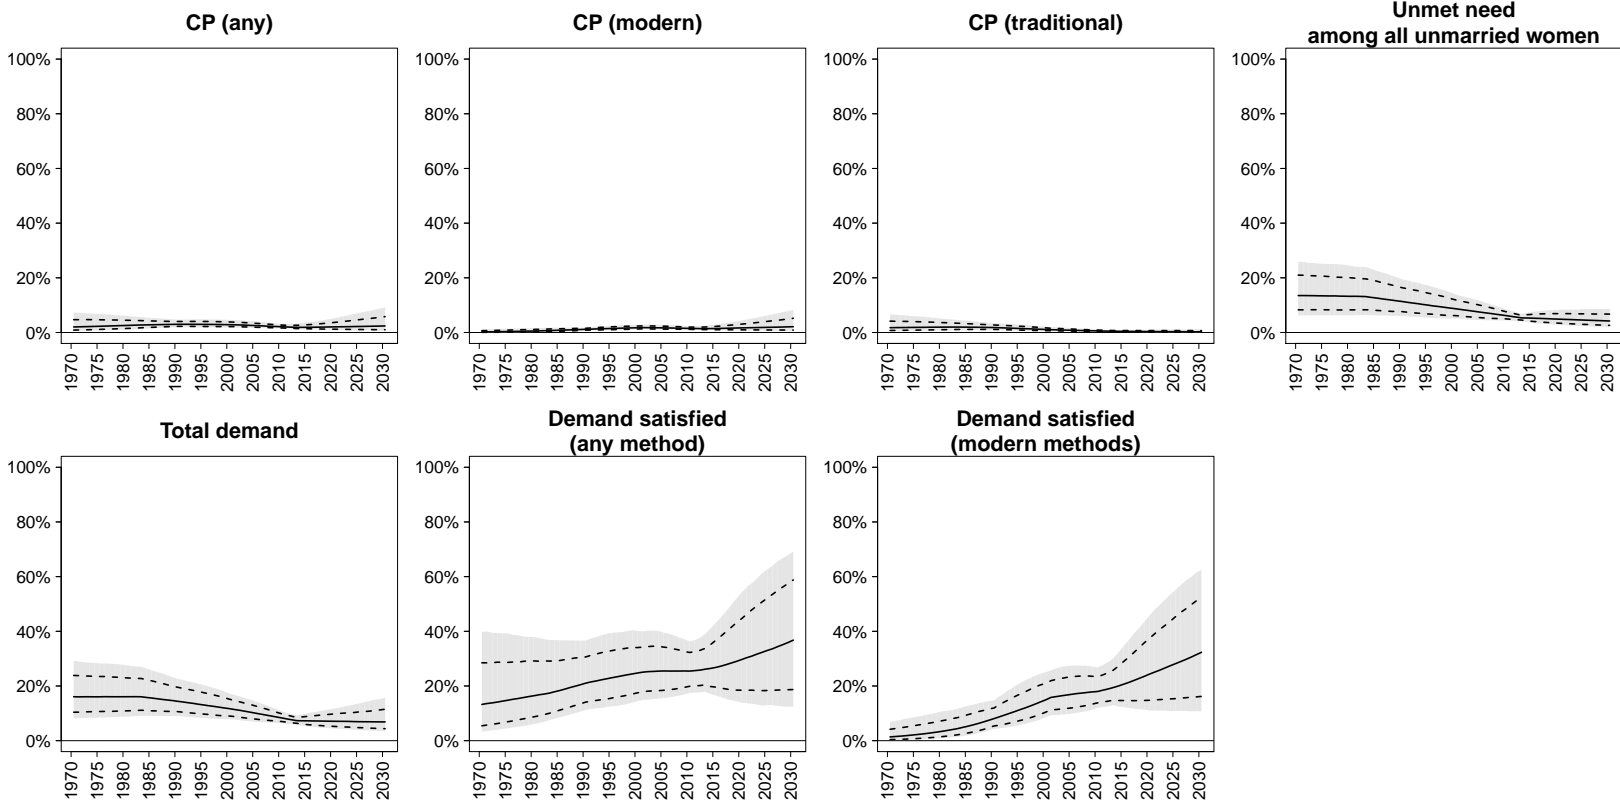

Ghana --- All women

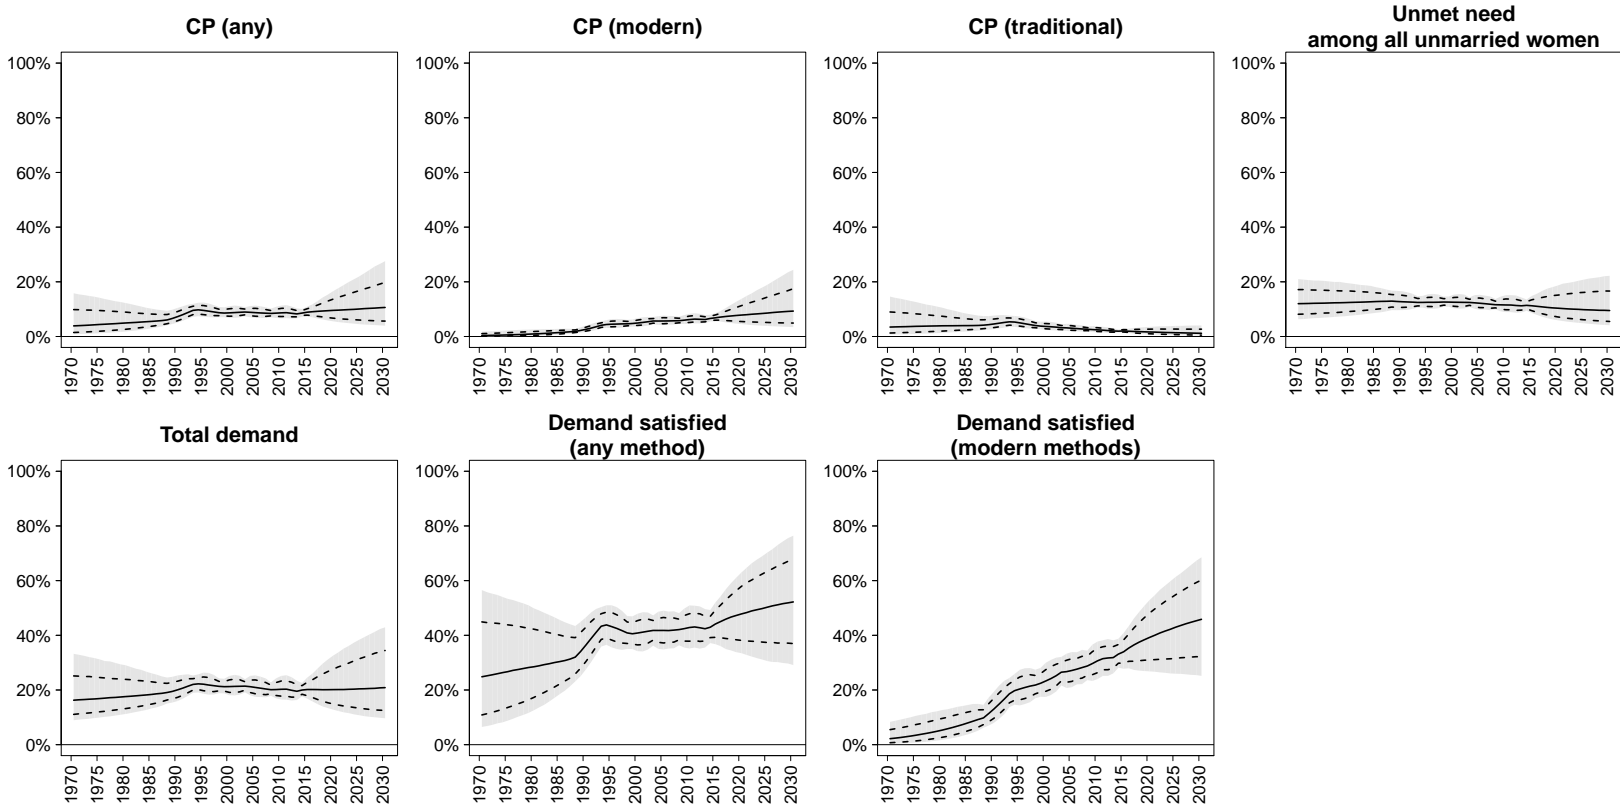

Guatemala --- All women

CP (any)

CP (modern)

CP (traditional)

Unmet need among all unmarried women

Total demand

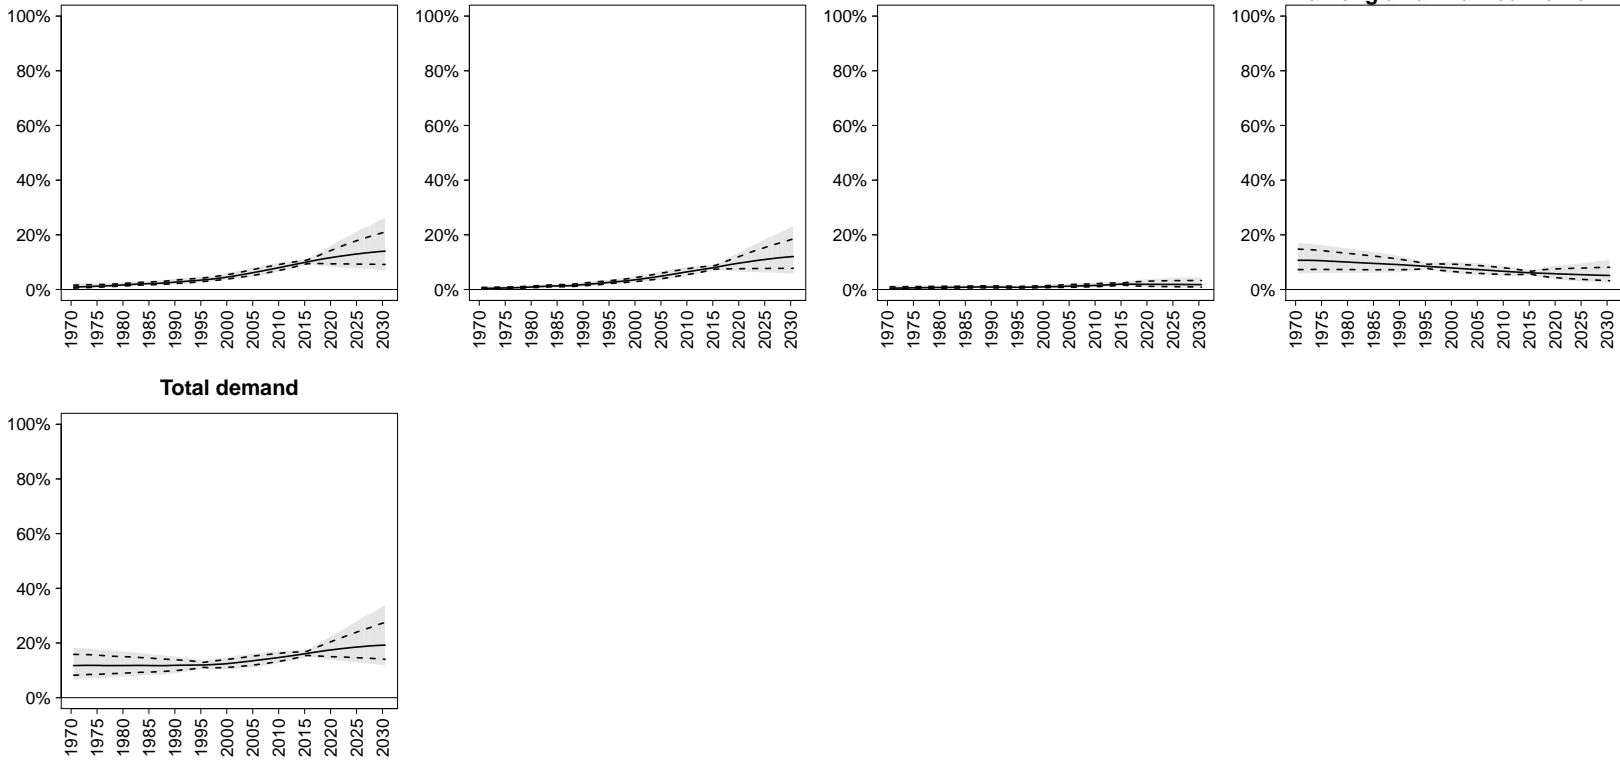

Guinea ---- All women

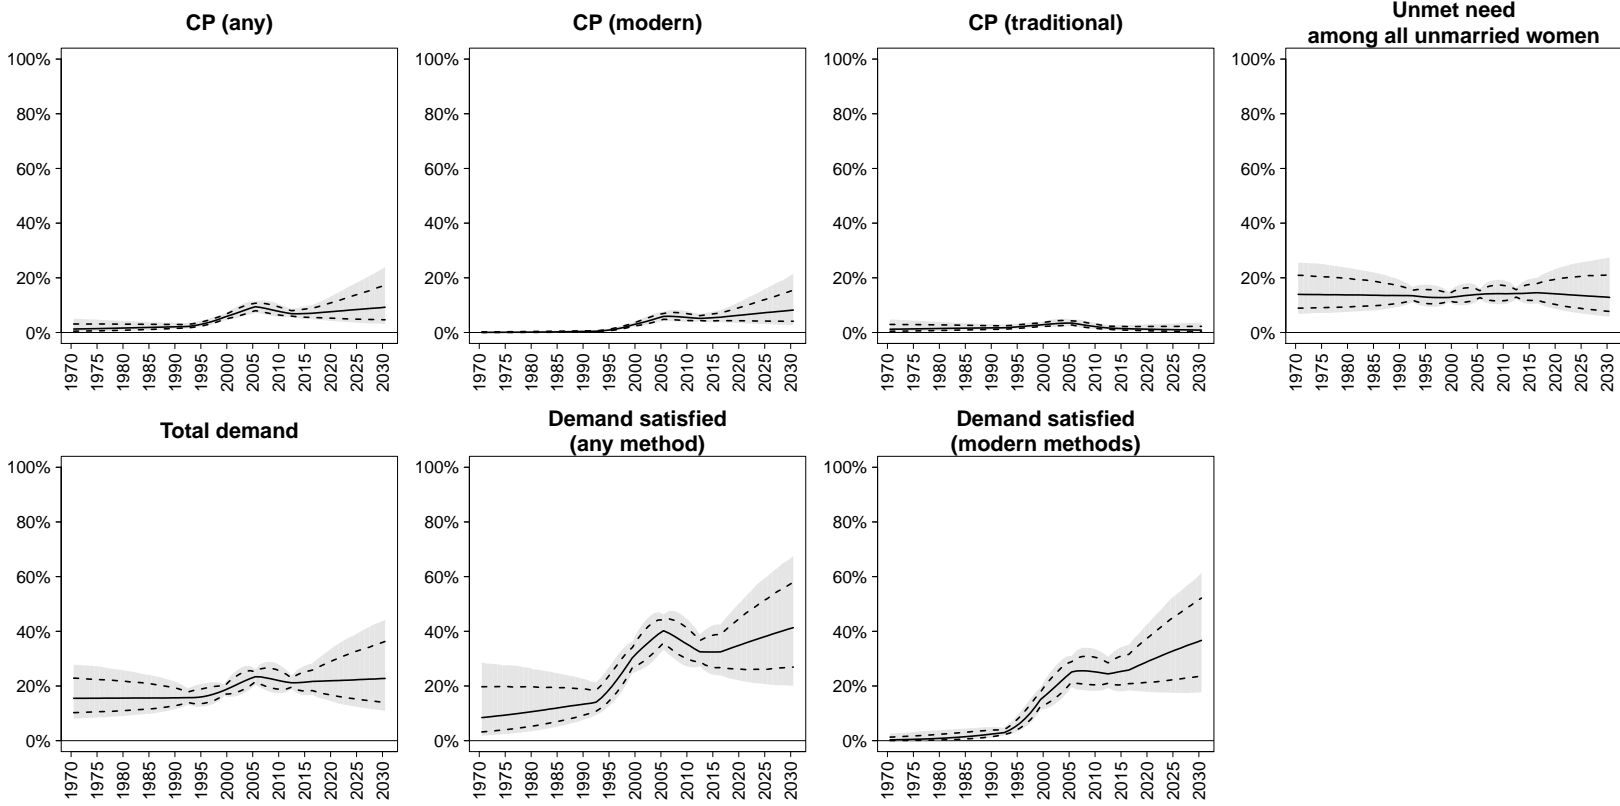



Guinea-Bissau --- All women

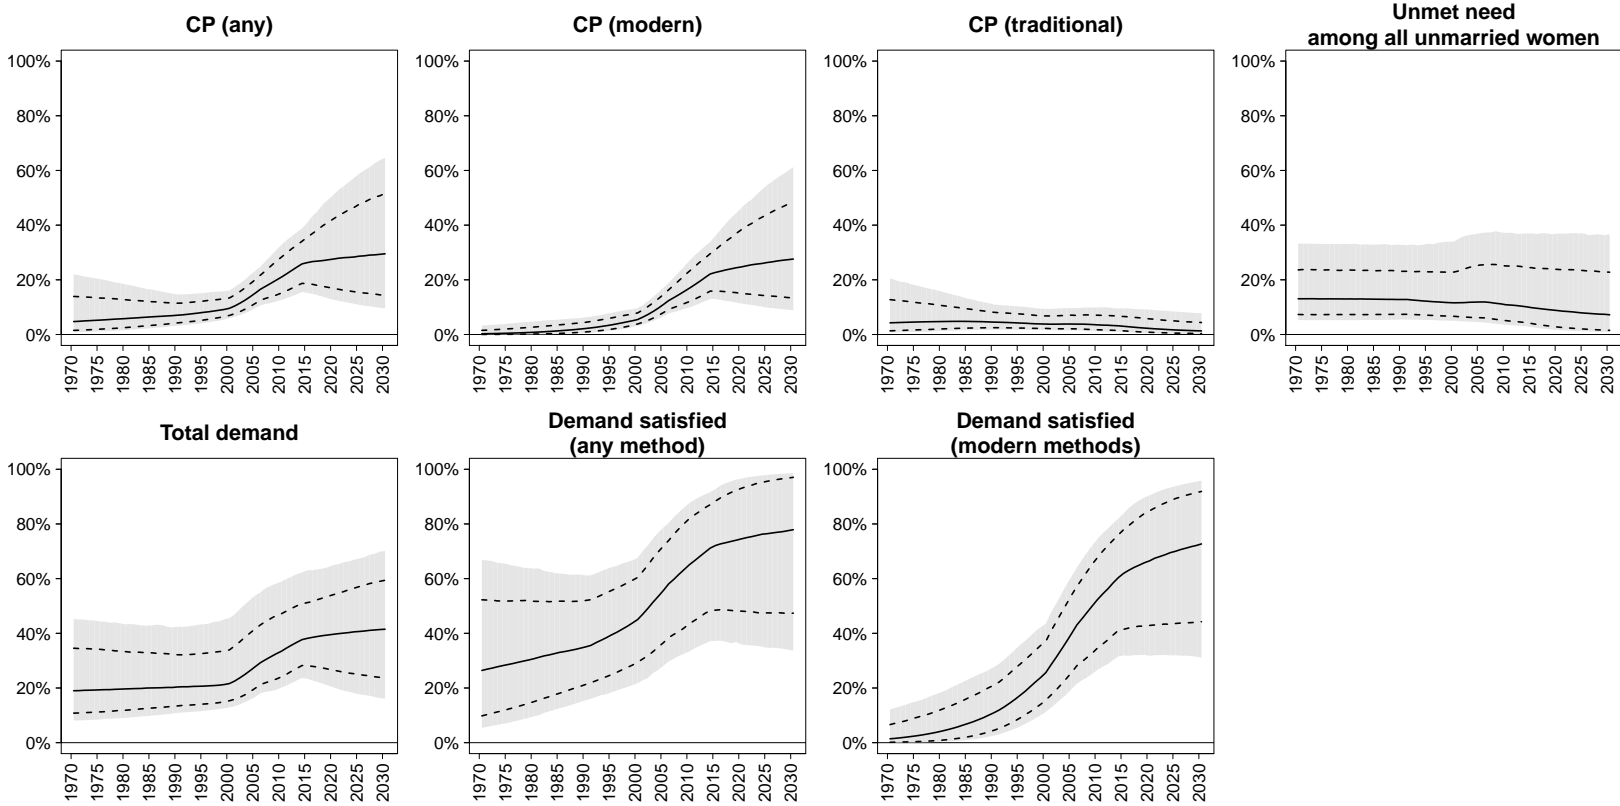

Guyana --- All women

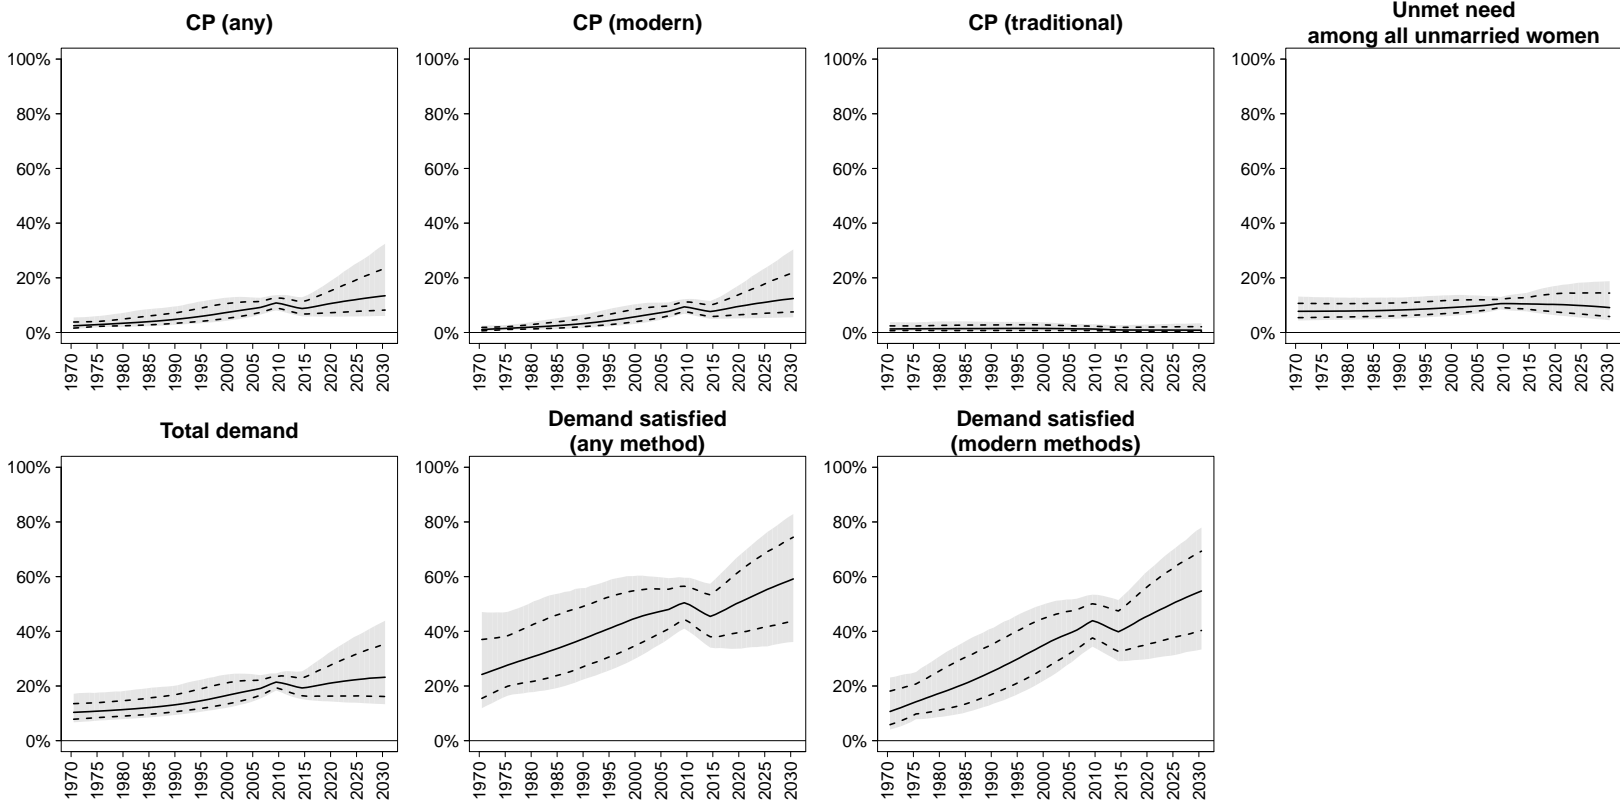

Haiti --- All women

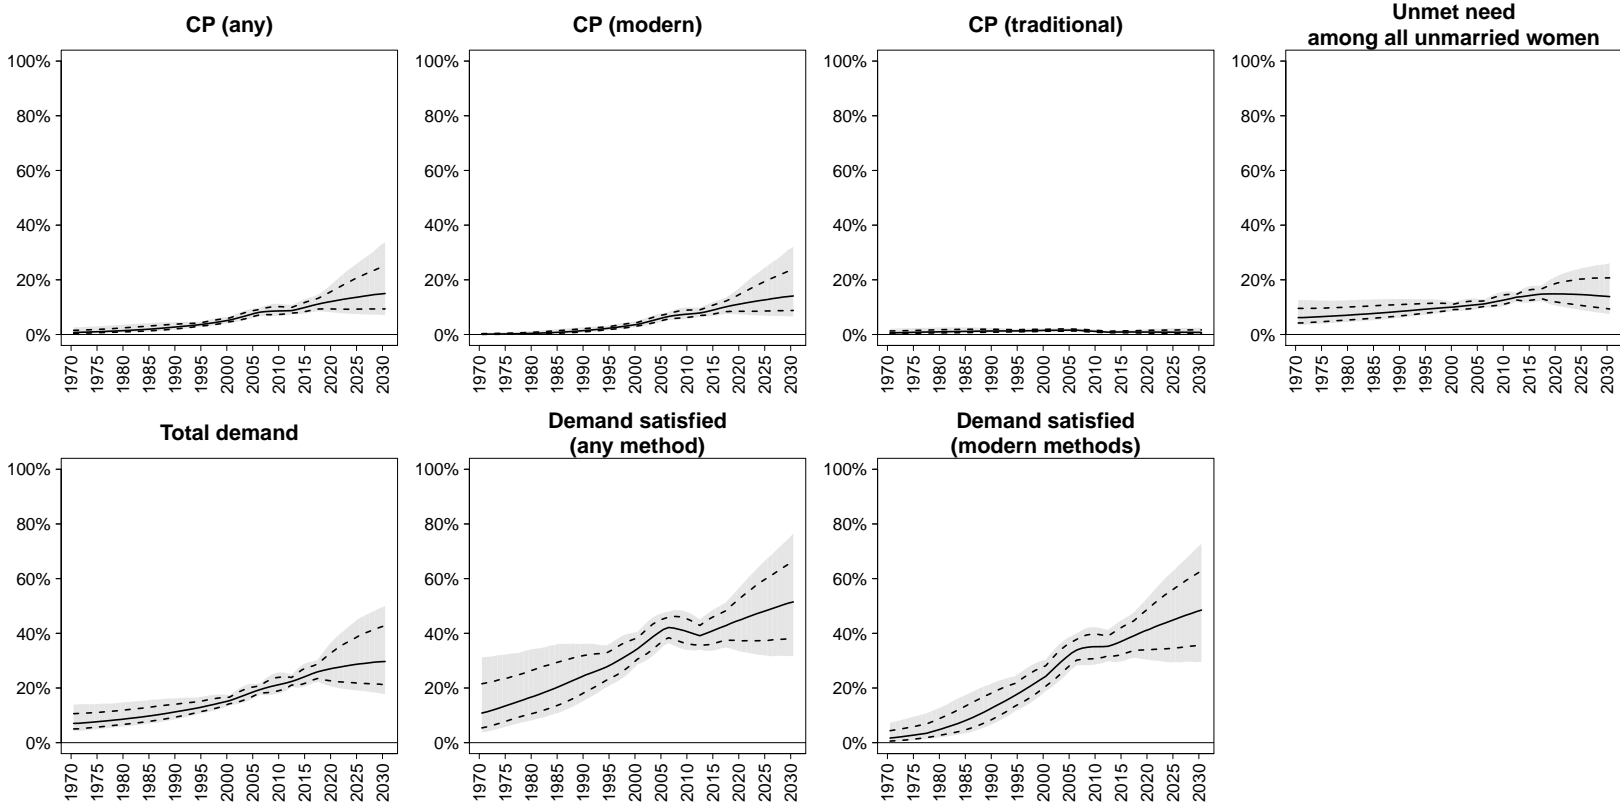

Honduras --- All women

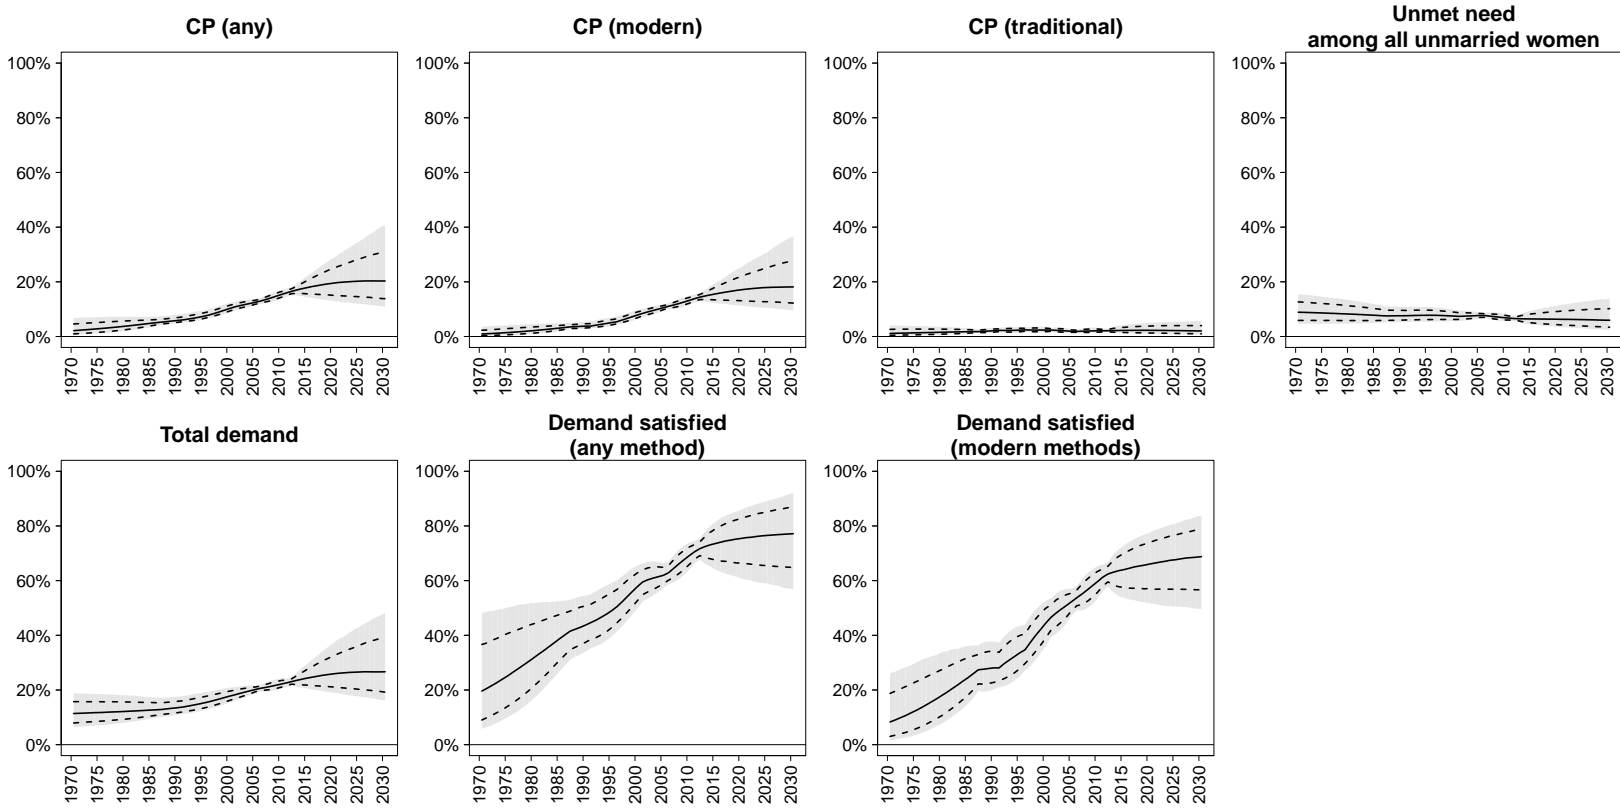

India --- All women

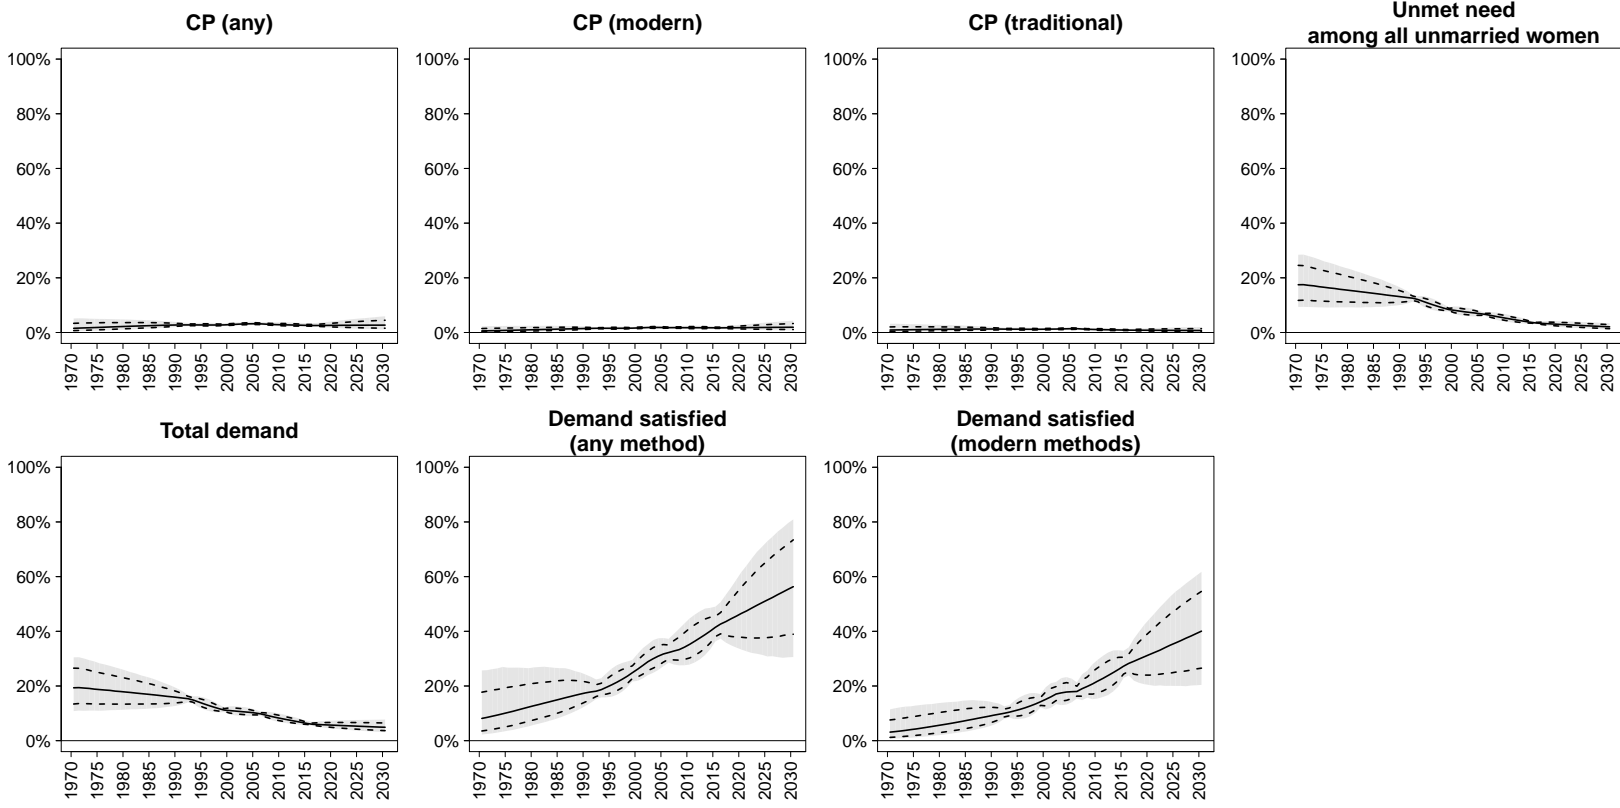

Indonesia --- All women

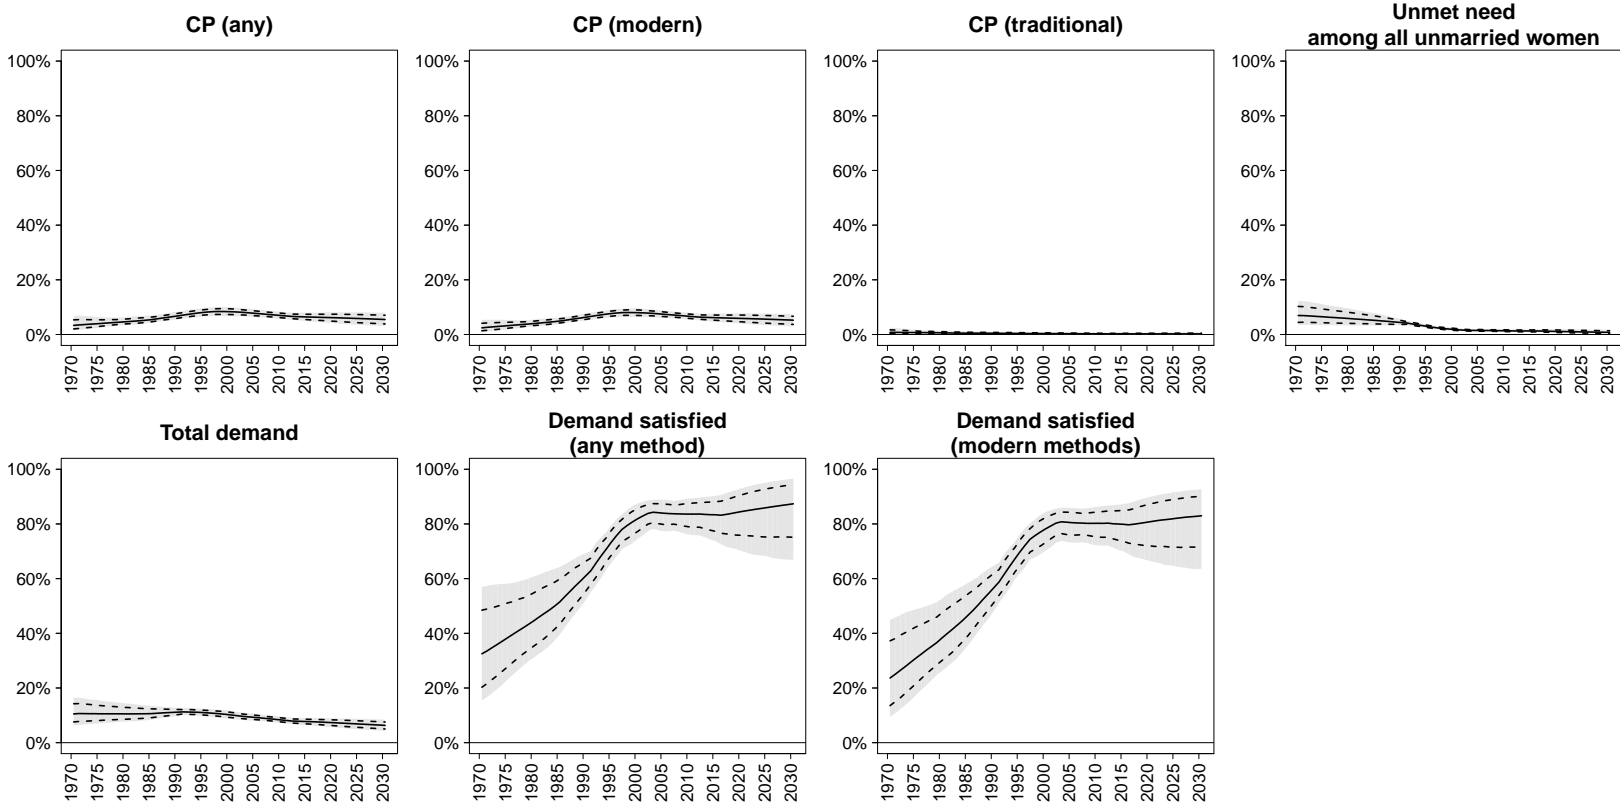

Jamaica --- All women

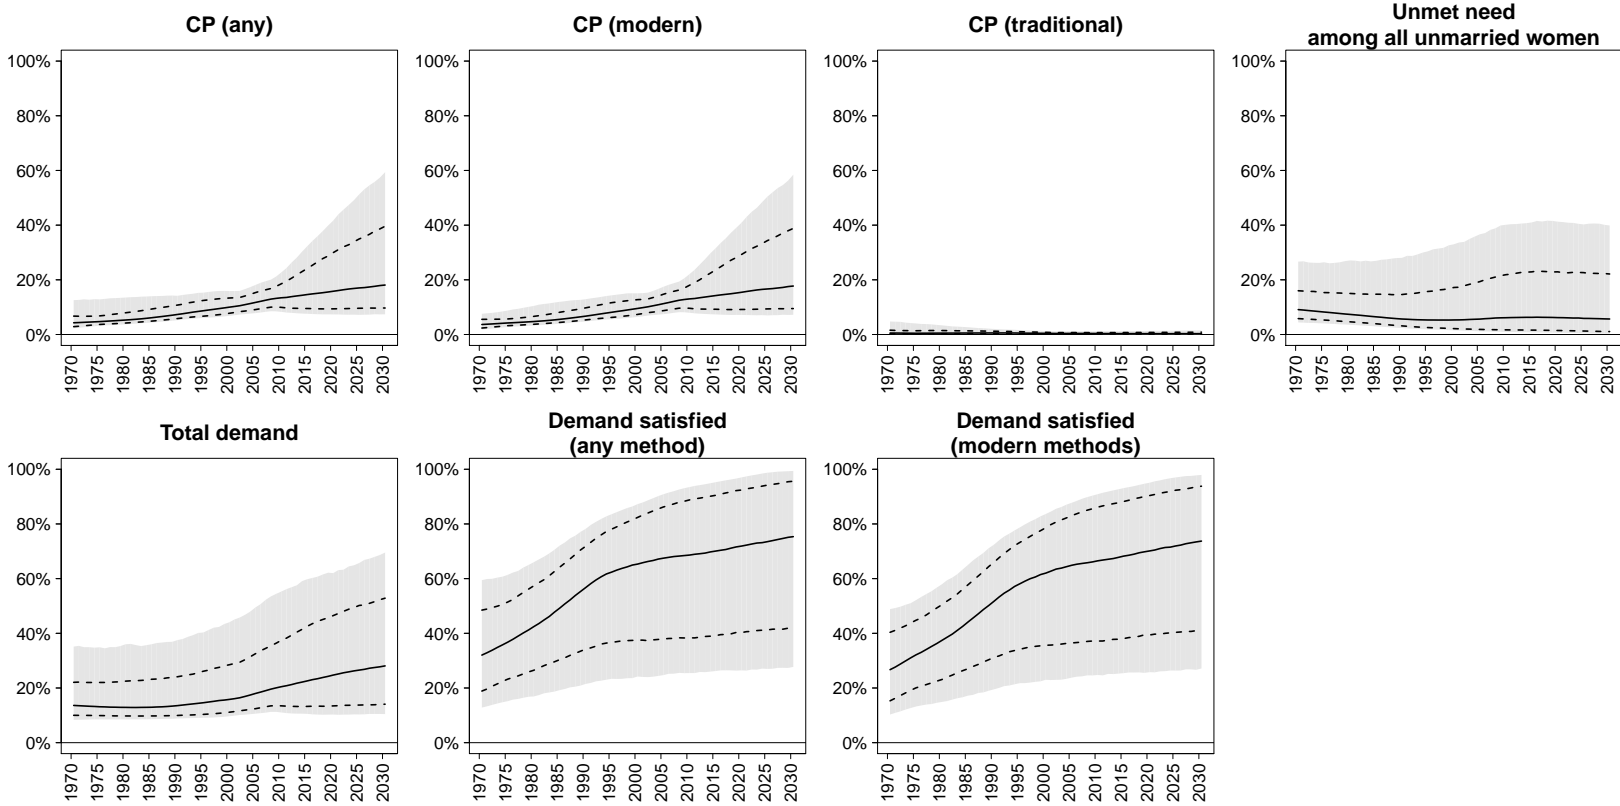

Kazakhstan --- All women

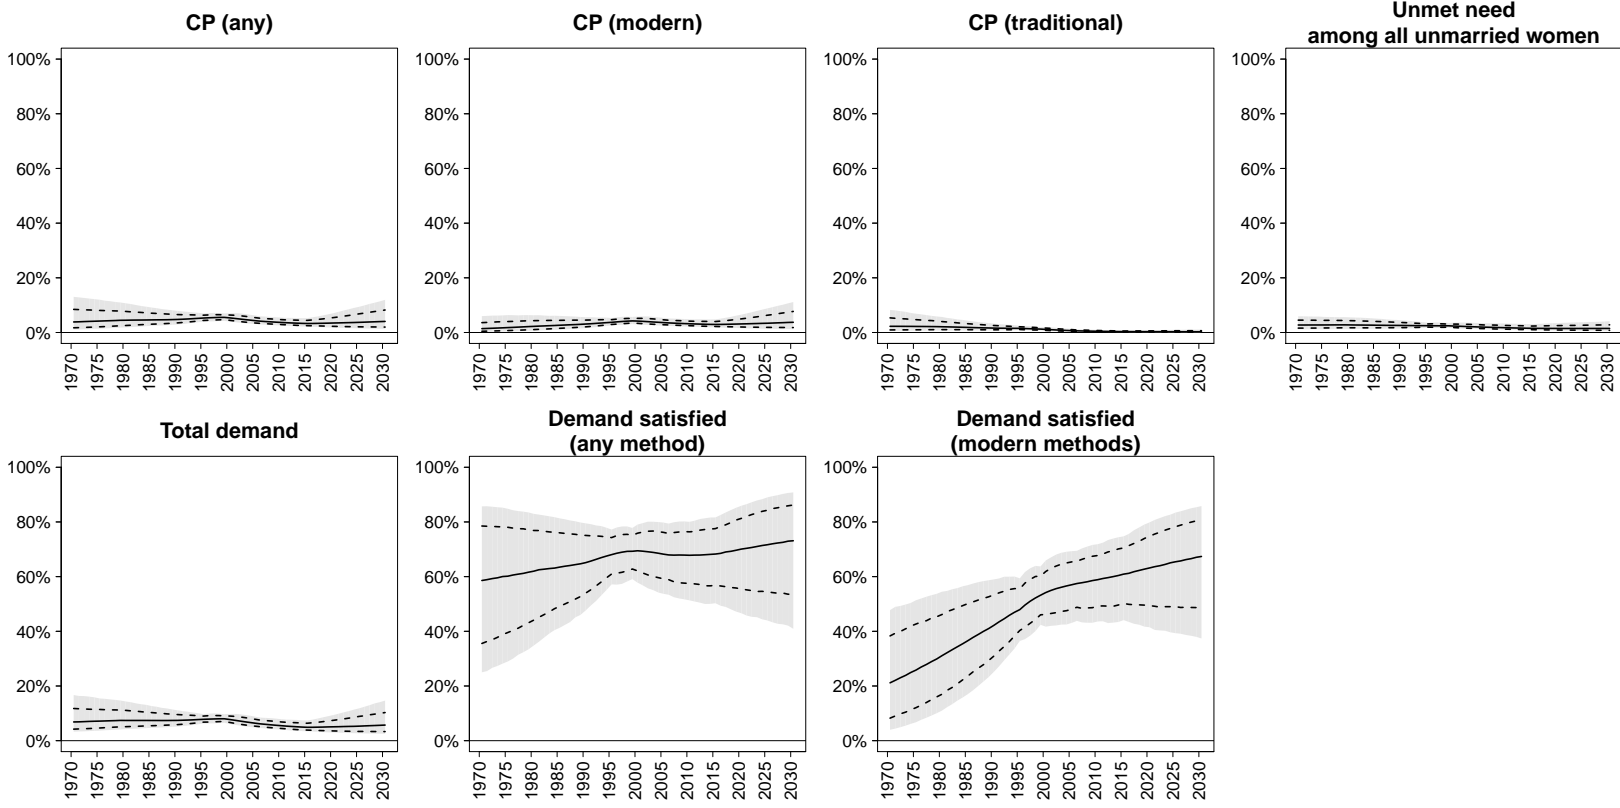



Kenya --- All women

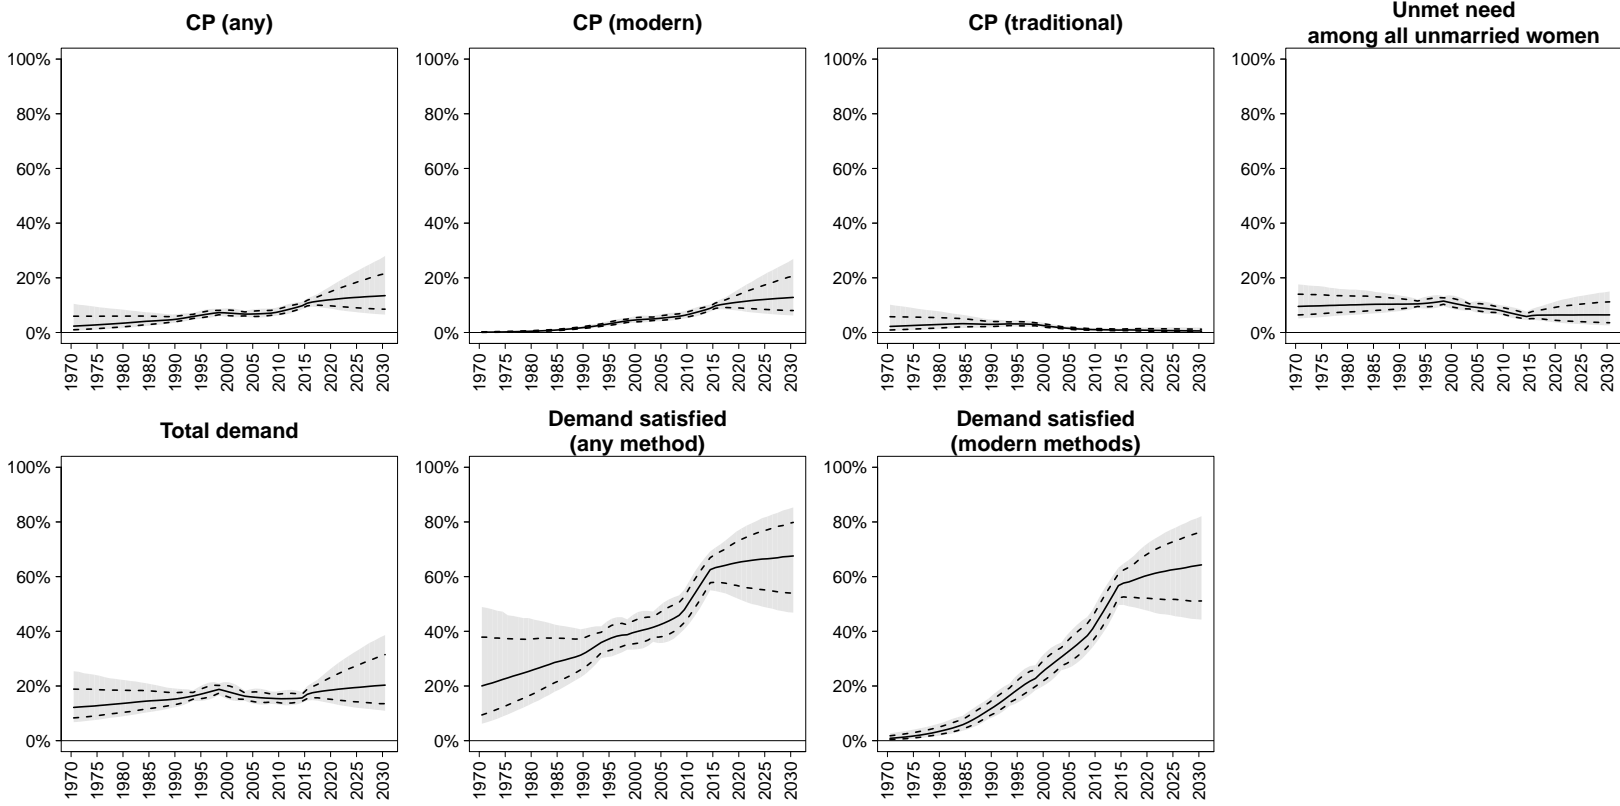

Kyrgyzstan --- All women

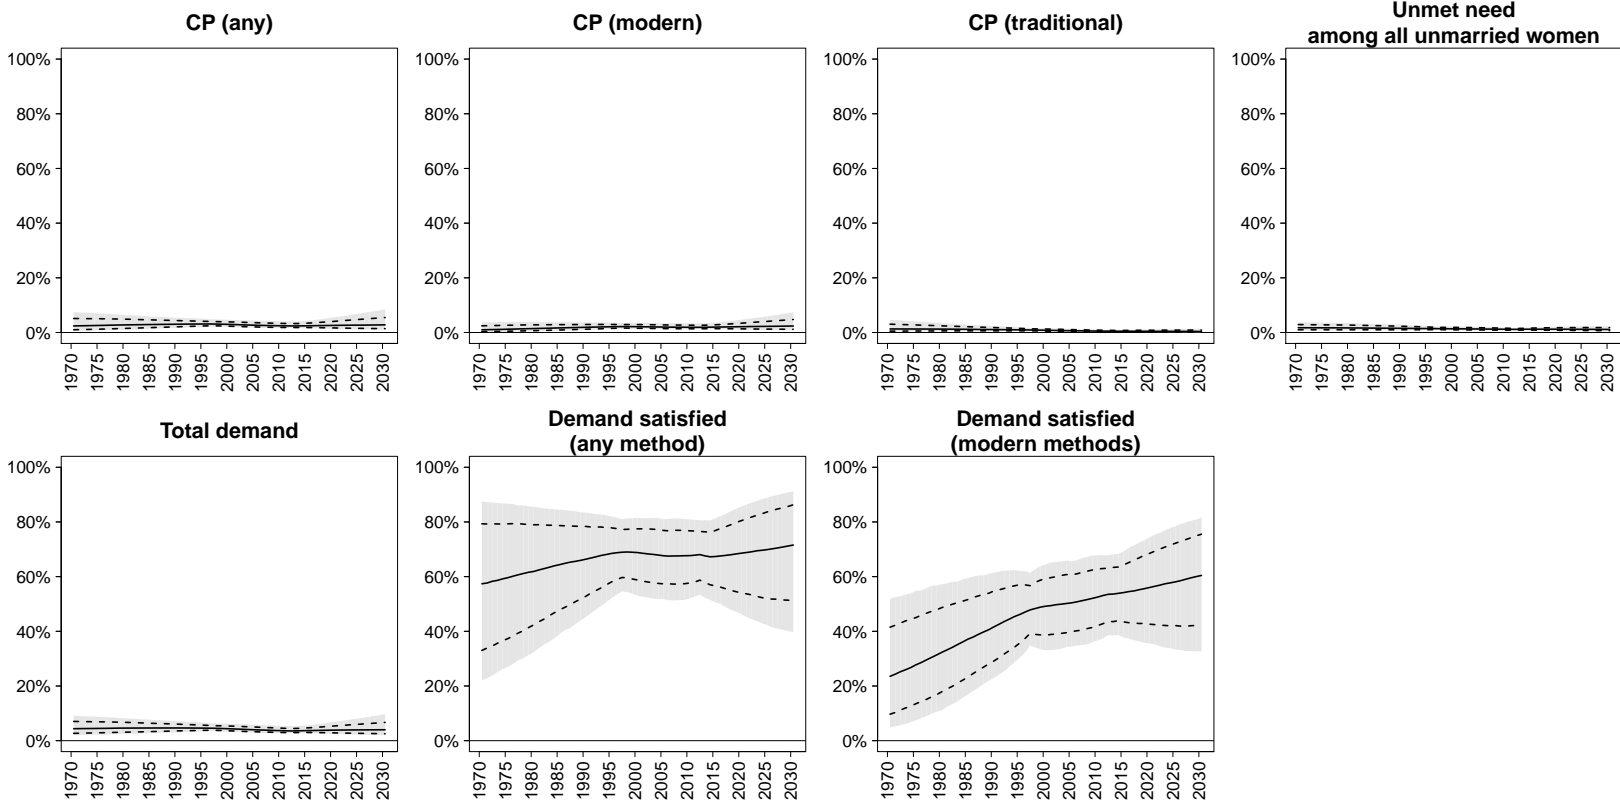

Lesotho ---- All women

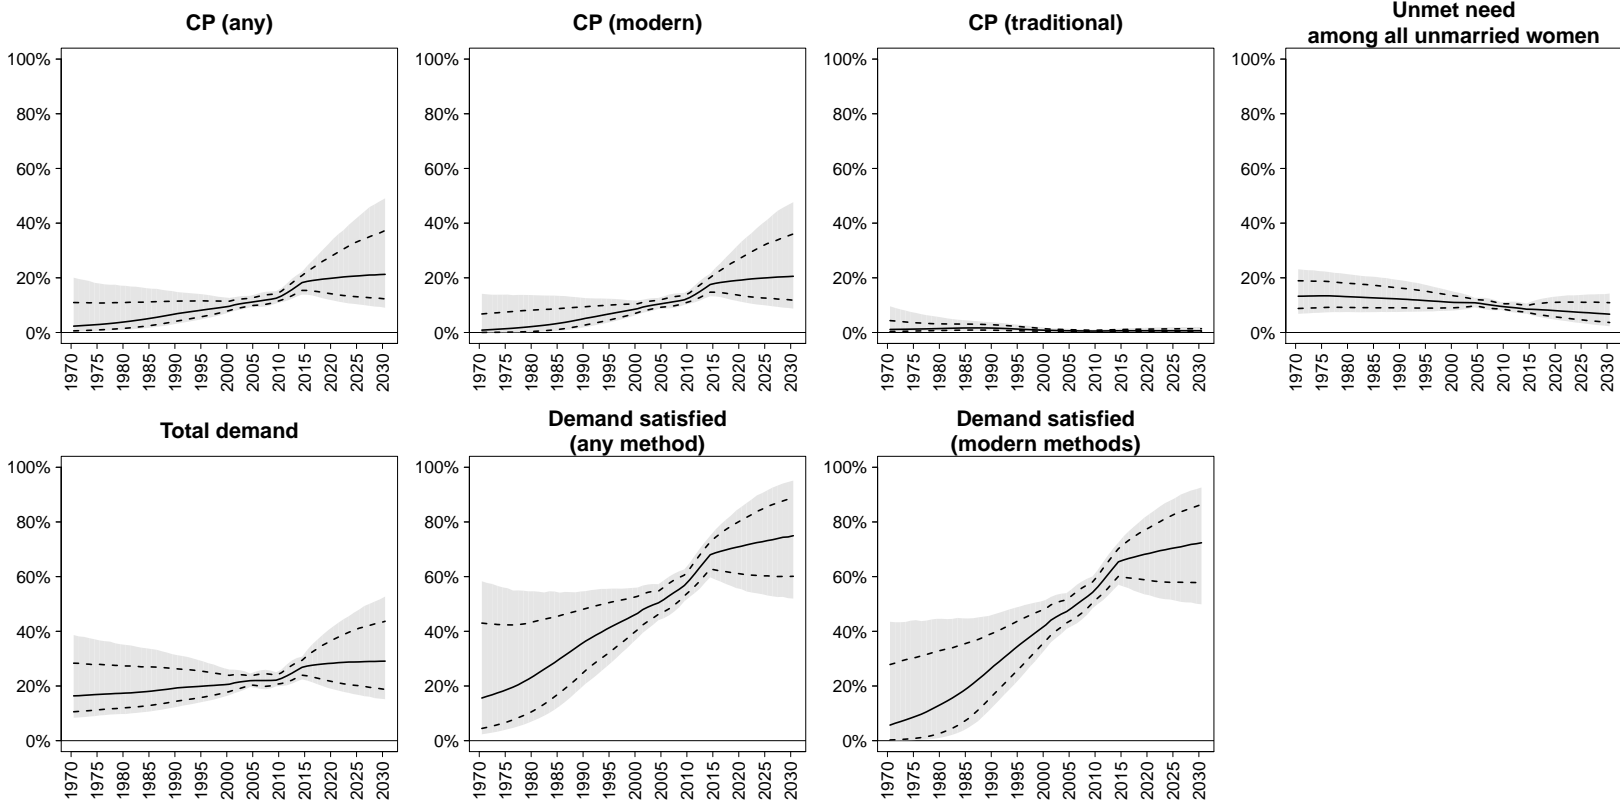

Liberia --- All women

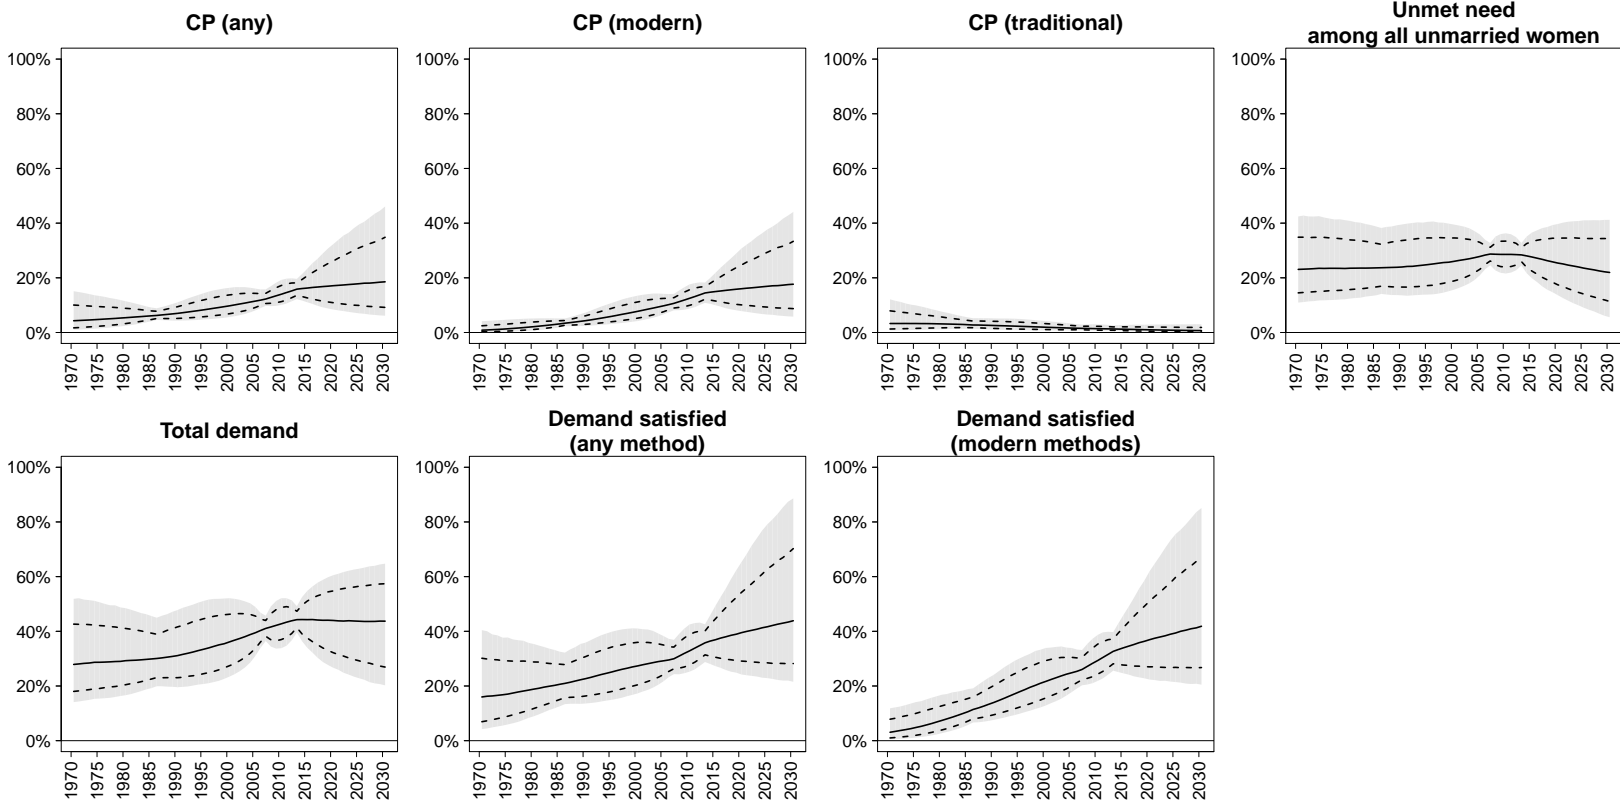

Madagascar --- All women

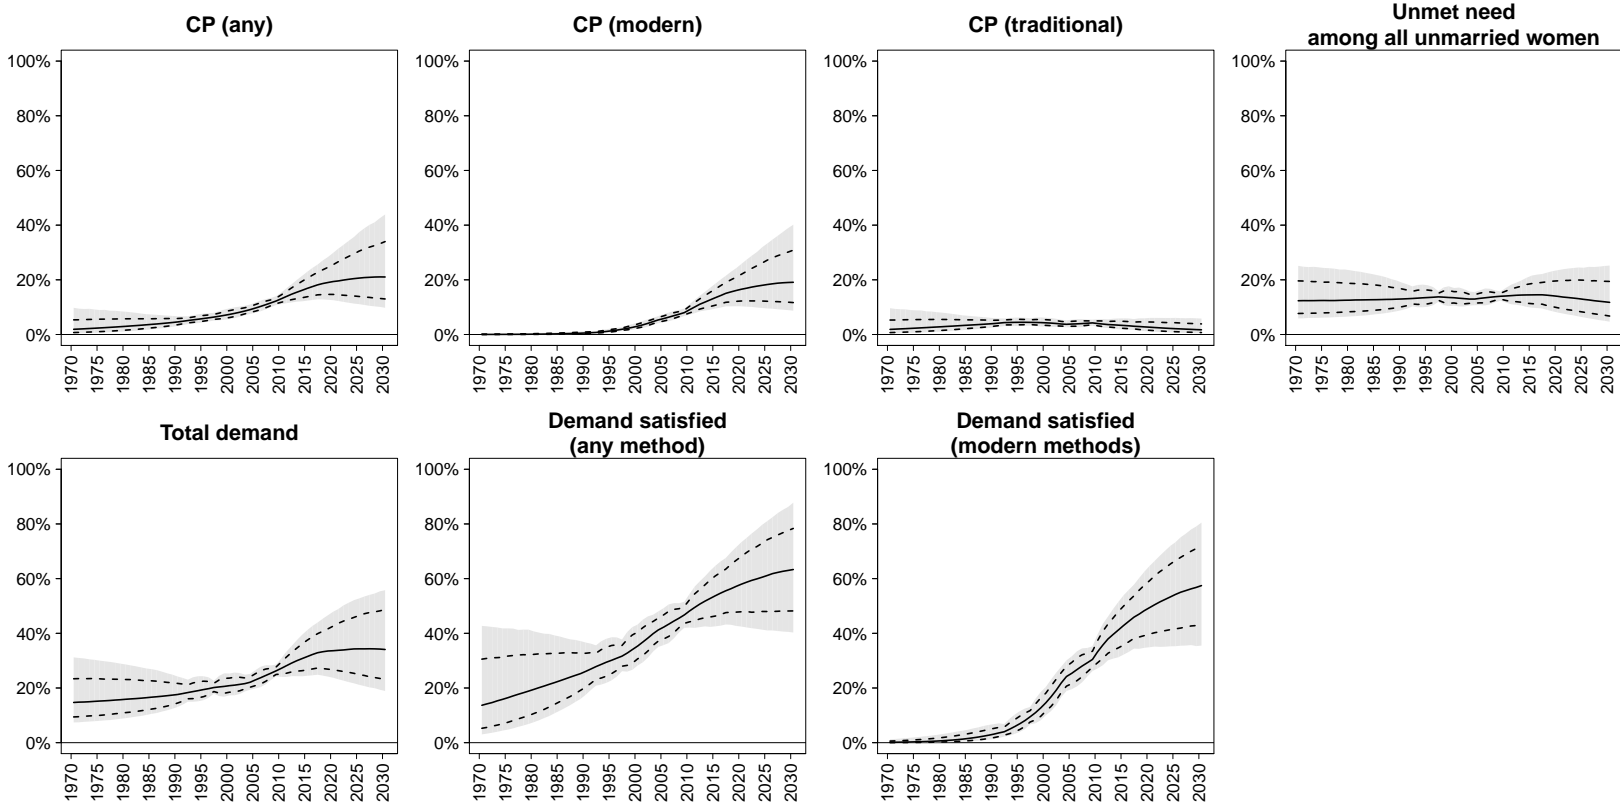

Malawi --- All women

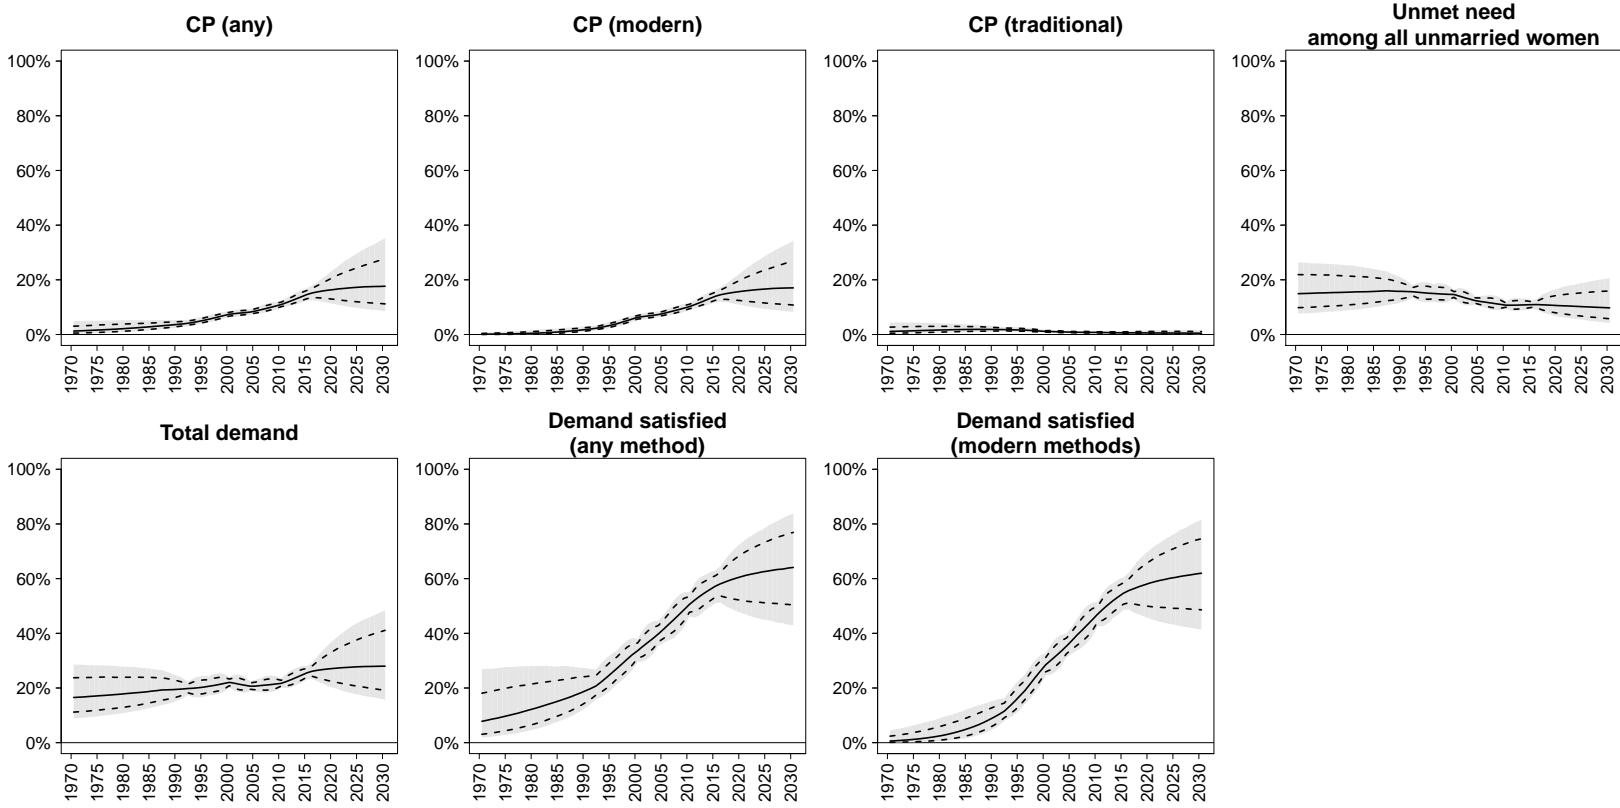

Mali --- All women

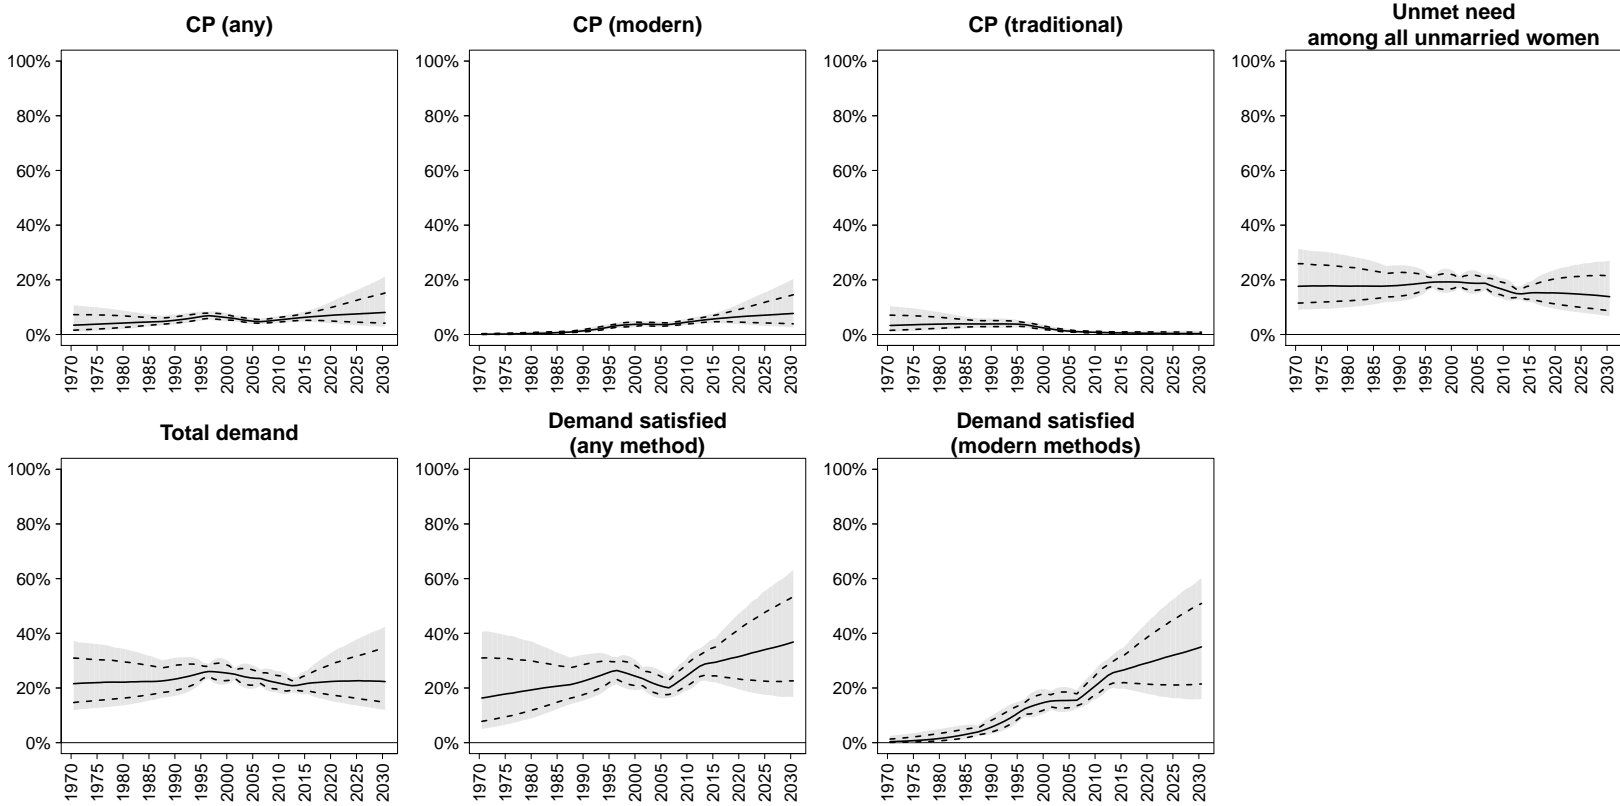

Mexico --- All women

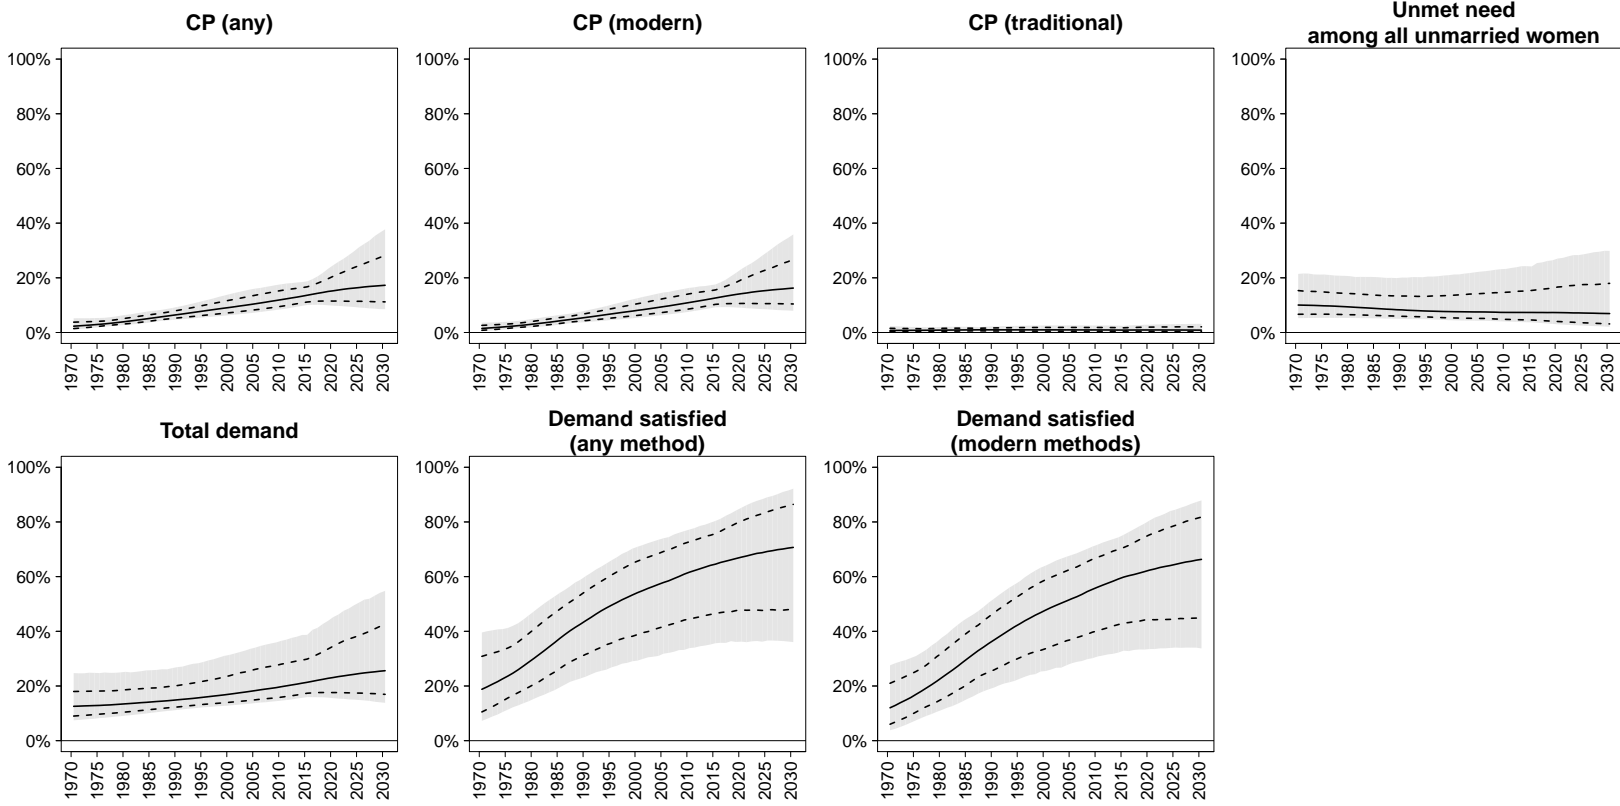



Mongolia --- All women

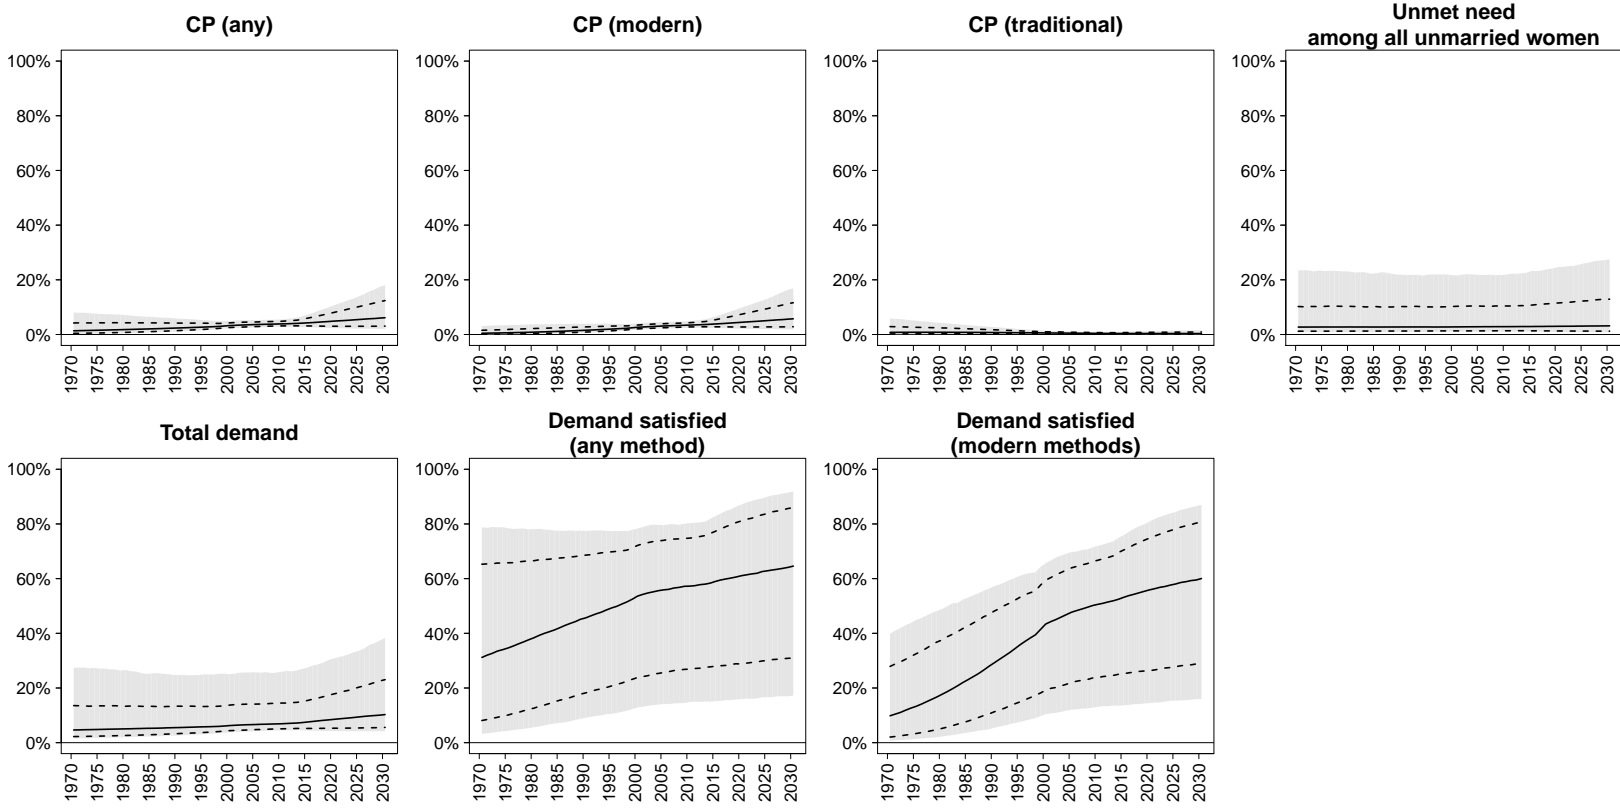

Mozambique --- All women

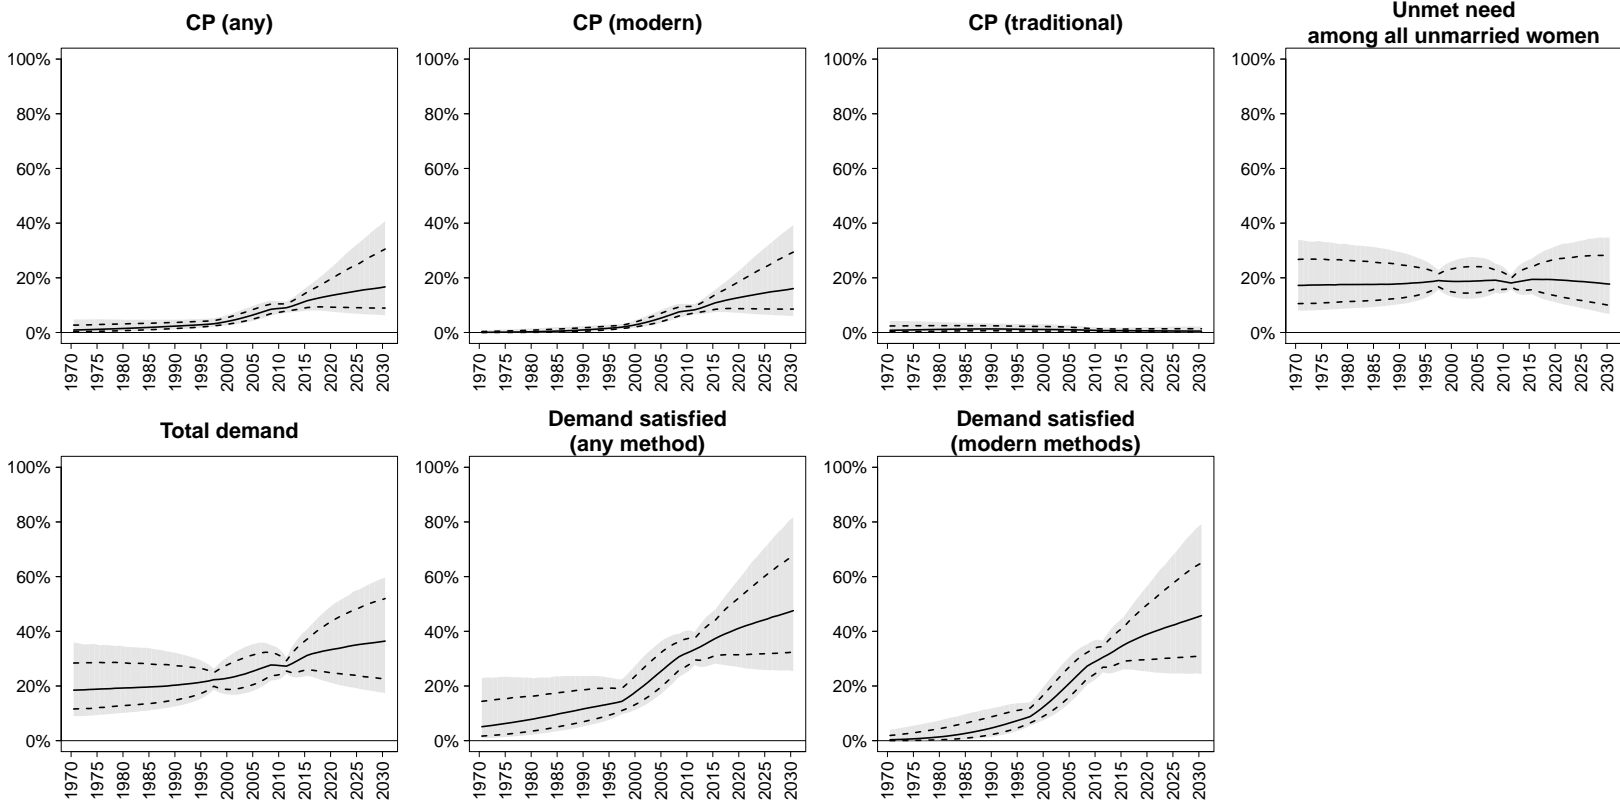

Namibia --- All women

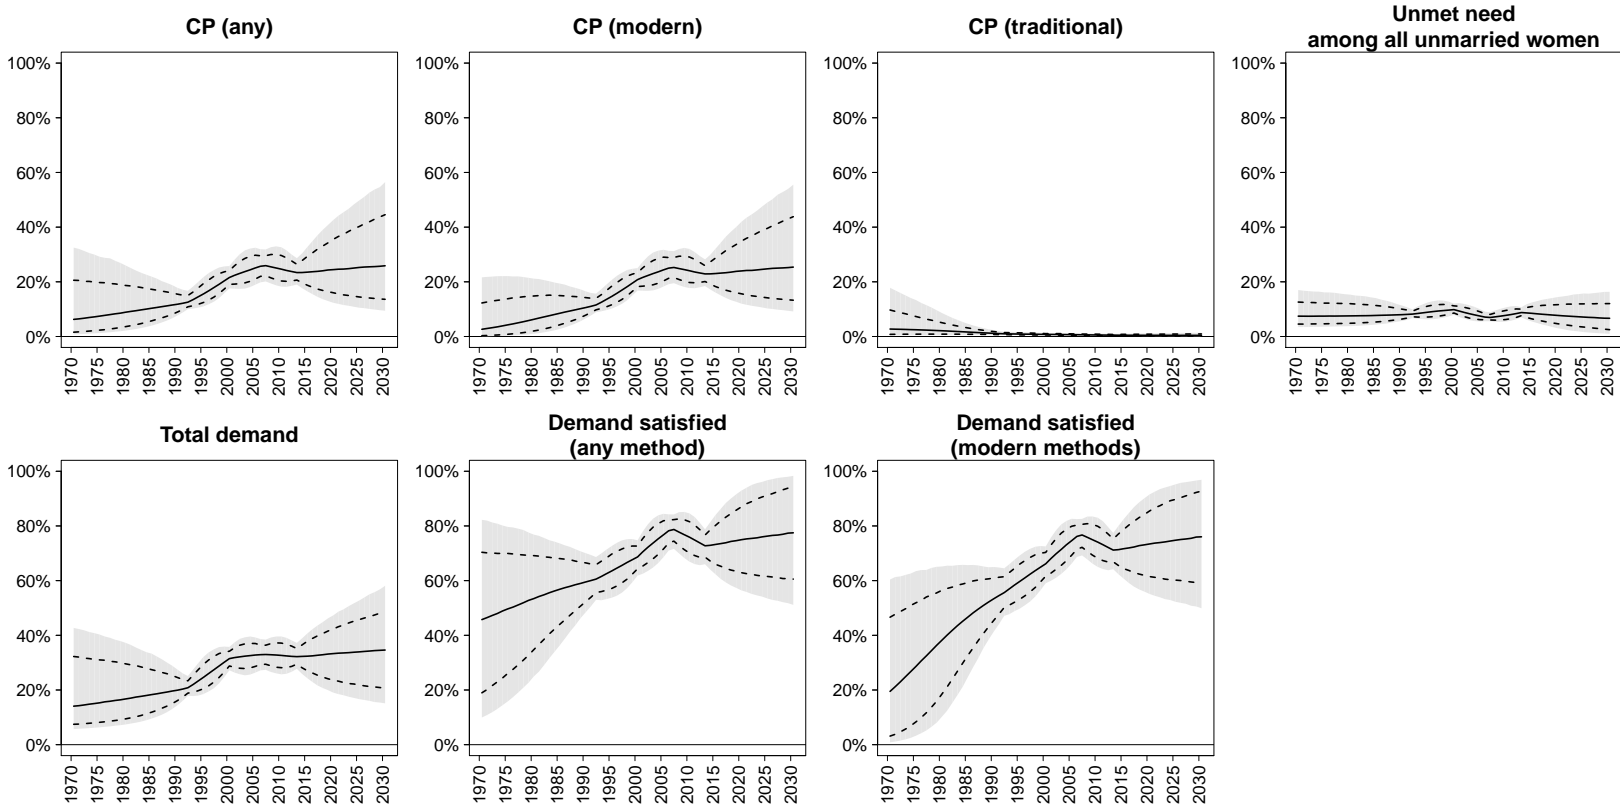

Nepal --- All women

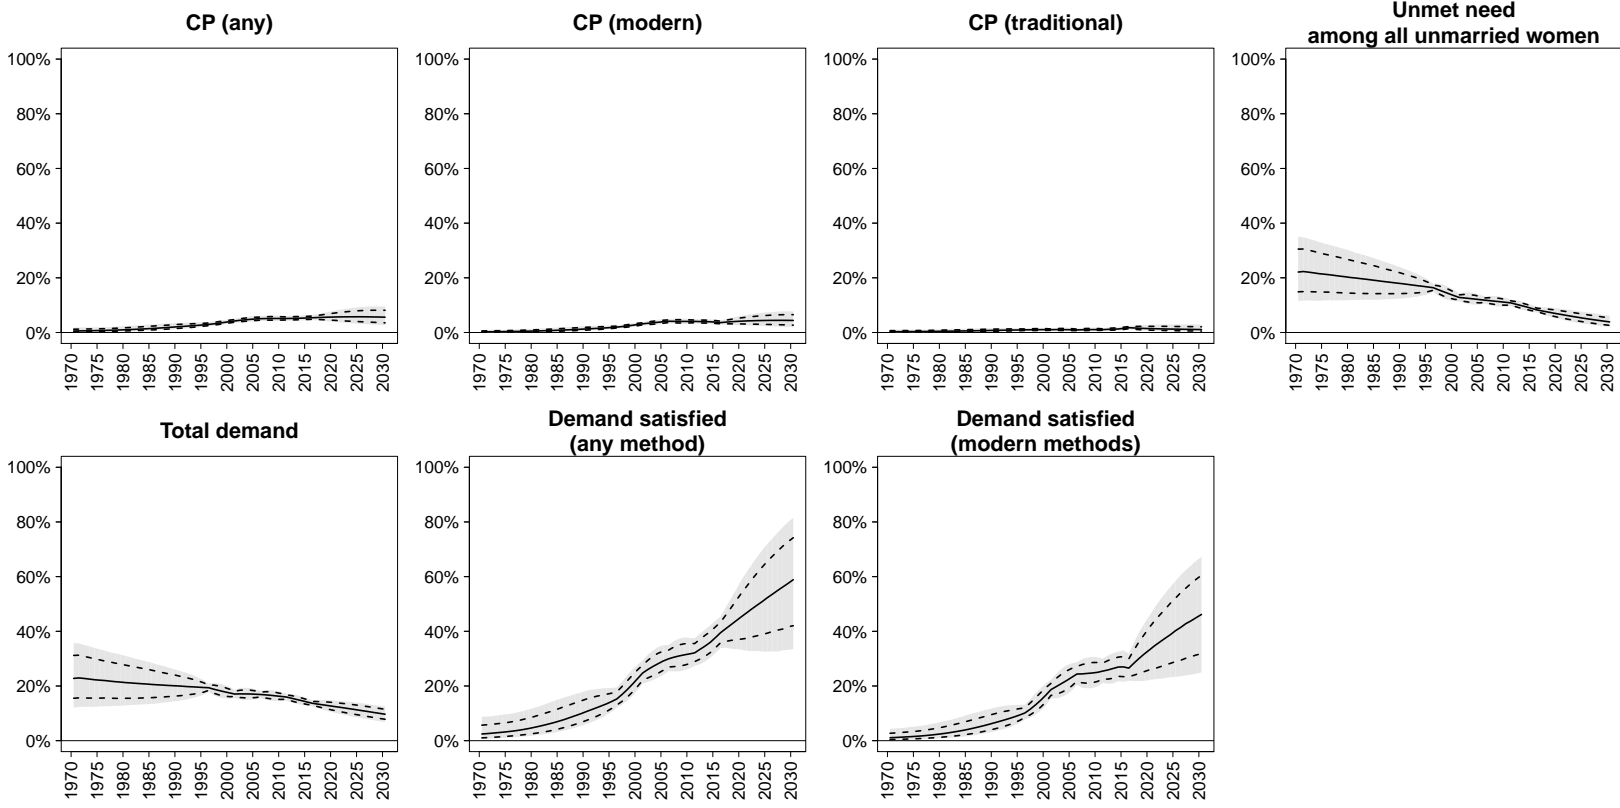

Nicaragua --- All women

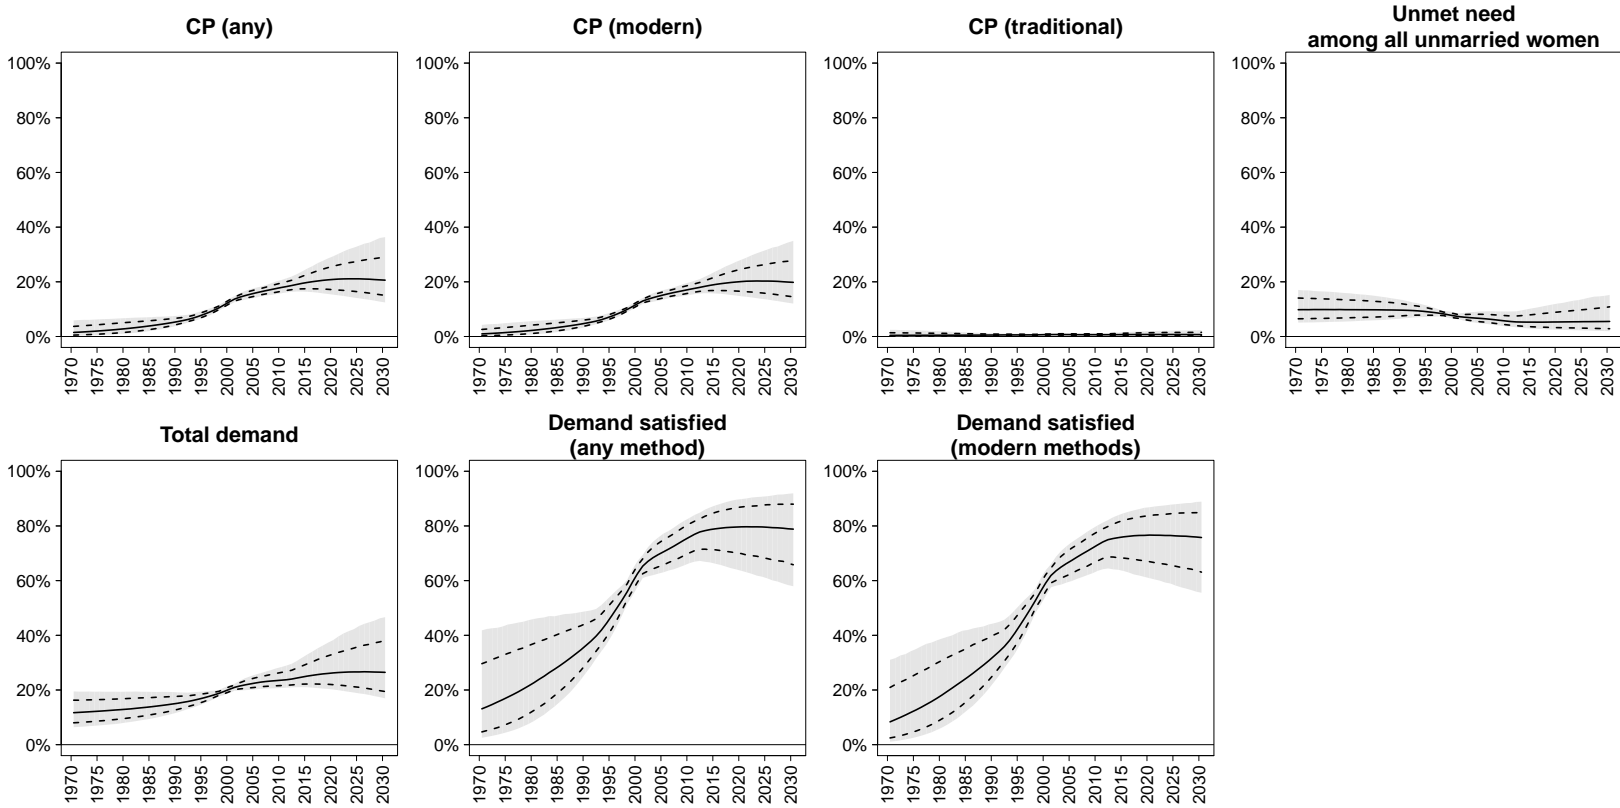

Niger --- All women

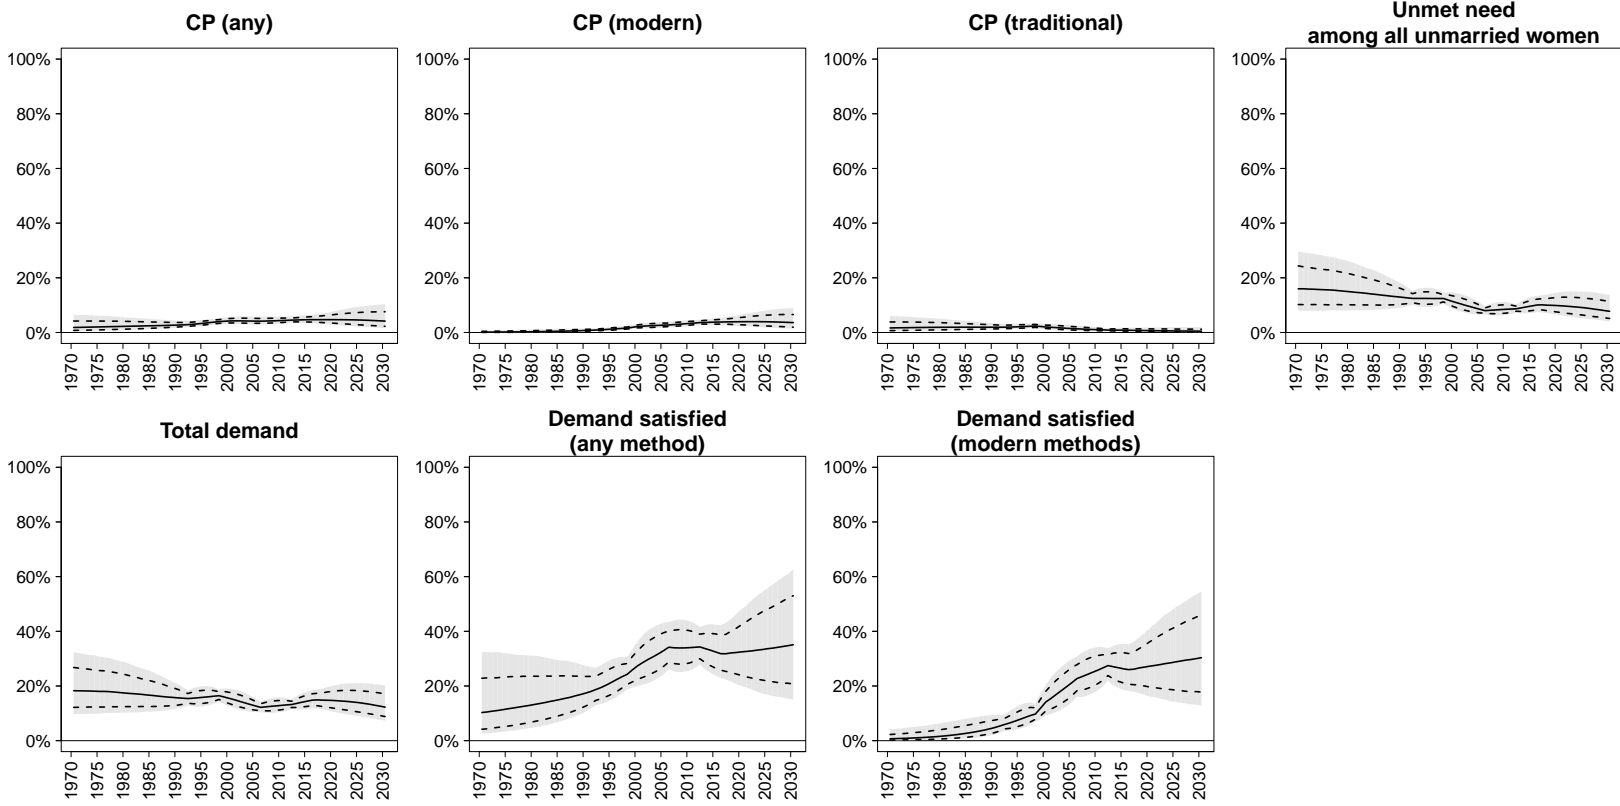

Nigeria ---- All women

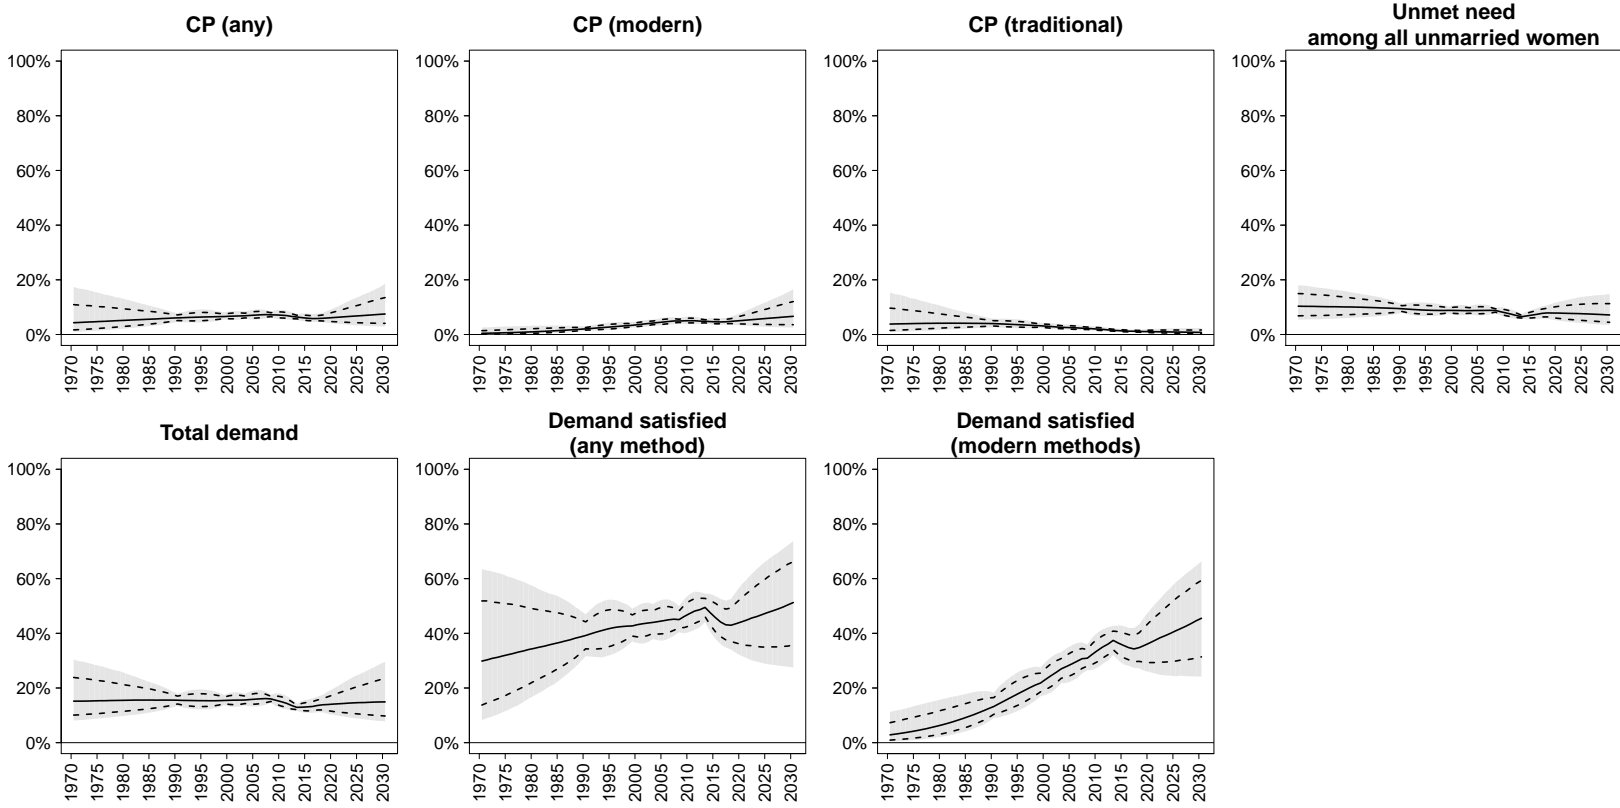

Papua New Guinea --- All women

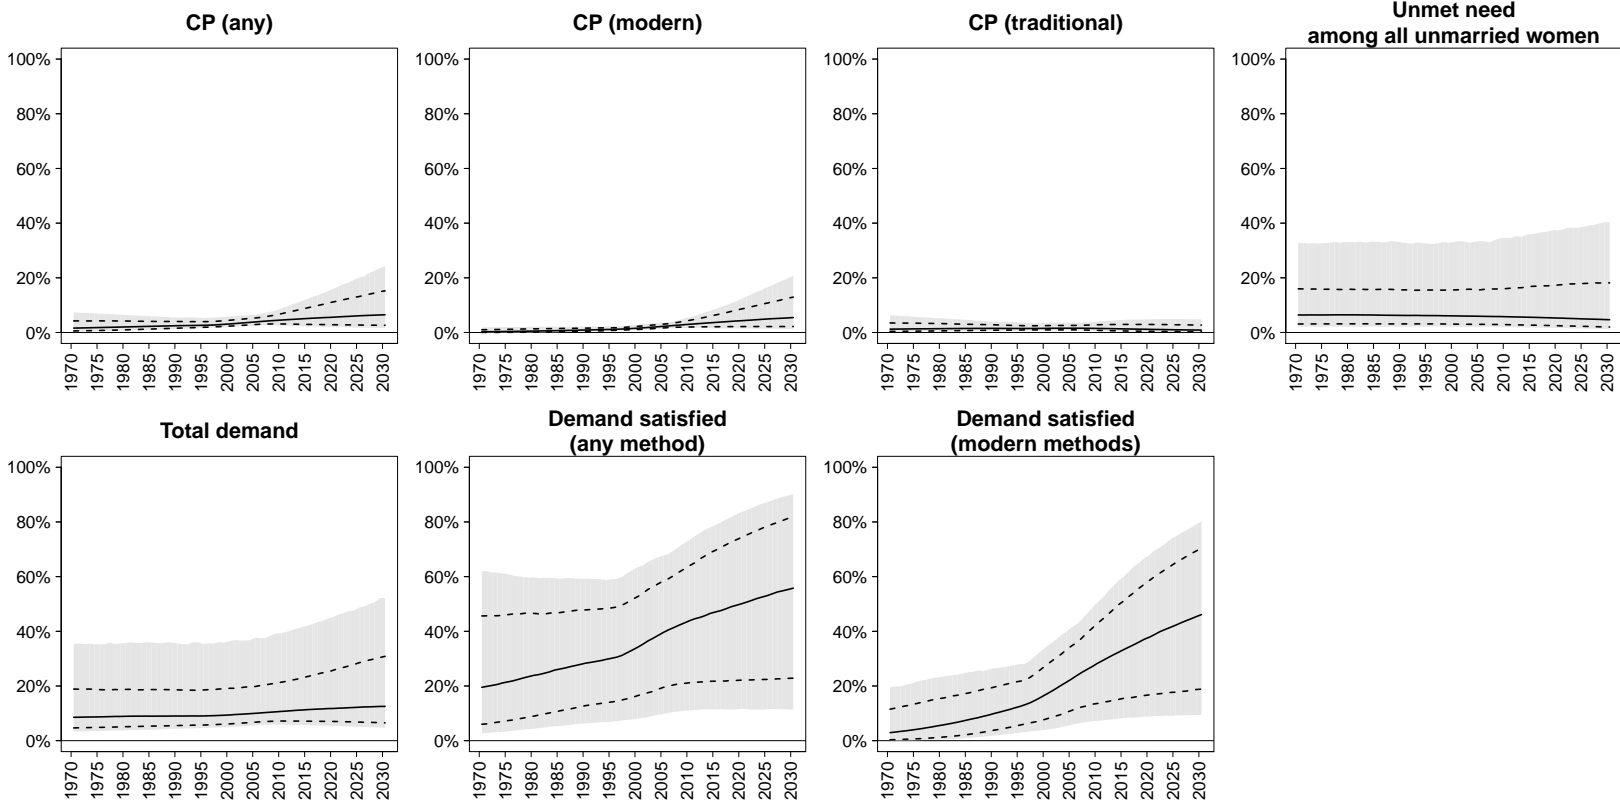



Paraguay --- All women

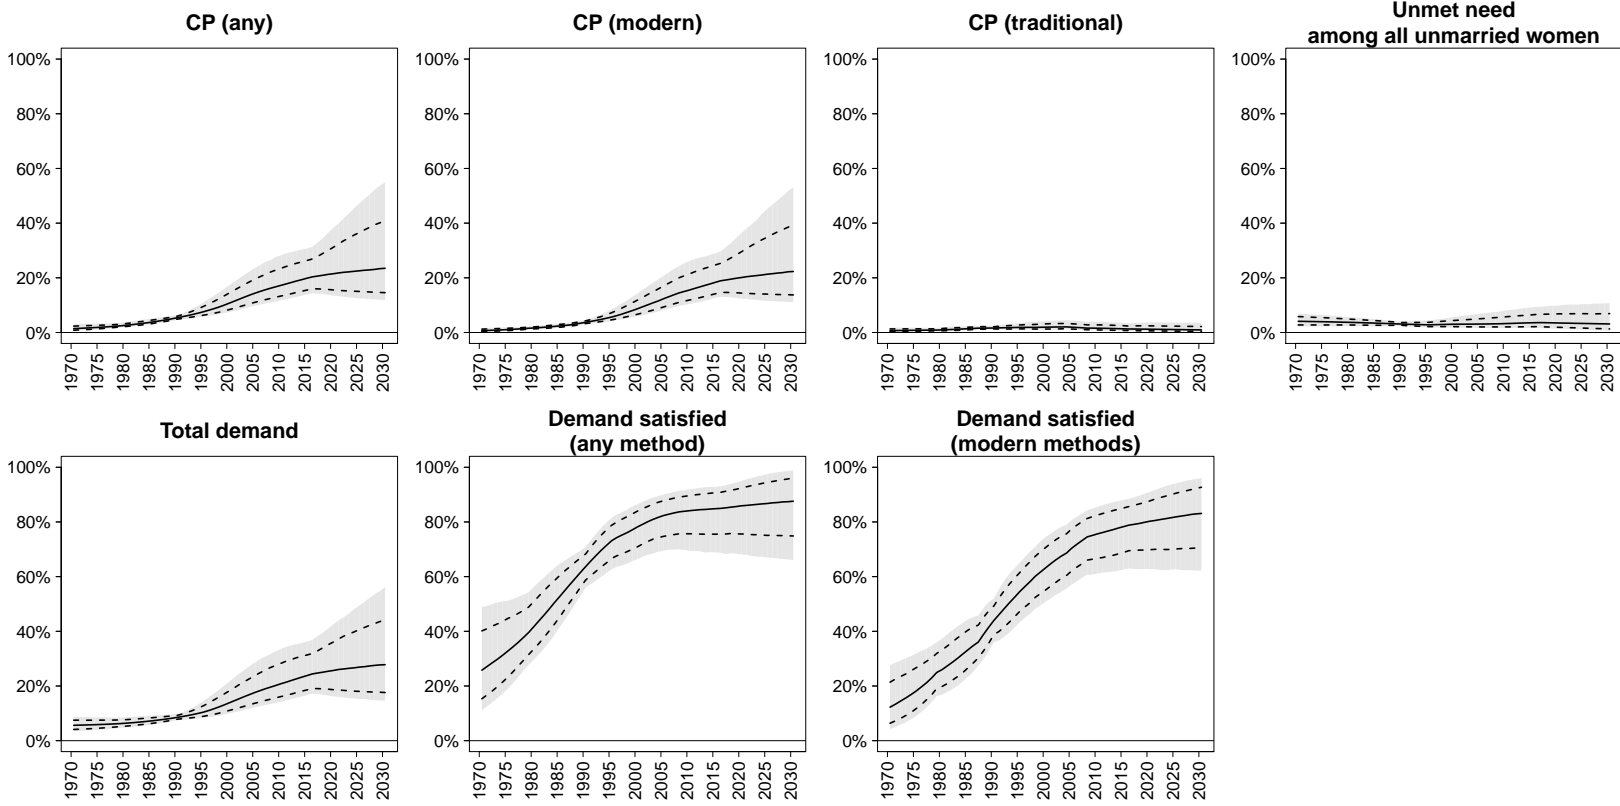

Peru --- All women

CP (any)

CP (modern)

CP (traditional)

Unmet need among all unmarried women

Total demand

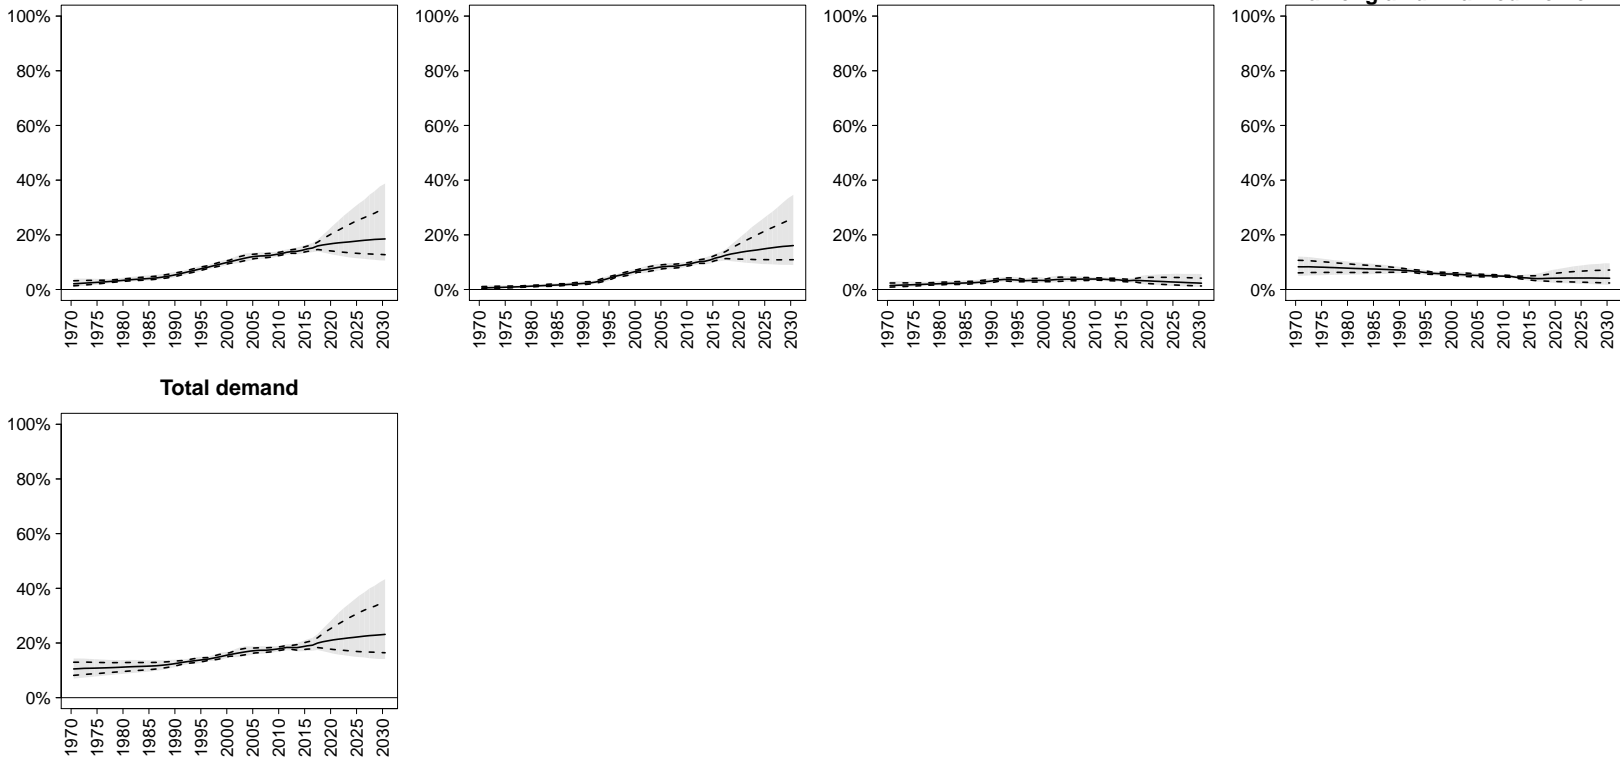

Philippines --- All women

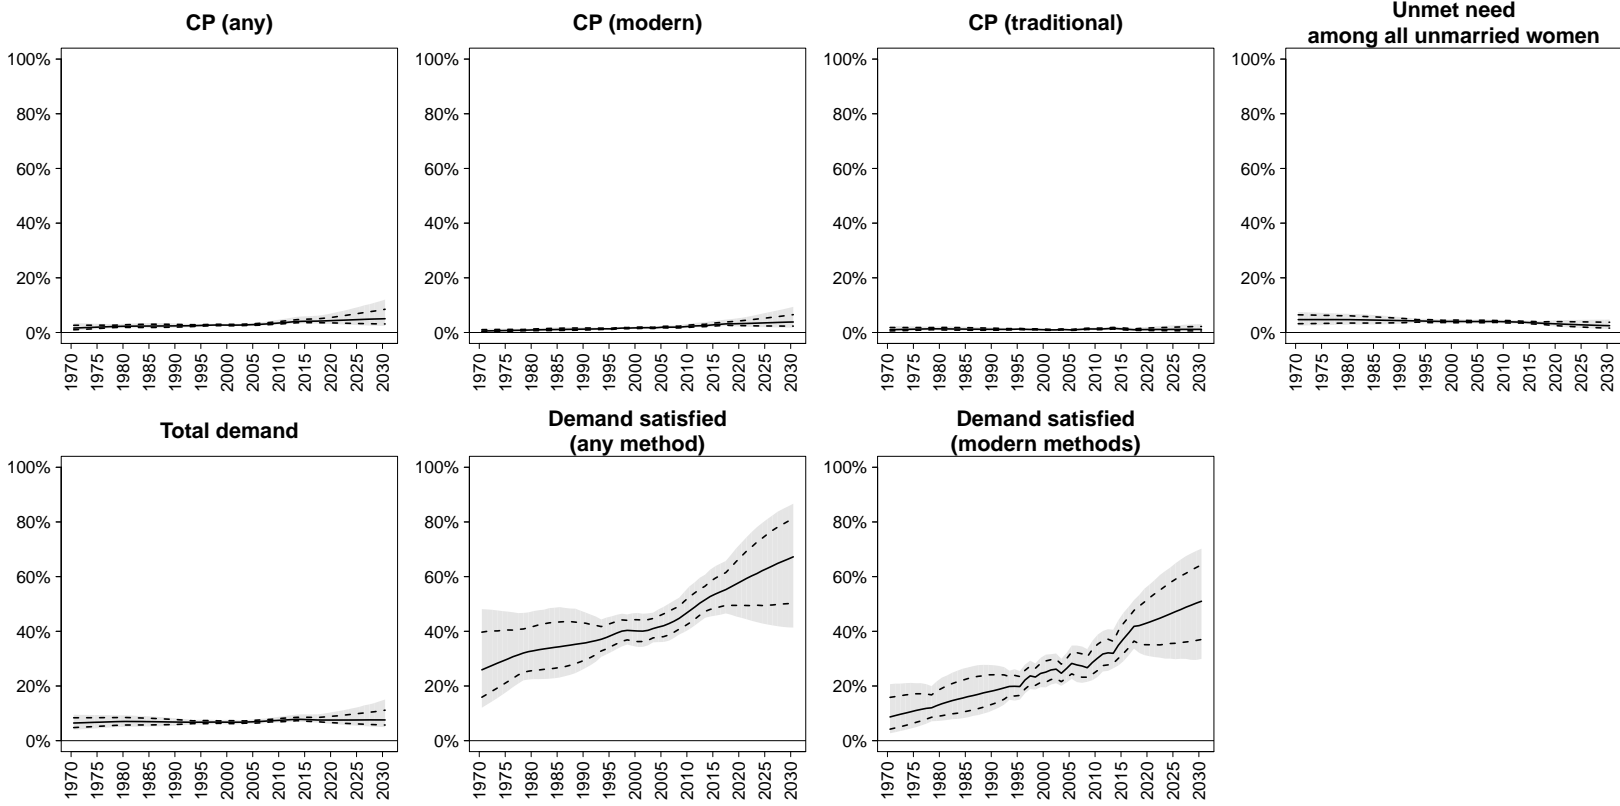

Republic of Moldova --- All women

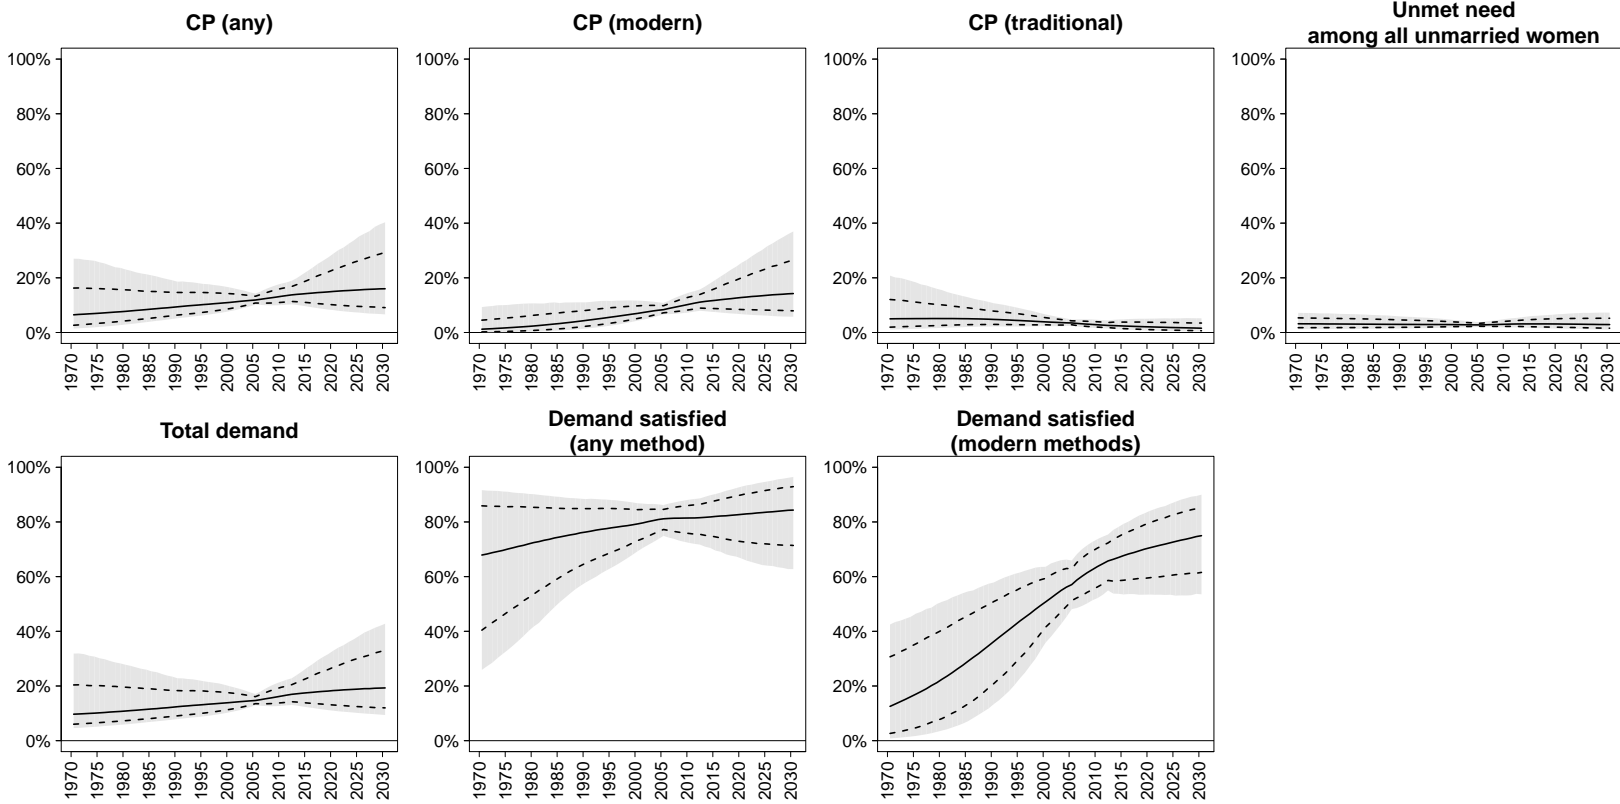

Rwanda --- All women

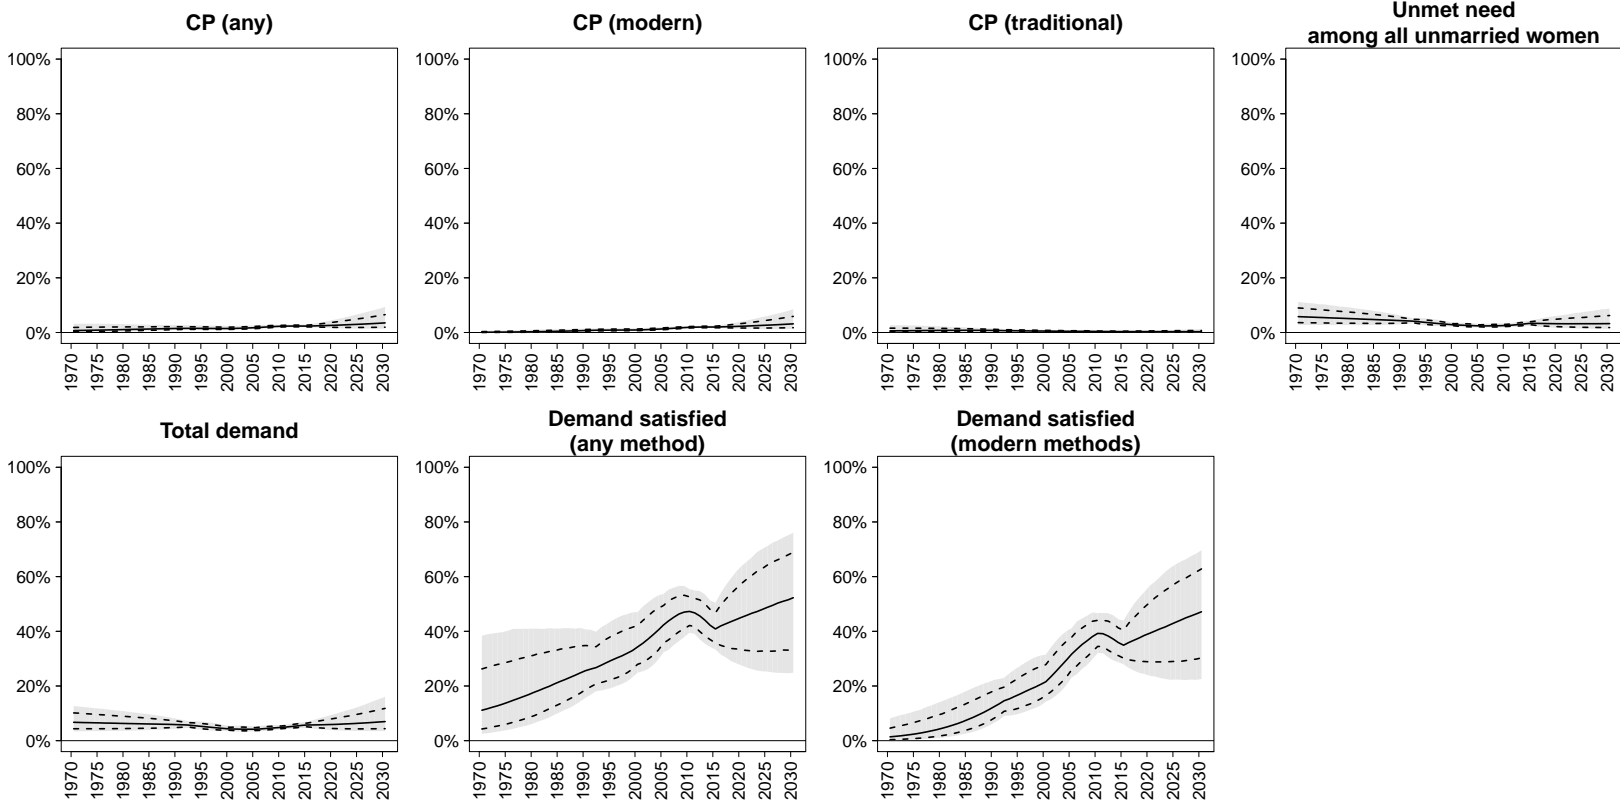

Samoa --- All women

CP (any)

CP (modern)

CP (traditional)

Unmet need among all unmarried women

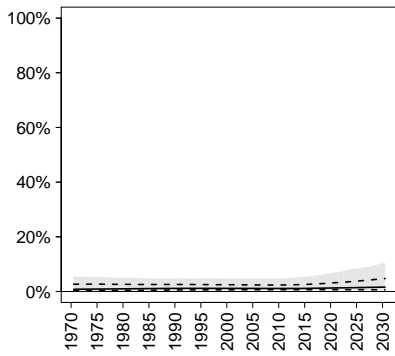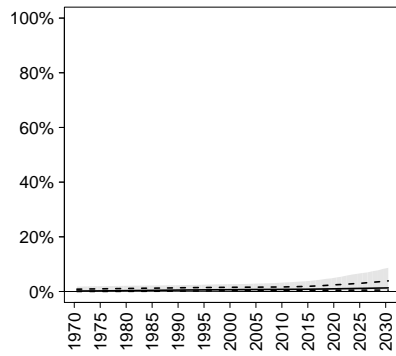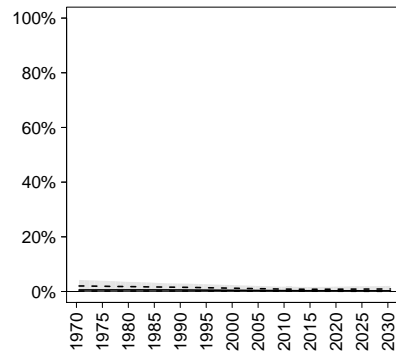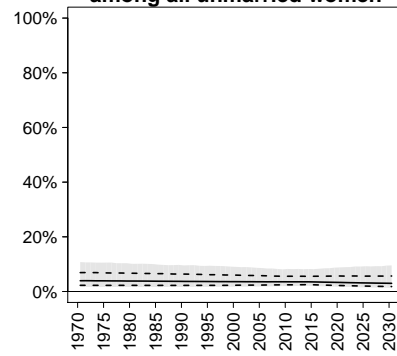

Total demand

Demand satisfied (any method)

Demand satisfied (modern methods)

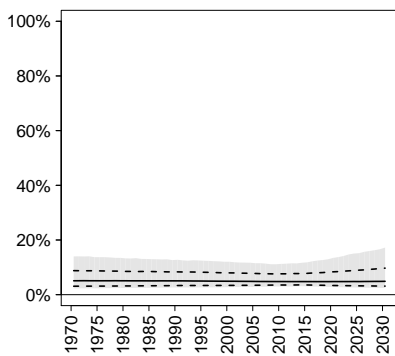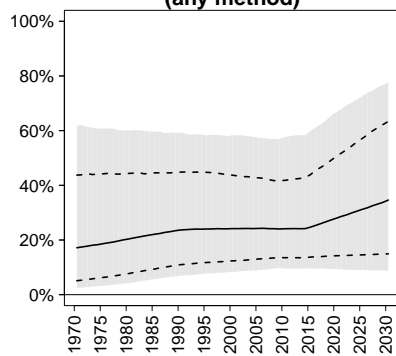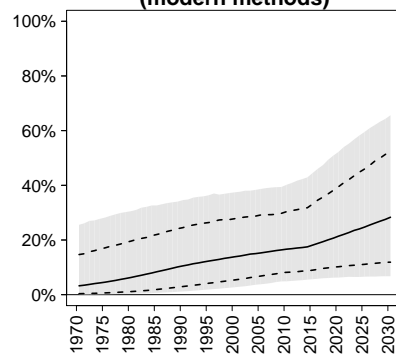

Sao Tome and Principe ---- All women

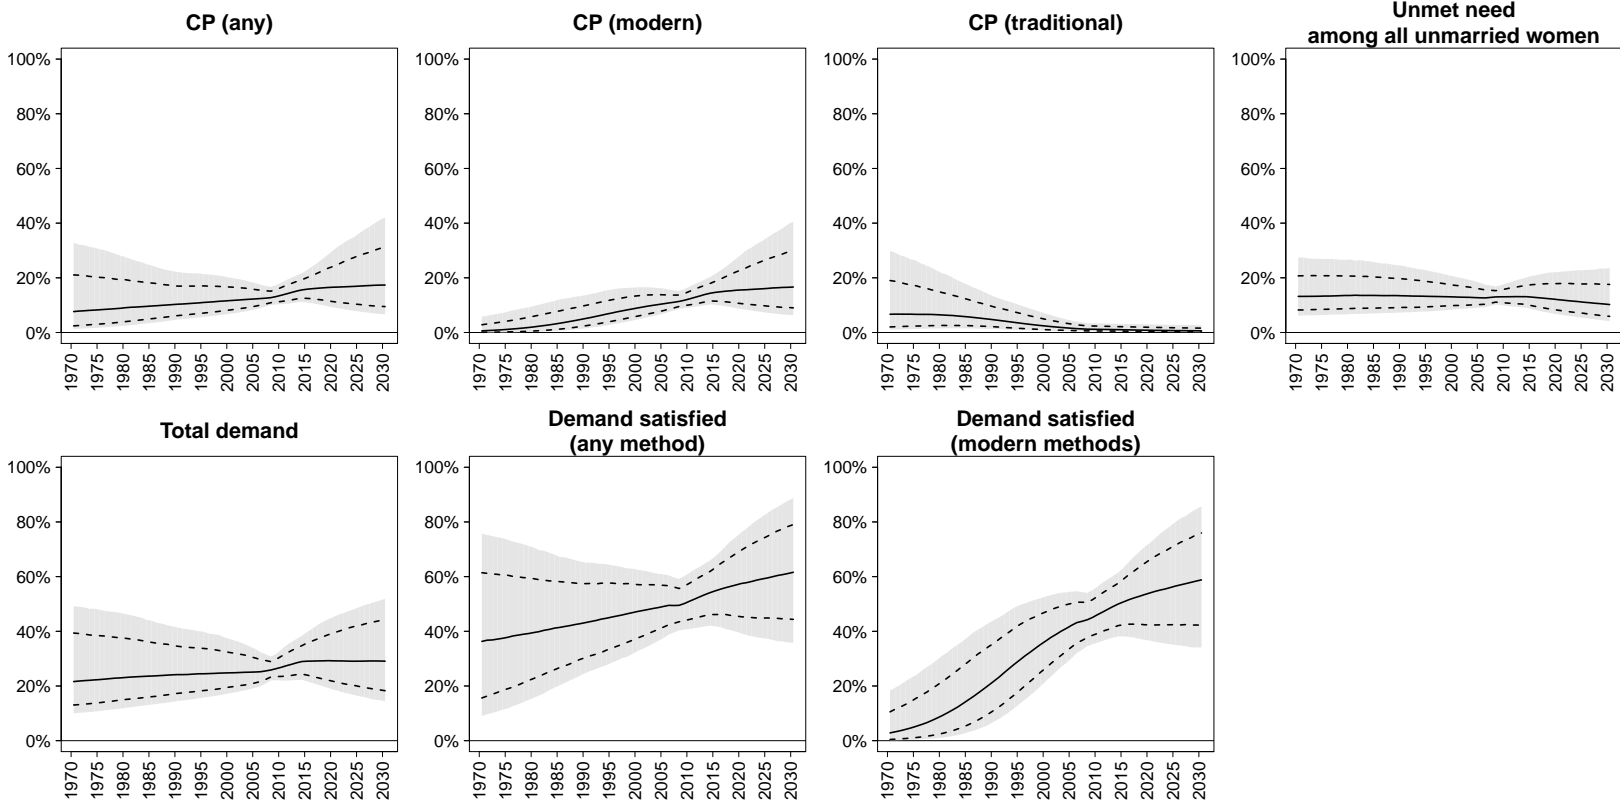

Senegal --- All women

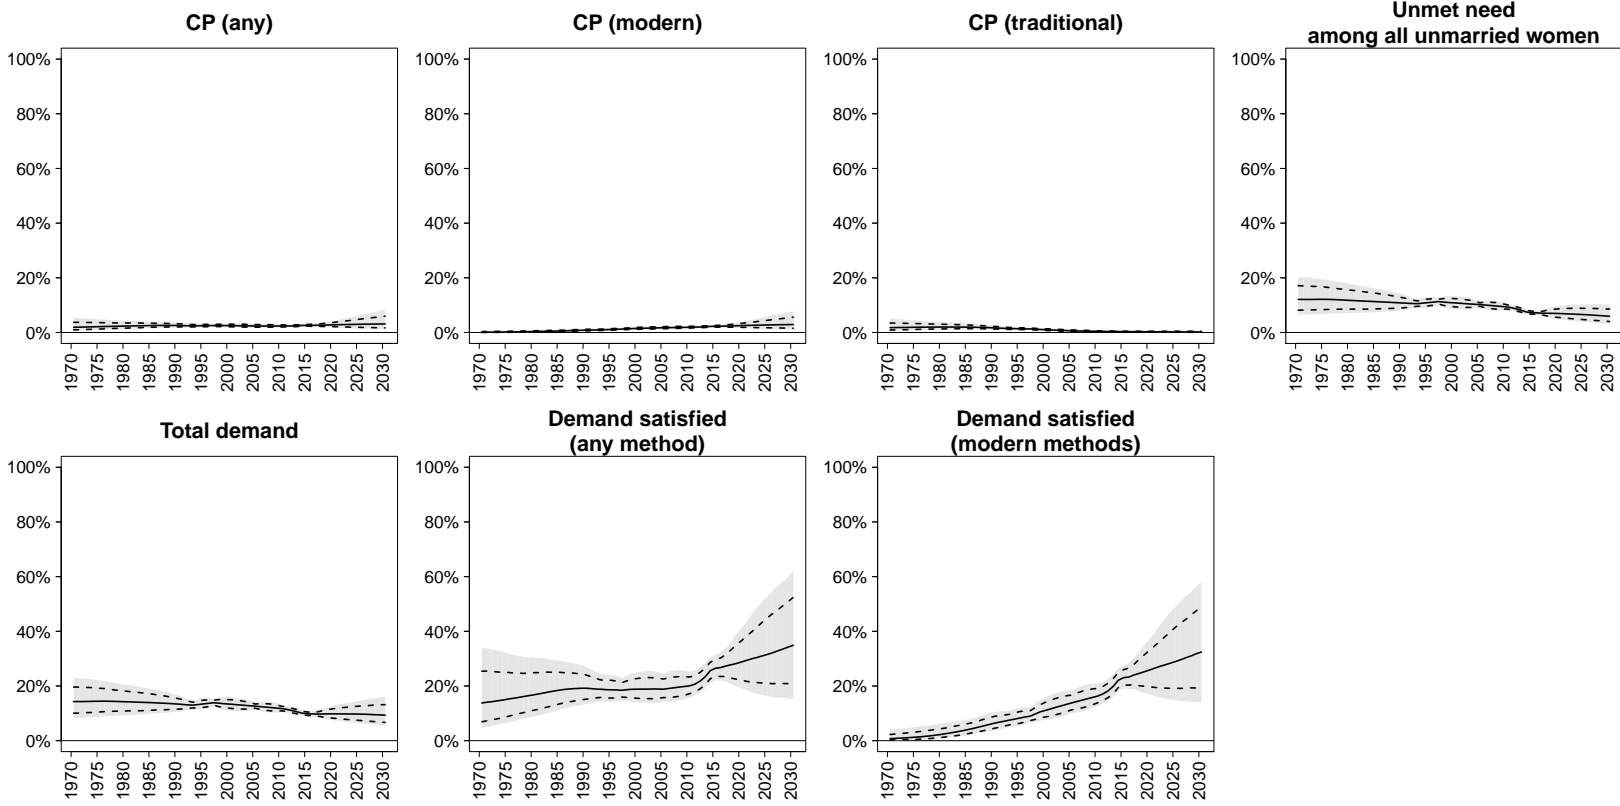



Sierra Leone --- All women

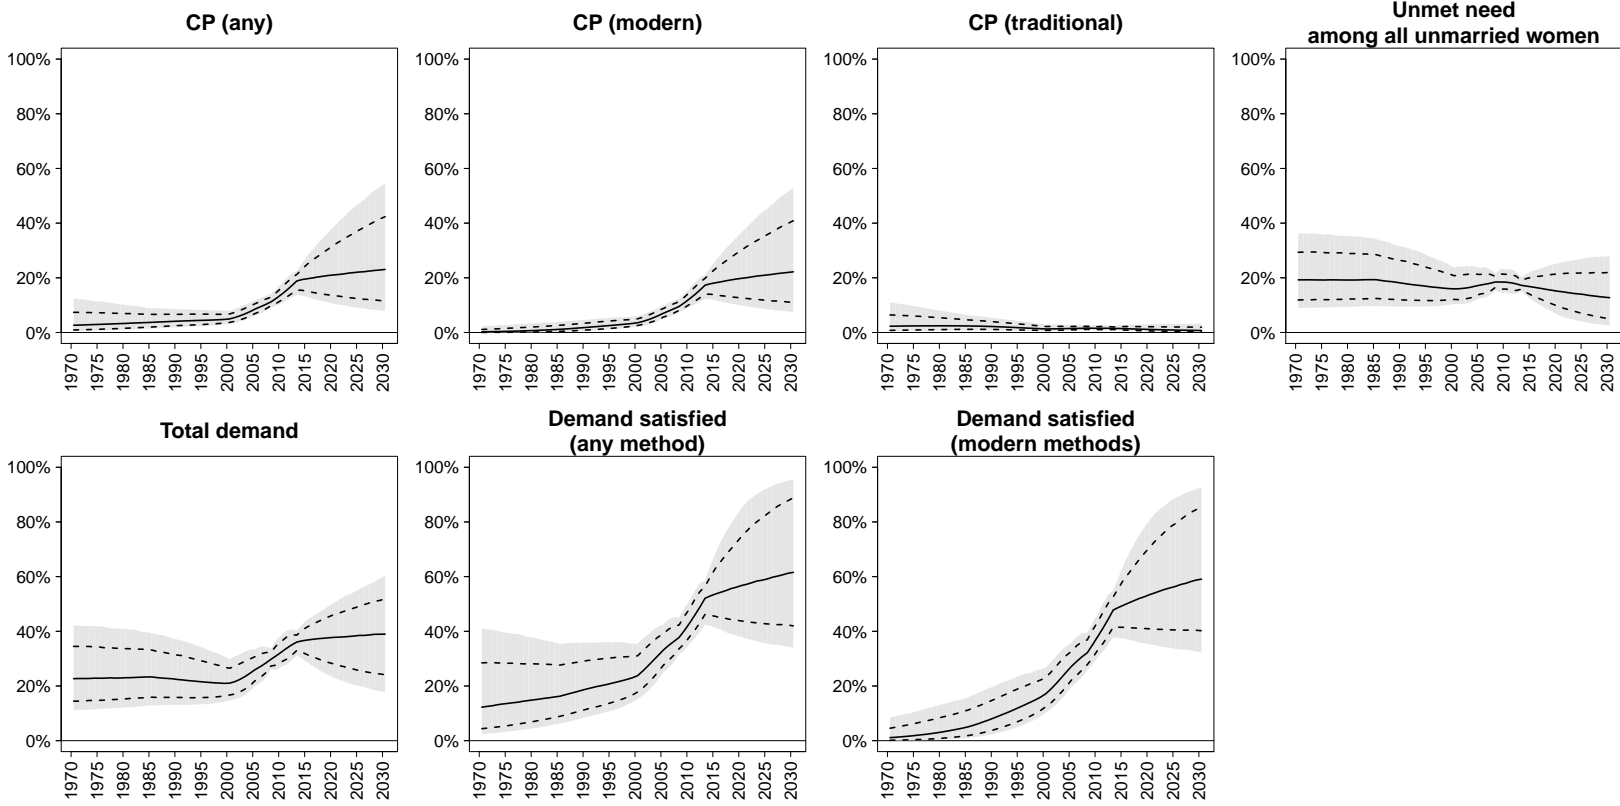

Solomon Islands --- All women

CP (any)

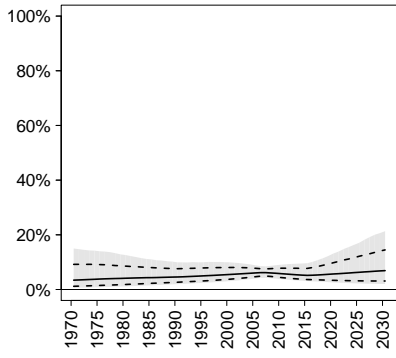

CP (modern)

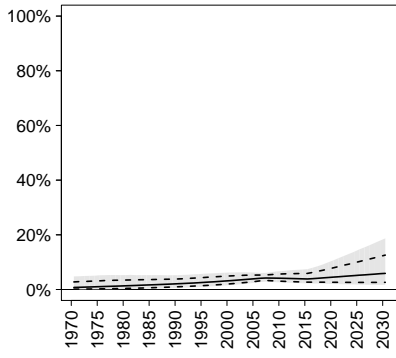

CP (traditional)

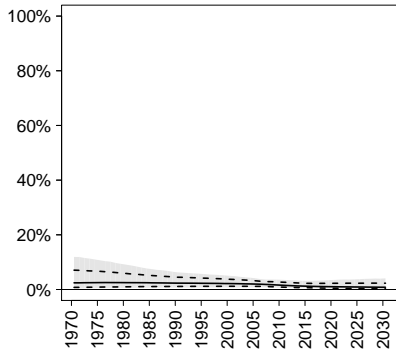

Unmet need among all unmarried women

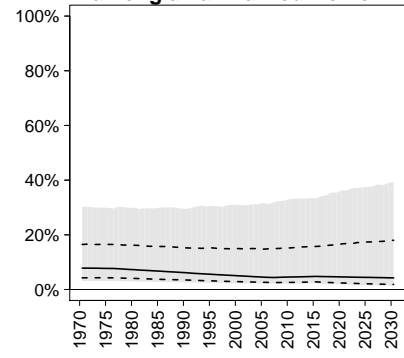

Total demand

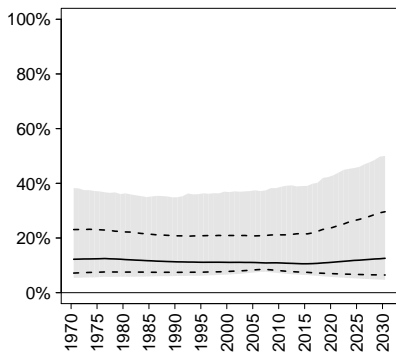

South Africa --- All women

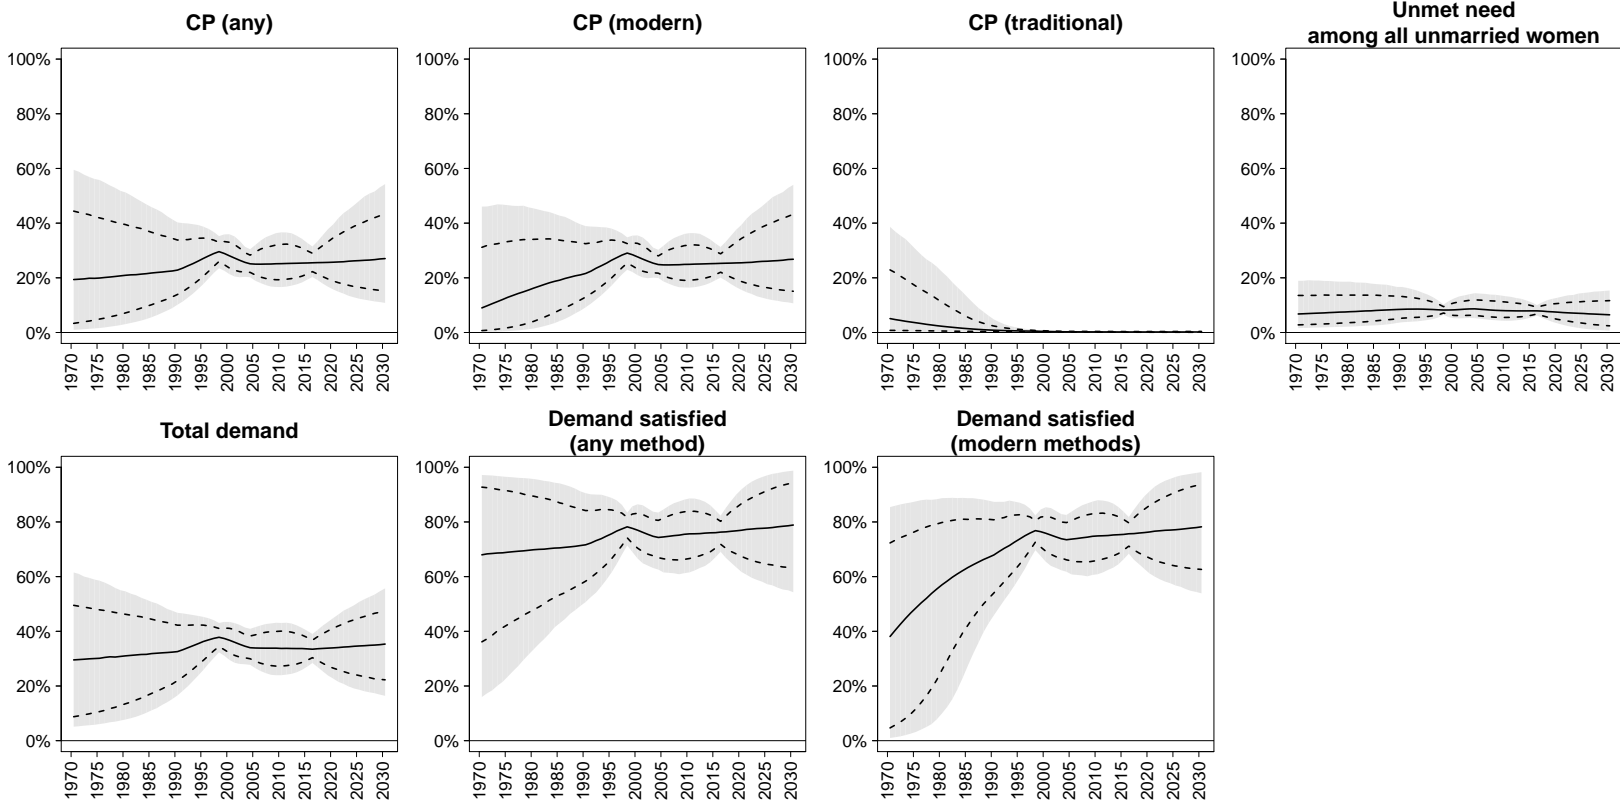

Suriname --- All women

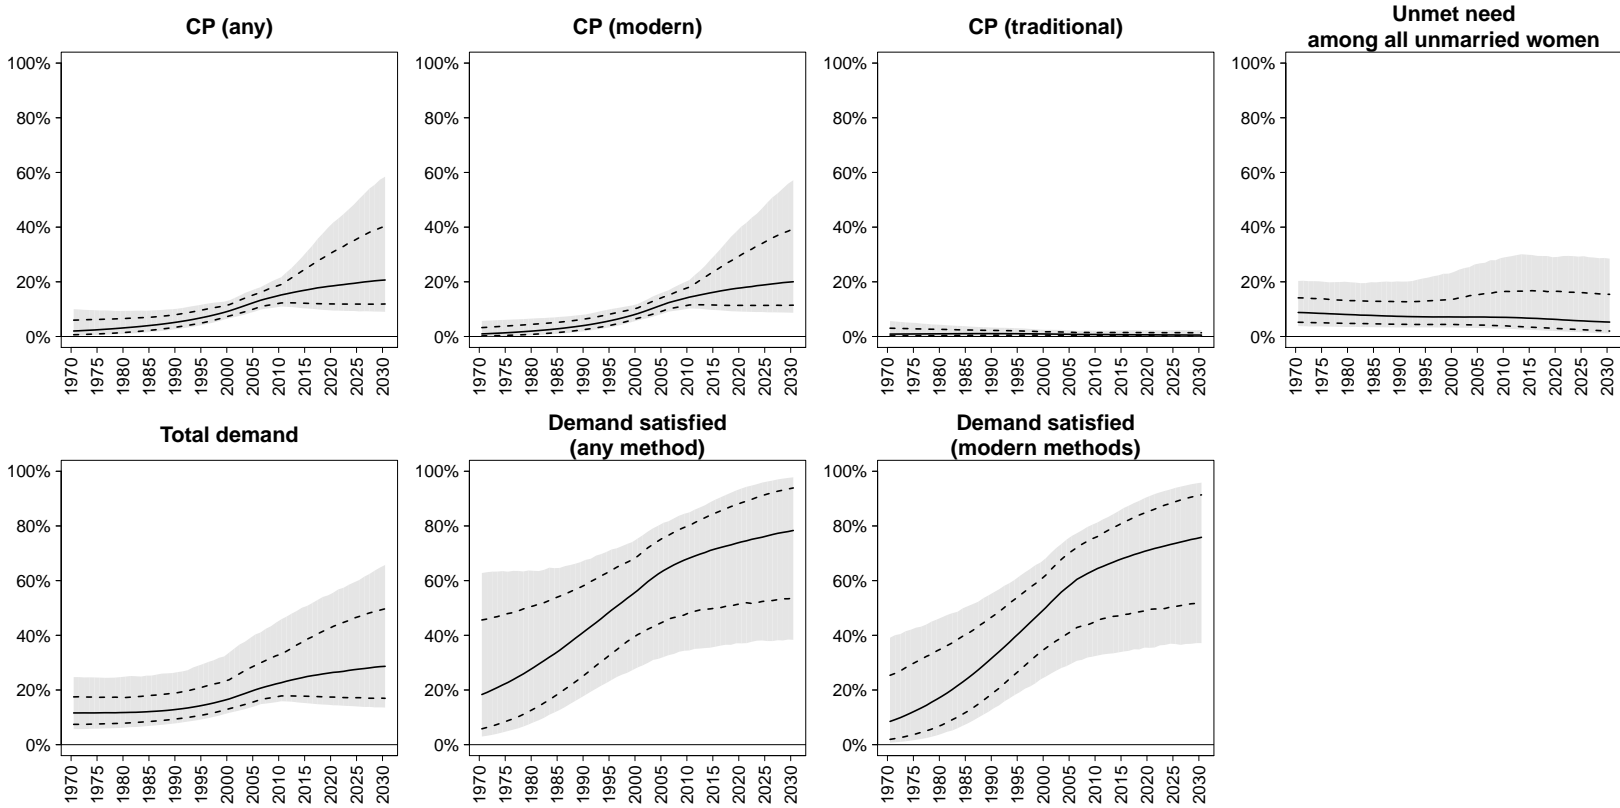

Tajikistan --- All women

CP (any)

CP (modern)

CP (traditional)

Unmet need among all unmarried women

Total demand

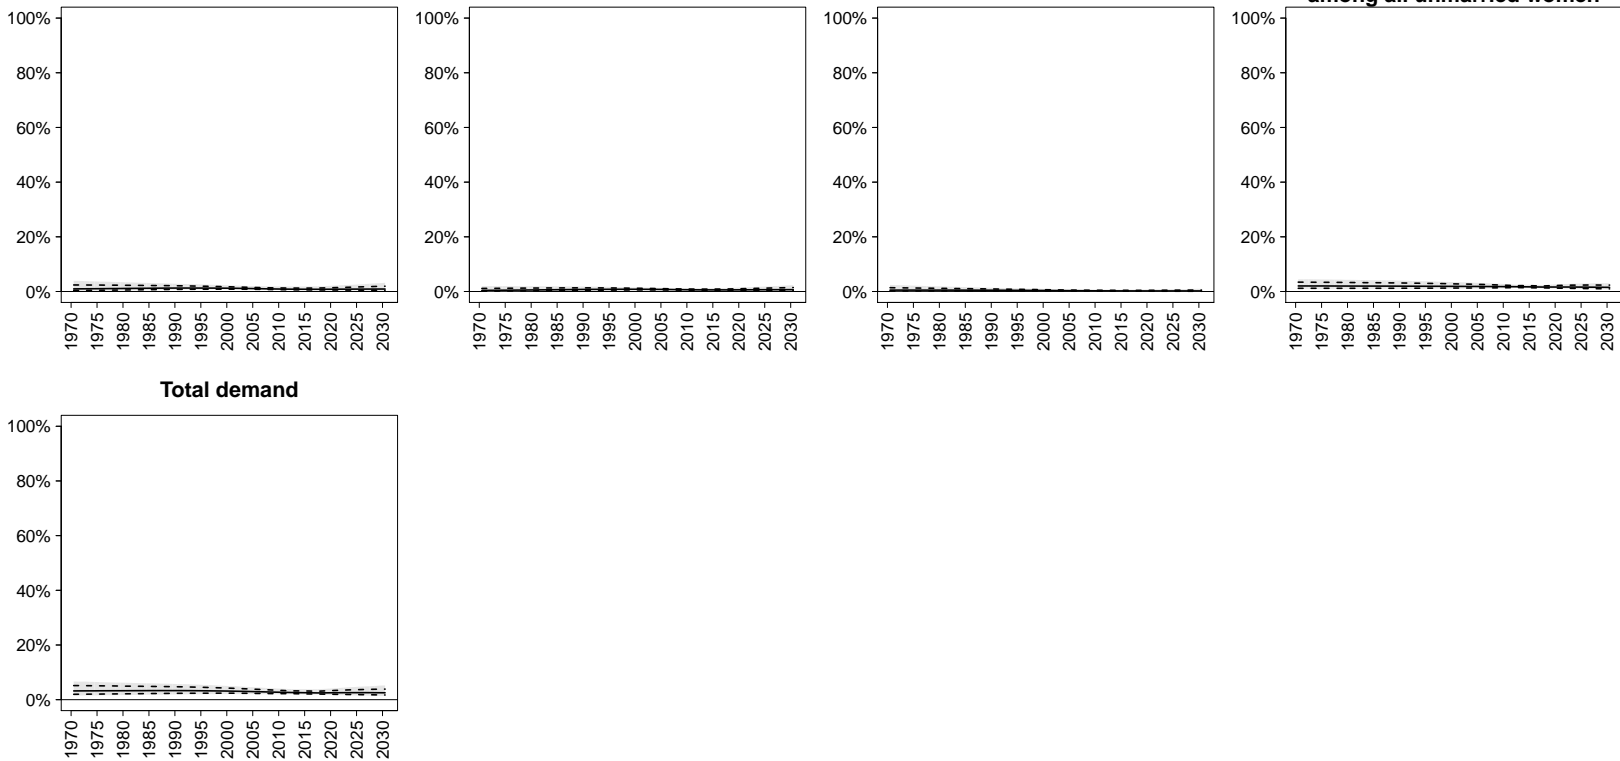

Thailand --- All women

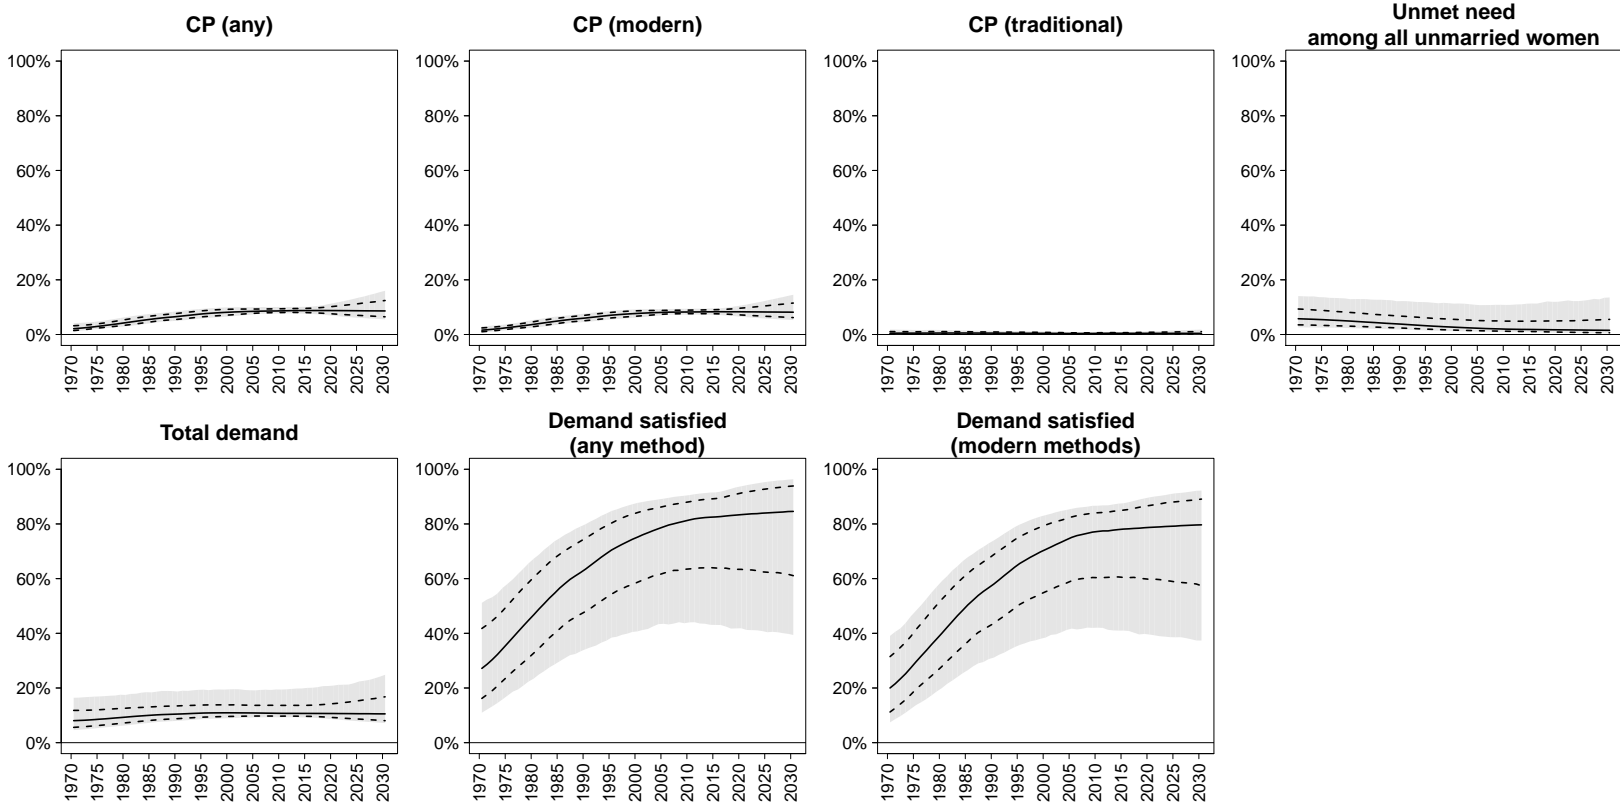

Timor-Leste ---- All women

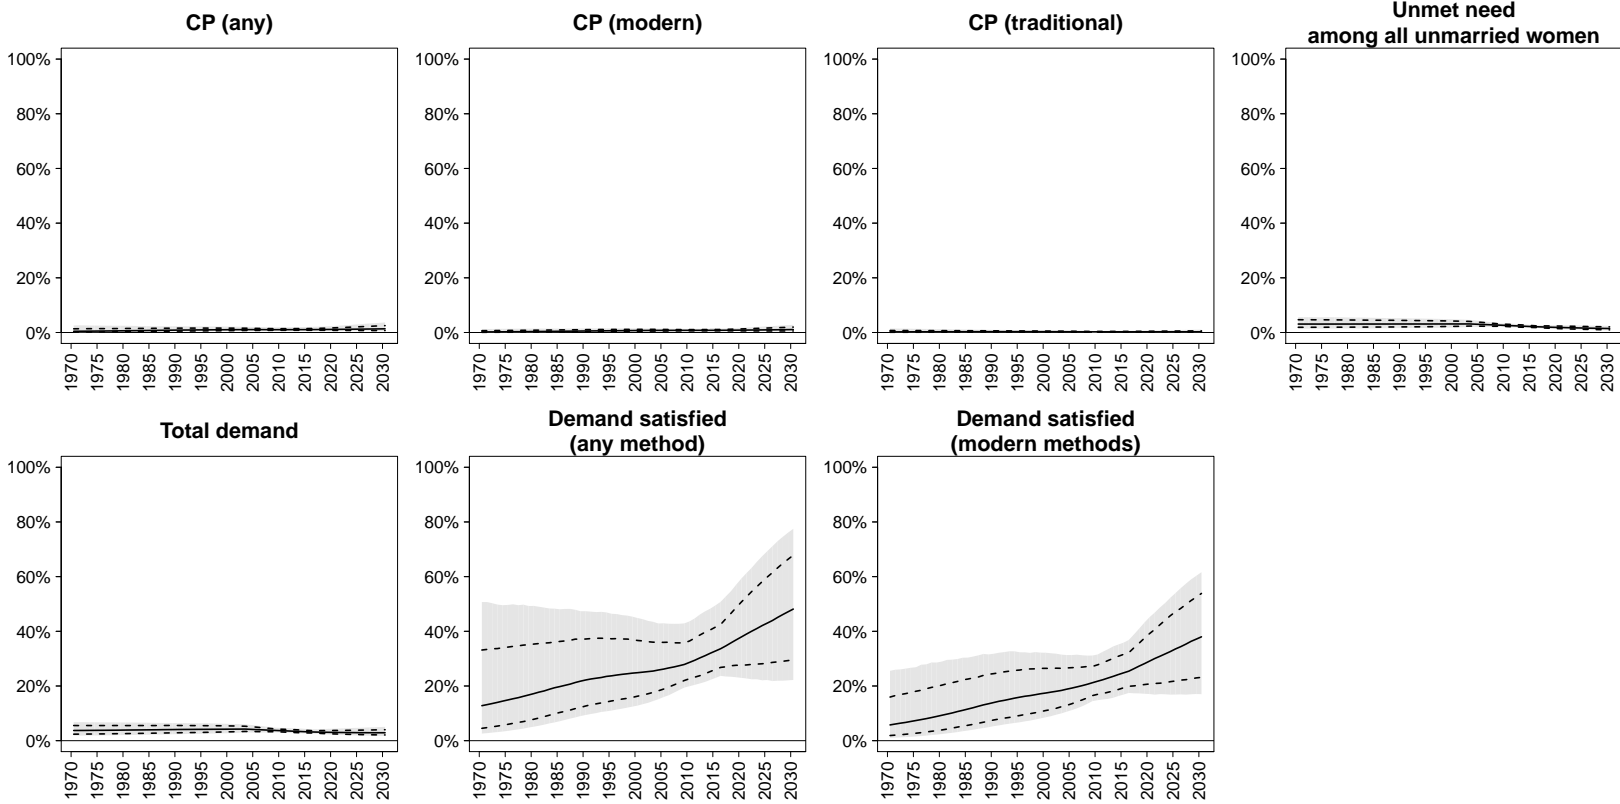

Togo --- All women

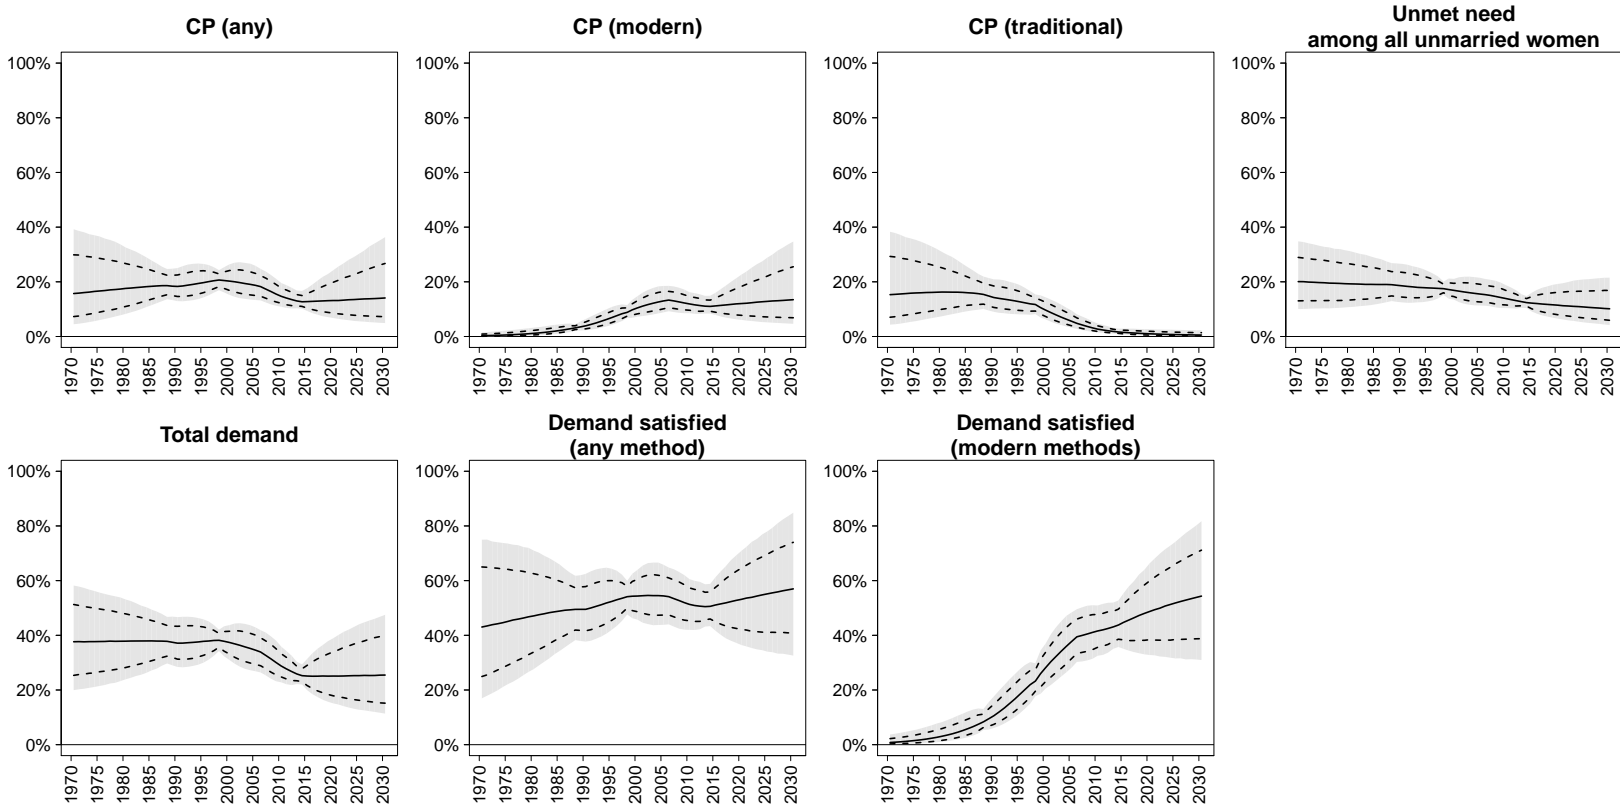



Trinidad and Tobago --- All women

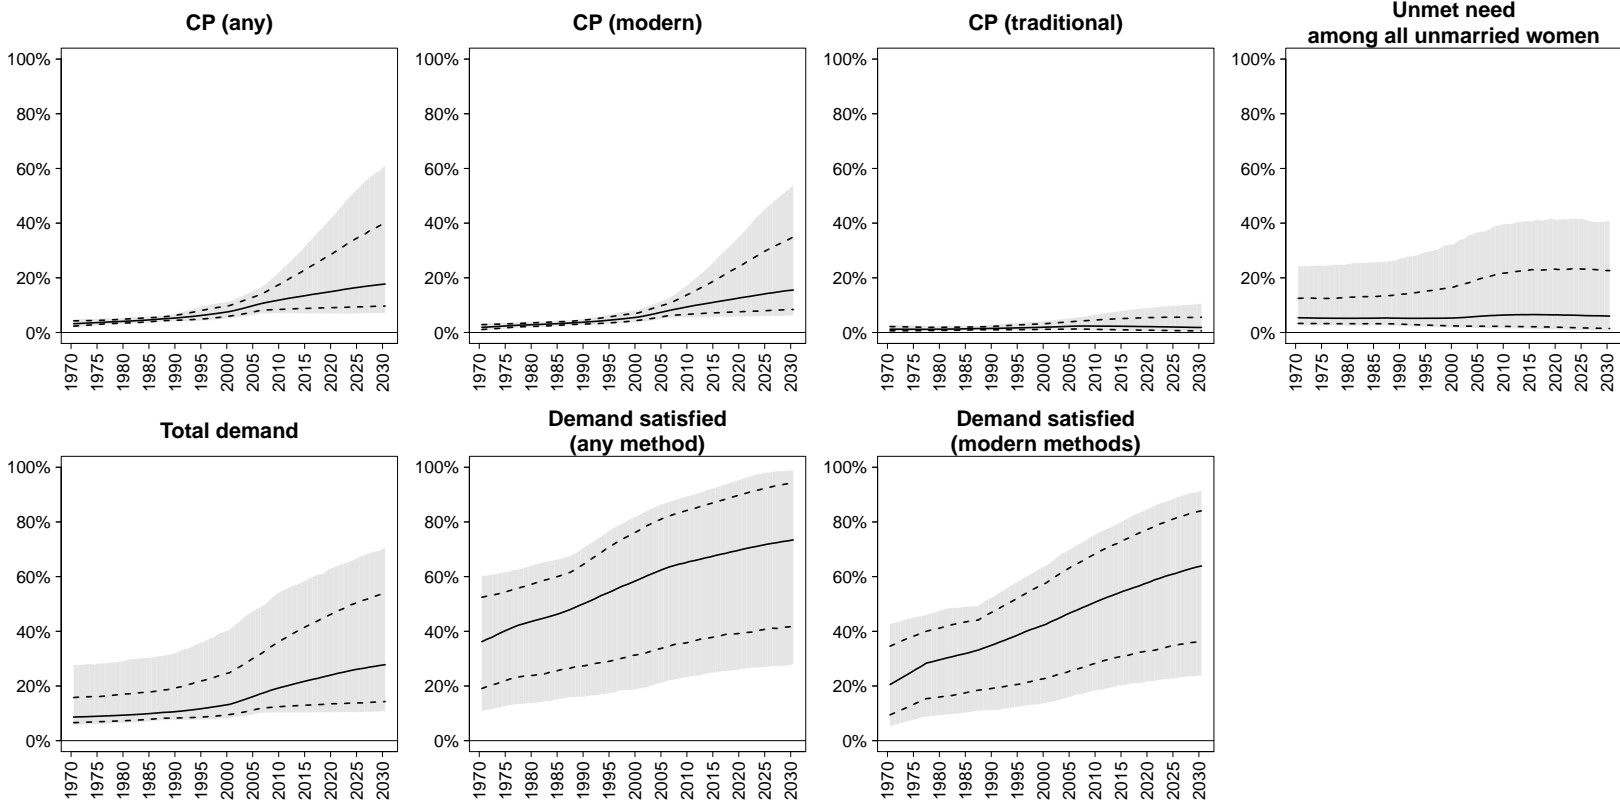

Uganda ---- All women

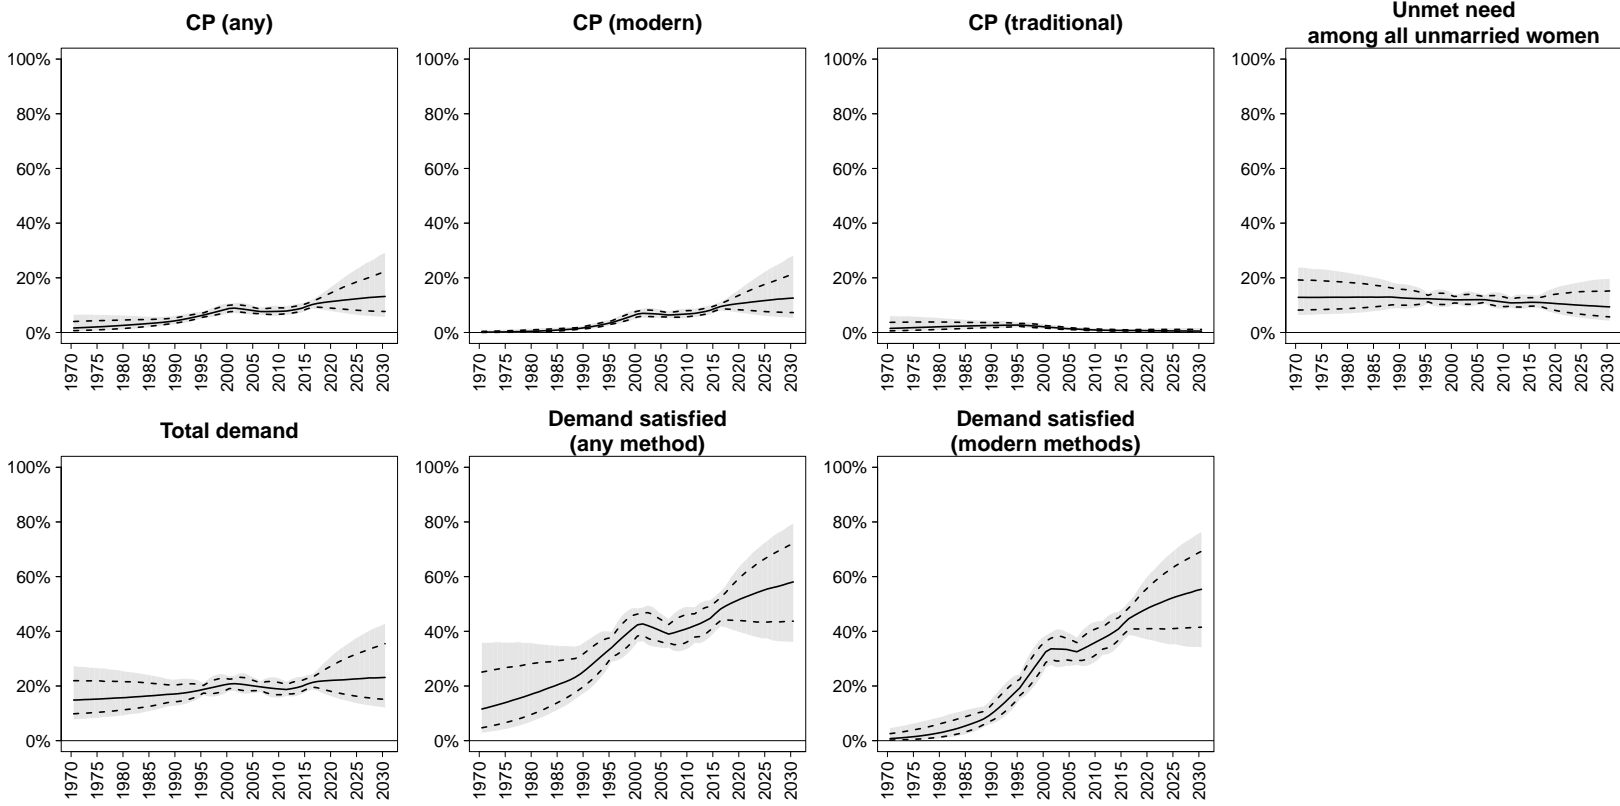

Ukraine ---- All women

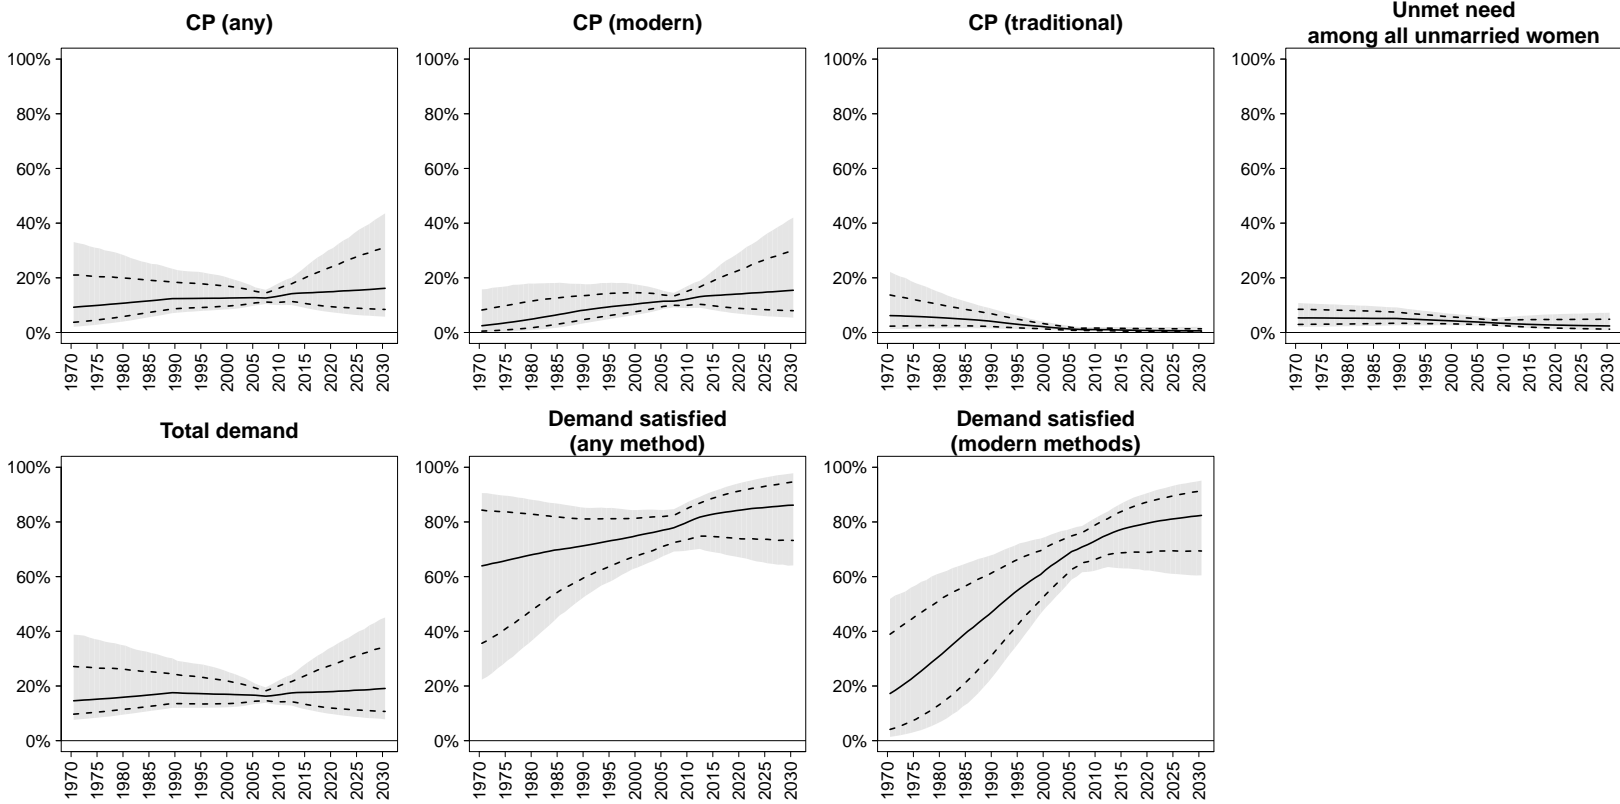

United Republic of Tanzania --- All women

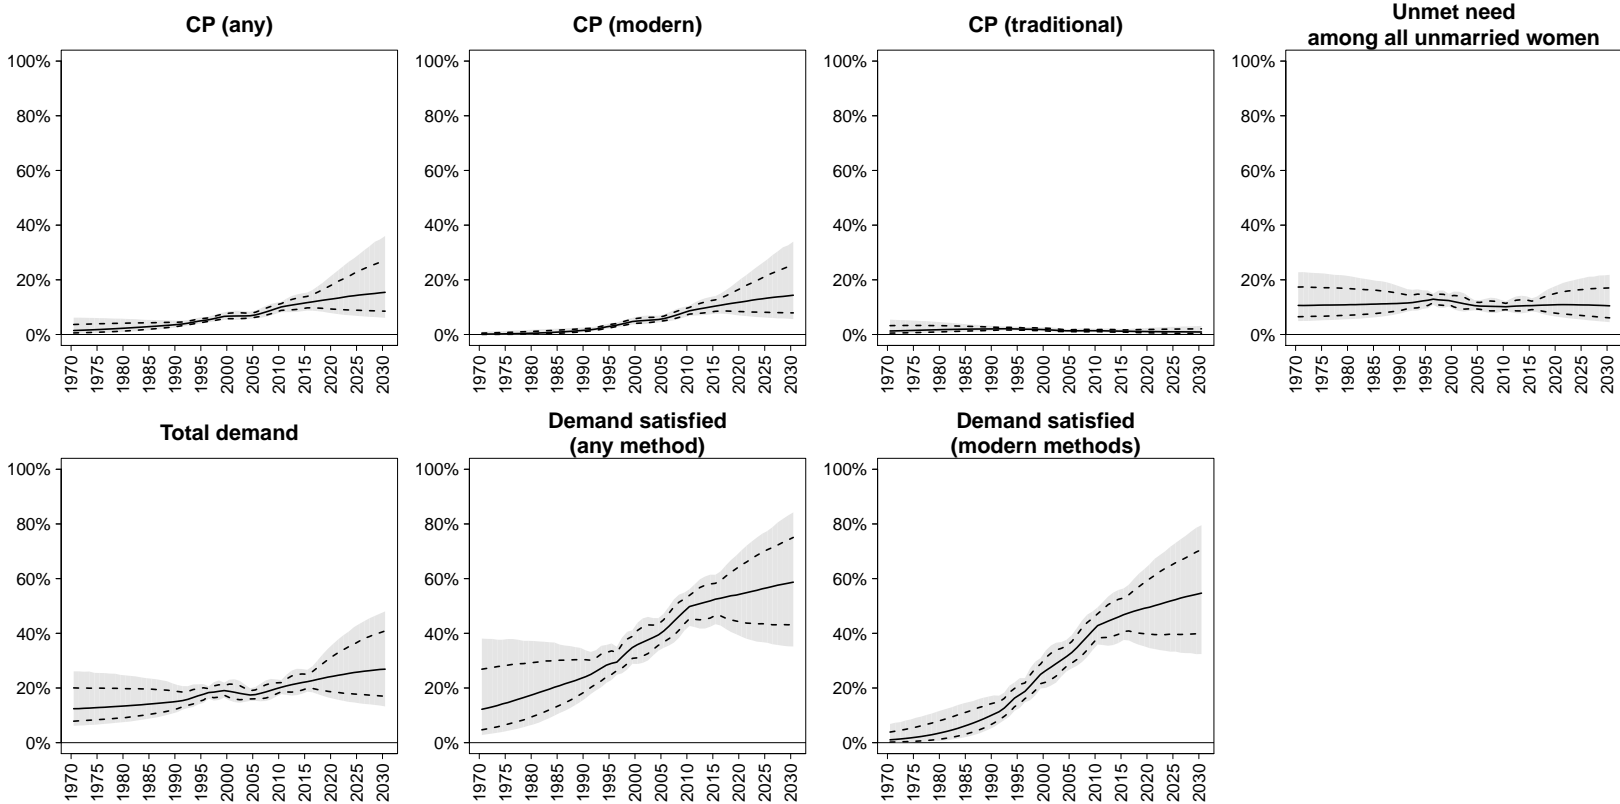

United States of America --- All women

CP (any)

CP (modern)

CP (traditional)

Unmet need among all unmarried women

Total demand

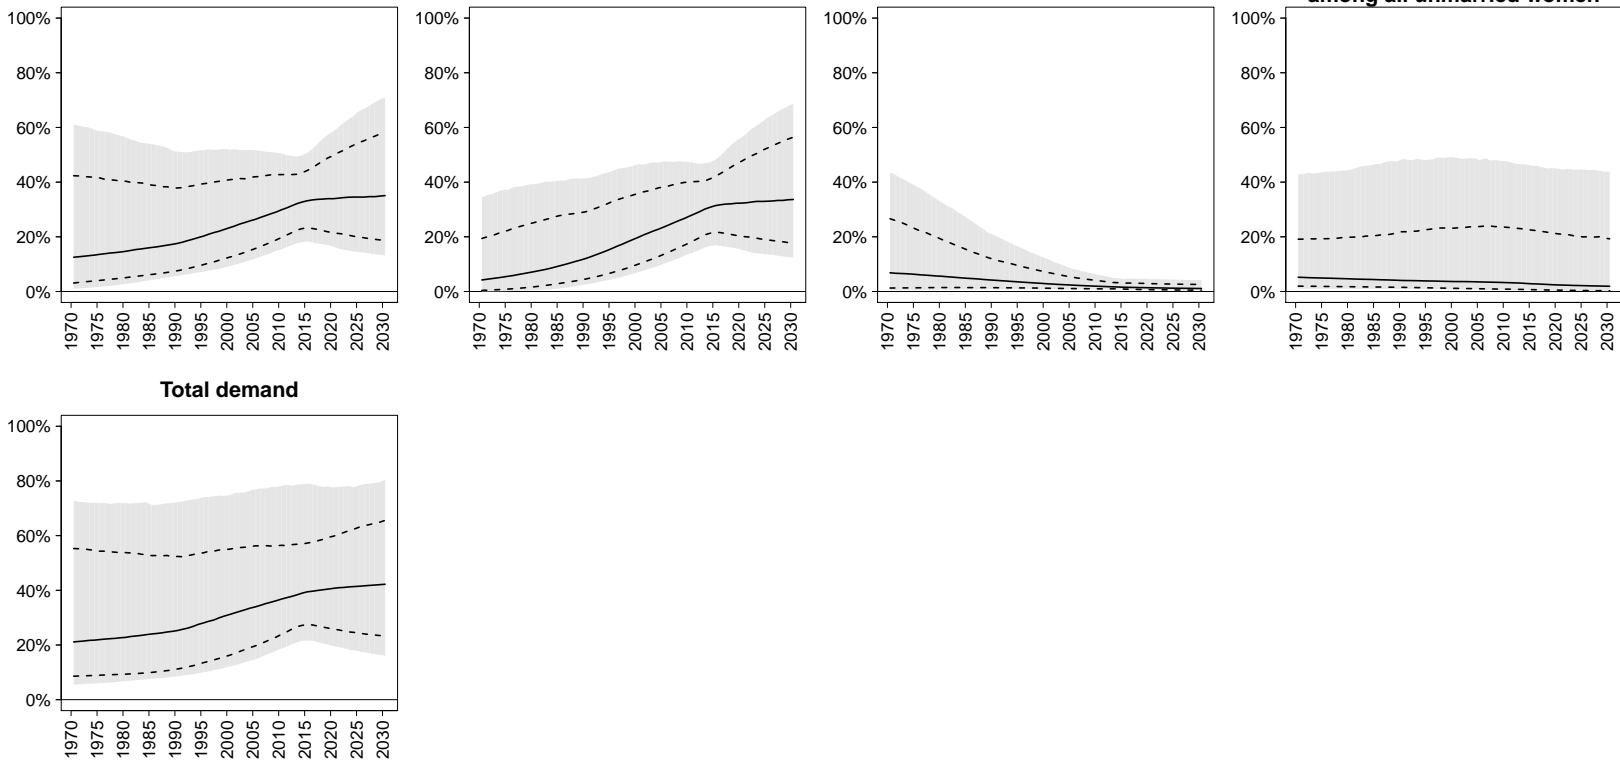

Uzbekistan --- All women

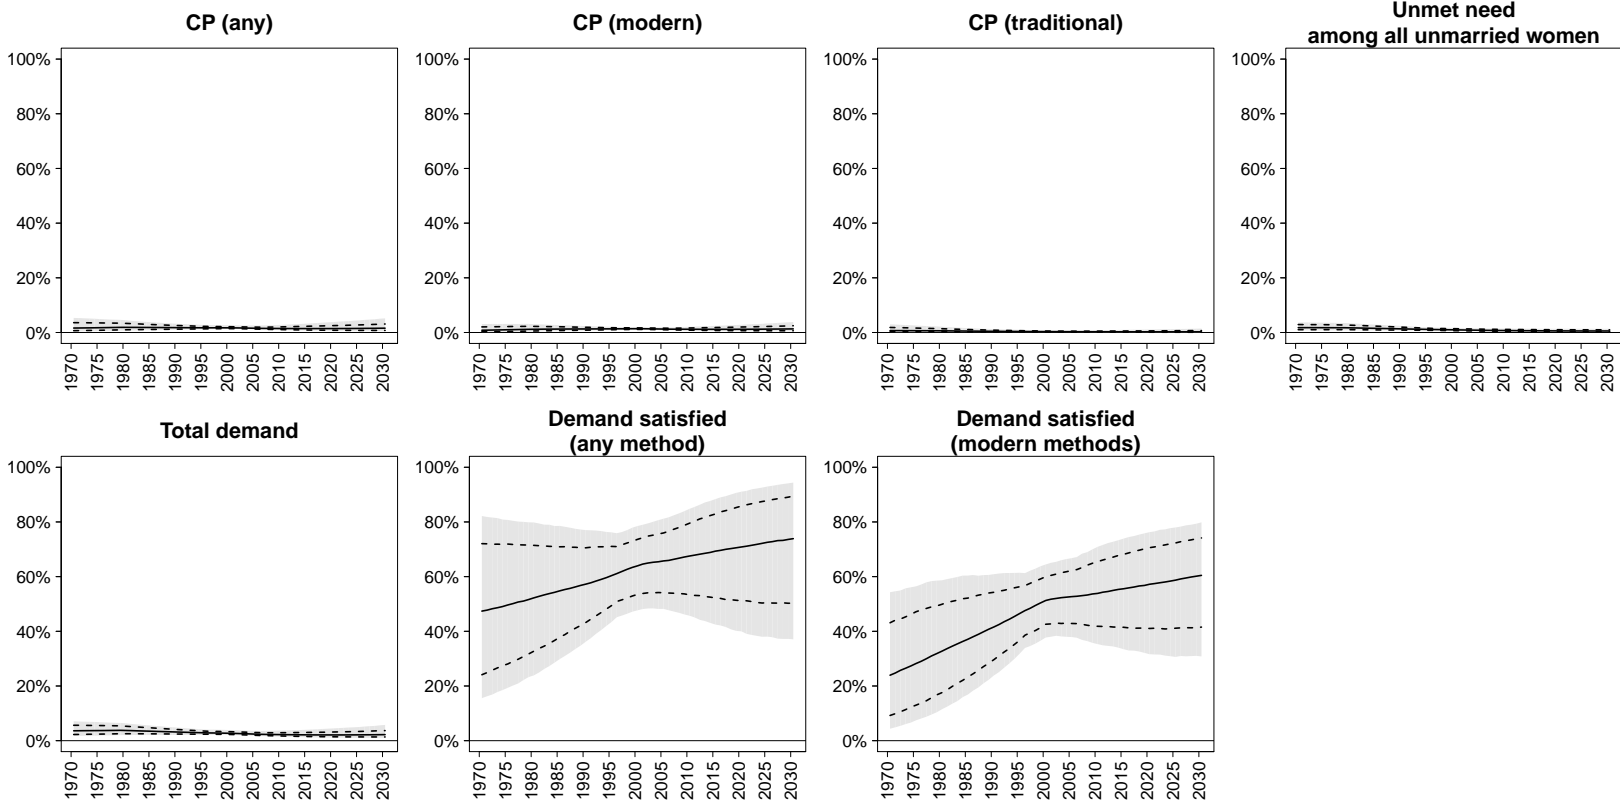

Viet Nam --- All women

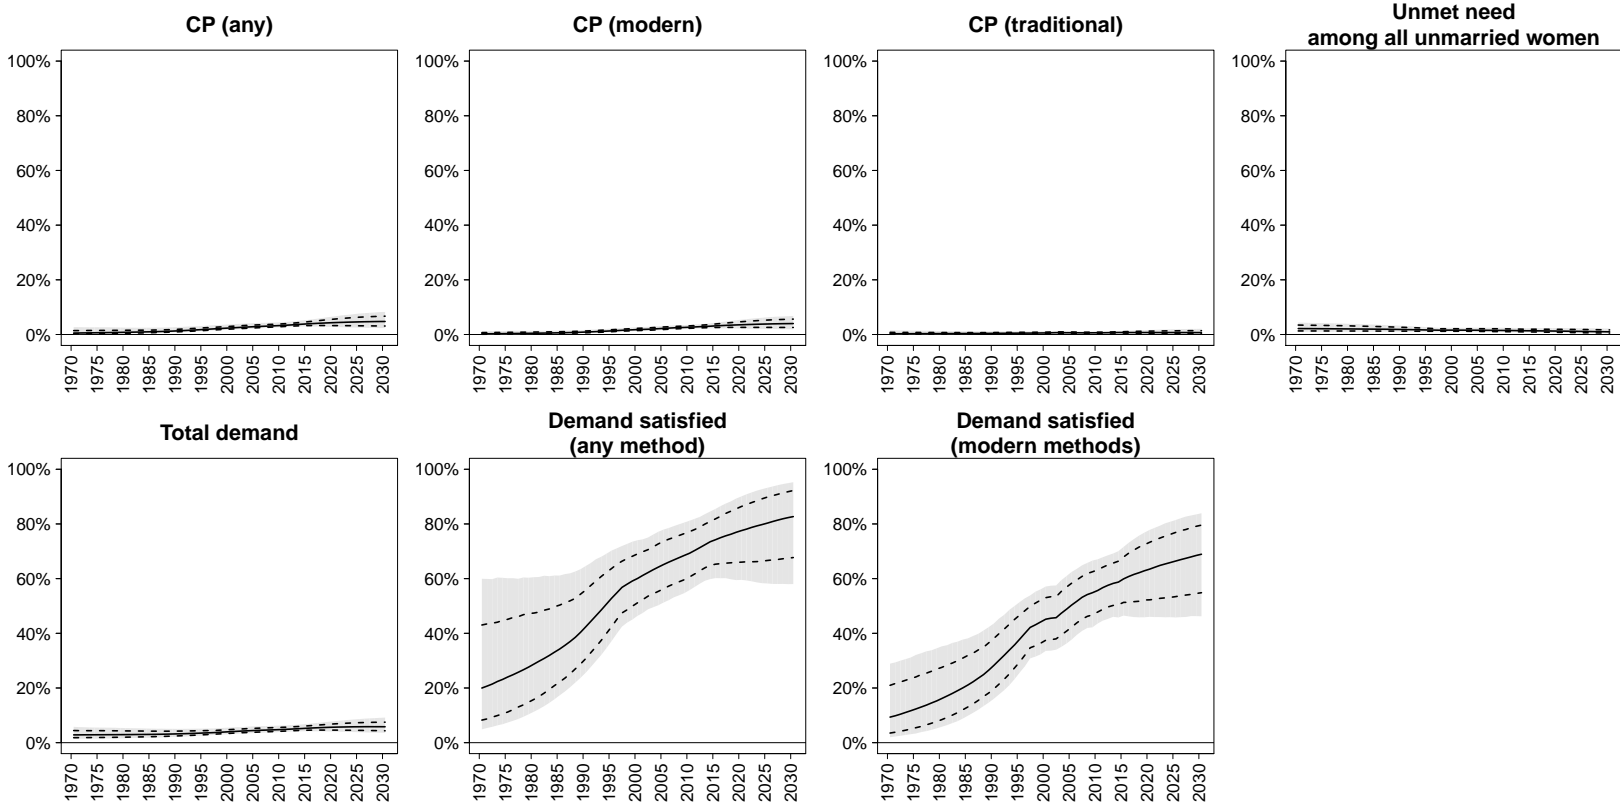

Zambia ---- All women

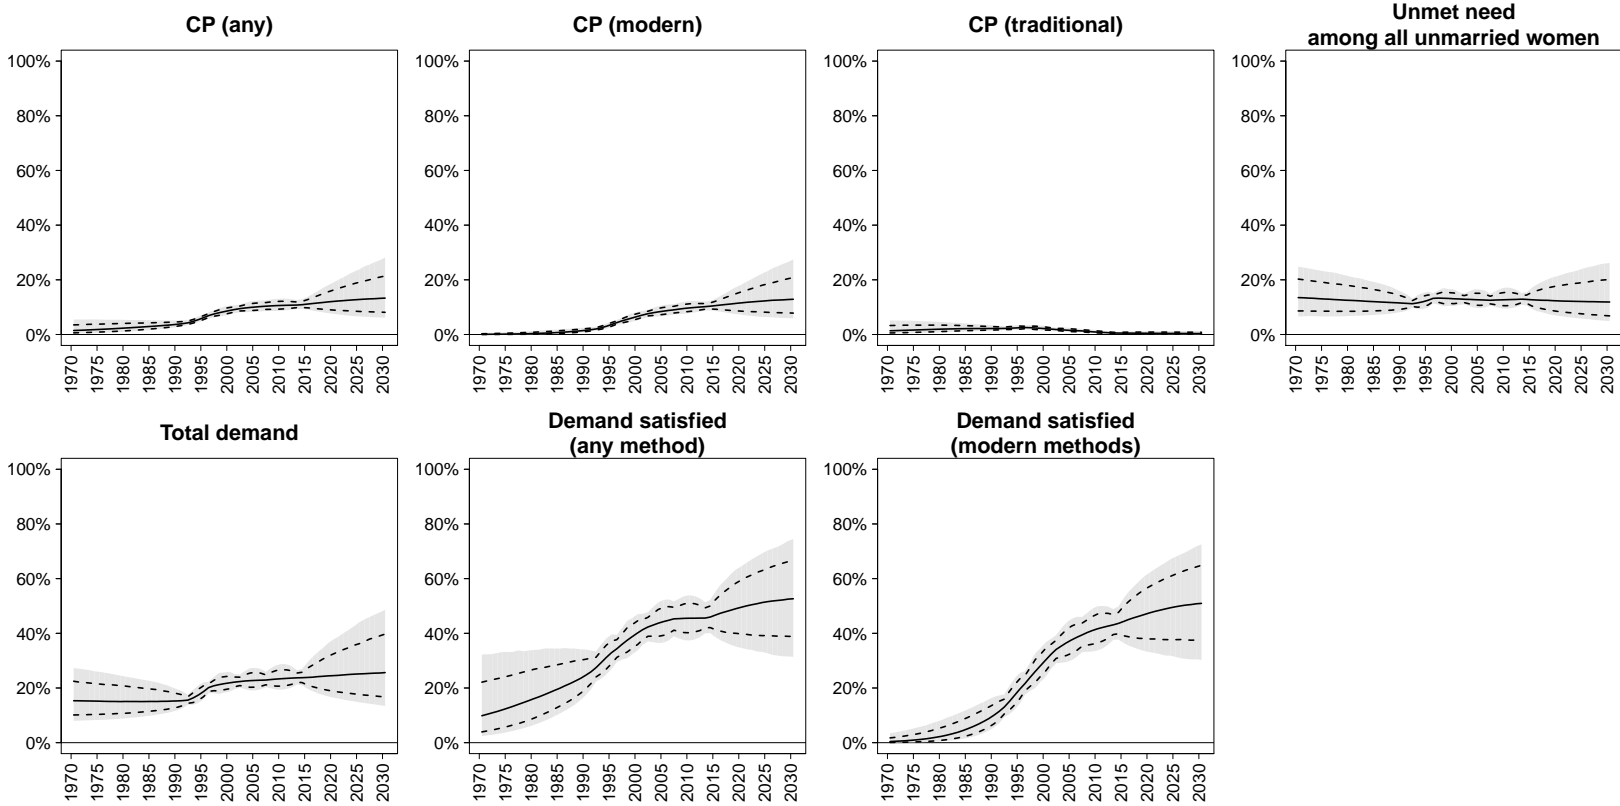



Zimbabwe --- All women

CP (any)

CP (modern)

CP (traditional)

Unmet need among all unmarried women

Total demand

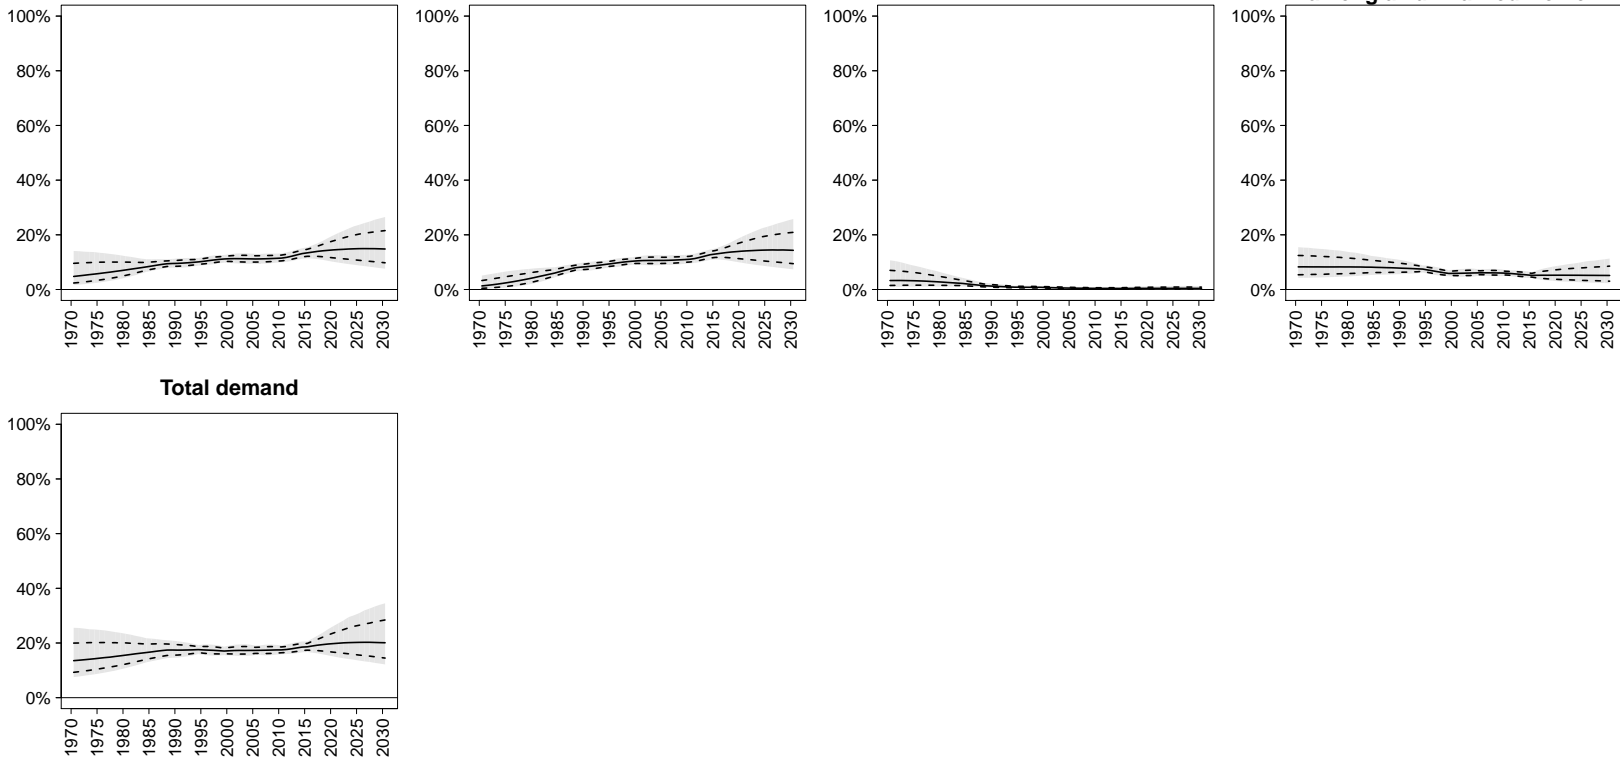

## References

Pawlowsky-Glahn, V., J. J. Egozcue and R. Tolosana-Delgado (2015). *Modeling and Analysis of Compositional Data: Modeling and Analysis of Compositional Data*. New York, NY: John Wiley & Sons, Incorporated.
