# Supplementary material for: Contraceptive use and needs among adolescent women aged 15–19: Regional and global estimates and projections from 1990 to 2030 from a Bayesian hierarchical modelling study
Source: PLoS One. 2021 Mar 4;16(3):e0247479. doi: 10.1371/journal.pone.0247479 (PMC7932081; doi:10.1371/journal.pone.0247479)
Supplement: S3 Data — (CSV) [file pone.0247479.s006.csv]

In.union	Catalog.ID	Age..range	Note.on.data	Note.on.methods	Note.on.country	Note.on.population	Contraceptive.use.ANY	Contraceptive.use.MODERN	Contraceptive.use.TRADITIONAL	Unmet	GEO.biases..unknown.direction.	Non.pregnant.and.other.positive.biases	Negative.bias	Population.type	age.cat.bias	Modern.method.bias	Folk.method.positive.bias	Absence.of.probing.questions.bias...1	ISO.code	Country	Start.year_excel_format	End.year_excel_format	Start.year	End.year	Source.name	Data.series.type	EXCLUDE1isyes	SE.logR.modern.nouse	SE.logR.trad.nouse	SE.logR.unmet.noneed	SE.modern	SE.trad	SE.unmet
0	41	15-19	NA	NA	NA	NA	12.22037578	10.99750014	1.222875639	NA	NA	NA	NA	UW	0	NA	NA	1	694	Sierra Leone	01/10/2005	30/11/2005	2005.75	2005.91	2005 MICS	MICS	0	NA	NA	NA	NA	NA	NA
0	43	15-19	NA	NA	NA	NA	24.37449877	23.72726207	0.647236705	4.782968778	NA	NA	NA	UW	0	NA	NA	0	516	Namibia	01/11/2006	31/03/2007	2006.83	2007.24	2006-2007 DHS	DHS	0	0.072723627	0.321149282	0.110362712	0.013162596	0.002066406	0.0050163
0	49	15-19	NA	NA	NA	NA	8.158252704	7.565615408	0.592637295	4.865992185	NA	NA	NA	UW	0	NA	NA	0	214	Dominican Republic	01/03/2007	30/08/2007	2007.16	2007.66	2007 DHS	DHS	0	0.097766658	0.384019511	0.114094185	0.00684185	0.002263451	0.005280794
0	108	15-19	Estimated from data reported for all women and married/in-union women.	NA	NA	NA	1.002597403	NA	NA	NA	NA	NA	NA	UW	0	NA	NA	0	52	Barbados	NA	NA	1980.25	1980.75	1980-1981 CPS	CPS	0	NA	NA	NA	NA	NA	NA
0	136	15-19	NA	NA	NA	NA	7.166664694	6.258285555	0.908379139	NA	NA	NA	NA	UW	0	NA	NA	1	854	Burkina Faso	29/03/2006	14/06/2006	2006.24	2006.45	2006 MICS	MICS	0	NA	NA	NA	NA	NA	NA
0	148	15-19	NA	NA	NA	NA	0.339135612			NA	NA	NA	NA	UW	0	NA	NA	1	108	Burundi	19/09/2005	31/12/2005	2005.72	2006	2005 MICS	MICS	0	NA	NA	NA	NA	NA	NA
0	155	15-19	Estimated from data reported for all women and married/in-union women.	NA	NA	NA	12.59954874	11.01597473	1.583574007	NA	NA	NA	NA	UW	0	NA	NA	0	132	Cabo Verde	01/03/1998	31/08/1998	1998.16	1998.66	1998 DHS-RHS	DHS	0	NA	NA	NA	NA	NA	NA
0	166	15-19	NA	NA	NA	NA	6.609967788	5.605245508	1.00472228	NA	NA	NA	NA	UW	0	NA	NA	1	288	Ghana	01/08/2006	31/10/2006	2006.58	2006.83	2006 MICS	MICS	0	NA	NA	NA	NA	NA	NA
0	170	15-19	NA	NA	NA	NA	8.722590248	8.395666159	0.326924089	1.378150715	NA	NA	NA	UW	0	NA	NA	0	804	Ukraine	01/07/2007	30/11/2007	2007.5	2007.91	2007 DHS	DHS	0	0.157515148	0.584274014	0.424815706	0.012119747	0.001905597	0.005782162
0	172	15-19	Estimated from data reported for all women and married/in-union women.	Traditional methods include folk methods.	NA	NA	1.105536913	0.603020134	0.502516779	NA	NA	NA	NA	UW	0	NA	Including folk methods.	0	116	Cambodia	01/05/1998	31/07/1998	1998.33	1998.58	1998 DHS-NS	National survey	0	NA	NA	NA	NA	NA	NA
0	173	15-19	Estimated from data reported for all women and married/in-union women.	Traditional methods include folk methods.	NA	NA	0.508958567	0.340649496	0.168309071	NA	NA	NA	NA	UW	0	NA	Including folk methods.	0	320	Guatemala	01/04/2002	30/11/2002	2002.25	2002.91	2002 ENSMI	RHS	0	NA	NA	NA	NA	NA	NA
0	175	15-19	NA	NA	NA	NA	0.191497296			NA	NA	NA	NA	UW	0	NA	NA	1	764	Thailand	01/12/2005	28/02/2006	2005.92	2006.16	2005-2006 MICS	MICS	0	NA	NA	NA	NA	NA	NA
0	176	15-19	NA	NA	NA	NA	22.05558874	20.22938015	1.826208587	NA	NA	NA	NA	UW	0	NA	NA	1	624	Guinea-Bissau	12/05/2006	12/06/2006	2006.36	2006.44	2006 MICS	MICS	0	NA	NA	NA	NA	NA	NA
0	207	15-19	NA	NA	NA	NA	0.639457552			1.228258121	NA	NA	NA	UW	0	NA	NA	0	320	Guatemala	01/11/1998	31/05/1999	1998.83	1999.41	1998-1999 DHS Interim	National survey	0	0.766102946	NaN	0.445414703	0.004853658	0	0.004906445
0	645	15-19	NA	NA	NA	NA	5.761602255	5.486405497	0.275196758	9.764591539	NA	NA	NA	UW	0	NA	NA	0	894	Zambia	01/04/2007	31/10/2007	2007.25	2007.83	2007 DHS	DHS	0	NA	NA	NA	NA	NA	NA
0	647	15-19	NA	NA	NA	NA	12.35647387	10.7279022	1.62857167	26.72327237	NA	NA	NA	UW	0	NA	NA	0	430	Liberia	01/12/2006	30/04/2007	2006.92	2007.33	2007 DHS	DHS	0	0.139942396	0.280805777	0.078204225	0.013237357	0.004418397	0.014982401
0	652	15-19	NA	NA	NA	NA	0.321433133			NA	NA	NA	NA	UW	0	NA	NA	1	417	Kyrgyzstan	18/12/2005	03/02/2006	2005.96	2006.09	2005-2006 MICS	MICS	0	0.393236563	NaN	NaN	5.42E-04	0	0
0	666	15-19	NA	NA	NA	NA	13.00336663			NA	NA	NA	NA	UW	0	NA	NA	1	112	Belarus	01/11/2005	31/12/2005	2005.83	2006	2005 MICS	MICS	0	NA	NA	NA	NA	NA	NA
0	669	15-19	NA	NA	NA	NA	20.49776767	18.80444478	1.693322893	NA	NA	NA	NA	UW	0	NA	NA	1	768	Togo	10/05/2006	24/06/2006	2006.35	2006.48	2006 MICS	MICS	0	NA	NA	NA	NA	NA	NA
0	670	15-19	Estimated from data reported for all women and married/in-union women.	NA	NA	NA	0.744475524	0.101678322	0.642797203	NA	NA	NA	NA	UW	0	NA	NA	0	598	Papua New Guinea	24/06/1996	04/08/1997	1996.48	1997.59	1996 DHS	National survey	0	NA	NA	NA	NA	NA	NA
0	675	15-19	Estimated from data reported for all women and married/in-union women.	NA	NA	NA	2.497643098	0.90513468	1.592508418	NA	NA	NA	NA	UW	0	NA	NA	0	496	Mongolia	NA	NA	1998.25	1998.75	1998 RHS	National survey	0	NA	NA	NA	NA	NA	NA
0	676	15-19	Estimated from data reported for all women and married/in-union women.	NA	NA	NA	0.58829932	0.105986395	0.482312925	NA	NA	NA	NA	UW	0	NA	NA	0	218	Ecuador	20/07/1989	01/10/1989	1989.55	1989.75	1989 ENDEMAIN-RHS	RHS	0	NA	NA	NA	NA	NA	NA
0	694	15-19	NA	NA	NA	NA	12.34079221	5.895510956	6.445281258	5.78532951	NA	NA	NA	UW	0	NA	NA	0	204	Benin	01/08/2006	30/11/2006	2006.58	2006.91	2006 DHS	DHS	0	0.093649029	0.094151435	0.093259446	0.00210288	0.002651873	0.002447176
0	721	15-19	NA	NA	NA	NA	0.0125			NA	NA	NA	NA	UW	0	NA	NA	1	860	Uzbekistan	01/03/2006	15/05/2006	2006.16	2006.37	2006 MICS	MICS	0	NA	NA	NA	NA	NA	NA
0	724	15-19	NA	NA	NA	NA	0.0903	0.0415	0.0488	NA	NA	NA	NA	UW	0	NA	NA	1	762	Tajikistan	01/09/2005	31/10/2005	2005.67	2005.83	2005 MICS	MICS	0	NA	NA	NA	NA	NA	NA
0	738	15-19	NA	NA	NA	NA	4.5116786	3.020263311	1.491415288	NA	NA	NA	NA	UW	0	NA	NA	0	862	Venezuela (Bolivarian Republic of)	NA	NA	1998.25	1998.75	1998 ENPOFAM	National survey	0	NA	NA	NA	NA	NA	NA
0	830	15-19	Estimated from data reported for all women and married/in-union women.	Traditional methods include folk methods.	NA	NA	5.98631699	5.530216648	0.456100342	NA	NA	NA	NA	UW	0	NA	Including folk methods.	0	800	Uganda	01/08/2004	31/01/2005	2004.58	2005.08	2004-2005 AIS	National survey	0	NA	NA	NA	NA	NA	NA
0	831	15-19	NA	NA	NA	NA	6.809223933	5.641554685	1.167669248	10.9104249	NA	NA	NA	UW	0	NA	NA	0	834	United Republic of Tanzania	01/09/1999	30/11/1999	1999.67	1999.91	1999 RCHS	DHS	0	0.282569247	0.406953251	0.162689653	0.014244005	0.003815777	0.013915396
0	832	15-19	NA	NA	NA	NA	2.70010445			NA	NA	NA	NA	UW	0	NA	NA	1	496	Mongolia	01/11/2005	31/12/2005	2005.83	2006	2005 MICS	MICS	0	NA	NA	NA	NA	NA	NA
0	1669	15-19	NA	NA	NA	NA	3.865445342	3.134990675	0.730454667	1.69909404	NA	NA	NA	UW	0	NA	NA	0	398	Kazakhstan	01/07/1999	30/09/1999	1999.5	1999.75	1999 DHS	DHS	0	0.241986226	0.492922124	0.340255172	0.003958378	0.002024442	0.00414053
0	1671	15-19	NA	NA	NA	NA	1.606275542	0.773387844	0.832887698	1.206683239	NA	NA	NA	UW	0	NA	NA	0	214	Dominican Republic	01/07/1991	30/11/1991	1991.5	1991.91	1991 DHS	DHS	0	0.433978696	0.574157405	0.296813771	0.003297658	0.00249889	0.00342614
0	1672	15-19	NA	NA	NA	NA	0.638666637			NA	NA	NA	NA	UW	0	NA	NA	0	222	El Salvador	01/05/1985	31/07/1985	1985.33	1985.58	1985 DHS	DHS	0	NA	NA	NA	NA	NA	NA
0	1674	15-19	NA	NA	NA	NA	28.10671415	5.860374446	22.24633971	6.831304262	NA	NA	NA	UW	0	NA	NA	0	120	Cameroon	01/02/1998	30/06/1998	1998.08	1998.49	1998 DHS	DHS	0	0.1603007	0.111942141	0.150947696	0.006280519	0.015133747	0.008238231
0	1675	15-19	NA	NA	NA	NA	1.806248954	0.843119028	0.963129927	3.338064544	NA	NA	NA	UW	0	NA	NA	0	148	Chad	01/12/1996	31/07/1997	1996.92	1997.58	1996-1997 DHS	DHS	0	0.272653843	0.310575187	0.18952759	0.002198521	0.002949697	0.005762986
0	1676	15-19	NA	NA	NA	NA	10.28866208	9.991124917	0.297537164	NA	NA	NA	NA	UW	0	NA	NA	0	426	Lesotho	13/05/2001	30/06/2001	2001.36	2001.49	2001 DS	National survey	0	NA	NA	NA	NA	NA	NA
0	1677	15-19	Estimated from data reported for all women and married/in-union women.	NA	NA	NA	5.591145038	4.324427481	1.266717557	NA	NA	NA	NA	UW	0	NA	NA	0	834	United Republic of Tanzania	01/07/1994	30/09/1994	1994.5	1994.75	1994 KAP Survey	National survey	0	NA	NA	NA	NA	NA	NA
0	1678	15-19	NA	NA	NA	NA	2.791492016	0.756385804	2.035106213	NA	NA	NA	NA	UW	0	NA	NA	0	834	United Republic of Tanzania	01/10/1991	31/03/1992	1991.75	1992.25	1991-1992 DHS	DHS	0	0.322457813	0.221350232	0.179318532	0.00181576	0.003794614	0.005573338
0	1679	15-19	NA	NA	NA	NA	3.873669718	2.770408331	1.103261387	11.15368242	NA	NA	NA	UW	0	NA	NA	0	834	United Republic of Tanzania	01/07/1996	30/11/1996	1996.5	1996.91	1996 DHS	DHS	0	0.215698917	0.245224585	0.101205908	0.002989704	0.002423778	0.005495424
0	1680	15-19	NA	NA	NA	NA	0.521194004	0.212123239	0.309070764	2.439862905	NA	NA	NA	UW	0	NA	NA	0	562	Niger	01/03/1998	31/07/1998	1998.16	1998.58	1998 DHS	DHS	0	0.617378036	0.702468616	0.364758724	9.75E-05	3.05E-04	0.008073018
0	1682	15-19	NA	NA	NA	NA	1.374856588	0.926929036	0.447927551	NA	NA	NA	NA	UW	0	NA	NA	0	466	Mali	01/05/2006	31/12/2006	2006.33	2007	2006 DHS	DHS	0	0.300439173	0.505541976	0.217591638	8.09E-04	4.35E-04	0.001576598
0	1683	15-19	NA	NA	NA	NA	0.348837209			NA	NA	NA	NA	UW	0	NA	NA	0	218	Ecuador	01/01/1987	31/03/1987	1987	1987.24	1987 DHS	DHS	0	NA	NA	NA	NA	NA	NA
0	1684	15-19	NA	NA	NA	NA	4.71081792			3.708449674	NA	NA	NA	UW	0	NA	NA	0	214	Dominican Republic	01/08/1999	31/12/1999	1999.58	2000	1999 DHS	DHS	0	0.457965371	NaN	0.488788675	0.020557607	0	0.017233582
0	1685	15-19	NA	NA	NA	NA	2.900254341	2.302460034	0.597794307	1.799414351	NA	NA	NA	UW	0	NA	NA	0	214	Dominican Republic	01/09/1996	31/12/1996	1996.67	1997	1996 DHS	DHS	0	0.21704772	0.414434627	0.241570003	0.004618717	0.001997824	0.003817587
0	1686	15-19	NA	NA	NA	NA	1.717450148	0.964559813	0.752890335	0.828135753	NA	NA	NA	UW	0	NA	NA	0	600	Paraguay	01/05/1990	31/08/1990	1990.33	1990.66	1990 DHS	DHS	0	0.313921677	0.395653592	0.326444546	0.002999881	0.002957282	0.002677097
0	1692	15-19	NA	NA	NA	NA	4.520076806	3.13168609	1.388390716	5.942535716	NA	NA	NA	UW	0	NA	NA	0	404	Kenya	01/04/2003	30/09/2003	2003.25	2003.75	2003 DHS	DHS	0	0.169343441	0.266110547	0.11860376	0.00201631	0.001988992	0.00343887
0	1694	15-19	NA	NA	NA	NA	0.775546182	0.745041901	0.0305	1.085240723	NA	NA	NA	UW	0	NA	NA	0	231	Ethiopia	01/02/2000	31/05/2000	2000.08	2000.41	2000 DHS	DHS	0	0.390846897	0.529755173	0.272506954	0.002080292	1.13E-04	0.002399267
0	1695	15-19	NA	NA	NA	NA	13.29051992			8.142876526	NA	NA	NA	UW	0	NA	NA	0	748	Eswatini	01/07/2006	28/02/2007	2006.5	2007.16	2006-2007 DHS	DHS	0	0.10013068	NaN	0.121534199	0.011539201	0	0.008945559
0	1696	15-19	NA	NA	NA	NA	5.244664354	4.826347423	0.418316931	9.834347101	NA	NA	NA	UW	0	NA	NA	0	894	Zambia	01/11/2001	31/05/2002	2001.83	2002.41	2001-2002 DHS	DHS	0	0.150457104	0.395952005	0.099171461	0.003139761	4.47E-04	0.004309813
0	1697	15-19	NA	NA	NA	NA	3.804994055	2.615933413	1.189060642	NA	NA	NA	NA	UW	0	NA	NA	0	716	Zimbabwe	01/09/1988	31/01/1989	1988.67	1989.08	1988 DHS	DHS	0	NA	NA	NA	NA	NA	NA
0	1698	15-19	NA	NA	NA	NA	2.657955364			2.678531205	NA	NA	NA	UW	0	NA	NA	0	716	Zimbabwe	01/08/2005	28/02/2006	2005.58	2006.16	2005-2006 DHS	DHS	0	0.171942969	NaN	0.199806022	0.001529224	0	0.001598994
0	1699	15-19	NA	NA	NA	NA	4.261568379	3.361491034	0.900077345	10.59547929	NA	NA	NA	UW	0	NA	NA	0	894	Zambia	01/07/1996	31/01/1997	1996.5	1997.08	1996 DHS	DHS	0	0.146748115	0.263899292	0.091981607	0.004476713	0.001929632	0.007857058
0	1700	15-19	NA	NA	NA	NA	2.591511535	2.493567332	0.0979	2.760925699	NA	NA	NA	UW	0	NA	NA	0	716	Zimbabwe	01/09/1999	31/12/1999	1999.67	2000	1999 DHS	DHS	0	0.183726316	0.716282087	0.184717861	0.003665574	7.00E-04	0.004602867
0	1701	15-19	NA	NA	NA	NA	2.823130832	2.377595884	0.445534949	3.601122416	NA	NA	NA	UW	0	NA	NA	0	716	Zimbabwe	01/07/1994	30/11/1994	1994.5	1994.91	1994 DHS	DHS	0	0.197612507	0.452107857	0.147393715	0.00398206	0.001998897	0.004775383
0	1705	15-19	NA	NA	NA	NA	0.25207632	0.210740453	0.0413	1.111400795	NA	NA	NA	UW	0	NA	NA	0	686	Senegal	01/02/2005	31/05/2005	2005.08	2005.41	2005 DHS	DHS	0	0.561434847	0.739142579	0.248701966	0.001180676	3.05E-04	0.002733763
0	1707	15-19	NA	NA	NA	NA	2.242744063	1.715039578	0.527704485	1.978891821	NA	NA	NA	UW	0	NA	NA	0	174	Comoros	01/03/1996	31/05/1996	1996.16	1996.41	1996 DHS	DHS	0	0.310530611	0.492519707	0.240314479	0.005232859	0.002584405	0.004656723
0	1708	15-19	NA	NA	NA	NA	5.586479741	0.358584865	5.227894876	NA	NA	NA	NA	UW	0	NA	NA	0	450	Madagascar	01/05/1992	30/11/1992	1992.33	1992.91	1992 DHS	DHS	0	0.433511434	0.156305872	NaN	0.001548752	0.007691106	0
0	1709	15-19	NA	NA	NA	NA	38.60603318	10.41479125	28.19124193	8.825016659	NA	NA	NA	UW	0	NA	NA	0	178	Congo	01/07/2005	30/11/2005	2005.5	2005.91	2005 DHS	DHS	0	0.128722993	0.080230598	0.118483937	0.011672634	0.015761591	0.009166909
0	1710	15-19	NA	NA	NA	NA	4.032189677	3.246203156	0.785986521	3.689632164	NA	NA	NA	UW	0	NA	NA	0	214	Dominican Republic	01/07/2002	31/12/2002	2002.5	2003	2002 DHS	DHS	0	0.131817158	0.292897474	0.120894815	0.004142872	0.002285211	0.004281085
0	1711	15-19	NA	NA	NA	NA	0.918358358	0.651879683	0.266478675	NA	NA	NA	NA	UW	0	NA	NA	0	214	Dominican Republic	01/09/1986	31/12/1986	1986.67	1987	1986 DHS	DHS	0	NA	NA	NA	NA	NA	NA
0	1712	15-19	NA	NA	NA	NA	1.5078862	1.231978916	0.275907284	NA	NA	NA	NA	UW	0	NA	NA	0	170	Colombia	01/09/1986	31/12/1986	1986.67	1987	1986 DHS	DHS	0	NA	NA	NA	NA	NA	NA
0	1714	15-19	NA	NA	NA	NA	5.851345177	3.653486624	2.197858554	9.433321024	NA	NA	NA	UW	0	NA	NA	0	466	Mali	01/01/2001	31/05/2001	2001	2001.41	2001 DHS	DHS	0	0.188202122	0.225738117	0.13296857	0.004385633	0.001341166	0.006476065
0	1715	15-19	NA	NA	NA	NA	9.088151768	3.966773073	5.121378695	9.949300302	NA	NA	NA	UW	0	NA	NA	0	466	Mali	01/11/1995	31/05/1996	1995.83	1996.41	1995-1996 DHS	DHS	0	0.174838301	0.169302013	0.133615249	0.003741923	0.004065904	0.005822558
0	1716	15-19	NA	NA	NA	NA	0.31373445	0.10457815	0.2091563	NA	NA	NA	NA	UW	0	NA	NA	0	108	Burundi	01/03/1987	31/07/1987	1987.16	1987.58	1987 DHS	DHS	0	NA	NA	NA	NA	NA	NA
0	1717	15-19	NA	NA	NA	NA	0.275959584	0.20181455	0.0741	1.241976712	NA	NA	NA	UW	0	NA	NA	0	646	Rwanda	01/02/2005	31/07/2005	2005.08	2005.58	2005 DHS	DHS	0	0.425984893	0.709876583	0.182777694	1.76E-04	8.25E-05	0.001035133
0	1720	15-19	Estimated from data reported for all women and married/in-union women.	NA	NA	NA	25.74404762			NA	NA	NA	NA	UW	0	NA	NA	0	710	South Africa	01/10/2003	31/08/2004	2003.75	2004.66	2003 DHS	DHS	0	NA	NA	NA	NA	NA	NA
0	1721	15-19	NA	NA	NA	NA	28.45914931	27.87629716	0.582852157	7.447501935	NA	NA	NA	UW	0	NA	NA	0	710	South Africa	01/01/1998	30/09/1998	1998	1998.75	1998 DHS	DHS	0	0.061860269	0.320026441	0.096807748	0.007882762	9.92E-04	0.003696686
0	1723	15-19	NA	NA	NA	NA	4.810439228	3.010601927	1.799837301	6.833031896	NA	NA	NA	UW	0	NA	NA	0	800	Uganda	01/03/1995	31/08/1995	1995.16	1995.66	1995 DHS	DHS	0	0.190259258	0.263898077	0.170640775	0.003307414	0.002864436	0.007562525
0	1729	15-19	NA	NA	NA	NA	5.614020171	1.308638607	4.305381564	8.995232386	NA	NA	NA	UW	0	NA	NA	0	450	Madagascar	01/09/1997	31/12/1997	1997.67	1998	1997 DHS	DHS	0	0.256038227	0.153577431	0.11465289	0.002407666	0.004837036	0.008139539
0	1730	15-19	NA	NA	NA	NA	1.476377953	0.787401575	0.688976378	2.460629921	NA	NA	NA	UW	0	NA	NA	0	686	Senegal	01/11/1992	31/08/1993	1992.83	1993.66	1992-1993 DHS	DHS	0	0.393442966	0.428976127	0.212996069	0.003073846	0.002935419	0.005110735
0	1731	15-19	NA	NA	NA	NA	1.412620051	0.524825774	0.887794278	NA	NA	NA	NA	UW	0	NA	NA	0	562	Niger	01/03/1992	30/06/1992	1992.16	1992.49	1992 DHS	DHS	0	0.424813195	0.444128232	NaN	0.002218757	0.003907724	0
0	1732	15-19	NA	NA	NA	NA	7.902518228	2.389032677	5.513485551	7.600903252	NA	NA	NA	UW	0	NA	NA	0	140	Central African Republic	01/09/1994	31/03/1995	1994.67	1995.24	1994-1995 DHS	DHS	0	0.223961033	0.185222268	0.133880071	0.003539373	0.007051245	0.008603022
0	1733	15-19	NA	NA	NA	NA	0.591525444	0.455819571	0.135705874	NA	NA	NA	NA	UW	0	NA	NA	0	484	Mexico	01/02/1987	31/05/1987	1987.08	1987.41	1987 DHS	DHS	0	NA	NA	NA	NA	NA	NA
0	1734	15-19	NA	NA	NA	NA	5.992417498	3.091092581	2.901324917	7.583012281	NA	NA	NA	UW	0	NA	NA	0	450	Madagascar	01/11/2003	31/03/2004	2003.83	2004.25	2003-2004 DHS	DHS	0	0.222297054	0.250296482	0.18237394	0.006065833	0.005281577	0.00777219
0	1735	15-19	NA	NA	NA	NA	23.8882723	8.605012842	15.28325945	10.10904727	NA	NA	NA	UW	0	NA	NA	0	768	Togo	01/02/1998	31/05/1998	1998.08	1998.41	1998 DHS	DHS	0	0.120451899	0.10143361	0.110893002	0.00921075	0.012562356	0.009964849
0	1736	15-19	NA	NA	NA	NA	0.161941561			0.728200993	NA	NA	NA	UW	0	NA	NA	0	562	Niger	01/01/2006	31/05/2006	2006	2006.41	2006 DHS	DHS	0	0.71715165	NaN	0.390195887	1.44E-04	0	0.001844078
0	1737	15-19	NA	NA	NA	NA	31.67352873	12.63544756	19.03808116	13.22481181	NA	NA	NA	UW	0	NA	NA	0	266	Gabon	01/07/2000	31/01/2001	2000.5	2001.08	2000 DHS	DHS	0	0.119122443	0.084029021	0.119497914	0.012676441	0.012347871	0.012843302
0	1738	15-19	Estimated from data reported for all women and married/in-union women.	NA	NA	NA	1.282142857	0.641071429	0.641071429	NA	NA	NA	NA	UW	0	NA	NA	0	324	Guinea	01/05/1992	31/07/1992	1992.33	1992.58	1992 DHS	DHS	0	NA	NA	NA	NA	NA	NA
0	1739	15-19	NA	NA	NA	NA	6.997812655	3.551278516	3.446534139	7.181977196	NA	NA	NA	UW	0	NA	NA	0	324	Guinea	01/05/1999	31/07/1999	1999.33	1999.58	1999 DHS	DHS	0	0.17376352	0.19701964	0.13621166	0.00348537	0.004630324	0.005851241
0	1740	15-19	NA	NA	NA	NA	13.11263192	8.695277778	4.417354142	9.331911293	NA	NA	NA	UW	0	NA	NA	0	324	Guinea	01/02/2005	30/06/2005	2005.08	2005.49	2005 DHS	DHS	0	0.189047624	0.209123521	0.120881584	0.010634721	0.004545198	0.005389653
0	1741	15-19	NA	NA	NA	NA	1.286764706	0.735294118	0.551470588	NA	NA	NA	NA	UW	0	NA	NA	0	780	Trinidad and Tobago	01/05/1987	31/08/1987	1987.33	1987.66	1987 DHS	DHS	0	NA	NA	NA	NA	NA	NA
0	1742	15-19	NA	NA	NA	NA	8.568184137	2.722141781	5.846042356	0.657813325	NA	NA	NA	UW	0	NA	NA	0	566	Nigeria	01/04/1990	31/10/1990	1990.25	1990.83	1990 DHS	DHS	0	0.190920868	0.196687265	0.3448399	0.003750262	0.008982515	0.001184906
0	1751	15-19	NA	NA	NA	NA	6.944143945	3.560922212	3.383221733	6.105428282	NA	NA	NA	UW	0	NA	NA	0	288	Ghana	01/11/1998	28/02/1999	1998.83	1999.16	1998 DHS	DHS	0	0.198204658	0.229493175	0.157489345	0.004176301	0.003136923	0.005335176
0	1752	15-19	NA	NA	NA	NA	8.519957591	6.327078844	2.192878747	6.555368164	NA	NA	NA	UW	0	NA	NA	0	288	Ghana	01/07/2003	31/10/2003	2003.5	2003.83	2003 DHS	DHS	0	0.144434359	0.252243906	0.142654373	0.002532327	0.001160481	0.002515507
0	1753	15-19	NA	NA	NA	NA	6.083086053	1.038575668	5.044510386	NA	NA	NA	NA	UW	0	NA	NA	0	288	Ghana	01/02/1988	30/06/1988	1988.08	1988.49	1988 DHS	DHS	0	NA	NA	NA	NA	NA	NA
0	1754	15-19	NA	NA	NA	NA	10.90342679	4.205607477	6.697819315	3.271028037	NA	NA	NA	UW	0	NA	NA	0	288	Ghana	01/09/1993	28/02/1994	1993.67	1994.16	1993 DHS	DHS	0	0.208508134	0.161591782	0.237705794	0.008405651	0.010106357	0.007514962
0	1758	15-19	NA	NA	NA	NA	21.92893858	20.5620732	1.366865379	12.87083343	NA	NA	NA	UW	0	NA	NA	0	508	Mozambique	01/08/2003	31/01/2004	2003.58	2004.08	2003 DHS	DHS	1	0.079954148	0.244720507	0.133892196	0.005137643	8.46E-04	0.00355745
0	1759	15-19	NA	NA	NA	NA	2.893490535	2.589047278	0.304443257	3.375421714	NA	NA	NA	UW	0	NA	NA	0	558	Nicaragua	01/09/2001	31/12/2001	2001.67	2002	2001 DHS	DHS	0	0.168240216	0.452355952	0.164112351	0.003087952	0.001328531	0.004702557
0	1761	15-19	NA	NA	NA	NA	10.7987061	5.046638865	5.752067231	8.318134566	NA	NA	NA	UW	0	NA	NA	0	204	Benin	01/08/2001	30/11/2001	2001.58	2001.91	2001 DHS	DHS	0	0.173660496	0.143021173	0.117930602	0.005618187	0.004214753	0.006287048
0	1762	15-19	NA	NA	NA	NA	0.800515591	0.548415773	0.252099818	2.757170909	NA	NA	NA	UW	0	NA	NA	0	148	Chad	23/07/2004	10/12/2004	2004.56	2004.94	2004 DHS	DHS	0	0.372840639	0.659226607	0.292481951	0.002010585	0.001647038	0.00761997
0	1763	15-19	NA	NA	NA	NA	0.110741971			NA	NA	NA	NA	UW	0	NA	NA	0	320	Guatemala	01/09/1987	31/12/1987	1987.67	1988	1987 DHS	DHS	0	NA	NA	NA	NA	NA	NA
0	1764	15-19	NA	NA	NA	NA	2.369545974	1.234474822	1.135071152	NA	NA	NA	NA	UW	0	NA	NA	0	332	Haiti	01/07/1994	31/01/1995	1994.5	1995.08	1994-1995 DHS	DHS	0	0.314132434	0.30640591	NaN	0.003695917	0.003437886	0
0	1765	15-19	NA	NA	NA	NA	3.532345374	2.510172588	1.022172786	4.674822189	NA	NA	NA	UW	0	NA	NA	0	332	Haiti	01/02/2000	31/07/2000	2000.08	2000.58	2000 DHS	DHS	0	0.235002538	0.291428578	0.173734649	0.005751813	0.002949419	0.007805243
0	1766	15-19	NA	NA	NA	NA	2.135364504	0.665003881	1.470360623	1.61760809	NA	NA	NA	UW	0	NA	NA	0	68	Bolivia (Plurinational State of)	01/03/1998	30/09/1998	1998.16	1998.75	1998 DHS	DHS	0	0.31216666	0.194903928	0.172842687	8.54E-04	0.001570996	0.001324518
0	1767	15-19	NA	NA	NA	NA	2.5170767	1.83336065	0.68371605	17.66272909	NA	NA	NA	UW	0	NA	NA	0	508	Mozambique	01/03/1997	31/07/1997	1997.16	1997.58	1997 DHS	DHS	0	0.27936887	0.389719359	0.181640529	0.002797031	0.002495434	0.009288381
0	1768	15-19	NA	NA	NA	NA	0.423472404	0.0142	0.409242378	NA	NA	NA	NA	UW	0	NA	NA	0	68	Bolivia (Plurinational State of)	01/03/1989	31/07/1989	1989.16	1989.58	1989 DHS	DHS	0	NA	NA	NA	NA	NA	NA
0	1769	15-19	NA	NA	NA	NA	1.399610008	0.368055426	1.031554582	2.164386427	NA	NA	NA	UW	0	NA	NA	0	68	Bolivia (Plurinational State of)	01/11/1993	31/05/1994	1993.83	1994.41	1994 DHS	DHS	0	0.432651587	0.260719339	0.192167582	2.81E-04	0.00224804	0.002089357
0	1770	15-19	NA	NA	NA	NA	0.296051229	0.218489576	0.0776	1.063911567	NA	NA	NA	UW	0	NA	NA	0	320	Guatemala	01/06/1995	31/12/1995	1995.41	1996	1995 DHS	DHS	0	0.689466566	0.611231247	0.269831664	0.00143242	4.74E-04	0.002733902
0	1771	15-19	NA	NA	NA	NA	0.515995872	0.103199174	0.412796698	NA	NA	NA	NA	UW	0	NA	NA	0	604	Peru	01/09/1986	31/12/1986	1986.67	1987	1986 DHS	DHS	0	NA	NA	NA	NA	NA	NA
0	1772	15-19	NA	NA	NA	NA	2.247706205	0.791938698	1.455767507	1.185069787	NA	NA	NA	UW	0	NA	NA	0	604	Peru	01/10/1991	31/03/1992	1991.75	1992.25	1991-1992 DHS	DHS	0	0.231005196	0.164582458	0.181351041	0.001526274	0.001989103	0.001751592
0	1773	15-19	NA	NA	NA	NA	2.30886148	1.103141377	1.205720103	1.9380326	NA	NA	NA	UW	0	NA	NA	0	604	Peru	01/08/1996	30/11/1996	1996.58	1996.91	1996 DHS	DHS	0	0.178893083	0.154682746	0.121885221	0.001350782	0.001263992	0.00154873
0	1774	15-19	NA	NA	NA	NA	3.879822491	1.681445525	2.198376966	2.399921498	NA	NA	NA	UW	0	NA	NA	0	604	Peru	01/07/2000	30/11/2000	2000.5	2000.91	2000 DHS	DHS	0	0.127952739	0.114134524	0.115743658	0.00102688	0.001655285	0.00176731
0	1775	15-19	NA	NA	NA	NA	1.512737495	1.455680891	0.0571	2.887787582	NA	NA	NA	UW	0	NA	NA	0	558	Nicaragua	01/12/1997	31/05/1998	1997.92	1998.41	1998 DHS	DHS	0	0.188464578	0.76303091	0.143506542	0.002266183	4.03E-04	0.003575601
0	1776	15-19	NA	NA	NA	NA	4.221629037	1.524832759	2.696796279	1.701549599	NA	NA	NA	UW	0	NA	NA	0	854	Burkina Faso	01/12/1992	31/03/1993	1992.92	1993.24	1993 DHS	DHS	0	0.292805956	0.229803311	0.333058086	0.003779865	0.005754079	0.005516353
0	1777	15-19	NA	NA	NA	NA	7.9084739	6.738030941	1.170442959	5.939248875	NA	NA	NA	UW	0	NA	NA	0	854	Burkina Faso	01/11/1998	31/03/1999	1998.83	1999.24	1998-1999 DHS	DHS	0	0.128823994	0.297396305	0.135073502	0.006615476	0.002811661	0.006583399
0	1778	15-19	NA	NA	NA	NA	21.52498326	9.274239938	12.25074332	12.24610476	NA	NA	NA	UW	0	NA	NA	0	384	CÃ´te d'Ivoire	01/09/1998	31/03/1999	1998.67	1999.24	1998-1999 DHS	DHS	0	0.163661992	0.127547636	0.17431881	0.009482503	0.011545401	0.015073617
0	1779	15-19	NA	NA	NA	NA	22.10348574	6.155639011	15.94784673	NA	NA	NA	NA	UW	0	NA	NA	0	384	CÃ´te d'Ivoire	01/06/1994	30/11/1994	1994.41	1994.91	1994 DHS	DHS	0	0.126283841	0.093163817	NaN	0.007120852	0.01231015	0
0	1780	15-19	NA	NA	NA	NA	11.62715273	2.006005003	9.621147723	5.819604685	NA	NA	NA	UW	0	NA	NA	0	204	Benin	01/06/1996	31/08/1996	1996.42	1996.66	1996 DHS	DHS	0	0.259125776	0.166246683	0.1741404	0.004662775	0.014094391	0.008364238
0	1782	15-19	NA	NA	NA	NA	0.393089301			NA	NA	NA	NA	UW	0	NA	NA	0	417	Kyrgyzstan	01/08/1997	30/11/1997	1997.58	1997.91	1997 DHS	DHS	0	0.707637465	NaN	0.995488567	0.001928308	0	3.45E-04
0	1784	15-19	NA	NA	NA	NA	2.687477263	0.385863689	2.301613574	NA	NA	NA	NA	UW	0	NA	NA	0	466	Mali	01/03/1987	31/08/1987	1987.16	1987.66	1987 DHS	DHS	0	NA	NA	NA	NA	NA	NA
0	1785	15-19	NA	NA	NA	NA	6.084195279	4.976438665	1.107756614	5.541690336	NA	NA	NA	UW	0	NA	NA	0	332	Haiti	01/10/2005	30/06/2006	2005.75	2006.49	2005-2006 DHS	DHS	0	0.174110999	0.265020043	0.114323485	0.008251303	0.002915776	0.005916493
0	1786	15-19	NA	NA	NA	NA	18.65300046	11.35426105	7.298739414	4.696954425	NA	NA	NA	UW	0	NA	NA	0	120	Cameroon	01/02/2004	31/08/2004	2004.08	2004.66	2004 DHS	DHS	0	0.089749582	0.104387653	0.109003541	0.004096358	0.002847292	0.002186867
0	1787	15-19	NA	NA	NA	NA	9.573917402	8.824913992	0.749003409	4.291220582	NA	NA	NA	UW	0	NA	NA	0	854	Burkina Faso	01/06/2003	30/11/2003	2003.41	2003.91	2003 DHS	DHS	0	0.118612534	0.296663786	0.123397051	0.003504156	4.27E-04	0.002382773
0	1788	15-19	NA	NA	NA	NA	2.741639445	2.373958678	0.367680766	2.764714834	NA	NA	NA	UW	0	NA	NA	0	340	Honduras	01/10/2005	31/05/2006	2005.75	2006.41	2005-2006 DHS	DHS	0	0.133700107	0.331196327	0.110846404	0.00246808	6.32E-04	0.002288687
0	1792	15-19	NA	NA	NA	NA	0.0869	0.0552	0.0317	NA	NA	NA	NA	UW	0	NA	NA	0	356	India	01/11/2005	31/08/2006	2005.83	2006.66	2005-2006 NFHS	DHS	0	NA	NA	NA	NA	NA	NA
0	1793	15-19	Estimated from data reported for all women and married/in-union women.	NA	NA	NA	0.102749832	0.098	0.00471	NA	NA	NA	NA	UW	0	NA	NA	0	795	Turkmenistan	01/07/2000	31/10/2000	2000.5	2000.83	2000 DHS	DHS	0	NA	NA	NA	NA	NA	NA
0	1794	15-19	NA	NA	NA	NA	1.943462898	0.706713781	1.236749117	NA	NA	NA	NA	UW	0	NA	NA	0	686	Senegal	01/04/1986	31/07/1986	1986.25	1986.58	1986 DHS	DHS	0	NA	NA	NA	NA	NA	NA
0	1795	15-19	NA	NA	NA	NA	1.587736725	1.117425566	0.470311159	2.79208741	NA	NA	NA	UW	0	NA	NA	0	686	Senegal	01/01/1997	30/04/1997	1997	1997.33	1997 DHS	DHS	0	0.26176799	0.48803502	0.179745544	0.002281114	0.002148909	0.004349798
0	1798	15-19	NA	NA	NA	NA	26.30899414	1.215274941	25.0937192	3.771753004	NA	NA	NA	UW	0	NA	NA	0	120	Cameroon	01/04/1991	30/09/1991	1991.25	1991.75	1991 DHS	DHS	0	0.300409962	0.120997372	0.261902586	0.003015894	0.021385798	0.008974916
0	1799	15-19	NA	NA	NA	NA	10.02865301	9.304594644	0.724058361	6.213226643	NA	NA	NA	UW	0	NA	NA	0	516	Namibia	01/07/1992	30/11/1992	1992.5	1992.91	1992 DHS	DHS	0	0.126609569	0.372766921	0.115220349	0.010693349	0.002682908	0.006647713
0	1802	15-19	NA	NA	NA	NA	6.723250659	5.035403841	1.687846818	NA	NA	NA	NA	UW	0	NA	NA	0	430	Liberia	01/02/1986	31/07/1986	1986.08	1986.58	1986 DHS	DHS	0	NA	NA	NA	NA	NA	NA
0	1803	15-19	Estimated from data reported for all women and married/in-union women.	NA	NA	NA	14.54711212	14.28165345	0.265458664	NA	NA	NA	NA	UW	0	NA	NA	0	72	Botswana	01/08/1988	31/12/1988	1988.58	1989	1988 DHS	DHS	0	NA	NA	NA	NA	NA	NA
0	1804	15-19	NA	NA	NA	NA	3.058105987	1.246843379	1.811262608	NA	NA	NA	NA	UW	0	NA	NA	0	800	Uganda	01/09/1988	28/02/1989	1988.67	1989.16	1988-1989 DHS	DHS	0	NA	NA	NA	NA	NA	NA
0	1807	15-19	NA	NA	NA	NA	21.88502662	21.59547808	0.289548545	8.630994618	NA	NA	NA	UW	0	NA	NA	0	516	Namibia	01/09/2000	31/12/2000	2000.67	2001	2000 DHS	DHS	0	0.099329341	0.486524623	0.132023224	0.014777136	7.27E-04	0.008590483
0	1808	15-19	NA	NA	NA	NA	7.696637746	7.665145206	0.0315	6.073752829	NA	NA	NA	UW	0	NA	NA	0	426	Lesotho	01/09/2004	31/01/2005	2004.67	2005.08	2004 DHS	DHS	0	0.118317651	1.001905025	0.136467894	0.005068393	4.83E-05	0.004637448
0	1809	15-19	Estimated from data reported for all women and married/in-union women.	Traditional methods include folk methods.	NA	NA	0			NA	NA	NA	NA	UW	0	NA	Including folk methods.	0	860	Uzbekistan	01/09/2002	31/12/2002	2002.67	2003	2002 DHS Special	National survey	0	NA	NA	NA	NA	NA	NA
0	1812	15-19	NA	NA	NA	NA	0.00379			0.0543	NA	NA	NA	UW	0	NA	NA	0	116	Cambodia	01/09/2005	31/03/2006	2005.67	2006.24	2005 DHS	DHS	0	1.002357483	NaN	0.556301502	3.80E-05	0	3.02E-04
0	1820	15-19	NA	NA	NA	NA	6.57016363	4.748059211	1.822104419	1.311107413	NA	NA	NA	UW	0	NA	NA	0	498	Republic of Moldova	01/06/2005	31/08/2005	2005.41	2005.66	2005 DHS	DHS	0	0.145244806	0.223187628	0.245924796	0.004544511	0.002615101	0.002057497
0	1822	15-19	NA	NA	NA	NA	6.228837528	0.716271297	5.51256623	NA	NA	NA	NA	UW	0	NA	NA	0	404	Kenya	01/12/1988	31/05/1989	1988.92	1989.41	1989 DHS	DHS	0	NA	NA	NA	NA	NA	NA
0	1823	15-19	NA	NA	NA	NA	4.93821351	1.744395322	3.193818188	4.40155066	NA	NA	NA	UW	0	NA	NA	0	404	Kenya	01/02/1993	31/08/1993	1993.08	1993.66	1993 DHS	DHS	0	0.21788623	0.176033255	0.139844589	0.002556508	0.003610056	0.002208945
0	1824	15-19	NA	NA	NA	NA	5.655378163	3.169921079	2.485457083	8.549328669	NA	NA	NA	UW	0	NA	NA	0	404	Kenya	01/02/1998	31/07/1998	1998.08	1998.58	1998 DHS	DHS	0	0.163757025	0.190942373	0.11697882	0.001889659	0.001494022	0.002604831
0	1825	15-19	NA	NA	NA	NA	0.0675			NA	NA	NA	NA	UW	0	NA	NA	0	116	Cambodia	01/02/2000	31/07/2000	2000.08	2000.58	2000 DHS	DHS	0	0.717560287	NaN	0.588024701	4.84E-04	0	5.16E-04
0	1826	15-19	NA	NA	NA	NA	3.739980989	3.333160683	0.406820307	0.840269625	NA	NA	NA	UW	0	NA	NA	0	398	Kazakhstan	01/05/1995	30/09/1995	1995.33	1995.75	1995 DHS	DHS	0	0.36446819	0.831488357	0.524867151	0.008137426	8.12E-04	0.001434719
0	1828	15-19	NA	NA	NA	NA	7.421962526	3.922495334	3.499467192	4.865217486	NA	NA	NA	UW	0	NA	NA	0	566	Nigeria	01/03/1999	31/05/1999	1999.16	1999.41	1999 DHS	DHS	0	0.176709141	0.154387495	0.148263158	0.006399125	0.003267855	0.004207627
0	1833	15-19	NA	NA	NA	NA	4.338545488	4.014828899	0.323716589	8.02393242	NA	NA	NA	UW	0	NA	NA	0	454	Malawi	01/07/2000	30/11/2000	2000.5	2000.91	2000 DHS	DHS	0	0.144258246	0.394011457	0.097471025	0.002786325	5.65E-04	0.004737807
0	1834	15-19	NA	NA	NA	NA	1.331336901	0.870773654	0.460563247	5.197924117	NA	NA	NA	UW	0	NA	NA	0	454	Malawi	01/09/1992	30/11/1992	1992.67	1992.91	1992 DHS	DHS	0	0.482994176	0.661596829	0.21526773	0.003080689	0.002103667	0.009541171
0	1835	15-19	NA	NA	NA	NA	0.147573097			0.197904966	NA	NA	NA	UW	0	NA	NA	0	232	Eritrea	01/09/1995	31/01/1996	1995.67	1996.08	1995 DHS	DHS	0	NA	NA	NA	NA	NA	NA
0	1836	15-19	NA	NA	NA	NA	0			0.076	NA	NA	NA	UW	0	NA	NA	0	608	Philippines	01/03/1993	31/05/1993	1993.16	1993.41	1993 DHS	DHS	0	NaN	NaN	0.738709338	0	0	4.98E-04
0	1837	15-19	NA	NA	NA	NA	0			0.382062835	NA	NA	NA	UW	0	NA	NA	0	608	Philippines	01/02/1998	30/04/1998	1998.08	1998.33	1998 DHS	DHS	0	NaN	NaN	0.376092314	0	0	0.001226923
0	1838	15-19	NA	NA	NA	NA	5.493663576	4.954129781	0.539533795	7.695451218	NA	NA	NA	UW	0	NA	NA	0	834	United Republic of Tanzania	01/10/2004	28/02/2005	2004.75	2005.16	2004-2005 DHS	DHS	0	0.149874198	0.434341661	0.127853593	0.00705114	0.002328728	0.009041893
0	1843	15-19	NA	NA	NA	NA	0			0	NA	NA	NA	UW	0	NA	NA	0	51	Armenia	01/09/2005	31/12/2005	2005.67	2006	2005 DHS	DHS	0	NaN	NaN	NaN	0	0	0
0	1844	15-19	NA	NA	NA	NA	3.724557319	1.895987289	1.82857003	4.547798727	NA	NA	NA	UW	0	NA	NA	0	68	Bolivia (Plurinational State of)	01/08/2003	31/01/2004	2003.58	2004.08	2003 DHS	DHS	0	0.138579773	0.178125535	0.094235242	0.002583164	0.003201677	0.004091483
0	1845	15-19	NA	NA	NA	NA	3.314166542	3.094460374	0.219706168	NA	NA	NA	NA	UW	0	NA	NA	1	454	Malawi	15/07/2006	15/11/2006	2006.53	2006.87	2006 MICS	MICS	0	NA	NA	NA	NA	NA	NA
0	1848	15-19	NA	NA	NA	NA	0			NA	NA	NA	NA	UW	0	NA	NA	0	51	Armenia	01/10/2000	31/12/2000	2000.75	2001	2000 DHS	DHS	0	NaN	NaN	NaN	0	0	0
0	1849	15-19	NA	NA	NA	NA	0.674238333			0.466990773	NA	NA	NA	UW	0	NA	NA	0	232	Eritrea	01/03/2002	31/07/2002	2002.16	2002.58	2002 DHS	DHS	0	NA	NA	NA	NA	NA	NA
0	1850	15-19	NA	NA	NA	NA	0.087			0.296912314	NA	NA	NA	UW	0	NA	NA	0	608	Philippines	01/06/2003	30/09/2003	2003.41	2003.75	2003 DHS	DHS	0	0.610757092	NaN	0.363010763	2.18E-04	0	7.56E-04
0	1851	15-19	NA	NA	NA	NA	0.0959	0.0553	0.0406	NA	NA	NA	NA	UW	0	NA	NA	0	524	Nepal	01/02/2006	31/08/2006	2006.08	2006.66	2006 DHS	DHS	0	1.002480921	1.001602222	NaN	5.55E-04	4.06E-04	0
0	1854	15-19	NA	NA	NA	NA	0.693518806	0.412467268	0.281051538	1.680235869	NA	NA	NA	UW	0	NA	NA	0	646	Rwanda	01/06/1992	31/10/1992	1992.42	1992.83	1992 DHS	DHS	0	0.386480767	0.529446237	0.235524041	0.001587241	0.001483481	0.003839226
0	1855	15-19	NA	NA	NA	NA	0.515904411	0.356458375	0.159446036	1.096035609	NA	NA	NA	UW	0	NA	NA	0	646	Rwanda	01/06/2000	31/08/2000	2000.42	2000.66	2000 DHS	DHS	0	0.331848205	0.509148141	0.207347216	8.58E-04	8.10E-04	0.002071494
0	1858	15-19	NA	NA	NA	NA	0.779880463	0.744049785	0.0358	0.509407159	NA	NA	NA	UW	0	NA	NA	0	231	Ethiopia	01/04/2005	31/08/2005	2005.25	2005.66	2005 DHS	DHS	0	0.316528144	0.661892633	0.365934159	9.76E-04	1.57E-04	8.08E-04
0	1859	15-19	NA	NA	NA	NA	14.33099666	11.830324	2.500672656	5.012748206	NA	NA	NA	UW	0	NA	NA	0	170	Colombia	01/10/2004	30/06/2005	2004.75	2005.49	2005 DHS	DHS	0	0.055894793	0.109831197	0.085505015	0.001289778	7.07E-04	7.01E-04
0	1860	15-19	NA	NA	NA	NA	1.776880882	1.09801961	0.678861272	1.380219175	NA	NA	NA	UW	0	NA	NA	0	170	Colombia	01/05/1990	31/08/1990	1990.33	1990.66	1990 DHS	DHS	0	0.262200357	0.32788636	0.263504964	0.001455831	6.58E-04	0.001304208
0	1861	15-19	NA	NA	NA	NA	10.6099318	6.60151671	4.008415087	2.917528509	NA	NA	NA	UW	0	NA	NA	0	170	Colombia	01/02/2000	30/06/2000	2000.08	2000.49	2000 DHS	DHS	0	0.101269841	0.128021508	0.13823586	0.002098047	0.001955209	0.001740598
0	1862	15-19	NA	NA	NA	NA	4.772349243	3.05863707	1.713712173	3.010922823	NA	NA	NA	UW	0	NA	NA	0	170	Colombia	01/03/1995	30/06/1995	1995.16	1995.49	1995 DHS	DHS	0	0.136847199	0.183468759	0.138281302	0.002013168	0.001649492	0.001462711
0	1867	15-19	Estimated from data reported for all women and married/in-union women.	Traditional methods include folk methods.	NA	NA	2.004692388	1.663086548	0.341605839	NA	NA	NA	NA	UW	0	NA	Including folk methods.	0	686	Senegal	01/10/1999	31/12/1999	1999.75	2000	1999 DHS	DHS	0	NA	NA	NA	NA	NA	NA
0	1868	15-19	NA	NA	NA	NA	8.458636556	7.794603307	0.664033249	4.685552186	NA	NA	NA	UW	0	NA	NA	0	76	Brazil	01/03/1996	30/06/1996	1996.16	1996.49	1996 DHS	DHS	0	0.092804926	0.276737969	0.112180195	0.004391486	0.001154244	0.003739475
0	1869	15-19	NA	NA	NA	NA	1.617860121	1.031785705	0.586074416	NA	NA	NA	NA	UW	0	NA	NA	0	76	Brazil	01/05/1986	31/08/1986	1986.33	1986.66	1986 FP-MCH DHS	DHS	0	NA	NA	NA	NA	NA	NA
0	1882	15-19	NA	NA	NA	NA	1.812975666			NA	NA	NA	NA	UW	0	NA	NA	1	398	Kazakhstan	01/01/2006	31/03/2006	2006	2006.24	2006 MICS	MICS	0	NA	NA	NA	NA	NA	NA
0	1884	15-19	NA	NA	NA	NA	7.631435028	5.061465436	2.569969592	5.802235938	NA	NA	NA	UW	0	NA	NA	0	566	Nigeria	01/03/2003	31/08/2003	2003.16	2003.66	2003 DHS	DHS	0	0.179743428	0.250524594	0.18282844	0.002889132	0.001279662	0.003907966
0	1885	15-19	NA	NA	NA	NA	3.303619405	3.222271515	0.0813	5.933372177	NA	NA	NA	UW	0	NA	NA	0	454	Malawi	01/10/2004	31/01/2005	2004.75	2005.08	2004 DHS	DHS	0	0.157904027	1.000522098	0.114282581	0.004916072	8.12E-04	0.006360471
0	1886	15-19	NA	NA	NA	NA	9.767562365	8.971731664	0.795830701	5.749896769	NA	NA	NA	UW	0	NA	NA	0	800	Uganda	01/09/2000	31/03/2001	2000.67	2001.24	2000-2001 DHS	DHS	0	0.136382587	0.380876856	0.14219248	0.01113588	0.003006602	0.007606432
0	1887	15-19	NA	NA	NA	NA	5.281787448	4.415310793	0.866476655	5.816274223	NA	NA	NA	UW	0	NA	NA	0	800	Uganda	01/05/2006	31/10/2006	2006.33	2006.83	2006 DHS	DHS	0	0.139928363	0.272215665	0.125129038	0.005203094	0.002236984	0.006181949
0	1888	15-19	NA	NA	NA	NA	13.99428069	5.304340028	8.689940667	8.943037049	NA	NA	NA	UW	0	NA	NA	0	180	Dem. Rep. of the Congo	01/01/2007	31/08/2007	2007	2007.66	2007 DHS	DHS	0	0.224005125	0.202345368	0.160035436	0.010837722	0.015589421	0.012362463
0	1893	15-19	NA	NA	NA	NA	4.824412067	4.599751183	0.224660883	NA	NA	NA	NA	UW	0	NA	NA	1	328	Guyana	31/03/2006	15/01/2007	2006.24	2007.04	2006 MICS	MICS	0	NA	NA	NA	NA	NA	NA
0	1895	15-19	NA	NA	NA	NA	6.427747094	4.075413725	2.352333369	NA	NA	NA	NA	UW	0	NA	NA	1	624	Guinea-Bissau	10/04/2000	25/05/2000	2000.27	2000.4	2000 MICS	MICS	0	NA	NA	NA	NA	NA	NA
0	1904	15-19	NA	NA	NA	NA	10.54965765	10.53125822	0.0184	NA	NA	NA	NA	UW	0	NA	NA	1	804	Ukraine	02/11/2005	27/12/2005	2005.84	2005.99	2005 MICS	MICS	0	NA	NA	NA	NA	NA	NA
0	1905	15-19	NA	NA	NA	NA	0.430663221	0.344530577	0.0861	NA	NA	NA	NA	UW	0	NA	NA	1	108	Burundi	17/04/2000	21/05/2000	2000.29	2000.39	2000 MICS	MICS	0	NA	NA	NA	NA	NA	NA
0	1906	15-19	NA	NA	NA	NA	0.78979111	0.529407805	0.260383305	NA	NA	NA	NA	UW	0	NA	NA	1	8	Albania	01/10/2005	30/11/2005	2005.75	2005.91	2005 MICS	MICS	0	NA	NA	NA	NA	NA	NA
0	1915	15-19	NA	NA	NA	NA	8.977084451	5.902178248	3.074906203	NA	NA	NA	NA	UW	0	NA	NA	1	780	Trinidad and Tobago	20/04/2006	10/06/2006	2006.3	2006.44	2006 MICS	MICS	0	NA	NA	NA	NA	NA	NA
0	1916	15-19	NA	NA	NA	NA	2.986217458	2.833078101	0.153139357	NA	NA	NA	NA	UW	0	NA	NA	1	496	Mongolia	20/05/2000	12/08/2000	2000.38	2000.61	2000 MICS	MICS	0	NA	NA	NA	NA	NA	NA
0	1919	15-19	NA	NA	NA	NA	10.95852087	10.8310869	0.127433968	NA	NA	NA	NA	UW	0	NA	NA	1	740	Suriname	01/04/2006	31/05/2006	2006.25	2006.41	2006 MICS	MICS	0	NA	NA	NA	NA	NA	NA
0	1920	15-19	NA	NA	NA	NA	4.573438874			NA	NA	NA	NA	UW	0	NA	NA	1	426	Lesotho	01/03/2000	31/05/2000	2000.16	2000.41	2000 MICS	MICS	0	NA	NA	NA	NA	NA	NA
0	1923	15-19	NA	NA	NA	NA	0.820293946			NA	NA	NA	NA	UW	0	NA	NA	1	562	Niger	16/04/2000	07/08/2000	2000.29	2000.6	2000 MICS	MICS	0	NA	NA	NA	NA	NA	NA
0	1935	15-19	NA	NA	NA	NA	14.79859811	3.764170386	11.03442773	NA	NA	NA	NA	UW	0	NA	NA	1	180	Dem. Rep. of the Congo	15/04/2001	15/10/2001	2001.28	2001.79	2001 MICS	MICS	0	NA	NA	NA	NA	NA	NA
0	1936	15-19	NA	NA	NA	NA	3.507260201			NA	NA	NA	NA	UW	0	NA	NA	1	694	Sierra Leone	01/04/2000	07/05/2000	2000.25	2000.35	2000 MICS	MICS	0	NA	NA	NA	NA	NA	NA
0	1937	15-19	NA	NA	NA	NA	5.497213568	3.534434348	1.962779219	NA	NA	NA	NA	UW	0	NA	NA	1	24	Angola	01/04/2001	31/10/2001	2001.25	2001.83	2001 MICS	MICS	0	NA	NA	NA	NA	NA	NA
0	1938	15-19	NA	NA	NA	NA	4.427083333	2.473958333	1.953125	NA	NA	NA	NA	UW	0	NA	NA	1	780	Trinidad and Tobago	14/02/2000	17/03/2000	2000.12	2000.21	2000 MICS	MICS	0	NA	NA	NA	NA	NA	NA
0	1941	15-19	NA	NA	NA	NA	4.66171967	3.652256799	1.009462871	NA	NA	NA	NA	UW	0	NA	NA	1	174	Comoros	05/10/2000	20/11/2000	2000.76	2000.89	2000 MICS	MICS	0	NA	NA	NA	NA	NA	NA
0	1945	15-19	NA	NA	NA	NA	5.500776667	5.070232768	0.430543899	NA	NA	NA	NA	UW	0	NA	NA	1	740	Suriname	01/11/1999	30/04/2000	1999.83	2000.33	2000 MICS	MICS	0	NA	NA	NA	NA	NA	NA
0	1946	15-19	NA	NA	NA	NA	23.30827068	3.383458647	19.92481203	NA	NA	NA	NA	UW	0	NA	NA	0	768	Togo	01/06/1988	30/11/1988	1988.42	1988.91	1988 DHS	DHS	0	NA	NA	NA	NA	NA	NA
0	1947	15-19	NA	NA	NA	NA	1.612754798	0.748813222	0.863941576	5.05931331	NA	NA	NA	UW	0	NA	NA	0	894	Zambia	01/01/1992	31/05/1992	1992	1992.41	1992 DHS	DHS	0	0.312796559	0.277333091	0.142155903	0.002094555	0.002142827	0.005688479
0	2296	15-19	NA	NA	NA	NA	2.878729245	2.44453044	0.434198805	NA	NA	NA	NA	UW	0	NA	NA	1	70	Bosnia and Herzegovina	15/05/2006	10/07/2006	2006.37	2006.52	2006 MICS	MICS	0	NA	NA	NA	NA	NA	NA
0	2312	15-19	NA	NA	NA	NA	23.80775478	20.50230348	3.305451293	NA	NA	NA	NA	UW	0	NA	NA	1	120	Cameroon	02/05/2006	20/06/2006	2006.33	2006.47	2006 MICS	MICS	0	NA	NA	NA	NA	NA	NA
0	2398	15-19	NA	NA	NA	NA	20.43068602	17.69806483	2.732621192	NA	NA	NA	NA	UW	0	NA	NA	1	384	CÃ´te d'Ivoire	14/08/2006	31/10/2006	2006.62	2006.83	2006 MICS	MICS	0	NA	NA	NA	NA	NA	NA
0	2456	15-19	NA	NA	NA	NA	4.865558881	2.066727234	2.798831647	NA	NA	NA	NA	UW	0	NA	NA	1	499	Montenegro	01/10/2005	31/01/2006	2005.75	2006.08	2005-2006 MICS	MICS	0	NA	NA	NA	NA	NA	NA
0	2476	15-19	NA	NA	NA	NA	1.983714661			NA	NA	NA	NA	UW	0	NA	NA	1	548	Vanuatu	01/11/2007	20/12/2007	2007.83	2007.97	2007 MICS	MICS	0	NA	NA	NA	NA	NA	NA
0	2478	15-19	NA	NA	NA	NA	9.039557228	7.905717785	1.133839442	NA	NA	NA	NA	UW	0	NA	NA	1	566	Nigeria	01/03/2007	15/04/2007	2007.16	2007.28	2007 MICS	MICS	0	NA	NA	NA	NA	NA	NA
0	2515	15-19	NA	NA	NA	NA	5.70221281	3.430257618	2.271955192	2.249463056	NA	NA	NA	UW	0	NA	NA	0	604	Peru	01/12/2003	31/12/2006	2003.92	2007	2004-2006 DHS	DHS	0	0.152336695	0.178096802	0.123488569	0.003308528	0.002727545	0.001422078
0	2516	15-19	NA	NA	NA	NA	6.229121584	4.325880519	1.903241065	2.482211815	NA	NA	NA	UW	0	NA	NA	0	604	Peru	01/03/2010	31/12/2010	2010.16	2011	2010 DHS	DHS	0	0.123804404	0.152930136	0.122647277	0.00228881	0.001864196	0.001403704
0	2517	15-19	NA	NA	NA	NA	5.646327966	4.226955645	1.41937232	2.261599073	NA	NA	NA	UW	0	NA	NA	0	604	Peru	01/01/2007	31/10/2008	2007	2008.83	2007-2008 DHS	DHS	0	0.140158926	0.207400879	0.149390043	0.004439213	0.001690665	0.001336364
0	2524	15-19	NA	NA	NA	NA	6.81360785	0.75749594	6.05611191	NA	NA	NA	NA	UW	0	NA	NA	0	646	Rwanda	01/12/2007	30/04/2008	2007.92	2008.33	2007-2008 DHS Interim	National survey	0	0.311434334	0.211689999	NaN	0.002309236	0.011973057	0
0	2556	15-19	NA	NA	NA	NA	10.78848159	10.68800189	0.100479706	6.275969807	NA	NA	NA	UW	0	NA	NA	0	678	Sao Tome and Principe	01/09/2008	31/01/2009	2008.67	2009.08	2008-2009 DHS	DHS	0	0.184684786	1.012529866	0.276751541	0.017627993	0.001016241	0.016443868
0	2557	15-19	NA	NA	NA	NA	15.05310359	14.51761314	0.535490452	NA	NA	NA	NA	UW	0	NA	NA	1	688	Serbia	01/10/2005	31/01/2006	2005.75	2006.08	2005-2006 MICS	MICS	0	NA	NA	NA	NA	NA	NA
0	2728	18-19	Estimated from data for single women and women with non-cohabiting partner.	NA	NA	NA	48.648	46.648	2	NA	NA	NA	NA	UW	+	NA	NA	0	528	Netherlands	NA	NA	1982.25	1982.75	1982 BCS	CPS	0	NA	NA	NA	NA	NA	NA
0	2743	15-19	Estimated from data reported for all women and married/in-union women.	NA	NA	NA	6.131229479	0.703155782	5.428073697	NA	NA	NA	NA	UW	0	NA	NA	0	404	Kenya	NA	NA	1984.25	1984.75	1984 CPS	CPS	0	NA	NA	NA	NA	NA	NA
0	2756	18-19	NA	NA	NA	NA	6.272665989	4.20484553	2.067820278	NA	NA	NA	NA	UW	+	NA	NA	0	724	Spain	NA	NA	1985.25	1985.75	1985 FS	National survey	0	NA	NA	NA	NA	NA	NA
0	2785	18-19	Estimated from data for single women and women with non-cohabiting partner.	NA	NA	NA	55.3037037	50.94814815	4.355555556	NA	NA	NA	NA	UW	+	NA	NA	0	528	Netherlands	NA	NA	1988.25	1988.75	1988 FFS	National survey	0	NA	NA	NA	NA	NA	NA
0	2797	15-19	Estimated from data reported for all women and married/in-union women.	Traditional methods include folk methods.	NA	NA	2.426333333	0.889	1.537333333	NA	NA	NA	NA	UW	0	NA	Including folk methods.	0	270	Gambia	NA	NA	1990.25	1990.75	1990 GCPFDS	CPS	0	NA	NA	NA	NA	NA	NA
0	2851	15-19	NA	NA	NA	NA	30.3	16.3	14	NA	NA	NA	NA	UW	0	NA	NA	0	100	Bulgaria	NA	NA	1995.25	1995.75	1995 WTS	National survey	0	NA	NA	NA	NA	NA	NA
0	2890	15-19	NA	NA	NA	NA	16.82817732	14.487647	2.340530327	NA	NA	NA	NA	UW	0	NA	NA	0	724	Spain	NA	NA	1999.25	1999.75	1999 FS	National survey	0	NA	NA	NA	NA	NA	NA
0	2922	15-19	Estimated from data reported for all women and married/in-union women.	NA	NA	NA	6.237060703	6.2	0.0371	NA	NA	NA	NA	UW	0	NA	NA	0	388	Jamaica	NA	NA	2002.25	2002.75	2002-2003 RHS	RHS	0	NA	NA	NA	NA	NA	NA
0	2942	15-19	Estimated from data reported for all women and married/in-union women.	NA	NA	NA	19.70832719	19.19675755	0.511569639	NA	NA	NA	NA	UW	0	NA	NA	0	132	Cabo Verde	01/07/2005	31/12/2005	2005.5	2006	2005 DHS-RHS	DHS	0	NA	NA	NA	NA	NA	NA
0	2948	15-19	Estimated from data reported for all women and married/in-union women.	NA	NA	NA	4.375862069	3.899278268	0.476583801	NA	NA	NA	NA	UW	0	NA	NA	0	558	Nicaragua	01/09/2006	30/04/2007	2006.67	2007.33	2006-2007 RHS-NDHS	RHS	0	NA	NA	NA	NA	NA	NA
0	2952	15-19	Estimated from data reported for all women and married/in-union women.	Traditional methods include other methods.	NA	NA	28.78354559	27.93820683	0.845338767	NA	NA	NA	NA	UW	0	NA	NA	0	76	Brazil	01/11/2006	30/05/2007	2006.83	2007.41	2006-2007 PNDS	National survey	0	NA	NA	NA	NA	NA	NA
0	2953	15-19	Estimated from data reported for all women and married/in-union women.	Traditional methods include folk methods.	NA	NA	5.439933444	4.14109817	1.298835275	NA	NA	NA	NA	UW	0	NA	Including folk methods.	0	90	Solomon Islands	09/10/2006	30/04/2007	2006.77	2007.33	2006-2007 DHS	DHS	0	NA	NA	NA	NA	NA	NA
0	3119	15-19	Estimated from data reported for all women and married/in-union women.	NA	NA	NA	1.281714647	1.170041126	0.111673521	NA	NA	NA	NA	UW	0	NA	NA	0	320	Guatemala	01/10/2008	30/06/2009	2008.75	2009.49	2008-2009 ENSMI	RHS	0	NA	NA	NA	NA	NA	NA
0	3168	15-19	Estimated from data reported for all women and married/in-union women.	NA	NA	NA	11.45069299	11.16627467	0.284418312	NA	NA	NA	NA	UW	0	NA	NA	0	388	Jamaica	01/06/2008	30/04/2009	2008.42	2009.33	2008 RHS	RHS	0	NA	NA	NA	NA	NA	NA
0	3231	18-19	NA	NA	NA	NA	46	NA	NA	NA	NA	NA	NA	UW	+	NA	NA	0	528	Netherlands	01/07/1998	01/05/1998	1998.5	1998.33	1998 FFS	National survey	0	NA	NA	NA	NA	NA	NA
0	3233	18-19	NA	NA	NA	NA	36	NA	NA	NA	NA	NA	NA	UW	+	NA	NA	0	528	Netherlands	01/02/2003	01/05/2003	2003.08	2003.33	2003 FFS	National survey	0	NA	NA	NA	NA	NA	NA
0	3259	15-19	Estimated from data reported for all women and married/in-union women.	Traditional methods include folk methods.	NA	NA	5.927385892	5.391649341	0.535736551	0.7	NA	NA	NA	UW	0	NA	Including folk methods.	0	584	Marshall Islands	08/02/2007	07/06/2007	2007.1	2007.43	2007 DHS	National survey	0	NA	NA	NA	NA	NA	NA
0	3267	15-19	NA	NA	NA	NA	1.857585139	0.92879257	0.92879257	NA	NA	NA	NA	UW	0	NA	NA	0	598	Papua New Guinea	01/10/2006	31/01/2007	2006.75	2007.08	2006 DHS	National survey	0	NA	NA	NA	NA	NA	NA
0	3269	15-19	Estimated from data reported for all women and married/in-union women.	NA	NA	NA	0.0909	0.0695	0.0214	NA	NA	NA	NA	UW	0	NA	NA	0	608	Philippines	NA	NA	1995.25	1995.75	Annual FPS	National survey	0	NA	NA	NA	NA	NA	NA
0	3270	15-19	Estimated from data reported for all women and married/in-union women.	NA	NA	NA	0.0314	0.0249	0.00648	NA	NA	NA	NA	UW	0	NA	NA	0	608	Philippines	NA	NA	1996.25	1996.75	Annual FPS	National survey	0	NA	NA	NA	NA	NA	NA
0	3271	15-19	Estimated from data reported for all women and married/in-union women.	NA	NA	NA	0.608766015	0.539244774	0.0695	NA	NA	NA	NA	UW	0	NA	NA	0	608	Philippines	NA	NA	1997.25	1997.75	Annual FPS	National survey	0	NA	NA	NA	NA	NA	NA
0	3273	15-19	Estimated from data reported for all women and married/in-union women.	NA	NA	NA	0.571492986			NA	NA	NA	NA	UW	0	NA	NA	0	608	Philippines	NA	NA	1999.25	1999.75	Annual FPS	National survey	0	NA	NA	NA	NA	NA	NA
0	3275	15-19	Estimated from data reported for all women and married/in-union women.	NA	NA	NA	0.0456	0.0321	0.0135	NA	NA	NA	NA	UW	0	NA	NA	0	608	Philippines	NA	NA	2001.25	2001.75	Annual FPS	National survey	0	NA	NA	NA	NA	NA	NA
0	3276	15-19	Estimated from data reported for all women and married/in-union women.	NA	NA	NA	0.0539	0.0197	0.0342	NA	NA	NA	NA	UW	0	NA	NA	0	608	Philippines	NA	NA	2002.25	2002.75	Annual FPS	National survey	0	NA	NA	NA	NA	NA	NA
0	3278	15-19	Estimated from data reported for all women and married/in-union women.	NA	NA	NA	0.0727			NA	NA	NA	NA	UW	0	NA	NA	0	608	Philippines	NA	NA	2004.25	2004.75	Annual FPS	National survey	0	NA	NA	NA	NA	NA	NA
0	3279	15-19	Estimated from data reported for all women and married/in-union women.	NA	NA	NA	0.041	0.0267	0.0143	NA	NA	NA	NA	UW	0	NA	NA	0	608	Philippines	NA	NA	2005.25	2005.75	Annual FPS	National survey	0	NA	NA	NA	NA	NA	NA
0	3358	15-19	NA	Traditional methods include folk methods.	NA	NA	0.468522073	0.253550864	0.214971209	NA	NA	NA	NA	UW	0	NA	Including folk methods.	0	882	Samoa	01/08/2009	30/09/2009	2009.58	2009.75	2009 DHS	DHS	0	NA	NA	NA	NA	NA	NA
0	4483	15-19	NA	NA	NA	NA	2.878296684	0.896948667	1.981348017	0.313952474	NA	NA	NA	UW	0	NA	NA	0	8	Albania	01/10/2008	30/04/2009	2008.75	2009.33	2008-2009 DHS	DHS	0	0.324424603	0.240074036	0.574157585	0.002501553	0.003755648	0.001017484
0	4492	15-19	NA	NA	NA	NA	4.369603464	2.950049276	1.419554188	4.002189034	NA	NA	NA	UW	0	NA	NA	0	68	Bolivia (Plurinational State of)	01/02/2008	30/06/2008	2008.08	2008.49	2008 DHS	DHS	0	0.125067644	0.173677067	0.109193881	0.003582605	0.002431836	0.004179166
0	4493	15-19	NA	NA	NA	NA	15.38127825	10.33430173	5.046976516	8.718986017	NA	NA	NA	UW	0	NA	NA	0	204	Benin	01/12/2011	31/03/2012	2011.92	2012.25	2011-2012 DHS	DHS	0	0.101035153	0.148912505	0.079139341	0.003479808	0.002901072	0.003531748
0	4494	15-19	NA	NA	NA	NA	6.171689243	5.818125276	0.353563967	4.453220545	NA	NA	NA	UW	0	NA	NA	0	854	Burkina Faso	01/05/2010	31/01/2011	2010.33	2011.08	2010 DHS-MICS	DHS	0	NA	NA	NA	NA	NA	NA
0	4550	15-19	NA	NA	NA	NA	11.41867346	7.939308266	3.479365192	17.9476862	NA	NA	NA	UW	0	NA	NA	0	694	Sierra Leone	01/04/2008	30/06/2008	2008.25	2008.49	2008 DHS	DHS	0	0.152713451	0.247228502	0.120417071	0.008054192	0.004683874	0.008240305
0	4566	15-19	NA	NA	NA	NA	2.766393443	2.356557377	0.409836066	NA	NA	NA	NA	UW	0	NA	NA	0	496	Mongolia	NA	NA	2008.25	2008.75	2008 RHS	National survey	0	NA	NA	NA	NA	NA	NA
0	4686	15-19	NA	NA	NA	NA	14.71012486	12.01834214	2.691782726	5.747308786	NA	NA	NA	UW	0	NA	NA	0	120	Cameroon	01/01/2011	31/08/2011	2011	2011.66	2011 DHS-MICS	DHS	0	0.071025862	0.135162267	0.09515227	0.00387569	0.001258734	0.001906749
0	4687	15-19	NA	NA	NA	NA	16.66895614	13.19791737	3.471038771	17.20749091	NA	NA	NA	UW	0	NA	NA	0	384	CÃ´te d'Ivoire	01/12/2011	31/05/2012	2011.92	2012.41	2011-2012 DHS-MICS	DHS	0	0.102577192	0.189366952	0.095640977	0.004995207	0.002298082	0.005274734
0	4688	15-19	NA	NA	NA	NA	7.582340439	4.999183852	2.583156587	6.529166838	NA	NA	NA	UW	0	NA	NA	0	288	Ghana	01/09/2008	30/11/2008	2008.67	2008.91	2008 DHS	DHS	0	0.167087544	0.224586897	0.173583916	0.00649779	0.004471192	0.008866927
0	4689	15-19	NA	NA	NA	NA	3.627067064	2.925400058	0.701667006	6.110171608	NA	NA	NA	UW	0	NA	NA	0	404	Kenya	01/11/2008	28/02/2009	2008.83	2009.16	2008-2009 DHS	DHS	0	0.178380323	0.442336529	0.175385778	0.001823018	6.74E-04	0.008099882
0	4691	15-19	NA	NA	NA	NA	5.991960224	2.975531696	3.016428528	7.545909484	NA	NA	NA	UW	0	NA	NA	0	450	Madagascar	01/11/2008	31/08/2009	2008.83	2009.66	2008-2009 DHS	DHS	0	0.128967728	0.12802933	0.096896564	0.002581684	0.003052502	0.004100937
0	4692	15-19	NA	NA	NA	NA	3.987874862	3.730564637	0.257310225	5.224476808	NA	NA	NA	UW	0	NA	NA	0	454	Malawi	01/06/2010	30/11/2010	2010.41	2010.91	2010 DHS	DHS	0	0.12507959	0.354039207	0.089914002	0.002680367	8.92E-04	0.00310649
0	4695	15-19	NA	NA	NA	NA	8.44300065	5.615994105	2.827006545	5.14219804	NA	NA	NA	UW	0	NA	NA	0	566	Nigeria	01/06/2008	31/10/2008	2008.42	2008.83	2008 DHS	DHS	0	0.074685732	0.11894895	0.074359708	0.001657274	0.001532977	0.001271747
0	4697	15-19	NA	NA	NA	NA	9.710663351	8.877987627	0.832675723	7.302880569	NA	NA	NA	UW	0	NA	NA	0	834	United Republic of Tanzania	01/12/2009	31/05/2010	2009.92	2010.41	2010 DHS	DHS	0	0.115354313	0.360826973	0.112505299	0.007956251	0.002862864	0.006156268
0	4700	15-19	NA	NA	NA	NA	0.520335572	0.142153499	0.378182073	0.761387545	NA	NA	NA	UW	0	NA	NA	0	608	Philippines	01/08/2008	30/09/2008	2008.58	2008.75	2008 DHS	DHS	0	0.579597875	0.385116703	0.240972526	8.22E-04	0.001450395	0.001818423
0	4701	15-19	NA	NA	NA	NA	11.18985754	10.84855729	0.341300249	4.56031316	NA	NA	NA	UW	0	NA	NA	0	328	Guyana	01/03/2009	31/07/2009	2009.16	2009.58	2009 DHS	DHS	0	0.136330668	0.611341531	0.189537058	0.009210947	4.48E-04	0.005767705
0	4702	15-19	NA	NA	NA	NA	6.48911741	4.707559218	1.781558192	2.106113444	NA	NA	NA	UW	0	NA	NA	0	604	Peru	01/03/2009	30/11/2009	2009.16	2009.91	2009 DHS	DHS	0	0.113213043	0.132607944	0.124112984	0.004216369	0.001550444	0.001856562
0	4871	15-19	NA	NA	NA	NA	15.07284417	14.41542007	0.657424099	NA	NA	NA	NA	UW	0	NA	NA	1	508	Mozambique	01/08/2008	30/11/2008	2008.58	2008.91	2008 MICS	MICS	0	NA	NA	NA	NA	NA	NA
0	4873	15-19	Estimated from data reported for all women and married/in-union women.	NA	NA	NA	17.2	13.50196078	3.698039216	NA	NA	NA	NA	UW	0	NA	NA	0	24	Angola	24/05/2008	30/06/2009	2008.39	2009.49	2008-2009 IBEP-MICS	National survey	0	NA	NA	NA	NA	NA	NA
0	4945	15-19	NA	NA	NA	NA	21.11152941	19.3528011	1.758728305	5.39585683	NA	NA	NA	UW	0	NA	NA	0	170	Colombia	01/11/2009	30/11/2010	2009.83	2010.91	2010 DHS	DHS	0	0.038286995	0.107524967	0.064026564	0.001522391	4.08E-04	6.09E-04
0	4947	15-19	NA	NA	NA	NA	7.557218493	7.236456419	0.320762073	5.045467704	NA	NA	NA	UW	0	NA	NA	0	426	Lesotho	01/10/2009	31/01/2010	2009.75	2010.08	2009 DHS	DHS	0	0.123324546	0.5698097	0.131855865	0.002945512	6.72E-04	0.002119924
0	4948	15-19	NA	NA	NA	NA	0.0312			0.140324232	NA	NA	NA	UW	0	NA	NA	0	626	Timor-Leste	01/08/2009	28/02/2010	2009.58	2010.16	2009-2010 DHS	DHS	0	NA	NA	NA	NA	NA	NA
0	4950	15-19	NA	NA	NA	NA	0.638676942			1.735766577	NA	NA	NA	UW	0	NA	NA	0	108	Burundi	01/08/2010	31/01/2011	2010.58	2011.08	2010 DHS	DHS	0	0.261973906	NaN	0.174463518	0.001216162	0	0.002305041
0	4951	15-19	NA	NA	NA	NA	0			0.0679	NA	NA	NA	UW	0	NA	NA	0	116	Cambodia	01/07/2010	31/01/2011	2010.5	2011.08	2010 DHS	DHS	0	NaN	NaN	0.800028376	0	0	5.42E-04
0	4952	15-19	Estimated from data reported for all women and married/in-union women.	NA	NA	NA	4.083941606	2.541605839	1.542335766	NA	NA	NA	NA	UW	0	NA	NA	0	454	Malawi	01/06/1996	31/10/1996	1996.42	1996.83	1996 KAPS	National survey	0	NA	NA	NA	NA	NA	NA
0	4974	18-19	Contraceptive use questions were asked only among women with a partner.	Modern methods include some cases of sterilisation for non-contraceptive reasons.	NA	NA	2			NA	NA	NA	NA	PW	+	NA	NA	0	643	Russian Federation	NA	NA	2004.25	2004.75	2004 GGP	GGS	0	NA	NA	NA	NA	NA	NA
0	4986	15-19	NA	NA	NA	NA	13.36875874	8.770293098	4.598465646	NA	NA	NA	NA	UW	0	NA	NA	1	52	Barbados	01/05/2012	31/10/2012	2012.33	2012.83	2012 MICS	MICS	0	NA	NA	NA	NA	NA	NA
0	4987	15-19	NA	NA	NA	NA	18.37078349	17.29083639	1.079947101	NA	NA	NA	NA	UW	0	NA	NA	1	112	Belarus	28/03/2012	02/07/2012	2012.24	2012.5	2012 MICS	MICS	0	NA	NA	NA	NA	NA	NA
0	4988	15-19	NA	NA	NA	NA	7.76033914	6.909738512	0.850600628	NA	NA	NA	NA	UW	0	NA	NA	1	84	Belize	13/06/2011	05/08/2011	2011.45	2011.59	2011 MICS	MICS	0	NA	NA	NA	NA	NA	NA
0	4989	15-19	NA	NA	NA	NA	0.232071289			NA	NA	NA	NA	UW	0	NA	NA	1	64	Bhutan	01/04/2010	24/08/2010	2010.25	2010.64	2010 MICS	MICS	0	NA	NA	NA	NA	NA	NA
0	4990	15-19	NA	NA	NA	NA	1.643855104	1.333051973	0.310803131	NA	NA	NA	NA	UW	0	NA	NA	1	70	Bosnia and Herzegovina	01/11/2011	31/03/2012	2011.83	2012.25	2011-2012 MICS	MICS	0	NA	NA	NA	NA	NA	NA
0	4991	15-19	NA	NA	NA	NA	5.938530245	3.319468739	2.619061506	NA	NA	NA	NA	UW	0	NA	NA	1	140	Central African Republic	22/06/2010	07/01/2011	2010.47	2011.02	2010 MICS	MICS	0	NA	NA	NA	NA	NA	NA
0	4992	15-19	NA	NA	NA	NA	1.74406279	1.3162406	0.427822191	NA	NA	NA	NA	UW	0	NA	NA	1	148	Chad	12/02/2010	31/05/2010	2010.12	2010.41	2010 MICS	MICS	0	NA	NA	NA	NA	NA	NA
0	4993	15-19	NA	NA	NA	NA	16.50016719	16.41702288	0.0831	NA	NA	NA	NA	UW	0	NA	NA	1	188	Costa Rica	26/09/2011	27/11/2011	2011.73	2011.9	2011 MICS	MICS	0	NA	NA	NA	NA	NA	NA
0	4994	15-19	NA	NA	NA	NA	50.38785368	50.32515681	0.0627	NA	NA	NA	NA	UW	0	NA	NA	1	192	Cuba	01/11/2010	30/04/2011	2010.83	2011.33	2010-2011 MICS	MICS	0	NA	NA	NA	NA	NA	NA
0	4996	15-19	NA	NA	NA	NA	9.735493899	3.395980106	6.339513793	NA	NA	NA	NA	UW	0	NA	NA	1	180	Dem. Rep. of the Congo	08/02/2010	26/04/2010	2010.1	2010.32	2010 MICS	MICS	0	NA	NA	NA	NA	NA	NA
0	4998	15-19	NA	NA	NA	NA	1.278563063	0.957766269	0.305671119	NA	NA	NA	NA	UW	0	NA	NA	1	270	Gambia	01/04/2010	31/08/2010	2010.25	2010.66	2010 MICS	MICS	0	NA	NA	NA	NA	NA	NA
0	5000	15-19	NA	NA	NA	NA	11.74404736	8.97005509	2.773992267	NA	NA	NA	NA	UW	0	NA	NA	1	288	Ghana	01/09/2011	31/12/2011	2011.67	2012	2011 MICS	MICS	0	NA	NA	NA	NA	NA	NA
0	5006	15-19	NA	NA	NA	NA	2.466643046			NA	NA	NA	NA	UW	0	NA	NA	1	398	Kazakhstan	01/11/2010	31/01/2011	2010.83	2011.08	2010-2011 MICS	MICS	0	NA	NA	NA	NA	NA	NA
0	5011	15-19	NA	NA	NA	NA	4.23497535	3.673414811	0.561560539	NA	NA	NA	NA	UW	0	NA	NA	1	466	Mali	NA	NA	2009.25	2009.75	2009-2010 MICS	MICS	0	NA	NA	NA	NA	NA	NA
0	5013	15-19	NA	NA	NA	NA	10.50471812	10.16288676	0.341831355	NA	NA	NA	NA	UW	0	NA	NA	1	498	Republic of Moldova	17/04/2012	30/06/2012	2012.29	2012.49	2012 MICS	MICS	0	NA	NA	NA	NA	NA	NA
0	5014	15-19	NA	NA	NA	NA	2.722200242	2.574621519	0.147578723	NA	NA	NA	NA	UW	0	NA	NA	1	496	Mongolia	04/08/2010	18/08/2010	2010.59	2010.63	2010 MICS	MICS	0	NA	NA	NA	NA	NA	NA
0	5015	15-19	NA	NA	NA	NA	6.013835752	5.92519293	0.0886	2.357356473	NA	NA	NA	UW	0	NA	NA	1	499	Montenegro	01/03/2013	31/05/2013	2013.16	2013.41	2013 MICS	MICS	0	NA	NA	NA	NA	NA	NA
0	5018	15-19	NA	NA	NA	NA	10.87372229	7.293902361	3.579819928	NA	NA	NA	NA	UW	0	NA	NA	1	566	Nigeria	01/02/2011	31/03/2011	2011.08	2011.24	2011 MICS	MICS	0	NA	NA	NA	NA	NA	NA
0	5023	15-19	NA	NA	NA	NA	9.748776395	8.988581877	0.760194517	6.705668335	NA	NA	NA	UW	0	NA	NA	1	591	Panama	NA	NA	2013.25	2013.75	2013 MICS	MICS	0	NA	NA	NA	NA	NA	NA
0	5024	15-19	NA	NA	NA	NA	19.80151052	18.60858246	1.192928059	NA	NA	NA	NA	UW	0	NA	NA	1	688	Serbia	01/11/2010	31/12/2010	2010.83	2011	2010 MICS	MICS	0	NA	NA	NA	NA	NA	NA
0	5025	15-19	NA	NA	NA	NA	17.00563196	16.3471863	0.658445665	NA	NA	NA	NA	UW	0	NA	NA	1	694	Sierra Leone	01/10/2010	31/12/2010	2010.75	2011	2010 MICS	MICS	0	NA	NA	NA	NA	NA	NA
0	5027	15-19	NA	NA	NA	NA	16.4931091	15.02465783	1.468451274	NA	NA	NA	NA	UW	0	NA	NA	1	662	Saint Lucia	NA	NA	2011.25	2011.75	2012 MICS	MICS	0	0.241763449	0.719885833	0.284161106	0.026344285	0.010303462	0.019906515
0	5030	15-19	NA	NA	NA	NA	12.12193298	11.94858321	0.173349772	NA	NA	NA	NA	UW	0	NA	NA	1	740	Suriname	11/07/2010	22/07/2010	2010.52	2010.55	2010 MICS	MICS	0	0.128703615	1.003190553	0.11841925	0.013088843	0.001736111	0.011859404
0	5031	15-19	NA	NA	NA	NA	14.7825888	13.78457797	0.998010828	NA	NA	NA	NA	UW	0	NA	NA	1	748	Eswatini	12/08/2010	27/11/2010	2010.61	2010.9	2010 MICS	MICS	0	NA	NA	NA	NA	NA	NA
0	5034	15-19	NA	NA	NA	NA	0.634826369	0.575865182	0.059	NA	NA	NA	NA	UW	0	NA	NA	1	764	Thailand	01/09/2012	30/11/2012	2012.67	2012.91	2012 MICS	MICS	0	NA	NA	NA	NA	NA	NA
0	5035	15-19	NA	NA	NA	NA	10.29317235	9.294716131	0.998456216	NA	NA	NA	NA	UW	0	NA	NA	1	807	TFYR Macedonia	01/04/2011	31/01/2011	2011.25	2011.08	2011 MICS	MICS	0	NA	NA	NA	NA	NA	NA
0	5036	15-19	NA	NA	NA	NA	13.52929664	12.92455873	0.604737909	NA	NA	NA	NA	UW	0	NA	NA	1	768	Togo	06/09/2010	04/11/2010	2010.68	2010.84	2010 MICS	MICS	0	NA	NA	NA	NA	NA	NA
0	5040	15-19	NA	NA	NA	NA	12.42577572	11.55023175	0.875543974	NA	NA	NA	NA	UW	0	NA	NA	1	804	Ukraine	28/09/2012	31/12/2012	2012.74	2013	2012 MICS	MICS	0	NA	NA	NA	NA	NA	NA
0	5043	15-19	NA	NA	NA	NA	0.336356556	0.218409403	0.117947152	NA	NA	NA	NA	UW	0	NA	NA	1	704	Viet Nam	29/11/2010	26/01/2011	2010.91	2011.07	2011 MICS	MICS	0	NA	NA	NA	NA	NA	NA
0	5044	15-19	NA	NA	NA	NA	3.265066209	3.047576256	0.217489953	NA	NA	NA	NA	UW	0	NA	NA	1	716	Zimbabwe	20/04/2009	30/05/2009	2009.3	2009.41	2009 MICS	MICS	0	NA	NA	NA	NA	NA	NA
0	5046	15-19	NA	NA	NA	NA	0.232406723			0	NA	NA	NA	UW	0	NA	NA	0	51	Armenia	01/10/2010	31/12/2010	2010.75	2011	2010 DHS	DHS	0	0.837343331	NaN	NaN	0.001896772	0	0
0	5050	15-19	NA	NA	NA	NA	34.88830436	21.44733429	13.44097007	9.417709678	NA	NA	NA	UW	0	NA	NA	0	178	Congo	01/09/2011	29/02/2012	2011.67	2012.16	2011-2012 DHS	DHS	0	NA	NA	NA	NA	NA	NA
0	5052	15-19	Estimated from data reported for all women and married/in-union women.	NA	NA	NA	14.49359431	12.07793594	2.415658363	NA	NA	NA	NA	UW	0	NA	NA	0	226	Equatorial Guinea	01/07/2011	30/11/2011	2011.5	2011.91	2011 DHS	DHS	0	NA	NA	NA	NA	NA	NA
0	5053	15-19	NA	NA	NA	NA	0.995458572			0.682101981	NA	NA	NA	UW	0	NA	NA	0	231	Ethiopia	01/12/2010	31/05/2011	2010.92	2011.41	2011 DHS	DHS	0	0.27072528	NaN	0.261865859	6.87E-04	0	6.54E-04
0	5054	15-19	NA	NA	NA	NA	30.95095288	25.53373387	5.417219011	13.39738114	NA	NA	NA	UW	0	NA	NA	0	266	Gabon	01/01/2012	31/05/2012	2012	2012.41	2012 DHS	DHS	0	NA	NA	NA	NA	NA	NA
0	5056	15-19	NA	NA	NA	NA	4.801989476	3.791528106	1.01046137	3.172785486	NA	NA	NA	UW	0	NA	NA	0	340	Honduras	01/09/2011	31/07/2012	2011.67	2012.58	2011-2012 DHS	DHS	0	0.096044199	0.186977709	0.105087357	0.002379047	0.001311473	0.002333915
0	5062	15-19	NA	NA	NA	NA	0.113909316			1.618069454	NA	NA	NA	UW	0	NA	NA	1	418	Lao People's Dem. Republic	01/09/2011	29/02/2012	2011.67	2012.16	2011-2012 DHS-MICS Special	DHS	0	NA	NA	NA	NA	NA	NA
0	5064	15-19	NA	NA	NA	NA	9.898729071	9.764620829	0.134108241	14.93204691	NA	NA	NA	UW	0	NA	NA	0	508	Mozambique	01/06/2011	30/11/2011	2011.41	2011.91	2011 DHS	DHS	0	0.095431539	0.586398162	0.090235622	0.00444838	1.98E-04	0.005099382
0	5065	15-19	NA	NA	NA	NA	0.116916831	0.0585	0.0585	0.189864658	NA	NA	NA	UW	0	NA	NA	0	524	Nepal	01/01/2011	30/06/2011	2011	2011.49	2011 DHS	DHS	0	1.003517403	1.000496216	0.480496466	5.86E-04	5.84E-04	9.08E-04
0	5066	15-19	NA	NA	NA	NA	1.132018707	1.058002067	0.074	2.084635386	NA	NA	NA	UW	0	NA	NA	0	646	Rwanda	01/09/2010	31/03/2011	2010.67	2011.24	2010 DHS	DHS	0	0.202326307	0.713761585	0.127908432	0.001084486	1.34E-04	0.001443519
0	5071	15-19	NA	NA	NA	NA	12.0453164	10.4941676	1.551148804	8.661694814	NA	NA	NA	UW	0	NA	NA	0	768	Togo	01/11/2013	30/04/2014	2013.83	2014.33	2013-2014 DHS-MICS	DHS	0	0.114279383	0.235310614	0.100145371	0.004837596	0.001229581	0.003905385
0	5072	15-19	NA	NA	NA	NA	5.055301927	4.289272574	0.766029353	5.32323486	NA	NA	NA	UW	0	NA	NA	0	800	Uganda	01/06/2011	31/12/2011	2011.41	2012	2011 DHS	DHS	0	NA	NA	NA	NA	NA	NA
0	5073	15-19	NA	NA	NA	NA	2.395322646			3.017739368	NA	NA	NA	UW	0	NA	NA	0	716	Zimbabwe	01/09/2010	31/03/2011	2010.67	2011.24	2010-2011 DHS	DHS	0	0.165926693	NaN	0.149999119	0.001258118	0	0.001778199
0	5146	18-19	NA	NA	NA	NA	59	NA	NA	NA	NA	NA	NA	UW	+	NA	NA	0	528	Netherlands	01/03/2008	01/08/2008	2008.16	2008.58	2008 FFS	National survey	0	NA	NA	NA	NA	NA	NA
0	5274	15-19	NA	NA	NA	NA	0.991391846	0.934325422	0.0571	1.914747915	NA	NA	NA	UW	0	NA	NA	0	686	Senegal	01/10/2010	30/04/2011	2010.75	2011.33	2010-2011 DHS-MICS	DHS	0	0.240045252	0.590425839	0.169058943	0.001731605	8.44E-05	0.001127272
0	5373	15-19	NA	NA	NA	NA	7.17499956	5.018923161	2.156076399	2.451558738	NA	NA	NA	UW	0	NA	NA	0	604	Peru	01/03/2011	31/12/2011	2011.16	2012	2011 DHS	DHS	0	0.112869808	0.155796968	0.131615013	0.003232153	0.001904085	0.001427874
0	5413	15-19	NA	NA	NA	NA	0.201001773	0.181206688	0.0198	1.088300648	NA	NA	NA	UW	0	NA	NA	0	562	Niger	01/02/2012	30/06/2012	2012.08	2012.49	2012 DHS-MICS	DHS	0	1.00459841	1.001913444	0.420709276	0.001815805	3.03E-05	6.00E-04
0	5422	15-19	NA	NA	NA	NA	6.942971551	5.277978807	1.664992744	10.34666049	NA	NA	NA	UW	0	NA	NA	0	324	Guinea	01/06/2012	31/10/2012	2012.42	2012.83	2012 DHS	DHS	0	0.136791448	0.252133065	0.111095165	0.00318848	0.001891137	0.005314011
0	5427	18-19	NA	Modern methods include some cases of sterilisation for non-contraceptive reasons.	NA	NA	42.3			NA	NA	NA	NA	UW	+	NA	NA	0	56	Belgium	01/02/2008	31/05/2010	2008.08	2010.41	2008-2010 GGS	GGS	0	NA	NA	NA	NA	NA	NA
0	5430	18-19	Contraceptive use questions were asked only among women with a partner.	Modern methods include some cases of sterilisation for non-contraceptive reasons.	NA	NA	37.6			NA	NA	NA	NA	PW	+	NA	NA	0	250	France	26/09/2005	03/12/2005	2005.73	2005.92	2005 GGS	GGS	0	NA	NA	NA	NA	NA	NA
0	5434	18-19	Contraceptive use questions were asked only among women with a partner.	Modern methods include some cases of sterilisation for non-contraceptive reasons.	NA	NA	24.5			NA	NA	NA	NA	PW	+	NA	NA	0	276	Germany	22/02/2005	12/05/2005	2005.14	2005.36	2005 GGS	GGS	0	NA	NA	NA	NA	NA	NA
0	5438	18-19	Contraceptive use questions were asked only among women with a partner.	Modern methods include some cases of sterilisation for non-contraceptive reasons.	NA	NA	9.7			NA	NA	NA	NA	PW	+	NA	NA	0	440	Lithuania	01/04/2006	30/12/2006	2006.25	2006.99	2006 GGS	GGS	0	NA	NA	NA	NA	NA	NA
0	5444	15-19	Estimated from data reported for all women and married/in-union women.	NA	NA	NA	0.74911032	0.71316726	0.0359	NA	NA	NA	NA	UW	0	NA	NA	0	296	Kiribati	18/09/2009	18/12/2009	2009.71	2009.96	2009 DHS	DHS	0	NA	NA	NA	NA	NA	NA
0	5447	15-19	NA	NA	NA	NA	7.755159594	6.319081905	1.43607769	3.393711145	NA	NA	NA	UW	0	NA	NA	0	566	Nigeria	01/02/2013	30/06/2013	2013.08	2013.49	2013 DHS	DHS	0	0.069119857	0.126419339	0.091258393	0.002357625	8.00E-04	0.001780514
0	5450	15-19	Estimated from data reported for all women and married/in-union women.	Traditional methods include folk methods.	NA	NA	6.551111111	5.054222222	1.496888889	NA	NA	NA	NA	UW	0	NA	Including folk methods.	1	548	Vanuatu	NA	NA	2013.25	2013.75	2013 DHS-MICS	National survey	0	NA	NA	NA	NA	NA	NA
0	5451	15-19	NA	NA	NA	NA	6.337657317	6.087982302	0.249675015	8.294748157	NA	NA	NA	UW	0	NA	NA	0	332	Haiti	01/01/2012	30/06/2012	2012	2012.49	2012 DHS-MICS	DHS	0	0.110479792	0.408189789	0.078234064	0.003717831	5.54E-04	0.003643935
0	5455	18-19	Contraceptive use questions were asked only among women with a partner.	Modern methods include some cases of sterilisation for non-contraceptive reasons.	NA	NA	25	24.6	0.4	NA	NA	NA	NA	PW	+	NA	NA	0	203	Czechia	NA	NA	2005.25	2005.75	2005 GGS	GGS	0	NA	NA	NA	NA	NA	NA
0	5457	15-19	NA	NA	NA	NA	0.127768037			0.0926	NA	NA	NA	UW	0	NA	NA	0	417	Kyrgyzstan	01/08/2012	31/12/2012	2012.58	2013	2012 DHS	DHS	0	0.997382404	NaN	1.001501999	0.00127343	0	9.27E-04
0	5458	15-19	NA	NA	NA	NA	0.158235776	0.129206366	0.029	0.147847764	NA	NA	NA	UW	0	NA	NA	0	360	Indonesia	01/05/2012	31/07/2012	2012.33	2012.58	2012 DHS Special	National survey	0	NA	NA	NA	NA	NA	NA
0	5459	15-19	NA	NA	NA	NA	2.136101597	1.472486266	0.663615331	0.873917266	NA	NA	NA	UW	0	NA	NA	0	174	Comoros	01/08/2012	31/12/2012	2012.58	2013	2012 DHS-MICS	DHS	0	0.3868653	0.493197482	0.32027121	0.002967952	0.001516322	0.002427037
0	5460	15-19	NA	NA	NA	NA	5.114516171	4.790940178	0.323575993	7.864322437	NA	NA	NA	UW	0	NA	NA	0	466	Mali	13/11/2012	05/02/2013	2012.87	2013.1	2012-2013 DHS	DHS	0	NA	NA	NA	NA	NA	NA
0	5462	15-19	NA	NA	NA	NA	0.374104309			1.237601669	NA	NA	NA	UW	0	NA	NA	0	270	Gambia	01/02/2013	30/04/2013	2013.08	2013.33	2013 DHS	DHS	0	NA	NA	NA	NA	NA	NA
0	5469	15-19	NA	NA	NA	NA	17.84557162	16.88084459	0.964727036	25.0086731	NA	NA	NA	UW	0	NA	NA	0	430	Liberia	01/03/2013	31/07/2013	2013.16	2013.58	2013 DHS	DHS	0	0.104819377	0.472039079	0.092102912	0.006061769	7.84E-04	0.004260882
0	5490	15-19	NA	NA	NA	NA	1.001020522	0.959117272	0.0419	1.182715427	NA	NA	NA	UW	0	NA	NA	0	686	Senegal	01/09/2012	30/06/2013	2012.67	2013.49	2012-2013 DHS	DHS	0	0.21233872	0.999465189	0.237691296	0.002013454	1.56E-04	0.002091617
0	5503	15-19	NA	NA	NA	NA	1.677742633			2.212350773	NA	NA	NA	UW	0	NA	NA	0	231	Ethiopia	01/01/2014	31/03/2014	2014	2014.24	2014 PMA-R1	PMA	0	0.284548018	NaN	0.428153742	0.002358887	0	0.001568151
0	5549	15-19	NA	NA	NA	NA	5.698271836	4.29705745	1.401214386	NA	NA	NA	NA	UW	0	NA	NA	0	566	Nigeria	01/07/2012	31/12/2012	2012.5	2013	2012 NARHS	National survey	0	NA	NA	NA	NA	NA	NA
0	5555	15-19	NA	NA	NA	NA	7.412674114	5.05448383	2.358190284	2.191413935	NA	NA	NA	UW	0	NA	NA	0	604	Peru	01/03/2012	31/12/2012	2012.16	2013	2012 DHS	DHS	0	0.103290893	0.123476021	0.129660852	0.002081506	0.001163395	0.001336578
0	5556	15-19	NA	NA	NA	NA	24.8964859	23.74463965	1.151846249	13.15003007	NA	NA	NA	UW	0	NA	NA	0	694	Sierra Leone	01/06/2013	31/10/2013	2013.41	2013.83	2013 DHS	DHS	0	0.06968904	0.211516539	0.073747074	0.005678725	7.39E-04	0.003283647
0	5557	15-19	Estimated from data reported for all women and married/in-union women.	NA	NA	NA	0			NA	NA	NA	NA	UW	0	NA	NA	0	792	Turkey	NA	NA	2013.25	2013.75	2013 NDHS	National survey	0	NA	NA	NA	NA	NA	NA
0	5561	15-19	NA	NA	NA	NA	4.924605651	4.517470787	0.407134864	5.576275289	NA	NA	NA	UW	0	NA	NA	1	222	El Salvador	01/03/2014	28/09/2014	2014.16	2014.74	2014 MICS	MICS	0	NA	NA	NA	NA	NA	NA
0	5564	15-19	NA	NA	NA	NA	1.762858943	1.717447558	0.0454	4.800003234	NA	NA	NA	UW	0	NA	NA	0	148	Chad	01/10/2014	30/04/2015	2014.75	2015.33	2014-2015 DHS-MICS	DHS	0	0.213776433	1.00297462	0.129905565	0.002863115	1.57E-04	0.002271141
0	5565	15-19	NA	NA	NA	NA	0.176593213	0.135546147	0.041	0.0202	NA	NA	NA	UW	0	NA	NA	0	356	India	01/01/2015	31/12/2016	2015	2017	2015-2016 NFHS	DHS	0	NA	NA	NA	NA	NA	NA
0	5566	15-19	NA	NA	NA	NA	0.0893	0.039	0.0503	0.190143151	NA	NA	NA	UW	0	NA	NA	0	116	Cambodia	01/06/2014	31/12/2014	2014.41	2015	2014 DHS	DHS	0	0.712052478	1.000244948	0.478740985	1.89E-04	5.03E-04	6.22E-04
0	5569	15-19	Estimated from data reported for all women and married/in-union women.	NA	NA	NA	1.403849975	1.195678092	0.208171883	NA	NA	NA	NA	UW	0	NA	NA	0	558	Nicaragua	01/06/2011	28/11/2012	2011.41	2012.91	2011-2012 NDHS	National survey	0	NA	NA	NA	NA	NA	NA
0	5577	15-19	NA	NA	NA	NA	0.739004742			0	NA	NA	NA	UW	0	NA	NA	1	417	Kyrgyzstan	24/04/2014	30/06/2014	2014.31	2014.49	2014 MICS	MICS	0	NA	NA	NA	NA	NA	NA
0	5578	15-19	NA	NA	NA	NA	13.95894462	12.64988071	1.309063908	0	NA	NA	NA	UW	0	NA	NA	1	688	Serbia	01/02/2014	30/04/2014	2014.08	2014.33	2014 MICS	MICS	0	NA	NA	NA	NA	NA	NA
0	5579	15-19	NA	NA	NA	NA	2.408784694	2.133539744	0.27524495	2.782559587	NA	NA	NA	UW	0	NA	NA	1	496	Mongolia	30/09/2013	28/12/2013	2013.75	2013.99	2013 MICS	MICS	0	NA	NA	NA	NA	NA	NA
0	5580	15-19	NA	NA	NA	NA	0			0.181628459	NA	NA	NA	UW	0	NA	NA	1	704	Viet Nam	01/12/2013	31/03/2014	2013.92	2014.24	2013-2014 MICS	MICS	0	NA	NA	NA	NA	NA	NA
0	5582	15-19	NA	NA	NA	NA	6.092295065	6.030470203	0.0618	9.971003053	NA	NA	NA	UW	0	NA	NA	1	454	Malawi	01/11/2013	28/04/2014	2013.83	2014.32	2013-2014 MICS	MICS	0	NA	NA	NA	NA	NA	NA
0	5584	15-19	NA	NA	NA	NA	16.57123355			4.76502045	NA	NA	NA	UW	0	NA	NA	1	748	Eswatini	01/07/2014	31/10/2014	2014.5	2014.83	2014 MICS	MICS	0	NA	NA	NA	NA	NA	NA
0	5585	15-19	NA	NA	NA	NA	5.656815563	5.454915596	0.201899967	4.144627508	NA	NA	NA	UW	0	NA	NA	1	716	Zimbabwe	15/02/2014	15/04/2014	2014.12	2014.28	2014 MICS	MICS	0	NA	NA	NA	NA	NA	NA
0	5589	15-19	NA	NA	NA	NA	44	43.4	0.6	NA	NA	NA	NA	UW	0	NA	NA	0	250	France	01/06/2010	31/01/2011	2010.41	2011.08	2010 EnquÃªte Fecond	National survey	0	NA	NA	NA	NA	NA	NA
0	5602	15-19	NA	NA	NA	NA	3.70887767	2.836846804	0.608840758	12.08767078	NA	NA	NA	UW	0	NA	NA	0	288	Ghana	01/07/2013	30/11/2013	2013.5	2013.91	2013 PMA-R1	PMA	0	0.274516737	0.990536535	0.218295141	0.00534904	0.006253034	0.012702083
0	5603	18-19	NA	NA	NA	NA	47.08			NA	NA	NA	NA	UW	+	NA	NA	0	36	Australia	24/08/2005	10/03/2006	2005.64	2006.19	2005-2006 HILDA	National survey	0	NA	NA	NA	NA	NA	NA
0	5612	15-19	NA	NA	NA	NA	11.23962254	4.897957753	6.341664786	10.1905279	NA	NA	NA	UW	0	NA	NA	0	180	Dem. Rep. of the Congo	01/08/2013	28/02/2014	2013.58	2014.16	2013-2014 DHS	DHS	0	0.123156155	0.143533246	0.099673055	0.003634885	0.004684309	0.00427903
0	5613	15-19	NA	NA	NA	NA	0.980928336	0.399223538	0.581704798	1.182502856	NA	NA	NA	UW	0	NA	NA	0	608	Philippines	01/08/2013	30/09/2013	2013.58	2013.75	2013 DHS	DHS	0	0.300386545	0.278600034	0.176583234	9.30E-04	9.25E-04	0.001494897
0	5616	15-19	NA	NA	NA	NA	23.73792245	23.6718722	0.0661	7.70030569	NA	NA	NA	UW	0	NA	NA	0	516	Namibia	01/05/2013	30/09/2013	2013.33	2013.75	2013 DHS	DHS	0	0.069483512	0.725471191	0.109022142	0.006266455	1.15E-04	0.003087616
0	5635	15-19	NA	NA	NA	NA	10.54115211	8.824779746	1.716372368	NA	NA	NA	NA	UW	0	NA	NA	1	384	CÃ´te d'Ivoire	01/07/2016	31/08/2016	2016.5	2016.66	2016 MICS	MICS	0	NA	NA	NA	NA	NA	NA
0	5637	15-19	NA	NA	NA	NA	33.28407113	30.88516861	2.398902519	15.82290113	NA	NA	NA	UW	0	NA	NA	1	624	Guinea-Bissau	01/03/2014	31/07/2014	2014.16	2014.58	2014 MICS	MICS	0	NA	NA	NA	NA	NA	NA
0	5641	15-19	NA	NA	NA	NA	32.38559582	18.19534588	14.19024994	5.204886161	NA	NA	NA	UW	0	NA	NA	1	120	Cameroon	NA	NA	2014.25	2014.75	2014 MICS	MICS	0	NA	NA	NA	NA	NA	NA
0	5642	15-19	NA	NA	NA	NA	20.75810146	16.0335769	4.724524561	12.57769762	NA	NA	NA	UW	0	NA	NA	1	178	Congo	01/11/2014	28/02/2015	2014.83	2015.16	2014-2015 MICS	MICS	0	NA	NA	NA	NA	NA	NA
0	5644	15-19	NA	NA	NA	NA	13.79951043	12.374424	1.425086431	10.72818566	NA	NA	NA	UW	0	NA	NA	1	678	Sao Tome and Principe	NA	NA	2014.25	2014.75	2014 MICS	MICS	0	NA	NA	NA	NA	NA	NA
0	5659	15-19	NA	NA	NA	NA	5.116150716	5.054155836	0.062	10.73116201	NA	NA	NA	UW	0	NA	NA	0	894	Zambia	01/08/2013	30/04/2014	2013.58	2014.33	2013-2014 DHS	DHS	0	0.115370868	0.871554036	0.069170361	0.001627833	7.28E-05	0.003407902
0	5665	15-19	NA	NA	NA	NA	8.24021293	5.808130549	2.432082381	15.47931301	NA	NA	NA	UW	0	NA	NA	1	204	Benin	01/05/2014	01/05/2014	2014.33	2014.33	2014 MICS	MICS	0	NA	NA	NA	NA	NA	NA
0	5666	15-19	NA	NA	NA	NA	1.331178947			0.0924	NA	NA	NA	UW	0	NA	NA	1	398	Kazakhstan	15/09/2015	15/11/2015	2015.7	2015.87	2015 MICS	MICS	0	NA	NA	NA	NA	NA	NA
0	5669	15-19	NA	NA	NA	NA	1.465636803	1.348399672	0.117237132	NA	NA	NA	NA	UW	0	NA	NA	1	764	Thailand	15/11/2015	15/03/2016	2015.87	2016.2	2015-2016 MICS	MICS	0	NA	NA	NA	NA	NA	NA
0	5672	15-19	NA	NA	NA	NA	0.0209			0	NA	NA	NA	UW	0	NA	NA	1	524	Nepal	01/02/2014	30/06/2014	2014.08	2014.49	2014 MICS	MICS	0	NA	NA	NA	NA	NA	NA
0	5673	15-19	NA	NA	NA	NA	52.66591547	52.17791339	0.488002087	3.950967675	NA	NA	NA	UW	0	NA	NA	1	192	Cuba	01/02/2014	28/09/2014	2014.08	2014.74	2014 MICS	MICS	0	NA	NA	NA	NA	NA	NA
0	5674	15-19	NA	NA	NA	NA	13.23943965	12.88811308	0.351326573	7.617012222	NA	NA	NA	UW	0	NA	NA	1	214	Dominican Republic	01/06/2014	31/08/2014	2014.41	2014.66	2014 MICS	MICS	0	NA	NA	NA	NA	NA	NA
0	5675	15-19	NA	NA	NA	NA	3.813712915	2.400128631	1.413584284	3.913668131	NA	NA	NA	UW	0	NA	NA	1	328	Guyana	NA	NA	2014.25	2014.75	2014 MICS	MICS	0	NA	NA	NA	NA	NA	NA
0	5676	15-19	NA	NA	NA	NA	6.359363742	5.221631027	1.137732715	NA	NA	NA	NA	UW	0	NA	NA	1	324	Guinea	NA	NA	2016.25	2016.75	2016 MICS	MICS	0	NA	NA	NA	NA	NA	NA
0	5677	15-19	NA	NA	NA	NA	5.623055521	5.464426263	0.158629258	7.967983183	NA	NA	NA	UW	0	NA	NA	1	466	Mali	20/07/2015	21/10/2015	2015.55	2015.8	2015 MICS	MICS	0	NA	NA	NA	NA	NA	NA
0	5710	15-19	NA	NA	NA	NA	14.61236817	13.56090465	1.051463522	5.628634488	NA	NA	NA	UW	0	NA	NA	0	214	Dominican Republic	01/07/2013	31/10/2013	2013.5	2013.83	2013 DHS	DHS	0	0.105135373	0.356492241	0.159987812	0.005192144	0.001367186	0.002541935
0	5721	15-19	NA	NA	NA	NA	3.36451554			10.59095306	NA	NA	NA	UW	0	NA	NA	0	404	Kenya	01/07/2014	23/07/2014	2014.5	2014.56	2014 PMA-R1	PMA	0	0.231630108	NaN	0.189838155	0.004626759	0	0.008866942
0	5722	15-19	NA	NA	NA	NA	7.982885997	7.518965229	0.289689365	9.45706311	NA	NA	NA	UW	0	NA	NA	0	800	Uganda	01/08/2015	30/09/2015	2015.58	2015.75	2015 PMA-R3	PMA	0	0.203579454	0.609835633	0.180416721	0.007923315	6.09E-04	0.0108711
0	5764	15-19	NA	NA	NA	NA	5.789001017	4.523483162	1.127951651	5.863978591	NA	NA	NA	UW	0	NA	NA	0	854	Burkina Faso	01/09/2014	31/10/2014	2014.67	2014.83	2015 PMA-R2	PMA	0	0.257511835	0.621244264	0.383766543	0.009621547	0.006585398	0.020059591
0	5765	15-19	NA	NA	NA	NA	1.463001709			1.778050856	NA	NA	NA	UW	0	NA	NA	0	231	Ethiopia	01/10/2014	31/12/2014	2014.75	2015	2014 PMA-R2	PMA	0	0.295686483	NaN	0.462262902	0.002329045	0	0.001313339
0	5766	15-19	NA	NA	NA	NA	4.368567147	3.519983432	0.145187229	10.63366891	NA	NA	NA	UW	0	NA	NA	0	288	Ghana	01/02/2014	31/05/2014	2014.08	2014.41	2014 PMA-R2	PMA	0	0.223537487	1.002422679	0.195663465	0.005456081	8.24E-04	0.013238834
0	5767	15-19	NA	NA	NA	NA	7.755496668	6.157179775	1.598316893	9.309963226	NA	NA	NA	UW	0	NA	NA	0	288	Ghana	01/09/2014	31/12/2014	2014.67	2015	2014 PMA-R3	PMA	0	0.255105909	0.284651153	0.191390702	0.010415864	0.00338237	0.010046138
0	5768	15-19	NA	NA	NA	NA	10.16425901	9.408819544	0.320364461	17.87215354	NA	NA	NA	UW	0	NA	NA	0	404	Kenya	01/06/2015	31/07/2015	2015.41	2015.58	2015 PMA-R3	PMA	0	0.177858618	0.59766001	0.248008188	0.006444799	0.001737677	0.018645578
0	5769	15-19	NA	NA	NA	NA	16.83617614	16.39894164	0.437234492	2.886866478	NA	NA	NA	UW	0	NA	NA	0	426	Lesotho	01/09/2014	31/12/2014	2014.67	2015	2014 DHS	DHS	0	0.097385764	0.492815444	0.224617385	0.004292426	6.25E-04	0.001668026
0	5778	15-19	NA	NA	NA	NA	7.973885938	5.60234665	2.371539289	9.014919007	NA	NA	NA	UW	0	NA	NA	0	288	Ghana	01/09/2014	31/12/2014	2014.67	2015	2014 DHS	DHS	0	0.172195811	0.20150017	0.116348569	0.003928584	0.002820632	0.003860415
0	5779	15-19	NA	NA	NA	NA	1.685686816	1.652530052	0.0332	2.048203561	NA	NA	NA	UW	0	NA	NA	0	686	Senegal	01/01/2014	31/10/2014	2014	2014.83	2014 DHS	DHS	0	0.321917319	1.002889213	0.277162565	0.005268333	9.18E-05	0.004987344
0	5780	15-19	NA	NA	NA	NA	6.024552078	5.564631768	0.459920309	2.367767888	NA	NA	NA	UW	0	NA	NA	0	404	Kenya	01/05/2014	31/10/2014	2014.33	2014.83	2014 DHS	DHS	0	NA	NA	NA	NA	NA	NA
0	5788	15-19	NA	NA	NA	NA	24.8769896	23.54226231	1.334727286	4.688956029	NA	NA	NA	UW	0	NA	NA	0	170	Colombia	01/02/2015	31/03/2016	2015.08	2016.25	2015 DHS	DHS	0	0.056087007	0.157379697	0.101092527	0.002373493	5.77E-04	9.51E-04
0	5790	15-19	NA	NA	NA	NA	2.357389412	1.882714656	0.474674756	2.210242974	NA	NA	NA	UW	0	NA	NA	0	320	Guatemala	01/10/2014	30/06/2015	2014.75	2015.49	2014-2015 ENSMI	DHS	0	0.133127426	0.211927815	0.112862266	0.001951934	6.82E-04	0.001945155
0	5794	15-19	Estimated from data reported for all women and married/in-union women.	NA	NA	NA	18.03647059	16.91223529	1.124235294	11.86305882	NA	NA	NA	UW	0	NA	NA	0	508	Mozambique	01/05/2015	31/10/2015	2015.33	2015.83	2015 AIS	National survey	0	NA	NA	NA	NA	NA	NA
0	5796	15-19	NA	NA	NA	NA	1.217450984	0.996298633	0.22115235	3.439561765	NA	NA	NA	UW	0	NA	NA	0	646	Rwanda	01/11/2014	30/04/2015	2014.83	2015.33	2014-2015 DHS	DHS	0	0.198632915	0.450863239	0.106808614	0.001667556	6.81E-04	0.003052643
0	5797	15-19	NA	NA	NA	NA	24.55206428	24.50927211	0.0428	7.505233086	NA	NA	NA	UW	0	NA	NA	0	710	South Africa	24/06/2016	04/11/2016	2016.48	2016.84	2016 DHS	DHS	0	NA	NA	NA	NA	NA	NA
0	5798	15-19	NA	NA	NA	NA	4.064274766			2.638992045	NA	NA	NA	UW	0	NA	NA	0	716	Zimbabwe	01/07/2015	31/12/2015	2015.5	2016	2015 DHS	DHS	0	0.133914131	NaN	0.162728051	0.002388012	0	0.001798469
0	5805	15-19	NA	NA	NA	NA	9.469959423	9.113725933	0.35623349	16.41566282	NA	NA	NA	UW	0	NA	NA	0	24	Angola	01/11/2015	29/02/2016	2015.83	2016.16	2015-2016 DHS	DHS	0	0.11846039	0.385556023	0.082655771	0.004184231	6.19E-04	0.006365433
0	5806	15-19	NA	NA	NA	NA	0			NA	NA	NA	NA	UW	0	NA	NA	0	51	Armenia	01/12/2015	30/04/2016	2015.92	2016.33	2015 DHS	DHS	0	NA	NA	NA	NA	NA	NA
0	5808	15-19	NA	NA	NA	NA	2.376924239	2.298583195	0.0783	1.402665806	NA	NA	NA	UW	0	NA	NA	0	231	Ethiopia	01/01/2016	30/06/2016	2016	2016.49	2016 DHS	DHS	0	0.173548282	0.752980938	0.272573485	0.001768897	9.64E-05	8.79E-04
0	5825	15-19	NA	NA	NA	NA	7.607550893	6.915817455	0.691733438	9.434888446	NA	NA	NA	UW	0	NA	NA	0	332	Haiti	01/11/2016	30/04/2017	2016.83	2017.33	2016 DHS	DHS	0	NA	NA	NA	NA	NA	NA
0	5826	15-19	Estimated from data reported for all women and married/in-union women.	Traditional methods include folk methods.	NA	NA	7.151784232	5.131037344	2.020746888	NA	NA	NA	NA	UW	0	NA	Including folk methods.	0	604	Peru	01/03/2013	30/11/2013	2013.16	2013.91	2013 DHS	DHS	0	NA	NA	NA	NA	NA	NA
0	5919	15-19	Estimated from data reported for all women and married/in-union women.	NA	NA	NA	0.316288877			0.1	NA	NA	NA	UW	0	NA	NA	0	232	Eritrea	14/01/2010	07/07/2010	2010.04	2010.51	2010 PHS	National survey	0	NA	NA	NA	NA	NA	NA
0	5952	15-19	NA	NA	NA	NA	8.459478351	8.337431025	0.122047327	7.310819269	NA	NA	NA	UW	0	NA	NA	0	454	Malawi	01/10/2015	29/02/2016	2015.75	2016.16	2015-2016 DHS	DHS	0	0.079449943	0.833107122	0.072227638	0.001556239	1.96E-04	0.001317216
0	5954	15-19	Estimated from data reported for all women and married/in-union women.	Traditional methods include folk methods.	NA	NA	8.151582527	6.138660738	2.012921789	NA	NA	NA	NA	UW	0	NA	Including folk methods.	0	604	Peru	01/03/2014	31/12/2014	2014.16	2015	2014 DHS	DHS	0	NA	NA	NA	NA	NA	NA
0	5955	15-19	NA	NA	NA	NA	1.484741682	1.399554433	0.0852	1.348049703	NA	NA	NA	UW	0	NA	NA	0	686	Senegal	01/01/2015	31/10/2015	2015	2015.83	2015 DHS	DHS	0	0.285029991	0.706271774	0.249252575	0.003903763	5.98E-04	0.003148605
0	5957	15-19	NA	NA	NA	NA	9.060498252	7.171146144	1.889352108	7.132030346	NA	NA	NA	UW	0	NA	NA	0	834	United Republic of Tanzania	01/08/2015	29/02/2016	2015.58	2016.16	2015-2016 DHS	DHS	0	NA	NA	NA	NA	NA	NA
0	5993	15-19	NA	NA	NA	NA	1.586733296			5.537577007	NA	NA	NA	UW	0	NA	NA	0	854	Burkina Faso	01/07/2014	31/12/2014	2014.5	2015	2014 PMA-R1	PMA	0	0.520326091	NaN	0.339295179	0.007980099	0	0.015279649
0	5994	15-19	NA	NA	NA	NA	0.00662			0.853969235	NA	NA	NA	UW	0	NA	NA	0	360	Indonesia	01/07/2015	31/08/2015	2015.5	2015.66	2015 PMA-R1	PMA	0	0.75636045	NaN	0.757318639	4.33E-06	0	0.00324301
0	5995	15-19	NA	NA	NA	NA	9.642949495	6.145155705	2.483816546	15.02839381	NA	NA	NA	UW	0	NA	NA	0	288	Ghana	01/05/2015	30/06/2015	2015.33	2015.49	2015 PMA-R4	PMA	0	0.165853254	0.283120904	0.16946346	0.009252181	0.006604771	0.017924697
0	5996	15-19	NA	NA	NA	NA	4.736957915	3.793310945	0.0832	7.553887014	NA	NA	NA	UW	0	NA	NA	0	404	Kenya	01/11/2014	31/12/2014	2014.83	2015	2014 PMA-R2	PMA	0	0.245604435	1.007535996	0.175520307	0.007123737	2.38E-04	0.007683098
0	5997	15-19	NA	NA	NA	NA	4.517018674	4.359376086	0.157642588	9.686658595	NA	NA	NA	UW	0	NA	NA	0	800	Uganda	01/07/2014	28/06/2014	2014.5	2014.49	2014 PMA-R1	PMA	0	0.250703634	0.989224551	0.19981385	0.005684961	4.91E-04	0.006470883
0	5998	15-19	NA	NA	NA	NA	7.884112873	7.40786525	0.476247623	5.322715651	NA	NA	NA	UW	0	NA	NA	0	800	Uganda	01/01/2015	28/02/2015	2015	2015.16	2015 PMA-R2	PMA	0	0.197153112	0.60439991	0.231438196	0.006920137	0.001085613	0.005882908
0	6001	15-19	NA	NA	NA	NA	2.597017565			1.058316633	NA	NA	NA	UW	0	NA	NA	0	231	Ethiopia	01/04/2015	31/05/2015	2015.25	2015.41	2015 PMA-R3	PMA	0	0.214232717	NaN	0.327705759	0.002654244	0	0.001079365
0	6002	18-19	NA	NA	NA	NA	50.62			NA	NA	NA	NA	UW	+	NA	NA	0	36	Australia	29/07/2011	15/02/2012	2011.57	2012.12	2011-2012 HILDA	National survey	0	NA	NA	NA	NA	NA	NA
0	6003	15-19	NA	NA	Data pertain to urban centers with 2,000 or more people.	NA	28.42490249	28.39740202	0.0275	NA	Data pertain to urban centers with 2,000 or more people.	NA	NA	UW	0	NA	NA	0	32	Argentina	01/05/2013	30/06/2013	2013.33	2013.49	2013 ENSSyR	National survey	0	NA	NA	NA	NA	NA	NA
0	6006	18-19	NA	NA	NA	NA	43.41047705	43.37313846	0.0373	NA	NA	NA	NA	UW	+	NA	NA	0	76	Brazil	NA	NA	2013.25	2013.75	2013 PNS	National survey	0	NA	NA	NA	NA	NA	NA
0	6009	18-19	NA	NA	NA	NA	64	NA	NA	NA	NA	NA	NA	UW	+	NA	NA	0	528	Netherlands	01/07/2013	01/10/2013	2013.5	2013.75	2013 FFS	GGS	0	NA	NA	NA	NA	NA	NA
0	6014	15-19	Estimated from data reported for all women and married/in-union women.	NA	NA	NA	0.102145046			0.8	NA	NA	NA	UW	0	NA	NA	0	882	Samoa	01/07/2014	01/08/2014	2014.5	2014.58	2014 DHS	National survey	0	NA	NA	NA	NA	NA	NA
0	6025	18-19	NA	Modern methods include some cases of sterilisation for non-contraceptive reasons.	NA	NA	65.84701512			NA	NA	NA	NA	UW	+	NA	NA	0	40	Austria	22/09/2012	27/05/2013	2012.72	2013.4	2012-2013 GGS	GGS	0	NA	NA	NA	NA	NA	NA
0	6026	18-19	NA	NA	NA	NA	42.81			NA	NA	NA	NA	UW	+	NA	NA	0	36	Australia	15/08/2008	28/02/2009	2008.62	2009.16	2008-2009 HILDA	National survey	0	NA	NA	NA	NA	NA	NA
0	6037	15-19	NA	NA	NA	NA	8.023561035	6.118084072	0.490492734	8.108811819	NA	NA	NA	UW	0	NA	NA	0	404	Kenya	01/11/2015	31/12/2015	2015.83	2016	2015 PMA-R4	PMA	0	0.191617787	0.47046267	0.152187802	0.009612332	0.001069865	0.008192932
0	6056	15-19	NA	NA	NA	NA	1.676731422	1.373780412	0.30295101	1.702128439	NA	NA	NA	UW	0	NA	NA	0	108	Burundi	01/10/2016	28/02/2017	2016.75	2017.16	2016 DHS	DHS	0	NA	NA	NA	NA	NA	NA
0	6084	15-19	NA	NA	NA	NA	0			0.0254	NA	NA	NA	UW	0	NA	NA	0	104	Myanmar	01/12/2015	31/07/2016	2015.92	2016.58	2015-2016 DHS	DHS	0	NaN	NaN	1.000674758	0	0	8.51E-05
0	6086	15-19	NA	NA	NA	NA	0.0537			NA	NA	NA	NA	UW	0	NA	NA	0	524	Nepal	01/06/2016	31/01/2017	2016.42	2017.08	2016 DHS	DHS	0	1.005659934	NaN	NaN	5.40E-04	0	0
0	6097	15-19	NA	NA	NA	NA	0			0.126286603	NA	NA	NA	UW	0	NA	NA	0	626	Timor-Leste	16/09/2016	22/12/2016	2016.71	2016.97	2016 DHS	DHS	0	NA	NA	NA	NA	NA	NA
0	6099	15-19	NA	NA	NA	NA	7.071120766	6.570252323	0.500868442	6.492556475	NA	NA	NA	UW	0	NA	NA	0	800	Uganda	01/06/2016	30/11/2016	2016.42	2016.91	2016 DHS	DHS	0	NA	NA	NA	NA	NA	NA
0	6107	15-19	NA	NA	NA	NA	7.369592822	6.675698029	0.693894793	8.388714491	NA	NA	NA	UW	0	NA	NA	0	854	Burkina Faso	01/03/2016	31/05/2016	2016.16	2016.41	2016 PMA-R3	PMA	0	0.245062927	0.629500389	0.218398248	0.008371345	0.004248763	0.009439838
0	6114	15-19	NA	NA	NA	NA	10.90682782	10.33526819	0.373140656	8.583952765	NA	NA	NA	UW	0	NA	NA	0	800	Uganda	01/04/2016	31/05/2016	2016.25	2016.41	2016 PMA-R4	PMA	0	0.220853939	0.63208714	0.196824147	0.020335572	0.002334206	0.015050266
0	6115	15-19	NA	NA	NA	NA	2.864047616	2.634487902	0.0163	1.304661666	NA	NA	NA	UW	0	NA	NA	0	231	Ethiopia	01/03/2016	30/04/2016	2016.16	2016.33	2016 PMA-R4	PMA	0	0.232740299	1.000921115	0.317786726	0.004942517	3.23E-05	0.001857744
0	6116	15-19	NA	NA	NA	NA	0.12588921			0.517724761	NA	NA	NA	UW	0	NA	NA	0	562	Niger	22/02/2016	29/04/2016	2016.14	2016.33	2016 PMA-R1	PMA	0	1.006165259	NaN	0.586751319	2.64E-04	0	0.001128257
0	7045	15-19	NA	NA	NA	NA	5.34956478	4.103295499	1.144934068	NA	NA	NA	NA	UW	0	NA	NA	0	566	Nigeria	01/05/2016	30/06/2016	2016.33	2016.49	2016 PMA-R1	PMA	0	0.193099167	0.320779986	0.175284172	0.004987191	0.003140139	0.009460315
0	7339	15-19	NA	NA	NA	NA	6.298420511	6.157774931	0.140645581	7.607037368	NA	NA	NA	UW	0	NA	NA	1	484	Mexico	15/09/2015	15/12/2015	2015.7	2015.95	2015 MICS	MICS	0	NA	NA	NA	NA	NA	NA
0	7344	18-19	NA	NA	NA	NA	46.38			NA	NA	NA	NA	UW	+	NA	NA	0	36	Australia	28/07/2015	07/02/2016	2015.57	2016.1	2015-2016 HILDA	National survey	0	NA	NA	NA	NA	NA	NA
0	7347	15-19	Estimated from data reported for all women and married/in-union women.	NA	NA	NA	1.393653032			NA	NA	NA	NA	UW	0	NA	NA	0	231	Ethiopia	10/01/2014	30/04/2014	2014.02	2014.33	2014 MDHS	National survey	0	NA	NA	NA	NA	NA	NA
0	7360	15-19	NA	NA	NA	NA	7.878256279	6.094385035	1.783871244	13.1197121	NA	NA	NA	UW	0	NA	NA	0	288	Ghana	01/08/2016	30/11/2016	2016.58	2016.91	2016 PMA-R5	PMA	0	0.212100023	0.355352922	0.207635642	0.007023235	0.003762515	0.016849232
0	7369	15-19	NA	NA	NA	NA	0.55489512	0.369533173	0.185361947	0.694030838	NA	NA	NA	UW	0	NA	NA	0	608	Philippines	01/08/2017	31/10/2017	2017.58	2017.83	2017 DHS	DHS	0	NA	NA	NA	NA	NA	NA
0	7370	15-19	NA	NA	NA	NA	0.701790153			0.533801392	NA	NA	NA	UW	0	NA	NA	0	686	Senegal	01/01/2016	31/10/2016	2016	2016.83	2016 DHS	DHS	0	0.246368518	NaN	0.326433918	0.001192477	0	0.001259884
0	7371	15-19	NA	NA	NA	NA	0			NA	NA	NA	NA	UW	0	NA	NA	0	762	Tajikistan	08/08/2017	11/11/2017	2017.6	2017.86	2017 DHS	DHS	0	NA	NA	NA	NA	NA	NA
0	7412	15-19	NA	NA	NA	NA	13.16712329	9.229680365	3.937442922	NA	NA	NA	NA	UW	0	NA	NA	0	450	Madagascar	NA	NA	2012.25	2012.75	2012-2013 ENSOMD	National survey	0	NA	NA	NA	NA	NA	NA
0	7419	15-19	NA	NA	NA	NA	31.51739514	30.94148454	0.575910603	NA	NA	NA	NA	UW	0	NA	NA	0	840	United States of America	NA	NA	2013.25	2013.75	2013-2015 NSFG	National survey	0	NA	NA	NA	NA	NA	NA
0	7427	18-19	NA	Modern methods exclude female and male sterilisation.	NA	NA	7.2			NA	NA	NA	NA	UW	+	NA	NA	0	616	Poland	20/10/2010	28/02/2011	2010.8	2011.16	2010-2011 GGS	GGS	0	NA	NA	NA	NA	NA	NA
0	7474	15-19	NA	NA	NA	NA	1.441409047	0.16691411	1.274494937	0.553320539	NA	NA	NA	UW	0	NA	NA	0	8	Albania	11/09/2017	20/02/2018	2017.69	2018.14	2017-2018 DHS	DHS	0	NA	NA	NA	NA	NA	NA
0	7479	15-19	NA	NA	NA	NA	0.160026844			0	NA	NA	NA	UW	0	NA	NA	0	360	Indonesia	01/10/2016	31/01/2017	2016.75	2017.08	2016-2017 PMA-R2	PMA	0	NA	NA	NA	NA	NA	NA
0	7480	15-19	NA	NA	NA	NA	2.869170797	2.820470135	0.0139	2.231696678	NA	NA	NA	UW	0	NA	NA	0	231	Ethiopia	01/04/2017	30/05/2017	2017.25	2017.41	2017 PMA-R5	PMA	0	NA	NA	NA	NA	NA	NA
0	7481	15-19	NA	NA	NA	NA	10.46620307	9.126022646	1.166081873	8.414956865	NA	NA	NA	UW	0	NA	NA	0	800	Uganda	01/04/2017	31/05/2017	2017.25	2017.41	2017 PMA-R5	PMA	0	NA	NA	NA	NA	NA	NA
0	7482	15-19	NA	NA	NA	NA	6.634210456	5.137196747	1.21706448	6.564981085	NA	NA	NA	UW	0	NA	NA	0	566	Nigeria	01/04/2017	30/05/2017	2017.25	2017.41	2017 PMA-R2	PMA	0	NA	NA	NA	NA	NA	NA
0	7483	15-19	NA	NA	NA	NA	7.268749829	6.982321881	0.286427948	12.17648203	NA	NA	NA	UW	0	NA	NA	0	854	Burkina Faso	01/11/2016	31/01/2017	2016.83	2017.08	2016-2017 PMA-R4	PMA	0	0.213886659	0.754871606	0.194521617	0.011345716	0.002013137	0.017335432
0	7484	15-19	NA	NA	NA	NA	7.704067768	6.482714933	0.704562231	8.756879082	NA	NA	NA	UW	0	NA	NA	0	404	Kenya	01/11/2016	31/12/2016	2016.83	2017	2016 PMA-R5	PMA	0	0.197421416	0.423351202	0.14109501	0.010850044	0.002001334	0.009916782
0	7485	15-19	Estimated from data reported for all women and married/in-union women.	NA	NA	NA	4.808702355	3.565272261	1.243430094	NA	NA	NA	NA	UW	0	NA	NA	0	68	Bolivia (Plurinational State of)	03/05/2016	30/09/2016	2016.34	2016.75	2016 DHS	National survey	0	NA	NA	NA	NA	NA	NA
0	7494	15-19	NA	NA	NA	NA	30.41023253	30.01549686	0.394735665	NA	NA	NA	NA	UW	0	NA	NA	0	152	Chile	01/11/2015	31/01/2016	2015.83	2016.08	2015-2016 ENCVS	National survey	0	NA	NA	NA	NA	NA	NA
0	7496	15-19	NA	NA	NA	NA	16.9364768	16.66184008	0.274636712	8.981919878	NA	NA	NA	UW	0	NA	NA	1	600	Paraguay	01/06/2016	16/09/2016	2016.42	2016.71	2016 MICS	MICS	0	NA	NA	NA	NA	NA	NA
0	7514	15-19	NA	NA	NA	NA	0.626717737			1.728276596	NA	NA	NA	UW	0	NA	NA	0	562	Niger	01/05/2017	30/09/2017	2017.33	2017.75	2017 PMA-R2	PMA	0	NA	NA	NA	NA	NA	NA
0	7516	15-19	Estimated from data reported for all women and married/in-union women.	NA	NA	NA	2.625818182	1.684727273	0.941090909	NA	NA	NA	NA	UW	0	NA	NA	0	90	Solomon Islands	06/04/2015	18/09/2015	2015.26	2015.71	2015 DHS	National survey	0	NA	NA	NA	NA	NA	NA
0	7517	15-19	Estimated from data reported for all women and married/in-union women.	Traditional methods include folk methods.	NA	NA	9.590761994	7.698400753	1.892361242	NA	NA	NA	NA	UW	0	NA	Including folk methods.	0	604	Peru	NA	NA	2015.25	2015.75	2015 DHS	DHS	0	NA	NA	NA	NA	NA	NA
0	7518	15-19	Estimated from data reported for all women and married/in-union women.	Traditional methods include folk methods.	NA	NA	8.659100238	6.783706413	1.875393826	NA	NA	NA	NA	UW	0	NA	Including folk methods.	0	604	Peru	NA	NA	2016.25	2016.75	2016 DHS	DHS	0	NA	NA	NA	NA	NA	NA
0	7630	15-19	NA	NA	NA	NA	1.083384185	1.020098384	0.0633	1.451010842	NA	NA	NA	UW	0	NA	NA	0	686	Senegal	01/04/2017	31/12/2017	2017.25	2018	2017 DHS	DHS	0	NA	NA	NA	NA	NA	NA
0	7641	15-19	Estimated from data reported for all women and married/in-union women.	Traditional methods include folk methods.	NA	NA	10.80739905	8.311121137	2.496277916	NA	NA	NA	NA	UW	0	NA	Including folk methods.	0	604	Peru	NA	NA	2017.25	2017.75	2017 DHS	DHS	0	NA	NA	NA	NA	NA	NA
0	7650	15-19	Estimated from data reported for all women and married/in-union women.	NA	NA	NA	20.69310345	16.99655172	3.696551724	NA	NA	NA	NA	UW	0	NA	NA	0	450	Madagascar	16/06/2017	08/08/2017	2017.45	2017.6	2017 TRaC	National survey	0	NA	NA	NA	NA	NA	NA
0	7651	15-19	NA	NA	NA	NA	24.6	NA	NA	NA	NA	NA	NA	UW	0	NA	NA	0	188	Costa Rica	01/07/2015	31/12/2015	2015.5	2016	2015 RHS	RHS	0	NA	NA	NA	NA	NA	NA
0	7652	15-19	NA	NA	NA	NA	20.81738385	18.80851128	2.008872575	15.13687766	NA	NA	NA	UW	0	NA	NA	0	384	CÃ´te d'Ivoire	01/09/2017	31/10/2017	2017.67	2017.83	2017 PMA-R1	PMA	0	NA	NA	NA	NA	NA	NA
0	7653	15-19	NA	NA	NA	NA	6.54445291	5.095669191	1.013816253	5.518271481	NA	NA	NA	UW	0	NA	NA	0	566	Nigeria	01/04/2018	30/05/2018	2018.25	2018.41	2018 PMA-R3	PMA	0	NA	NA	NA	NA	NA	NA
0	7655	15-19	NA	NA	NA	NA	8.324300279	6.995298365	1.329001914	7.396009783	NA	NA	NA	UW	0	NA	NA	0	854	Burkina Faso	01/11/2017	31/01/2018	2017.83	2018.08	2017-2018 PMA-R5	PMA	0	NA	NA	NA	NA	NA	NA
0	7657	15-19	NA	NA	NA	NA	8.164864803	6.673941733	0.765849316	8.852898863	NA	NA	NA	UW	0	NA	NA	0	404	Kenya	01/11/2017	31/12/2017	2017.83	2018	2017 PMA-R6	PMA	0	NA	NA	NA	NA	NA	NA
0	7671	15-19	NA	NA	NA	NA	35.37100468	33.71000344	1.661001233	NA	NA	NA	NA	UW	0	NA	NA	0	840	United States of America	NA	NA	2015.25	2015.75	2015-2017 NSFG	National survey	0	NA	NA	NA	NA	NA	NA
1	4	15-19	NA	NA	NA	NA	24.7	NA	NA	NA	NA	NA	NA	MW	0	NA	NA	0	170	Colombia	NA	NA	1980.25	1980.75	1980 ENH	National survey	0	NA	NA	NA	NA	NA	NA
1	5	15-19	NA	NA	NA	NA	5.527634335			NA	NA	NA	NA	MW	0	NA	NA	1	795	Turkmenistan	NA	NA	2006.25	2006.75	2006 MICS	MICS	0	NA	NA	NA	NA	NA	NA
1	7	15-19	NA	NA	NA	NA	37.1	25.25	11.85	NA	NA	NA	NA	MW	0	NA	NA	0	218	Ecuador	01/04/1999	30/09/1999	1999.25	1999.75	1999 ENDEMAIN-RHS	RHS	0	NA	NA	NA	NA	NA	NA
1	9	15-19	NA	NA	NA	NA	38.5			NA	NA	NA	NA	MW	0	NA	NA	0	360	Indonesia	NA	NA	2005.25	2005.75	2005 SUPAS	National survey	0	NA	NA	NA	NA	NA	NA
1	12	15-19	NA	NA	Data pertain to nationals of the country.	NA	10.4	9.3	1.1	NA	Data pertain to nationals of the country.	NA	NA	MW	0	NA	NA	0	784	United Arab Emirates	NA	NA	1995.25	1995.75	1995 FHS	GFHS	0	NA	NA	NA	NA	NA	NA
1	16	15-19	NA	NA	Data pertain to Peninsular Malaysia.	NA	15.3	12	3	NA	Data pertain to Peninsular Malaysia.	NA	NA	MW	0	NA	NA	0	458	Malaysia	NA	NA	1974.25	1974.75	1974 WFS	WFS	0	NA	NA	NA	NA	NA	NA
1	18	15-19	NA	NA	NA	NA	5.8			NA	NA	NA	NA	MW	0	NA	NA	0	626	Timor-Leste	29/04/2003	27/08/2003	2003.32	2003.65	2003 DHS	National survey	0	NA	NA	NA	NA	NA	NA
1	19	15-19	NA	NA	Data pertain to nationals of the country.	NA	2.7	2.2	0.5	NA	Data pertain to nationals of the country.	NA	NA	MW	0	NA	NA	0	512	Oman	01/11/1987	28/02/1989	1987.83	1989.16	1988-1989 CHS	GFHS	0	NA	NA	NA	NA	NA	NA
1	20	15-19	NA	NA	NA	NA	21.1	20.4	0.7	19.5	NA	NA	NA	MW	0	NA	NA	1	678	Sao Tome and Principe	17/05/2006	20/06/2006	2006.37	2006.47	2006 MICS	MICS	0	NA	NA	NA	NA	NA	NA
1	28	15-19	NA	NA	NA	NA	4.8	1.666666667	3.033333333	NA	NA	NA	NA	MW	0	NA	NA	0	320	Guatemala	NA	NA	1977.25	1977.75	1977-1978 ENF	RHS	0	NA	NA	NA	NA	NA	NA
1	29	15-19	NA	NA	Excluding the West Bank.	NA	9	7	2	NA	Excluding the West Bank.	NA	NA	MW	0	NA	NA	0	400	Jordan	NA	NA	1976.25	1976.75	1976 WFS	WFS	0	NA	NA	NA	NA	NA	NA
1	30	15-19	NA	Traditional methods include folk methods.	NA	NA	44.6	35.9	8.7	NA	NA	NA	NA	MW	0	NA	Including folk methods.	0	600	Paraguay	15/09/1998	30/11/1998	1998.7	1998.91	1998 ENSMI-RHS	RHS	0	NA	NA	NA	NA	NA	NA
1	32	15-19	NA	NA	NA	NA	26.4	25.1	1.3	NA	NA	NA	NA	MW	0	NA	NA	0	12	Algeria	01/06/1992	31/07/1992	1992.42	1992.58	1992 MCH	PAPCHILD	0	NA	NA	NA	NA	NA	NA
1	34	15-19	NA	NA	NA	NA	12.7	9	4	NA	NA	NA	NA	MW	0	NA	NA	0	410	Republic of Korea	01/08/1974	31/12/1974	1974.58	1975	1974 WFS	WFS	0	NA	NA	NA	NA	NA	NA
1	38	15-19	NA	Traditional methods include folk methods.	NA	NA	20.1	NA	NA	NA	NA	NA	NA	MW	0	NA	Including folk methods.	0	218	Ecuador	01/09/1982	01/11/1982	1982.67	1982.83	1982 ESMIVD	CPS	0	NA	NA	NA	NA	NA	NA
1	41	15-19	NA	NA	NA	NA	1.97620433	1.507701827	0.468502504	NA	NA	NA	NA	MW	0	NA	NA	1	694	Sierra Leone	01/10/2005	30/11/2005	2005.75	2005.91	2005 MICS	MICS	0	NA	NA	NA	NA	NA	NA
1	42	15-19	NA	NA	NA	NA	51	NA	NA	NA	NA	NA	NA	MW	0	NA	NA	0	188	Costa Rica	NA	NA	1986.25	1986.75	1986 EFS	RHS	0	NA	NA	NA	NA	NA	NA
1	43	15-19	NA	NA	NA	NA	40.89718466	39.06679854	1.830386123	34.30257254	NA	NA	NA	MW	0	NA	NA	0	516	Namibia	01/11/2006	31/03/2007	2006.83	2007.24	2006-2007 DHS	DHS	0	0.223087353	0.606631876	0.267257011	0.052295371	0.010653718	0.050510187
1	44	15-19	NA	NA	NA	NA	4	0	4	NA	NA	NA	NA	MW	0	NA	NA	0	686	Senegal	24/04/1978	30/10/1978	1978.31	1978.83	1978 WFS	WFS	0	NA	NA	NA	NA	NA	NA
1	46	15-19	NA	NA	NA	NA	36.4	NA	NA	NA	NA	NA	NA	MW	0	NA	NA	0	484	Mexico	31/08/1992	30/11/1992	1992.66	1992.91	1992 ENADID	National survey	0	NA	NA	NA	NA	NA	NA
1	48	15-19	NA	NA	NA	NA	48	40.7	7.3	NA	NA	NA	NA	MW	0	NA	NA	0	222	El Salvador	01/11/2002	30/06/2003	2002.83	2003.49	2002-2003 FESAL	RHS	0	NA	NA	NA	NA	NA	NA
1	49	15-19	NA	NA	NA	NA	45.83124183	43.83520036	1.996041466	27.20833726	NA	NA	NA	MW	0	NA	NA	0	214	Dominican Republic	01/03/2007	30/08/2007	2007.16	2007.66	2007 DHS	DHS	0	0.089718356	0.269735568	0.120348117	0.021983067	0.005257966	0.019633217
1	51	15-19	NA	NA	NA	NA	21.61558049	18.31911698	3.296463515	NA	NA	NA	NA	MW	0	NA	NA	1	760	Syrian Arab Republic	01/05/2006	30/06/2006	2006.33	2006.49	2006 MICS	MICS	0	NA	NA	NA	NA	NA	NA
1	52	15-19	NA	NA	NA	NA	22	8.36	13.64	NA	NA	NA	NA	MW	0	NA	NA	0	604	Peru	NA	NA	1981.25	1981.75	1981 ENPA	CPS	0	NA	NA	NA	NA	NA	NA
1	54	15-19	NA	NA	NA	NA	19.31823567	11.29220442	8.026031245	NA	NA	NA	NA	MW	0	NA	NA	1	140	Central African Republic	01/07/2006	08/11/2006	2006.5	2006.85	2006 MICS	MICS	0	0.117840891	0.154421143	NaN	0.010865382	0.011223079	0
1	105	15-19	NA	NA	NA	NA	29	NA	NA	NA	NA	NA	NA	MW	0	NA	NA	0	764	Thailand	25/03/1981	10/06/1981	1981.23	1981.44	1981 CPS	CPS	0	NA	NA	NA	NA	NA	NA
1	107	15-19	NA	NA	NA	NA	15.3	10	5.3	NA	NA	NA	NA	MW	0	NA	NA	0	268	Georgia	01/11/1999	31/03/2000	1999.83	2000.25	1999 RHS	RHS	0	NA	NA	NA	NA	NA	NA
1	108	15-19	NA	NA	NA	NA	27.6	NA	NA	NA	NA	NA	NA	MW	0	NA	NA	0	52	Barbados	NA	NA	1980.25	1980.75	1980-1981 CPS	CPS	0	NA	NA	NA	NA	NA	NA
1	109	15-19	NA	NA	NA	NA	11			NA	NA	NA	NA	MW	0	NA	NA	0	634	Qatar	NA	NA	1987.25	1987.75	1987 CHS	GFHS	0	NA	NA	NA	NA	NA	NA
1	110	15-19	NA	NA	NA	NA	14	11	3	NA	NA	NA	NA	MW	0	NA	NA	0	484	Mexico	15/07/1976	15/03/1977	1976.54	1977.2	1976-1977 WFS	WFS	0	NA	NA	NA	NA	NA	NA
1	111	15-19	NA	NA	NA	NA	63.15591905	62.83985615	0.316062901	NA	NA	NA	NA	MW	0	NA	NA	0	764	Thailand	NA	NA	2005.25	2005.75	2005-2006 SPC	National survey	0	NA	NA	NA	NA	NA	NA
1	123	15-19	NA	NA	NA	NA	5.7	NA	NA	NA	NA	NA	NA	MW	0	NA	NA	0	356	India	NA	NA	1980.25	1980.75	1980-1981 FPS	National survey	0	NA	NA	NA	NA	NA	NA
1	124	15-19	NA	NA	NA	NA	0			NA	NA	NA	NA	MW	0	NA	NA	0	410	Republic of Korea	NA	NA	1971.25	1971.75	1971 FAS	National survey	0	NA	NA	NA	NA	NA	NA
1	126	15-19	NA	NA	NA	NA	42	34	8	NA	NA	NA	NA	MW	0	NA	NA	0	780	Trinidad and Tobago	NA	NA	1977.25	1977.75	1977 WFS	WFS	0	NA	NA	NA	NA	NA	NA
1	128	15-19	NA	NA	NA	NA	20.3	NA	NA	NA	NA	NA	NA	MW	0	NA	NA	0	484	Mexico	15/09/1979	31/12/1979	1979.7	1980	1979 ENPUMA	CPS	0	NA	NA	NA	NA	NA	NA
1	129	15-19	NA	NA	NA	NA	0.1			NA	NA	NA	NA	MW	0	NA	NA	0	586	Pakistan	01/05/1975	31/12/1975	1975.33	1976	1975 WFS	WFS	0	NA	NA	NA	NA	NA	NA
1	132	15-19	NA	NA	NA	NA	14.3	12.4	1.9	NA	NA	NA	NA	MW	0	NA	NA	0	214	Dominican Republic	NA	NA	1983.25	1983.75	1983 CPS	CPS	0	NA	NA	NA	NA	NA	NA
1	136	15-19	NA	NA	NA	NA	8.322727862	8.081419526	0.241308336	NA	NA	NA	NA	MW	0	NA	NA	1	854	Burkina Faso	29/03/2006	14/06/2006	2006.24	2006.45	2006 MICS	MICS	0	NA	NA	NA	NA	NA	NA
1	139	15-19	NA	Traditional methods include folk methods.	NA	NA	31.4			NA	NA	NA	NA	MW	0	NA	Including folk methods.	0	328	Guyana	01/06/2005	30/09/2005	2005.41	2005.75	2005 AIS	National survey	0	NA	NA	NA	NA	NA	NA
1	141	15-19	NA	NA	NA	NA	7.050821401	0	7.050821401	NA	NA	NA	NA	MW	0	NA	NA	1	706	Somalia	01/08/2006	30/09/2006	2006.58	2006.75	2006 MICS	National survey	0	NA	NA	NA	NA	NA	NA
1	143	15-19	NA	NA	NA	NA	27.1	18.9	8.2	NA	NA	NA	NA	MW	0	NA	NA	0	218	Ecuador	01/07/1994	15/08/1994	1994.5	1994.62	1994 ENDEMAIN-RHS	RHS	0	NA	NA	NA	NA	NA	NA
1	145	15-19	NA	NA	Data pertain to nationals of the country.	NA	29.6	14.1	15.5	NA	Data pertain to nationals of the country.	NA	NA	MW	0	NA	NA	0	48	Bahrain	NA	NA	1989.25	1989.75	1989 CHS	GFHS	0	NA	NA	NA	NA	NA	NA
1	147	15-19	NA	NA	NA	NA	13.9	8.6	5.3	NA	NA	NA	NA	MW	0	NA	NA	0	760	Syrian Arab Republic	01/11/2001	15/12/2001	2001.83	2001.95	2001 FHS	PAPFAM	0	NA	NA	NA	NA	NA	NA
1	148	15-19	NA	NA	NA	NA	3.544543711	2.617697024	0.926846686	NA	NA	NA	NA	MW	0	NA	NA	1	108	Burundi	19/09/2005	31/12/2005	2005.72	2006	2005 MICS	MICS	0	NA	NA	NA	NA	NA	NA
1	149	15-19	NA	NA	NA	NA	26.2	24.1	2.1	NA	NA	NA	NA	MW	0	NA	NA	0	12	Algeria	01/09/2002	30/11/2002	2002.67	2002.91	2002 MCH	PAPFAM	0	NA	NA	NA	NA	NA	NA
1	151	15-19	NA	NA	NA	NA	20.52217842	9.963515728	10.55866269	NA	NA	NA	NA	MW	0	NA	NA	1	368	Iraq	01/02/2006	30/06/2006	2006.08	2006.49	2006 MICS	MICS	0	NA	NA	NA	NA	NA	NA
1	154	15-19	NA	NA	NA	NA	37.3	NA	NA	NA	NA	NA	NA	MW	0	NA	NA	0	84	Belize	30/10/1999	14/12/1999	1999.83	1999.95	1999 FHS	National survey	0	NA	NA	NA	NA	NA	NA
1	155	15-19	NA	NA	NA	NA	33.7	31	2.9	NA	NA	NA	NA	MW	0	NA	NA	0	132	Cabo Verde	01/03/1998	31/08/1998	1998.16	1998.66	1998 DHS-RHS	DHS	0	NA	NA	NA	NA	NA	NA
1	157	15-19	NA	NA	NA	NA	20.2	13.7	6.5	18.1	NA	NA	NA	MW	0	NA	NA	0	340	Honduras	08/06/1987	20/11/1987	1987.43	1987.88	1987 EFHS	National survey	0	NA	NA	NA	NA	NA	NA
1	161	Oct-19	NA	NA	NA	NA	14.6	10.7	3.9	NA	NA	NA	NA	MW	?	NA	NA	0	50	Bangladesh	01/03/1989	01/07/1989	1989.16	1989.5	1989 CPS	CPS	0	NA	NA	NA	NA	NA	NA
1	162	15-19	NA	NA	NA	NA	22.5	18.9	3.4	NA	NA	NA	NA	MW	0	NA	NA	0	222	El Salvador	01/03/1993	15/07/1993	1993.16	1993.53	1993 FESAL	RHS	0	NA	NA	NA	NA	NA	NA
1	164	15-19	NA	NA	NA	NA	9.1	5.9	3.2	NA	NA	NA	NA	MW	0	NA	NA	0	50	Bangladesh	01/10/1983	01/01/1984	1983.75	1984	1983-1984 CPS	CPS	0	NA	NA	NA	NA	NA	NA
1	166	15-19	NA	NA	NA	NA	8.145865864	6.0318229	2.114042964	NA	NA	NA	NA	MW	0	NA	NA	1	288	Ghana	01/08/2006	31/10/2006	2006.58	2006.83	2006 MICS	MICS	0	NA	NA	NA	NA	NA	NA
1	169	15-19	NA	NA	Data pertain to nationals of the country.	NA	8.214198783	NA	NA	NA	Data pertain to nationals of the country.	NA	NA	MW	0	NA	NA	0	682	Saudi Arabia	15/02/1999	15/02/1999	1999.12	1999.12	1999 DS	National survey	0	NA	NA	NA	NA	NA	NA
1	170	15-19	NA	NA	NA	NA	48.29282723	42.65834211	5.634485115	30.61826642	NA	NA	NA	MW	0	NA	NA	0	804	Ukraine	01/07/2007	30/11/2007	2007.5	2007.91	2007 DHS	DHS	0	0.324671574	0.570422871	0.369948277	0.077580285	0.029617592	0.068299571
1	172	15-19	NA	Traditional methods include folk methods.	NA	NA	7.9	4.6	3.3	NA	NA	NA	NA	MW	0	NA	Including folk methods.	0	116	Cambodia	01/05/1998	31/07/1998	1998.33	1998.58	1998 DHS-NS	National survey	0	NA	NA	NA	NA	NA	NA
1	173	15-19	NA	Traditional methods include folk methods.	NA	NA	22.5	18.3	4.2	NA	NA	NA	NA	MW	0	NA	Including folk methods.	0	320	Guatemala	01/04/2002	30/11/2002	2002.25	2002.91	2002 ENSMI	RHS	0	NA	NA	NA	NA	NA	NA
1	175	15-19	NA	NA	NA	NA	68.78465693	68.55148525	0.233171676	NA	NA	NA	NA	MW	0	NA	NA	1	764	Thailand	01/12/2005	28/02/2006	2005.92	2006.16	2005-2006 MICS	MICS	0	NA	NA	NA	NA	NA	NA
1	176	15-19	NA	NA	NA	NA	7.219877768	6.609293628	0.61058414	NA	NA	NA	NA	MW	0	NA	NA	1	624	Guinea-Bissau	12/05/2006	12/06/2006	2006.36	2006.44	2006 MICS	MICS	0	NA	NA	NA	NA	NA	NA
1	179	15-19	NA	NA	NA	NA	6.381395997	3.0394482	3.341947797	16.40152979	NA	NA	NA	MW	0	NA	NA	0	31	Azerbaijan	01/07/2006	30/11/2006	2006.5	2006.91	2006 DHS	DHS	0	0.614065843	0.434878756	0.277478677	0.009943234	0.004802289	0.017918828
1	180	15-19	NA	NA	NA	NA	6.665034198	4.155904215	2.509129983	20.19192495	NA	NA	NA	MW	0	NA	NA	0	586	Pakistan	01/09/2006	28/02/2007	2006.67	2007.16	2006-2007 DHS	DHS	0	0.266300907	0.417342546	0.130052819	0.009126094	0.01005061	0.015891127
1	181	15-19	NA	NA	Data pertain to nationals of the country.	NA	32.6	11.7	20.9	NA	Data pertain to nationals of the country.	NA	NA	MW	0	NA	NA	0	48	Bahrain	NA	NA	1995.25	1995.75	1995 FHS	GFHS	0	NA	NA	NA	NA	NA	NA
1	185	15-19	NA	NA	Data pertain to nationals of the country.	NA	8.2	7.6	0.6	NA	Data pertain to nationals of the country.	NA	NA	MW	0	NA	NA	0	414	Kuwait	NA	NA	1987.25	1987.75	1987 CHS	GFHS	0	NA	NA	NA	NA	NA	NA
1	186	15-19	NA	NA	NA	NA	26	20	6	NA	NA	NA	NA	MW	0	NA	NA	0	170	Colombia	10/05/1976	10/08/1976	1976.36	1976.61	1976 WFS	WFS	0	NA	NA	NA	NA	NA	NA
1	189	15-19	NA	NA	Data pertain to nationals of the country.	NA	14.6	9.8	4.8	NA	Data pertain to nationals of the country.	NA	NA	MW	0	NA	NA	0	512	Oman	01/10/1995	31/12/1995	1995.75	1996	1995 FHS	GFHS	0	NA	NA	NA	NA	NA	NA
1	193	15-19	NA	NA	NA	NA	39.5	NA	NA	NA	NA	NA	NA	MW	0	NA	NA	0	764	Thailand	NA	NA	1984.25	1984.75	1984 CPS	CPS	0	NA	NA	NA	NA	NA	NA
1	194	15-19	NA	NA	Data pertain to nationals of the country.	NA	17	15.3	1.7	NA	Data pertain to nationals of the country.	NA	NA	MW	0	NA	NA	0	682	Saudi Arabia	01/09/1996	30/01/1997	1996.67	1997.08	1996-1997 FHS	GFHS	0	NA	NA	NA	NA	NA	NA
1	199	15-19	NA	NA	NA	NA	27.6	17.8	9.8	NA	NA	NA	NA	MW	0	NA	NA	0	340	Honduras	01/01/1996	30/09/1996	1996	1996.75	1996 ENESF	RHS	0	NA	NA	NA	NA	NA	NA
1	201	15-19	NA	NA	NA	NA	39.9	6.5	33.4	NA	NA	NA	NA	MW	0	NA	NA	0	642	Romania	NA	NA	1993.25	1993.75	1993 RHS	RHS	0	NA	NA	NA	NA	NA	NA
1	204	15-19	NA	NA	NA	NA	33.5	29.9	3.6	NA	NA	NA	NA	MW	0	NA	NA	0	504	Morocco	01/09/1997	31/12/1997	1997.67	1998	1997 ENSME	PAPCHILD	0	NA	NA	NA	NA	NA	NA
1	207	15-19	NA	NA	NA	NA	14.58336406	11.67695415	2.906409908	29.14694639	NA	NA	NA	MW	0	NA	NA	0	320	Guatemala	01/11/1998	31/05/1999	1998.83	1999.41	1998-1999 DHS Interim	National survey	0	0.350701451	0.563729141	0.157140197	0.036733235	0.015898077	0.031457768
1	488	15-19	NA	NA	NA	NA	15.5	12.927	2.573	NA	NA	NA	NA	MW	0	NA	NA	0	360	Indonesia	NA	NA	1979.25	1979.75	Annual SUSENAS	National survey	0	NA	NA	NA	NA	NA	NA
1	633	15-19	NA	NA	NA	NA	46.8	45.3	1.5	NA	NA	NA	NA	MW	0	NA	NA	0	214	Dominican Republic	18/05/2006	15/07/2006	2006.38	2006.53	2006 ENHOGAR-MICS	National survey	0	NA	NA	NA	NA	NA	NA
1	638	15-19	NA	NA	NA	NA	21.3	18.2	3.6	NA	NA	NA	NA	MW	0	NA	NA	0	104	Myanmar	01/03/1997	31/05/1997	1997.16	1997.41	1997 FRHS	National survey	0	NA	NA	NA	NA	NA	NA
1	639	15-19	NA	NA	NA	NA	2	0	2	NA	NA	NA	NA	MW	0	NA	NA	0	426	Lesotho	01/04/1977	31/12/1977	1977.25	1978	1977 WFS	WFS	0	NA	NA	NA	NA	NA	NA
1	640	15-19	NA	NA	NA	NA	41.1	32.3	8.8	16.7	NA	NA	NA	MW	0	NA	NA	0	340	Honduras	01/02/2001	30/09/2001	2001.08	2001.75	2001 ENESF	RHS	0	NA	NA	NA	NA	NA	NA
1	643	15-19	NA	NA	NA	NA	19.7	18.1	1.5	11.1	NA	NA	NA	MW	0	NA	NA	0	818	Egypt	01/11/1998	31/12/1998	1998.83	1999	1998 DHS Interim	National survey	0	NA	NA	NA	NA	NA	NA
1	645	15-19	NA	NA	NA	NA	28.08664469	21.98531549	6.101329208	22.64726743	NA	NA	NA	MW	0	NA	NA	0	894	Zambia	01/04/2007	31/10/2007	2007.25	2007.83	2007 DHS	DHS	0	NA	NA	NA	NA	NA	NA
1	647	15-19	NA	NA	NA	NA	5.173709287	4.388694588	0.785014699	39.92150768	NA	NA	NA	MW	0	NA	NA	0	430	Liberia	01/12/2006	30/04/2007	2006.92	2007.33	2007 DHS	DHS	0	0.375475044	0.923613861	0.19435865	0.015748232	0.007190585	0.044564099
1	649	15-19	NA	NA	NA	NA	60.8	47.6	13.2	NA	NA	NA	NA	MW	0	NA	NA	0	600	Paraguay	01/03/2004	31/07/2004	2004.16	2004.58	2004 ENDSSR-RHS	RHS	0	NA	NA	NA	NA	NA	NA
1	650	15-19	NA	NA	NA	Data pertain to non-pregnant women.	1.4			NA	NA	+	NA	MW	0	NA	NA	0	586	Pakistan	01/10/1984	31/03/1985	1984.75	1985.24	1984-1985 CPS	CPS	0	NA	NA	NA	NA	NA	NA
1	652	15-19	NA	NA	NA	NA	14.66740099			NA	NA	NA	NA	MW	0	NA	NA	1	417	Kyrgyzstan	18/12/2005	03/02/2006	2005.96	2006.09	2005-2006 MICS	MICS	0	NA	NA	NA	NA	NA	NA
1	653	15-19	NA	NA	NA	NA	9.5	NA	NA	NA	NA	NA	NA	MW	0	NA	NA	0	50	Bangladesh	01/05/1981	01/08/1981	1981.33	1981.58	1981 CPS	CPS	0	NA	NA	NA	NA	NA	NA
1	654	15-19	NA	NA	NA	NA	31	30	1	NA	NA	NA	NA	MW	0	NA	NA	0	388	Jamaica	NA	NA	1975.25	1975.75	1975-1976 WFS	WFS	0	NA	NA	NA	NA	NA	NA
1	656	15-19	NA	NA	NA	NA	21.4	18	3.4	11.9	NA	NA	NA	MW	0	NA	NA	0	818	Egypt	01/12/1997	31/01/1998	1997.92	1998.08	1997 DHS	DHS	0	NA	NA	NA	NA	NA	NA
1	663	15-19	NA	NA	NA	NA	11.9	6	5.9	NA	NA	NA	NA	MW	0	NA	NA	0	760	Syrian Arab Republic	NA	NA	1993.25	1993.75	1993 MCHS	PAPCHILD	0	NA	NA	NA	NA	NA	NA
1	667	15-19	NA	NA	NA	NA	56.4	47	9.5	NA	NA	NA	NA	MW	0	NA	NA	0	218	Ecuador	01/03/2004	31/05/2004	2004.16	2004.41	2004 ENDEMAIN-RHS	RHS	0	NA	NA	NA	NA	NA	NA
1	669	15-19	NA	NA	NA	NA	16.71978651	13.40728307	3.312503445	NA	NA	NA	NA	MW	0	NA	NA	1	768	Togo	10/05/2006	24/06/2006	2006.35	2006.48	2006 MICS	MICS	0	NA	NA	NA	NA	NA	NA
1	670	15-19	NA	NA	NA	NA	9	5.4	3.6	NA	NA	NA	NA	MW	0	NA	NA	0	598	Papua New Guinea	24/06/1996	04/08/1997	1996.48	1997.59	1996 DHS	National survey	0	NA	NA	NA	NA	NA	NA
1	671	15-19	NA	NA	Data pertain to nationals of the country.	NA	9.1			NA	Data pertain to nationals of the country.	NA	NA	MW	0	NA	NA	0	634	Qatar	NA	NA	1998.25	1998.75	1998 FHS	GFHS	0	NA	NA	NA	NA	NA	NA
1	673	15-19	NA	NA	NA	NA	8.3	7.9	0.4	NA	NA	NA	NA	MW	0	NA	NA	0	222	El Salvador	01/07/1978	15/12/1978	1978.5	1978.95	1978 FESAL	RHS	0	NA	NA	NA	NA	NA	NA
1	675	15-19	NA	NA	NA	NA	23.5	18.8	4.7	NA	NA	NA	NA	MW	0	NA	NA	0	496	Mongolia	NA	NA	1998.25	1998.75	1998 RHS	National survey	0	NA	NA	NA	NA	NA	NA
1	676	15-19	NA	NA	NA	NA	25	18	7	NA	NA	NA	NA	MW	0	NA	NA	0	218	Ecuador	20/07/1989	01/10/1989	1989.55	1989.75	1989 ENDEMAIN-RHS	RHS	0	NA	NA	NA	NA	NA	NA
1	678	15-19	NA	NA	NA	NA	7.7	NA	NA	NA	NA	NA	NA	MW	0	NA	NA	0	170	Colombia	15/01/1969	03/09/1969	1969.04	1969.67	1969 ENF	National survey	0	NA	NA	NA	NA	NA	NA
1	680	15-19	NA	Traditional methods include folk methods.	NA	NA	6.7	6.2	0.6	26.2	NA	NA	NA	MW	0	NA	Including folk methods.	0	418	Lao People's Dem. Republic	NA	NA	2000.25	2000.75	2000 RHS	National survey	0	NA	NA	NA	NA	NA	NA
1	684	15-19	NA	NA	NA	NA	47.4	27.2	20.2	NA	NA	NA	NA	MW	0	NA	NA	0	804	Ukraine	01/06/1999	31/10/1999	1999.41	1999.83	1999 RHS	RHS	0	NA	NA	NA	NA	NA	NA
1	686	15-19	NA	NA	NA	NA	15.34658155	15.19199016	0.154591392	NA	NA	NA	NA	MW	0	NA	NA	0	360	Indonesia	NA	NA	1985.25	1985.75	1985 IPS	National survey	0	NA	NA	NA	NA	NA	NA
1	688	15-19	NA	NA	NA	NA	45	NA	NA	NA	NA	NA	NA	MW	0	NA	NA	0	484	Mexico	08/09/1997	15/12/1997	1997.68	1997.95	1997 ENADID	National survey	0	NA	NA	NA	NA	NA	NA
1	692	<20	NA	NA	NA	NA	5.6	4.9	0.7	NA	NA	NA	NA	MW	?	NA	NA	0	818	Egypt	NA	NA	1984.25	1984.75	1984 CPS	CPS	0	NA	NA	NA	NA	NA	NA
1	693	15-19	NA	NA	NA	NA	17	NA	NA	NA	NA	NA	NA	MW	0	NA	NA	0	12	Algeria	NA	NA	1986.25	1986.75	1986-1987 ENF	WFS	0	NA	NA	NA	NA	NA	NA
1	694	15-19	NA	NA	NA	NA	7.894297618	2.915269944	4.979027674	26.55770723	NA	NA	NA	MW	0	NA	NA	0	204	Benin	01/08/2006	30/11/2006	2006.58	2006.91	2006 DHS	DHS	0	0.260593471	0.183291451	0.097374029	0.003960017	0.003793796	0.008889935
1	695	15-19	NA	NA	NA	NA	32.4	30.4	2	NA	NA	NA	NA	MW	0	NA	NA	0	504	Morocco	01/04/1995	31/05/1995	1995.25	1995.41	1995 DHS Special	National survey	0	NA	NA	NA	NA	NA	NA
1	696	15-19	NA	NA	NA	NA	37.4	24.8	12.6	NA	NA	NA	NA	MW	0	NA	NA	0	364	Iran (Islamic Republic of)	01/10/2000	01/10/2000	2000.75	2000.75	2000 IDHS	National survey	0	NA	NA	NA	NA	NA	NA
1	702	15-19	NA	NA	NA	NA	18.1	16	2	NA	NA	NA	NA	MW	0	NA	NA	0	764	Thailand	01/04/1975	31/05/1975	1975.25	1975.41	1975 WFS	WFS	0	NA	NA	NA	NA	NA	NA
1	703	15-19	NA	NA	Data pertain to Java and Bali.	NA	13	11	2	NA	Data pertain to Java and Bali.	NA	NA	MW	0	NA	NA	0	360	Indonesia	NA	NA	1976.25	1976.75	1976 WFS	WFS	0	NA	NA	NA	NA	NA	NA
1	707	15-19	NA	NA	NA	NA	21.9	12.6	9.3	21.6	NA	NA	NA	MW	0	NA	NA	0	340	Honduras	NA	NA	1991.25	1991.75	1991-1992 ENESF-RHS	RHS	0	NA	NA	NA	NA	NA	NA
1	709	15-19	NA	NA	NA	NA	5.26	3.51	1.75	NA	NA	NA	NA	MW	0	NA	NA	0	704	Viet Nam	01/05/1988	30/06/1988	1988.33	1988.49	1988 DHS	National survey	0	NA	NA	NA	NA	NA	NA
1	711	15-19	NA	NA	NA	NA	35	NA	NA	NA	NA	NA	NA	MW	0	NA	NA	0	422	Lebanon	01/01/1996	31/03/1996	1996	1996.25	1996 MCHS	PAPCHILD	0	NA	NA	NA	NA	NA	NA
1	715	15-19	NA	NA	NA	NA	13	5	8	NA	NA	NA	NA	MW	0	NA	NA	0	268	Georgia	01/03/2005	31/08/2005	2005.16	2005.66	2005 RHS	RHS	0	NA	NA	NA	NA	NA	NA
1	719	15-19	NA	NA	NA	NA	4.3	NA	NA	NA	NA	NA	NA	MW	0	NA	NA	0	566	Nigeria	12/10/1981	15/08/1982	1981.78	1982.62	1981-1982 WFS	WFS	0	NA	NA	NA	NA	NA	NA
1	721	15-19	NA	NA	NA	NA	22.03873791	20.27242335	1.766314558	NA	NA	NA	NA	MW	0	NA	NA	1	860	Uzbekistan	01/03/2006	15/05/2006	2006.16	2006.37	2006 MICS	MICS	0	NA	NA	NA	NA	NA	NA
1	722	15-19	NA	NA	NA	NA	14	NA	NA	NA	NA	NA	NA	MW	0	NA	NA	0	218	Ecuador	15/07/1979	15/12/1979	1979.53	1979.95	1979 WFS	WFS	0	NA	NA	NA	NA	NA	NA
1	724	15-19	NA	NA	NA	NA	8.625020058	8.020911233	0.604108825	NA	NA	NA	NA	MW	0	NA	NA	1	762	Tajikistan	01/09/2005	31/10/2005	2005.67	2005.83	2005 MICS	MICS	0	NA	NA	NA	NA	NA	NA
1	731	15-19	NA	NA	NA	NA	29	20	9	NA	NA	NA	NA	MW	0	NA	NA	0	862	Venezuela (Bolivarian Republic of)	NA	NA	1977.25	1977.75	1977 WFS	WFS	0	NA	NA	NA	NA	NA	NA
1	734	15-19	NA	NA	NA	NA	13	8	5	NA	NA	NA	NA	MW	0	NA	NA	0	214	Dominican Republic	NA	NA	1975.25	1975.75	1975 WFS	WFS	0	NA	NA	NA	NA	NA	NA
1	738	15-19	NA	NA	NA	NA	41.3	33.9	7.4	NA	NA	NA	NA	MW	0	NA	NA	0	862	Venezuela (Bolivarian Republic of)	NA	NA	1998.25	1998.75	1998 ENPOFAM	National survey	0	NA	NA	NA	NA	NA	NA
1	739	15-19	NA	NA	NA	NA	46.84641764	46.16294771	0.683469923	9.293414072	NA	NA	NA	MW	0	NA	NA	0	360	Indonesia	01/06/2007	29/02/2008	2007.41	2008.16	2007 DHS	DHS	0	0.108503991	0.363101507	0.182063963	0.0268655	0.002451144	0.014129955
1	740	15-19	NA	NA	NA	NA	9.8	5.2	4.6	NA	NA	NA	NA	MW	0	NA	NA	0	887	Yemen	01/01/2003	31/03/2003	2003	2003.24	2003 FHS	PAPFAM	0	NA	NA	NA	NA	NA	NA
1	742	15-19	NA	Traditional methods include folk methods.	NA	NA	47	38	9	NA	NA	NA	NA	MW	0	NA	Including folk methods.	0	188	Costa Rica	NA	NA	1981.25	1981.75	1981 CPS	CPS	0	NA	NA	NA	NA	NA	NA
1	743	15-19	NA	NA	NA	NA	37.2	NA	NA	NA	NA	NA	NA	MW	0	NA	NA	0	788	Tunisia	01/06/2001	31/08/2001	2001.41	2001.66	2001 FHS	PAPFAM	0	NA	NA	NA	NA	NA	NA
1	746	15-19	NA	NA	NA	NA	33.4	25.6	7.7	NA	NA	NA	NA	MW	0	NA	NA	0	222	El Salvador	01/04/1998	30/11/1998	1998.25	1998.91	1998 FESAL	RHS	0	NA	NA	NA	NA	NA	NA
1	749	15-19	NA	NA	NA	NA	4	2	2	NA	NA	NA	NA	MW	0	NA	NA	0	50	Bangladesh	NA	NA	1975.25	1975.75	1975-1976 WFS	WFS	0	NA	NA	NA	NA	NA	NA
1	753	15-19	NA	NA	NA	NA	2	1	1	NA	NA	NA	NA	MW	0	NA	NA	0	404	Kenya	NA	NA	1977.25	1977.75	1977-1978 WFS	WFS	0	NA	NA	NA	NA	NA	NA
1	757	15-19	NA	NA	NA	NA	16.7	0	16.7	NA	NA	NA	NA	MW	0	NA	NA	0	434	Libya	NA	NA	1995.25	1995.75	1995 MCH	PAPCHILD	0	NA	NA	NA	NA	NA	NA
1	776	15-19	NA	NA	NA	NA	1.6	NA	NA	NA	NA	NA	NA	MW	0	NA	NA	0	120	Cameroon	NA	NA	1978.25	1978.75	1978 WFS	WFS	0	NA	NA	NA	NA	NA	NA
1	778	15-19	NA	NA	NA	NA	25.43608406	22.97027673	2.465807334	9.037253455	NA	NA	NA	MW	0	NA	NA	0	818	Egypt	01/05/2003	30/06/2003	2003.33	2003.49	2003 DHS Interim	National survey	0	0.152991661	0.374078635	0.214706827	0.015532046	0.002254409	0.01097935
1	779	15-19	NA	NA	NA	Including visiting unions.	26.2	23.55	2.55	NA	NA	NA	+-	MW	0	NA	NA	0	84	Belize	15/01/1991	19/02/1991	1991.04	1991.13	1991 FHS	RHS	0	NA	NA	NA	NA	NA	NA
1	782	15-19	NA	Traditional methods include folk methods.	NA	NA	41.6	30.5	11.1	6.1	NA	NA	NA	MW	0	NA	Including folk methods.	0	600	Paraguay	01/10/1995	29/02/1996	1995.75	1996.16	1995-1996 ENDSR-RHS	RHS	0	NA	NA	NA	NA	NA	NA
1	788	15-19	NA	NA	NA	NA	56.9	56	0.9	NA	NA	NA	NA	MW	0	NA	NA	0	764	Thailand	NA	NA	1995.25	1995.75	1995-1996 SPC	National survey	0	NA	NA	NA	NA	NA	NA
1	789	15-19	NA	NA	NA	NA	17	6	11	NA	NA	NA	NA	MW	0	NA	NA	0	604	Peru	01/07/1977	31/05/1978	1977.5	1978.41	1977-1978 WFS	WFS	0	NA	NA	NA	NA	NA	NA
1	791	15-19	NA	NA	NA	NA	17	2	15	NA	NA	NA	NA	MW	0	NA	NA	0	332	Haiti	NA	NA	1977.25	1977.75	1977 WFS	WFS	0	NA	NA	NA	NA	NA	NA
1	795	15-19	NA	NA	NA	NA	18	14	3	NA	NA	NA	NA	MW	0	NA	NA	0	214	Dominican Republic	NA	NA	1980.25	1980.75	1980 WFS	WFS	0	NA	NA	NA	NA	NA	NA
1	796	15-19	NA	Traditional methods include folk methods.	NA	NA	19	14	5	NA	NA	NA	NA	MW	0	NA	Including folk methods.	0	600	Paraguay	NA	NA	1979.25	1979.75	1979 WFS	WFS	0	NA	NA	NA	NA	NA	NA
1	801	15-19	NA	NA	NA	NA	9.2	5.8	3.4	NA	NA	NA	NA	MW	0	NA	NA	0	50	Bangladesh	01/12/1985	01/04/1986	1985.92	1986.25	1985-1986 CPS	CPS	0	NA	NA	NA	NA	NA	NA
1	805	15-19	NA	NA	NA	NA	14.9	12.3	2.6	NA	NA	NA	NA	MW	0	NA	NA	0	818	Egypt	01/01/1991	31/03/1991	1991	1991.24	1991 PAPCHILD	PAPCHILD	0	NA	NA	NA	NA	NA	NA
1	807	15-19	NA	NA	NA	NA	15.1	8.1	7	NA	NA	NA	NA	MW	0	NA	NA	0	275	State of Palestine	01/07/2004	07/07/2004	2004.5	2004.51	2004 DHS	National survey	0	NA	NA	NA	NA	NA	NA
1	809	15-19	NA	NA	NA	NA	47.9	NA	NA	NA	NA	NA	NA	MW	0	NA	NA	0	388	Jamaica	NA	NA	1989.25	1989.75	1989 CPS	CPS	0	NA	NA	NA	NA	NA	NA
1	813	15-19	NA	NA	NA	NA	16.1	8.1	8	NA	NA	NA	NA	MW	0	NA	NA	0	275	State of Palestine	NA	NA	2000.25	2000.75	2000 HS	National survey	0	NA	NA	NA	NA	NA	NA
1	815	15-19	NA	NA	Data pertain to nationals of the country.	NA	21	17.3	3.7	NA	Data pertain to nationals of the country.	NA	NA	MW	0	NA	NA	0	414	Kuwait	NA	NA	1996.25	1996.75	1996 FHS	GFHS	0	NA	NA	NA	NA	NA	NA
1	816	15-19	NA	NA	NA	NA	25.1	24.5	0.6	NA	NA	NA	NA	MW	0	NA	NA	0	104	Myanmar	NA	NA	2001.25	2001.75	2001 FRHS	National survey	0	NA	NA	NA	NA	NA	NA
1	818	15-19	NA	NA	NA	NA	0.4			NA	NA	NA	NA	MW	0	NA	NA	0	524	Nepal	01/04/1976	30/06/1976	1976.25	1976.49	1976 WFS	WFS	0	NA	NA	NA	NA	NA	NA
1	820	15-19	NA	NA	NA	NA	17.1	16.5	0.6	NA	NA	NA	NA	MW	0	NA	NA	0	222	El Salvador	02/05/1988	24/07/1988	1988.33	1988.56	1988 FESAL	RHS	0	NA	NA	NA	NA	NA	NA
1	821	15-19	NA	NA	NA	NA	16.1	5	11	NA	NA	NA	NA	MW	0	NA	NA	0	608	Philippines	27/02/1978	18/06/1978	1978.16	1978.46	1978 WFS	WFS	0	NA	NA	NA	NA	NA	NA
1	822	15-19	NA	NA	NA	NA	5.2	3.6	1.6	NA	NA	NA	NA	MW	0	NA	NA	0	50	Bangladesh	01/09/1979	01/01/1980	1979.67	1980	1979-1980 CPS	CPS	0	NA	NA	NA	NA	NA	NA
1	826	15-19	NA	NA	NA	NA	19.7	11.4	8.3	NA	NA	NA	NA	MW	0	NA	NA	0	72	Botswana	01/03/1984	01/07/1984	1984.16	1984.5	1984 FHS (CPS)	CPS	0	NA	NA	NA	NA	NA	NA
1	828	<20	NA	NA	NA	NA	15	NA	NA	NA	NA	NA	NA	MW	?	NA	NA	0	50	Bangladesh	01/12/1988	01/04/1989	1988.92	1989.25	1988-1989 FS	National survey	0	NA	NA	NA	NA	NA	NA
1	830	15-19	NA	Traditional methods include folk methods.	NA	NA	12.4	12.1	0.3	NA	NA	NA	NA	MW	0	NA	Including folk methods.	0	800	Uganda	01/08/2004	31/01/2005	2004.58	2005.08	2004-2005 AIS	National survey	0	NA	NA	NA	NA	NA	NA
1	831	15-19	NA	NA	NA	NA	10.55983268	7.520452929	3.03937975	14.79027511	NA	NA	NA	MW	0	NA	NA	0	834	United Republic of Tanzania	01/09/1999	30/11/1999	1999.67	1999.91	1999 RCHS	DHS	0	0.285344324	0.47112263	0.235278697	0.014195559	0.009406319	0.026801159
1	1151	15-19	NA	NA	NA	NA	36.1	NA	NA	31.3	NA	NA	NA	MW	0	NA	NA	0	484	Mexico	23/10/1995	18/11/1995	1995.81	1995.88	1995 ENPF	National survey	0	NA	NA	NA	NA	NA	NA
1	1669	15-19	NA	NA	NA	NA	38.33844895	24.39375534	13.94469361	16.83314004	NA	NA	NA	MW	0	NA	NA	0	398	Kazakhstan	01/07/1999	30/09/1999	1999.5	1999.75	1999 DHS	DHS	0	0.427131761	0.538405299	0.376034114	0.022361722	0.007701837	0.031174604
1	1670	15-19	NA	NA	NA	NA	14.2	1.5	12.7	NA	NA	NA	NA	MW	0	NA	NA	0	31	Azerbaijan	01/04/2001	31/07/2001	2001.25	2001.58	2001 RHS	RHS	0	NA	NA	NA	NA	NA	NA
1	1671	15-19	NA	NA	NA	NA	17.37555492	13.32890808	4.046646836	38.71988009	NA	NA	NA	MW	0	NA	NA	0	214	Dominican Republic	01/07/1991	30/11/1991	1991.5	1991.91	1991 DHS	DHS	0	0.18908154	0.44063519	0.148065397	0.013498313	0.01609255	0.020870928
1	1672	15-19	NA	NA	NA	NA	21.6894684	20.49998323	1.189485168	NA	NA	NA	NA	MW	0	NA	NA	0	222	El Salvador	01/05/1985	31/07/1985	1985.33	1985.58	1985 DHS	DHS	0	NA	NA	NA	NA	NA	NA
1	1674	15-19	NA	NA	NA	NA	15.41242371	2.485529907	12.9268938	19.89404214	NA	NA	NA	MW	0	NA	NA	0	120	Cameroon	01/02/1998	30/06/1998	1998.08	1998.49	1998 DHS	DHS	0	0.329765446	0.198213955	0.137336207	0.00452692	0.016248655	0.017126333
1	1675	15-19	NA	NA	NA	NA	3.099868099	0.841567067	2.258301032	11.77415055	NA	NA	NA	MW	0	NA	NA	0	148	Chad	01/12/1996	31/07/1997	1996.92	1997.58	1996-1997 DHS	DHS	0	0.329541311	0.230055034	0.119756948	0.002661885	0.005061198	0.011893516
1	1676	15-19	NA	NA	NA	NA	24.5	21.4	3.1	NA	NA	NA	NA	MW	0	NA	NA	0	426	Lesotho	13/05/2001	30/06/2001	2001.36	2001.49	2001 DS	National survey	0	NA	NA	NA	NA	NA	NA
1	1677	15-19	NA	NA	NA	NA	15	8.3	6.7	NA	NA	NA	NA	MW	0	NA	NA	0	834	United Republic of Tanzania	01/07/1994	30/09/1994	1994.5	1994.75	1994 KAP Survey	National survey	0	NA	NA	NA	NA	NA	NA
1	1678	15-19	NA	NA	NA	NA	5.232607189	1.653929086	3.578678103	20.17896988	NA	NA	NA	MW	0	NA	NA	0	834	United Republic of Tanzania	01/10/1991	31/03/1992	1991.75	1992.25	1991-1992 DHS	DHS	0	0.424878897	0.276348006	0.111990701	0.00459655	0.006931692	0.013797821
1	1679	15-19	NA	NA	NA	NA	7.40073179	4.364572624	3.036159166	20.32318577	NA	NA	NA	MW	0	NA	NA	0	834	United Republic of Tanzania	01/07/1996	30/11/1996	1996.5	1996.91	1996 DHS	DHS	0	0.24737247	0.355277754	0.130358823	0.00802175	0.005749991	0.009550286
1	1680	15-19	NA	NA	NA	NA	6.084793418	2.035821294	4.048972124	18.20771607	NA	NA	NA	MW	0	NA	NA	0	562	Niger	01/03/1998	31/07/1998	1998.16	1998.58	1998 DHS	DHS	0	0.229158038	0.193955287	0.100235943	0.004243176	0.007508014	0.013905389
1	1681	15-19	NA	NA	NA	NA	48.9	NA	NA	NA	NA	NA	NA	MW	0	NA	NA	0	8	Albania	01/08/2002	31/12/2002	2002.58	2003	2002 RHS	RHS	0	NA	NA	NA	NA	NA	NA
1	1682	15-19	NA	NA	NA	NA	7.681697768	5.820682839	1.861014929	34.83276397	NA	NA	NA	MW	0	NA	NA	0	466	Mali	01/05/2006	31/12/2006	2006.33	2007	2006 DHS	DHS	0	0.131014977	0.219156443	0.085672595	0.003698218	0.002630651	0.014982416
1	1683	15-19	NA	NA	NA	NA	15.46961326	11.60220994	3.867403315	NA	NA	NA	NA	MW	0	NA	NA	0	218	Ecuador	01/01/1987	31/03/1987	1987	1987.24	1987 DHS	DHS	0	NA	NA	NA	NA	NA	NA
1	1684	15-19	NA	NA	NA	NA	32.52015147	28.12271599	4.397435478	35.81837267	NA	NA	NA	MW	0	NA	NA	0	214	Dominican Republic	01/08/1999	31/12/1999	1999.58	2000	1999 DHS	DHS	0	0.388028201	0.731746646	0.363462428	0.077836171	0.030543185	0.0820308
1	1685	15-19	NA	NA	NA	NA	34.90817227	30.10126524	4.806907033	28.68220027	NA	NA	NA	MW	0	NA	NA	0	214	Dominican Republic	01/09/1996	31/12/1996	1996.67	1997	1996 DHS	DHS	0	0.132980858	0.255290292	0.145251393	0.018869559	0.006952157	0.017536624
1	1686	15-19	NA	NA	NA	NA	35.44245501	26.27472758	9.167727431	21.24683385	NA	NA	NA	MW	0	NA	NA	0	600	Paraguay	01/05/1990	31/08/1990	1990.33	1990.66	1990 DHS	DHS	0	0.170061366	0.259690668	0.193095222	0.031898002	0.020939977	0.030120815
1	1687	15-19	NA	NA	NA	NA	29.99070546	29.05151334	0.93919212	19.01267535	NA	NA	NA	MW	0	NA	NA	0	360	Indonesia	01/05/1991	31/07/1991	1991.33	1991.58	1991 DHS	DHS	0	0.115720927	0.433006571	0.115715116	0.004668843	4.48E-04	0.003075695
1	1688	15-19	NA	NA	NA	NA	36.39827571	35.61606151	0.782214206	15.01458742	NA	NA	NA	MW	0	NA	NA	0	360	Indonesia	01/07/1994	30/11/1994	1994.5	1994.91	1994 DHS	DHS	0	0.117192102	0.534127186	0.127594554	0.008233262	5.34E-04	0.004397016
1	1689	15-19	NA	NA	NA	NA	47.29467992	46.80043599	0.494243932	6.887692923	NA	NA	NA	MW	0	NA	NA	0	360	Indonesia	01/10/2002	30/04/2003	2002.75	2003.33	2002-2003 DHS	DHS	0	0.114003678	0.592410326	0.178122546	0.009547377	3.21E-04	0.006414062
1	1690	15-19	NA	NA	NA	NA	44.54546452	44.33613098	0.209333541	10.52029584	NA	NA	NA	MW	0	NA	NA	0	360	Indonesia	01/09/1997	31/12/1997	1997.67	1998	1997 DHS	DHS	0	0.096831888	0.394520231	0.147353866	0.009007574	2.93E-04	0.003575431
1	1692	15-19	NA	NA	NA	NA	16.40030264	12.66272758	3.737575056	30.22898919	NA	NA	NA	MW	0	NA	NA	0	404	Kenya	01/04/2003	30/09/2003	2003.25	2003.75	2003 DHS	DHS	0	0.179132505	0.312644735	0.145679789	0.006852163	0.002617247	0.009722067
1	1693	15-19	NA	NA	NA	NA	25.52185289	23.22111985	2.300733039	NA	NA	NA	NA	MW	0	NA	NA	0	360	Indonesia	01/09/1987	31/12/1987	1987.67	1988	1987 CPS	DHS	0	NA	NA	NA	NA	NA	NA
1	1694	15-19	NA	NA	NA	NA	3.88716999	3.041405784	0.845764206	37.53909056	NA	NA	NA	MW	0	NA	NA	0	231	Ethiopia	01/02/2000	31/05/2000	2000.08	2000.41	2000 DHS	DHS	0	0.268287744	0.55834466	0.102102651	0.005736822	0.001443037	0.017895472
1	1695	15-19	NA	NA	NA	NA	42.78403896			24.5679018	NA	NA	NA	MW	0	NA	NA	0	748	Eswatini	01/07/2006	28/02/2007	2006.5	2007.16	2006-2007 DHS	DHS	0	0.21056897	NaN	0.306441405	0.051545808	0	0.0468634
1	1696	15-19	NA	NA	NA	NA	25.53649911	19.05482042	6.481678696	23.00795075	NA	NA	NA	MW	0	NA	NA	0	894	Zambia	01/11/2001	31/05/2002	2001.83	2002.41	2001-2002 DHS	DHS	0	0.120611232	0.174704413	0.127408038	0.010574877	0.005458234	0.00900444
1	1697	15-19	NA	NA	NA	NA	30	28.33333333	1.666666667	NA	NA	NA	NA	MW	0	NA	NA	0	716	Zimbabwe	01/09/1988	31/01/1989	1988.67	1989.08	1988 DHS	DHS	0	NA	NA	NA	NA	NA	NA
1	1698	15-19	NA	NA	NA	NA	36.71201537	35.74053928	0.971476097	18.75666692	NA	NA	NA	MW	0	NA	NA	0	716	Zimbabwe	01/08/2005	28/02/2006	2005.58	2006.16	2005-2006 DHS	DHS	0	0.164937869	0.604531879	0.130004478	0.00883455	0.001006923	0.007619296
1	1699	15-19	NA	NA	NA	NA	16.89051705	8.794811964	8.09570509	22.20105591	NA	NA	NA	MW	0	NA	NA	0	894	Zambia	01/07/1996	31/01/1997	1996.5	1997.08	1996 DHS	DHS	0	0.167431702	0.1934618	0.122510821	0.008387113	0.005950938	0.01641076
1	1700	15-19	NA	NA	NA	NA	42.14967531	38.60829216	3.541383156	13.01514188	NA	NA	NA	MW	0	NA	NA	0	716	Zimbabwe	01/09/1999	31/12/1999	1999.67	2000	1999 DHS	DHS	0	0.128421973	0.295273599	0.191900298	0.024460735	0.0081707	0.011594548
1	1701	15-19	NA	NA	NA	NA	31.41579506	29.8117363	1.604058753	22.39467191	NA	NA	NA	MW	0	NA	NA	0	716	Zimbabwe	01/07/1994	30/11/1994	1994.5	1994.91	1994 DHS	DHS	0	0.155724937	0.431034679	0.154198071	0.015650147	0.001734992	0.010936367
1	1702	15-19	NA	Traditional methods include folk methods.	NA	NA	8.6	2.7	6	32.3	NA	NA	NA	MW	0	NA	Including folk methods.	0	887	Yemen	01/10/1997	31/12/1997	1997.75	1998	1997 DHS	DHS	0	NA	NA	NA	NA	NA	NA
1	1703	15-19	NA	NA	NA	NA	5.089077076	1.253031944	3.836045132	60.48047215	NA	NA	NA	MW	0	NA	NA	0	887	Yemen	01/11/1991	31/01/1992	1991.83	1992.08	1991-1992 DHS	DHS	0	0.377730117	0.33805756	0.110648906	0.003499104	0.012389128	0.025256741
1	1705	15-19	NA	NA	NA	NA	5.02822584	4.672274575	0.355951264	33.2792146	NA	NA	NA	MW	0	NA	NA	0	686	Senegal	01/02/2005	31/05/2005	2005.08	2005.41	2005 DHS	DHS	0	0.21302426	0.451821305	0.070150603	0.009486061	0.001601856	0.015277261
1	1707	15-19	NA	NA	NA	NA	10.46511628	4.651162791	5.813953488	50	NA	NA	NA	MW	0	NA	NA	0	174	Comoros	01/03/1996	31/05/1996	1996.16	1996.41	1996 DHS	DHS	0	0.483739843	0.539650006	0.267377924	0.021262369	0.029364592	0.061651061
1	1708	15-19	NA	NA	NA	NA	6.423838164	0.542590396	5.881247767	24.22663328	NA	NA	NA	MW	0	NA	NA	0	450	Madagascar	01/05/1992	30/11/1992	1992.33	1992.91	1992 DHS	DHS	0	0.569473971	0.258554922	0.152763762	4.65E-04	0.013593239	0.027106248
1	1709	15-19	NA	NA	NA	NA	37.2053848	11.09235239	26.11303241	30.33153632	NA	NA	NA	MW	0	NA	NA	0	178	Congo	01/07/2005	30/11/2005	2005.5	2005.91	2005 DHS	DHS	0	0.229511457	0.184363923	0.201868761	0.015568917	0.019727157	0.021041076
1	1710	15-19	NA	NA	NA	NA	41.52821852	37.62692103	3.90129749	30.45980839	NA	NA	NA	MW	0	NA	NA	0	214	Dominican Republic	01/07/2002	31/12/2002	2002.5	2003	2002 DHS	DHS	0	0.092636822	0.222686255	0.111355029	0.021704424	0.008342033	0.019692323
1	1711	15-19	NA	NA	NA	NA	24.58960419	20.0309506	4.55865359	NA	NA	NA	NA	MW	0	NA	NA	0	214	Dominican Republic	01/09/1986	31/12/1986	1986.67	1987	1986 DHS	DHS	0	NA	NA	NA	NA	NA	NA
1	1712	15-19	NA	NA	NA	NA	28.94149065	21.23746357	7.704027077	NA	NA	NA	NA	MW	0	NA	NA	0	170	Colombia	01/09/1986	31/12/1986	1986.67	1987	1986 DHS	DHS	0	NA	NA	NA	NA	NA	NA
1	1714	15-19	NA	NA	NA	NA	4.930396291	3.987648909	0.942747381	31.53590042	NA	NA	NA	MW	0	NA	NA	0	466	Mali	01/01/2001	31/05/2001	2001	2001.41	2001 DHS	DHS	0	0.183753436	0.368442147	0.078577565	0.006135815	0.003194319	0.014872042
1	1715	15-19	NA	NA	NA	NA	4.592825641	2.385787549	2.207038091	29.43364008	NA	NA	NA	MW	0	NA	NA	0	466	Mali	01/11/1995	31/05/1996	1995.83	1996.41	1995-1996 DHS	DHS	0	0.259114113	0.241857534	0.085782184	0.004937277	0.003316224	0.014024063
1	1716	15-19	NA	NA	NA	NA	4.30656591	0.55265763	3.75390828	NA	NA	NA	NA	MW	0	NA	NA	0	108	Burundi	01/03/1987	31/07/1987	1987.16	1987.58	1987 DHS	DHS	0	NA	NA	NA	NA	NA	NA
1	1717	15-19	NA	NA	NA	NA	3.240173455			21.87994191	NA	NA	NA	MW	0	NA	NA	0	646	Rwanda	01/02/2005	31/07/2005	2005.08	2005.58	2005 DHS	DHS	0	0.708278209	NaN	0.309423723	0.015930309	0	0.040550785
1	1718	15-19	NA	NA	NA	NA	20.23061279	10.72721873	9.50339406	NA	NA	NA	NA	MW	0	NA	NA	0	144	Sri Lanka	01/01/1987	31/03/1987	1987	1987.24	1987 DHS	DHS	0	NA	NA	NA	NA	NA	NA
1	1720	15-19	NA	NA	NA	NA	47			NA	NA	NA	NA	MW	0	NA	NA	0	710	South Africa	01/10/2003	31/08/2004	2003.75	2004.66	2003 DHS	DHS	0	NA	NA	NA	NA	NA	NA
1	1721	15-19	NA	NA	NA	NA	49.41417841	48.23455366	1.179624752	26.81540763	NA	NA	NA	MW	0	NA	NA	0	710	South Africa	01/01/1998	30/09/1998	1998	1998.75	1998 DHS	DHS	0	0.272936666	1.024535231	0.346218891	0.023478822	0.002177951	0.032708242
1	1723	15-19	NA	NA	NA	NA	9.934389195	3.862443384	6.07194581	25.14085978	NA	NA	NA	MW	0	NA	NA	0	800	Uganda	01/03/1995	31/08/1995	1995.16	1995.66	1995 DHS	DHS	0	0.239476302	0.197280587	0.106258154	0.006373028	0.006301482	0.013342016
1	1724	15-19	NA	NA	NA	NA	19.04551769	12.37021166	6.675306022	20.64648041	NA	NA	NA	MW	0	NA	NA	0	400	Jordan	01/06/1997	31/10/1997	1997.41	1997.83	1997 DHS	DHS	0	0.220542347	0.283456746	0.18759994	0.020272243	0.012122002	0.024663687
1	1725	15-19	NA	NA	NA	NA	21.27503416	13.39215725	7.882876904	20.42491912	NA	NA	NA	MW	0	NA	NA	0	400	Jordan	01/07/2002	30/09/2002	2002.5	2002.75	2002 DHS	DHS	0	0.265115314	0.371009031	0.237233648	0.030790266	0.026936799	0.038217075
1	1727	15-19	NA	NA	NA	NA	12.28930573	3.881006526	8.408299201	25.69275608	NA	NA	NA	MW	0	NA	NA	0	400	Jordan	01/10/1990	31/12/1990	1990.75	1991	1990 DHS	DHS	0	0.318822763	0.23519096	0.147917489	0.009043364	0.013229641	0.018772927
1	1728	15-19	NA	NA	Excluding the West Bank.	NA	4	NA	NA	NA	Excluding the West Bank.	NA	NA	MW	0	NA	NA	0	400	Jordan	01/07/1983	07/10/1983	1983.5	1983.76	1983 FFHS	RHS	0	NA	NA	NA	NA	NA	NA
1	1729	15-19	NA	NA	NA	NA	5.535945567	2.493192239	3.042753328	24.53012374	NA	NA	NA	MW	0	NA	NA	0	450	Madagascar	01/09/1997	31/12/1997	1997.67	1998	1997 DHS	DHS	0	0.333792325	0.328757641	0.116860985	0.004727897	0.003534409	0.003634059
1	1730	15-19	NA	NA	NA	NA	2.195121951	0.487804878	1.707317073	27.56097561	NA	NA	NA	MW	0	NA	NA	0	686	Senegal	01/11/1992	31/08/1993	1992.83	1993.66	1992-1993 DHS	DHS	0	0.711917936	0.383472259	0.110236315	0.003455572	0.006434829	0.022046925
1	1731	15-19	NA	NA	NA	NA	2.168232546	0.849320617	1.318911928	16.76019892	NA	NA	NA	MW	0	NA	NA	0	562	Niger	01/03/1992	30/06/1992	1992.16	1992.49	1992 DHS	DHS	0	0.311911228	0.376567084	0.13843758	0.001734717	0.004808665	0.017676643
1	1732	15-19	NA	NA	NA	NA	12.47091323	1.514833968	10.95607926	18.42534646	NA	NA	NA	MW	0	NA	NA	0	140	Central African Republic	01/09/1994	31/03/1995	1994.67	1995.24	1994-1995 DHS	DHS	0	0.460937128	0.168608209	0.123849951	0.005731121	0.013773796	0.013039126
1	1733	15-19	NA	NA	NA	NA	29.72377903	24.35410747	5.369671561	NA	NA	NA	NA	MW	0	NA	NA	0	484	Mexico	01/02/1987	31/05/1987	1987.08	1987.41	1987 DHS	DHS	0	NA	NA	NA	NA	NA	NA
1	1734	15-19	NA	NA	NA	NA	12.74737607	10.65127215	2.09610392	20.52702293	NA	NA	NA	MW	0	NA	NA	0	450	Madagascar	01/11/2003	31/03/2004	2003.83	2004.25	2003-2004 DHS	DHS	0	0.245421257	0.411406911	0.196428571	0.009251346	0.002618467	0.004431991
1	1735	15-19	NA	NA	NA	NA	15.04190527	4.246802639	10.79510263	41.20130425	NA	NA	NA	MW	0	NA	NA	0	768	Togo	01/02/1998	31/05/1998	1998.08	1998.41	1998 DHS	DHS	0	0.331925207	0.171369275	0.132252984	0.006547587	0.006166389	0.017996836
1	1736	15-19	NA	NA	NA	NA	4.285589858	3.489966055	0.795623803	11.15618611	NA	NA	NA	MW	0	NA	NA	0	562	Niger	01/01/2006	31/05/2006	2006	2006.41	2006 DHS	DHS	0	0.215224864	0.42172407	0.114735858	0.003980331	0.001262634	0.005876223
1	1737	15-19	NA	NA	NA	NA	40.1003409	13.39115972	26.70918117	29.09622527	NA	NA	NA	MW	0	NA	NA	0	266	Gabon	01/07/2000	31/01/2001	2000.5	2001.08	2000 DHS	DHS	0	0.181893305	0.147374352	0.17510299	0.018167787	0.023749281	0.022591776
1	1738	15-19	NA	NA	NA	NA	0.7	0	0.7	25.7	NA	NA	NA	MW	0	NA	NA	0	324	Guinea	01/05/1992	31/07/1992	1992.33	1992.58	1992 DHS	DHS	0	NA	NA	NA	NA	NA	NA
1	1739	15-19	NA	NA	NA	NA	3.426585893	2.332814601	1.093771292	19.22394394	NA	NA	NA	MW	0	NA	NA	0	324	Guinea	01/05/1999	31/07/1999	1999.33	1999.58	1999 DHS	DHS	0	0.304045826	0.410045823	0.118835512	0.00368658	0.001659647	0.010906933
1	1740	15-19	NA	NA	NA	NA	8.800711091	4.985807103	3.814903987	19.52565439	NA	NA	NA	MW	0	NA	NA	0	324	Guinea	01/02/2005	30/06/2005	2005.08	2005.49	2005 DHS	DHS	0	0.254017783	0.259526855	0.111157944	0.00517556	0.003632109	0.006474959
1	1741	15-19	NA	NA	NA	NA	42.44604317	30.21582734	12.23021583	NA	NA	NA	NA	MW	0	NA	NA	0	780	Trinidad and Tobago	01/05/1987	31/08/1987	1987.33	1987.66	1987 DHS	DHS	0	NA	NA	NA	NA	NA	NA
1	1742	15-19	NA	NA	NA	NA	1.326348219	0.60894471	0.717403509	23.71974486	NA	NA	NA	MW	0	NA	NA	0	566	Nigeria	01/04/1990	31/10/1990	1990.25	1990.83	1990 DHS	DHS	0	0.464701973	0.574844606	0.116934386	0.00156237	0.002808136	0.015135392
1	1743	15-19	NA	NA	NA	NA	22.76952076	14.14351521	8.626005547	14.89513558	NA	NA	NA	MW	0	NA	NA	0	704	Viet Nam	01/10/2002	31/12/2002	2002.75	2003	2002 DHS	DHS	0	0.477185841	0.515876899	0.387451328	0.058603177	0.041367518	0.047039008
1	1751	15-19	NA	NA	NA	NA	19.21069195	12.58017763	6.630514326	50.70018751	NA	NA	NA	MW	0	NA	NA	0	288	Ghana	01/11/1998	28/02/1999	1998.83	1999.16	1998 DHS	DHS	0	0.275303147	0.390383854	0.195508883	0.022920631	0.01168341	0.030325229
1	1752	15-19	NA	NA	NA	NA	8.415869469	6.862253223	1.553616247	56.80048001	NA	NA	NA	MW	0	NA	NA	0	288	Ghana	01/07/2003	31/10/2003	2003.5	2003.83	2003 DHS	DHS	0	0.343984461	0.653021267	0.201830752	0.006125701	0.002896478	0.020463717
1	1753	15-19	NA	NA	NA	NA	4.597701149	2.298850575	2.298850575	NA	NA	NA	NA	MW	0	NA	NA	0	288	Ghana	01/02/1988	30/06/1988	1988.08	1988.49	1988 DHS	DHS	0	NA	NA	NA	NA	NA	NA
1	1754	15-19	NA	NA	NA	NA	13.04347826	8.074534161	4.968944099	48.44720497	NA	NA	NA	MW	0	NA	NA	0	288	Ghana	01/09/1993	28/02/1994	1993.67	1994.16	1993 DHS	DHS	0	0.287714483	0.367378248	0.189712598	0.021307159	0.017308253	0.042993383
1	1755	15-19	NA	NA	NA	NA	47.96243596	22.8268296	25.13560636	20.85016515	NA	NA	NA	MW	0	NA	NA	0	792	Turkey	01/12/2003	31/05/2004	2003.92	2004.41	2003 DHS	DHS	0	0.207844677	0.221577325	0.252340681	0.01472551	0.045123673	0.022866532
1	1756	15-19	NA	NA	NA	NA	33.56175523	15.72907266	17.83268257	25.6687046	NA	NA	NA	MW	0	NA	NA	0	792	Turkey	01/08/1998	30/11/1998	1998.58	1998.91	1998 DHS	DHS	0	0.183454596	0.174904328	0.151772261	0.013257753	0.01568906	0.013539006
1	1757	15-19	NA	NA	NA	NA	24.07148958	9.295027497	14.77646208	22.09547302	NA	NA	NA	MW	0	NA	NA	0	792	Turkey	01/08/1993	31/10/1993	1993.58	1993.83	1993 DHS	DHS	0	0.205265317	0.166871864	0.173818808	0.011765671	0.013130867	0.011588562
1	1758	15-19	NA	NA	NA	NA	20.02310078	15.76210318	4.260997598	16.85283414	NA	NA	NA	MW	0	NA	NA	0	508	Mozambique	01/08/2003	31/01/2004	2003.58	2004.08	2003 DHS	DHS	1	0.109815672	0.266916909	0.106645584	0.010645638	0.009880986	0.009194415
1	1759	15-19	NA	NA	NA	NA	55.22523979	52.99007662	2.23516317	19.92772005	NA	NA	NA	MW	0	NA	NA	0	558	Nicaragua	01/09/2001	31/12/2001	2001.67	2002	2001 DHS	DHS	0	0.089350497	0.347560391	0.119091788	0.007030022	0.001817444	0.004449967
1	1761	15-19	NA	NA	NA	NA	7.862653606	3.410767769	4.451885837	27.87246807	NA	NA	NA	MW	0	NA	NA	0	204	Benin	01/08/2001	30/11/2001	2001.58	2001.91	2001 DHS	DHS	0	0.366084078	0.314813617	0.1301903	0.006543478	0.004819357	0.010141183
1	1762	15-19	NA	NA	NA	NA	2.320218537	1.470708969	0.849509568	19.02556525	NA	NA	NA	MW	0	NA	NA	0	148	Chad	23/07/2004	10/12/2004	2004.56	2004.94	2004 DHS	DHS	0	0.306178085	0.501999329	0.158544231	0.004134454	0.003365297	0.010968022
1	1763	15-19	NA	NA	NA	NA	5.376344086	2.508960573	2.867383513	NA	NA	NA	NA	MW	0	NA	NA	0	320	Guatemala	01/09/1987	31/12/1987	1987.67	1988	1987 DHS	DHS	0	NA	NA	NA	NA	NA	NA
1	1764	15-19	NA	NA	NA	NA	10.71575095	7.671176687	3.044574261	61.55832991	NA	NA	NA	MW	0	NA	NA	0	332	Haiti	01/07/1994	31/01/1995	1994.5	1995.08	1994-1995 DHS	DHS	0	0.294149769	0.393420907	0.144529208	0.011531297	0.009349461	0.015419038
1	1765	15-19	NA	NA	NA	NA	16.42720312	9.202382141	7.224820984	58.21867736	NA	NA	NA	MW	0	NA	NA	0	332	Haiti	01/02/2000	31/07/2000	2000.08	2000.58	2000 DHS	DHS	0	0.246328684	0.29153246	0.263697603	0.020030635	0.019067007	0.045702254
1	1766	15-19	NA	NA	NA	NA	30.72958909	9.785359241	20.94422985	34.04832742	NA	NA	NA	MW	0	NA	NA	0	68	Bolivia (Plurinational State of)	01/03/1998	30/09/1998	1998.16	1998.75	1998 DHS	DHS	0	0.23878915	0.165925215	0.161541318	0.009373645	0.020062132	0.025994808
1	1767	15-19	NA	NA	NA	NA	0.645949308	0.575477888	0.0705	24.03118208	NA	NA	NA	MW	0	NA	NA	0	508	Mozambique	01/03/1997	31/07/1997	1997.16	1997.58	1997 DHS	DHS	0	0.379309118	1.010396681	0.141501344	5.73E-04	1.44E-04	0.008715295
1	1768	15-19	NA	NA	NA	NA	16.03128664	2.469392648	13.56189399	NA	NA	NA	NA	MW	0	NA	NA	0	68	Bolivia (Plurinational State of)	01/03/1989	31/07/1989	1989.16	1989.58	1989 DHS	DHS	0	NA	NA	NA	NA	NA	NA
1	1769	15-19	NA	NA	NA	NA	30.18579931	9.423177793	20.76262151	35.11694593	NA	NA	NA	MW	0	NA	NA	0	68	Bolivia (Plurinational State of)	01/11/1993	31/05/1994	1993.83	1994.41	1994 DHS	DHS	0	0.247063233	0.180588509	0.157566172	0.004957028	0.004658451	0.011654026
1	1770	15-19	NA	NA	NA	NA	12.05700929	10.19773393	1.859275362	31.99826678	NA	NA	NA	MW	0	NA	NA	0	320	Guatemala	01/06/1995	31/12/1995	1995.41	1996	1995 DHS	DHS	0	0.233995635	0.449927432	0.106676996	0.020922084	0.007578189	0.018023508
1	1771	15-19	NA	NA	NA	NA	22.65625	10.15625	12.5	NA	NA	NA	NA	MW	0	NA	NA	0	604	Peru	01/09/1986	31/12/1986	1986.67	1987	1986 DHS	DHS	0	NA	NA	NA	NA	NA	NA
1	1772	15-19	NA	NA	NA	NA	29.07229828	10.87352735	18.19877092	42.7443749	NA	NA	NA	MW	0	NA	NA	0	604	Peru	01/10/1991	31/03/1992	1991.75	1992.25	1991-1992 DHS	DHS	0	0.190350568	0.138810074	0.127786027	0.006690602	0.007435996	0.009705437
1	1773	15-19	NA	NA	NA	NA	45.97658241	30.97546285	15.00111955	30.56954505	NA	NA	NA	MW	0	NA	NA	0	604	Peru	01/08/1996	30/11/1996	1996.58	1996.91	1996 DHS	DHS	0	0.10321984	0.123070505	0.106151698	0.004775629	0.00444321	0.004117933
1	1774	15-19	NA	NA	NA	NA	51.63748317	40.08100052	11.55648265	28.31457711	NA	NA	NA	MW	0	NA	NA	0	604	Peru	01/07/2000	30/11/2000	2000.5	2000.91	2000 DHS	DHS	0	0.097939702	0.152016377	0.144032217	0.005299291	0.002494647	0.003962364
1	1775	15-19	NA	NA	NA	NA	39.79350022	38.15940882	1.634091394	28.4145923	NA	NA	NA	MW	0	NA	NA	0	558	Nicaragua	01/12/1997	31/05/1998	1997.92	1998.41	1998 DHS	DHS	0	0.097921646	0.308285112	0.093171896	0.01883157	0.001687429	0.013111519
1	1776	15-19	NA	NA	NA	NA	13.87675179	2.239770712	11.63698108	24.6882582	NA	NA	NA	MW	0	NA	NA	0	854	Burkina Faso	01/12/1992	31/03/1993	1992.92	1993.24	1993 DHS	DHS	0	0.250785474	0.143013858	0.124933142	0.004076589	0.013095528	0.021705467
1	1777	15-19	NA	NA	NA	NA	7.825566422	3.522520703	4.303045719	22.97710884	NA	NA	NA	MW	0	NA	NA	0	854	Burkina Faso	01/11/1998	31/03/1999	1998.83	1999.24	1998-1999 DHS	DHS	0	0.255067266	0.244348095	0.117651213	0.006857779	0.006788204	0.018919154
1	1778	15-19	NA	NA	NA	NA	10.72437727	4.347581101	6.376796168	24.0016357	NA	NA	NA	MW	0	NA	NA	0	384	CÃ´te d'Ivoire	01/09/1998	31/03/1999	1998.67	1999.24	1998-1999 DHS	DHS	0	0.358840728	0.418971875	0.219088199	0.00568969	0.005525976	0.01031326
1	1779	15-19	NA	NA	NA	NA	8.673116703	2.387914524	6.285202179	27.42615281	NA	NA	NA	MW	0	NA	NA	0	384	CÃ´te d'Ivoire	01/06/1994	30/11/1994	1994.41	1994.91	1994 DHS	DHS	0	0.307126141	0.174659541	0.12093653	0.006436885	0.006818286	0.012983479
1	1780	15-19	NA	NA	NA	NA	9.356411419	2.467185481	6.889225938	28.58368229	NA	NA	NA	MW	0	NA	NA	0	204	Benin	01/06/1996	31/08/1996	1996.42	1996.66	1996 DHS	DHS	0	0.415321312	0.235658543	0.1337996	0.001835022	0.011905049	0.018263625
1	1781	15-19	NA	NA	NA	NA	15.77595815	14.99744631	0.778511846	13.46505927	NA	NA	NA	MW	0	NA	NA	0	860	Uzbekistan	01/06/1996	31/10/1996	1996.42	1996.83	1996 DHS	DHS	0	0.286373041	0.692902365	0.328713787	0.013951261	8.76E-04	0.005758971
1	1782	15-19	NA	NA	NA	NA	29.29707305	20.54629005	8.750782993	11.10855902	NA	NA	NA	MW	0	NA	NA	0	417	Kyrgyzstan	01/08/1997	30/11/1997	1997.58	1997.91	1997 DHS	DHS	0	0.328438781	0.396922642	0.339765513	0.026810776	0.008698409	0.012590855
1	1783	15-19	NA	NA	NA	NA	43.02969435	40.4639993	2.565695048	NA	NA	NA	NA	MW	0	NA	NA	0	764	Thailand	01/03/1987	30/06/1987	1987.16	1987.49	1987 DHS	DHS	0	NA	NA	NA	NA	NA	NA
1	1784	15-19	NA	NA	NA	NA	8.415637754	1.388124933	7.027512821	NA	NA	NA	NA	MW	0	NA	NA	0	466	Mali	01/03/1987	31/08/1987	1987.16	1987.66	1987 DHS	DHS	0	NA	NA	NA	NA	NA	NA
1	1785	15-19	NA	NA	NA	NA	28.5260219	20.19683909	8.329182805	52.13354057	NA	NA	NA	MW	0	NA	NA	0	332	Haiti	01/10/2005	30/06/2006	2005.75	2006.49	2005-2006 DHS	DHS	0	0.154777332	0.22185898	0.173822549	0.024842802	0.016872844	0.031047869
1	1786	15-19	NA	NA	NA	NA	23.63471846	14.83322505	8.801493413	18.51557864	NA	NA	NA	MW	0	NA	NA	0	120	Cameroon	01/02/2004	31/08/2004	2004.08	2004.66	2004 DHS	DHS	0	0.131482558	0.119490797	0.09977377	0.008613785	0.005106586	0.006168554
1	1787	15-19	NA	NA	NA	NA	6.761847481	4.401360733	2.360486748	19.92353529	NA	NA	NA	MW	0	NA	NA	0	854	Burkina Faso	01/06/2003	30/11/2003	2003.41	2003.91	2003 DHS	DHS	0	0.193217499	0.314060673	0.110836094	0.0024377	0.003918701	0.006928382
1	1788	15-19	NA	NA	NA	NA	45.91057328	39.94304734	5.967525939	25.77211012	NA	NA	NA	MW	0	NA	NA	0	340	Honduras	01/10/2005	31/05/2006	2005.75	2006.41	2005-2006 DHS	DHS	0	0.073667131	0.162143306	0.109029694	0.006103761	0.002368373	0.00548773
1	1789	15-19	NA	NA	NA	NA	7.117522813	4.01241768	3.105105134	33.8344642	NA	NA	NA	MW	0	NA	NA	0	356	India	01/04/1992	30/09/1993	1992.25	1993.75	1992-1993 NFHS	DHS	0	0.071646071	0.083882861	0.031015542	0.002760967	0.002525007	0.006811063
1	1790	15-19	NA	NA	NA	NA	8.055752769	4.71565451	3.340098258	27.32382057	NA	NA	NA	MW	0	NA	NA	0	356	India	01/11/1998	31/12/1999	1998.83	2000	1998-1999 NFHS	DHS	0	0.068161987	0.094220471	0.035143622	0.00304358	0.003042647	0.006763582
1	1791	15-19	NA	NA	NA	NA	10.6	6.4	4.2	25	NA	NA	NA	MW	0	NA	NA	0	356	India	NA	NA	2002.25	2002.75	2002-2004 DLHS	National survey	0	NA	NA	NA	NA	NA	NA
1	1792	15-19	NA	NA	NA	NA	12.98047446	6.940310376	6.040164082	27.10704065	NA	NA	NA	MW	0	NA	NA	0	356	India	01/11/2005	31/08/2006	2005.83	2006.66	2005-2006 NFHS	DHS	0	NA	NA	NA	NA	NA	NA
1	1793	15-19	NA	NA	NA	NA	26.6	20.9	5.6	NA	NA	NA	NA	MW	0	NA	NA	0	795	Turkmenistan	01/07/2000	31/10/2000	2000.5	2000.83	2000 DHS	DHS	0	NA	NA	NA	NA	NA	NA
1	1794	15-19	NA	NA	NA	NA	9.535452323	0.488997555	9.046454768	NA	NA	NA	NA	MW	0	NA	NA	0	686	Senegal	01/04/1986	31/07/1986	1986.25	1986.58	1986 DHS	DHS	0	NA	NA	NA	NA	NA	NA
1	1795	15-19	NA	NA	NA	NA	5.517900352	1.532175278	3.985725074	31.83608306	NA	NA	NA	MW	0	NA	NA	0	686	Senegal	01/01/1997	30/04/1997	1997	1997.33	1997 DHS	DHS	0	0.429811499	0.257276236	0.09882299	0.004540887	0.003345948	0.014099035
1	1796	15-19	NA	NA	NA	NA	17.02898551	14.49275362	2.536231884	NA	NA	NA	NA	MW	0	NA	NA	0	504	Morocco	01/05/1987	31/07/1987	1987.33	1987.58	1987 DHS	DHS	0	NA	NA	NA	NA	NA	NA
1	1797	15-19	NA	NA	NA	NA	23.3201581	22.13438735	1.185770751	19.76284585	NA	NA	NA	MW	0	NA	NA	0	504	Morocco	01/01/1992	30/04/1992	1992	1992.33	1992 DHS	DHS	0	0.170585687	0.594582685	0.172360218	0.029358822	0.006957314	0.026229305
1	1798	15-19	NA	NA	NA	NA	18.36270944	1.479095607	16.88361383	21.34014874	NA	NA	NA	MW	0	NA	NA	0	120	Cameroon	01/04/1991	30/09/1991	1991.25	1991.75	1991 DHS	DHS	0	0.525317678	0.194541616	0.148363105	0.007429857	0.025284258	0.02091154
1	1799	15-19	NA	NA	NA	NA	20.45478329	16.54553174	3.909251548	33.30940532	NA	NA	NA	MW	0	NA	NA	0	516	Namibia	01/07/1992	30/11/1992	1992.5	1992.91	1992 DHS	DHS	0	0.336147744	0.589346863	0.217311201	0.01502907	0.003550954	0.015299325
1	1800	15-19	NA	NA	NA	NA	11.98418376	9.268892721	2.715291041	35.10862486	NA	NA	NA	MW	0	NA	NA	0	524	Nepal	01/01/2001	30/06/2001	2001	2001.49	2001 DHS	DHS	0	0.112498122	0.220541929	0.096459454	0.006663465	0.003957811	0.012085967
1	1801	15-19	NA	NA	NA	NA	6.521357366	4.367858092	2.153499274	42.42414287	NA	NA	NA	MW	0	NA	NA	0	524	Nepal	01/01/1996	30/06/1996	1996	1996.49	1996 DHS	DHS	0	0.166492441	0.262357785	0.07099872	0.006921313	0.00550658	0.016768844
1	1802	15-19	NA	NA	NA	NA	2.045372926			NA	NA	NA	NA	MW	0	NA	NA	0	430	Liberia	01/02/1986	31/07/1986	1986.08	1986.58	1986 DHS	DHS	0	NA	NA	NA	NA	NA	NA
1	1803	15-19	NA	NA	NA	NA	17.2	14.5	2.7	NA	NA	NA	NA	MW	0	NA	NA	0	72	Botswana	01/08/1988	31/12/1988	1988.58	1989	1988 DHS	DHS	0	NA	NA	NA	NA	NA	NA
1	1804	15-19	NA	NA	NA	NA	1.701583095	1.17882693	0.522756165	NA	NA	NA	NA	MW	0	NA	NA	0	800	Uganda	01/09/1988	28/02/1989	1988.67	1989.16	1988-1989 DHS	DHS	0	NA	NA	NA	NA	NA	NA
1	1806	15-19	NA	NA	NA	NA	26.31604506	24.07850216	2.237542897	7.165988495	NA	NA	NA	MW	0	NA	NA	0	818	Egypt	01/04/2005	30/06/2005	2005.25	2005.49	2005 DHS	DHS	0	0.104493318	0.302165165	0.156778023	0.009485883	0.002403272	0.004073929
1	1807	15-19	NA	NA	NA	NA	45.22218645	40.38332476	4.838861692	30.83496209	NA	NA	NA	MW	0	NA	NA	0	516	Namibia	01/09/2000	31/12/2000	2000.67	2001	2000 DHS	DHS	0	0.282372939	0.682144863	0.274690977	0.018156904	0.003507869	0.016350665
1	1808	15-19	NA	NA	NA	NA	14.72086575			34.708087	NA	NA	NA	MW	0	NA	NA	0	426	Lesotho	01/09/2004	31/01/2005	2004.67	2005.08	2004 DHS	DHS	0	0.177459408	NaN	0.147066282	0.013624504	0	0.020303333
1	1809	15-19	NA	Traditional methods include folk methods.	NA	NA	26.8	22.4	4.5	NA	NA	NA	NA	MW	0	NA	Including folk methods.	0	860	Uzbekistan	01/09/2002	31/12/2002	2002.67	2003	2002 DHS Special	National survey	0	NA	NA	NA	NA	NA	NA
1	1812	15-19	NA	NA	NA	NA	20.82932325	13.71985661	7.109466635	25.72588112	NA	NA	NA	MW	0	NA	NA	0	116	Cambodia	01/09/2005	31/03/2006	2005.67	2006.24	2005 DHS	DHS	0	0.183414773	0.267756857	0.154788674	0.021277972	0.017368662	0.02905003
1	1813	15-19	NA	NA	NA	NA	42.18288218	34.1019057	8.080976481	19.29707648	NA	NA	NA	MW	0	NA	NA	0	50	Bangladesh	01/01/2004	31/05/2004	2004	2004.41	2004 DHS	DHS	0	0.058147449	0.106671313	0.081332784	0.012879981	0.007803055	0.011412601
1	1814	15-19	NA	NA	NA	NA	24.73133039	19.63344633	5.097884065	23.69419958	NA	NA	NA	MW	0	NA	NA	0	50	Bangladesh	01/11/1993	31/03/1994	1993.83	1994.24	1993-1994 DHS	DHS	0	0.07715159	0.136455955	0.067517268	0.010620639	0.005962214	0.009779142
1	1815	15-19	NA	NA	NA	NA	32.85955339	27.81961786	5.039935531	22.67484165	NA	NA	NA	MW	0	NA	NA	0	50	Bangladesh	01/11/1996	31/03/1997	1996.83	1997.24	1996-1997 DHS	DHS	0	0.070654185	0.143914887	0.08498319	0.013514472	0.006446102	0.012935564
1	1816	15-19	NA	NA	NA	NA	38.09857869	31.19819719	6.900381498	21.97357681	NA	NA	NA	MW	0	NA	NA	0	50	Bangladesh	01/11/1999	31/03/2000	1999.83	2000.25	1999-2000 DHS	DHS	0	0.06891351	0.114636481	0.076557932	0.012878049	0.00617027	0.009836279
1	1820	15-19	NA	NA	NA	NA	58.36359707	33.86307515	24.50052192	14.15507941	NA	NA	NA	MW	0	NA	NA	0	498	Republic of Moldova	01/06/2005	31/08/2005	2005.41	2005.66	2005 DHS	DHS	0	0.202567238	0.238377866	0.282944303	0.014367849	0.010135544	0.010792258
1	1821	15-19	NA	NA	NA	NA	18.11445799	14.89283429	3.221623706	9.732372787	NA	NA	NA	MW	0	NA	NA	0	704	Viet Nam	01/07/1997	31/10/1997	1997.5	1997.83	1997 DHS	DHS	0	0.273295563	0.532102034	0.38204272	0.03462263	0.016584718	0.032996946
1	1822	15-19	NA	NA	NA	NA	13.02941034	6.685626809	6.343783536	NA	NA	NA	NA	MW	0	NA	NA	0	404	Kenya	01/12/1988	31/05/1989	1988.92	1989.41	1989 DHS	DHS	0	NA	NA	NA	NA	NA	NA
1	1823	15-19	NA	NA	NA	NA	10.2501383	6.123211373	4.126926929	39.66546517	NA	NA	NA	MW	0	NA	NA	0	404	Kenya	01/02/1993	31/08/1993	1993.08	1993.66	1993 DHS	DHS	0	0.292202021	0.359843692	0.13988783	0.013990503	0.012780435	0.016631012
1	1824	15-19	NA	NA	NA	NA	18.04970918	10.13688413	7.912825049	29.95212055	NA	NA	NA	MW	0	NA	NA	0	404	Kenya	01/02/1998	31/07/1998	1998.08	1998.58	1998 DHS	DHS	0	0.211354863	0.251798645	0.15206625	0.010608357	0.004375267	0.012669803
1	1825	15-19	NA	NA	NA	NA	8.946368195	7.048578846	1.89778935	37.22388536	NA	NA	NA	MW	0	NA	NA	0	116	Cambodia	01/02/2000	31/07/2000	2000.08	2000.58	2000 DHS	DHS	0	0.209201606	0.44831201	0.113143456	0.013709185	0.008346434	0.025540261
1	1826	15-19	NA	NA	NA	NA	31.49029605	14.38894445	17.10135159	21.90450743	NA	NA	NA	MW	0	NA	NA	0	398	Kazakhstan	01/05/1995	30/09/1995	1995.33	1995.75	1995 DHS	DHS	0	0.367512387	0.466384414	0.363498055	0.02227029	0.035922038	0.007080771
1	1827	15-19	NA	NA	NA	NA	2.553199277	1.902385918	0.650813359	28.32019197	NA	NA	NA	MW	0	NA	NA	0	586	Pakistan	01/12/1990	31/05/1991	1990.92	1991.41	1990-1991 DHS	DHS	0	0.377851949	0.554495277	0.158255102	0.005507715	0.001893005	0.006450645
1	1828	15-19	NA	NA	NA	NA	4.153086567	1.244636221	2.908450346	17.32517955	NA	NA	NA	MW	0	NA	NA	0	566	Nigeria	01/03/1999	31/05/1999	1999.16	1999.41	1999 DHS	DHS	0	0.405212955	0.25999605	0.11150492	0.003724831	0.006560356	0.016501083
1	1829	15-19	NA	NA	NA	NA	16.105336	15.84624665	0.259089356	17.20124119	NA	NA	NA	MW	0	NA	NA	0	818	Egypt	01/11/1995	31/01/1996	1995.83	1996.08	1995 DHS	DHS	0	0.134431996	0.846058818	0.121465028	0.011574389	0.001279808	0.008649871
1	1830	15-19	NA	NA	NA	NA	23.40623418	22.00277236	1.403461815	10.27247837	NA	NA	NA	MW	0	NA	NA	0	818	Egypt	01/02/2000	30/04/2000	2000.08	2000.33	2000 DHS	DHS	0	0.115238889	0.37315417	0.148677807	0.007737778	0.001722242	0.005777883
1	1831	15-19	NA	NA	NA	NA	5.512993441	5.458718379	0.0543	NA	NA	NA	NA	MW	0	NA	NA	0	818	Egypt	01/10/1988	31/01/1989	1988.75	1989.08	1988 DHS	DHS	0	NA	NA	NA	NA	NA	NA
1	1832	15-19	NA	NA	NA	NA	13.25131712	12.68591211	0.565405012	24.80071819	NA	NA	NA	MW	0	NA	NA	0	818	Egypt	01/11/1992	28/02/1993	1992.83	1993.16	1992 DHS	DHS	0	0.16208188	0.644984165	0.114074984	0.010263349	0.003379487	0.010625151
1	1833	15-19	NA	NA	NA	NA	15.16388585	12.9137642	2.250121647	29.32044455	NA	NA	NA	MW	0	NA	NA	0	454	Malawi	01/07/2000	30/11/2000	2000.5	2000.91	2000 DHS	DHS	0	0.120522718	0.243202405	0.087339423	0.003180862	0.001874514	0.003372152
1	1834	15-19	NA	NA	NA	NA	7.27672727	3.376013021	3.900714249	34.21554502	NA	NA	NA	MW	0	NA	NA	0	454	Malawi	01/09/1992	30/11/1992	1992.67	1992.91	1992 DHS	DHS	0	0.299963164	0.289786696	0.120871595	0.007975071	0.008601907	0.019033107
1	1835	15-19	NA	NA	NA	NA	3.297439009	0.64391245	2.653526559	35.89593552	NA	NA	NA	MW	0	NA	NA	0	232	Eritrea	01/09/1995	31/01/1996	1995.67	1996.08	1995 DHS	DHS	0	NA	NA	NA	NA	NA	NA
1	1836	15-19	NA	NA	NA	NA	17.18766131	9.631803748	7.55585756	32.81271088	NA	NA	NA	MW	0	NA	NA	0	608	Philippines	01/03/1993	31/05/1993	1993.16	1993.41	1993 DHS	DHS	0	0.228818067	0.256172165	0.153610217	0.011912445	0.009376998	0.015861057
1	1837	15-19	NA	NA	NA	NA	21.8103674	11.37281702	10.43755039	31.3981282	NA	NA	NA	MW	0	NA	NA	0	608	Philippines	01/02/1998	30/04/1998	1998.08	1998.33	1998 DHS	DHS	0	0.219697608	0.223593563	0.169077078	0.008636226	0.004268606	0.015355521
1	1838	15-19	NA	NA	NA	NA	9.557691863	6.878955853	2.67873601	18.97636122	NA	NA	NA	MW	0	NA	NA	0	834	United Republic of Tanzania	01/10/2004	28/02/2005	2004.75	2005.16	2004-2005 DHS	DHS	0	0.197578482	0.337095952	0.124333257	0.012653593	0.008784988	0.019076098
1	1840	15-19	NA	NA	NA	NA	41.81093949	37.55428866	4.256650825	19.51682454	NA	NA	NA	MW	0	NA	NA	0	50	Bangladesh	01/03/2007	31/08/2007	2007.16	2007.66	2007 DHS	DHS	0	0.076357992	0.147608968	0.094241226	0.015295464	0.005317217	0.012453809
1	1841	15-19	NA	NA	NA	NA	6.2	2.4	3.9	23	NA	NA	NA	MW	0	NA	NA	0	586	Pakistan	NA	NA	1996.25	1996.75	1996-1997 FFPS	National survey	0	NA	NA	NA	NA	NA	NA
1	1842	15-19	NA	NA	NA	NA	4.81	2.04	2.77	NA	NA	NA	NA	MW	0	NA	NA	0	586	Pakistan	01/10/2000	01/01/2001	2000.75	2001	2000-2001 RHFPS	National survey	0	NA	NA	NA	NA	NA	NA
1	1843	15-19	NA	NA	NA	NA	16.48363494	4.480721922	12.00291302	15.66007427	NA	NA	NA	MW	0	NA	NA	0	51	Armenia	01/09/2005	31/12/2005	2005.67	2006	2005 DHS	DHS	0	0.741422412	0.468382102	0.374866908	0.034697717	0.024383211	0.030615138
1	1844	15-19	NA	NA	NA	NA	45.56304206	26.2964729	19.26656916	33.16800806	NA	NA	NA	MW	0	NA	NA	0	68	Bolivia (Plurinational State of)	01/08/2003	31/01/2004	2003.58	2004.08	2003 DHS	DHS	0	0.135864395	0.16847167	0.189067994	0.026308801	0.025973386	0.02841986
1	1845	15-19	NA	NA	NA	NA	24.0385143	22.83724624	1.201268067	NA	NA	NA	NA	MW	0	NA	NA	1	454	Malawi	15/07/2006	15/11/2006	2006.53	2006.87	2006 MICS	MICS	0	NA	NA	NA	NA	NA	NA
1	1848	15-19	NA	NA	NA	NA	25.5147445	18.03739239	7.477352107	23.74302393	NA	NA	NA	MW	0	NA	NA	0	51	Armenia	01/10/2000	31/12/2000	2000.75	2001	2000 DHS	DHS	1	0.221771911	0.314263401	0.268994164	0.029346453	0.010982291	0.035135258
1	1849	15-19	NA	NA	NA	NA	2.353206416	1.662307551	0.690898866	43.56801829	NA	NA	NA	MW	0	NA	NA	0	232	Eritrea	01/03/2002	31/07/2002	2002.16	2002.58	2002 DHS	DHS	0	NA	NA	NA	NA	NA	NA
1	1850	15-19	NA	NA	NA	NA	25.57883776	13.23241652	12.34642124	31.92201814	NA	NA	NA	MW	0	NA	NA	0	608	Philippines	01/06/2003	30/09/2003	2003.41	2003.75	2003 DHS	DHS	0	0.208314071	0.20634026	0.153345916	0.013279501	0.00663288	0.009973253
1	1851	15-19	NA	NA	NA	NA	15.95183504	13.80895877	2.142876265	37.84306999	NA	NA	NA	MW	0	NA	NA	0	524	Nepal	01/02/2006	31/08/2006	2006.08	2006.66	2006 DHS	DHS	0	0.123120342	0.318951571	0.098825409	0.008753074	0.002963093	0.013840591
1	1852	15-19	NA	NA	NA	NA	11.11111111	9.523809524	1.587301587	NA	NA	NA	NA	MW	0	NA	NA	0	788	Tunisia	01/06/1988	31/10/1988	1988.42	1988.83	1988 DHS	DHS	0	NA	NA	NA	NA	NA	NA
1	1853	15-19	NA	NA	NA	NA	5.251556403	3.539836456	1.711719947	35.52937339	NA	NA	NA	MW	0	NA	NA	0	478	Mauritania	01/08/2000	30/04/2001	2000.58	2001.33	2000-2001 DHS	DHS	0	0.284735466	0.479619366	0.139068042	0.009255993	0.005915536	0.019707824
1	1854	15-19	NA	NA	NA	NA	10.78689509	7.073355152	3.713539941	28.71353994	NA	NA	NA	MW	0	NA	NA	0	646	Rwanda	01/06/1992	31/10/1992	1992.42	1992.83	1992 DHS	DHS	0	0.363960814	0.515968661	0.210796802	0.013940598	0.012910698	0.027774697
1	1855	15-19	NA	NA	NA	NA	4.992757912	1.50074305	3.492014862	22.41555508	NA	NA	NA	MW	0	NA	NA	0	646	Rwanda	01/06/2000	31/08/2000	2000.42	2000.66	2000 DHS	DHS	0	0.476782373	0.447330054	0.195397486	0.005431493	0.004679748	0.009583253
1	1858	15-19	NA	NA	NA	NA	8.912526681	8.583485328	0.329041353	37.76745219	NA	NA	NA	MW	0	NA	NA	0	231	Ethiopia	01/04/2005	31/08/2005	2005.25	2005.66	2005 DHS	DHS	0	0.179690181	0.943435663	0.12683875	0.007258153	0.003075788	0.014524718
1	1859	15-19	NA	NA	NA	NA	57.1663899	47.14234538	10.02404452	21.02924862	NA	NA	NA	MW	0	NA	NA	0	170	Colombia	01/10/2004	30/06/2005	2004.75	2005.49	2005 DHS	DHS	0	0.089749221	0.146242055	0.123070151	0.005047499	0.002584474	0.003692967
1	1860	15-19	NA	NA	NA	NA	36.86045762	31.85888074	5.001576881	25.80136505	NA	NA	NA	MW	0	NA	NA	0	170	Colombia	01/05/1990	31/08/1990	1990.33	1990.66	1990 DHS	DHS	0	0.19405606	0.371464831	0.280479946	0.015172918	0.014145333	0.01623794
1	1861	15-19	NA	NA	NA	NA	57.19228305	45.03081606	12.16146699	24.21998568	NA	NA	NA	MW	0	NA	NA	0	170	Colombia	01/02/2000	30/06/2000	2000.08	2000.49	2000 DHS	DHS	0	0.12024129	0.167844176	0.165719012	0.009283879	0.006669832	0.010446903
1	1862	15-19	NA	NA	NA	NA	50.72969154	36.72123921	14.00845233	21.64511099	NA	NA	NA	MW	0	NA	NA	0	170	Colombia	01/03/1995	30/06/1995	1995.16	1995.49	1995 DHS	DHS	0	0.12715097	0.183044581	0.158818224	0.010773377	0.009401689	0.009598179
1	1863	15-19	NA	NA	NA	NA	23.2	20.7	2.5	NA	NA	NA	NA	MW	0	NA	NA	0	558	Nicaragua	03/11/1992	13/02/1993	1992.84	1993.12	1992-1993 ESF-RHS	RHS	0	NA	NA	NA	NA	NA	NA
1	1866	15-19	NA	NA	NA	NA	38.37102093	35.85719283	2.513828103	10.33137152	NA	NA	NA	MW	0	NA	NA	0	504	Morocco	01/10/2003	29/02/2004	2003.75	2004.16	2003-2004 DHS	DHS	0	0.126567538	0.354361938	0.191544069	0.009595695	0.002978885	0.008986142
1	1867	15-19	NA	Traditional methods include folk methods.	NA	NA	3.1	1.8	1.3	NA	NA	NA	NA	MW	0	NA	Including folk methods.	0	686	Senegal	01/10/1999	31/12/1999	1999.75	2000	1999 DHS	DHS	0	NA	NA	NA	NA	NA	NA
1	1868	15-19	NA	NA	NA	NA	54.05469498	47.17055991	6.884135075	25.52405394	NA	NA	NA	MW	0	NA	NA	0	76	Brazil	01/03/1996	30/06/1996	1996.16	1996.49	1996 DHS	DHS	0	0.116284609	0.246932848	0.161973924	0.013150953	0.0076264	0.010441602
1	1869	15-19	NA	NA	NA	NA	47.77706734	44.13999973	3.637067609	NA	NA	NA	NA	MW	0	NA	NA	0	76	Brazil	01/05/1986	31/08/1986	1986.33	1986.66	1986 FP-MCH DHS	DHS	0	NA	NA	NA	NA	NA	NA
1	1878	15-19	NA	NA	NA	Data pertain to non-pregnant women.	35.63218391	26.43678161	9.195402299	NA	NA	+	NA	MW	0	NA	NA	0	364	Iran (Islamic Republic of)	01/07/2002	31/12/2002	2002.5	2003	2002 SCIH	National survey	0	NA	NA	NA	NA	NA	NA
1	1882	15-19	NA	NA	NA	NA	31.73538969	30.79605769	0.939332008	NA	NA	NA	NA	MW	0	NA	NA	1	398	Kazakhstan	01/01/2006	31/03/2006	2006	2006.24	2006 MICS	MICS	0	NA	NA	NA	NA	NA	NA
1	1884	15-19	NA	NA	NA	NA	4.319755592	3.848435745	0.471319847	14.81002699	NA	NA	NA	MW	0	NA	NA	0	566	Nigeria	01/03/2003	31/08/2003	2003.16	2003.66	2003 DHS	DHS	0	0.38893437	0.47017359	0.177741219	0.002701963	5.85E-04	0.006403272
1	1885	15-19	NA	NA	NA	NA	18.9339886	16.61257927	2.321409331	26.96981582	NA	NA	NA	MW	0	NA	NA	0	454	Malawi	01/10/2004	31/01/2005	2004.75	2005.08	2004 DHS	DHS	0	0.11050272	0.266123102	0.100790382	0.015313437	0.006037529	0.018699877
1	1886	15-19	NA	NA	NA	NA	11.98824465	8.980865054	3.007379598	25.74880261	NA	NA	NA	MW	0	NA	NA	0	800	Uganda	01/09/2000	31/03/2001	2000.67	2001.24	2000-2001 DHS	DHS	0	0.193491769	0.290952353	0.119085635	0.015775888	0.008462923	0.02251076
1	1887	15-19	NA	NA	NA	NA	11.38733264	8.275402784	3.111929856	34.3979502	NA	NA	NA	MW	0	NA	NA	0	800	Uganda	01/05/2006	31/10/2006	2006.33	2006.83	2006 DHS	DHS	0	0.21957788	0.308077473	0.119140705	0.00819222	0.002082124	0.010736502
1	1888	15-19	NA	NA	NA	NA	14.53154636	4.406828616	10.12471775	28.88061232	NA	NA	NA	MW	0	NA	NA	0	180	Dem. Rep. of the Congo	01/01/2007	31/08/2007	2007	2007.66	2007 DHS	DHS	0	0.287392191	0.248422903	0.181903463	0.011831461	0.022265789	0.035547316
1	1891	15-19	NA	NA	NA	NA	10.20555969	NA	NA	NA	NA	NA	NA	MW	0	NA	NA	1	450	Madagascar	04/08/2000	11/10/2000	2000.59	2000.78	2000 MICS	MICS	0	NA	NA	NA	NA	NA	NA
1	1893	15-19	NA	NA	NA	NA	19.70868691			NA	NA	NA	NA	MW	0	NA	NA	1	328	Guyana	31/03/2006	15/01/2007	2006.24	2007.04	2006 MICS	MICS	0	NA	NA	NA	NA	NA	NA
1	1895	15-19	NA	NA	NA	NA	4.924067222	2.049721269	2.874345953	NA	NA	NA	NA	MW	0	NA	NA	1	624	Guinea-Bissau	10/04/2000	25/05/2000	2000.27	2000.4	2000 MICS	MICS	0	NA	NA	NA	NA	NA	NA
1	1896	15-19	NA	NA	NA	NA	6.203203027	5.534839053	0.668363974	NA	NA	NA	NA	MW	0	NA	NA	1	148	Chad	17/05/2000	15/09/2000	2000.37	2000.7	2000 MICS	MICS	0	0.323351053	0.65912874	NaN	0.01572362	0.004365622	0
1	1897	15-19	NA	NA	NA	NA	3.3	0.4719	2.8281	NA	NA	NA	NA	MW	0	NA	NA	1	706	Somalia	NA	NA	1999.25	1999.75	1999 MICS	MICS	0	NA	NA	NA	NA	NA	NA
1	1899	15-19	NA	NA	NA	NA	22.34118734			NA	NA	NA	NA	MW	0	NA	NA	1	678	Sao Tome and Principe	01/08/2000	30/09/2000	2000.58	2000.75	2000 MICS	MICS	0	NA	NA	NA	NA	NA	NA
1	1900	15-19	NA	NA	NA	NA	17.0723553	14.68726292	2.385092382	NA	NA	NA	NA	MW	0	NA	NA	1	268	Georgia	01/11/2005	31/12/2005	2005.83	2006	2005 MICS	MICS	0	NA	NA	NA	NA	NA	NA
1	1904	15-19	NA	NA	NA	NA	41.57924333	41.02010163	0.559141703	NA	NA	NA	NA	MW	0	NA	NA	1	804	Ukraine	02/11/2005	27/12/2005	2005.84	2005.99	2005 MICS	MICS	0	NA	NA	NA	NA	NA	NA
1	1905	15-19	NA	NA	NA	NA	5.982905983	2.564102564	3.418803419	NA	NA	NA	NA	MW	0	NA	NA	1	108	Burundi	17/04/2000	21/05/2000	2000.29	2000.39	2000 MICS	MICS	0	NA	NA	NA	NA	NA	NA
1	1907	15-19	NA	NA	NA	NA	1.567730539			NA	NA	NA	NA	MW	0	NA	NA	1	270	Gambia	01/05/2000	30/06/2000	2000.33	2000.49	2000 MICS	MICS	0	NA	NA	NA	NA	NA	NA
1	1910	15-19	NA	NA	NA	NA	35.9901801			NA	NA	NA	NA	MW	0	NA	NA	1	214	Dominican Republic	31/10/2000	10/12/2000	2000.83	2000.94	2000 MICS	MICS	0	NA	NA	NA	NA	NA	NA
1	1912	15-19	NA	NA	NA	NA	16.10169492	4.237288136	11.86440678	NA	NA	NA	NA	MW	0	NA	NA	1	31	Azerbaijan	01/08/2000	29/08/2000	2000.58	2000.66	2000 MICS	MICS	0	NA	NA	NA	NA	NA	NA
1	1913	15-19	NA	NA	NA	NA	20	17.3	2.7	17.5	NA	NA	NA	MW	0	NA	NA	1	12	Algeria	25/03/2006	10/06/2006	2006.23	2006.44	2006 MICS	MICS	0	NA	NA	NA	NA	NA	NA
1	1914	15-19	NA	NA	NA	NA	16.95052847	NA	NA	NA	NA	NA	NA	MW	0	NA	NA	1	120	Cameroon	01/07/2000	27/08/2000	2000.5	2000.65	2000 MICS	MICS	1	NaN	NaN	NaN	0	0	0
1	1916	15-19	NA	NA	NA	NA	35.22727273	34.09090909	1.136363636	NA	NA	NA	NA	MW	0	NA	NA	1	496	Mongolia	20/05/2000	12/08/2000	2000.38	2000.61	2000 MICS	MICS	0	NA	NA	NA	NA	NA	NA
1	1917	15-19	NA	NA	NA	NA	25.80645161	25	0.806451613	NA	NA	NA	NA	MW	0	NA	NA	1	860	Uzbekistan	24/07/2000	15/09/2000	2000.56	2000.7	2000 MICS	MICS	0	NA	NA	NA	NA	NA	NA
1	1919	15-19	NA	NA	NA	NA	38.70946313	37.70558707	1.003876067	NA	NA	NA	NA	MW	0	NA	NA	1	740	Suriname	01/04/2006	31/05/2006	2006.25	2006.41	2006 MICS	MICS	0	NA	NA	NA	NA	NA	NA
1	1920	15-19	NA	NA	NA	NA	15.38461538	14.68531469	0.699300699	NA	NA	NA	NA	MW	0	NA	NA	1	426	Lesotho	01/03/2000	31/05/2000	2000.16	2000.41	2000 MICS	MICS	0	NA	NA	NA	NA	NA	NA
1	1921	15-19	NA	NA	NA	NA	7.736110902	4.150343049	3.585767853	NA	NA	NA	NA	MW	0	NA	NA	1	226	Equatorial Guinea	NA	NA	2000.25	2000.75	2000 MICS	MICS	0	NA	NA	NA	NA	NA	NA
1	1922	15-19	NA	NA	NA	NA	16.28234126			NA	NA	NA	NA	MW	0	NA	NA	1	262	Djibouti	23/06/2006	23/08/2006	2006.47	2006.64	2006 MICS	MICS	0	NA	NA	NA	NA	NA	NA
1	1923	15-19	NA	NA	NA	NA	7.486772041	5.111610496	2.375161545	NA	NA	NA	NA	MW	0	NA	NA	1	562	Niger	16/04/2000	07/08/2000	2000.29	2000.6	2000 MICS	MICS	0	NA	NA	NA	NA	NA	NA
1	1924	15-19	NA	NA	NA	NA	8.888888889	6.666666667	2.222222222	NA	NA	NA	NA	MW	0	NA	NA	1	762	Tajikistan	06/07/2000	05/08/2000	2000.51	2000.59	2000 MICS	MICS	0	NA	NA	NA	NA	NA	NA
1	1926	15-19	NA	NA	NA	NA	18.24821745	16.46054921	1.78766824	NA	NA	NA	NA	MW	0	NA	NA	1	704	Viet Nam	NA	NA	2000.25	2000.75	2000 MICS	MICS	0	NA	NA	NA	NA	NA	NA
1	1927	15-19	NA	NA	NA	NA	24.9	19.9	5	NA	NA	NA	NA	MW	0	NA	NA	1	72	Botswana	23/05/2000	31/07/2000	2000.39	2000.58	2000 MICS	MICS	0	NA	NA	NA	NA	NA	NA
1	1929	15-19	NA	NA	NA	NA	28.11933808	24.6420091	3.477328978	NA	NA	NA	NA	MW	0	NA	NA	1	704	Viet Nam	28/08/2006	15/10/2006	2006.65	2006.79	2006 MICS	MICS	0	NA	NA	NA	NA	NA	NA
1	1930	15-19	NA	NA	NA	NA	34.52948636	19.43380485	15.09568151	NA	NA	NA	NA	MW	0	NA	NA	1	68	Bolivia (Plurinational State of)	15/08/2000	15/11/2000	2000.62	2000.87	2000 MICS	MICS	0	NA	NA	NA	NA	NA	NA
1	1931	15-19	NA	NA	NA	NA	19.99321976	19.21148766	0.781732102	NA	NA	NA	NA	MW	0	NA	NA	1	748	Eswatini	01/07/2000	30/09/2000	2000.5	2000.75	2000 MICS	MICS	0	NA	NA	NA	NA	NA	NA
1	1932	15-19	NA	NA	NA	NA	41.2	15.1	26.1	NA	NA	NA	NA	MW	0	NA	NA	1	422	Lebanon	01/11/2000	31/12/2000	2000.83	2001	2000 MICS	MICS	0	NA	NA	NA	NA	NA	NA
1	1934	15-19	NA	NA	NA	NA	16.91447214	7.241091942	9.673380199	NA	NA	NA	NA	MW	0	NA	NA	1	140	Central African Republic	NA	NA	2000.25	2000.75	2000 MICS	MICS	0	NA	NA	NA	NA	NA	NA
1	1935	15-19	NA	NA	NA	NA	24.32694595	7.831472957	16.49547299	NA	NA	NA	NA	MW	0	NA	NA	1	180	Dem. Rep. of the Congo	15/04/2001	15/10/2001	2001.28	2001.79	2001 MICS	MICS	0	NA	NA	NA	NA	NA	NA
1	1936	15-19	NA	NA	NA	NA	1.488502651	1.007176669	0.481325982	NA	NA	NA	NA	MW	0	NA	NA	1	694	Sierra Leone	01/04/2000	07/05/2000	2000.25	2000.35	2000 MICS	MICS	0	NA	NA	NA	NA	NA	NA
1	1937	15-19	NA	NA	NA	NA	3.031812194	2.202777635	0.829034559	NA	NA	NA	NA	MW	0	NA	NA	1	24	Angola	01/04/2001	31/10/2001	2001.25	2001.83	2001 MICS	MICS	0	NA	NA	NA	NA	NA	NA
1	1939	15-19	NA	NA	NA	NA	26.31334189	25.85466867	0.458673219	NA	NA	NA	NA	MW	0	NA	NA	1	328	Guyana	01/08/2000	31/10/2000	2000.58	2000.83	2000 MICS	MICS	1	NA	NA	NA	NA	NA	NA
1	1941	15-19	NA	NA	NA	NA	22.37647603	17.44272065	4.93375538	NA	NA	NA	NA	MW	0	NA	NA	1	174	Comoros	05/10/2000	20/11/2000	2000.76	2000.89	2000 MICS	MICS	0	NA	NA	NA	NA	NA	NA
1	1943	15-19	NA	NA	NA	NA	37.67705129	16.28720332	21.38984797	NA	NA	NA	NA	MW	0	NA	NA	1	8	Albania	01/06/2000	07/07/2000	2000.42	2000.51	2000 MICS	MICS	0	NA	NA	NA	NA	NA	NA
1	1945	15-19	NA	NA	NA	NA	23.39300487	21.10028509	2.29271978	NA	NA	NA	NA	MW	0	NA	NA	1	740	Suriname	01/11/1999	30/04/2000	1999.83	2000.33	2000 MICS	MICS	0	NA	NA	NA	NA	NA	NA
1	1946	15-19	NA	NA	NA	NA	16.66666667	2.083333333	14.58333333	NA	NA	NA	NA	MW	0	NA	NA	0	768	Togo	01/06/1988	30/11/1988	1988.42	1988.91	1988 DHS	DHS	0	NA	NA	NA	NA	NA	NA
1	1947	15-19	NA	NA	NA	NA	8.695048689	3.448712006	5.246336683	26.95608568	NA	NA	NA	MW	0	NA	NA	0	894	Zambia	01/01/1992	31/05/1992	1992	1992.41	1992 DHS	DHS	0	0.269990702	0.20196703	0.113446384	0.00720679	0.006330884	0.016842967
1	2027	15-19	NA	NA	NA	NA	24.9	16.2	8.7	NA	NA	NA	NA	MW	0	NA	NA	0	716	Zimbabwe	16/07/1984	15/10/1984	1984.54	1984.79	1984 RHS	CPS	0	NA	NA	NA	NA	NA	NA
1	2296	15-19	NA	NA	NA	NA	32.33330809	11.54055896	20.79274913	NA	NA	NA	NA	MW	0	NA	NA	1	70	Bosnia and Herzegovina	15/05/2006	10/07/2006	2006.37	2006.52	2006 MICS	MICS	0	NA	NA	NA	NA	NA	NA
1	2312	15-19	NA	NA	NA	NA	16.63745287	8.607519833	8.029933033	NA	NA	NA	NA	MW	0	NA	NA	1	120	Cameroon	02/05/2006	20/06/2006	2006.33	2006.47	2006 MICS	MICS	0	NA	NA	NA	NA	NA	NA
1	2363	15-19	NA	Traditional methods include folk methods.	NA	NA	6.9	4.6	2.3	NA	NA	NA	NA	MW	0	NA	Including folk methods.	0	270	Gambia	25/07/2001	08/11/2001	2001.56	2001.85	2001 NSMCP	National survey	0	NA	NA	NA	NA	NA	NA
1	2398	15-19	NA	NA	NA	NA	16.31407714	14.33420786	1.979869283	NA	NA	NA	NA	MW	0	NA	NA	1	384	CÃ´te d'Ivoire	14/08/2006	31/10/2006	2006.62	2006.83	2006 MICS	MICS	0	NA	NA	NA	NA	NA	NA
1	2407	15-19	NA	NA	NA	NA	24.37444419	15.11546475	9.258979438	9.734178144	NA	NA	NA	MW	0	NA	NA	0	400	Jordan	01/06/2007	30/11/2007	2007.41	2007.91	2007 DHS	DHS	0	0.315519916	0.388777605	0.333166769	0.037429435	0.028220137	0.024256194
1	2416	15-19	NA	NA	NA	NA	22.3	13	9.3	NA	NA	NA	NA	MW	0	NA	NA	0	422	Lebanon	05/04/2004	27/11/2004	2004.26	2004.9	2004 FHS	PAPFAM	0	NA	NA	NA	NA	NA	NA
1	2443	15-19	NA	NA	NA	NA	5.5	4.9	0.6	17.5	NA	NA	NA	MW	0	NA	NA	1	478	Mauritania	01/05/2007	30/09/2007	2007.33	2007.75	2007 MICS	MICS	0	NA	NA	NA	NA	NA	NA
1	2478	15-19	NA	NA	NA	NA	4.189385369	3.49350448	0.695880889	NA	NA	NA	NA	MW	0	NA	NA	1	566	Nigeria	01/03/2007	15/04/2007	2007.16	2007.28	2007 MICS	MICS	0	NA	NA	NA	NA	NA	NA
1	2515	15-19	NA	NA	NA	NA	59.30874682	43.97227999	15.33646683	23.66939485	NA	NA	NA	MW	0	NA	NA	0	604	Peru	01/12/2003	31/12/2006	2003.92	2007	2004-2006 DHS	DHS	0	0.111205293	0.178536603	0.156130658	0.026332088	0.014402544	0.026229822
1	2516	15-19	NA	NA	NA	NA	63.60729118	44.60530607	19.00198511	23.10588762	NA	NA	NA	MW	0	NA	NA	0	604	Peru	01/03/2010	31/12/2010	2010.16	2011	2010 DHS	DHS	0	0.12473394	0.146390993	0.175396618	0.021006789	0.012531829	0.013199789
1	2517	15-19	NA	NA	NA	NA	60.32868828	41.5258468	18.80284148	26.62669437	NA	NA	NA	MW	0	NA	NA	0	604	Peru	01/01/2007	31/10/2008	2007	2008.83	2007-2008 DHS	DHS	0	0.134232444	0.158050215	0.178320527	0.023704087	0.017599422	0.023357611
1	2556	15-19	NA	NA	NA	NA	22.23126227	21.41199758	0.819264695	48.25681734	NA	NA	NA	MW	0	NA	NA	0	678	Sao Tome and Principe	01/09/2008	31/01/2009	2008.67	2009.08	2008-2009 DHS	DHS	0	0.250484891	1.000009322	0.266118391	0.042217566	0.008145317	0.05975339
1	2557	15-19	NA	NA	NA	NA	27.43353416	7.859659318	19.57387484	NA	NA	NA	NA	MW	0	NA	NA	1	688	Serbia	01/10/2005	31/01/2006	2005.75	2006.08	2005-2006 MICS	MICS	0	NA	NA	NA	NA	NA	NA
1	2585	15-19	NA	NA	NA	NA	20			NA	NA	NA	NA	MW	0	NA	NA	1	788	Tunisia	01/06/2006	30/08/2006	2006.41	2006.66	2006 MICS	MICS	0	NA	NA	NA	NA	NA	NA
1	2623	15-19	NA	NA	NA	NA	10.38485948	6.072088383	4.312771099	NA	NA	NA	NA	MW	0	NA	NA	1	887	Yemen	01/09/2006	30/09/2006	2006.67	2006.75	2006 MICS	MICS	0	NA	NA	NA	NA	NA	NA
1	2707	15-19	NA	NA	NA	Data pertain to women exposed to the risk of pregnancy.	19.4	NA	NA	NA	NA	+	NA	MW	0	NA	NA	0	28	Antigua and Barbuda	NA	NA	1981.25	1981.75	1981 CPS	CPS	0	NA	NA	NA	NA	NA	NA
1	2714	15-19	NA	NA	NA	Data pertain to women exposed to the risk of pregnancy.	39.5	NA	NA	NA	NA	+	NA	MW	0	NA	NA	0	212	Dominica	NA	NA	1981.25	1981.75	1981 CPS	CPS	0	NA	NA	NA	NA	NA	NA
1	2720	15-19	NA	NA	NA	Data pertain to women exposed to the risk of pregnancy.	36.7	NA	NA	NA	NA	+	NA	MW	0	NA	NA	0	662	Saint Lucia	NA	NA	1981.25	1981.75	1981 CPS	CPS	0	NA	NA	NA	NA	NA	NA
1	2721	15-19	NA	NA	NA	Data pertain to women exposed to the risk of pregnancy.	33.3	NA	NA	NA	NA	+	NA	MW	0	NA	NA	0	670	Saint Vincent and the Grenadines	NA	NA	1981.25	1981.75	1981 CPS	CPS	0	NA	NA	NA	NA	NA	NA
1	2729	15-19	NA	NA	NA	NA	40.6	NA	NA	NA	NA	NA	NA	MW	0	NA	NA	0	630	Puerto Rico	NA	NA	1982.25	1982.75	1982 FFPA	National survey	0	NA	NA	NA	NA	NA	NA
1	2732	15-19	NA	NA	Excluding the Northern and Eastern Province.	NA	27.7	NA	NA	NA	Excluding the Northern and Eastern Province.	NA	NA	MW	0	NA	NA	0	144	Sri Lanka	NA	NA	1982.25	1982.75	1982 CPS	CPS	0	NA	NA	NA	NA	NA	NA
1	2734	15-19	NA	NA	NA	NA	9.3	6.6	2.7	NA	NA	NA	NA	MW	0	NA	NA	0	320	Guatemala	01/09/1983	31/12/1983	1983.67	1984	1983 RHS	RHS	0	NA	NA	NA	NA	NA	NA
1	2735	15-19	NA	NA	NA	NA	34.3	31.7	2.6	NA	NA	NA	NA	MW	0	NA	NA	0	388	Jamaica	NA	NA	1983.25	1983.75	1983 CPS	CPS	0	NA	NA	NA	NA	NA	NA
1	2743	15-19	NA	NA	NA	NA	5.6	1.5	4.1	NA	NA	NA	NA	MW	0	NA	NA	0	404	Kenya	NA	NA	1984.25	1984.75	1984 CPS	CPS	0	NA	NA	NA	NA	NA	NA
1	2748	15-19	NA	NA	NA	NA	30.4	NA	NA	NA	NA	NA	NA	MW	0	NA	NA	0	659	Saint Kitts and Nevis	NA	NA	1984.25	1984.75	1984 CPS	CPS	0	NA	NA	NA	NA	NA	NA
1	2751	15-19	NA	NA	NA	NA	17.2	16.856	0.344	NA	NA	NA	NA	MW	0	NA	NA	0	308	Grenada	NA	NA	1985.25	1985.75	1985 CCPS	CCPS	0	NA	NA	NA	NA	NA	NA
1	2756	18-19	NA	NA	NA	NA	39.343222	25.810802	13.5324201	NA	NA	NA	NA	MW	+	NA	NA	0	724	Spain	NA	NA	1985.25	1985.75	1985 FS	National survey	0	NA	NA	NA	NA	NA	NA
1	2766	15-19	NA	NA	NA	NA	78.5	NA	NA	NA	NA	NA	NA	MW	0	NA	NA	0	858	Uruguay	NA	NA	1986.25	1986.75	1986 EF	National survey	0	NA	NA	NA	NA	NA	NA
1	2768	15-19	NA	NA	NA	NA	29.8			NA	NA	NA	NA	MW	0	NA	NA	0	212	Dominica	NA	NA	1987.25	1987.75	1987 CCPS	CCPS	0	NA	NA	NA	NA	NA	NA
1	2772	15-19	NA	Traditional methods include folk methods.	NA	NA	31	17.9	13.1	NA	NA	NA	NA	MW	0	NA	Including folk methods.	0	600	Paraguay	NA	NA	1987.25	1987.75	1987 RHS	RHS	0	NA	NA	NA	NA	NA	NA
1	2777	15-19	NA	NA	NA	Data pertain to fecund women.	40.7	38.9906	1.7094	NA	NA	+	NA	MW	0	NA	NA	0	44	Bahamas	NA	NA	1988.25	1988.75	1988 CCPS	CCPS	0	NA	NA	NA	NA	NA	NA
1	2778	15-19	NA	NA	NA	NA	50.7	47.8608	2.8392	NA	NA	NA	NA	MW	0	NA	NA	0	52	Barbados	NA	NA	1988.25	1988.75	1988 CCPS	CCPS	0	NA	NA	NA	NA	NA	NA
1	2788	15-19	NA	NA	NA	NA	33.3	NA	NA	NA	NA	NA	NA	MW	0	NA	NA	0	662	Saint Lucia	NA	NA	1988.25	1988.75	1988 CCPS	CCPS	0	NA	NA	NA	NA	NA	NA
1	2789	15-19	NA	NA	NA	Data pertain to fecund women.	44.4	NA	NA	NA	NA	+	NA	MW	0	NA	NA	0	670	Saint Vincent and the Grenadines	NA	NA	1988.25	1988.75	1988 CCPS	CCPS	0	NA	NA	NA	NA	NA	NA
1	2797	15-19	NA	Traditional methods include folk methods.	NA	NA	4.3	1.4	2.9	NA	NA	NA	NA	MW	0	NA	Including folk methods.	0	270	Gambia	NA	NA	1990.25	1990.75	1990 GCPFDS	CPS	0	NA	NA	NA	NA	NA	NA
1	2798	15-19	NA	NA	NA	NA	33.3	NA	NA	NA	NA	NA	NA	MW	0	NA	NA	0	308	Grenada	NA	NA	1990.25	1990.75	1990 CCPS	CCPS	0	NA	NA	NA	NA	NA	NA
1	2802	15-19	NA	NA	NA	NA	19.5	14.2	5.3	NA	NA	NA	NA	MW	0	NA	NA	0	50	Bangladesh	NA	NA	1991.25	1991.75	1991 CPS	CPS	0	NA	NA	NA	NA	NA	NA
1	2808	15-19	NA	NA	NA	NA	2.8	1.2	1.6	NA	NA	NA	NA	MW	0	NA	NA	0	180	Dem. Rep. of the Congo	NA	NA	1991.25	1991.75	1991 Survey	RHS	0	NA	NA	NA	NA	NA	NA
1	2809	15-19	NA	NA	NA	NA	18.1	NA	NA	NA	NA	NA	NA	MW	0	NA	NA	0	328	Guyana	NA	NA	1991.25	1991.75	1991-1992 CCPS	CCPS	0	NA	NA	NA	NA	NA	NA
1	2813	15-19	NA	NA	NA	NA	48	NA	NA	6	NA	NA	NA	MW	0	NA	NA	0	480	Mauritius	01/04/1991	31/08/1991	1991.25	1991.66	1991 CPS	RHS	0	NA	NA	NA	NA	NA	NA
1	2820	15-19	NA	NA	NA	NA	53	44	9	NA	NA	NA	NA	MW	0	NA	NA	0	188	Costa Rica	05/10/1992	01/03/1993	1992.76	1993.16	1993 RHS	RHS	0	NA	NA	NA	NA	NA	NA
1	2822	18-19	NA	NA	NA	NA	77.7	62.9	14.8	NA	NA	NA	NA	MW	+	NA	NA	0	348	Hungary	01/11/1992	31/12/1993	1992.83	1994	1992-1993 FFS	FFS	0	NA	NA	NA	NA	NA	NA
1	2829	15-19	NA	NA	NA	NA	51	27.1	23.9	NA	NA	NA	NA	MW	0	NA	NA	0	203	Czechia	01/02/1993	30/06/1993	1993.08	1993.49	1993 RHS	RHS	0	NA	NA	NA	NA	NA	NA
1	2830	15-19	NA	NA	NA	NA	58.8	54.4	4.4	NA	NA	NA	NA	MW	0	NA	NA	0	388	Jamaica	NA	NA	1993.25	1993.75	1993 CPS	CPS	0	NA	NA	NA	NA	NA	NA
1	2831	18-19	NA	NA	NA	NA	92			NA	NA	NA	NA	MW	+	NA	NA	0	528	Netherlands	01/02/1993	30/06/1993	1993.08	1993.49	1993 FFS	FFS	0	NA	NA	NA	NA	NA	NA
1	2832	15-19	NA	NA	NA	NA	2.1	1.5	0.7	NA	NA	NA	NA	MW	0	NA	NA	0	586	Pakistan	01/05/1993	30/06/1993	1993.33	1993.49	1993 CPS	CPS	0	NA	NA	NA	NA	NA	NA
1	2833	15-19	NA	NA	Excluding the Northern and Eastern Province.	NA	30.3	17.6	12.7	NA	Excluding the Northern and Eastern Province.	NA	NA	MW	0	NA	NA	0	144	Sri Lanka	NA	NA	1993.25	1993.75	1993 DHS	National survey	0	NA	NA	NA	NA	NA	NA
1	2841	18-19	NA	NA	NA	NA	47.00761697	32.31773667	14.6898803	NA	NA	NA	NA	MW	+	NA	NA	0	440	Lithuania	01/10/1994	31/12/1995	1994.75	1996	1994-1995 FFS	FFS	0	NA	NA	NA	NA	NA	NA
1	2843	15-19	NA	NA	NA	NA	3.4	1.7	1.7	NA	NA	NA	NA	MW	0	NA	NA	0	586	Pakistan	06/11/1994	25/03/1995	1994.85	1995.23	1994-1995 CPS	CPS	0	NA	NA	NA	NA	NA	NA
1	2845	15-19	NA	NA	NA	NA	59.37834941	37.62057878	21.75777063	NA	NA	NA	NA	MW	0	NA	NA	0	705	Slovenia	01/12/1994	31/12/1995	1994.92	1996	1994-1995 FFS	FFS	0	NA	NA	NA	NA	NA	NA
1	2851	15-19	NA	NA	NA	NA	65	17.5	47.5	NA	NA	NA	NA	MW	0	NA	NA	0	100	Bulgaria	NA	NA	1995.25	1995.75	1995 WTS	National survey	0	NA	NA	NA	NA	NA	NA
1	2854	15-19	NA	NA	NA	NA	62.7			NA	NA	NA	NA	MW	0	NA	NA	0	124	Canada	01/01/1995	31/12/1995	1995	1996	1995 FFS	FFS	0	NA	NA	NA	NA	NA	NA
1	2856	18-19	NA	NA	NA	NA	50.05834306	43.40723454	6.651108518	NA	NA	NA	NA	MW	+	NA	NA	0	428	Latvia	01/09/1995	31/10/1995	1995.67	1995.83	1995 FFS	FFS	0	NA	NA	NA	NA	NA	NA
1	2860	18-19	NA	Modern methods include some cases of sterilisation for non-contraceptive reasons.	NA	NA	85.7	64.1	21.6	NA	NA	NA	NA	MW	+	NA	NA	0	724	Spain	01/11/1994	30/11/1995	1994.83	1995.91	1994-1995 FFS	FFS	0	NA	NA	NA	NA	NA	NA
1	2865	15-19	NA	NA	NA	NA	55			9.1	NA	NA	NA	MW	0	NA	NA	0	184	Cook Islands	NA	NA	1996.25	1996.75	1996 KAP	National survey	0	NA	NA	NA	NA	NA	NA
1	2872	15-19	NA	NA	NA	NA	53.5	46.2	7.3	NA	NA	NA	NA	MW	0	NA	NA	0	203	Czechia	01/10/1997	31/12/1997	1997.75	1998	1997 FFS	FFS	0	NA	NA	NA	NA	NA	NA
1	2876	15-19	NA	NA	NA	NA	58.7	55.3	3.3	NA	NA	NA	NA	MW	0	NA	NA	0	388	Jamaica	01/08/1997	31/12/1997	1997.58	1998	1997 RHS	RHS	0	NA	NA	NA	NA	NA	NA
1	2886	18-19	NA	NA	NA	NA	70	NA	NA	NA	NA	NA	NA	MW	+	NA	NA	0	188	Costa Rica	NA	NA	1999.25	1999.75	1999 ESR	National survey	0	NA	NA	NA	NA	NA	NA
1	2889	15-20	NA	NA	NA	NA	27	18	9	NA	NA	NA	NA	MW	?	NA	NA	0	462	Maldives	NA	NA	1999.25	1999.75	1999 RHBS	National survey	0	NA	NA	NA	NA	NA	NA
1	2890	15-19	NA	NA	NA	NA	78.20156	63.12309	15.0784765	NA	NA	NA	NA	MW	0	NA	NA	0	724	Spain	NA	NA	1999.25	1999.75	1999 FS	National survey	0	NA	NA	NA	NA	NA	NA
1	2892	15-19	NA	NA	NA	NA	13.1588528	NA	NA	NA	NA	NA	NA	MW	0	NA	NA	1	894	Zambia	01/10/1999	31/10/1999	1999.75	1999.83	1999 MICS	MICS	0	NA	NA	NA	NA	NA	NA
1	2893	Dec-19	NA	NA	Data pertain to Nangarhar, Konar and Laghman, Ghazni, Paktika and Paktya, Logar and Wardak provinces.	NA	2.5	0.6	1.2	NA	Data pertain to Nangarhar, Konar and Laghman, Ghazni, Paktika and Paktya, Logar and Wardak provinces.	NA	NA	MW	?	NA	NA	1	4	Afghanistan	01/06/2000	31/10/2000	2000.42	2000.83	2000 MICS	MICS	0	NA	NA	NA	NA	NA	NA
1	2894	15-19	NA	NA	NA	NA	31.88405797	10.14492754	21.73913043	NA	NA	NA	NA	MW	0	NA	NA	1	70	Bosnia and Herzegovina	20/08/2000	20/10/2000	2000.63	2000.8	2000 MICS	MICS	0	NA	NA	NA	NA	NA	NA
1	2896	15-19	NA	NA	NA	Data pertain to sexually active women of reproductive age.	73.3	72.6	0.7	NA	NA	NA	NA	SA	0	NA	NA	1	192	Cuba	01/07/2000	31/08/2000	2000.5	2000.66	2000 MICS	MICS	0	NA	NA	NA	NA	NA	NA
1	2900	15-19	NA	NA	NA	NA	42.31684997	26.90035989	15.41649008	NA	NA	NA	NA	MW	0	NA	NA	1	498	Republic of Moldova	10/07/2000	05/09/2000	2000.52	2000.68	2000 MICS	MICS	0	NA	NA	NA	NA	NA	NA
1	2902	15-19	NA	NA	NA	NA	52.8	41	11.8	NA	NA	NA	NA	MW	0	NA	NA	0	144	Sri Lanka	01/05/2000	31/08/2000	2000.33	2000.66	2000 DHS	National survey	0	NA	NA	NA	NA	NA	NA
1	2903	15-19	NA	NA	NA	NA	20.46944478	7.070754216	13.39869057	NA	NA	NA	NA	MW	0	NA	NA	1	768	Togo	NA	NA	2000.25	2000.75	2000 MICS	MICS	0	NA	NA	NA	NA	NA	NA
1	2912	15-19	NA	NA	NA	NA	30.9	NA	NA	NA	NA	NA	NA	MW	0	NA	NA	0	156	China	NA	NA	2001.25	2001.75	2001 FPRHS	National survey	0	NA	NA	NA	NA	NA	NA
1	2922	15-19	NA	NA	NA	NA	68.8	67.3	1.5	NA	NA	NA	NA	MW	0	NA	NA	0	388	Jamaica	NA	NA	2002.25	2002.75	2002-2003 RHS	RHS	0	NA	NA	NA	NA	NA	NA
1	2931	15-19	NA	NA	NA	NA	45.3	NA	NA	NA	NA	NA	NA	MW	0	NA	NA	0	484	Mexico	NA	NA	2003.25	2003.75	2003 ENSR	National survey	0	NA	NA	NA	NA	NA	NA
1	2932	15-19	NA	NA	NA	NA	13.2			NA	NA	NA	NA	MW	0	NA	NA	0	524	Nepal	NA	NA	2003.25	2003.75	2003-2004 LSMS	LSMS	0	NA	NA	NA	NA	NA	NA
1	2936	15-20	NA	NA	NA	NA	NA	23	NA	NA	NA	NA	NA	MW	?	NA	NA	0	462	Maldives	NA	NA	2004.25	2004.75	2004 RHBS	National survey	0	NA	NA	NA	NA	NA	NA
1	2939	15-19	NA	Traditional methods include folk methods.	NA	NA	13.9	12	1.9	NA	NA	NA	NA	MW	0	NA	Including folk methods.	0	834	United Republic of Tanzania	01/12/2003	31/03/2004	2003.92	2004.25	2003-2004 AIS	National survey	0	NA	NA	NA	NA	NA	NA
1	2942	15-19	NA	NA	NA	NA	55.3	53.7	1.6	23.3	NA	NA	NA	MW	0	NA	NA	0	132	Cabo Verde	01/07/2005	31/12/2005	2005.5	2006	2005 DHS-RHS	DHS	0	NA	NA	NA	NA	NA	NA
1	2943	15-19	NA	NA	NA	Data pertain to sexually active, non-pregnant women.	72.82296651	NA	NA	NA	NA	NA	NA	SA	0	NA	NA	0	620	Portugal	NA	NA	2005.25	2005.75	2005-2006 HS	National survey	0	NA	NA	NA	NA	NA	NA
1	2947	15-19	NA	NA	NA	NA	39.4	NA	NA	36	NA	NA	NA	MW	0	NA	NA	0	484	Mexico	NA	NA	2006.25	2006.75	2006 ENADID	National survey	0	NA	NA	NA	NA	NA	NA
1	2948	15-19	NA	NA	NA	NA	61.1	59.7	1.4	NA	NA	NA	NA	MW	0	NA	NA	0	558	Nicaragua	01/09/2006	30/04/2007	2006.67	2007.33	2006-2007 RHS-NDHS	RHS	0	NA	NA	NA	NA	NA	NA
1	2952	15-19	NA	Traditional methods include other methods.	NA	NA	66.3	63.3	3	NA	NA	NA	NA	MW	0	NA	NA	0	76	Brazil	01/11/2006	30/05/2007	2006.83	2007.41	2006-2007 PNDS	National survey	0	NA	NA	NA	NA	NA	NA
1	2953	15-19	NA	Traditional methods include folk methods.	NA	NA	19.5	12.8	6.7	15	NA	NA	NA	MW	0	NA	Including folk methods.	0	90	Solomon Islands	09/10/2006	30/04/2007	2006.77	2007.33	2006-2007 DHS	DHS	0	NA	NA	NA	NA	NA	NA
1	3088	15-19	NA	NA	NA	NA	21	17	4	NA	NA	NA	NA	MW	0	NA	NA	0	242	Fiji	NA	NA	1974.25	1974.75	1974 WFS	WFS	0	NA	NA	NA	NA	NA	NA
1	3119	15-19	NA	NA	NA	NA	32.7	28.1	4.6	NA	NA	NA	NA	MW	0	NA	NA	0	320	Guatemala	01/10/2008	30/06/2009	2008.75	2009.49	2008-2009 ENSMI	RHS	0	NA	NA	NA	NA	NA	NA
1	3120	15-19	NA	NA	NA	NA	18	10	8	NA	NA	NA	NA	MW	0	NA	NA	0	328	Guyana	01/05/1975	30/06/1975	1975.33	1975.49	1975 WFS	WFS	0	NA	NA	NA	NA	NA	NA
1	3129	15-19	NA	NA	NA	NA	52.9	44.4	8.5	NA	NA	NA	NA	MW	0	NA	NA	0	348	Hungary	01/05/1977	30/06/1977	1977.33	1977.49	1977 WFS	WFS	0	NA	NA	NA	NA	NA	NA
1	3168	15-19	NA	NA	NA	NA	72.5	68.4	4.1	NA	NA	NA	NA	MW	0	NA	NA	0	388	Jamaica	01/06/2008	30/04/2009	2008.42	2009.33	2008 RHS	RHS	0	NA	NA	NA	NA	NA	NA
1	3231	18-19	NA	NA	NA	NA	92	NA	NA	NA	NA	NA	NA	MW	+	NA	NA	0	528	Netherlands	01/07/1998	01/05/1998	1998.5	1998.33	1998 FFS	National survey	0	NA	NA	NA	NA	NA	NA
1	3233	18-19	NA	NA	NA	NA	87	NA	NA	NA	NA	NA	NA	MW	+	NA	NA	0	528	Netherlands	01/02/2003	01/05/2003	2003.08	2003.33	2003 FFS	National survey	0	NA	NA	NA	NA	NA	NA
1	3259	15-19	NA	Traditional methods include folk methods.	NA	NA	25.1	23.7	1.4	34.5	NA	NA	NA	MW	0	NA	Including folk methods.	0	584	Marshall Islands	08/02/2007	07/06/2007	2007.1	2007.43	2007 DHS	National survey	0	NA	NA	NA	NA	NA	NA
1	3267	15-19	NA	NA	NA	NA	18.4	12.1	6.4	NA	NA	NA	NA	MW	0	NA	NA	0	598	Papua New Guinea	01/10/2006	31/01/2007	2006.75	2007.08	2006 DHS	National survey	0	NA	NA	NA	NA	NA	NA
1	3269	15-19	NA	NA	NA	NA	19.1	7.8	11.4	NA	NA	NA	NA	MW	0	NA	NA	0	608	Philippines	NA	NA	1995.25	1995.75	Annual FPS	National survey	0	NA	NA	NA	NA	NA	NA
1	3270	15-19	NA	NA	NA	NA	20.8	12.4	8.4	NA	NA	NA	NA	MW	0	NA	NA	0	608	Philippines	NA	NA	1996.25	1996.75	Annual FPS	National survey	0	NA	NA	NA	NA	NA	NA
1	3271	15-19	NA	NA	NA	NA	25.9	17.4	8.5	NA	NA	NA	NA	MW	0	NA	NA	0	608	Philippines	NA	NA	1997.25	1997.75	Annual FPS	National survey	0	NA	NA	NA	NA	NA	NA
1	3273	15-19	NA	NA	NA	NA	21.9	14	7.8	NA	NA	NA	NA	MW	0	NA	NA	0	608	Philippines	NA	NA	1999.25	1999.75	Annual FPS	National survey	0	NA	NA	NA	NA	NA	NA
1	3275	15-19	NA	NA	NA	NA	20.7	14.3	6.4	NA	NA	NA	NA	MW	0	NA	NA	0	608	Philippines	NA	NA	2001.25	2001.75	Annual FPS	National survey	0	NA	NA	NA	NA	NA	NA
1	3276	15-19	NA	NA	NA	NA	18.8	13.5	5.3	NA	NA	NA	NA	MW	0	NA	NA	0	608	Philippines	NA	NA	2002.25	2002.75	Annual FPS	National survey	0	NA	NA	NA	NA	NA	NA
1	3278	15-19	NA	NA	NA	NA	25.2	16.1	9	NA	NA	NA	NA	MW	0	NA	NA	0	608	Philippines	NA	NA	2004.25	2004.75	Annual FPS	National survey	0	NA	NA	NA	NA	NA	NA
1	3279	15-19	NA	NA	NA	NA	22.8	17.6	5.1	NA	NA	NA	NA	MW	0	NA	NA	0	608	Philippines	NA	NA	2005.25	2005.75	Annual FPS	National survey	0	NA	NA	NA	NA	NA	NA
1	3281	15-19	NA	NA	Data pertain to the Mainland of Portugal (excluding the Autonomous Regions of Azores and Madeira).	Data pertain to women exposed to the risk of pregnancy.	76.81	60.87	15.94	NA	Data pertain to the Mainland of Portugal (excluding the Autonomous Regions of Azores and Madeira).	+	NA	MW	0	NA	NA	0	620	Portugal	01/10/1979	31/03/1980	1979.75	1980.25	1979-1980 WFS	WFS	0	NA	NA	NA	NA	NA	NA
1	3297	15-19	NA	NA	Data pertain to nationals of the country.	NA	7.575716713	NA	NA	NA	Data pertain to nationals of the country.	NA	NA	MW	0	NA	NA	0	682	Saudi Arabia	15/02/2007	15/02/2007	2007.12	2007.12	2007 DS	National survey	0	NA	NA	NA	NA	NA	NA
1	3309	15-19	NA	NA	NA	NA	84.7	82.3	2.4	NA	NA	NA	NA	MW	0	NA	NA	0	724	Spain	NA	NA	2006.25	2006.75	2006 FVS	National survey	0	NA	NA	NA	NA	NA	NA
1	3319	15-19	NA	NA	NA	NA	3.8	NA	NA	NA	NA	NA	NA	MW	0	NA	NA	0	764	Thailand	01/04/1969	31/05/1970	1969.25	1970.41	1969-1970 LSSEDCT	National survey	0	NA	NA	NA	NA	NA	NA
1	3358	15-19	NA	Traditional methods include folk methods.	NA	NA	8.1			NA	NA	NA	NA	MW	0	NA	Including folk methods.	0	882	Samoa	01/08/2009	30/09/2009	2009.58	2009.75	2009 DHS	DHS	0	NA	NA	NA	NA	NA	NA
1	4369	15-19	NA	NA	Excluding the six largest cities (Kabul, Hirat, Mazar-e-Sharif, Kunduz, Jalalabad and Kandahar), 5 of the 34 provinces in the country and 28 out of the selected 425 clusters where fieldwork was not completed due to security reasons.	NA	12.7	11.2	1.5	NA	Excluding the six largest cities (Kabul, Hirat, Mazar-e-Sharif, Kunduz, Jalalabad and Kandahar), 5 of the 34 provinces in the country and 28 out of the selected 425 clusters where fieldwork was not completed due to security reasons.	NA	NA	MW	0	NA	NA	0	4	Afghanistan	15/09/2006	30/11/2006	2006.7	2006.91	2006 HS	National survey	0	NA	NA	NA	NA	NA	NA
1	4439	15-19	NA	NA	NA	NA	16.50502206	5.944085156	10.56093691	NA	NA	NA	NA	MW	0	NA	NA	1	368	Iraq	01/09/2000	26/09/2000	2000.67	2000.73	2000 MICS	MICS	0	NA	NA	NA	NA	NA	NA
1	4448	15-19	NA	NA	NA	NA	62.9	NA	NA	NA	NA	NA	NA	MW	0	NA	NA	1	804	Ukraine	01/06/2000	31/08/2000	2000.42	2000.66	2000 MICS	MICS	0	NA	NA	NA	NA	NA	NA
1	4465	15-19	NA	NA	NA	NA	NA	5	NA	NA	NA	NA	NA	MW	0	NA	NA	0	4	Afghanistan	15/08/2007	31/08/2008	2007.62	2008.66	2007-2008 NRVA	National survey	0	NA	NA	NA	NA	NA	NA
1	4483	15-19	NA	NA	NA	NA	54.6624136	12.89609127	41.76632233	16.55518678	NA	NA	NA	MW	0	NA	NA	0	8	Albania	01/10/2008	30/04/2009	2008.75	2009.33	2008-2009 DHS	DHS	0	0.394221723	0.270653013	0.378808155	0.012290088	0.029409123	0.025678583
1	4492	15-19	NA	NA	NA	NA	40.88005655	26.55485843	14.32519812	37.90181591	NA	NA	NA	MW	0	NA	NA	0	68	Bolivia (Plurinational State of)	01/02/2008	30/06/2008	2008.08	2008.49	2008 DHS	DHS	0	0.118652114	0.1587966	0.1459618	0.022521244	0.018958675	0.024943471
1	4493	15-19	NA	NA	NA	NA	8.241452001	4.225162189	4.016289812	34.57911551	NA	NA	NA	MW	0	NA	NA	0	204	Benin	01/12/2011	31/03/2012	2011.92	2012.25	2011-2012 DHS	DHS	0	0.272352359	0.25219402	0.115218829	0.004573319	0.006707442	0.010971629
1	4494	15-19	NA	NA	NA	NA	6.588642165	6.169545295	0.419096869	21.72221464	NA	NA	NA	MW	0	NA	NA	0	854	Burkina Faso	01/05/2010	31/01/2011	2010.33	2011.08	2010 DHS-MICS	DHS	0	NA	NA	NA	NA	NA	NA
1	4541	15-19	NA	NA	Data pertain to nationals of the country.	NA	21.1	17.8	3.3	NA	Data pertain to nationals of the country.	NA	NA	MW	0	NA	NA	0	512	Oman	NA	NA	2000.25	2000.75	2000 CHS	National survey	0	NA	NA	NA	NA	NA	NA
1	4544	15-19	NA	NA	NA	NA	70.9	65.7	5.2	NA	NA	NA	NA	MW	0	NA	NA	0	600	Paraguay	01/06/2008	31/10/2008	2008.42	2008.83	2008 ENDSSR-RHS	RHS	0	NA	NA	NA	NA	NA	NA
1	4548	15-19	NA	NA	NA	NA	11.4	NA	NA	NA	NA	NA	NA	MW	0	NA	NA	0	410	Republic of Korea	NA	NA	1979.25	1979.75	1979 CPS	National survey	0	NA	NA	NA	NA	NA	NA
1	4550	15-19	NA	NA	NA	NA	1.1886783			23.02780576	NA	NA	NA	MW	0	NA	NA	0	694	Sierra Leone	01/04/2008	30/06/2008	2008.25	2008.49	2008 DHS	DHS	0	0.673277289	NaN	0.152720391	6.82E-04	0	0.014479287
1	4553	15-19	NA	Traditional methods include folk methods.	Excluding the Northern Province.	NA	53.7	44.9	8.9	13.9	Excluding the Northern Province.	NA	NA	MW	0	NA	Including folk methods.	0	144	Sri Lanka	01/09/2006	31/10/2007	2006.67	2007.83	2006-2007 DHS	DHS	0	NA	NA	NA	NA	NA	NA
1	4566	15-19	NA	NA	NA	NA	23.5			NA	NA	NA	NA	MW	0	NA	NA	0	496	Mongolia	NA	NA	2008.25	2008.75	2008 RHS	National survey	0	NA	NA	NA	NA	NA	NA
1	4567	15-19	NA	NA	NA	NA	28.22973697	24.72442583	3.430566097	NA	NA	NA	NA	MW	0	NA	NA	0	704	Viet Nam	01/04/2007	01/04/2007	2007.25	2007.25	Annual APC	National survey	0	NA	NA	NA	NA	NA	NA
1	4568	15-19	NA	NA	NA	NA	29.12755308	25.34521211	3.748633066	NA	NA	NA	NA	MW	0	NA	NA	0	704	Viet Nam	01/04/2008	15/04/2008	2008.25	2008.29	Annual APC	National survey	0	NA	NA	NA	NA	NA	NA
1	4618	15-19	NA	NA	NA	NA	11.4	9.9	1.5	20.1	NA	NA	NA	MW	0	NA	NA	0	418	Lao People's Dem. Republic	01/10/2005	31/10/2005	2005.75	2005.83	2005 RHS	National survey	0	NA	NA	NA	NA	NA	NA
1	4643	15-19	NA	NA	NA	NA	6	NA	NA	NA	NA	NA	NA	MW	0	NA	NA	0	764	Thailand	01/04/1972	31/05/1973	1972.25	1973.41	1972-1973 LSSEDCT	National survey	0	NA	NA	NA	NA	NA	NA
1	4685	15-19	NA	NA	NA	NA	23.43494072	19.76996409	3.664976634	7.038782177	NA	NA	NA	MW	0	NA	NA	0	818	Egypt	01/03/2008	30/06/2008	2008.16	2008.49	2008 DHS	DHS	0	0.112282381	0.241959453	0.17948039	0.010212238	0.004148114	0.007426262
1	4686	15-19	NA	NA	NA	NA	16.13853328	12.23916133	3.899371947	25.69223793	NA	NA	NA	MW	0	NA	NA	0	120	Cameroon	01/01/2011	31/08/2011	2011	2011.66	2011 DHS-MICS	DHS	0	0.137798344	0.190286286	0.112832464	0.007598909	0.00379959	0.009004575
1	4687	15-19	NA	NA	NA	NA	10.95914859	6.867162281	4.091986306	26.53001684	NA	NA	NA	MW	0	NA	NA	0	384	CÃ´te d'Ivoire	01/12/2011	31/05/2012	2011.92	2012.41	2011-2012 DHS-MICS	DHS	0	0.244243194	0.342617191	0.149985136	0.00493757	0.00424474	0.011572495
1	4688	15-19	NA	NA	NA	NA	13.62964814	7.633853434	5.995794706	61.70908681	NA	NA	NA	MW	0	NA	NA	0	288	Ghana	01/09/2008	30/11/2008	2008.67	2008.91	2008 DHS	DHS	0	0.435328223	0.54553528	0.242812331	0.024872199	0.012811985	0.042404421
1	4689	15-19	NA	NA	NA	NA	22.50598321	19.56739536	2.938587851	29.6565442	NA	NA	NA	MW	0	NA	NA	0	404	Kenya	01/11/2008	28/02/2009	2008.83	2009.16	2008-2009 DHS	DHS	0	0.267280283	0.46822132	0.256391361	0.015791451	0.002483827	0.010006439
1	4691	15-19	NA	NA	NA	NA	24.60319483	16.45465359	8.148541235	26.81233143	NA	NA	NA	MW	0	NA	NA	0	450	Madagascar	01/11/2008	31/08/2009	2008.83	2009.66	2008-2009 DHS	DHS	0	0.108001627	0.115341708	0.080175579	0.007582674	0.004696436	0.007586517
1	4692	15-19	NA	NA	NA	NA	28.81308766	26.37394565	2.439142012	25.2348161	NA	NA	NA	MW	0	NA	NA	0	454	Malawi	01/06/2010	30/11/2010	2010.41	2010.91	2010 DHS	DHS	0	0.090830607	0.238266732	0.092462433	0.010807537	0.003393763	0.009081641
1	4695	15-19	NA	NA	NA	NA	2.995553835	2.385333519	0.610220316	18.00739479	NA	NA	NA	MW	0	NA	NA	0	566	Nigeria	01/06/2008	31/10/2008	2008.42	2008.83	2008 DHS	DHS	0	0.178506395	0.345101993	0.066223186	0.002377686	8.35E-04	0.007115646
1	4697	15-19	NA	NA	NA	NA	14.86808048	11.9561992	2.911881283	16.27639416	NA	NA	NA	MW	0	NA	NA	0	834	United Republic of Tanzania	01/12/2009	31/05/2010	2009.92	2010.41	2010 DHS	DHS	0	0.214334923	0.424043449	0.189216841	0.009801934	0.00501024	0.009961595
1	4698	15-19	NA	NA	NA	NA	26.96105433	15.92188157	11.03917276	8.350740442	NA	NA	NA	MW	0	NA	NA	0	400	Jordan	01/10/2009	31/12/2009	2009.75	2010	2009 DHS Interim	National survey	0	0.355928571	0.30815628	0.358666366	0.044247959	0.024359059	0.024763449
1	4699	15-19	NA	NA	NA	NA	15.01008537	9.587141122	5.422944253	36.87223923	NA	NA	NA	MW	0	NA	NA	0	462	Maldives	01/01/2009	31/10/2009	2009	2009.83	2009 DHS	DHS	0	0.394780641	0.531226984	0.252573358	0.022799275	0.025435857	0.053865668
1	4700	15-19	NA	NA	NA	NA	25.91151119	14.34741627	11.56409492	33.73955628	NA	NA	NA	MW	0	NA	NA	0	608	Philippines	01/08/2008	30/09/2008	2008.58	2008.75	2008 DHS	DHS	0	0.18135614	0.19402651	0.141021348	0.022175945	0.01975004	0.029168172
1	4701	15-19	NA	NA	NA	NA	29.75922102			34.92305177	NA	NA	NA	MW	0	NA	NA	0	328	Guyana	01/03/2009	31/07/2009	2009.16	2009.58	2009 DHS	DHS	0	0.239799084	NaN	0.267528925	0.033068953	0	0.017128979
1	4702	15-19	NA	NA	NA	NA	58.34899484	40.89385546	17.45513938	26.55561524	NA	NA	NA	MW	0	NA	NA	0	604	Peru	01/03/2009	30/11/2009	2009.16	2009.91	2009 DHS	DHS	0	0.12576209	0.146346072	0.161328162	0.0068176	0.008577408	0.005780988
1	4871	15-19	NA	NA	NA	NA	12.95758233	11.67619292	1.281389413	NA	NA	NA	NA	MW	0	NA	NA	1	508	Mozambique	01/08/2008	30/11/2008	2008.58	2008.91	2008 MICS	MICS	0	NA	NA	NA	NA	NA	NA
1	4873	15-19	NA	NA	NA	NA	10.6	6.9	3.7	NA	NA	NA	NA	MW	0	NA	NA	0	24	Angola	24/05/2008	30/06/2009	2008.39	2009.49	2008-2009 IBEP-MICS	National survey	0	NA	NA	NA	NA	NA	NA
1	4945	15-19	NA	NA	NA	NA	60.53171417	55.05146908	5.480245086	23.65220233	NA	NA	NA	MW	0	NA	NA	0	170	Colombia	01/11/2009	30/11/2010	2009.83	2010.91	2010 DHS	DHS	0	0.071351421	0.149522936	0.107509036	0.005208185	0.002123889	0.002928185
1	4947	15-19	NA	NA	NA	NA	28.18619272	26.79095864	1.395234077	29.64367075	NA	NA	NA	MW	0	NA	NA	0	426	Lesotho	01/10/2009	31/01/2010	2009.75	2010.08	2009 DHS	DHS	0	0.139423505	0.580977653	0.146367298	0.015975371	0.002399769	0.013407735
1	4948	15-19	NA	NA	NA	NA	7.851125335	6.812364046	1.03876129	27.39573379	NA	NA	NA	MW	0	NA	NA	0	626	Timor-Leste	01/08/2009	28/02/2010	2009.58	2010.16	2009-2010 DHS	DHS	0	NA	NA	NA	NA	NA	NA
1	4949	15-19	NA	NA	NA	NA	54.8	48.1	6.7	NA	NA	NA	NA	MW	0	NA	NA	0	222	El Salvador	01/04/2008	31/08/2008	2008.25	2008.66	2008 FESAL	RHS	0	NA	NA	NA	NA	NA	NA
1	4950	15-19	NA	NA	NA	NA	10.14867161	8.087613852	2.061057762	18.78574126	NA	NA	NA	MW	0	NA	NA	0	108	Burundi	01/08/2010	31/01/2011	2010.58	2011.08	2010 DHS	DHS	0	0.377070008	0.496934015	0.184306923	0.008766754	0.005184373	0.009588006
1	4951	15-19	NA	NA	NA	NA	27.06525885	18.84310444	8.222154409	16.01606617	NA	NA	NA	MW	0	NA	NA	0	116	Cambodia	01/07/2010	31/01/2011	2010.5	2011.08	2010 DHS	DHS	0	0.172876242	0.237483955	0.171652293	0.011214189	0.006960097	0.00550718
1	4952	15-19	NA	NA	NA	NA	10.7	6	4.7	NA	NA	NA	NA	MW	0	NA	NA	0	454	Malawi	01/06/1996	31/10/1996	1996.42	1996.83	1996 KAPS	National survey	0	NA	NA	NA	NA	NA	NA
1	4961	15-19	NA	NA	NA	NA	37.3	0.8	36.5	NA	NA	NA	NA	MW	0	NA	NA	0	100	Bulgaria	01/11/1976	31/12/1976	1976.83	1977	1976 WFS	WFS	0	NA	NA	NA	NA	NA	NA
1	4974	18-19	NA	Modern methods include some cases of sterilisation for non-contraceptive reasons.	NA	NA	40.4	36.5	3.8	NA	NA	NA	NA	MW	+	NA	NA	0	643	Russian Federation	NA	NA	2004.25	2004.75	2004 GGP	GGS	0	NA	NA	NA	NA	NA	NA
1	4983	15-19	NA	NA	NA	NA	7.093186556	6.587850436	0.50533612	NA	NA	NA	NA	MW	0	NA	NA	1	4	Afghanistan	01/10/2010	31/05/2011	2010.75	2011.41	2010-2011 MICS	MICS	0	NA	NA	NA	NA	NA	NA
1	4984	15-19	NA	NA	NA	NA	28.69918319	27.02579734	1.673385847	NA	NA	NA	NA	MW	0	NA	NA	1	12	Algeria	21/10/2012	31/01/2013	2012.8	2013.08	2012-2013 MICS	MICS	0	NA	NA	NA	NA	NA	NA
1	4986	15-19	NA	NA	NA	NA	54.69812009	51.40895278	3.289167306	NA	NA	NA	NA	MW	0	NA	NA	1	52	Barbados	01/05/2012	31/10/2012	2012.33	2012.83	2012 MICS	MICS	0	NA	NA	NA	NA	NA	NA
1	4988	15-19	NA	NA	NA	NA	35.68922722	33.83875812	1.8504691	NA	NA	NA	NA	MW	0	NA	NA	1	84	Belize	13/06/2011	05/08/2011	2011.45	2011.59	2011 MICS	MICS	0	NA	NA	NA	NA	NA	NA
1	4989	15-19	NA	NA	NA	NA	30.19457183			NA	NA	NA	NA	MW	0	NA	NA	1	64	Bhutan	01/04/2010	24/08/2010	2010.25	2010.64	2010 MICS	MICS	0	NA	NA	NA	NA	NA	NA
1	4991	15-19	NA	NA	NA	NA	13.44148001	9.289285444	4.152194563	NA	NA	NA	NA	MW	0	NA	NA	1	140	Central African Republic	22/06/2010	07/01/2011	2010.47	2011.02	2010 MICS	MICS	0	NA	NA	NA	NA	NA	NA
1	4992	15-19	NA	NA	NA	NA	4.396713762	3.792586747	0.604127015	NA	NA	NA	NA	MW	0	NA	NA	1	148	Chad	12/02/2010	31/05/2010	2010.12	2010.41	2010 MICS	MICS	0	NA	NA	NA	NA	NA	NA
1	4993	15-19	NA	NA	NA	NA	64.05323361			NA	NA	NA	NA	MW	0	NA	NA	1	188	Costa Rica	26/09/2011	27/11/2011	2011.73	2011.9	2011 MICS	MICS	0	NA	NA	NA	NA	NA	NA
1	4994	15-19	NA	NA	NA	NA	66.95698767			NA	NA	NA	NA	MW	0	NA	NA	1	192	Cuba	01/11/2010	30/04/2011	2010.83	2011.33	2010-2011 MICS	MICS	0	NA	NA	NA	NA	NA	NA
1	4996	15-19	NA	NA	NA	NA	12.85593597	4.517729339	8.338206628	NA	NA	NA	NA	MW	0	NA	NA	1	180	Dem. Rep. of the Congo	08/02/2010	26/04/2010	2010.1	2010.32	2010 MICS	MICS	0	NA	NA	NA	NA	NA	NA
1	4998	15-19	NA	NA	NA	NA	4.3	2.7	1.6	21.6	NA	NA	NA	MW	0	NA	NA	1	270	Gambia	01/04/2010	31/08/2010	2010.25	2010.66	2010 MICS	MICS	0	NA	NA	NA	NA	NA	NA
1	5000	15-19	NA	NA	NA	NA	17.04184437	12.84790277	4.193941602	NA	NA	NA	NA	MW	0	NA	NA	1	288	Ghana	01/09/2011	31/12/2011	2011.67	2012	2011 MICS	MICS	0	NA	NA	NA	NA	NA	NA
1	5002	15-19	NA	NA	NA	NA	7.4	7	0.4	5.8	NA	NA	NA	MW	0	NA	NA	1	624	Guinea-Bissau	12/03/2010	11/07/2010	2010.19	2010.52	2010 MICS	MICS	0	NA	NA	NA	NA	NA	NA
1	5006	15-19	NA	NA	NA	NA	19.18051059	18.44936418	0.731146402	NA	NA	NA	NA	MW	0	NA	NA	1	398	Kazakhstan	01/11/2010	31/01/2011	2010.83	2011.08	2010-2011 MICS	MICS	0	NA	NA	NA	NA	NA	NA
1	5011	15-19	NA	NA	NA	NA	6.249612205	5.876885378	0.372726827	NA	NA	NA	NA	MW	0	NA	NA	1	466	Mali	NA	NA	2009.25	2009.75	2009-2010 MICS	MICS	0	NA	NA	NA	NA	NA	NA
1	5012	15-19	NA	NA	NA	NA	3.91411289	2.068848338	1.845264551	NA	NA	NA	NA	MW	0	NA	NA	1	478	Mauritania	21/06/2011	09/10/2011	2011.47	2011.77	2011 MICS	MICS	0	NA	NA	NA	NA	NA	NA
1	5013	15-19	NA	NA	NA	NA	45.34164107	35.80684304	9.534798031	NA	NA	NA	NA	MW	0	NA	NA	1	498	Republic of Moldova	17/04/2012	30/06/2012	2012.29	2012.49	2012 MICS	MICS	0	NA	NA	NA	NA	NA	NA
1	5014	15-19	NA	NA	NA	NA	51.73568615			NA	NA	NA	NA	MW	0	NA	NA	1	496	Mongolia	04/08/2010	18/08/2010	2010.59	2010.63	2010 MICS	MICS	0	NA	NA	NA	NA	NA	NA
1	5018	15-19	NA	NA	NA	NA	3.534248362	2.577278844	0.956969518	NA	NA	NA	NA	MW	0	NA	NA	1	566	Nigeria	01/02/2011	31/03/2011	2011.08	2011.24	2011 MICS	MICS	0	NA	NA	NA	NA	NA	NA
1	5019	15-19	NA	NA	NA	NA	14.61057566	7.763466122	6.84710954	NA	NA	NA	NA	MW	0	NA	NA	1	275	State of Palestine	01/07/2010	30/09/2010	2010.5	2010.75	2010 FHS-MICS	National survey	0	NA	NA	NA	NA	NA	NA
1	5023	15-19	NA	NA	NA	NA	34.5589182	28.60523047	5.953687723	43.19626986	NA	NA	NA	MW	0	NA	NA	1	591	Panama	NA	NA	2013.25	2013.75	2013 MICS	MICS	0	NA	NA	NA	NA	NA	NA
1	5025	15-19	NA	NA	NA	NA	5.283059539	4.61105839	0.672001148	NA	NA	NA	NA	MW	0	NA	NA	1	694	Sierra Leone	01/10/2010	31/12/2010	2010.75	2011	2010 MICS	MICS	0	NA	NA	NA	NA	NA	NA
1	5030	15-19	NA	NA	NA	NA	42.14726763			NA	NA	NA	NA	MW	0	NA	NA	1	740	Suriname	11/07/2010	22/07/2010	2010.52	2010.55	2010 MICS	MICS	0	NA	NA	NA	NA	NA	NA
1	5034	15-19	NA	NA	NA	NA	73.24916664	68.78473587	4.464430775	NA	NA	NA	NA	MW	0	NA	NA	1	764	Thailand	01/09/2012	30/11/2012	2012.67	2012.91	2012 MICS	MICS	0	NA	NA	NA	NA	NA	NA
1	5036	15-19	NA	NA	NA	NA	5.054492425			NA	NA	NA	NA	MW	0	NA	NA	1	768	Togo	06/09/2010	04/11/2010	2010.68	2010.84	2010 MICS	MICS	0	NA	NA	NA	NA	NA	NA
1	5037	15-19	NA	NA	NA	NA	55.7	52.9	2.8	30.6	NA	NA	NA	MW	0	NA	NA	1	780	Trinidad and Tobago	24/10/2011	04/11/2011	2011.81	2011.84	2011 MICS	MICS	0	NA	NA	NA	NA	NA	NA
1	5040	15-19	NA	NA	NA	NA	51.23834299	38.17225261	13.06609039	NA	NA	NA	NA	MW	0	NA	NA	1	804	Ukraine	28/09/2012	31/12/2012	2012.74	2013	2012 MICS	MICS	0	NA	NA	NA	NA	NA	NA
1	5043	15-19	NA	NA	NA	NA	20.98703399	16.81282782	4.174206169	NA	NA	NA	NA	MW	0	NA	NA	1	704	Viet Nam	29/11/2010	26/01/2011	2010.91	2011.07	2011 MICS	MICS	0	NA	NA	NA	NA	NA	NA
1	5044	15-19	NA	NA	NA	NA	40.07250058	39.02506068	1.047439894	NA	NA	NA	NA	MW	0	NA	NA	1	716	Zimbabwe	20/04/2009	30/05/2009	2009.3	2009.41	2009 MICS	MICS	0	NA	NA	NA	NA	NA	NA
1	5045	15-19	NA	NA	Excluding areas in the South zone.	NA	9	8	1	NA	Excluding areas in the South zone.	NA	NA	MW	0	NA	NA	0	4	Afghanistan	01/04/2010	31/12/2010	2010.25	2011	2010 DHS Special	National survey	0	NA	NA	NA	NA	NA	NA
1	5046	15-19	NA	NA	NA	NA	19.10702714	3.127544086	15.97948305	26.96424429	NA	NA	NA	MW	0	NA	NA	0	51	Armenia	01/10/2010	31/12/2010	2010.75	2011	2010 DHS	DHS	0	1.049562902	0.45121015	0.430488076	0.043172849	0.04547764	0.095236353
1	5048	15-19	NA	NA	NA	NA	47.11853852	42.38145943	4.737079097	17.01148566	NA	NA	NA	MW	0	NA	NA	0	50	Bangladesh	01/07/2011	31/12/2011	2011.5	2012	2011 DHS	DHS	0	0.05810831	0.116119405	0.07817576	0.009538494	0.003434934	0.006929108
1	5050	15-19	NA	NA	NA	NA	36.19749586	26.34879461	9.848701246	34.77631903	NA	NA	NA	MW	0	NA	NA	0	178	Congo	01/09/2011	29/02/2012	2011.67	2012.16	2011-2012 DHS	DHS	0	NA	NA	NA	NA	NA	NA
1	5052	15-19	NA	NA	NA	NA	12.7	9.9	2.8	37.7	NA	NA	NA	MW	0	NA	NA	0	226	Equatorial Guinea	01/07/2011	30/11/2011	2011.5	2011.91	2011 DHS	DHS	0	NA	NA	NA	NA	NA	NA
1	5053	15-19	NA	NA	NA	NA	23.75639909	22.97067576	0.785723333	32.76666897	NA	NA	NA	MW	0	NA	NA	0	231	Ethiopia	01/12/2010	31/05/2011	2010.92	2011.41	2011 DHS	DHS	0	0.140866202	0.611687917	0.144280377	0.011976	6.36E-04	0.007120981
1	5054	15-19	NA	NA	NA	NA	24.94283354	15.55873587	9.384097665	41.36039518	NA	NA	NA	MW	0	NA	NA	0	266	Gabon	01/01/2012	31/05/2012	2012	2012.41	2012 DHS	DHS	0	NA	NA	NA	NA	NA	NA
1	5056	15-19	NA	NA	NA	NA	55.65718546	49.40092874	6.256256723	17.68698291	NA	NA	NA	MW	0	NA	NA	0	340	Honduras	01/09/2011	31/07/2012	2011.67	2012.58	2011-2012 DHS	DHS	0	0.07452166	0.142913266	0.108552875	0.005569983	0.00262185	0.004232101
1	5062	15-19	NA	NA	NA	NA	26.21178256	23.61649985	2.59528271	22.57904151	NA	NA	NA	MW	0	NA	NA	1	418	Lao People's Dem. Republic	01/09/2011	29/02/2012	2011.67	2012.16	2011-2012 DHS-MICS Special	DHS	0	NA	NA	NA	NA	NA	NA
1	5064	15-19	NA	NA	NA	NA	5.927292767	5.827706986	0.0996	23.17883773	NA	NA	NA	MW	0	NA	NA	0	508	Mozambique	01/06/2011	30/11/2011	2011.41	2011.91	2011 DHS	DHS	0	0.151555666	0.715527285	0.089794765	0.004755677	5.61E-05	0.010356792
1	5065	15-19	NA	NA	NA	NA	17.56646242	14.44502502	3.121437409	41.6286682	NA	NA	NA	MW	0	NA	NA	0	524	Nepal	01/01/2011	30/06/2011	2011	2011.49	2011 DHS	DHS	0	0.141875686	0.244870091	0.111483916	0.01150158	0.003707691	0.016174845
1	5066	15-19	NA	NA	NA	NA	32.87676907	30.64550679	2.231262283	6.36209757	NA	NA	NA	MW	0	NA	NA	0	646	Rwanda	01/09/2010	31/03/2011	2010.67	2011.24	2010 DHS	DHS	0	0.212005209	0.745314318	0.478869179	0.026607846	0.006715558	0.020033809
1	5070	15-19	NA	NA	NA	NA	2.368541259	1.814703244	0.553838015	12.78251767	NA	NA	NA	MW	0	NA	NA	0	762	Tajikistan	01/07/2012	30/09/2012	2012.5	2012.75	2012 DHS	DHS	0	0.468690009	0.996620813	0.182615809	0.004492949	0.001094102	0.008606538
1	5071	15-19	NA	NA	NA	NA	8.356631718	7.658243387	0.69838833	41.64110945	NA	NA	NA	MW	0	NA	NA	0	768	Togo	01/11/2013	30/04/2014	2013.83	2014.33	2013-2014 DHS-MICS	DHS	0	0.272442448	0.74641081	0.153635391	0.005136044	0.002584608	0.022135843
1	5072	15-19	NA	NA	NA	NA	13.94299564	13.09755565	0.845439988	31.33635999	NA	NA	NA	MW	0	NA	NA	0	800	Uganda	01/06/2011	31/12/2011	2011.41	2012	2011 DHS	DHS	0	NA	NA	NA	NA	NA	NA
1	5073	15-19	NA	NA	NA	NA	36.21430769	35.38459379	0.829713903	18.54128536	NA	NA	NA	MW	0	NA	NA	0	716	Zimbabwe	01/09/2010	31/03/2011	2010.67	2011.24	2010-2011 DHS	DHS	0	0.145417093	0.579575982	0.138789037	0.008614394	7.39E-04	0.009324107
1	5083	15-19	NA	NA	NA	Data pertain to fecund women.	48.6	NA	NA	NA	NA	+	NA	MW	0	NA	NA	0	28	Antigua and Barbuda	NA	NA	1988.25	1988.75	1988 CPS	CCPS	0	NA	NA	NA	NA	NA	NA
1	5142	15-19	NA	NA	NA	NA	44.5	43.8	0.7	NA	NA	NA	NA	MW	0	NA	NA	0	104	Myanmar	01/07/2007	09/01/2007	2007.5	2007.02	2007 FRHS	National survey	0	NA	NA	NA	NA	NA	NA
1	5143	15-19	NA	NA	NA	Data pertain to non-pregnant women.	41.9	23.3	18.6	NA	NA	+	NA	MW	0	NA	NA	0	516	Namibia	NA	NA	1989.25	1989.75	1989 Demographic and Health Survey	National survey	0	NA	NA	NA	NA	NA	NA
1	5146	18-19	NA	NA	NA	NA	96	NA	NA	NA	NA	NA	NA	MW	+	NA	NA	0	528	Netherlands	01/03/2008	01/08/2008	2008.16	2008.58	2008 FFS	National survey	0	NA	NA	NA	NA	NA	NA
1	5152	15-19	NA	NA	NA	NA	28.9	23.1	5.8	NA	NA	NA	NA	MW	0	NA	NA	0	591	Panama	01/10/1979	15/02/1980	1979.75	1980.12	1979 CPS	CPS	0	NA	NA	NA	NA	NA	NA
1	5153	15-19	NA	NA	NA	NA	22.6	19.7	2.9	NA	NA	NA	NA	MW	0	NA	NA	0	591	Panama	01/07/1984	28/04/1985	1984.5	1985.32	1984 RHS	RHS	0	NA	NA	NA	NA	NA	NA
1	5174	15-19	NA	NA	Excluding the Northern and Eastern Province.	NA	12.6	NA	NA	NA	Excluding the Northern and Eastern Province.	NA	NA	MW	0	NA	NA	0	144	Sri Lanka	NA	NA	1981.25	1981.75	1981-1982 Health Impact	National survey	0	NA	NA	NA	NA	NA	NA
1	5176	15-19	NA	NA	NA	NA	4.9	3.8269	1.0731	NA	NA	NA	NA	MW	0	NA	NA	0	762	Tajikistan	NA	NA	2007.25	2007.75	2007 LSMS	LSMS	0	NA	NA	NA	NA	NA	NA
1	5179	15-19	NA	NA	NA	NA	72.16721079	71.51165956	0.655551237	NA	NA	NA	NA	MW	0	NA	NA	0	764	Thailand	NA	NA	2006.25	2006.75	2006 RHS	RHS	0	NA	NA	NA	NA	NA	NA
1	5182	15-19	NA	NA	NA	NA	30	NA	NA	NA	NA	NA	NA	MW	0	NA	NA	0	780	Trinidad and Tobago	NA	NA	1970.25	1970.75	1970-1971 FS	National survey	0	NA	NA	NA	NA	NA	NA
1	5184	15-19	NA	Traditional methods include folk methods.	NA	NA	40.2	17.6	22.6	NA	NA	NA	NA	MW	0	NA	Including folk methods.	0	792	Turkey	NA	NA	2008.25	2008.75	2008 DHS	DHS	0	NA	NA	NA	NA	NA	NA
1	5212	15-19	NA	NA	Data pertain to pre-secession Northern Sudan.	NA	4	3	1	NA	Data pertain to pre-secession Northern Sudan.	NA	NA	MW	0	NA	NA	0	729	Sudan	NA	NA	1978.25	1978.75	1978-1979 WFS	National survey	0	NA	NA	NA	NA	NA	NA
1	5219	15-19	NA	NA	NA	NA	3.814713896	2.179836512	1.634877384	NA	NA	NA	NA	MW	0	NA	NA	0	729	Sudan	01/11/1989	31/05/1990	1989.83	1990.41	1989-1990 DHS	DHS	0	NA	NA	NA	NA	NA	NA
1	5220	15-19	NA	NA	Data pertain to pre-secession Northern Sudan.	NA	5.3	1.9	3.4	NA	Data pertain to pre-secession Northern Sudan.	NA	NA	MW	0	NA	NA	0	729	Sudan	NA	NA	1992.25	1992.75	1992-1993 MCH	PAPCHILD	0	NA	NA	NA	NA	NA	NA
1	5257	15-19	NA	NA	NA	NA	30.80274771	26.42615379	4.317831917	NA	NA	NA	NA	MW	0	NA	NA	0	704	Viet Nam	01/04/2010	01/04/2010	2010.25	2010.25	Annual APC	National survey	0	NA	NA	NA	NA	NA	NA
1	5274	15-19	NA	NA	NA	NA	5.757902383	4.970355329	0.787547054	31.35393333	NA	NA	NA	MW	0	NA	NA	0	686	Senegal	01/10/2010	30/04/2011	2010.75	2011.33	2010-2011 DHS-MICS	DHS	0	0.229205856	0.570579136	0.092883645	0.004646942	0.001090605	0.00833175
1	5275	15-19	NA	NA	NA	NA	74.6	NA	NA	NA	NA	NA	NA	MW	0	NA	NA	0	188	Costa Rica	01/06/2010	31/10/2010	2010.41	2010.83	2010 ESSR	National survey	0	NA	NA	NA	NA	NA	NA
1	5334	15-19	NA	NA	NA	NA	21.00131396	11.11285951	9.888454448	NA	NA	NA	NA	MW	0	NA	NA	1	368	Iraq	13/02/2011	18/03/2011	2011.12	2011.21	2011 MICS	MICS	0	NA	NA	NA	NA	NA	NA
1	5335	15-19	NA	NA	NA	NA	28.7	19.8	8.8	NA	NA	NA	NA	MW	0	NA	NA	0	608	Philippines	NA	NA	2011.25	2011.75	2011 FHS	National survey	0	NA	NA	NA	NA	NA	NA
1	5336	15-19	NA	NA	NA	NA	11.4	6.8	4.6	NA	NA	NA	NA	MW	0	NA	NA	0	356	India	01/12/2007	30/12/2008	2007.92	2008.99	2007-2008 DLHS	National survey	0	NA	NA	NA	NA	NA	NA
1	5339	15-19	NA	NA	NA	NA	27.52733692	21.81957565	5.707761271	12.49497542	NA	NA	NA	MW	0	NA	NA	0	400	Jordan	01/09/2012	31/12/2012	2012.67	2013	2012 DHS	DHS	0	0.271045749	0.309450276	0.32671401	0.047505309	0.008116521	0.029739755
1	5353	15-19	NA	NA	NA	NA	37.8	35.2	2.6	10.5	NA	NA	NA	MW	0	NA	NA	0	504	Morocco	01/11/2010	31/03/2011	2010.83	2011.24	2011 ENPSF	DHS	0	NA	NA	NA	NA	NA	NA
1	5355	15-19	NA	NA	NA	NA	4.829464141	4.417770369	0.411693772	NA	NA	NA	NA	MW	0	NA	NA	1	729	Sudan	01/07/2010	30/11/2010	2010.5	2010.91	2010 MICS-HHS	National survey	0	NA	NA	NA	NA	NA	NA
1	5373	15-19	NA	NA	NA	NA	60.65565134	44.38485319	16.27079814	26.53216154	NA	NA	NA	MW	0	NA	NA	0	604	Peru	01/03/2011	31/12/2011	2011.16	2012	2011 DHS	DHS	0	0.125327419	0.177955324	0.2068062	0.015536528	0.012748823	0.016240556
1	5399	15-19	NA	NA	NA	NA	12.5	8	4.5	13	NA	NA	NA	MW	0	NA	NA	0	760	Syrian Arab Republic	NA	NA	2009.25	2009.75	2009 FHS	PAPFAM	0	NA	NA	NA	NA	NA	NA
1	5400	15-19	NA	NA	NA	NA	69.6	68.4	1.2	NA	NA	NA	NA	MW	0	NA	NA	0	764	Thailand	NA	NA	2009.25	2009.75	2009 RHS	RHS	0	NA	NA	NA	NA	NA	NA
1	5413	15-19	NA	NA	NA	NA	7.025405314	5.916530548	1.108874767	13.07919643	NA	NA	NA	MW	0	NA	NA	0	562	Niger	01/02/2012	30/06/2012	2012.08	2012.49	2012 DHS-MICS	DHS	0	0.15753767	0.336609196	0.103594253	0.00476751	8.37E-04	0.005546195
1	5422	15-19	NA	NA	NA	NA	2.774929596	2.550949754	0.223979843	23.37395577	NA	NA	NA	MW	0	NA	NA	0	324	Guinea	01/06/2012	31/10/2012	2012.42	2012.83	2012 DHS	DHS	0	0.27102285	0.719870862	0.117489478	0.003795558	3.95E-04	0.008635877
1	5430	18-19	NA	Modern methods include some cases of sterilisation for non-contraceptive reasons.	NA	NA	69.2			NA	NA	NA	NA	MW	+	NA	NA	0	250	France	26/09/2005	03/12/2005	2005.73	2005.92	2005 GGS	GGS	0	NA	NA	NA	NA	NA	NA
1	5433	18-19	NA	Modern methods include some cases of sterilisation for non-contraceptive reasons.	NA	NA	23.1	3.8	19.2	NA	NA	NA	NA	MW	+	NA	NA	0	268	Georgia	01/03/2006	30/05/2006	2006.16	2006.41	2006 GGS	GGS	0	NA	NA	NA	NA	NA	NA
1	5434	18-19	NA	Modern methods include some cases of sterilisation for non-contraceptive reasons.	NA	NA	93.3			NA	NA	NA	NA	MW	+	NA	NA	0	276	Germany	22/02/2005	12/05/2005	2005.14	2005.36	2005 GGS	GGS	0	NA	NA	NA	NA	NA	NA
1	5438	18-19	NA	Modern methods include some cases of sterilisation for non-contraceptive reasons.	NA	NA	63.2	36.8	26.3	NA	NA	NA	NA	MW	+	NA	NA	0	440	Lithuania	01/04/2006	30/12/2006	2006.25	2006.99	2006 GGS	GGS	0	NA	NA	NA	NA	NA	NA
1	5444	15-19	NA	NA	NA	NA	1.7	0	1.7	34.5	NA	NA	NA	MW	0	NA	NA	0	296	Kiribati	18/09/2009	18/12/2009	2009.71	2009.96	2009 DHS	DHS	0	NA	NA	NA	NA	NA	NA
1	5447	15-19	NA	NA	NA	NA	2.108914949	1.151751978	0.957162971	13.05380342	NA	NA	NA	MW	0	NA	NA	0	566	Nigeria	01/02/2013	30/06/2013	2013.08	2013.49	2013 DHS	DHS	0	0.244749179	0.261251696	0.073651635	0.001703834	0.00115482	0.004595
1	5450	15-19	NA	Traditional methods include folk methods.	NA	NA	28	25.6	2.4	NA	NA	NA	NA	MW	0	NA	Including folk methods.	1	548	Vanuatu	NA	NA	2013.25	2013.75	2013 DHS-MICS	National survey	0	NA	NA	NA	NA	NA	NA
1	5451	15-19	NA	NA	NA	NA	25.64108872	23.99999316	1.641095556	56.56954357	NA	NA	NA	MW	0	NA	NA	0	332	Haiti	01/01/2012	30/06/2012	2012	2012.49	2012 DHS-MICS	DHS	0	0.161389985	0.453661209	0.152497199	0.017839448	0.005311174	0.016877917
1	5453	15-19	NA	NA	NA	NA	20.4	16.2	4.2	NA	NA	NA	NA	MW	0	NA	NA	0	268	Georgia	01/10/2010	28/02/2011	2010.75	2011.16	2010 RHS	RHS	0	NA	NA	NA	NA	NA	NA
1	5455	18-19	NA	Modern methods include some cases of sterilisation for non-contraceptive reasons.	NA	NA	69.2	61.5	7.7	NA	NA	NA	NA	MW	+	NA	NA	0	203	Czechia	NA	NA	2005.25	2005.75	2005 GGS	GGS	0	NA	NA	NA	NA	NA	NA
1	5457	15-19	NA	NA	NA	NA	5.150898219			9.651630429	NA	NA	NA	MW	0	NA	NA	0	417	Kyrgyzstan	01/08/2012	31/12/2012	2012.58	2013	2012 DHS	DHS	0	0.348516679	NaN	0.25642043	0.011682705	0	0.008180153
1	5458	15-19	NA	NA	NA	NA	48.05343158	47.64165253	0.411779049	6.718995275	NA	NA	NA	MW	0	NA	NA	0	360	Indonesia	01/05/2012	31/07/2012	2012.33	2012.58	2012 DHS Special	National survey	0	NA	NA	NA	NA	NA	NA
1	5459	15-19	NA	NA	NA	NA	19.6557217	13.45875234	6.196969358	47.39039876	NA	NA	NA	MW	0	NA	NA	0	174	Comoros	01/08/2012	31/12/2012	2012.58	2013	2012 DHS-MICS	DHS	0	0.231284427	0.382526865	0.174010136	0.017636796	0.006142492	0.015294675
1	5460	15-19	NA	NA	NA	NA	6.71562647	6.500906757	0.214719712	23.32401588	NA	NA	NA	MW	0	NA	NA	0	466	Mali	13/11/2012	05/02/2013	2012.87	2013.1	2012-2013 DHS	DHS	0	NA	NA	NA	NA	NA	NA
1	5461	15-19	NA	NA	NA	NA	10.3246073	6.889517819	3.435089481	14.88493958	NA	NA	NA	MW	0	NA	NA	0	586	Pakistan	01/10/2012	30/04/2013	2012.75	2013.33	2012-2013 DHS	DHS	0	0.235322144	0.287954366	0.176083811	0.008702646	0.006726591	0.010158905
1	5462	15-19	NA	NA	NA	NA	3.311254587	2.199266415	1.111988172	16.87310286	NA	NA	NA	MW	0	NA	NA	0	270	Gambia	01/02/2013	30/04/2013	2013.08	2013.33	2013 DHS	DHS	0	NA	NA	NA	NA	NA	NA
1	5469	15-19	NA	NA	NA	NA	13.20428828			46.59798946	NA	NA	NA	MW	0	NA	NA	0	430	Liberia	01/03/2013	31/07/2013	2013.16	2013.58	2013 DHS	DHS	0	0.26270493	NaN	0.151826413	0.010350189	0	0.016261899
1	5490	15-19	NA	NA	NA	NA	3.303940713	2.84542172	0.458518993	31.13790805	NA	NA	NA	MW	0	NA	NA	0	686	Senegal	01/09/2012	30/06/2013	2012.67	2013.49	2012-2013 DHS	DHS	0	0.287337065	0.77677859	0.15591912	0.003004236	0.001057951	0.021480848
1	5503	15-19	NA	NA	NA	NA	28.59342722	28.50419974	0.0892	29.78618083	NA	NA	NA	MW	0	NA	NA	0	231	Ethiopia	01/01/2014	31/03/2014	2014	2014.24	2014 PMA-R1	PMA	0	0.201047217	1.01224863	0.261765878	0.025707417	1.27E-04	0.015831821
1	5549	15-19	NA	NA	NA	NA	3.5	2.9	0.6	NA	NA	NA	NA	MW	0	NA	NA	0	566	Nigeria	01/07/2012	31/12/2012	2012.5	2013	2012 NARHS	National survey	0	NA	NA	NA	NA	NA	NA
1	5550	15-19	NA	NA	NA	NA	44.7	NA	NA	24.6	NA	NA	NA	MW	0	NA	NA	0	484	Mexico	01/07/2009	10/07/2009	2009.5	2009.52	2009 ENADID	National survey	0	NA	NA	NA	NA	NA	NA
1	5551	15-19	NA	NA	NA	NA	50	42	8	NA	NA	NA	NA	MW	0	NA	NA	0	643	Russian Federation	NA	NA	2011.25	2011.75	2011 RHS	RHS	0	NA	NA	NA	NA	NA	NA
1	5555	15-19	NA	NA	NA	NA	66.55878328	50.60194028	15.956843	19.343142	NA	NA	NA	MW	0	NA	NA	0	604	Peru	01/03/2012	31/12/2012	2012.16	2013	2012 DHS	DHS	0	0.12061212	0.148627427	0.181336298	0.012847325	0.009088312	0.010863113
1	5556	15-19	NA	NA	NA	NA	7.757613444			30.76404836	NA	NA	NA	MW	0	NA	NA	0	694	Sierra Leone	01/06/2013	31/10/2013	2013.41	2013.83	2013 DHS	DHS	0	0.160812454	NaN	0.094646648	0.005156892	0	0.008790968
1	5557	15-19	NA	NA	NA	NA	46.9	17.6	29.2	12.4	NA	NA	NA	MW	0	NA	NA	0	792	Turkey	NA	NA	2013.25	2013.75	2013 NDHS	National survey	0	NA	NA	NA	NA	NA	NA
1	5559	15-19	NA	NA	Data pertain to nationals of the country.	NA	19.3	11.4	7.9	47	Data pertain to nationals of the country.	NA	NA	MW	0	NA	NA	0	512	Oman	01/07/2007	31/05/2008	2007.5	2008.41	2008 RHS	National survey	0	NA	NA	NA	NA	NA	NA
1	5560	15-19	NA	NA	NA	NA	2.349136801	1.014921847	1.334214954	NA	NA	NA	NA	MW	0	NA	NA	1	728	South Sudan	29/03/2010	30/06/2010	2010.24	2010.49	2010 HHS-II	National survey	0	NA	NA	NA	NA	NA	NA
1	5561	15-19	NA	NA	NA	NA	60.92039785	57.92935046	2.991047391	21.62091454	NA	NA	NA	MW	0	NA	NA	1	222	El Salvador	01/03/2014	28/09/2014	2014.16	2014.74	2014 MICS	MICS	0	NA	NA	NA	NA	NA	NA
1	5562	15-19	NA	NA	NA	NA	56	NA	NA	NA	NA	NA	NA	MW	0	NA	NA	0	862	Venezuela (Bolivarian Republic of)	NA	NA	2010.25	2010.75	2010 ENDEVE	National survey	0	NA	NA	NA	NA	NA	NA
1	5563	15-19	NA	NA	NA	NA	15.58703775	9.8611381	5.725899649	12.49456642	NA	NA	NA	MW	0	NA	NA	1	275	State of Palestine	01/11/2013	30/04/2014	2013.83	2014.33	2014 MICS	MICS	0	NA	NA	NA	NA	NA	NA
1	5564	15-19	NA	NA	NA	NA	2.905851249	2.254436821	0.651414428	22.47162777	NA	NA	NA	MW	0	NA	NA	0	148	Chad	01/10/2014	30/04/2015	2014.75	2015.33	2014-2015 DHS-MICS	DHS	0	0.208162884	0.673262106	0.07423794	0.002628803	9.97E-04	0.004817172
1	5565	15-19	NA	NA	NA	NA	14.85485634	9.955052327	4.899804017	22.47135601	NA	NA	NA	MW	0	NA	NA	0	356	India	01/01/2015	31/12/2016	2015	2017	2015-2016 NFHS	DHS	0	NA	NA	NA	NA	NA	NA
1	5566	15-19	NA	NA	NA	NA	29.0643545	20.15528322	8.909071271	14.94075268	NA	NA	NA	MW	0	NA	NA	0	116	Cambodia	01/06/2014	31/12/2014	2014.41	2015	2014 DHS	DHS	0	0.145082915	0.294507752	0.159283493	0.01284663	0.013610811	0.009342921
1	5568	15-19	NA	NA	NA	NA	13			NA	NA	NA	NA	MW	0	NA	NA	0	262	Djibouti	17/06/2012	05/10/2012	2012.46	2012.76	2012 FHS	PAPFAM	0	NA	NA	NA	NA	NA	NA
1	5569	15-19	NA	NA	NA	NA	72.3	70.6	1.7	9.2	NA	NA	NA	MW	0	NA	NA	0	558	Nicaragua	01/06/2011	28/11/2012	2011.41	2012.91	2011-2012 NDHS	National survey	0	NA	NA	NA	NA	NA	NA
1	5576	15-19	NA	NA	NA	NA	29.36556727	25.30630437	4.048811976	NA	NA	NA	NA	MW	0	NA	NA	0	704	Viet Nam	01/04/2011	20/04/2011	2011.25	2011.3	Annual APC	National survey	0	NA	NA	NA	NA	NA	NA
1	5577	15-19	NA	NA	NA	NA	17.36045186	15.06882141	2.29163045	19.27651994	NA	NA	NA	MW	0	NA	NA	1	417	Kyrgyzstan	24/04/2014	30/06/2014	2014.31	2014.49	2014 MICS	MICS	0	NA	NA	NA	NA	NA	NA
1	5579	15-19	NA	NA	NA	NA	29.0997301	27.63567783	1.464052268	36.39198417	NA	NA	NA	MW	0	NA	NA	1	496	Mongolia	30/09/2013	28/12/2013	2013.75	2013.99	2013 MICS	MICS	0	NA	NA	NA	NA	NA	NA
1	5580	15-19	NA	NA	NA	NA	38.38663587	29.42384474	8.962791127	10.75145407	NA	NA	NA	MW	0	NA	NA	1	704	Viet Nam	01/12/2013	31/03/2014	2013.92	2014.24	2013-2014 MICS	MICS	0	NA	NA	NA	NA	NA	NA
1	5582	15-19	NA	NA	NA	NA	39.65016109	39.2488272	0.401333889	22.55617683	NA	NA	NA	MW	0	NA	NA	1	454	Malawi	01/11/2013	28/04/2014	2013.83	2014.32	2013-2014 MICS	MICS	0	NA	NA	NA	NA	NA	NA
1	5585	15-19	NA	NA	NA	NA	48.53912538	48.38230265	0.156822733	10.99935113	NA	NA	NA	MW	0	NA	NA	1	716	Zimbabwe	15/02/2014	15/04/2014	2014.12	2014.28	2014 MICS	MICS	0	NA	NA	NA	NA	NA	NA
1	5589	15-19	NA	NA	NA	NA	94.3	88.1	6.2	NA	NA	NA	NA	MW	0	NA	NA	0	250	France	01/06/2010	31/01/2011	2010.41	2011.08	2010 EnquÃªte Fecond	National survey	0	NA	NA	NA	NA	NA	NA
1	5591	15-19	NA	Traditional methods include folk methods.	NA	NA	49.5	46	3.5	NA	NA	NA	NA	MW	0	NA	Including folk methods.	0	214	Dominican Republic	26/12/2009	31/01/2010	2009.98	2010.08	2009-2010 ENHOGAR-MICS	National survey	0	NA	NA	NA	NA	NA	NA
1	5593	15-19	NA	NA	NA	NA	6.402225945	5.902853658	0.499372287	24.79646286	NA	NA	NA	MW	0	NA	NA	1	729	Sudan	10/09/2014	06/11/2014	2014.69	2014.85	2014 MICS	MICS	0	NA	NA	NA	NA	NA	NA
1	5595	15-19	NA	NA	NA	NA	48.47785452	46.61266318	1.865191339	17.39364113	NA	NA	NA	MW	0	NA	NA	1	50	Bangladesh	01/12/2012	30/04/2013	2012.92	2013.33	2012-2013 MICS	MICS	0	NA	NA	NA	NA	NA	NA
1	5602	15-19	NA	NA	NA	NA	15.06615583			65.78687708	NA	NA	NA	MW	0	NA	NA	0	288	Ghana	01/07/2013	30/11/2013	2013.5	2013.91	2013 PMA-R1	PMA	0	0.353986917	NaN	0.243823309	0.028376177	0	0.046682685
1	5603	18-19	NA	NA	NA	NA	70.5			NA	NA	NA	NA	MW	+	NA	NA	0	36	Australia	24/08/2005	10/03/2006	2005.64	2006.19	2005-2006 HILDA	National survey	0	NA	NA	NA	NA	NA	NA
1	5612	15-19	NA	NA	NA	NA	12.50705933	5.343640947	7.163418381	30.75866187	NA	NA	NA	MW	0	NA	NA	0	180	Dem. Rep. of the Congo	01/08/2013	28/02/2014	2013.58	2014.16	2013-2014 DHS	DHS	0	0.198957417	0.180840155	0.114525882	0.00437636	0.007642177	0.011869466
1	5613	15-19	NA	NA	NA	NA	36.52693908	20.64752294	15.87941614	28.70864287	NA	NA	NA	MW	0	NA	NA	0	608	Philippines	01/08/2013	30/09/2013	2013.58	2013.75	2013 DHS	DHS	0	0.14030567	0.190477759	0.141241348	0.02310716	0.018059196	0.014440047
1	5615	15-19	NA	NA	NA	NA	13.20684846	9.52414862	3.682699839	29.3845636	NA	NA	NA	MW	0	NA	NA	0	887	Yemen	01/09/2013	30/11/2013	2013.67	2013.91	2013 DHS	DHS	0	0.111537378	0.324375641	0.097700838	0.008167122	0.001912034	0.010275964
1	5616	15-19	NA	NA	NA	NA	37.16891818	32.18353473	4.985383447	31.67770301	NA	NA	NA	MW	0	NA	NA	0	516	Namibia	01/05/2013	30/09/2013	2013.33	2013.75	2013 DHS	DHS	0	0.234122205	0.776332157	0.318463131	0.018467221	0.007629143	0.012366887
1	5635	15-19	NA	NA	NA	NA	7.7	7.3	0.4	31.1	NA	NA	NA	MW	0	NA	NA	1	384	CÃ´te d'Ivoire	01/07/2016	31/08/2016	2016.5	2016.66	2016 MICS	MICS	0	NA	NA	NA	NA	NA	NA
1	5637	15-19	NA	NA	NA	NA	7.685320821	7.126898469	0.558422352	28.2887129	NA	NA	NA	MW	0	NA	NA	1	624	Guinea-Bissau	01/03/2014	31/07/2014	2014.16	2014.58	2014 MICS	MICS	0	NA	NA	NA	NA	NA	NA
1	5641	15-19	NA	NA	NA	NA	24.22183785	15.69546419	8.526373661	15.9916899	NA	NA	NA	MW	0	NA	NA	1	120	Cameroon	NA	NA	2014.25	2014.75	2014 MICS	MICS	0	NA	NA	NA	NA	NA	NA
1	5642	15-19	NA	NA	NA	NA	29.88782656	19.67925927	10.20856728	41.37264901	NA	NA	NA	MW	0	NA	NA	1	178	Congo	01/11/2014	28/02/2015	2014.83	2015.16	2014-2015 MICS	MICS	0	NA	NA	NA	NA	NA	NA
1	5644	15-19	NA	NA	NA	NA	29.95389062	27.58373224	2.370158376	42.23695031	NA	NA	NA	MW	0	NA	NA	1	678	Sao Tome and Principe	NA	NA	2014.25	2014.75	2014 MICS	MICS	0	NA	NA	NA	NA	NA	NA
1	5659	15-19	NA	NA	NA	NA	37.46041899	35.7935153	1.666903697	25.09066523	NA	NA	NA	MW	0	NA	NA	0	894	Zambia	01/08/2013	30/04/2014	2013.58	2014.33	2013-2014 DHS	DHS	0	0.106741995	0.345270499	0.118636401	0.010061208	0.001909158	0.007038221
1	5665	15-19	NA	NA	NA	NA	11.20995815	8.323802227	2.886155922	34.16679074	NA	NA	NA	MW	0	NA	NA	1	204	Benin	01/05/2014	01/05/2014	2014.33	2014.33	2014 MICS	MICS	0	NA	NA	NA	NA	NA	NA
1	5666	15-19	NA	NA	NA	NA	28.63127221	26.93422062	1.697051589	13.33831129	NA	NA	NA	MW	0	NA	NA	1	398	Kazakhstan	15/09/2015	15/11/2015	2015.7	2015.87	2015 MICS	MICS	0	NA	NA	NA	NA	NA	NA
1	5669	15-19	NA	NA	NA	NA	69.2	68.2	1	13	NA	NA	NA	MW	0	NA	NA	1	764	Thailand	15/11/2015	15/03/2016	2015.87	2016.2	2015-2016 MICS	MICS	0	NA	NA	NA	NA	NA	NA
1	5672	15-19	NA	NA	NA	NA	19.20465175	16.57822318	2.626428569	47.66422733	NA	NA	NA	MW	0	NA	NA	1	524	Nepal	01/02/2014	30/06/2014	2014.08	2014.49	2014 MICS	MICS	0	NA	NA	NA	NA	NA	NA
1	5673	15-19	NA	NA	NA	NA	59.87100695			22.32466282	NA	NA	NA	MW	0	NA	NA	1	192	Cuba	01/02/2014	28/09/2014	2014.08	2014.74	2014 MICS	MICS	0	NA	NA	NA	NA	NA	NA
1	5674	15-19	NA	NA	NA	NA	52.44345353	51.22950549	1.213948046	24.53086558	NA	NA	NA	MW	0	NA	NA	1	214	Dominican Republic	01/06/2014	31/08/2014	2014.41	2014.66	2014 MICS	MICS	0	NA	NA	NA	NA	NA	NA
1	5675	15-19	NA	NA	NA	NA	12.90393338	12.4124036	0.491529785	61.93826898	NA	NA	NA	MW	0	NA	NA	1	328	Guyana	NA	NA	2014.25	2014.75	2014 MICS	MICS	0	NA	NA	NA	NA	NA	NA
1	5676	15-19	NA	NA	NA	NA	5.7			36.3	NA	NA	NA	MW	0	NA	NA	1	324	Guinea	NA	NA	2016.25	2016.75	2016 MICS	MICS	0	NA	NA	NA	NA	NA	NA
1	5677	15-19	NA	NA	NA	NA	8.067294264	7.646551307	0.420742958	28.0329598	NA	NA	NA	MW	0	NA	NA	1	466	Mali	20/07/2015	21/10/2015	2015.55	2015.8	2015 MICS	MICS	0	NA	NA	NA	NA	NA	NA
1	5679	15-19	NA	NA	NA	NA	15.5	14	0.3	28.6	NA	NA	NA	MW	0	NA	NA	1	694	Sierra Leone	NA	NA	2017.25	2017.75	2017 MICS	MICS	0	NA	NA	NA	NA	NA	NA
1	5689	15-19	NA	NA	NA	NA	7.755602846	5.967131168	1.788471677	20.9008662	NA	NA	NA	MW	0	NA	NA	0	4	Afghanistan	01/06/2015	29/02/2016	2015.41	2016.16	2015 DHS	DHS	0	0.164210891	0.524633411	0.092054017	0.006207341	0.009298796	0.008032885
1	5710	15-19	NA	NA	NA	NA	54.46284389	51.7066141	2.756229785	27.26619976	NA	NA	NA	MW	0	NA	NA	0	214	Dominican Republic	01/07/2013	31/10/2013	2013.5	2013.83	2013 DHS	DHS	0	0.135471264	0.459989648	0.20266821	0.019205714	0.003462148	0.017416131
1	5711	15-19	NA	NA	NA	NA	20.51859622	18.88494292	1.633653294	9.047382853	NA	NA	NA	MW	0	NA	NA	0	818	Egypt	01/04/2014	30/06/2014	2014.25	2014.49	2014 DHS	DHS	0	0.115534627	0.32646948	0.142693232	0.006334902	8.66E-04	0.00469313
1	5721	15-19	NA	NA	NA	NA	40.97393928			20.11863662	NA	NA	NA	MW	0	NA	NA	0	404	Kenya	01/07/2014	23/07/2014	2014.5	2014.56	2014 PMA-R1	PMA	0	0.255323416	NaN	0.364740341	0.025619283	0	0.022863251
1	5722	15-19	NA	NA	NA	NA	22.33530972	19.07461204	3.260697679	35.35890781	NA	NA	NA	MW	0	NA	NA	0	800	Uganda	01/08/2015	30/09/2015	2015.58	2015.75	2015 PMA-R3	PMA	0	0.220495346	0.620397339	0.220825807	0.024709489	0.004087654	0.020704724
1	5725	15-19	NA	NA	NA	NA	34.86037747	29.84970713	5.010670339	NA	NA	NA	NA	MW	0	NA	NA	0	704	Viet Nam	NA	NA	2013.25	2013.75	Annual APC	National survey	0	NA	NA	NA	NA	NA	NA
1	5731	15-19	NA	NA	NA	NA	2.030637125			17.20402712	NA	NA	NA	MW	0	NA	NA	1	795	Turkmenistan	15/09/2015	15/01/2016	2015.7	2016.04	2015 MICS	MICS	0	NA	NA	NA	NA	NA	NA
1	5752	15-19	NA	NA	NA	NA	32.41280856	28.01628645	4.396522112	NA	NA	NA	NA	MW	0	NA	NA	0	704	Viet Nam	01/07/2012	20/04/2012	2012.5	2012.3	Annual APC	National survey	0	NA	NA	NA	NA	NA	NA
1	5761	15-19	NA	NA	NA	NA	39	37.4	1.6	40.8	NA	NA	NA	MW	0	NA	NA	1	84	Belize	19/10/2015	31/01/2016	2015.8	2016.08	2015-2016 MICS	MICS	0	NA	NA	NA	NA	NA	NA
1	5764	15-19	NA	NA	NA	NA	11.6854045			26.18727564	NA	NA	NA	MW	0	NA	NA	0	854	Burkina Faso	01/09/2014	31/10/2014	2014.67	2014.83	2015 PMA-R2	PMA	0	0.273870856	NaN	0.300729159	0.019109545	0	0.042860671
1	5765	15-19	NA	NA	NA	NA	31.05252151			24.54218385	NA	NA	NA	MW	0	NA	NA	0	231	Ethiopia	01/10/2014	31/12/2014	2014.75	2015	2014 PMA-R2	PMA	0	0.161445328	NaN	0.334108991	0.026095511	0	0.020032133
1	5766	15-19	NA	NA	NA	NA	16.99291407	14.30764242	1.308807058	57.46328609	NA	NA	NA	MW	0	NA	NA	0	288	Ghana	01/02/2014	31/05/2014	2014.08	2014.41	2014 PMA-R2	PMA	0	0.342082456	0.107917212	0.209238468	0.021924965	0.001630386	0.02271566
1	5767	15-19	NA	NA	NA	NA	19.7312741	15.67874946	4.052524638	52.02091867	NA	NA	NA	MW	0	NA	NA	0	288	Ghana	01/09/2014	31/12/2014	2014.67	2015	2014 PMA-R3	PMA	0	0.314360568	0.904753143	0.293265249	0.026382662	0.022770538	0.048158736
1	5768	15-19	NA	NA	NA	NA	40.15046757	39.1812355	0.96923207	20.81158017	NA	NA	NA	MW	0	NA	NA	0	404	Kenya	01/06/2015	31/07/2015	2015.41	2015.58	2015 PMA-R3	PMA	0	0.229678975	1.014916319	0.320478798	0.032901948	0.009763318	0.020967284
1	5769	15-19	NA	NA	NA	NA	35.27383984			28.88315515	NA	NA	NA	MW	0	NA	NA	0	426	Lesotho	01/09/2014	31/12/2014	2014.67	2015	2014 DHS	DHS	0	0.155596319	NaN	0.168377239	0.016607252	0	0.011687278
1	5770	15-19	NA	NA	NA	NA	24.4	20.5	3.9	NA	NA	NA	NA	MW	0	NA	NA	0	458	Malaysia	01/09/2014	31/01/2015	2014.67	2015.08	2014 PFS	National survey	0	NA	NA	NA	NA	NA	NA
1	5775	15-19	NA	NA	Excluding some areas in the Balochistan province.	NA	29	NA	NA	NA	Excluding some areas in the Balochistan province.	NA	NA	MW	0	NA	NA	0	586	Pakistan	01/07/2011	30/06/2012	2011.5	2012.49	2011-2012 LSMS	LSMS	0	NA	NA	NA	NA	NA	NA
1	5778	15-19	NA	NA	NA	NA	18.5640734	16.68086887	1.88320453	50.71689777	NA	NA	NA	MW	0	NA	NA	0	288	Ghana	01/09/2014	31/12/2014	2014.67	2015	2014 DHS	DHS	0	0.31469255	0.802584527	0.249703951	0.026830847	0.003974896	0.036071078
1	5779	15-19	NA	NA	NA	NA	12.4000593	12.26282188	0.137237425	20.95307124	NA	NA	NA	MW	0	NA	NA	0	686	Senegal	01/01/2014	31/10/2014	2014	2014.83	2014 DHS	DHS	0	0.41815665	0.763090079	0.161803399	0.019094727	3.81E-04	0.014442434
1	5780	15-19	NA	NA	NA	NA	40.18679076	36.7930432	3.393747565	9.978090082	NA	NA	NA	MW	0	NA	NA	0	404	Kenya	01/05/2014	31/10/2014	2014.33	2014.83	2014 DHS	DHS	0	NA	NA	NA	NA	NA	NA
1	5787	15-19	NA	NA	NA	NA	51.16985735	46.7407925	4.429064849	17.13252453	NA	NA	NA	MW	0	NA	NA	0	50	Bangladesh	01/06/2014	30/11/2014	2014.41	2014.91	2014 DHS	DHS	0	0.054081356	0.145508763	0.079581395	0.011283486	0.004991659	0.008936275
1	5788	15-19	NA	NA	NA	NA	64.39533534	60.46019076	3.93514458	19.29303788	NA	NA	NA	MW	0	NA	NA	0	170	Colombia	01/02/2015	31/03/2016	2015.08	2016.25	2015 DHS	DHS	0	0.091039414	0.192956483	0.14931658	0.006155915	0.002506953	0.005860229
1	5790	15-19	NA	NA	NA	NA	40.11209778	31.26945772	8.842640059	21.91132274	NA	NA	NA	MW	0	NA	NA	0	320	Guatemala	01/10/2014	30/06/2015	2014.75	2015.49	2014-2015 ENSMI	DHS	0	0.08242239	0.13165354	0.097340485	0.008016725	0.003412222	0.004714548
1	5794	15-19	NA	NA	NA	NA	15.4	14.1	1.3	26.1	NA	NA	NA	MW	0	NA	NA	0	508	Mozambique	01/05/2015	31/10/2015	2015.33	2015.83	2015 AIS	National survey	0	NA	NA	NA	NA	NA	NA
1	5796	15-19	NA	NA	NA	NA	35.28549304	32.81894797	2.466545072	3.628565882	NA	NA	NA	MW	0	NA	NA	0	646	Rwanda	01/11/2014	30/04/2015	2014.83	2015.33	2014-2015 DHS	DHS	0	0.19205977	0.7338495	0.599814018	0.032693144	0.008394412	0.012026765
1	5798	15-19	NA	NA	NA	NA	45.82950025	44.92647005	0.903030193	12.63865264	NA	NA	NA	MW	0	NA	NA	0	716	Zimbabwe	01/07/2015	31/12/2015	2015.5	2016	2015 DHS	DHS	0	0.117398328	0.598168539	0.185465952	0.011976645	7.01E-04	0.005563735
1	5805	15-19	NA	NA	NA	NA	7.961757179	7.598629676	0.363127503	42.98467685	NA	NA	NA	MW	0	NA	NA	0	24	Angola	01/11/2015	29/02/2016	2015.83	2016.16	2015-2016 DHS	DHS	0	0.220166758	0.682563067	0.10050635	0.009643379	9.47E-04	0.009633497
1	5808	15-19	NA	NA	NA	NA	31.94181335	31.83477313	0.107040221	20.54706124	NA	NA	NA	MW	0	NA	NA	0	231	Ethiopia	01/01/2016	30/06/2016	2016	2016.49	2016 DHS	DHS	0	0.133005654	0.965457068	0.16405201	0.022298888	1.79E-04	0.010788821
1	5825	15-19	NA	NA	NA	NA	25.73536602	24.81057986	0.924786163	55.54742223	NA	NA	NA	MW	0	NA	NA	0	332	Haiti	01/11/2016	30/04/2017	2016.83	2017.33	2016 DHS	DHS	0	NA	NA	NA	NA	NA	NA
1	5826	15-19	NA	Traditional methods include folk methods.	NA	NA	65.9	46.9	19	18.4	NA	NA	NA	MW	0	NA	Including folk methods.	0	604	Peru	01/03/2013	30/11/2013	2013.16	2013.91	2013 DHS	DHS	0	NA	NA	NA	NA	NA	NA
1	5919	15-19	NA	NA	NA	NA	2			32.5	NA	NA	NA	MW	0	NA	NA	0	232	Eritrea	14/01/2010	07/07/2010	2010.04	2010.51	2010 PHS	National survey	0	NA	NA	NA	NA	NA	NA
1	5952	15-19	NA	NA	NA	NA	38.06609767	37.49135577	0.574741903	22.22462307	NA	NA	NA	MW	0	NA	NA	0	454	Malawi	01/10/2015	29/02/2016	2015.75	2016.16	2015-2016 DHS	DHS	0	0.075642196	0.507919613	0.107098202	0.006424114	8.90E-04	0.004702794
1	5954	15-19	NA	Traditional methods include folk methods.	NA	NA	60.7	42.9	17.8	22	NA	NA	NA	MW	0	NA	Including folk methods.	0	604	Peru	01/03/2014	31/12/2014	2014.16	2015	2014 DHS	DHS	0	NA	NA	NA	NA	NA	NA
1	5955	15-19	NA	NA	NA	NA	6.185787773	5.525670383	0.66011739	24.32790335	NA	NA	NA	MW	0	NA	NA	0	686	Senegal	01/01/2015	31/10/2015	2015	2015.83	2015 DHS	DHS	0	0.206986713	0.577055842	0.124359496	0.005995155	0.001645737	0.007543139
1	5957	15-19	NA	NA	NA	NA	14.69177842	13.31355622	1.378222196	22.97104365	NA	NA	NA	MW	0	NA	NA	0	834	United Republic of Tanzania	01/08/2015	29/02/2016	2015.58	2016.16	2015-2016 DHS	DHS	0	NA	NA	NA	NA	NA	NA
1	5970	15-19	NA	NA	NA	NA	59.1	31.8	27.3	NA	NA	NA	NA	MW	0	NA	NA	0	480	Mauritius	01/07/2014	30/09/2014	2014.5	2014.75	2014 CPS	CPS	0	NA	NA	NA	NA	NA	NA
1	5993	15-19	NA	NA	NA	NA	10.2505926			34.76524627	NA	NA	NA	MW	0	NA	NA	0	854	Burkina Faso	01/07/2014	31/12/2014	2014.5	2015	2014 PMA-R1	PMA	0	0.314964542	NaN	0.169637954	0.0160428	0	0.029691952
1	5994	15-19	NA	NA	NA	NA	51.89406861			9.112113001	NA	NA	NA	MW	0	NA	NA	0	360	Indonesia	01/07/2015	31/08/2015	2015.5	2015.66	2015 PMA-R1	PMA	0	0.155749609	NaN	0.306329738	0.02237089	0	0.011309695
1	5995	15-19	NA	NA	NA	NA	27.52259185	23.53333821	3.989253634	52.71240161	NA	NA	NA	MW	0	NA	NA	0	288	Ghana	01/05/2015	30/06/2015	2015.33	2015.49	2015 PMA-R4	PMA	0	0.262413561	0.524425789	0.27007137	0.01943268	0.017254382	0.027191197
1	5996	15-19	NA	NA	NA	NA	51.99062611	51.38235232	0.608273788	21.55569616	NA	NA	NA	MW	0	NA	NA	0	404	Kenya	01/11/2014	31/12/2014	2014.83	2015	2014 PMA-R2	PMA	0	0.275650622	1.025681358	0.38368265	0.030674089	0.006706352	0.030527508
1	5997	15-19	NA	NA	NA	NA	12.2499635	11.34538854	0.663894962	42.16780165	NA	NA	NA	MW	0	NA	NA	0	800	Uganda	01/07/2014	28/06/2014	2014.5	2014.49	2014 PMA-R1	PMA	0	0.215855804	1.011804187	0.136649517	0.009455016	0.002388931	0.011759218
1	5998	15-19	NA	NA	NA	NA	21.68586994	18.77575202	2.910117918	35.03589574	NA	NA	NA	MW	0	NA	NA	0	800	Uganda	01/01/2015	28/02/2015	2015	2015.16	2015 PMA-R2	PMA	0	0.194029898	0.548770784	0.200473215	0.013278843	0.002526427	0.008704456
1	6000	15-19	NA	NA	NA	NA	68.9	NA	NA	NA	NA	NA	NA	MW	0	NA	NA	0	218	Ecuador	15/06/2007	15/07/2012	2007.45	2012.54	2012 ENSANUT	National survey	0	NA	NA	NA	NA	NA	NA
1	6001	15-19	NA	NA	NA	NA	31.80678725	30.09165868	1.662452331	25.45865551	NA	NA	NA	MW	0	NA	NA	0	231	Ethiopia	01/04/2015	31/05/2015	2015.25	2015.41	2015 PMA-R3	PMA	0	0.205815859	0.629237113	0.172418836	0.016964997	0.007990375	0.021361175
1	6002	18-19	NA	NA	NA	NA	66.64			NA	NA	NA	NA	MW	+	NA	NA	0	36	Australia	29/07/2011	15/02/2012	2011.57	2012.12	2011-2012 HILDA	National survey	0	NA	NA	NA	NA	NA	NA
1	6003	15-19	NA	NA	Data pertain to urban centers with 2,000 or more people.	NA	64.11051445			NA	Data pertain to urban centers with 2,000 or more people.	NA	NA	MW	0	NA	NA	0	32	Argentina	01/05/2013	30/06/2013	2013.33	2013.49	2013 ENSSyR	National survey	0	NA	NA	NA	NA	NA	NA
1	6006	18-19	NA	NA	NA	NA	73.34264099	72.67953722	0.663103774	NA	NA	NA	NA	MW	+	NA	NA	0	76	Brazil	NA	NA	2013.25	2013.75	2013 PNS	National survey	0	NA	NA	NA	NA	NA	NA
1	6009	18-19	NA	NA	NA	NA	94	NA	NA	NA	NA	NA	NA	MW	+	NA	NA	0	528	Netherlands	01/07/2013	01/10/2013	2013.5	2013.75	2013 FFS	GGS	0	NA	NA	NA	NA	NA	NA
1	6014	15-19	NA	NA	NA	NA	6			49.9	NA	NA	NA	MW	0	NA	NA	0	882	Samoa	01/07/2014	01/08/2014	2014.5	2014.58	2014 DHS	National survey	0	NA	NA	NA	NA	NA	NA
1	6024	15-19	NA	NA	NA	NA	36.76969893	31.51265832	5.257040617	NA	NA	NA	NA	MW	0	NA	NA	0	704	Viet Nam	NA	NA	2015.25	2015.75	Annual APC	National survey	0	NA	NA	NA	NA	NA	NA
1	6025	18-19	NA	Modern methods include some cases of sterilisation for non-contraceptive reasons.	NA	NA	74.89209236			NA	NA	NA	NA	MW	+	NA	NA	0	40	Austria	22/09/2012	27/05/2013	2012.72	2013.4	2012-2013 GGS	GGS	0	NA	NA	NA	NA	NA	NA
1	6026	18-19	NA	NA	NA	NA	57.79			NA	NA	NA	NA	MW	+	NA	NA	0	36	Australia	15/08/2008	28/02/2009	2008.62	2009.16	2008-2009 HILDA	National survey	0	NA	NA	NA	NA	NA	NA
1	6033	15-19	NA	NA	NA	NA	26.6	25.9	0.7	NA	NA	NA	NA	MW	0	NA	NA	0	108	Burundi	01/11/2012	31/12/2012	2012.83	2013	2012 PMS	National survey	0	NA	NA	NA	NA	NA	NA
1	6037	15-19	NA	NA	NA	NA	48.04624903	34.59256562	13.45368341	24.61652081	NA	NA	NA	MW	0	NA	NA	0	404	Kenya	01/11/2015	31/12/2015	2015.83	2016	2015 PMA-R4	PMA	0	0.242850066	0.89932569	0.425574427	0.038618029	0.050402788	0.023379867
1	6055	15-19	NA	NA	NA	NA	6.3	5.2	1.1	33	NA	NA	NA	MW	0	NA	NA	0	204	Benin	01/11/2017	28/02/2018	2017.83	2018.16	2017-2018 DHS	DHS	0	NA	NA	NA	NA	NA	NA
1	6056	15-19	NA	NA	NA	NA	24.23905173	21.22825693	3.010794805	14.61602376	NA	NA	NA	MW	0	NA	NA	0	108	Burundi	01/10/2016	28/02/2017	2016.75	2017.16	2016 DHS	DHS	0	NA	NA	NA	NA	NA	NA
1	6084	15-19	NA	NA	NA	NA	54.00208426	53.16280947	0.839274789	18.85574482	NA	NA	NA	MW	0	NA	NA	0	104	Myanmar	01/12/2015	31/07/2016	2015.92	2016.58	2015-2016 DHS	DHS	0	0.14421712	1.011380098	0.233414429	0.028795207	0.003315759	0.014505178
1	6086	15-19	NA	NA	NA	NA	23.12174752	14.47904897	8.642698543	34.92125505	NA	NA	NA	MW	0	NA	NA	0	524	Nepal	01/06/2016	31/01/2017	2016.42	2017.08	2016 DHS	DHS	0	0.131015463	0.161503899	0.102936733	0.013394193	0.006229006	0.012108978
1	6094	15-19	NA	NA	NA	NA	43.5	37.5	6	21.4	NA	NA	NA	MW	0	NA	NA	0	144	Sri Lanka	14/05/2016	15/11/2016	2016.37	2016.87	2016 DHS	DHS	0	NA	NA	NA	NA	NA	NA
1	6097	15-19	NA	NA	NA	NA	10.44879878	8.133068012	2.31573077	26.39017675	NA	NA	NA	MW	0	NA	NA	0	626	Timor-Leste	16/09/2016	22/12/2016	2016.71	2016.97	2016 DHS	DHS	0	NA	NA	NA	NA	NA	NA
1	6099	15-19	NA	NA	NA	NA	21.87867544	20.55489187	1.323783566	30.40414257	NA	NA	NA	MW	0	NA	NA	0	800	Uganda	01/06/2016	30/11/2016	2016.42	2016.91	2016 DHS	DHS	0	NA	NA	NA	NA	NA	NA
1	6107	15-19	NA	NA	NA	NA	13.2186281	12.40304483	0.815583268	26.76452689	NA	NA	NA	MW	0	NA	NA	0	854	Burkina Faso	01/03/2016	31/05/2016	2016.16	2016.41	2016 PMA-R3	PMA	0	0.245300093	0.846008649	0.180362227	0.01486225	0.001050643	0.031569532
1	6114	15-19	NA	NA	NA	NA	20.40325591	17.58828428	2.814971633	39.341517	NA	NA	NA	MW	0	NA	NA	0	800	Uganda	01/04/2016	31/05/2016	2016.25	2016.41	2016 PMA-R4	PMA	0	0.230529689	0.41395328	0.1886556	0.011607629	0.005464975	0.015220508
1	6115	15-19	NA	NA	NA	NA	32.01357468	28.83369842	3.179876265	29.65159294	NA	NA	NA	MW	0	NA	NA	0	231	Ethiopia	01/03/2016	30/04/2016	2016.16	2016.33	2016 PMA-R4	PMA	0	0.218749073	0.471929153	0.212493557	0.021639459	0.011685551	0.024821759
1	6116	15-19	NA	NA	NA	NA	8.499703283	6.619937556	1.879765728	23.82222562	NA	NA	NA	MW	0	NA	NA	0	562	Niger	22/02/2016	29/04/2016	2016.14	2016.33	2016 PMA-R1	PMA	0	0.364642403	0.638066213	0.239032851	0.007015732	0.011324208	0.018527631
1	7045	15-19	NA	NA	NA	NA	6.862112041	6.671321796	0.0314	NA	NA	NA	NA	MW	0	NA	NA	0	566	Nigeria	01/05/2016	30/06/2016	2016.33	2016.49	2016 PMA-R1	PMA	0	0.252253252	1.005771716	0.141659276	0.005543885	3.16E-04	0.015398518
1	7336	15-19	NA	NA	Data pertain to nationals of the country.	NA	8.119193103	6.495354482	1.623838621	NA	Data pertain to nationals of the country.	NA	NA	MW	0	NA	NA	0	682	Saudi Arabia	29/04/2016	07/06/2016	2016.33	2016.43	2016 DS	National survey	0	NA	NA	NA	NA	NA	NA
1	7339	15-19	NA	NA	NA	NA	50.94759006	50.25786204	0.689728025	27.58298251	NA	NA	NA	MW	0	NA	NA	1	484	Mexico	15/09/2015	15/12/2015	2015.7	2015.95	2015 MICS	MICS	0	NA	NA	NA	NA	NA	NA
1	7344	18-19	NA	NA	NA	NA	77.15			NA	NA	NA	NA	MW	+	NA	NA	0	36	Australia	28/07/2015	07/02/2016	2015.57	2016.1	2015-2016 HILDA	National survey	0	NA	NA	NA	NA	NA	NA
1	7347	15-19	NA	NA	NA	NA	40.1	39.6	0.6	NA	NA	NA	NA	MW	0	NA	NA	0	231	Ethiopia	10/01/2014	30/04/2014	2014.02	2014.33	2014 MDHS	National survey	0	NA	NA	NA	NA	NA	NA
1	7348	15-19	NA	NA	NA	NA	32	29.1	3	17.6	NA	NA	NA	MW	0	NA	NA	1	418	Lao People's Dem. Republic	01/07/2017	30/09/2017	2017.5	2017.75	2017 DHS-MICS Special	DHS	0	NA	NA	NA	NA	NA	NA
1	7360	15-19	NA	NA	NA	NA	31.04464848	25.95569473	5.088953753	49.62101721	NA	NA	NA	MW	0	NA	NA	0	288	Ghana	01/08/2016	30/11/2016	2016.58	2016.91	2016 PMA-R5	PMA	0	0.228624561	0.501618626	0.309244607	0.029275822	0.012831618	0.019661987
1	7364	15-19	NA	NA	NA	NA	16.9	9.7	7.2	14.4	NA	NA	NA	MW	0	NA	NA	0	400	Jordan	01/10/2017	31/01/2018	2017.75	2018.08	2017 DHS	DHS	0	NA	NA	NA	NA	NA	NA
1	7366	15-19	NA	NA	NA	NA	5.6	5	0.6	12.3	NA	NA	NA	MW	0	NA	NA	0	562	Niger	01/10/2017	28/02/2018	2017.75	2018.16	2017 DHS-NS	National survey	0	NA	NA	NA	NA	NA	NA
1	7367	15-19	Preliminary data.	NA	NA	NA	7.4	5.9	1.5	17.9	NA	NA	NA	MW	0	NA	NA	0	586	Pakistan	22/11/2017	30/04/2018	2017.89	2018.33	2017 DHS	DHS	0	NA	NA	NA	NA	NA	NA
1	7369	15-19	NA	NA	NA	NA	35.84639259	29.71383408	6.132558507	27.90592072	NA	NA	NA	MW	0	NA	NA	0	608	Philippines	01/08/2017	31/10/2017	2017.58	2017.83	2017 DHS	DHS	0	NA	NA	NA	NA	NA	NA
1	7370	15-19	NA	NA	NA	NA	6.672598955	5.509552039	1.163046916	26.40745308	NA	NA	NA	MW	0	NA	NA	0	686	Senegal	01/01/2016	31/10/2016	2016	2016.83	2016 DHS	DHS	0	0.23687564	0.405022238	0.113821094	0.009322155	0.002143443	0.012679378
1	7371	15-19	NA	NA	NA	NA	2.878179508	2.477334036	0.400845472	11.18234949	NA	NA	NA	MW	0	NA	NA	0	762	Tajikistan	08/08/2017	11/11/2017	2017.6	2017.86	2017 DHS	DHS	0	NA	NA	NA	NA	NA	NA
1	7412	15-19	NA	NA	NA	NA	29.2	24.7	4.5	NA	NA	NA	NA	MW	0	NA	NA	0	450	Madagascar	NA	NA	2012.25	2012.75	2012-2013 ENSOMD	National survey	0	NA	NA	NA	NA	NA	NA
1	7419	15-19	NA	NA	NA	NA	64.55012239	50.14898706	14.40113532	NA	NA	NA	NA	MW	0	NA	NA	0	840	United States of America	NA	NA	2013.25	2013.75	2013-2015 NSFG	National survey	0	NA	NA	NA	NA	NA	NA
1	7423	15-19	NA	NA	Excluding some areas in the Balochistan province.	NA	4	NA	NA	NA	Excluding some areas in the Balochistan province.	NA	NA	MW	0	NA	NA	0	586	Pakistan	01/07/2013	30/06/2014	2013.5	2014.49	2013-2014 LSMS	LSMS	0	NA	NA	NA	NA	NA	NA
1	7427	18-19	NA	Modern methods exclude female and male sterilisation.	NA	NA	60	53.3	6.7	NA	NA	NA	NA	MW	+	NA	NA	0	616	Poland	20/10/2010	28/02/2011	2010.8	2011.16	2010-2011 GGS	GGS	0	NA	NA	NA	NA	NA	NA
1	7474	15-19	NA	NA	NA	NA	32.71549516	3.295730002	29.41976516	27.42083159	NA	NA	NA	MW	0	NA	NA	0	8	Albania	11/09/2017	20/02/2018	2017.69	2018.14	2017-2018 DHS	DHS	0	NA	NA	NA	NA	NA	NA
1	7479	15-19	NA	NA	NA	NA	48.90194583			18.8752195	NA	NA	NA	MW	0	NA	NA	0	360	Indonesia	01/10/2016	31/01/2017	2016.75	2017.08	2016-2017 PMA-R2	PMA	0	0.193795078	NaN	0.263528983	0.016652994	0	0.016025848
1	7480	15-19	NA	NA	NA	NA	37.87021735	37.79236036	0.0779	23.30815071	NA	NA	NA	MW	0	NA	NA	0	231	Ethiopia	01/04/2017	30/05/2017	2017.25	2017.41	2017 PMA-R5	PMA	0	0.168855471	1.006012629	0.187629853	0.021835975	2.77E-04	0.018181497
1	7481	15-19	NA	NA	NA	NA	21.8510556			33.55631041	NA	NA	NA	MW	0	NA	NA	0	800	Uganda	01/04/2017	31/05/2017	2017.25	2017.41	2017 PMA-R5	PMA	0	0.217948998	NaN	0.215571525	0.030308225	0	0.016425205
1	7482	15-19	NA	NA	NA	NA	3.661521945	1.76030482	1.901217125	30.16048722	NA	NA	NA	MW	0	NA	NA	0	566	Nigeria	01/04/2017	30/05/2017	2017.25	2017.41	2017 PMA-R2	PMA	0	0.302227066	0.63641683	0.155916786	0.004117706	0.002753267	0.012544304
1	7483	15-19	NA	NA	NA	NA	16.45051951			27.55752358	NA	NA	NA	MW	0	NA	NA	0	854	Burkina Faso	01/11/2016	31/01/2017	2016.83	2017.08	2016-2017 PMA-R4	PMA	0	0.25315222	NaN	0.217278704	0.031472083	0	0.037102775
1	7484	15-19	NA	NA	NA	NA	38.24611045			28.41067723	NA	NA	NA	MW	0	NA	NA	0	404	Kenya	01/11/2016	31/12/2016	2016.83	2017	2016 PMA-R5	PMA	0	0.235343871	NaN	0.265143386	0.031777725	0	0.02212534
1	7485	15-19	NA	NA	NA	NA	45.7	32.3	13.5	NA	NA	NA	NA	MW	0	NA	NA	0	68	Bolivia (Plurinational State of)	03/05/2016	30/09/2016	2016.34	2016.75	2016 DHS	National survey	0	NA	NA	NA	NA	NA	NA
1	7494	15-19	NA	NA	NA	NA	78.27454874	62.71569529	15.55885345	NA	NA	NA	NA	MW	0	NA	NA	0	152	Chile	01/11/2015	31/01/2016	2015.83	2016.08	2015-2016 ENCVS	National survey	0	NA	NA	NA	NA	NA	NA
1	7496	15-19	NA	NA	NA	NA	69.57046026	69.22774376	0.342716507	13.91718353	NA	NA	NA	MW	0	NA	NA	1	600	Paraguay	01/06/2016	16/09/2016	2016.42	2016.71	2016 MICS	MICS	0	NA	NA	NA	NA	NA	NA
1	7509	15-19	NA	NA	NA	NA	46.8	NA	NA	NA	NA	NA	NA	MW	0	NA	NA	0	156	China	NA	NA	2017.25	2017.75	2017 NFS	National survey	0	NA	NA	NA	NA	NA	NA
1	7514	15-19	NA	NA	NA	NA	11.48332262			24.71744235	NA	NA	NA	MW	0	NA	NA	0	562	Niger	01/05/2017	30/09/2017	2017.33	2017.75	2017 PMA-R2	PMA	0	0.346098046	NaN	0.245772872	0.016892209	0	0.030920308
1	7516	15-19	NA	NA	NA	NA	11.2	7.1	4.1	44.4	NA	NA	NA	MW	0	NA	NA	0	90	Solomon Islands	06/04/2015	18/09/2015	2015.26	2015.71	2015 DHS	National survey	0	NA	NA	NA	NA	NA	NA
1	7517	15-19	NA	Traditional methods include folk methods.	NA	NA	66.1	51.6	14.5	13.3	NA	NA	NA	MW	0	NA	Including folk methods.	0	604	Peru	NA	NA	2015.25	2015.75	2015 DHS	DHS	0	NA	NA	NA	NA	NA	NA
1	7518	15-19	NA	Traditional methods include folk methods.	NA	NA	66.7	52.7	13.9	12.4	NA	NA	NA	MW	0	NA	Including folk methods.	0	604	Peru	NA	NA	2016.25	2016.75	2016 DHS	DHS	0	NA	NA	NA	NA	NA	NA
1	7530	15-19	NA	NA	NA	NA	18.4	4.1	14.3	NA	NA	NA	NA	MW	0	NA	NA	0	31	Azerbaijan	01/08/2011	31/10/2011	2011.58	2011.83	2011 DHS-NS	National survey	0	NA	NA	NA	NA	NA	NA
1	7630	15-19	NA	NA	NA	NA	8.686346254	8.034089764	0.65225649	23.96088792	NA	NA	NA	MW	0	NA	NA	0	686	Senegal	01/04/2017	31/12/2017	2017.25	2018	2017 DHS	DHS	0	NA	NA	NA	NA	NA	NA
1	7641	15-19	NA	Traditional methods include folk methods.	NA	NA	62.3	47.3	15	10.57310685	NA	NA	NA	MW	0	NA	Including folk methods.	0	604	Peru	NA	NA	2017.25	2017.75	2017 DHS	DHS	0	NA	NA	NA	NA	NA	NA
1	7650	15-19	NA	NA	NA	NA	30.1	26.1	4	NA	NA	NA	NA	MW	0	NA	NA	0	450	Madagascar	16/06/2017	08/08/2017	2017.45	2017.6	2017 TRaC	National survey	0	NA	NA	NA	NA	NA	NA
1	7651	15-19	NA	NA	NA	NA	56.5	NA	NA	NA	NA	NA	NA	MW	0	NA	NA	0	188	Costa Rica	01/07/2015	31/12/2015	2015.5	2016	2015 RHS	RHS	0	NA	NA	NA	NA	NA	NA
1	7652	15-19	NA	NA	NA	NA	15.28903941	13.31064687	1.978392547	50.35589099	NA	NA	NA	MW	0	NA	NA	0	384	CÃ´te d'Ivoire	01/09/2017	31/10/2017	2017.67	2017.83	2017 PMA-R1	PMA	0	0.304184486	1.032961684	0.172495156	0.020996591	0.019692011	0.026690197
1	7653	15-19	NA	NA	NA	NA	6.164901774	5.163068108	0.633444593	28.75431448	NA	NA	NA	MW	0	NA	NA	0	566	Nigeria	01/04/2018	30/05/2018	2018.25	2018.41	2018 PMA-R3	PMA	0	NA	NA	NA	NA	NA	NA
1	7655	15-19	NA	NA	NA	NA	22.80748977	21.68451002	1.12297975	19.49848512	NA	NA	NA	MW	0	NA	NA	0	854	Burkina Faso	01/11/2017	31/01/2018	2017.83	2018.08	2017-2018 PMA-R5	PMA	0	0.266801741	0.725314124	0.296449169	0.041482131	0.005422835	0.048619872
1	7657	15-19	NA	NA	NA	NA	45.03893388			20.855116	NA	NA	NA	MW	0	NA	NA	0	404	Kenya	01/11/2017	31/12/2017	2017.83	2018	2017 PMA-R6	PMA	0	0.215861042	NaN	0.323721165	0.033548708	0	0.025168634
1	7671	15-19	NA	NA	NA	NA	85.58910846	79.19169474	6.397413725	NA	NA	NA	NA	MW	0	NA	NA	0	840	United States of America	NA	NA	2015.25	2015.75	2015-2017 NSFG	National survey	0	NA	NA	NA	NA	NA	NA
